# Supplementary material for: Systems spatiotemporal dynamics of traumatic brain injury at single-cell resolution reveals humanin as a therapeutic target
Source: Cell Mol Life Sci. 2022 Aug 11;79(9):480. doi: 10.1007/s00018-022-04495-9 (PMC9372016; doi:10.1007/s00018-022-04495-9)
Supplement: Supplementary file 2 — (XLSX 10 KB) [file 18_2022_4495_MOESM2_ESM.xlsx]

## Sheet: Sheet1
Supplementary Table 1. Total number of single cells passing QC for each tissue/timepoint/condition combination.
Tissue	Timepoint	Condition	Cell Number
Blood	24hrs	Sham	9097
Blood	24hrs	TBI	9761
Blood	7days	Sham	1825
Blood	7days	TBI	2117
Hippocampus	24hrs	Sham	7930
Hippocampus	24hrs	TBI	8058
Hippocampus	7days	Sham	8130
Hippocampus	7days	TBI	4895
Frontal Cortex	24hrs	Sham	5335
Frontal Cortex	24hrs	TBI	4125
Frontal Cortex	7days	Sham	11001
Frontal Cortex	7days	TBI	6621
