# Supplementary material for: Systems spatiotemporal dynamics of traumatic brain injury at single-cell resolution reveals humanin as a therapeutic target
Source: Cell Mol Life Sci. 2022 Aug 11;79(9):480. doi: 10.1007/s00018-022-04495-9 (PMC9372016; doi:10.1007/s00018-022-04495-9)
Supplement: Supplementary file 3 — (XLSX 10 KB) [file 18_2022_4495_MOESM3_ESM.xlsx]

## Sheet: Sheet1
Supplementary Table 2. Canonical cell type specific marker genes for annotating cell clusters.
Cell Type	Marker Gene
B Cells	Ms4a1
Treml4+ Monocytes	Ear1
Ly6+ Monocytes	Ccr2
Megakaryocytes	Ppbp
Cd4 T Cells	Il7r
Cd8 T Cells	Cd8a
Nk Cells	Nkg7
Granulocytes	Stfa2l1
Astrocytes	Aldoc
Ependymal	Ccdc153
Choroid Plexus Epithelial Cells	Folr1
Pan Oligodendrocytes	Olig1
Oligodendrocytes	Mobp
Newly Formed Oligodendrocytes	Fyn
Oligodendrocyte Precursors	Pdgfra
Microglia	P2ry12
Activated Microglia	Tnf
Macrophages	Lyz2
Endothelial	Flt1
Fibroblasts	Dcn
Pericytes	Kcnj8
Smooth Muscle Cells	Acta2
Neurogenesis1	Igfbpl1
Neurogenesis2	Top2a
Cajal Retzius	Nhlh2
Neurons	Snap25
Neurons	Syt1
