# Supplementary material for: Systems spatiotemporal dynamics of traumatic brain injury at single-cell resolution reveals humanin as a therapeutic target
Source: Cell Mol Life Sci. 2022 Aug 11;79(9):480. doi: 10.1007/s00018-022-04495-9 (PMC9372016; doi:10.1007/s00018-022-04495-9)
Supplement: Supplementary file 4 — (XLSX 93 KB) [file 18_2022_4495_MOESM4_ESM.xlsx]

## Sheet: CellTypeMarkerGenes
Supplementary Table 3. Data-driven cell type specific marker genes for each cell type cluster.
Hippocampus	Hippocampus	Hippocampus	Hippocampus	Hippocampus	Hippocampus	Hippocampus	Hippocampus	Hippocampus	Hippocampus	Hippocampus	Hippocampus	Hippocampus	Hippocampus	Hippocampus	Hippocampus	Hippocampus	Hippocampus	Hippocampus	Hippocampus	Hippocampus	Hippocampus	Hippocampus	Frontal Cortex	Frontal Cortex	Frontal Cortex	Frontal Cortex	Frontal Cortex	Frontal Cortex	Frontal Cortex	Frontal Cortex	Frontal Cortex	Frontal Cortex	Frontal Cortex	Frontal Cortex	Frontal Cortex	Frontal Cortex	Frontal Cortex	Frontal Cortex	Frontal Cortex	Frontal Cortex	Frontal Cortex	Frontal Cortex	Frontal Cortex	Frontal Cortex	Frontal Cortex	Frontal Cortex	Frontal Cortex	Blood	Blood
Activated Microglia	Astrocytes	CA1 Dorsal	CA1 Ventral	CA 2/3	Choroid Plexus Epithelial	Cajal Retzius	Dentate Gyrus	Endothelial	Entorhinal Cortex	Ependymal	Fibroblasts	Interneurons	Macrophages	Microglia	Neurgenesis1	Neurogenesis2	Newly Formed Oligodendrocytes	Oligodendrocytes	Olidodendrocyte Precusor Cells	Pericytes	Smooth Muscle Cells	Subiculum	Activated Microglia	Astrocytes	Endothelial	Interneurons Calb2+	Interneurons Dlk1+	Interneurons Foxp1+	Interneurons Foxp2+	Interneurons Nrip3+	Interneurons Sst+	Interneurons Tac1+	Interneurons Trh+	Interneurons Vip+	Layer 2/3 Neurons	Layer 6 Neurons	Macrophages	Microglia	Neurons Zscan20+	Neurogenesis1	Neurogenesis2	Newly Formed Oligodendrocytes	Oligodendrocytes	Oligodendrocyte Precursor Cells	Pericytes	Piriform Cortex	Smooth Muscle Cells	B Cells	Cd8 T Cells
Ccl4	Slc1a2	Gria1	Nov	Nrip3	Tmem117	Ndnf	C1ql2	Ly6c1	Hs3st4	Ccdc153	Lum	Slc32a1	H2-Aa	C1qb	Igfbpl1	Top2a	Enpp6	Plp1	Cacng4	Vtn	Acta2	Vsnl1	Ccl4	Slc1a2	Flt1	Calb2	Resp18	Gpr88	Foxp2	Cpne6	Resp18	Isl1	Trh	Pnoc	Cck	Tbr1	Pf4	C1qb	Zscan20	Igfbpl1	Top2a	Bmp4	Plp1	Pdgfra	Vtn	Abi3bp	Myh11	Cd74	Cd8b1
Cd83	Aldoc	Galntl6	Cpne7	Crym	1500015O10Rik	1500016L03Rik	Epha7	Ly6a	Snhg11	Enkur	Dcn	Gad2	Pf4	P2ry12	Neurod1	Ube2c	Pcdh17	Ermn	Pdgfra	Kcnj8	Tpm2	Gabra1	Ccl3	Aldoc	Ctla2a	Kcnip2	Dlk1	Rgs9	Snhg11	Gad1	Sst	Tac1	Th	Kit	Lingo1	Nptx1	Mrc1	Cx3cr1	Sst	Dlx1	Cenpf	Enpp6	Ptgds	Cacng4	Kcnj8	Slc17a7	Tagln	H2-Ab1	Cd8a
Il1a	Slc1a3	Gm26905	Dcn	Nptxr	Ccdc15	Nhlh2	Rasl10a	Itm2a	Myt1l	Sntn	Col1a2	Gad1	Ms4a7	C1qc	Cd24a	Pbk	Gpr17	Cldn11	Vcan	Rgs5	Myh11	Cck	Tnf	Clu	Ly6a	Nrsn1	Zcchc12	Ppp1r1b	Meg3	Pcp4	Tmem130	Syt6	Gad2	Vip	Nptxr	Rph3a	F13a1	Ctss	Nrgn	Cd24a	Mki67	Bfsp2	Ermn	Vcan	Plac9a	Nrn1	Mustn1	H2-Aa	Trbc2
Ccl3	Clu	Epha6	Grp	Cck	Sostdc1	Trp73	Ano3	Flt1	Chgb	Dnali1	Inmt	Dlx1	Lilrb4	Ctss	Dcx	Racgap1	Bfsp2	Mag	Cdo1	Higd1b	Myl9	Arpp21	Ccl12	Sox9	Ly6c1	Zic1	Hap1	Scn4b	Syt1	Syt1	Crhbp	Rgs9	Snhg11	Npy	Slc17a7	Adcy1	Lyz2	Siglech	Ncdn	Nrep	Cenpe	Gpr17	Mag	Nxph1	Higd1b	3110047P20Rik	Lmod1	H2-Eb1	Thy1
Tnfaip3	Pla2g7	Grin2b	Sv2b	Gpr22	Igfbp2	Fam159b	Bdnf	Cldn5	Elavl4	Tmem212	Aox3	Zcchc12	AI607873	C1qa	Mex3a	Mki67	Fyn	Mal	Matn4	Slc6a20a	Mylk	Snap25	C1qb	Slc1a3	Apold1	Meg3	Tmem130	Tac1	Meis2	Atp1b1	Disp2	Pkib	Gria1	Cnr1	Sv2b	3110035E14Rik	Wfdc17	P2ry12	Prkar1b	Dlx6os1	Hmmr	Rassf10	Car2	Emid1	Mgp	Clmp	Acta2	Ly6d	Ms4a4b
Ctss	Gja1	Neurod6	Rab3c	Hpca	Tshz3	Lhx1	Gria1	Slco1a4	Syt5	Fam216b	Coch	Dlx6os1	H2-Eb1	Csf1r	Calb2	Cdca3	Rassf10	Opalin	C1ql1	P2ry14	Tagln	Chgb	Cd83	F3	Eltd1	Dlx1	Scg2	Pdyn	Synpr	Penk	Ecel1	Clic6	Nap1l5	Chl1	Nell2	Pde1a	Cybb	C1qc	Cplx1	Gm17750	Tpx2	Pycr1	Apod	Ptprz1	Rgs5	Lmo3	Tpm2	Cd79b	Il7r
C1qb	Ppap2b	Cnksr2	Cpne6	Tmem59l	Folr1	Reln	Ppfia2	Bsg	Vsnl1	Fam183b	Cyp1b1	Npy	Wfdc17	Selplg	Dpysl3	Cdk1	Rnf122	Mog	Neu4	Atp13a5	Pln	Snhg11	Ctss	Atp1a2	Ptprb	Celf4	Celf6	Drd1a	Gad1	Nrxn3	Vgf	Col11a1	Meg3	Slc32a1	Pgm2l1	Rprm	Ms4a7	C1qa	Nptxr	Stmn2	Casc5	Pcdh17	Cldn11	C1ql1	Cald1	Slc30a3	Pln	Igkc	Cd3d
C1qc	Ntsr2	Fam19a1	Ina	Cnr1	Calml4	Lhx5	Synpr	Egfl7	Meg3	Meig1	Cped1	Resp18	Mrc1	Siglech	Draxin	Birc5	Bcas1	Cnp	Emid1	Plac9a	Rrad	Fbxw7	C1qc	Aqp4	Ly6c2	Snhg11	Gprasp2	Hpca		Ndrg4	Clstn3	Rreb1	Resp18	Rph3a	Olfm1	Neurod6	Clec4n	Ly86	Thy1	Stmn1	Cdca8	Mycl	Mal	Scrg1	Slc6a20a	Ttc9b	Sncg	Iglc2	Arl4c
Plek	Scg3	Iqgap2	Syt4	Nefm	Prlr	Cacna2d2	C1ql3	Ctla2a	Snca	1700001C02Rik	Col1a1	Tmem130	Cybb	Fcrls	Hn1	RP23-45G16.5	Sirt2	Car2	Olig1	Sod3	Lmod1	Syt1	Il1a	Slc4a4	Igfbp7	Grip1	Pnmal2	Akap5		Snhg11	Npy	Cartpt	Slc32a1	Gabra1	Neurod6	Pgm2l1	H2-Aa	Tgfbr1	Cck	Dpysl3	Birc5	Pak4	Cryab	Cspg4	Atp13a5	Fam19a1	Myl9	Ms4a1	Cd3g
C1qa	Aqp4	Itpka	Mpped1	Elavl2	Kl	Slc17a6	Calb1	Gpr116	Pcp4	1700012B09Rik	Itih2	Sst	Lyz2	Cx3cr1	Sox4	Esco2	Bmp4	Cryab	Rlbp1	Ecm2	Filip1l	Syt4	Plek	Apoe	Itm2a	Fstl5	Chga	Pde10a		Gng4		Akap5	Zwint	Rab3c	Nptx1	Slc17a7	AI607873	Laptm5	Ndrg4	Tuba1a	RP23-45G16.5	Fyn	Trf	Matn4	Sod3	Nefm	Mylk	Bank1	Cd3e
Mafb	Mt2	Sphkap	Eno2	Grp	Otx2	Ankrd35	Nefl	Spock2	Snap25	1700016K19Rik	Efemp1	Pnoc	H2-Ab1	Laptm5	Gm17750	Ccna2	Nfasc	Trf	Ptprz1	Ifitm1	Mustn1	Meg3	Ly86	Sdc4	Gpr116	Htr1f	Zdbf2	Rasd2		Syt6		Npy1r	Celf4	Parm1	Nrn1	Ccl27b	Cbr2	Ctsd	Bzrap1	Tubb3	Pbk	Mpzl1	Qdpr	Cdo1	P2ry14	Chga	Olfr558	Cd55	Tcf7
Laptm5	Ttyh1	Bcl11b	Cnr1	Napb	Wfdc2	Cd274	Fam163b	Ptprb	Rprm	Dynlrb2	Cp	Scg2	Cbr2	Tmem119	Nfib	Cdca8	Mpzl1	Qdpr	Olig2	Rgs4	Crispld2	Slc17a6	Tnfaip3	Ppap2b	Slco1a4	Gabrg2	Ndn	Adcy5		Kcnb2		Bcl11b	Hap1	Pde11a	Enc1	Slc8a2	Ccl7	Hexb	Shisa7	Tmsb10	Prc1	Col9a3	Il33	Olig1	Art3	Fam19a2	Map3k7cl	Ighm	Sidt1
Csf1r	Gpr37l1	Rasgrp1	Pde1a	Gabra5	Kcne2	Snhg11	Scg2	Abcb1a	Cntnap4	Stoml3	Alpl	Vstm2a	Ms4a6c	Ly86	Nfix	Hmmr	Rab33a	Stmn4	Cspg4	Myl9	Nexn	Scn2a1	Fcrls	Gpr37l1	Abcb1a	Rprm	Ahi1	Pcp4		Gad2		Prkar2b	Pianp	Dner	Thy1	Tmem178	Ccl24	Csf1r	Dnm1	Marcksl1	Ckap2	Tmem108	Cnp	Neu4	Pla1a	Nptxr	Aoc3	Ebf1	Nkg7
Tyrobp	Slc4a4	Fibcd1	Mal2	Ly6h	Clic6	Pcp4	Wipf3	Esam	Olfm3	3300002A11Rik	Clmp	Grik1	Ccl7	Ctsd	Marcksl1	Plk1	Cnksr3	2019-09-04	Qpct	Cald1	Pdlim3	Stmn2	C1qa	Ndrg2	Klf2	Gad1	Syt4	Pde1b		Eno2		Gad2	Bex2	Erbb4	Nrgn	Mal2	Lyve1	Selplg	Vsnl1	Tubb2b	Cenpa	Rnf122	Opalin	Olig2	Gper1	Lingo1	Pdlim3	Ralgps2	Dapl1
Cx3cr1	Cpe	Kcnh7	Pgm2l1	Ndrg4	F5	Ebf3	Cdh9	Slc9a3r2	Rph3a	Krt15	Ogn	Kcnc1	Tgfbi	Hexb	Tubb3	Mis18bp1	Adamts4	Tspan2	Nxph1	Ace2	Sncg	Stmn3	Hexb	Htra1	Egfl7	Meis2	Bex2	Arpp21		Synpr		Meg3	Tmx4	Gad2	C1ql3	Foxp2	H2-Eb1	Lgmn	Cplx2	Hn1	Esco2	Sirt2	Tmem88b	Tmem100	Myl9	Rasl10a	Des	Btla	Lef1
Fcer1g	Ndrg2	Scn3b	Gda	Neurod2	Igf2	Tbr1	AI593442	Tm4sf1	Chga	4930451C15Rik	Spp1	Kcnc2	F13a1	Gpr34	2610203C20Rik	Cenpf	Sema5a	Il33	Cspg5	Pdgfrb	Map3k7cl	Copg2	Tyrobp	Mt2	Cldn5		Caly	Dclk3		Pcbp3		Nrp2	Rab3a	Gad1	Scn2a1	Hpcal4	H2-Ab1	Gpr34	Nptx1	Dcx	Spc25	Rnd2	Pex5l	Rlbp1	Ace2	Crtac1	Crip1	Mef2c	Ly6c2
Trem2	Mt3	Nell2	Grin2b	Rab3c	Rdh5	Meg3	Camk2b	Ramp2	Serpini1	Dmkn	Aldh1a2	Celf6	Clec4n	Tgfbr1	Fxyd6	Spc25	1810041L15Rik	Apod	Tmem100	S1pr3	Olfr558	Atp1b1	Gm14023	Ntsr2	Cd93		Gnas	Baiap2		Arpp21		Crtac1	Scg2	Thy1	Chn1	Rims1	Lilrb4	Fcrls	Sncb	Nnat	Ube2c	Brca1	Tspan2	Gpr17	Pdgfrb	Cntn5	Hspb2	Blnk	Skap1
Siglech	Cldn10	Prkcg	Fezf2	Nefl	Htr2c	Diablo	Slc30a3	Klf2	Gda	Odf3b	Nupr1	Elavl2	Cxcl2	Trem2	Stmn1	Kif23	Rnd2	Ptgds	Kcnd2	Igfbp7	Crip1	Camk2n1	Csf1r	Gja1	Slc2a1		Snhg11	Strip2		Slc32a1		Tmem158	Rtn1	Scn1a	Neurod2	Vsnl1	Ms4a6c	Tmem119	Phyhip	Sox4	Ccnb1	Gp1bb	Enpp2	Qpct	Nbl1	Lingo2	Cnn1	Pax5	Cd226
Selplg	Tspan7	Snhg11	Crym	Thy1	Col8a1	Gap43	Snca	Ly6e	Tbr1	Cdhr3	Serping1	Snhg11	Cd74	Lgmn	Prox1	Aurkb	Tmem163	Mobp	Fabp7	Abcc9	Des	Olfm1	Laptm5	Atp1b2	Ccdc141		Rit2	Elmod1		Grin1		Copg2		Vstm2a	Vsnl1	Sv2b	Ctsc	Trem2	Scn1b	Tubb5	Mis18bp1	Nfasc	Mobp	3110035E14Rik	Abcc9	Scube1	Palld	Fchsd2	Prkcq
P2ry12	Mlc1	Hpca	Nptxr	Gria1	Ace	Ramp1	Dsp	Eltd1	Crym	Iqca	Igfbp4	Rab3c	Gp49a	4632428N05Rik	Tubb5	Ckap2	Pak4	Tubb4a	Scrg1	Art3	Fbxl22	Camk4	Cx3cr1	Ezr	Podxl		Rab3b	Tmem158		Rbfox3		Rerg		Snhg11	Kif5c	Scn2a1	Cxcl2	4632428N05Rik	Chn1	Meis2	Cdc20	Dusp15	Mbp	Shc4	Ifitm1	Sv2b	Plac9a	Cd22	Klrd1
Gm14023	Atp1a2	Sema3e	Ndrg4	Snca	Steap1	Elavl4	Ryr2	Cxcl12	Atp6v1g2	Crygn	Col12a1	Meg3	Msr1	Tyrobp	Nrep	Tpx2	Pik3r3	Aspa	Lrrc4c	Enpep	Rasl11a	A030009H04Rik	Fcer1g	Acsbg1	Palmd		Ly6h	Camk4		Celf2		Dclk3		Tro	Ppp3ca	Ak5	Mndal	Tyrobp	Gm10419	Dlx2	Cdca3	Dct	2019-09-04	Cspg5	Ecm2	Hs3st4	Serping1	H2-Ob	Bcl11b
Ly86	Prdx6	Grin2a	Gpr22	Camkv	Spint2	Cib2	Rph3a	Slc2a1	Celf4	Lrrc71	Pcolce	Rab3b	Ctsc	Apbb1ip	Hmgb3	Sgol1	9530059O14Rik	Gpr37	Ccnd1	Mgp	Palld	Ndrg4	Trem2	Fgfr3	Esam		Rims3	2010300C02Rik		Icam5		Rasgrf1		Syn2	Slc30a3	Lpgat1	Ccl2	Unc93b1	Stx1b	BC005764	Ccna2	Bcas1	Mog	Ccnd1	Pth1r	Htr2c	Filip1l	Camk2b	Rgcc
Nfkbiz	Atp1b2	D3Bwg0562e	Disp2	Syn2	Krt18	Stmn2	Nell2	Id1	Pgm2l1	1700094D03Rik	Serpinf1	Gprasp2	Gpr65	Fcer1g	Nnat	Kif20b	Slc44a1	Fa2h	Serpine2	Colec12	Myom1	Napb	Itgam	Ttyh1	Sptbn1		Impact	Nexn		Meg3		Cacng3		Chd5	Frrs1l	Fhl2	Ifi204	Fcer1g	Snca	Islr2	Rrm2	9530059O14Rik	Aplp1	Susd5	Igfbp7	Bdnf	Myom1	H2-DMb2	Lck
Aif1	Gstm1	Camkv	Galnt9	Atp6v1g2	Ccdc135	Dync1i1	Nptx1	Ly6c2	Nr4a2	Gm17384	Bgn	Atp6v1g2	Ccr1	Rgs10	Tubb2b	Rrm2	Dusp15	Aplp1	Epn2	Slc16a12	Aoc3	Neurod6	Siglech	Cpe	Nostrin		Zwint	Ano3		Ncdn		Pnmal2		Scg2	Gabra1	Chgb	Dab2	Olfml3	Sh3gl2	Nrxn3	Aspm	Tnr	Gatm	Sulf2	Gja4	Syt13	Nexn	Cd37	Ccnd2
Tnf	Cxcl14	Gabra5	Atp6v1g2	Snap25	Tmem72	Clstn2	Sphkap	Sox17	Fezf2	E230008N13Rik	Mgp	Stmn2	Ifi27l2a	Itgam	Tuba1a	2810417H13Rik	Gjc3	Gatm	Brinp3	Slc19a1	Gm13889	Nefl	P2ry12	Prdx6	Pecam1		Ctxn2	Bcl11b		Lgr5		Ahi1		Atp1a3	Lmo4	Ppp2r2c	Tgfbi	Fcgr3	Pde1b	Mfap2	Fam64a	Kif19a	Tubb4a	Fabp7	Enpep	Rprml	Crispld2	Gm19980	Dnajc15
Rgs10	Fam107a	Pde1a	Nefl	Hpcal4	Msx1	Nr2f2	Ppp1r1a	Ifitm3	Gpr123	Lrrc36	Slc7a11	Nrsn1	Ifi204	Fcgr3	Lrba	Cdca2	Kank1	Tmem88b	Cntn1	Nbl1	Flna	Mef2c	Lgmn	Mt1	Fxyd5		Gaa	Cpne5		Celf4		Dner		Hcn1	Gabbr2	Ina	Cd36	Apbb1ip	Ywhag	H3f3b	Aurkb	Tcf7l2	Stmn4	Serpine2	Slc19a1	Thy1	Olfr78	D17H6S56E-5	Cd27
Ier5	Acsbg1	Syt1	Scn2a1	Uchl1	Ppp1r1b	Twsg1	Pcp4	Pglyrp1	Sh3gl2	Dnaaf3	Moxd1	Cnr1	Dab2	Hpgds	Zbtb20	Cdc20	Ablim2	Ugt8a	Pcdh15	Atp1a2	Cald1	Stxbp1	Nfkbiz	Gm3764	Bsg		Peg3	Caln1		Wipf3		Gng7		Necab1	Rtn1	Trim66	Igf1	Maf	Snap25	Robo2	Ckap2l	Pik3r3	Ndrg1	Cntn1	Colec12	Kcnma1	Gja4	Fcer2a	Tmem66
Bcl2a1b	Mmd2	Hcn1	Thy1	Tceal5	Cldn2	Bex2	Ptk2b	Slco1c1	Neurod6	Ccdc113	Cfh	Syt1	Lgals1	Rnase4	Tcf4	Casc5	Parvb	Grb14	Ednrb	Gper1	Errfi1	Nrgn	Aif1	Gstm1	Kitl		B630019K06Rik	Lrrc10b		A930011O12Rik		Plcb1		Syt1	D430041D05Rik	Kcnj3	Clec4a2	P2ry13	Dynll2	Ccnd2	Spc24	Gjc3	Scd2	3632451O06Rik	Casq2	Chgb	Cald1	Swap70	Lat
Fcrls	Slc6a11	Hs6st3	Gria1	6330403A02Rik	Lbp	Flrt3	Olfm1	Sdpr	Syn2	Ppp1r36	Tgfbi	Nrip3	Il1b	Maf	Crmp1	Aspm	Plxnb3	Epb4.1l3	Kcnip3	Gja4	Aspn	Necab1	Zfp36	Tril	Kdr		Nap1l5	Grm5		Ryr2		Pcdh8		Nyap2	Prkcb	Dnm1	Cd74	Aif1	Slc17a7	Mex3a	2810417H13Rik	Neu4	Gpr37	Ednrb	Cox4i2	Sphkap	Flna	Cd19	Ms4a6b
Nfkbia	Gjb6	Wipf3	Snap25	Hs3st4	Slc2a12	Pkib	D3Bwg0562e	Igfbp7	Syt1	Ccdc19	Islr	Snap25	Cd14	Cst3	Pcp4	Spc24	Tcf7l2	Mbp	3110035E14Rik	Gucy1b3	Tpm1	Ttc3	Atf3	Mlc1	Ahnak		Chgb	D3Bwg0562e		Dgkb				Vsnl1	Mal2	Stxbp1	Stab1	Rgs10	Olfm1	Crmp1	Cdk1	Kank1	Ugt8a	Gpt2	S1pr3	Stmn2	Mrvi1	Faim3	Rplp1
Dennd4a	Sparcl1	Tenm2	Ldb2	Atp1a3	Car12	Celf4	Adcy1	Slc6a6	Stmn3	Iqcg	Rcn3	Nap1l5	Ms4a6b	Olfml3	2019-09-03	Kifc1	Gnb4	Traf5	Sox6	Lhfp	Ptrf	Pcsk2	Olfml3	Ednrb	Cxcl12		Zcchc18	Cnksr2		Slc4a10				Slc38a1	Syt1	Gda	Ccl9	Cst3	Ppp3r1	Hmgb3	Cks1b	Cnksr3	Aspa	Epn2	Ggt5	Nefl	Slc38a11	2019-03-01	Tgtp2
Atf3	Apoe	Crym	Snca	Rab3a	Col9a3	5330417C22Rik	Rbfox1	Wfdc1	Atp2b4	Ccdc33	Emp1	Gabra1	Ccl2	Fam105a	Ddah2	Prc1	Slc22a23	Gm21984	3632451O06Rik	Plac9b	Ntn4	Cnksr2	Cd53	Scg3	Wfdc1		Disp2	Snhg11		Gabra2				Galnt14	Phyhip	Hpca	Fcgr2b	Rnase4	Rusc1	Gng2	Uhrf1	1810041L15Rik	Sec11c	Dscam	Bgn	Olfm1	Aspn	Aff3	Itk
Gpr34	Hsd11b1	Epha4	Slc17a7	Prkce	Defb11	Kcnh7	Rasgrf1	Pecam1	Hpcal4	Tctex1d4	Emp3	Nrxn3	Ccl12	Inpp5d	Mtss1	Cep55	Cnp	Pex5l	Dscam	Cd248	Plac9a	Rtn1	Fcgr3	Bcan	Cdh5		Gap43	Gad2		Bex2				Sv2a	Clstn1	Ryr2	Ccl12	Ptgs1	Eef1a2	Zfp704	Nusap1	Rhbdl2	Kcna1	Pcdh15	Cd248	Ntng1	Rrad	Foxp1	H2-Q7
Zfp36	Htra1	Spink8	Gabra1	Celf4	Steap2	Robo2	Cpne6	Apold1	Napb	1600029I14Rik	Igf2	Chga	Srgn	Hmha1	Sema3c	Ndc80	Chn2	Gsn	Shc4	Il34	Gja4	Calm2	Mafb	Ptprz1	Pglyrp1		A730017C20Rik	Camk2b		Sez6				Ptprn	Rab15	Phyhip	Cfp	Hpgds	Ptpn5	Lrba	Neil3	Tmem163	Gjb1	Sh3bp4	Plac9b	Slc24a2	Rasl11a	Man1a	Ctsw
Mpeg1	F3	Gria3	Myt1l	Camk2b	1110059M19Rik	Emx2	Lrrtm4	Id3	Ncald	Mia	Fstl1	Bex1	Fcer1g	Aif1	Neurod2	Ckap2l	Lrrc42	Csrp1	Stk32a	Notch3	Vim	Syt5	Cst3	Sc4mol	Cgnl1		6330403K07Rik	Rbfox1		Cadm3				Slc7a14	Syt13	Matk	Maf	Lpcat2	Gabrg3	Cdca7	Nuf2	Ust	Fa2h	Pllp	Rgs4	Scn2a1	Nrip2	Syk	Trbc1
Lgmn	Tmem47	Ppm1e	Snhg11	Scn2a1	Sulf1	Dach1	Elmod1	Ablim1	Pde1a	Gm10714	Igfbp2	Impact	Pim1	Csf3r	BC048502	Cenpa	Rap2a	Desi1	Mmp16	Trpc3	Perp	Atp2b4	Nfkbia	S1pr1	Lef1		Spint2	Ndrg4		Tmem59l				Slc6a1	Camk2a	Cnksr2	Ms4a6b	Mpeg1	Vamp2	Sp9	Rad51	Slc22a23	Ccp110	Brinp3	Aspn	2010300C02Rik	Ntn4	Apobec3	Epsti1
Ccl12	Acsl6	Ndst3	Nrgn	Cpne7	Hemk1	Bcl11a	Chn1	Car4	Rasgrp1	1700026D08Rik	Colec12	Gria1	Stk17b	P2ry13	Stmn2	Nusap1	Neu4	Cmtm5	Slc35f1	Heyl	Sorbs2	Tenm2	Ncf1	Acsl3	Erg		Bex1	Myt1l						Rian	Map1b	Pcnxl2	Lgals1	Inpp5d	Bex1	Rnasel	Kif23	Pdcd4	Tnfaip6	Phlda1	Tbxa2r	Napb	Tpm1	Ly6e	Gramd3
Icam1	Mt1	Meg3	Stmn2	Grin2b	Kcnj13	Gprasp2	Trpc6	Abcg2	Sncb	Ccdc146	Nid1	Rian	Stab1	Ptgs1	Nfia	Mns1	Ust	Ppp1r14a	Csmd1	Gjc1	Igfbp7	Atp2b2	Selplg	Mfge8	Ifitm3		Vgf	Atp1a3						Atp1b1	Stmn2	Epb4.1l1	Ms4a6d	Golm1	Sgsm1	Dbn1	Hist1h2ap	Gm15440	Ttll7	Kcnip3	Il34	Snap91	Igfbp7	Zfp318	Rplp0
Junb	Fgfr3	Kcnip4	Cnih3	Pcdh20	Slc13a4	Olfm1	Ndrg4	Emcn	Syt4	Rsph1	Ifitm1	Slc38a1	Maf	Unc93b1	Tmsb10	Cenpe	Col9a3	Efnb3	Sgcd	Nid1	Phldb2	Pgm2l1	Bcl2a1b	Fam107a	Cd34		Scn9a	Kcnip2						Sobp	Dnm1		Il1b	Mafb	Sptbn4	Bcl11a	Hmgb2	Chn2	Anln	Bcan	Igf2	Sult4a1	Wtip	Pou2af1	Atp1b3
Ctsd	Bcan	Gabrb3	Cplx2	Eno2	Gmnc	Cit	Caly	Pcp4l1	Bcl11b	1700009P17Rik	Aebp1	Dner	Ctss	Lair1	Epha4	Tacc3	Tmem108	Fez1	Sulf2	Slc38a11	Nrip2	Ywhah	Cd14	Pla2g7	Ramp2		Gad2	Wfs1						Serpini1	Camk2n1		Bmp2	Ltc4s	Rab3a	Arx	Cdc25c	Plxnb3	Tppp	Sox6	Notch3	Kcnh7	Gm13861	Bcl11a	Hcst
Itgam	Mfge8	Scn2a1	Ntng1	Frrs1l	Gm11744	Cntnap2	2010300C02Rik	Kitl	Ano3	Ppp1r32	Sned1	Clstn3	Alox5ap	Mafb	Casp3	Nuf2	Gltp	Slc48a1	Bcan	Perp	Rgs4	Rbfox3	C3ar1	Acsl6	Slco1c1		Uchl1	Erc2							Prkar1b		C1qb	Pld4	Syt13	2610203C20Rik	Arhgap11a	Gipc1	Gm21984	Slc35f1	Atp1a2	Scn1b	Mgp	Bach2	Rpl12
Tgfbr1	Grin2c	Egfem1	Gria3	Gda	Slc4a5	Cacna2d1	Ak5	Kdr	Zwint	1300017J02Rik	Nr2f2	Chgb	Mndal	Golm1	Cplx2	Hist1h2ap	Tns3	Tnfaip6	Tnr	Zic1	Tinagl1	Sncb	Hpgds	Mt3	Ablim1		2010204K13Rik	Ptpn5							Cyfip2		Cd14	Sparc	Kcnq2	Map1b	C230088H06Rik	Rab33a	App	Csmd1	Heyl	Sncb	Rasl12	Siglecg	Il18r1
Rnf19b	Ptprz1	Sez6	C1ql3	Stmn3	Lrriq1	Ndn	Nrn1	Vwa1	Stmn2	Ak7	Tbx18	Atp1a3	Tyrobp	Cyth4	Miat	Ccnb2	2810468N07Rik	Fth1	Myt1	Aspn	Myl6	Syn2	Ctsd	Tmem47	Rgs5		Slc3a1	Cplx2							Cnksr2		C1qa	B2m	Syt4	Rtn1	Kif22	Ssh3	Fth1	S100a1	Egflam	Kif5c	Perp	Cr2	Smc4
Btg2	Gfap	Mal2	Syt1	Nsg2	Pcolce	6330403K07Rik	Cplx2	Hspb1	Lmo3	Unc5cl	Rbp1	Scn1a	Cd68	4933406I18Rik	Ezh2	Kif15	Ugt8a	Lgi3	Gpt2	Ptn	Mrvi1	Celf4	Gpr34	Gjb6	Fn1		Rian	Neto1							Stx1a		C1qc	Hmha1	Lmo3	Nsg2	Lmnb1	Idh1	Ptprd	Lrrc4c	Lhfp	Syp	Rbm24	Filip1l	Actn1
C3ar1	Cspg5	Frrs1l	Scn8a	Nrgn	Trpm3	Plekha7	Fam131a	Tsc22d1	Scn2a1	Rsph4a	Ifitm2	A030009H04Rik	Tmsb4x	Nav3	Pkia	Kif4	Phyhipl	Stmn1	Lrrtm4	Ano1	Pcp4l1	Map9	Rgs10	Slc6a11	Tpm4		Pgrmc1	Penk							Creg2		Srgn	Cd53	Thra	Fxyd6	Cks2	Slc44a1	Cntn2	G0s2	Naalad2	Enc1	Rgs4	Ikzf3	Fam189b
Cd53	S1pr1	Grm5	St6galnac5	Nell2	Cdkn1c	Angpt1	Rbfox3	Kank3	Atp1b1	Cd24a	Vtn	Peg3	Apoe	Serinc3	Cttnbp2	H2afx	Lgi3	Pllp	Nrxn1	Dock6	Rasl12	Rab3a	Tmem119	Ntrk2	Ptrf		Syt13	Rasgef1a							Snca		Tyrobp	Nav3	Trp53i11	Hnrnpa1	Smc2	Lcorl	Gsn	Gm2a	Slc30a10	Stmn3	Ptrf	Snx2	Ptpn22
Egr1	Ntrk2	Rbfox1	Gabrb3	Neurod6	9430041J12Rik	Map1b	Gabrg2	Eng	Ndrg4	Rarres2	Col18a1	Stmn3	B2m	Itgb5	Ttc3	Cenpk	Zfp488	Ndrg1	Nlgn1	Lin7a	Mcam	Prkar1b	KCTD12	Cxcl14	9430020K01Rik		Meg3	Cacna2d3							Kcnv1		Lst1	Itgb5	Rtn1	Tiam2	Racgap1	Cnp	St18	Chl1	Gpx8	Nell2	Vim	Fcrla	Cd247
Cst3	Rgs20	Lrrc7	Bcl11b	6330403K07Rik	Cldn1	Bex1	Kcnip4	Srgn	Rtn1	Hdc	Bicc1	Syt4	Cyba	Cd53	Zbtb18	Cks1b	Myrf	Scd2	Gm4876	Myo1b	Nos1ap	Nell2	4632428N05Rik	Cldn10	Uaca		Ngfrap1	Camkv							Camk4		Ptpn18	Fam105a		Atpif1	2810442I21Rik	Sez6l	Galnt6	Rgcc	Myo1b	Kcnh1	Asb2	Birc3	Tpt1
Gpr84	Acsl3	Thy1	Hcn1	Pde1a	Rbp1	Nrn1	Icam5	Fxyd5	Camk4	Wdr96	Lgals1	Grip1	P2rx7	Rgs2	Gm10282	Tcf19	Mycl	Evi2a	Grid2	Slc30a10	Rasd1	Nrep	Mpeg1	Prnp	Cyyr1		Gprasp1	Cx3cl1							Chgb		Cd68	Cyth4		Mpped2	Ndc80	Lrrc42	Epb4.1l3	Lbh	Gjc1	Cpne4	Tgfb1i1	Serpinb1a	Lrba
Ncf1	Nkain4	Cck	Celf4	D3Bwg0562e	Pcolce2	Tmem163	Bcl11b	Epas1	Map1b	1110017D15Rik	Ptgs2	Celf4	Fcgr2b	Pld4	Cep170	Hmgb2	Cldn11	Trim59	Marcks	Car4	Zak	Tshz2	Btg2	Tspan7	Vim		Clstn3	Rasgrp1							Itpka		Emr1	Itgam		Hist1h2ap	Cenpk	Lims2	Desi1	Opcml	Sdc2	Fam81a	Phldb2	Cep85	Gtf2i
Ccrl2	Sox9	Cntnap2	Dnm1	Camk2a	Pom121	Ralgps2	Gabra4	Acvrl1	Ttc3	Efcab10	Cald1	Chd5	C1qa	Fgd2	Tacc2	Dlgap5	Pllp	Tmeff2	Grin3a	Adap2	Rbpms	Cx3cl1	Unc93b1	Sparcl1	Clic5		Nap1l3	Syt1							Syp		Pim1	Serinc3		Abracl	Tk1	Pus7	Slc12a2	Megf11	Nid1	Atp1a3	Rbpms2	B3gnt5	Rpl32
H3f3b	Gstm5	Ryr2	Cnksr2	Pgm2l1	Chchd10	Ttc3	Neurod2	Podxl	B3galt2	Ccdc78	Ifitm3	Serpini1	Lcp1	Zfhx3	Auts2	Cks2	Tuba1a	Cntn2	Nap1l5	Phldb2	Plac9b	Myt1l	Lair1	Mmd2	Tek		Pnma3	Trank1							Scn2b		Fcer1g	Srgap2		Nol4	Fbxo5	Rap2a	Map7	Tnr	Zic1	Grm7	Errfi1	Scd1	Emb
Hexb	Gpm6a	Atp2b1	Napb	Dgkg	Slc16a8	Rtn1	Erc2	Foxq1	Rbfox3	Dnah12	Zic1	Bex2	C1qb	Sparc	Ip6k2	Ect2	Sema4d	Ttll7	Erbb4	Mfge8	Ppp1r12a	6330403K07Rik	Tgfbr1	Kcnk1	Vwa1		A030009H04Rik	Spock3							Syt4		Ptprc	Hpgd		Ybx1	Cdca2	Frmd4a	Grb14	1700086L19Rik	Col1a2	Fam163b	Rbpms	Smim14	Selplg
Cd14	Gm3764	Chn1	Cck	Rprml	Fxyd1	Cd200	Grin2b	9430020K01Rik	Garnl3	Gm17455	Slc6a20a	Nsg2	Arhgap15	Sirpa	Tia1	Shcbp1	Pdcd4	Hapln2	Nrxn3	Ddit4l	Notch3	Nap1l5	Junb	Slc39a12	Foxq1		Tmem59l	Nsg2							Atp2b4		Lcp1	Csf3r		Rps5	Tacc3	Cldn11	Pdlim2	Mmp16	Ptn	Dnm1	Mcam	Cd79a	Gpr133
Cd86	Id4	Elmod1	3110035E14Rik	Syt1	Gpx8	Ly6h	Slc8a2	Erg	Dync1i1	Ccdc81	Itih5	Gnas	Plek	Lpcat2	Gm1673	Cdkn2c	Pcyt2	Ccp110	4833424O15Rik	Cp	Dstn	AI593442	Lpcat2	Eva1a	Epas1		Calb1	Gpr158							Snap25		Stk17b	Plxdc2		Fnbp1l	Ccnb2	Ptpre	Gjc2	Lrrtm4	Tm4sf1	Neurod2	Myl6	Fcrl1	Fyb
Hpgds	Fam213a	Camk2a	Pclo	Chgb	Atp2b3	Chgb	Nrgn	Myl12a	Gap43	Plac9b	Mxra8	Zwint	C1qc	Mpeg1	Gria2	Pdgfra	Mical3	Tppp3	Zcchc24	Cspg4	Sparcl1	Bex2	Ptgs1	Gpc5	Id1		Pnck	Gng7							Scn8a		Ftl1	Zfhx3		Rplp0	Mxd3	Prkcq	Tmod2	Dbi	Cspg4	Brinp1	Ano1	Mndal	Nsg2
Nlrp3	AW047730	Lrrn2	Pnma2	Sv2b	Rsph1	Msi2	Prkce	Sgms1	Arpp21	Stmnd1	Serpinh1	Atp1b1	Ctsh	Ccr5	Plxna2	Smc2	Tnr	Taldo1	Ncald	Eftud2	Serping1	Kcnma1	Egr1	AW047730	Emcn		Slc32a1	Atp2b2							Scn1b		Apoe	Pde3b		Nfib	Gm10282	Rasgef1b	Syt11	4833424O15Rik	Cp	Gabra1	Fxyd1	Trim7	Ccl5
Casp4	Sfxn5	Dok6	Ncdn	Ociad2	Slc31a1	Cdh4	Phyhip	Tek	Epha5	Wdr16	Foxc1	C530008M17Rik	Rgs2	Hpgd	2810055G20Rik	Ncapg	Lcorl	Syt11	Adarb2	Itga1	Npy1r	N28178	B2m	Btbd17	Id3		Stmn3	Sh2d5							Camkk2		Igfbp4	Cd37		Pfn2	Ect2	Zfp488	Edil3	Ampd3	Eftud2	Cnksr2	Cnn2	Btk	Satb1
Apbb1ip	Sdc4	Eno2	Meg3	Syp	Enpp2	Syt1	Rfx3	Cyyr1	Uchl1	Wdr63	Mrc2	Vsnl1	Lst1	Bin2	H3f3b	Cenpm	Plekha1	Rnf13	Zfp462	Sdc2	Lgals1	Car10	Cd68	Lsamp	Pcp4l1		Grik1	Fbxl16							Sult4a1		Alox5ap	Cfh		Gm14204	Smc4	Sema5a	Nkx6-2	Gria3	Car4	Arpp21	Pde5a	Blk	Pydc4
Fcgr3	Glul	6330403A02Rik	Stmn3	Stmn2	Fgd5	Kcnc2	Snap25	Lef1	Stxbp1	Gm867	Cxcl12	Copg2	Cd86	Tmsb4x	Ttc28	Smc4	Gipc1	Ywhaq	S100a1	Naalad2	Cnn2	Nsg2	P2ry13	Glul	Sdpr		Tmem179	Kcnip4							Sncb		Cyba	Tanc2		Rps26	Hmgn2	Dynll2	Efnb3	S100a16	Nr2f2	Cartpt	Gm13889	4930526L06Rik	Slfn1
4632428N05Rik	Slc6a1	Gpr22	Elmod1	Kif5c	Cd59a	Rbms3	Atp1b1	Sptbn1	Nrsn1	Lbp	Anxa2	Syngr3	H3f3b	Cd68	Snrpe	Lig1	Gal3st1	Enpp2	Dbi	Pde8b	Slc38a11	Akap5	Ier2	Fxyd1	Ly6e		Tmx4	Grin2b							Ncald		Rnasel	Susd3		Ptma	Gm26573	Ctnnal1	Csrp1	Grid2	Mylk	Syn1	Actn1	Tnfrsf13c	Cct6a
Tmem119	Cst3	Cpne7	Baiap2	Nptx1	Tmem237	Calm2	Syt7	Fn1	A030009H04Rik	Riiad1	Apod	Eno2	Laptm5	Susd3	Nr2f1	Kif22	Dynll2	Olig1	AI854517	Tm4sf1	Pde5a	Cpne5	Ccrl2	Gstm5	Acvrl1		Copg2	Grin1							Rasgef1a		Ccl6	Slco2b1		6330403K07Rik	Bub1	Abtb2	Pllp	Marcks	Tenc1	Tenm4	Plac9b	Ly86	Cd96
Pde3b	Ckb	Baiap2	6330403K07Rik	Cpne6	Cab39l	Hdgfrp3	Map1b	Cd34	A830010M20Rik	Spag17	Ccdc80	Dzank1	Emp3	AF251705	Nav1	C330027C09Rik	Aatk	Mapt	Megf11	Dlc1	Actn1	Dnm1	Irf8	Hepacam	Tm4sf1		Stmn2	Gria1							Pcsk2		Plek	Rgs2		Tuba1c	Hmgb3	Adamts4	Cpox	Ramp1	2019-09-04	Ptk2b	Tinagl1	Cmah	Fam105a
KCTD12	Tril	Prkcb	Syn2	Atp1b1	Cox8b	Ahi1	Enc1	Sema3c	Diras2	Foxj1	Fkbp7	Prkar1b	Grn	Mertk		C230088H06Rik	Plp1	Josd2	Ppapdc1a	Pitpnc1	Gper1	Lingo1	Il10ra	Abhd3	Spock2		Vat1l	Slc32a1							3110035E14Rik		Laptm5	Irf8		Stmn3	Kif15	Grlf1	Lpar1	Zdhhc2	Gucy1b3	Syt1	S100a11	Serinc3	Rab3ip
Runx1	Dclk1	Nrgn	Prkcg	Synj1	Ezr	Hsp90ab1	Scn3b	Nostrin	Pclo	Ankrd66	Id3	Zcchc18	Blvrb	Pycard		Cenph	Sh3bp4	Plekhb1	Phlda1	Sparcl1	Smtn	Frrs1l	Golm1	Nkain4	Slc9a3r2		St8sia3	Scn2a1							Bsn		Cd86	Ikzf1		Adarb2	Clspn	Gal3st1	Gpm6b	Etv4	Pde8b	Cntn4	Lgals1	Strbp	H2-K1
Ier2	Gpc5	Lrfn5	Snrpn	Map1b	Emb	Lingo2	Pcdh20	Nes	2019-09-03	Rsph10b	Rbms3	Erbb4	Ftl1	Srgap2		Hmgb3	Cd9	2019-09-07	Anks1b	Itgb1	Fxyd1	Gda	Rnase4	Fam213a	Nes		Map1b	Lrrc7							Stxbp1		Csf1r	Lair1		Pbx1	Kifc1	Mbp	Mapt	Ncald	Phldb2	Rph3a	Zak	Prkcb	Bzw2
Olfml3	Ednrb	Myt1l	Lingo1	Rtn1	Vat1l	Gprasp1	Tmem59l	Clic5	Eno2	2410004P03Rik	Zic4	Ndrg4	Rel	Grn		Incenp	Tmeff2	Bin1	Luzp2	Pde5a	Itgb1	Chn1	Nfkbid	Lfng	Myl12a		Rtn1	Meg3							Chga		Grn	Bin2		Rnd3	H2afx	Tuba1a	Tsc22d4	Sox10	Tnfaip1	Prkcg	0610007N19Rik	Clec2g	Arhgap9
Ctsz	Glud1	Scn8a	Sez6	Slitrk4	Dynlrb2	Cxcl12	Slc7a14	Tpm4	2900011O08Rik	Bbox1	Fosb	Pnmal2	Emr1	Epb4.1l2		Bub1	Mag	App	Lbh	Ebf1	Nr4a1	Zwint	Ier3	Plcd4	Sgms1		Dzank1	Phactr1							Prkce		Fam46a	Elmo1		Hdac2	H2afz	Pfn2	Plekhb1	Tmem176b	Ackr3	Slc3a1	Rgs5	Eml4
Il10ra	Ldhb	Cntnap5c	Ppp3cb	Ina	Acaa2	Kcnb2	Kcnj3	Klf4	Ina	1700007K13Rik	Aldh1a1	Pcdha2	Apobec1	Entpd1		Ncapd2	Sox10	Gjc3	Ppfibp1	Arhgap6	S1pr3	Atp6v1g2	Sparc	Ckb	Sox17		Wdr6	Gnal							Epha4		Nfkbiz	Tmsb4x		Mllt11	Dlx1	S100b	Hapln2	Nrxn1	Adap2	Syn2	Gucy1a3	Abhd17b
Nav3	Thrsp	Rasgrf1	Pcdha2	Eef1a2	Sema3b	Ccl27a	Prox1	Vim	Phactr1	Spef2	Arhgap29	Tspyl4	Bmp2	Pde3b		Cacng4	Frmd4a	Pdlim2	Gpr37l1	2019-09-04	Rgs5	Ldb2	Pld4	Dio2	Car4		Celf4	Chn1							AI593442		Ctsb	Ifngr1		Prdx2	Ccnd2	Tubb4a	Gjc3	Zcchc24	Dock6	Snca	Hspb1	Cxcr5
Gtf2ird2	Slc39a12	Cpne6	Synj1	Ywhag	Pcp4l1	Thsd7b	Ncdn	Slc7a5	Prkcb	Armc4	F3	Ube3a	Myo7a	Ctsz		Lmnb1	Sox2ot	Edil3	Il1rapl1	Nr2f2	Mfge8	Gap43	AF251705	Cspg5	Itih5		Syngr3	Gap43							Arf3		Tmsb4x	Rassf3		Elavl3	Cenph	Ugt8a	Stmn1	Nap1l5	Arhgap29	Prkce	Dstn	Unc93b1
Sparc	Asrgl1	Ociad2	Camkv	Kcnip2	Nme5	Lsamp	Camk2a	Cd93	Zcchc18	Gm16201	Vcam1	Sncb	Ehd4	Slco2b1		2700094K13Rik	Lrrtm2	Psat1	Grm5	Col4a1	Lbh	Ppp3ca	Rnf19b	Nrxn1	Eng		Ttc3	Eno2							Slc8a2		Ehd4	Cyba		Gm2000	2700094K13Rik	Epb4.1l2	Tmeff2	Ugdh	Gpc3	Scn8a	Pcp4l1	Samd9l
Rnase4	Rorb	Kcnd2	Atp1a3	Mllt11	Perp	Dkk3	Dgat2	Rgs5	Kcnma1	Lrrc23	Tmem64	Gng3	Atf3	Mef2c		Tk1	Fa2h	Gpm6b	Opcml	2019-09-07	Cdc42ep3	Uchl1	Itgb5	Luzp2	Abcg2		Pclo	Alcam							Napb		Ifitm2	Fgd2		Gm1673	Lig1	Tns3	Fez1	S100b	Tagln2	Vsnl1	Nr2f2	Pxk
Lair1	Ptplb	Sv2b	D3Bwg0562e	Nsf	Fam81a	Pdzd2	Ppp3ca	Ccdc141	Dzank1	Gm11992	Cd302	Galntl6	Ccl6	Tbxas1		Spdl1	Marcks	Rtn4	S100a16	Itm2b	Hspb1	Hpca	Ltc4s	Slc38a3	Crip1		Atp1a3	Lamp5							Cadm3		B2m	Sirpa		Pbx3	Gm26623	Mag	Pls1	Cyp2j6	Lamc1	Nptx1	Sparcl1	Hvcn1
B2m	Phkg1	Nell1	Prkar1b	Lrrn2	Apoo-ps	Ap1s2	Nefm	Palmd	Resp18	Pih1d2	Ptn	Ly6h	Cd83	Rnaset2a		Mybl1	Tubb4a	Rnf7	Gria4	Arhgap29	Filip1	Ina	Ier5	Phkg1	Anxa2		Ina	Gabrb3							Fbxw7		Sepp1	Grn		Gad2	Dut	Sh3bp4	Cmtm5	Tacc2	Itga1	Celf4	Rasd1	Zcchc11
Jun	Lsamp	Gria2	Serpini1	Rasgrf1	Ndufa1	Utrn	Itpka	Utrn	Camkv	Plac9a		Ttc3	Ptpn18	Lcp1		Rrm1	Mbp	Kif1b	Ugdh	Ifitm3	Prkcdbp	Fut9	Spi1	Naaa	Tmem204		Gng3	Snca							Pter		H2-D1	Epb4.1l2		Ezh2	Dlx2	Ablim2	Rnf7	Fam155a	Pitpnc1	Kcnj4	Atf5	Brwd1
Nfkbid	Dbi	Mpped1	Pter	Cpne4	Hes1	Fat3	Baiap2	Ahnak	Ckmt1	Fank1		Pak3	C5ar1	Cfh		Fbxo5	Gsto1	Kcna1	Fxyd6	Rbms1	Parm1	Cdr1	Rgs1	Dbi	Klf4		Syt5	St8sia3							Adcy1		Fosb	Cd84		Rpl11	Cenpw	Plp1	S1pr5	Gng3	Pald1	Kalrn	Itgb1	Parp1
Inpp5d	Tubb2b	Cadps2	Nefm	Mmd	Ttr	Nfib	Sema5a	Paqr5	Unc80	Dnaic1		Gm26593	H2-K1	Ldlrad4		D17H6S56E-5	Bcar1	Slc24a2	Sema3d		Tns1	Pnmal2	Ppp1r15a	Malat1	Sema3c		Tro	Pde7b							Atp2b2		Cd83	Mef2a		Ddah2	Mex3a	Sox10	Trim59	Rprm	Limd1	D3Bwg0562e	Crim1	Rabgap1l
Ptprc	Prnp	Cx3cl1	Ptprn	Icam5	Stk39	Gria1	Jph1	Arhgap29	Olfm1	Vwa3a		Slc12a5	Aif1	Abhd12		Bub1b	Ick	Ptprd	Ampd3		Gucy1a3	Calm1	Dusp1	Asrgl1	Lsr		Atp1b1	Car11							Hpcal4		Bst2	Lcp1		Meg3	Mfap2	Parvb	Rnf13	Cd9	Ifitm3	Ppp2r2c	Lbh	Stap1
Blnk	Cnn3	Rasgef1a	Uchl1	Syt4	Slc22a17	Kif5c	Syt1	Rundc3b	Atp1a3	Gm973		Tceal6	H2-D1	F11r		Knstrn	Marcksl1	Lpar1	Spry1		Nr2f2	Nefm	Socs3	Sfxn5	Tsc22d1		Gnaz	Ryr3							Cx3cl1		Fyb	Mylip		Rps9	Hjurp	Trio	Ywhaq	Gpr37l1	Sparcl1	Map9	Foxc1	Serp1
Plxdc2	Fxyd1	Ryr3	Syt5	Rasgef1a	Fhad1	Sgip1	Plxna4	H2-D1	Ttc9b	Lrrc48		Mllt11	Nfkbiz	Tanc2		Gm10282	Pfn2	Pde4b	Cntn4		Syne2	Ppp3r1	Jun	Ntm	Arl4a		Eno2	Ppp1r1a							Chst1		C5ar1	Rnaset2a		Ccdc88a	Ncapd2	Spsb1	Slc24a2	Nlgn1	Itm2b	Cplx2	Gper1	Smap2
Mef2c	Hbegf	Camk2b	Caly	Spink8	Cyb561	Nfix	Lgi1	B2m	Bex2	Kif9		BC005764	Klf6	Ikzf1		Clspn	Dhcr24	Anln	Ctnna2		Sh3bgrl	Map1b	Grn	Id2	Icam2		Snap47	Pclo							Pde1a		Myo7a	Ctsz		Cdk4	Zwilch	Cd9	Lgi3	Cav1	Arhgdib	Gpr158	Higd1b	Nap1l1
C5ar1	Serpine2	Epha5	Vgf	Pcdha2	Slc4a10	Gria4	Epha4	Tmem204	Mllt11	Mns1		Ndn	Fcgr3	Ltc4s		Tyms	Peli1	Gstp1	Dpysl3		Mgp	Satb1	Alox5ap	Dbx2	Slc7a5		Vsnl1	Dgkb							Uchl1		Fcgr3	Pag1		Hnrnpa2b1	Ezh2	Panx1	Litaf	Kank1	Mcam	Snap25	Kank2	Snx5
Lcp1	Eva1a	Kalrn	Rab3a	Gdap1	Atp1b1	Psip1	Gabra1	Ltbp4	Sez6	Calml4		Rbms3	Nlrp3	Nckap1l		Gas2l3	St18	Tmod2	Cadm2		Btg2	Satb2	Nlrp3	Aldh1l1	Paqr5		Scg5	Ppp3ca							Fam81a		Dusp1	Entpd1		Rps14	Rad51ap1	Itpr2	Slc44a1	Fxyd6	Arhgap42	Atp6v1g2	Itga7	Cd24a
Ptgs1	Sox2	Gabra2	Cadps2	Ncdn	Pon3	Fam155a	Pnmal2	Gpcpd1	Rab26	Tekt1		Hap1	C3ar1	Lyn		Tmpo	Sox8	Pcdh9	Zeb1		Lmna	Ube3a	Cyth4	Slc27a1	Tie1		Gnl3l	Rian							Hpca		Klf6	Ccr5		Vcan	Gmnn	Peli1	Agpat4	Sox8	Ebf1	Bcl11b	Sorbs2	Itsn2
Tmsb4x	2610017I09Rik	Lmo7	Grm5	Syn1	Rsph9	Mapk8ip2	Atp1a3	Ebf1	Rasgef1a	Ccdc162		Elavl4	Ncf2	Plxdc2		Ncapg2	Deb1	Map7	Fos		Lamb2	Nap1l2	Rgs2	Lxn	Tagln2		Nsg2	Kcnab1							Gabrg2		Ccl3	Ncf1		Ttc3	Nasp	Deb1	Ppp1r14a	Lsamp	Ifitm2	Rab3c	Ppp1r12a	Snx30
Gem	Id2	Zfp804a	Chd5	Arf3	Arl6ip1		Kalrn	Cd59a	Mapk8	Mycbpap		Rtn1	Ctsb	Ivns1abp		Gm26623	Map1b	Gnai1	E130309F12Rik		Nudt4	1110008P14Rik	Bin2	Rorb	Hspb1		Unc80	Rgs7bp							Rgs7bp		Zfp36	Fcgr1		Snrpg	Cdca7	Map1b	Fnbp1	Myt1	2019-09-11	Hspa12a	Rock1	St6gal1
Actb	Dbx2	Wbscr17	Unc80	Rab6b	Atp5g1		Nptxr	Tspan13	Neto2	Capsl		Slc6a1	Fyb	Marcks		Rfc3	Elavl3	St18	Fosb		Arhgef7	Hecw1	Tgif1	Slc15a2	Thbd		Snrpn	Tesc							Car10		Bcl2a1b	Mef2c		Celf4	Mdk	Sh3rf1	Josd2	Mfsd2a	Plat	Csmd1	Nudt4	Rnase6
Srgn	Npas3	Napb	Gap43	Celsr2	Acad8		Camkk1	Arl4a	Chd5	Spata17		Rab3a	Fcrls	Man2b1		Atad2	Map1a	Gjc2	Gria3		Id3	Cacng3	Gpr84	Gabrb1	H2-D1		Dcaf12l1	Sez6							Rab3a		P2rx7	Nckap1l		H2afy2	Knstrn	Chst8	Prr5l	Lrrn1	Ece1	Chn1	Uba2	H2-DMa
Gadd45b	Abhd3	Rab3c	Camk2b	Wasf1	Cul4b		Rab40b	Eogt	Pacsin1	Mlf1		Rasgrf2	Bst2	Ptprc		Hjurp	Lims2	Sox2ot	Pcdh11x		Dgkb	Cacna2d1	Cyba	Id4	Ltbp4		Cacna2d2	Nefl							Dkk3		Gpx1	Lyn		Bzw2	Hn1	Mical3	Sez6l2	Anks1b	Itgb1	A830039N20Rik	Cog7	Sh3bp5
Irf8	Mgll	Khdrbs3	Chn1	Cplx2	Mcee		2019-09-03	Cgnl1	Prkce	Wdr65		Syn2	Gpx1	Ifngr1		Hmgn2	Sulf2	Tsc22d4	Gm2a		Prss23	Scg5	Cd37	Hes5	Crip2		Sncb	Kif17							Gda		H3f3b	Marcks		Snrpe	Dtl	Bcar1	Tppp3	Rpl13	Lin7a	Nsf	Smtn	Pyhin1
Lpcat2	Lix1	Pou3f1	Rtn1	Cyfip2	Gigyf2		Lingo2	Sepp1	Fut9	Syt10		Stxbp1	Nrros	Il6ra		Hn1	Shisa4	Ypel2	Dpyd		Apold1	Kif5c	Ptpn6	Dclk1	Ifitm2		Tmem255a	Celf4							Slc6a17		Vamp8	Mertk		Eif4g2	Cdkn2c	Cyfip2	Efhd1	Grin3a	Plxdc2	Elavl4	Ptp4a3	Gm8369
Hspa5	Timp4	Cttnbp2	Kcnj3	Scn2b	Mia		Syp	Slc22a8	Atp2b1	Pifo		A230006K03Rik	Runx1	Ddx26b		Fabp7	Idh1	Slc12a2	Gria2		Synm	Slc30a3	Fos	Grin2c	Prom1		Ckmt1	Bex2							Grin2b		Rgs10	Fam102b		Nfix	Rrm1	Marcks	Pla2g16	Rap1gap	2019-09-07	Cadps	Nos1ap	Gimap6
Fos	Mras	Fam131a	Cdk5r1	Cdk5r1	Gas6		Syt5	Cdh5	Gabra5	Nme5		A330076H08Rik	Rnase4	B2m		Ezh2	Srpk3	S1pr5	Arl2bp		Tsc22d1	Plcxd2	H2-K1	Rgs20	Tspan13		Fxyd6	Scn3a							Nov		Nrros	Numb		Mtss1	Tmpo	Scrg1	Serpinb1a	Ehd3	Phlda1	Ppm1l	Mfge8	Napsa
Ppp1r15a	Sc4mol	St6galnac5	Nell2	Chn1	Kcnk1		Atp2b1	Slc39a10	Gabra1	Gm872		Atcay	A430104N18Rik	Slc8a1		Clgn	Olig2	Cpox	Ppp2r2b		Actb	Kcnh7	Mcl1	Glud1	Slc6a6		Rab3a	Jakmip1							Ttc3		Pmaip1	Scamp2		Tcf4	Tubb5	Lgi3	Arsg	Gjc3	Ctdspl	Gap43	Mob2	Ctsh
Mcl1	Slc25a18	Kcnab2	Atp1b1	Rbfox3	Fam161a		Rtn1	Crip2	Thy1	Armc3		6330403K07Rik	Rgs10	Myo1f		Ptprz1	Pcdh7	Fnbp1	Galnt13		Actn4	Sv2b	Txnip	Serpine2	Slc22a8		Mapk8ip2	Galnt13							Ppp3r1		Fth1	Blnk		Synpr	Gm6104	Sema4d	Gltp	Il1rap		Prkar1b	Prkcdbp	Rel
Rgs2	Fjx1	Ptk2b	Map1b	St6galnac5	Slc29a4		Fam19a2	Ets1	A230006K03Rik	Ttc9		Nyap2	Sepp1	Elmo1		H2afz	Fnta	Mapk8ip1	Rev3l		Nbl1	Clstn2	Ubc	Oaf	Sema7a		Hook1	Rarb							Copg2		Rps29	Spi1		Rpl32	Atad2	Bcan	Slc48a1	Car8		Syt4	Limd1	Bin1
Srgap2	Lcat	Cacna2d1	Caln1	Camta1	Mlf1		Chgb	Ptrf	Dnm1	Efcab1		Cit	Unc93b1	Irf8		Plk4	Tppp	Sec11c	Nav1		Fos	Eno2	Apbb1ip	Tsc22d4	Cd59a		A230006K03Rik	Gda							Syn1		Sdc4	Havcr2		Nasp	Incenp	Nkx2-2	Tmem125	Ppfibp1		Fhl2	Utrn	Arpc5l
Ctsc	S100b	Sorcs3	Cx3cl1	Vsnl1	Trpv4		Iqgap2	Atp10a	Ahi1	Ccdc40		Scg5	Ccl3	Mef2a		Rtkn2	Ubl3	Tmem151a	Rgcc		Crim1	Cdk5r1	Gem	Slc6a1	B2m		2900011O08Rik	Syt5							Mef2c		Ifitm3	Mlxipl		Hmgn1	Ascl1	Sox4	Tprn	Ptpre		Creg2	2010111I01Rik	Dok3
Unc93b1	Plcd4	Lmo3	Dgkg	Ppm1e	Tgfb2		Dgkh	Uaca	Enc1	Ttll8		Cacna1b	Txnip	Fermt3		Gm26573	Jam3	Agpat4	Gpc5		Ppp1r15a	Sgtb	Gadd45b	Fabp7	Eogt		Pcsk1n	Prkcb							Syn2		Snx2	Il6ra		Hmgn2	Ccdc18	Zfp579	2810468N07Rik	Nnat		Snhg11	Sh3bgrl	A630001G21Rik
Pld4	Ezr	Gabra1	Syp	Fbxw7	Mdh1		Thy1	Gata2	Opcml	Dnah6		Ptprn2	Rps29	Mylip		Mcm7	Jmy	Litaf	Pllp		Gjc1	Dpp10	H3f3b	Ptn	Tinagl1		Syn2	Fgf14							Ppp2r2c		Hexa	F11r		Cdk5r1	H2afv	Aatk	Atp1b3	Npas3		Kcnip4	Prelp	Ddx5
Ubc	Ncan	Ppp4r4	Cyfip2	Ttc3	Cgnl1		Gabra5	Itih5	Baiap2	Ak9		A930011O12Rik	Cd53	Fyb		Gm10184	Vcan	Cers2	S100b		Ppp1r12b	Thy1	Cd86	Smpdl3a	AW112010		L1cam	Kcnq5							1110008P14Rik		Tnfaip3	Smap2		Elavl4	Kif11	Dgat2	Tmem151a	AI854517		Grin2b	Notch3	Fam149b
Cd180	Prex2	Robo2	Hpcal4	Gria2	Ggh		Kctd4	C130074G19Rik	Ptprn2	Ccdc37		Tmem59l	Arhgdib	Actb		Ascl1	Tspan15	Ppp1r16b	Kank1		Ltbp1	Gabrg2	Slc2a5	Trpm3	Fcgrt		Faim2	Rxrg							Ndrg4		Rps14	Fermt3		Sh3bgrl	Cd24a	Ick	Olig1	Spry1		Ndrg4	Ebf1	Grap
Socs3	Dio2	Wfs1	Fbxw7	Cx3cl1	Rapgef1		Stxbp6	Hspa12b	Ube3a	Ppil6		Ahi1	Csf1r	Adap2		Ska2	Olig1	Gjb1	Tspan3		Ebf1	Pclo	Casp4	Ptplb	Srgn		Nap1l2	Ncdn							Nefl			Hck		Gm3764	Gm10184	Sox8	2019-09-07	Rpl13-ps3		Syt5	Lhfp	4930523C07Rik
H2-K1	Hepacam	Ppfia2	Tenm2	Atp6v1a	Smpdl3a		Nsf	Ushbp1	Cyfip2	Lrriq1		Uchl1	Birc3	Fam102b		Mcm6	S100b	Secisbp2l	Pcsk1n		Ccnd2	Meis2	Rassf3	Slc9a3r1	Net1		Prkar1b	Matk							Calm1			Pycard		Chd3	Tmcc1	Phyhipl	Bin1	Tspan3		Syt7	4930523C07Rik	Ptma
Ltc4s	Aldh1l1	Grin1	Lrrn2	Grm5	Baz2b		Clstn2	Tfrc	Stxbp5l	Smim5		Ngfrap1	Zfp36	Ctsl		Dnmt1	Prickle1	Arpc1a	Rpl13		Foxc1	Resp18	Ccr5	Pygb	Nfkbia		Kif5c	Clip4							Ina			KCTD12		Ctnna2	Pou3f2	Gltp	Psat1	Pdzrn4		Golga7b	Csrp2	Ltb
Ptprj	Lxn	Kcnc2	Olfm1	Lingo1	Vamp8		Camkv	BC028528	Tmem130	Ccdc65		Gaa	Ccl4	Numb		Tubb5	Rasgef1b	Rcan2	Chl1		Klf2	Tmem59l	Hpgd	Fjx1	Fas		Elavl2	Thy1							Tmem59l			Rps6ka1		Ilf2	Hmgn5	Elovl7	Taldo1	Spon1		Pgm2l1	Ltbp1	Ptprcap
Btg1	Scrg1	Ppp3ca	Nsg2	Slc6a17	Phactr2		Frrs1l	Fzd6	Sult4a1	Tmem107		Sv2a	Grik3	Ecscr		Tmcc1	Qk	Qk	Tmem176b		Susd5	Mllt11	C5ar1	Dtna	Anxa3		Htr2c	Cacna1e							Snhg11			Itm2b		Tshz1	Tuba1b	Abhd17b	Traf5	E130309F12Rik		Rasgef1a	Atp2b4	Trim34a
Dusp1	Appl2	Disp2	Mllt11	Ywhah	Ahcyl2		Sncb	Anxa2	Syp	Gm14964		Gprasp1	Lgmn	Cd84		Dut	A330102I10Rik	Rhog	Spon1		Net1	Scg2	Epb4.1l2	Nr2e1	Sepp1		Slc6a15	Rbfox3							Gpm6a			Plcl2		2019-09-03	Hirip3	Sulf2	Cers2	Arl2bp		Frrs1l	Filip1	Mrps28
Tanc2	Phka1	Unc80	Pak3	Ppp3cb	Cd59b		Gpr22	Heg1	Syngr3	Efhb		Ywhag	Rps9	Scamp2		H2afv	Lsamp	Pla2g16	Zdhhc2		2010111I01Rik	Bex1	Rnaset2a	Ddhd1	Cyr61		Gng2	Map1b							Rgs4			Man2b1		4930506M07Rik	Gm17750	Cdh20	2019-09-08	Zfp462		Pnma2	Cdkn1c	Ezr
Mertk	Ramp1	Nrxn3	Rbfox1	Enc1	Pcp4		Pgbd5	Crip1	Fam155a	Maats1		Tro	Rasgef1b	Zfp710		Dek	Arpc1b	Galnt6	Rpl13-ps3		Rgs7bp	Cacng2	Susd3	Slc7a10	BC028528		Syp	Copg2							Zfp365			Ppcdc		C130071C03Rik	Prim1	Srpk3	Degs1	Gpc5		Ppp1r1a	Tns1
Sirpa	Slc9a3r1	Snap25	Slc12a5	Epha4	Dpcd		Pcdh8	Cd200	Efr3a	Gm216		Disp2	Cd84	Ctsc		Sntg1	Thra	Erbb2ip	Nova1		Plcb4	Prkce	Skil	Cd63	Gata2		Gabra3	A230006K03Rik							Atp1b1			Sall1		Rbfox2	Ddah2	Klhl5	Carhsp1	Tpm1		6430548M08Rik	Hes1
Epb4.1l2	Nrxn1	2010300C02Rik	Nsf	Clstn1	Gsta4		Rnf112	Cyr61	Gng3	Spa17		Rims1	Pld4	Alox5ap		Rbbp8	Agpat4	Dusp26	Gjc3		Calm2	Cacnb4	Sat1	Il18	Gsta4		Arhgdig	Ppp1r9a							Rbfox3			Tbxas1		Soga3	Igfbpl1	Camsap2	Tmbim1	Fip1l1		Camk2b	Ccnd2
Ikzf1	Slc7a10	Nlgn1	Rprml	Vamp2	Elovl7		Grik2	AU021092	Caln1	Adamts20		Podxl2	Slc9a9	Hexa		Dnajc9	Nav1	Arsg	Marcksl1		Lhfp	Atp1a3	Lcp1	Agpat5	Sparc		Mapk10	Gabra4							Nsf			Ctsb		Tsn	Anp32e	Opcml	Rhog	Fam212b		Gabrb3	Crip2
Golm1	Ntm	Epha7	Sertm1	Atp2b1	Fras1		Vstm2a	Ece1	Rprml	1700003M02Rik		Frmpd4	Fth1	Cyba		Fxyd6	Atp6v0a2	Carhsp1	Lsamp		Rock1	Myo5a	Dennd4a	Ramp1	Myl12b		Magee1	Ptk2b							Mapk10			Fyb		Fubp1	Arx	Fam13c	Evi2a	Bcas1		Slc12a5	Actb
Ier3	Naaa	Lrrtm1	Frrs1l	Ppp3ca	Slc16a2		Cacna1e	Sp100	Bex1	Ccdc30		Unc5d	Mcl1	Slc7a8		Tbc1d31	Abhd17b	Slain1	Mfsd2a		Higd1b	Arhgap32	Inpp5d	Vcam1	Slc39a10		Stxbp1	Grm7							Erc2			Adap2		Csnk1e	Abracl	Fa2h	Nmral1	Nav1		Cdk5r1	Ppp1r12b
P2ry13	Slc27a1	Olfm1	Osbpl6	Clstn2	Prdm16		Rogdi	Tagln2	Map7d2	Ccdc108		Rit2	Rplp1	Sall1		Ncapd3	Prkcq	Slc44a1	Tuba1a		Kank2	Cyfip2	Il6ra	Mgll	Robo4		Map7d2	C2cd2l							Cplx2			Hexa		Set	Stmn1	Zfp365	Neat1	E130114P18Rik		Sgtb	Synm
Samsn1	Msi2	Kcnq2	Gria2	Ptk2b	Ociad2		Btbd3	Prom1	Cx3cl1	Wdr93		Snap91	Dusp1	Rrbp1		Prim1	Slc35b2	Serpinb1a	Lrrn1		Utrn	Atp2b1	Csf3r	Ldhb	Hspa12b		Rasgrf1	Atp2b1							Rab6b			Txnip		Kat6b	Ccdc34	Tm7sf3	Gamt	Luzp2		Stx1a	Syne2
Zfhx3	Slc15a2	Creg2	Parm1	Cmip	Ifi27		Bex2	Gimap6	Fbxw7	Fam154b		Gabra3	Nfkbia	Ctsb		Anp32e	Efcab14	Prr5l	Dner		Timp3	Zcchc18	Sgk1	Appl2	Tmsb4x		Atp6v1b2	Gabrd							Arhgap32			Arrb2		Sez6	Elavl4	Gnb4	Sirt2	Itgb8		Adarb1	Ackr3
Cdk6	Ddhd1	Sertm1	Copg2	Snrpn	9130019P16Rik		Pter	Mecom	Neurod2	Hydin		Tmem179	Tpd52	Gfm2		Ran	Serinc5	2810468N07Rik	Pid1		Atp2b4	Kalrn	Tmsb4x	Itih3	Ocln		Snap25	Ablim2							Rasgrp1			Cyfip1		Hnrnph1	Rbbp8	Vcan	Jam3	Cpq		Hpcal4	Plcb4
Nfkb1	Gpm6b	Fam155a	Ar	Slc17a7	Hist1h1c		Scn2a1	Net1	Ywhah	Ttc25		Ptprn	Ly6e	KCTD12		Ugdh	Zdhhc14	Pak1	Sox10		Pls3	Bcl11a	Rhob	Tubb2b	Utrn		Pak3	Atp6v1g2							Kcnma1			Gns		H2afv	Dnajc9	Lsamp	Secisbp2l	Rev3l		Arhgap32
Cd68	Cd63	5730522E02Rik	Slc4a10	Lpl	Ctnnal1		Rgs7bp	Itga1	Sv2b	Drc1		Syp	Mef2c	Gns		Tex30	Klhl5	Jam3	Gtl3		Sorbs1	Scn1a	Zfp36l1	Pmm1	Ccm2l		Tspyl4	Tceal6							Rbfox1			Cd14		Acin1	Cbx3	Agpat4	Endod1	Pcsk1n		Stxbp1
Abhd12	Il18	Brinp1	Ensa	Pfn2	Hs6st2		Grm5	Rbms1	Tenm2	Dnaic2		Maged1	Snx2	Ncf1		Cenpj	Sox2	Adssl1	Fip1l1		Arhgap29	Basp1	Serinc3	Cadm1	Ndrg1		Ywhag	Atp1b1							Herc3			Pla2g15		Top2b	Ska2	Cyp2j6	1700047I17Rik2	Ccdc173		Camkk2
Bin2	Tubb2a	Hivep2	Ak5	Tubb2a	Pgrmc1		Slit1	Ptprg	Nsf	Dnah11		Grin2b	Nfe2l2	Dock8		Sae1	Snx30	4930511M06Rik	Ncan		Zc2hc1a	Cplx2	Cd84	Enho	Arhgap29		Chd5	Gria3							Ywhag			St3gal6		Ptbp2	Ran	Slc35b2	Cdc42ep2	Igfbp3		Cadm3
Cd84	Dtna	Dgkg	Kcnma1	Zbtb18	Ldhb		Syt13	Akap12	Grm5	Dsg2		Cend1	Nrp1	Maml3		Ddah2	Ppp1r16b	Sez6l2	1700025G04Rik		Ppp1r12c	Atp6v1d	Ctsz	Gpm6a	H2-K1		Habp4	Arf3							Slc7a14			Chd9		Hnrnpr	G2e3	Glrb	Ypel2	Fosb		Gpr22
Neurl3	Ptn	Neurod2	Ly6h	Prkcg	Prelp		Ntng1	Tns1	Snrpn	Ascc1		Tubb2a	Fam46a	Csmd3		Usp1	Pim3	Tmbim1	Srgap1		Cav1	Epha4	Ncf2	2610017I09Rik	Atox1		Nefl	Sgcz							Syngr1			Cd86		Dock7	Pcna	Tspan15	Slain1	2019-03-01		Icam5
AF251705	Luzp2	Nr3c2	Nnat	Bex1	Cox6b2		Celf2	Thbd	Frrs1l	Kif6		Syt5	Btg2	0610040J01Rik		Mcm3	Ctnnal1	2019-09-08	Ntrk3		Pdgfa	Rian	Cebpa	Trim9	Cav1		Map9	Celf2							Cobl			Actb		Matr3	Dek	Dhcr24	Kif1b	Dpysl3		Fam155a
Alox5ap	Pmm1	Ptprn	Ywhag	Ptprn	Ndufa11		Scn3a	Igf1r	Cpne4	1700040L02Rik		Mblac2	Clic1	Anxa3		Cenpv	Grlf1	1700047I17Rik2	Ctnnd2		Bnip2	Dkk3	Ptpn18	Elovl5	Sp100		Scn2a1	Uchl1							3110047P20Rik			Creg1		Bcl11b	Hat1	Pllp	Pde4b	Slc22a17		Nell1
Itgb5	Paqr8	Crmp1	Prkce	Cadm3	Maob		Rab3a	Myl12b	Rgs7bp	Iqub		Pdxp	Fosb	Tgfbr2		Rad21	Dpysl4	Hsp90aa1	Nrxn2		Uaca	Sult4a1	Slco2b1	Npas3	Akap12		Frrs1l	Foxp1							Slc12a5			Tgfbr2		Cdkn1b	Anp32b	Olig1	Adssl1	Lphn3		Plcxd2
Ccr5	Chchd10	Ube3a	Celf5	Atp6v1b2	Rbm47		Wbscr17	Robo4	Mpped1	Vwa5b1		Scrn1	Zfp36l1	St3gal6		Tipin	Abtb2	Tppp	Nnat			Snap91	H2-D1	Hrsp12	Afap1l1		Elavl4	Ube3a							Atp1a3			Ddx26b		Ptprs	Hmgn1	Stam	Sccpdh	Ppp2r2b		Map1b
Grn	Gabrb1	Sorl1	Gdap1	Pcsk2	Sfrp1		Cttnbp2	H2-K1	Hook1	Spef1		Cacna2d2	Myo5a	Pag1		Ccdc34	Rell1	Ttyh2	Lrp1b			Ywhag	Ptprc	Pbxip1	Kank3		Snx10	Phyhip							Svop			Il10ra		Basp1	Dnmt1	Qk	Qk	Maged1		Unc80
Fyb	Ddah1	Atp1a3	Rian	Gap43	Npr3		Cnksr2	Rasip1	Ywhag	Zbbx		Dlgap2		Itm2b		Pcna	Golga7	Sirt2	Csnk2a2			Tmem130	Neurl3	Prex2	Gpcpd1		Pja1	Itpr1							Arpp21			Ctsc		Nedd4	Dlx6os1	Cdv3	Dusp26	Sez6l		Rims1
Entpd1	Gm26704	Celf2	Tmem59l	Lynx1	Nsg2		Thsd7a	Col4a1	Kifap3	Dnah5		Serp2		Hck		Ranbp1	Rictor	Nkx6-2	Lphn3			D430041D05Rik	Ctsb	Rcn2	Rgcc		Syt1	Ngef							Gria3			Bmp2k		Celf2	Nol4	Jam3	Aatk	1700025G04Rik		Cdk5r2
Rassf3	Ahcyl1	Gda	Gabra3	Stard5	Hist1h2bc		Pitpnm2	Tie1	Rab6b	1700088E04Rik		Pld3		Blnk		Rlbp1	Dbndd2	Mbnl2	Bcas1			Ncald	Pde3b	Fgfr1	Fzd6		Cnih2	AI593442							Cacna2d1			Rplp1			2610017I09Rik	Olig2	Mapk8ip1	Tmem132b		Lrp11
Marcks	Trim9	Plk2	Elavl4	Syngr1	Prdx5		Gabrb3	Slc40a1	Ly6h	Spag6		Ina		Cttnbp2nl		Ubald2	Arpc1a	Degs1	Gap43			Gabra4	Fosb	Gpm6b	Atp10a		Got1	Kcnd2							Cdk5r1			Cmtm6			Pcna-ps2	Susd4	Mbnl2	Cdh13		B4galt6
Ctsl	Scara3	Galnt9	Bex2	Shisa6	Atp6v0e		Orai2	Slc7a1	Runx1t1	T2		C1qtnf4		Nav2		Nucks1	Itpr2	Endod1	Calcrl			Rgs17	Arl4c	Fut9	Cmtm8		Rab3c	Foxp2							Sorl1			Snx5			Diap3	Gramd3	Arpc1a	Ntrk3		Ppp3cb
Hpgd	Farp1	Pgm2l1	Prkcb	Tmem179	Bphl		Gabbr2	Golim4	Celf2	Nppc		Epm2aip1		Txnip		Hnrnpu	Dynll1	Tnni1	Npas3			Ppp3cb	Blnk	Vegfa	Heg1		Tenm2	Lmo7							Lphn1			Ctsl			Tmsb10	Fmnl2	Sox2ot	Sh3d19		Grem2
Ldlrad4	Rcn2	Vsnl1	Chl1	Nt5dc3	Ephx1		F730043M19Rik	Timp3	Srrm3	Cetn4		Kcnh7		Samsn1			Clip3	Arhgef10	Pcdh7			Cadm3	Cfh	Ncan	Gng11		Camk2n2	Syndig1							Cap2			Rrbp1			Tubb3	Efcab14	Smco3	Snx1		Pcdha2
Rel	Bmpr1b	Ncdn	Timp2	Orai2	Slc4a2		Zfpm2	Cav1	Tshz2	Fbln7		Ugcg		Smap2			Pus7	Pls1	Tpm1			Rab6b	Btg1	Maob	Ushbp1		Cend1	Rab3c							Lrp11			Rasgrp3			Hmgb1	St18	Arhgef10	Pid1		Atp2b2
Birc3	Kcnk1	Kcnj3	Gpr123	L1cam	Ndufa4		Lrp11	Nfkbia	Galnt9	Dnah9		Fabp3		Cd164			4930402H24Rik	Tprn	Rtn1			Nsf	Fgd2	Lix1	Cav2		Atp6v1g2	Celf5							Rab6a			Slc29a3			Rad21	Ncam2	Lamp1	Zeb1		Rprm
Csf3r	Gnao1	Itga8	Ahi1	Grin1	Hint2		Add2	Anxa3	St3gal5	Cdkl4				Tmcc3			Acsl3	Plekha1	Pdzrn4			2900011O08Rik	Maf	Slc1a4	Gbp3		Gabra1	Homer1							Vgf			Dennd4a			Nudt21	Pcdh7	Tmem63a	Asrgl1		Robo2
Skil	Chst2	Ptprn2	Fam155a	Sv2a	Cox8a		Gria3	Plat	Camk2b	1700026L06Rik				Chd9			Bcan	Chn2	Astn2			Tceal6	Fcgr1	Ctnnd2	Gimap6		Dzip3	Scn2b							Syt5			Cttnbp2nl			Banf1	Nav1	Gstp1	Brinp1		Eno2
Ifrd1	Fgfr1	Cacna1e	Gaa	Dkk3	1110032A03Rik		Nsg2	Cd2ap	Pcdha2	Nek5				Snx5			Map4k4	Elavl3	Ramp1			Camk2b	Ppp1r18	Paqr7	Slc40a1		Alg2	Pcsk2							Cdk5r2			Ubash3b			Usp1	4930402H24Rik	Osbpl1a	Alcam		Negr1
Sgk1	Oaf	Stxbp5l	A230006K03Rik	Sncb	Etfb		Lrfn5	Fcgrt	Disp2	Dnah2				Fli1			2019-03-08	Dock10	Csmd3			Serp2	Emr1	Msi2	Sox18		Pja2	Cyp46a1							Myo5a			Abhd12			Cdc7	Ppfibp1	Dbi	Chpt1		1700020I14Rik
A430104N18Rik	Pbxip1	Rnf112	Gabbr2	Nrp1	mt-Nd5		Pde1b	Mmrn2	Nptx1	Wdr78				Emr1			Sh3d19	Aatk	Gm3764			Ywhaz	Tlr7	Phka1	C130074G19Rik		Slc7a14	Ank3							Itpr1			Plekho1			H2afy2	Fnta	4930511M06Rik	Lrp1		Kcnq3
Ncf2	Fut9	Fbxw7	Pcdh19	Pygo1	Ift74		Kcnd2	Vwf	Gria2	Aebp1				Gm12166			Zfp365	Prox1	Map2			Kcnj9	Fam105a	Sox2	Cd200		Tceal6	Rap1gap							Atp1a1			Tbc1d9			E130114P18Rik	Traf4	Kndc1	Evi5l		Slitrk4
Slc15a3	Maob	Megf9	Clstn3	Itm2c	Tob1		Dnm1	Myl6	Mapk10	Gm5918				1700112E06Rik			Ephb1	Ank3	Cd9			Homer1	Herpud1	Mras	Ece1		Fam115a	Cdh8							Ak5			Tcirg1			Ubald2	Dbndd2	Bbx	Nova1		Ndrg3
Ccnl1	Arhgef26	Dlgap1	Ckmt1	Uhrf1bp1l	Ndufc1		Ppp3r1	Bnip2	Celf5	Spata24				Rapgef5			Tuba1c	Pip4k2a	Ncam2			Baiap2	Rplp1	Ahcyl1	Ppfibp1		Cygb	Map9							Ppp3cb			Plek			Sae1	2810410L24Rik	Nfasc	Fos		Scn1a
Serinc3	Adk	Snca	Matk	Serinc1	Cpq		Ahcyl2	Rgs12	Copg2	Vit				Dock4			Vps37a	Osbpl1a	Brinp1			Zmat4	Actb	Cnn3	Col4a2		Myo5a	Lrfn5							6330403K07Rik			Bin1			Dtymk	Usp16	Ttyh2	Galnt13		Kcnv1
Fam102b	Vegfa	Nbea	Rspo3		mt-Nd6		Gria2	Ocln	Pcsk2	Stk33				Runx1			Tm7sf3	Bpgm	Cyp2j6			Rasgrf1	Mertk	Ddah1	Golim4		Plekhb2	Stxbp5l							Eef1a2			Anxa3			Tuba1c	Enpp2	Pak1	Prkcq		Clstn3
Lyn	Ndufc2	Cacnb2	Chst1		Etfa		Cdh8	Col4a3bp	Srrm4	Nnat				Rplp1			Ptpre	Gltp	Asrgl1			Syp	Sirpa	Grm3	Mmrn2		Timp2	Ptprn							Map9			Slc9a9			Nop58	Ptpro	Wscd1	Ptn		Copg2
Cep85	S100a1	Opcml	Icam5		Cox7b		Kcnj6	Gng11	Prkar1b	Ttll3				Ubash3b			Secisbp2l	Atp1b3	Dpp6			Nrsn1	Cd180	Mertk	Gm20748		Pcdha2	Bex1							Cacng3			Cd9			Dynlt1a	Dpysl2	Tnni1	Ifi27		Pacsin1
Anxa3	Ugp2	Cyfip2	Atp6v1b2		Ndufv3		Gda	Iqgap1	Csmd1	Spag16				Ehd4			Stxbp3a	Otud7b	Sntg1			Ckmt1	Arhgdib	S100a1	Cp		Mdh1	Ppp3r1							Cpne5			Fam49b			Smarcc1	Srcin1	Pip4k2a	Tceal3		Dlgap1
Dleu2	Nrcam	Nefl	Camk4		Sh3d19		Sprn	Atox1	Got1	Lrrc51				Rasgrp3			Gng12	Tmem229a	Cobl			Bdnf	Fyb	Ptplad1	Rasip1		Tceal5	Syt6							Cnr1			Mtdh			Hdgf	Pde9a	Elovl7	Chst11		Epha5
Ctsb	Ptplad1	Atp1b1	Zcchc18		Gm10221		Ehd3	Sparc	Khdrbs3	Ddo				Arrb2			Epb4.1l2	Nfasc	Tmem176a			Fxyd7	Marcks	Gpld1	Plat		Kcnc1	Tomm70a							Myt1l			Rin2			Tuba1a	Lrrtm2	Bcas1	Trib2		Smim13
Efhd2	Vcam1	Slit3	Gnaz		Atp5l		Cnnm1	Mgp	Gabrg2	Lrrc6				Scoc			Fam13c	Dixdc1	Alcam			Tspyl4	Jund	Prdx1	Col4a1		Slc12a5	Itpka							Grm5						Whsc1	Cdk14	Ppp1r16b	Adam9		Mal2
Gusb	Fermt2	Add2	Peg3		Uqcr10		Gm26871	Rgcc	Bcl11a	Iqck				Nrros			Taldo1	Phldb1	Rere			Grin2b	Irf5	Nim1	Rbms1		Arhgap6	Agap2							Baiap2						Snrpd1	Slc1a1	Rcan2	Adora1		Cdkl5
Spi1	Aldh7a1	Kcnq3	Celsr2		Parva		Unc80	Cd97	Slc12a5	Wdr66				Creg1			Lima1	Map7d1	Klhl5			Clstn1	Ecscr	Paqr8	Timp3		2019-09-03	Caly							Ldb2						Rbm3	Jmy	Otud7b	Nlgn3		Got1
Mapkapk2	Kcnj10	Dkk3	Fam115a		Atp5g3		Lrrc7	Maoa	Strbp	Ccdc60				Cyfip1			Strn	Lamp1	Sox5			Atl1	Rel	Cyp2d22	Adcy4		Cacng2	Gucy1a3							Fut9						Hnrnpab	Snx30	Elovl1	Ankrd11		Rasgrp1
Rnaset2a	Hrsp12	Shisa6	Celf2		Usmg5		Igfbp5	Afap1l1	Tmem59l	Dusp14				Gtf2h2			Prdx2	Mrps28	Pcdhga9			A830010M20Rik	Hexa	Camk2g	Tbx3		Chl1	Pde2a							Pclo						Nucks1	Ctsl	Prr18	Mtss1l		Serpini1
Cfh	Elovl5	Bai3	Sipa1l1		Ndufb11		Wasf1	Fam101b	Tubb2a	Rgs22				Gab2			Igsf11	Ptma	Tubb2b			Rprml	Ccnl1	2310022B05Rik	St6galnac2		Ar	Sowaha							Nrxn1						Snrpg	Ppp1r16b	Nipa1	Sox5		Nlgn1
Pabpc1	Arhgap5	Ar	Tubb2a		mt-Nd2		Atp2b2	Ppfibp1	Kif5c	Elof1				Wasf2			Ago3	Sccpdh	2019-03-01			Camta1	Plxdc2	Kcnj10	Igf1r		Serp2	Gabra2							Epha7						Dpysl3	Dynll1	Bpgm	Ctnnd2		Zfp804a
Rplp1	Grm3	Adcy2	B3galt2		Ccnd2		C1qtnf4	Tmsb4x	Ndn	Hspa2				Ctsh			Dgat2	Acot7	Fam155a			Ildr2	Entpd1	S100b	Tspo		Epb4.1l1	Rnf112							Zcchc18						Myef2	Myrf	Pcdh9	Smoc1		Nrxn3
Herpud1	Cadm1	Dab1	Scn2b		Thumpd3		Atp6v1a	Myo1b	Ppp3r1	Ttc12				Cd86			Znrf1	Kif21a	6030443J06Rik			Tceal5	Cmtm6	Dkk3	Myl6		Ccl27a	Ctxn1							Snrpn						Nup62	2019-09-07	Arhgap23	Trio		Camk2a
Hck	Mertk	Kif5c	Got1		Atp6ap2		Nbea	Gjc1	Mmp16	A330021E22Rik				Ophn1			Cdc42se2	H2afj	Usp24			Ly6h	Ifngr1	Aldh7a1	Clic4		Sult4a1	Gm26871							Atp2a2						Rbl1	Rapgef1	Rtn4	Dner		Cacna2d1
B4galt1	Kcnj16	Dgkz	Stxbp1		Ndufa13		Grm1	Col4a2	Scn2b	Bphl				Mbnl1			Ankrd28	Neat1	Ptprt			Map7d2	Gpr183	Ugp2	Polk		Myh10	Nrxn3							Ryr2						Nfix	Tmem132b	Abca2	Rnf144a		Ncdn
1700112E06Rik	Tsc22d4	Pcdh19	Tceal6		2010107E04Rik		Scn8a	Slc30a1	Nap1l5	Ptgr1				Rreb1			Cd81	4930506M07Rik	Lima1			Pcdha2	Prkcd	Pitpnc1	Gbp7		Eef1a2	Brinp1							A030009H04Rik						Srsf3	Wasf1	Hsp90aa1	Lrrtm2		Uchl1
Tbxas1	Slc7a11	Kcnma1	Tspan13		1110004E09Rik		Brinp1	Cdkn1a	Hecw1	Tppp3				Daglb			Sema3d	Wscd1	E130114P18Rik			Gabbr2	Hck	Mid1ip1	Ptprg		Thy1	Dnm1							Stmn3						Gm10068	Tmeff2	Cd81	Gm3764		Clstn1
Cflar	Idh2	Bcl11a	Sncb		Cox4i1		Svop	Plk2	Gabra3	Fhad1				Picalm			Ctsl	Cdc42ep2	Ckb			Lrrc4c	Efhd2	Cdh2	Ets1		Camta1	Scn1a							Celsr2						Sox4	Csad	Sox10	Omg		Fbxw7
Zfp36l1	Fads1	Rtn1	Tubb3		Hist1h2al		Rims1	Esyt2	Atp2b2	Slc38a1				Git2			Glrb	Tmem63a	Snx1			Kcnb2	Plcl2	Chst2	Col4a3bp		Gabrg2	Unc80							Cmip						Nap1l1	Fam102a	Gstm7	Igsf21		Atp1b1
Kdm6b	Cdh2	Kcnip2	Ttc3		Tomm7		Slc39a6	Luzp1	Prkcg	4933405E24Rik				Fam49b			Sox4	Abca2	Dpp10			Ccl27a	Runx1	2610203C20Rik	Ebf1		Cib2	Rtn1							D3Bwg0562e						Mrps28	Fscn1	Adipor2	Itgav		Cabp1
Mef2a	Hist1h2bc	Erc2	Ube3a		Sox9		Npnt	Abcc4	Atp2a2	Mfsd7b				Ly6e			Susd4	Hepacam	Tmem132b			Pja2	Cotl1	Chchd10	Fam101b		Ywhah	Hras							Clstn3						Rnaseh2b	Eps8	Myo6	Pcdhga9		Cend1
Arl4c	Pitpnc1	Chst1	Arpp21		Tbcel		Eml5	Gbp7	Ssbp2	Rabl2				C3ar1			Spsb1	Tmem258	Slc22a17			Sh3gl2	Hmha1	Slc20a1	Bnip2		Usp11	Rgs8							Slc24a2						Pola1	Kazn	H2afj	Nrxn2		Rtn1
Picalm	Slc41a1	Matn2	Camk2a		Abhd2		Ahi1	Cp	Elmod1	Nudt4				Arhgap5			Trio	Ube2d1	Pcdh9			Rit2	Ctsc	Srebf1	Nrp1		Flywch1	Ddn							Eno2						Rangap1	Parp1	Adi1	Jun		Dock3
Elmo1	Oat	Mmd	Slc7a4		Slc25a39		Arhgef9	Fnbp1l	Nsg2	Dnah7b				Lrp1			Dpysl2	Bbx	Arhgap31			Grm5	Ctsl	Scd2	Rras		Gabrb3	Dlx6							Fbxl16						Pa2g4	Rap1gap	Clmn	Nmnat2		Myh10
St3gal6	Agpat5	Rprml	Atp2b1		Uqcrq		Hpca	Calm1	Hspa12a	Rmst				Ctsa			Csad	Sytl2	Ptn			Tagln3	Nckap1l	Scrg1	Slc3a2		Nr2f2	Rab40b							Gfra2						Sfpq	Ago3	Myrf	Cd302		Stx1b
Nckap1l	Mid1ip1	Mical2	Kif5c		Uqcr11		Syn2	Itga6	Efhd2	Anxa2				Ssh2			Rap1gap	Lap3	Fgf14			Hlf	F11r	Pou3f3	Tdrp		Mllt11	Sptbn4							Brinp1						H1f0	Polr3h	Cd9	Cobl		Caly
Dapp1	St3gal4	Slc12a5	Zwint		mt-Nd4l		Lmo7	Gpx1	N28178	Sox9				Syngr2			2019-09-07	Dbi	Sh3d19			Serpini1	Zfhx3	Crot	Tfrc		Nsf	Arhgef9							Faim2						Nfib	Atp6v0a2	Gprc5b	Usp32		Ncald
Slc8a1	S100a13	Pclo	Chga		Itpr1		Cacna2d1	Abhd2	Kifc2	Mgst1				Slc9a9			Cldn25	Bcas1	Itgb8			Syt13	Rps6ka1	Gnao1	Ier2		Hspa4l	Ahi1							Ociad2						Hnrnpa2b1	Rnf144a	Erbb2ip	Hip1		Dner
Rhoh	Myo10	Ina	Cmip		Tpd52l1		Sowaha	Polk	Sgtb	Tm4sf1				Bmp2k			Cyp2j6	Myrf	Ankrd11			Unc80	Cep85	Slc41a1	Gjc1		Dnm1	Rab3a							Celf5						Pfn2	Bcl7a	Phldb1	Arhgap31		Fam126b
Txnip	Pon2	Rims1	Plcb1		Cox6c		Ube3a	Fli1	Parm1	Hipk1				Cd14			Ppp2r2a	Myo6	Ostf1			Eef1a2	Smap2	Adk	Dusp1		Pld3	Syn2							Camk2b						Ilf2	Prickle1	Il1rap	Ostf1		Zfp365
Rasgef1b	Fabp7	Dnm1	L1cam		Atox1		Ccdc85a	Lamb2	D3Bwg0562e	Fhl1				Clic1			Sez6l	Fkbp1a	Sox2			Dlgap1	Ikzf1	St3gal4	Tsc22d3		Ube3a	Slc2a13							Synj1						Fabp7	Dnm3	Gng11	Hip1r		Ppp3ca
Smap2	Cd81	Map1b	Ntrk3		Csrp2		Fgf14	Grap	Syt13	Gclc				Cotl1			Rtn4	Bnip3l	Adam9			Kcnc1	Sepp1	Cpeb4	S100a11		Pdxp	Dock3							Mllt11						Sp9	Lhfpl2	Sypl	Dpp6		Lrrtm4
Mylip	Pou3f3	Dlg2	Tenm4		Slc12a2		Chrm1	Tspo	Pdxp	Tctn2				Fchsd2			Osbpl1a	Frmd5	Ngfrap1			Rangap1	Clic1	Fermt2	Itga6		Pianp	Prkce							L1cam						Hnrnpu	Map4k4	Ube2d1	Susd4		Ptprn
Arhgdib	Myo6	Cdk5r1	Arf3		Mccc1		Celf4	Hspa1a	Nrep	Anxa5				Bin1			Pop4	Kndc1	Srrm2			Tubb3	Rasgef1b	Myo10	Abcc4		Pde1a	Serp2							Kalrn						Fnbp1l	Arhgap5	Gnai1	Klhl5		Ptprd
Ptpn6	Cadm2	Kcnj6	Napg		Hspb8		Ncald	Cav2	Scn3a	Shroom3				Mtdh			Tsc22d4	Slc38a2	Fyn			Got1	Scamp2	Clmn	Msn		Rnf208	Grik2							Ptprn						Xpo1	Rictor	Adamts4	Tuba1a		Rgs7bp
Fosb	Ctnnd2	Arpp21	Gpm6a		Pip5k1b		Ddn	Clic4	Atl1	S100a6				Lrch1			Ppfibp1	Tuba1a	Tceal3			Nptn	Gtf2ird2	Arhgap5	Ier3		Dtd1	Hook1							Ywhah						Gm12184	Znrf1	S100a16	Gm12184		Rab6b
Rhob	Chpt1	Ppp3r1	Gls		Dnajc3		Pgm2l1	Wwtr1	Mdh1	Mro				Pnp			Ddc	Nipa1	Sox2ot			Rasgrp1	Lyn	Rora	Iqgap1		Gria1	Ptprn2							Calm2						Brd3	Sh3d19	Cdk5rap2	Nlgn2		Disp2
Rps12	Capn2	Arhgef25	Ppp3ca		Tspan3		Kbtbd11	Ier2	Cacng2	B9d1				Ptprj			Mapt	Etv1	Rims1			Grin1	Rps9	2019-03-02	Esyt2		Ptprn2	Wasf1							Ogfrl1						Snrpa1	Rtn1	Itpk1	Tceal6		Ociad2
Il6ra	Tagln3	Icam5	Nefh		Fuom		Map2k1	Foxp1	Hlf	Pcp4l1				Rnf216			Opcml	Cdk5rap2	Maged1			Peg3	Man2b1	Oat	Rhoc		Ap3b2	Vgf							Syt7						Dbn1	Timp4	Enpp4	Marcksl1		Slc8a2
Jmjd1c	Nim1	Nsg2	Nrcam		Lamp2		Dlg2	Msn	Fam81a	Ccdc39				Plek			Atat1	Ano4	Fchsd2			Slc4a10	Ly6e	Pfkm	St3gal6		Pcp4	Zcchc18							Fam126b						Fubp1	Plekhb1	Ptma	Atp6v0e		Rbfox3
Fermt3	2610203C20Rik	Ndrg4	Cacna1e		Ict1		Smoc2	Slc3a2	Cdk14	Wwc1				Frmd4a			Pcbp4	Pde8a	Ptpre			Pld3	Rrbp1	Fads1	Lamb2		Tubb2a	Cap2							Camkv						Brd8	Cadm4	Shisa4	Srgap1		Plcb1
Cyba	Ptk2	Itpr1	Magee1		Gde1		Slc12a5	Lmo2	Tspyl4	Nek11				Rin2			Atxn7l3b	Rcbtb1	Myo5a			Gucy1b3	Srgn	Myo6	Serpinh1		Nrxn3	Bcr							Atl1						Cbx1	Cdc42se2	Rnf130	Fut9		Chd5
Fgd2	Pfkm	R3hdm1	Atp6v1a		Atp11c		Ttc3	Cyb5r3	Gng2	Nudt14				Itga6			Med30	Enpp4	Cdh13			Phactr1	Slc16a6	Mageh1	Mfsd2a		Synj1	Thsd7a							Ly6h						Parp1	Gpr180	Lrrn1	Gpm6a		Mical2
Slc7a8	Add3	Runx1t1	Mapk8ip2		Zfp106		Trank1	Ptprm	Nrn1	Tex9				Rap1gds1			Vimp	Clmn	Chpt1			Efr3a	Srgap2	Ttyh3	Wwtr1		Gabrg3	Nptn							Atp6v1g2						Matr3	Ppfibp2	Pacs2	Arxes2		Cyfip2
Prkcd	9330182L06Rik	Wasf1	Fam131a		Atp5e		Robo2	Synm	Nrxn1	Dbi				Snx18			Scrg1	Trim2	Ccser1			St8sia3	Ivns1abp	Grina	Mpzl1		Kif3a	Nefm							Kcnip4						Vars	Phldb1	Map7d1	Mdk		Atp6v1b2
H2-D1	Zbtb20	Ahi1	Rasgrf1		mt-Nd3		Sez6l	Prex2	Gpr158	Syne1				Sft2d1			Fmnl2	Map1a	Agpat5			Slc12a5	Havcr2	Rasa2	Rgs12		Nmnat2	Tceal5							Rock2						Rnd3	Lima1	Dixdc1	Abhd2		Slc7a4
4933406I18Rik	Prdx1	Sipa1l1	Gng3		Fkbp2		Myt1l	Klf6	Mkl2	Efcab2				Tpm3			Fscn1	Serinc5	Mmd2			Ywhab	Tbxas1	Nrcam	Cd97		Kif21a	Negr1							Tmem130						Bzw2	Map4k5	Spg20	Papss1		Efnb2
Emr1	mt-Nd6	Dgkb	Kcnh3		Fam73a		Adarb2	Jam2	Cplx2	Nphp1				Akap13			Lamp1	Ddr1	Scg5			Atp6v1b2	Vav1	Farp1	Il10rb		Pacsin1	Myh10							Celf4						Vrk1	Ube2e2	Frmd5	Cask		Klc1
Cotl1	Rasa2	BC018242	Cyp46a1		Uqcrh		Fam135b	Rbpms	Aak1	Ect2l				Abca1			Urm1	Shisa4	Spry2			Rab3c	Creg1	Acadl	Jam2		Atp2b4	Calm2							St3gal5						Ngfrap1	Cpm	Arrdc3	Tmem167		A830036E02Rik
Man1a	Slc25a4	Cadps	Dlgap1		Uqcrb		Dlgap1	Fos	Vopp1	Ccdc34				Ptbp3			Zfp579	Arhgap23	Lrrtm2			Atp6v1a	Fermt3	Ndufc2	Arpc1b		Nalcn	Rragd							Caln1						Rbmx	Ubl3	Unc5b	Sox2		Rasgrf1
Cyth4	Gna13	Enc1	Slitrk1		Atp5o		Lyst	Alas1	Gas7	Dgat2							Cyth2	Spg20	Mpzl1			Grm7	Gm9843	Eci1	Cd2ap		Micu3	Prkar2b							Slitrk4						Psip1	Cdk4	Ninj2	Ncan		Myo5a
Slc16a6	Camk2g	Nrg3	Trpc4		Erlec1		Chl1	Slc16a1	Clstn1	Mlc1							Slc1a1	Sox10	Ccdc88a			Flrt3	Nav3	Daam2	Cnn2		Atp6v1d	Gsg1l							Pacsin1						Snrpd2	Golga7	Serinc5	Wscd1		Cx3cl1
Maml3	Laptm4a	Lphn3	Bcl11a		Tmem147		Cdk5r1	S1pr1	Arhgdig	Id4							Tnfrsf21	Sypl	Ncam1			Ensa	Kdm6b	Hist1h2bc	Maoa		Slc2a13	Map2k1							Sh3gl2						Tex9	Hip1r	Hepacam	Fchsd2		C1qtnf4
Adap2	Pfkp	Dlgap2	Syne1		Oxct1		Gabra2	Dusp1	Slc25a22	Efcab12							Ncam1	Pacs2	Ntm			Snca	Samsn1	Sdc2	Anxa5		Crmp1	Gria2							Serp2						Ilf3	Ppm1l	Fam177a	Reep1		Zfyve28
Maf	Fam171b	Wscd2	Lrrtm4		0610011F06Rik		Dgkg	Gsta4	Atp6v1b2	Vim							Hmgcr	Ralgds	Cask			Gria2	Slc11a1	4930402H24Rik	Slc16a1		C230004F18Rik	Epb4.1l1							Gls						Ssrp1	Papss1	Lap3	Ccdc88a		Gda
Agmo	Sash1	3110035E14Rik	Slc6a17		Glrx3		Sidt1	Phldb2	Rian	Rsph9							Cmip	Clic4	Slc6a1			Impact	Tagap1	Fam21	Rbpms		Rnf11	Mapk1							BC018242						Ckap5	Abcd3	Chn2	Rab31		Lpgat1
Rrbp1	Nr2f1	Ddn	Cntn1		Pgk1-rs7		Arpp21	Tjp1	Tro	Naaa							Ncam2	Cd9	Tril			1700020I14Rik	Picalm	Pon2	Tns1		Sv2a	Pcp4l1							Ssbp3						Smc6	Asrgl1	Pcbp4	Itpr2		Aak1
Edem1	Pcdhga9	Shank1	Pacsin1		Slc25a5		Mmp16	Ier3	Tubb3	Arhgdig							Ktn1	Spock3	Kif3a			Cdh8	Myo7a	Add3	Grap		Cntnap2	Cttnbp2							Nptn						Naa38	Prdx2	Ralgds	Phactr3		Ildr2
Pmepa1	Trpm3	Cap2	Svop		Atp5j2		Ildr2	Tmod3	D430041D05Rik	2610301B20Rik							D430041D05Rik	Arl2	Phactr3			Rbfox1	Tanc2	Eci2	Klf6		Ccdc104	Fam65b							Cyp46a1						Lsm6	Yipf1	Kcnj10	Ptprs		Tmem59l
Cyfip1	Rora	Slitrk5	Zfp385b		Idh3a		Mkx	Myh9	Ak5	Tmem47							Gm12184	Cldn25	Tia1			Snrpn	St3gal6	Tspan3	Hspa1a		Celf5	Kcnj4							Atp2b1						Cep57	Tmem167	Tmem229a	Lima1		Fstl4
Slco2b1	Prdm16	Rbfox3	Kcnh7		Atp5d		St6galnac5	Plcb4	Gm15800	Chchd10							S100a6	Adamts4	Nalcn			Tceal3	Hspa5	Suclg1	Fos		Prr24	Plcb1							Chd5						2700029M09Rik	Smpd2	Kif21a	Os9		Itpka
Ifngr1	2019-03-02	Matk	A030009H04Rik		Aldh2		Syne1	Itgb1	Vstm2a	Cnn3							Zbtb1	Elovl7	Tra2a			Cdh12	Nr4a1	Ngef	Slc7a1		Armcx1	Bai3							Ajap1						Tbc1d31	Gpr37l1	Etv1	Uso1		Wasf1
Nrros	Sdc2	Synj1	Nrip3		Arsg		Shisa9	Cobll1	Crtac1	Ift74							Cdk14	Gng11	Grid1			Napg	Rps12	Macf1	Slc31a1		2019-09-06	Slc12a5							Grin1						Hnrnpr	Mapt	Phgdh	Uchl3		Map1a
Susd3	Eps8	Sptbn2	Nptn		Atp5h		Nptn	Ifnar1	Ndrg3	Clybl							Cadm2	Ppp2r3a	Hnrnpa2b1			Soga3	Snx5	Zbtb20	Cd151		Cdk5r1	Dmtn							Adam22						Smc1a	Dock9	Reep5	Myo5a		Syngr3
Csmd3	Tspan3	Pex5l	Nt5dc3		Trp53inp2		Grin1	Lrba	Arhgef9	Acot1							Fam3c	Sema6a	Nckap5			Cadps	Adap2	Chpt1	Nkd1		B4galt6	Sipa1l1							Myh10						Zfp326	Acbd3	Sytl2	Tubb2b		St3gal5
Ubash3b	Phyh	Frmpd4	Sorl1		Aco2		Gdap1	Anxa5	L1cam	Ezr							Ptpn11	Clip3	Lrrfip1			Gpr158	Nrros	Ccdc88a	Gpx1		Napb	Trim46							Disp2						Phf6	Serinc5	Rhou	Mettl9		Ywhag
Etv6	Cs	Nptxr	Adam22		Slc25a3		Mycbp2	Serpinh1	Sobp	1110032A03Rik							Eif4a1	Cfl2	Pde4d			Gabrb3	Abhd12	Sat1	Ackr3		Pkib	Rprml							Camta1						Tspan6	Strn	Ptp4a1	Tril		Bai1
Rcsd1	Eci2	Trpc4	Homer1		Cox7a2		Nedd4l	Cyth3	Atp6v1d	Zfp36l1							Zfp326	Zfp536	Khdrbs2			Syn1	Mef2c	Mfn1	Zic3		Vstm2a	Nap1l2							Dmxl2						Srsf7	Ccser2	Glod4	Lrrfip1		Opcml
Tmem173	Suclg1	Zdhhc2	Thra		Ndufb5		Kcnma1	Dab2ip	Ppp3cb	Nudc							Sh3rf1	Glod4	Cdh18			Rph3a	Gm10073	Eps8	Synm		N4bp2l1	Nbea							Fstl4						Nfia	Syt11	Clic4	Lpcat1		Crmp1
Pdgfb	Acadl	Ntrk3	Fam171b		Anapc13		Sorl1	Tsc22d3	Nrgn	Gstm1							Camsap2	Prdx1	Hip1			Zbtb18	Tcirg1	Sash1	Alas1		Csrnp3	Mdh1							Sgtb						Yeats4	Gm15446	Glul	Eif1b		Kcnh5
Dock8	Wdr17	C77370	Hspa12a		Cep290		Eno2	Rhoc	Prkar2b	Clu							Tmem167	Arrdc3	Bex2			Nrxn1	Cd164	Cs	Itga1		Vamp2	Lmo4							Flrt2						Pou3f3	Acsl3	Bnip3l	Syt11		Celf2
Creg1	Lama2	Prkce	Plxna1		Pfkp		Tenm2	Sorbs2	1700020I14Rik	1700028P14Rik							Fbxo32	Stxbp3a	Pcdh10			2019-09-03	Ppcdc	Tagln3	Luzp1		Ndrg4	Dgki							Aak1						Maged1	Ehd3	Rab31	Epdr1		Slitrk1
Ctsh	Hsd17b4	Chl1	Atp2b4		Lgals3bp		Pcsk2	Cdc42ep3	2019-09-06	Ifitm3							Timp4	Adipor2	Sfrs18			D3Bwg0562e	Rps29	Capn2	Calm1		D3Bwg0562e	A030009H04Rik							Nckap1						Cbx5	Ktn1	Arl2	Klhl13		Rbfox1
Sat1	Nfia	Cpne8	Prnp		Sod1		Fbxw7	Nrp1	Kcnq3	Aqp4							Ptpro	Il1rap	Pcmtd2			Gng3	Ifrd1	Pcdhga9	Fli1		Prkacb	Kctd1							Slc25a22						Tcf4	Scamp2	Slc38a2	Abcg1		Kcnb1
Arpc2	Cox8a	Slc24a2	Akap11				Rasgrf2	Actn4	Nalcn	Hsp90aa1							Dusp26	Sv2a	Itgav			Dock3	Csrnp1	Alcam	Itgb1		Klc1	Osbpl8							2900011O08Rik						Polr3k	Kndc1	Dock10	Adcyap1r1		Reep2
Ecscr	Dkk3	Arf3	Reep1				Gabrb2	Rhoj	Ldb2	Csrp2							Asrgl1	Inpp5f	Vegfa			Trim37	Rin2	Tmed5	Plk2		Cacna1b	Slc7a4							Apba2						Zbtb20	Thra	Ppfibp2	Myo10		Plcxd3
Sall1	Rbp1	C230004F18Rik	Rnf208				Kctd16	Mpzl1	Hs6st2	Rabl5							Dock4	Ptpn11	Cpq			Chl1	Npc2	Hlf	Ostf1		Ddx24	Cdk17							Tspyl4						Acat1	Sox2	Mettl7a1	Ncam1		Gria3
Cmtm6	Pcdh10	Rbfox2	Asns				Negr1	Fry	Peg3	Prdx6							2019-09-02	Fgfr2	Pkia			R3hdm2	Mylip	Nfia	Abhd2		Dnm1l	Nsg1							6430548M08Rik						Smc3	Cadm2	Elavl3	Elavl4		Tbr1
Rps9	Mcur1	Cdh8	Snap91				Stxbp5l	Dlc1	Fam115a	Hspa4l							Acat2	Cyth1	Wipf1			Crtac1	Cd9	Gna13	Btg2		Scoc	Ttc3							Ncdn						Ncaph2	Epn2	Pde8a	Vezf1		Nedd4l
Jund	Trps1	Sez6l	Pdxp				Auts2	Mfsd2a	Usp14	Mt2							Mapre1	Klf13	Ptprs			Ndrg3	Arrb2	Smox	Myh9		Usp14	Ppp1r2							Sez6l						Prim2	Slc25a17	Larp6	Tra2a		Cdr1
Ivns1abp	Cpeb4	Arhgef9	Clstn1				Dbn1	Btg2	Clstn3	1110004E09Rik							Hook3	Elovl6	Sema5b			Syngr3	Ctsh	Agpat3	Cdkn1a		Kcnq2	Nat14							Elavl4							Vimp	Ank3	Canx		Camk2d
Man2b1	Bmpr1a	Large	Lphn1				A930011O12Rik	Fosb	Chn1	Dpcd							Arf4	Zdhhc20	Copg2			Csrnp3	B4galt1	Slc3a2	Aldh2		Zmym3	Cit							Ube2ql1							Fbxo7	Prdx1	Fam3c		Scn3b
Fam105a	Fdft1	Csmd1	Hspa4l				Dapk1	Arhgap31	Mfsd4	Lmo4							S100a16	Ablim2	Trio			Hsph1	Arpc1b	Abat	Pls3		Kifap3	Camk2n1							App							A330076H08Rik	Acot7	Casc4		Cyb561
Scamp2	Sfxn1	Man1a	Map7d2				Itga8	Tiam1	Ryr3	Mt1							Ppp1cb	Rnf130	Thsd7a			Epha5	Pabpc1	Slc25a4	Cyb5r3		Gabarapl1	Ensa							Lrrtm1							Tceal8	Tmem258	Fyn		Fras1
Aim2	Spire1	Slc17a7	Aak1				Cap2	St3gal6	Reep1	Gstt1							Sox6	Ncam1	Casc4			Hspa4l	Elmo1	Hmgn3	Scarb1		Atpif1	Anks1b							C1qtnf4							Cdc37l1	Cdc37l1	Chd7		Cnr1
Irak2	Syne1	A230006K03Rik	Abi2				Cadm2	Jun	Rtn3	Gsta4							Rpf2	Lrrn1	Pou3f3			Tubb2a	Gns	Gpr56	Lmo2		Calm2	Arpp19							Akap11								Ddr1	Sfrs18		Pdp1
Adamts1	Daam2	Ccser1	Scg2				Grin2a	Anxa7	Trim37	Apoe							Cdh11	Phlpp1	Pnn			Camk2n2	Anxa3	Abcd3	Slc30a1		Cmip	Cacnb4							Tmem178b								Nudt4	Tmem63b		Chrm1
Rps24	Hmgn3	Celf5	Gprasp1				Rasal2	Mllt4	Napg	2610015P09Rik							A330076H08Rik	Omg	Arglu1			Psd3	Itm2b	Id3	Tiam1		Dynll2	Tmem191c							Mtpn								Mtmr2	Agpat5		Pgbd5
Myo7a	Dgkb	Chrm1	Slit3				Slit3	Rasgrp3	Nell2	Tsga10							Man1a2	Ado	2900011O08Rik			Asap1	Jmjd1c	Phyhipl	Ctnna1		Matr3	Lrrc4c							Pak3								Gal3st1	Kif3a		Scn2b
Rpl32	2810055G20Rik	St8sia3	Tmem130				Chst1	Rab11a	Chl1	Ift43							Specc1	Kcnj10	Mtss1			Nptxr	Fau	Emc3	Lgals9		Ywhab	Kifap3							Wasf1								Slu7	Atxn7l3b		Arhgap20
Fau	Mfn1	Rgs7bp	Calm2				Cx3cl1	Slc38a3	Sez6l	Rasa2							Rnf144a	Cystm1	Abhd17b			Micu3	Tpm3	Slc25a3	Tmem123		Ubqln2	Stmn3							Vamp2								Ano4	Cadm4		Diras2
Plcl2	Sorbs1	Syt4	Nap1l5				Tmem178	Tmtc2	Nov	Slc25a18							Fubp1	Limch1	Pcdha2			Ddit4l	Cyfip1	Vimp	S1pr1		Dnajc5	Atp6v1d							Dmtn								Stxbp3a	Ngfrap1		Nbea
Pmp22	Agpat3	Trim2	Gnai1				Faim2	Gnai2	Klc1	Bbs9							Ppp2r1a	Clasp2	Psip1			D10Bwg1379e	Plekho1	Idh2	Hes1		Nipsnap1	Cdk5r1							Scg5								Zfp536	Abcd3		Elavl2
F11r	Slc25a3	Foxp1	Cdkl4				Camk2n1	Ybx1	Mal2	Itm2c							Eif1b	Fis1	Smarcc1			Kcnj3	Pdgfb	Pcdh10	Mgp		Slc22a17	Clstn3							Slc4a10								Efcab14	2310044G17Rik		Atl1
Sepp1	4930402H24Rik	Ttc3	Sult4a1				Stmn3	Junb	Ncoa7	Sox2							S100a1	Mast4				Ptpn5	Gusb	Hmgcs1	Dab2ip		Grm5	Mkl2							Slitrk1								Rcbtb1	Dock9		Celsr2
Fli1	Phyhipl	Mapk10	Srrm4				Mmd	Sh3bgrl	Tmx4	Etfa							Wasf1	Nudt4				Fam126b	Rpl10-ps3	Gpd2	Parvb		Soga3	Arhgap32							Pld3								Mrps28	Pnn		Rapgefl1
Basp1	Ndufa12	Syn2	Shank1				Tceal5	Ctnna1	Map2k4	Fosb							Acbd3	Mid1ip1				Camk2a	Cflar	Dmd	Fosb		A330076H08Rik	Srrm3							Ttc9b								Map1a	Eps8		Phactr1
Ly6e	Sat1	Zbtb18	Tmem179				Cntnap5a	Rpl41	Me3	Nipal2							Dnaja1	Rdx				Dzank1	Ldlrad4	Slc25a5	Plcb4		Zcchc17	Gucy1b3							Zwint								Fkbp1a	Map7d2		Ube3a
Tgfbr2	Bai3	Sh3gl2	Jph4				Tmem108	Myo10	Sv2a	Srek1ip1							Psmd13	Deb1				Caly	Gm12166	Timp3	Foxp1		Cd99l2	Unc79							Rtn4rl1								Cldn25			Lphn1
Tpm3	Ccdc88a	Phactr1	Nr4a2				Slitrk3	Tpm1	Camk2a								Arhgef7	Daam1				Tmem158	Mef2a	Tkt	Cobll1		Map2	R3hdm1							Pcdha2								Omg			Cacna1a
Pag1	Itgb8	Ntm	Atp2b2				Lmo3	Ostf1	Armcx1								Man2a2	Klhl2				Caln1	Slc29a3	Ndufa12	Tjp1		Lrrn2	Lzts1							Ensa								Trim2			Dusp8
Rps29	Macf1	C1qtnf4	Oxr1				C230004F18Rik	Pcmtd1	Cdkl2								Scamp2	5031439G07Rik				Tshz3	Rpl39	Uqcrfs1	Gnai2		Cfdp1	Camk2a							Bai1								Kctd13			Tenm1
Pfn1	Etfa	Hspa12a	Sez6l				Kcnt2	Rps14	Apba2								Snrpd1	Atp8a1				Ephx4	Ctsa	Kidins220	Rab11a		Atp6v1a	Pnmal2							Ildr2								Ppp2r3a			Epha7
Hmgb2	Sqle	Fam189a1	Slc25a22				Csmd1	Tmsb10	Atcay									Nrbp2				Cmip	Dusp6	Cox8a	Anxa7		Dgkg	Nin							Sphkap								Sema6a			Atp6v0a1
Hexa	Alcam	Flrt2	Calm1				Mapk1	Tspan5	Nptn									Ppfibp2				Snap47	Mapkapk2		Slc38a3		Agbl4	Ngfrap1							Snap91								Mcam			Pak1
Fam49b	Ndufa13	Sidt1	Slc24a2				Arhgap20	Pls3	Adora1									Cdc37l1				Rock2	Pmp22		Cdc42ep3		Vstm2l	Ckmt1							Gabra3								Ptpn11			Reep1
Diap2	Id3	AI593442	Nceh1				Ncam2	Wasf2	Gprasp1									Rnf220				Mapk1	Fam49b		Ifnar1		Cyfip2	Adamts3							Rasgrf2								Daam1			Mapk8
Gab2	Tmed5	Galnt16	Sorcs3				Mal2	Hip1	Dnajc6									Tulp4				Kif21a	Dleu2		Tmod3		Kcnma1	Tsnax							Megf9								Cfl2			Fat3
Rapgef5	Gabbr1	Homer1	Slc4a8				Sybu	Lima1	Hecw2									Kat2b				Cdkl5	Rps24		Laptm4a		Ncoa7	Actn1							Elmod1								Plekha1			Fam115a
Snx5	Tcf4	Brd9	Ctxn1				Camta1	Nampt	Gnl3l									Dpy19l1				Clstn3	Slc7a8		Slc16a2		Napg	Nell2							Gria2								Micall1			Timp2
Rap1b	Prkcdbp	Tspan13	Cmas				Pip5k1b	Rps19	Hsp90aa1									Kif13a				Hook1	Lgals9		Wasf2		Rtn3	Rasgrf1							Opcml								Kazn			Nrxn1
Gm9843	Atp5k	Cdc40	Adam23				Pcdh19	Tbc1d4	Atp6v1a									Eid1				Ano3	Edem1		Clic1		Mgat4c	Inf2							Trim37								Tmeff1			Ina
Rpl18a	Abcd3	Anks1b	Lcmt1				Mctp1	Slc31a1	Shank1									Rab31				Ppp2r2c	Rplp0		Actn4		Unc5d	Rgs4							Serinc1								Rap1a			Elmod1
Rasgrp3	Spred1	Arhgap12	Dcaf12l1				Nsun7	Ifnar2	Synj1									Tm7sf3				Prkcb	Syngr2		B4galt4		Scrn1	Gaa							Hsph1								Nrbp2			Gabrg3
Nav2	Cdh10	Igfbp4	Ksr2				Arf3	Rpl38	Camta1									Scd1				Tomm70a	Fam102b		App		Srpk2	Kif5c							Bex2								Ablim2			2900011O08Rik
Rplp0	Uqcr10	B3gat1	Klhl3				Nrcam	Mxd4	Flywch1									Pim3				Mal2	Ptprj		Cald1		Arhgef9	Ppp1r7							Kcnq2								Apbb1			Agtpbp1
Dusp6	Tmem66	Ap3b2	Btbd10				Miat	Fam13c	Lrrc4c									Efcab14				6430548M08Rik	Pag1		Lrba		Stip1	Kcnq3							Cpne4								Scd1			Ywhah
Rps4x	Acadm	Lingo1	Atp6ap2				Susd4	Arpc1b	Plcxd3									Cdc42bpa				Gls	Tgfbr2		Ptprm		Mtch1	Ly6h							Cacng2								Deb1			Scn3a
Lrrc58	Tnik	Nckap1					Egfem1	Macf1	Gls									Ncam2				Gabrb2	Ddx26b		Tnfaip1		Erc2	Mpped2							Agap2								Phlpp1			Nrgn
Gm10073	Uqcrfs1	Cdkl5					Calm1	Apbb2	Pfkp									Reep3				Ociad2	Hps4		Dock9		Mblac2	Fam115a							Arhgef9								4930506M07Rik			Scrn1
Rpl12	Ndufb10	Rapgefl1					Dmtn	Laptm4a	Nrcam									Rap1a				Snx10	Hist1h1c		Pttg1ip		Map2k4	Ywhaz							Tagln3								Pcyt2			Gnl3l
Bmp2k	Tkt	Ajap1					Ppp1r9a	Dusp3	Mmp17									Grm3				Alcam	Sall1		Pdgfb		Basp1	Fkbp1a							Nedd4l								Olig2			Gpm6a
Rpl10	Phactr3	Scn1a					Matk	Mtus1	St8sia3									Slu7				Fhl2	Rpl12		Fam63a		2210016L21Rik	Ap1s1							Nlgn2								Pdgfa			Tenm3
Arrb2	Oxct1	Gabrg2					Jph4	Dock9	A330102I10Rik									Plcl1				Zfp365	Gm5148		Rpl38		Sez6l	Hsph1							Atp6v1b2								Fgfr2			Slc35f4
Zswim6	Atp5g3	Stmn3					Nr3c2	Sri	Fam49a									Wbp2				Ptprn2	Wdr89		Akr1a1		Hpcal1	Akap9							Nat8l								Reep3			Gls
Cd164	Acox1	Tmem158					Pkia	Gpd2	Nap1l3									Ppp2r2a				Tmem191c	Clta		Ifnar2		Gpm6a	Kcnt1							Gdap1								Tm7sf3			Celf5
Rin2	Ppp2r5a	Herc1					Napb	Tpm3	Arf3									Tmeff1				Cend1	Man1a		Mtus1		Ndrg3	Rnf150							1700020I14Rik								Rdx			Arhgef9
Rps18	Lap3	Akap6					Kif5c	2019-09-11	Cdh11									Agap1				Wasf1	Rpl30		2810025M15Rik		Slc4a10	Cyld							Pnmal2								Zdhhc9			Pi4ka
Klf6	Ptprt	Fgf14					Mfsd4	Anp32a	Gprasp2									Tmcc3				Ddx24	Cttnbp2nl		Sorbs2		Epm2aip1	Kcnk2							Mmd								B3galt5			Map2
Tpm3-rs7	Aco2	Pak3					Mkl2	Hes1	Rangap1									Add1				Srrm3	Tpm3-rs7		Tob1		Cbx5	Pak3							Plxna2								Fis1			Tubb3
Akap13	Cd302	2019-09-06					Gng2	Kif5b	Kcnd2									Tmbim6				Hspa12a	Id2		Tmsb10		Akap11	Epha7							Camk1d								Dip2a			Ppp3r1
Ophn1	Sdf2	Atp6v1g2					Plekhg5	Adipor2	Slc38a1									Snx1				Nat14	Rplp2		Fnbp1l		C77370	Syne1							Caly								Tspan15			Pld3
Msn	Pbx1	2019-03-01					2900011O08Rik	Pttg1ip	Atxn1									Arap2				Vstm2a	Limd2		Pomp		Atxn10	Cntn4							Gabra4								Atp8a1			Calm3
Gns	Sod2	Chgb					Nrg3	Mier1	Nceh1									9330182L06Rik				Smim13	Gm9846		Arhgap31		Ccdc136	Adam23							Pcsk1n								Pim3			Atp1a1
Rplp2	Sox5	Grm7					C77370	Pomp	A330076H08Rik									Vbp1				Kcnd2	Nfe2l2		Ginm1		Ssh2	Ric8b							Kifap3								5031439G07Rik			Syngr1
Ski	Kidins220	Map2					Epha6	Mprip	Osbpl6									Abhd17b				Gpm6a	Pnrc1		Pcmtd1		Stau2	Tnik							Tmem30a								Gab1			Gria2
Rps27a	Ank2	Shisa7					Ywhah	Rps20	Mapk8ip2									Dpysl2				Cpne6	Rps27		Vamp8		Lrrtm1	Slc22a17							Nlk								Mid1ip1			Nrxn2
Fscn1	Ppp2r2b	Slit1					Gpc4	Ppp1r2	Cacna2d1									Zeb2				A930011O12Rik	Rpl18a		Rasgrp3		Atp6v0a1	Snrpn							Atp6v0a1								Rnf220			Ttc3
Rpl10a	Idh3b	Nsf					Plcb1	Gm9846	Akap6									Tecr				Elavl2	Rps4x		Rps14		Prkce	Dlg3							Ptprn2								Elovl6			Arf3
Zfp710	Arl3	Ly6h					Bai3	Tpt1	Psd3									Mat2a				Ndn	Wasf2		Nampt		Ola1	Slc8a2							Cntn1								Zdhhc20			Ap3b2
Ptpn1		Sort1					Tceal3	Srpr	Herc1									Sys1				Gnl3l	Rap1b		Sri		Grin1	Atp6v1b2							Atp6v0e2								Enoph1			Nptn
Ehd4		Pde2a					Matr3	Stk38	Rnf150									Gab1				Lzts1	Dapp1		Rhoa		Lrrc4c	Lmo3							Pianp								Wipi1			Slc4a10
Ctsa		Tmem150c					Calm2	Rps27	Lonrf2									Pdgfa				Pak3	Rpl32		Gpd2		Smim13	Dlg4							Akap5								Pigyl			Ank3
Clic1		Celsr2					Synj1	Slc16a2	Hspa4l									Zfp706				Ttc9b	Bmp2k		Serpinb6a		Chchd6	Ccl27a							Gabrb3								Kctd3			Dnajc5
Rps6ka1		Slc7a14					Tceal6	Adamts1	R3hdm2									Pafah1b1				Ralyl	Pfn1		Apbb2		Stx1b	Akap6							Pja2								Tyro3			Ids
Slc29a3		Sobp					Atp6v1d	Fermt2	Adarb1									Snx30				Vamp2	Rps20		Tpm1		Rbfox2	Npas2							Ppp1r9a								Cystm1			Atp2b1
Apobec3		A930011O12Rik					Zbtb18	Akr1a1	Susd4									Eps15				Rasgef1a	Rpl35a		Fry		Rnf187	Pianp							Rtn3								Inpp5f			Basp1
Arpc1b		Myh10					Il1rapl1	Hnrnpf	Dynll2									Dync1li2				Fam49a	Rps3		Tpd52		Ppm1a	Itm2c							Ano3								Srcin1			Lgi1
Rps23		Faah					Gpm6a	Cr1l	D10Bwg1379e									Sbds				Nrcam	Rpl13a		Shisa5		Ryr3	6330403K07Rik							Smim13								Tmbim6			Adam22
Slc9a9		Car11					Akap11	Gm10076	Mapre3									Cdk19				Acvr2a	Timp2		Vamp3		Gnao1	Dgat2							Slc39a10								Kat2b			Dmxl2
Trib1		Miat					Trpm3	Rpl8	Cntn4									RP23-199B2.4				Camkv	Lrp1		Mllt4			Sult4a1							Ppme1								Ado			Rspo3
Wasf2		Pcdha2					Fam155a	Ralbp1	Srpk2									Selk				Golga7b	Mbnl1		Dlc1			Arhgap26							Gabarapl1								Fbxo7			Slc6a17
Tmcc3		Snap91					Aldoa	Pkp4	Crmp1									Txndc16				Nbea	Rpl26		Tpm3-rs7			Slmap							St8sia3								Abhd17b			Nceh1
Rps11		Akap11					Cyfip2	Rhoa	Lrp11									Magt1				Synj1	Rps15a		Dusp3			Cacna1b							2019-09-03								Clasp2			Atp2a2
Syngr2		Zcchc18					Rilpl1	Adam10	Habp4									Zfp280c				Slc38a1	Akap13		Sh3bgrl			Chst1							Mkl2								Eid1			Synj1
Rps25		Syt16					C2cd2l	Leprot	Gsk3b									Atg3				Nat8l	Bin1		Tpm3			Ppp3cb							Fam115a								1810037I17Rik			Serinc1
Rps19		Ptprs					Tenm1	Rpl18a	Cdh2									Ank				Nlk	Sft2d1		S100a13			Rasgrp2							Ids								Snx15			Kif1a
Zeb2		Rnf165					Slc2a13	Snx3	Kif1a									Gabarapl2				Dnajc5	Smad7		Fermt2			Grik5							Dlgap1								Hid1			Nrcam
Ppcdc		Gdap1					Got1	Chmp3	Serinc1									Fam168a				Rasl11b	Ubash3b		Lima1			Pdpk1							Atp6v1a								Klf13			Ensa
Nfe2l2		Homer2					Faah	Gng5	Psip1									Wnk1				Scn8a	Syngr1		Capn2			Mllt11							Serpini1								Golga7			Kcnq2
Daglb		Nptn					Ptchd4	Vps36	Pkm									Ankib1				Lrrtm1	Rpl13-ps3		Rpl8			Syt7							Akap6								Cdk5			Rtn3
Syngr1		Stim2					Pja2	Tpd52	Htr2c									Dlg1				Gabra2	Irf2bp2		Cr1l			Cyfip2							Susd4								Pea15a			Dnajc6
Rps15a		Scn2b					Pde4dip	Ccser2	Zfp365									Aig1				Trim32	Eef1a1		Mprip			Map7d2							Tenm2								Spock3			Adam23
Rnaset2b		Dapk1					Ntrk3	Sptan1	Kif5a									Paip2				Chd5	Nfkb1		Pde2a			Trim37							Magee1								2019-03-08			Tiam1
Dock4		Gabbr2					Atp6v1b2	Ctcf	Mfsd6									Dnm3				Trank1	Zfand5		Capns1			2900011O08Rik							Syngr3								Snx1			Ypel5
Smad7		Ppp1r9a					Ftx	Pkig	Ids									2310044G17Rik				Shank1	Rasgrp3		Pdxk			Pi4ka							Pip5k1c								Agap1			Ank2
Ipcef1		Mapk8ip2					Crmp1	Dynll1	Rabep1									Rab10				Hdgfrp3	Sipa1		Arpc3			Klhl2							Nceh1								Tulp4			Mir22hg
Stat3		Bai2					Nlgn1	Nfic										Prkacb				Scn1b	Fli1		Agrn			Atp2a2							Abi2								Clip3			Atp2b4
Gm7536		Actr2					Grm7	Rap1b										Foxn3				Gng2	Basp1		Sypl			Eef1a2							Snx10								Urm1			Smarca1
Bin1		Prkar1b					Celf5	Arid5b										Tjp2				Adcy8	Rpl34		Rpl41			Ramp1							Lgi1								Mast4			Atp6v1a
Gm5148		Cadm2					D10Bwg1379e	Rpl34										Smad7				Car11	Gm2000		Gng5			Ssbp2							Rapgefl1								Cyth1			Chl1
Rpl35a		Nrcam					Pak3	Aplp2										Mpp5				Magee1	Rps27a		Kif5b			Gabrg2							B4galt6								Klhl2			Mfsd6
Gpx1		Kcnb2					Btbd9	H2afv										Mrfap1				Cacna2d3	Rps21		Mcf2l			Calm1							Gnao1								Abcg1			Unc5c
Rpl4		Crim1					Dlgap2	Tob1										Gtf2h1				Atp6v1c1	Gm17511		Rps20			Abi2							Rab3c								Fbxl5			Lin7a
Fam134b		Kcnq1					Pcdh17	S100a13										4930402H24Rik				Slc3a1	Rps14		Arpc2			Vdac1							Stk32c								Eps15			Dgat2
Rpl26		Csrnp3					A830018L16Rik	Atp5j										Vldlr				Sidt1	Fscn1		Rpl9			Pld3							Prkacb								Eml2			Dlg3
Rps10		Schip1					Gls	Rps3										Atxn7l3b				Atp1a1	Rpl13		Hip1			Hlf							Stxbp5l								Ank			Syt16
Rpl13a		Soga3					Lrrc4	1810037I17Rik										Arhgef2				Mpped1	Arpc2		Clip1			Bai1							Mapk1								Sys1			Gprasp1
Ddx26b		Nov					Fam19a1	Klf7										Hipk2				Gabra5	Rpl10		Mxd4			Ica1							Atp6v1d								Magt1			Cntn6
Pik3r1		Syt5					Sorbs2	Psma6										Acap2				C1qtnf4	Rps11		Elovl7			Rabgap1l							Ppp1r1a								Bcap31			Mkl2
Camk1d		Rab6b					Pnmal1											Smim15				Sv2a	Daglb		Tspan5			Lphn2							Unc5d								Tjp2			Mef2c
Rps3		Rnf150					Syn1											Lpgat1				Atp2a2	Tmcc3		Rps19			Rrp1							Slitrk5								Hsp90ab1			Cap2
Id2		Gabbr1					Nkain3											Ktn1				Nol4	Csmd3		Gm10076			Susd4							Zdhhc8								Limch1			Tmem38a
Mak		Pja2					Soga3											Slk				Lonrf2	Rpl23		Myo10			Ubqln2							Nrcam								Cstb			Adcy2
Acer3		Atp2b3					Gfod1											Sh3kbp1				Purb	Rps25		Fam13c			Tln2							Zyg11b								Nbas			Kcna1
Rps27		Nrxn1					Pclo											Ddrgk1				Syt16	Nuak1		Snx3			Tro							Tenm4								Fam168a			Kif21a
Rpl13		Tmem59l					Trim9											Pdcd6ip				Cd200	Rps3a2		Gm7536			Lphn1							Map7d2								Rnf141			Mapt
Rps13		Jph4					Grina															Flywch1	Gm7536		Psme1			2210016L21Rik							Gabbr1								Cdc42bpa			Nmt2
Lrch1		Gpm6a					Syt16															Creg2	Rps10		Ifi27			Tyro3							Atp6ap2								Selk			Epb4.1l1
Clta		Cds1					Tmem38a															Cdk14	D15Ertd621e		Anp32a			C2cd5							Tspan5								Gde1			Sorl1
Numb		Unc13a					Scn2b															Tmx4	Lrrc58		Sptan1			Asns							Necab1								Wbp2			Ppm1k
Gpr133		Smim13					Tnik															Mras	Rps3a1		Tapbp			Gprasp1							Cadps								Epn2			Atcay
Rpl11		Reep1					Tmem150c															Diras2	Gm11808		Adipor1			Med26							Gng2								Inf2			Nat8l
Rps28		Bai1					Hook1															Usmg5	Lrch1		1810037I17Rik			Prkar1b							Tusc3								Npc1			Ubr3
Rpl34		Cnih3					Map9															Ube2ql1	Rpl10a		Gm9846			Chga							Stau2								Wnk1			Fam171b
Itm2b		Syn1					Fam3c															2019-09-06	Gnb2l1		Ppp1r2			Pds5b							Tmx4								Sbf1			Gucy1b3
Eef1a1		Plcb1					Asns															Asph	Fam134b		Rsu1			Clstn1							Got1								Vbp1
C330021F23Rik		Zeb2					Slc4a10															B3galnt1	Rps13		Hprt			Gdap1							Clstn2								Schip1
Rpl30		Kifap3					Dpp6															Chchd10	Ptpn1		Hmg20b			Aak1							Ppm1l								Trp53bp2
Rpl39		9530059O14Rik					Cpne4															Camkk1	Ehd4		Rps8			Abat							Amph								Rab10
Gm2000		Atp2b2					Map2															Fam19a2	Rpl11		Rps27l			Kifc2							Napg								Dpysl2
Nr4a1		Cadm3					Sipa1l1															Nceh1	Tpt1		Nfic			Lancl1							Hspa4l								Eif4h
Rps20		Gaa					Ywhab															Mapk8ip2	Rpl5		Aplp2			Kpna1							Nfe2l1								Acap2
Fchsd2		Stmn2					Atp6v0e2															Kcnq2	Rpl37		Tpt1			AI314180							Fam171b								Smad7
Rpl37a		Sult4a1					Car12															Faim2	Rps8		Chmp3			Gpi1							Gria1								Tpst1
Vmp1		Plxna4					Kcnq1															Gabra3	Ski		Rps27			Nckap1							Glrb								Add3
Tbc1d9		Nrn1					N28178															Atp6v0e2	Pnp		Mier1										Sez6l2								Sbds
Gm12166		Pacsin1					Dab1															Raph1	Zfp622		Adam10										Mboat7								Stard3nl
Rpl37		Phyhip					Dock10															Usp14	Rps28		Leprot										Mfsd6								Fnta
Rpl10-ps3		St8sia1					Stxbp1															Bai1	Rps23		Arl2bp										Ppp1r7								Grm3
Etf1		Magi2					Nfib															Scn2b	Scoc		Fam221b																		Ppp2r2a
Marcksl1		Hook1					Rprm															Adcy1	Ddx5		Ybx1																		Slc20a2
Rps3a1		Syngr3					Gabrb1															Dgke	Gtf2h2		2019-09-11																		Prkcz
Ankrd44		Svop					Sgsm2															Syt7	Sh3glb1		Rps29																		Arap2
Rpl22		Ano3					Chst9															Ssx2ip	Rps7		Ldha																		Rassf2
Gna13		Ap2b1					Kcnq3															Cntn1	Nrip1		Ccser2																		Ankib1
4933426M11Rik		Lsamp					Tanc1															Maged1	Mtdh		Cxx1a																		Papss1
Dock11		Pcsk2					Spock3															Zyg11b	Rpl37a		Txn1																		Dnajc19
Rps15		Lphn1					Pcsk1n															Ngfrap1	Rps26		Rpl22																		Foxn3
Cttnbp2nl		Dmtn					Dock3															Ptprt	Rpl21		Ctcf																		Zfp706
Npc2		Aak1					Fstl4															Atpif1	Elf1		Dynll1																		Amd1
Lrp1		Fbxl16					Celf1															Tcf25	Ptbp3		Rps15																		Tkt
Mgat5		Caln1					Clvs2															Mfsd4	Rps19		Rpl31																		Sh3bp5
Dgkd		Nptx1					Ppm1e															Gprasp2	Ddx3x		Rpl27a																		2310044G17Rik
Hist1h1c		Kit					Opcml															Kifc2	Hmgb2		Rpl7																		2019-09-02
Mbnl1		Scg2					Snrpn															Mdh2	Lamp2		Rpl26																		Hipk2
Wdr89		Rab3a					Cntn5															Tspyl1	Rpl4		Pkig																		Dync1li2
Ddx3x		Tenm4					Ppp2r2c															Arf3	Rps15		Sod1																		Snx30
Ddx5		Arl15					Bri3bp															Osbpl6	Rpl22		Rap1b																		Atg3
Rps26		Ywhag					Snap47															Pfkp	Eef1b2		Smarca2																		Zeb2
Hivep3		Celf1					Dmxl2															Matk	Camk1		Nfe2l1																		RP23-199B2.4
Rps6		Camta2					Ube2e2															Isca1	Rpl6		Ralbp1																		Add1
Rimklb		Hpcal4					Ncor1															Fam73a	Marcksl1		Shfm1																		Mpp5
Gm9846		Camta1					Stim2															B4galt6	Pik3r1		Rpl27																		Sc5d
Ctla4		Rabgap1l					Plekha2															Pten	Rpl27a		Rpl14																		Paip2
Wnk1		6330403K07Rik					Syt4															Bai3	Frmd4a		Chmp5																		Phyhipl
Rps14		A030009H04Rik					Hecw1															Ppm1k	Gm5093		Txndc17																		Gas7
Gm11808		Sowaha					Dtd1															Rnf208	C330021F23Rik		Sdcbp																		Aig1
Tpt1		Rtn3					Mpped2															Sgip1	Rps18		Rpl34																		Tecr
Ptbp3		Pls3					Aak1															Gnao1	Psap		Rpl37																		Mrfap1
Rpl5		Ank3					Agap2															Pde2a	Ophn1		Rpl37a																		Pafah1b1
Timp2		Map9					Anks1b															Ccdc92	Fchsd2		Klhl5																		Smim15
Tln1		Nceh1					Gprasp1															Slc2a3	Rps16		Vps36																		Itsn2
Scoc		Cpt1c					Cntnap5b															Wipf3	Rpl17		Rabac1																		Txndc16
Inpp4b		Cacng3					Ngfrap1															Slc25a14	Rpl18		Rpl35a																		Gabarapl2
Nrip1		Fbxo41					Hpcal4															Mfsd6	Rpl14		Tprgl																		Gabarap
Zfand5		Tmem179					Shisa6															Tiam1	Gramd1a		Rpl18a																		Slk
Pnrc1		Cplx2					Zbtb20															Bsn	Tapbp		Psma7																		Arhgef28
Gtf2h2		Snph					Dync1i1															Vdac1	Usp2		Rps16																		Ddrgk1
Frmd4a		Dock9					Pcdha2															Smyd2	Rps5		Snrpb																		Cpd
Wsb1		Usp46					Npdc1															Nicn1	Comt		Gm11808																		Rexo2
Rpl18		Atl1					Sobp															Mpv17l	Ptpre		Atp5j																		Cadm4
Chd9		Gucy1a2					Sptb															Dennd5b	Tln1		Rps17																		Emc10
Elf1		Dbn1					Akap6															Cpeb3	P4ha1		Ptbp3																		Atp9a
Pros1		Nedd4l					Ip6k2															Zc2hc1a	Etf1		Hnrnpf																		Dst
Chd7		D10Bwg1379e					Tro															Tmsb10	Gdi2		Arl6ip5																		Dnm3
Sft2d1		Kcnt2					Nalcn															Zbtb7a	Ogfrl1		Rpl23																		Dlg1
Mtdh		2019-09-03					Ccdc112															Bri3bp	St3gal5		Oaz2																		Cdk19
Asah1		Cdk17					Plekha5															Eif1b	Actr3		Klf7																		Lmbrd1
Clip1		Syp					Kirrel3																Chd7		Rdx																		Hiat1
Rps21		Mapk1					Fam49a																Clk1		H2afv																		Tm2d2
Ulk2		Astn1					Slitrk5																Dock10		Rps3a1																		Pgp
Rap1gds1		Akt3					Prkacb																		Uqcrb																		Dazap2
Rpl13-ps3		Ralgapa1					Dhx33																		Rps18																		Stx4a
Tbc1d5		Eml5					Ywhaz																		Psma6																		Pdcd6ip
Evi2a		Pde4dip					Mapk10																		Mir682																		Insig1
Rps3a2		Scg5					Sort1																		Lman1																		Acaa1a
Mir682		Arhgef28					Cacnb2																		Zfand6																		2510003E04Rik
Arih1		Slc8a2					Kifap3																																				Ddx1
Rnf216		Gls					Ptprd
Gm26573		Fam115a					Serp2
Dip2b		Unc79					Adam22
Myh9		Pygo1					Gnal
Git2		Sh3rf1					Atrnl1
Lims1		Atp2a2					Arxes1
Tab2		Clstn1					Cacna1c
		Fam171b					Sgip1
		Herc3					Diras2
		Jakmip2					Dgkb
		Calm3					Herc1
		Scn1b					Fam171b
		Ppp2r2b					Rragd
		Kif21a					Frmpd4
		Celf4					Osbpl6
		Pdxp					Ank2
		Kmt2a					Tmx4
		Psd					Unc13a
		Syt13					Klhl29
		Ube2ql1					Fut9
		Nefm					Scn1a
		Calm2					Tomm70a
		Map1a					Schip1
		Sptan1					Stxbp5
		Nat8l					Ensa
		Nat14					Madd
		B3galt2					Epha5
		Rock2					Bicd1
		Agap2					2210016L21Rik
		Srgap3					Dtna
		Ssx2ip					5830428H23Rik
		Foxg1					Cers6
		Slc4a10					Sbno1
		Pfn2					Serinc1
		Chd5					Tacc1
		Ctxn1					Pkig
		Abi2					Sms
		Gm10419					Hsph1
		Agtpbp1					Car10
		Purg					2510003E04Rik
		Uchl1					Kcnq2
		Psd3					Nol4
		2900011O08Rik					Samd12
		Arf1					Nceh1
		Scn3a					Atl1
		Gpr158					Extl2
		Dpp6					2019-03-06
		Syne1					Myh10
		Tubb2a					Ccser1
		Ppp2r2c					Pde7b
		Npdc1					Wdr7
		Apba2					Rock2
		Prkca					Etnk1
		Tmem130					Rabgap1l
		9330159F19Rik					Zfp148
		Slc3a1					Rtn3
		Tusc3					Glis3
		Atrn					Jakmip2
		Zyg11b					Xkr4
		Caly					Jhdm1d
		Ndrg3					Large
		Trim9					Zc3h6
		Trim37					Psmc1
		Rab40b					Zyg11b
		Snrpn					Klf9
		Meis2					Tspan5
		Tcf4					Timm9
		N28178					Dnajb6
		Zc3h13					Mgea5
		A830039N20Rik
		Dock3
		Pip5k1b
		Upp2
		Rtf1
		Ctnnd2
		Lrp11
		Stxbp1
		Hsph1
		Napg
		Prnp
		Akap5
		Rab6a
		Rasl11b
		Maged1
		Uhrf1bp1l
		B4galt6
		Nrsn1
		Atp6v1a
		Map7d2
		Matr3
		Serpini1
		Ankrd12
		Usp34
		Hspa4l
		Dlg4
		Ylpm1
		Agfg2
		Dagla
		Dzip3
		Ywhah
		Clstn2
		Dip2c
		Lrrc40
		Atp6v1b2
		Zbtb20
		Ksr1
		Bcr
		Tmem191c
		Ptpn5
		Cdk14
		Ube3c
		Spon1
		Sgtb
		Ank2
		Tnrc6c
		Etnk1
		Klc1
		Pi4ka
		Eef1a2
		Cnr1
		Ywhaz
		Thra
		Got1
		Gcc2
		Trio
		Pde4a
		Dlgap4
		Atrx
		Tmem132b
		Micu3
		Fam81a
		1700020I14Rik
		Prrc2b
		Serinc1
		Pcnx
		Cnrip1
		Dnm1l
		Ocrl
		Atp1a1
		Nlgn3
		Tspyl4
		Gabarapl1
		Alcam
		Grina
		Coro2b
		A830018L16Rik
		Rabl6
		Wnk2
[truncated: 6 more columns]
