# Supplementary material for: Systems spatiotemporal dynamics of traumatic brain injury at single-cell resolution reveals humanin as a therapeutic target
Source: Cell Mol Life Sci. 2022 Aug 11;79(9):480. doi: 10.1007/s00018-022-04495-9 (PMC9372016; doi:10.1007/s00018-022-04495-9)
Supplement: Supplementary file 6 — (XLSX 18 KB) [file 18_2022_4495_MOESM6_ESM.xlsx]

## Sheet: Sheet1
Supplementary Table 5. Number of DEGs per cell type cluster.
Tissue	Timepoint	Cell Type	DEG Method	Number of DEGs
Blood	24hrs	CD4 T Cells	Subset 100 Cells	6
Blood	24hrs	CD8 T Cells	Subset 100 Cells	6
Blood	24hrs	Ly6c+ Monocytes	Subset 100 Cells	5
Blood	24hrs	Natural Killer Cells	Subset 100 Cells	5
Blood	24hrs	B Cells	Subset 100 Cells	3
Blood	24hrs	Granulocytes	Subset 100 Cells	3
Blood	24hrs	Treml4+ Monocytes	Subset 100 Cells	3
Blood	24hrs	Megakaryocytes	Subset 100 Cells	2
Frontal Cortex	24hrs	Astrocytes	Subset 100 Cells	26
Frontal Cortex	24hrs	Layer 2/3 Neurons	Subset 100 Cells	26
Frontal Cortex	24hrs	Pericytes	Subset 100 Cells	13
Frontal Cortex	24hrs	Endothelial	Subset 100 Cells	11
Frontal Cortex	24hrs	Oligodendrocytes	Subset 100 Cells	8
Frontal Cortex	24hrs	Activated Microglia	Subset 100 Cells	6
Frontal Cortex	24hrs	Piriform Cortex	Subset 100 Cells	5
Frontal Cortex	24hrs	Oligo Precursor Cells	Subset 100 Cells	4
Frontal Cortex	24hrs	Interneurons Nrip3+	Subset 100 Cells	3
Frontal Cortex	24hrs	Neurogenesis1	Subset 100 Cells	2
Frontal Cortex	24hrs	Neurogenesis2	Subset 100 Cells	2
Frontal Cortex	24hrs	Macrophage	Subset 100 Cells	1
Frontal Cortex	24hrs	Smooth Muscle Cells	Subset 100 Cells	1
Frontal Cortex	24hrs	New Oligodendrocytes	Subset 100 Cells	0
Frontal Cortex	24hrs	Microglia	Subset 100 Cells	0
Frontal Cortex	24hrs	Interneurons Calb2+	Subset 100 Cells	0
Frontal Cortex	24hrs	Interneurons Dlk1+	Subset 100 Cells	0
Frontal Cortex	24hrs	Interneurons Foxp1+	Subset 100 Cells	0
Frontal Cortex	24hrs	Interneurons Foxp2+	Subset 100 Cells	0
Frontal Cortex	24hrs	Interneurons Sst+	Subset 100 Cells	0
Frontal Cortex	24hrs	Interneurons Tac1+	Subset 100 Cells	0
Frontal Cortex	24hrs	Interneurons Trh+	Subset 100 Cells	0
Frontal Cortex	24hrs	Interneurons Vip+	Subset 100 Cells	0
Frontal Cortex	24hrs	Layer 6 Neurons	Subset 100 Cells	0
Frontal Cortex	24hrs	Neurons Zscan20+	Subset 100 Cells	0
Hippocampus	24hrs	Astrocytes	Subset 100 Cells	11
Hippocampus	24hrs	Activated Microglia	Subset 100 Cells	9
Hippocampus	24hrs	Microglia	Subset 100 Cells	7
Hippocampus	24hrs	Macrophage	Subset 100 Cells	6
Hippocampus	24hrs	Smooth Muscle Cells	Subset 100 Cells	6
Hippocampus	24hrs	Entorhinal Cortex	Subset 100 Cells	5
Hippocampus	24hrs	Oligodendrocytes	Subset 100 Cells	3
Hippocampus	24hrs	Endothelial	Subset 100 Cells	2
Hippocampus	24hrs	Ependymal Cells	Subset 100 Cells	2
Hippocampus	24hrs	Neurogenesis2	Subset 100 Cells	2
Hippocampus	24hrs	New Oligodendrocytes	Subset 100 Cells	2
Hippocampus	24hrs	Pericytes	Subset 100 Cells	2
Hippocampus	24hrs	CA1 Pyramidal Neurons (v)	Subset 100 Cells	1
Hippocampus	24hrs	Cajal Retzius	Subset 100 Cells	1
Hippocampus	24hrs	Choroid Plexus Epithelial	Subset 100 Cells	1
Hippocampus	24hrs	Dentate Gyrus	Subset 100 Cells	1
Hippocampus	24hrs	Fibroblasts	Subset 100 Cells	1
Hippocampus	24hrs	Interneurons	Subset 100 Cells	1
Hippocampus	24hrs	Neurogenesis1	Subset 100 Cells	1
Hippocampus	24hrs	Oligo Precursor Cells	Subset 100 Cells	1
Hippocampus	24hrs	CA1 Pyramidal Neurons (d)	Subset 100 Cells	0
Hippocampus	24hrs	CA 2/3 Pyramidal Neurons	Subset 100 Cells	0
Hippocampus	24hrs	Subiculum	Subset 100 Cells	0
Blood	7days	CD8 T Cells	Subset 100 Cells	16
Blood	7days	CD4 T Cells	Subset 100 Cells	5
Blood	7days	Ly6c+ Monocytes	Subset 100 Cells	4
Blood	7days	Natural Killer Cells	Subset 100 Cells	4
Blood	7days	B Cells	Subset 100 Cells	2
Blood	7days	Treml4+ Monocytes	Subset 100 Cells	1
Blood	7days	Granulocytes	Subset 100 Cells	0
Blood	7days	Megakaryocytes	Subset 100 Cells	0
Frontal Cortex	7days	Neurogenesis2	Subset 100 Cells	12
Frontal Cortex	7days	Activated Microglia	Subset 100 Cells	9
Frontal Cortex	7days	Interneurons Dlk1+	Subset 100 Cells	6
Frontal Cortex	7days	Neurogenesis1	Subset 100 Cells	5
Frontal Cortex	7days	Astrocytes	Subset 100 Cells	2
Frontal Cortex	7days	Endothelial	Subset 100 Cells	2
Frontal Cortex	7days	Oligo Precursor Cells	Subset 100 Cells	2
Frontal Cortex	7days	New Oligodendrocytes	Subset 100 Cells	2
Frontal Cortex	7days	Microglia	Subset 100 Cells	2
Frontal Cortex	7days	Interneurons Calb2+	Subset 100 Cells	2
Frontal Cortex	7days	Layer 2/3 Neurons	Subset 100 Cells	2
Frontal Cortex	7days	Pericytes	Subset 100 Cells	1
Frontal Cortex	7days	Oligodendrocytes	Subset 100 Cells	1
Frontal Cortex	7days	Interneurons Nrip3+	Subset 100 Cells	1
Frontal Cortex	7days	Smooth Muscle Cells	Subset 100 Cells	1
Frontal Cortex	7days	Interneurons Foxp2+	Subset 100 Cells	1
Frontal Cortex	7days	Neurons Zscan20+	Subset 100 Cells	1
Frontal Cortex	7days	Piriform Cortex	Subset 100 Cells	0
Frontal Cortex	7days	Macrophage	Subset 100 Cells	0
Frontal Cortex	7days	Interneurons Foxp1+	Subset 100 Cells	0
Frontal Cortex	7days	Interneurons Sst+	Subset 100 Cells	0
Frontal Cortex	7days	Interneurons Tac1+	Subset 100 Cells	0
Frontal Cortex	7days	Interneurons Trh+	Subset 100 Cells	0
Frontal Cortex	7days	Interneurons Vip+	Subset 100 Cells	0
Frontal Cortex	7days	Layer 6 Neurons	Subset 100 Cells	0
Hippocampus	7days	Dentate Gyrus	Subset 100 Cells	4
Hippocampus	7days	Astrocytes	Subset 100 Cells	3
Hippocampus	7days	Smooth Muscle Cells	Subset 100 Cells	3
Hippocampus	7days	Choroid Plexus Epithelial	Subset 100 Cells	3
Hippocampus	7days	Activated Microglia	Subset 100 Cells	2
Hippocampus	7days	Microglia	Subset 100 Cells	2
Hippocampus	7days	Macrophage	Subset 100 Cells	2
Hippocampus	7days	Oligodendrocytes	Subset 100 Cells	2
Hippocampus	7days	Endothelial	Subset 100 Cells	2
Hippocampus	7days	Pericytes	Subset 100 Cells	2
Hippocampus	7days	Cajal Retzius	Subset 100 Cells	2
Hippocampus	7days	Oligo Precursor Cells	Subset 100 Cells	2
Hippocampus	7days	CA1 Pyramidal Neurons (d)	Subset 100 Cells	2
Hippocampus	7days	Subiculum	Subset 100 Cells	2
Hippocampus	7days	Neurogenesis2	Subset 100 Cells	1
Hippocampus	7days	New Oligodendrocytes	Subset 100 Cells	1
Hippocampus	7days	CA1 Pyramidal Neurons (v)	Subset 100 Cells	1
Hippocampus	7days	Fibroblasts	Subset 100 Cells	1
Hippocampus	7days	Interneurons	Subset 100 Cells	1
Hippocampus	7days	Neurogenesis1	Subset 100 Cells	1
Hippocampus	7days	Entorhinal Cortex	Subset 100 Cells	0
Hippocampus	7days	Ependymal Cells	Subset 100 Cells	0
Hippocampus	7days	CA 2/3 Pyramidal Neurons	Subset 100 Cells	0
Hippocampus	24hrs	Astrocytes	p-value < 0.01	585
Hippocampus	24hrs	Activated Microglia	p-value < 0.01	517
Hippocampus	24hrs	Microglia	p-value < 0.01	439
Hippocampus	24hrs	Macrophage	p-value < 0.01	203
Hippocampus	24hrs	Smooth Muscle Cells	p-value < 0.01	143
Hippocampus	24hrs	Entorhinal Cortex	p-value < 0.01	222
Hippocampus	24hrs	Oligodendrocytes	p-value < 0.01	272
Hippocampus	24hrs	Endothelial	p-value < 0.01	310
Hippocampus	24hrs	Ependymal Cells	p-value < 0.01	51
Hippocampus	24hrs	Neurogenesis2	p-value < 0.01	175
Hippocampus	24hrs	New Oligodendrocytes	p-value < 0.01	208
Hippocampus	24hrs	Pericytes	p-value < 0.01	43
Hippocampus	24hrs	CA1 Pyramidal Neurons (v)	p-value < 0.01	135
Hippocampus	24hrs	Cajal Retzius	p-value < 0.01	54
Hippocampus	24hrs	Choroid Plexus Epithelial	p-value < 0.01	79
Hippocampus	24hrs	Dentate Gyrus	p-value < 0.01	143
Hippocampus	24hrs	Fibroblasts	p-value < 0.01	52
Hippocampus	24hrs	Interneurons	p-value < 0.01	194
Hippocampus	24hrs	Neurogenesis1	p-value < 0.01	74
Hippocampus	24hrs	Oligo Precursor Cells	p-value < 0.01	305
Hippocampus	24hrs	CA1 Pyramidal Neurons (d)	p-value < 0.01	174
Hippocampus	24hrs	CA 2/3 Pyramidal Neurons	p-value < 0.01	88
Hippocampus	24hrs	Subiculum	p-value < 0.01	159
Hippocampus	24hrs	Astrocytes	p Adj < 0.05	449
Hippocampus	24hrs	Activated Microglia	p Adj < 0.05	402
Hippocampus	24hrs	Microglia	p Adj < 0.05	146
Hippocampus	24hrs	Macrophage	p Adj < 0.05	14
Hippocampus	24hrs	Smooth Muscle Cells	p Adj < 0.05	6
Hippocampus	24hrs	Entorhinal Cortex	p Adj < 0.05	5
Hippocampus	24hrs	Oligodendrocytes	p Adj < 0.05	191
Hippocampus	24hrs	Endothelial	p Adj < 0.05	138
Hippocampus	24hrs	Ependymal Cells	p Adj < 0.05	2
Hippocampus	24hrs	Neurogenesis2	p Adj < 0.05	2
Hippocampus	24hrs	New Oligodendrocytes	p Adj < 0.05	4
Hippocampus	24hrs	Pericytes	p Adj < 0.05	2
Hippocampus	24hrs	CA1 Pyramidal Neurons (v)	p Adj < 0.05	1
Hippocampus	24hrs	Cajal Retzius	p Adj < 0.05	1
Hippocampus	24hrs	Choroid Plexus Epithelial	p Adj < 0.05	5
Hippocampus	24hrs	Dentate Gyrus	p Adj < 0.05	4
Hippocampus	24hrs	Fibroblasts	p Adj < 0.05	1
Hippocampus	24hrs	Interneurons	p Adj < 0.05	1
Hippocampus	24hrs	Neurogenesis1	p Adj < 0.05	1
Hippocampus	24hrs	Oligo Precursor Cells	p Adj < 0.05	70
Hippocampus	24hrs	CA1 Pyramidal Neurons (d)	p Adj < 0.05	2
Hippocampus	24hrs	CA 2/3 Pyramidal Neurons	p Adj < 0.05	0
Hippocampus	24hrs	Subiculum	p Adj < 0.05	2
Hippocampus	7days	Astrocytes	p-value < 0.01	152
Hippocampus	7days	Activated Microglia	p-value < 0.01	213
Hippocampus	7days	Microglia	p-value < 0.01	169
Hippocampus	7days	Macrophage	p-value < 0.01	93
Hippocampus	7days	Smooth Muscle Cells	p-value < 0.01	99
Hippocampus	7days	Entorhinal Cortex	p-value < 0.01	163
Hippocampus	7days	Oligodendrocytes	p-value < 0.01	133
Hippocampus	7days	Endothelial	p-value < 0.01	169
Hippocampus	7days	Ependymal Cells	p-value < 0.01	35
Hippocampus	7days	Neurogenesis2	p-value < 0.01	93
Hippocampus	7days	New Oligodendrocytes	p-value < 0.01	143
Hippocampus	7days	Pericytes	p-value < 0.01	48
Hippocampus	7days	CA1 Pyramidal Neurons (v)	p-value < 0.01	132
Hippocampus	7days	Cajal Retzius	p-value < 0.01	70
Hippocampus	7days	Choroid Plexus Epithelial	p-value < 0.01	99
Hippocampus	7days	Dentate Gyrus	p-value < 0.01	230
Hippocampus	7days	Fibroblasts	p-value < 0.01	96
Hippocampus	7days	Interneurons	p-value < 0.01	68
Hippocampus	7days	Neurogenesis1	p-value < 0.01	96
Hippocampus	7days	Oligo Precursor Cells	p-value < 0.01	132
Hippocampus	7days	CA1 Pyramidal Neurons (d)	p-value < 0.01	94
Hippocampus	7days	CA 2/3 Pyramidal Neurons	p-value < 0.01	62
Hippocampus	7days	Subiculum	p-value < 0.01	108
Hippocampus	7days	Astrocytes	p Adj < 0.05	63
Hippocampus	7days	Activated Microglia	p Adj < 0.05	66
Hippocampus	7days	Microglia	p Adj < 0.05	26
Hippocampus	7days	Macrophage	p Adj < 0.05	2
Hippocampus	7days	Smooth Muscle Cells	p Adj < 0.05	4
Hippocampus	7days	Entorhinal Cortex	p Adj < 0.05	2
Hippocampus	7days	Oligodendrocytes	p Adj < 0.05	77
Hippocampus	7days	Endothelial	p Adj < 0.05	54
Hippocampus	7days	Ependymal Cells	p Adj < 0.05	0
Hippocampus	7days	Neurogenesis2	p Adj < 0.05	1
Hippocampus	7days	New Oligodendrocytes	p Adj < 0.05	1
Hippocampus	7days	Pericytes	p Adj < 0.05	2
Hippocampus	7days	CA1 Pyramidal Neurons (v)	p Adj < 0.05	1
Hippocampus	7days	Cajal Retzius	p Adj < 0.05	3
Hippocampus	7days	Choroid Plexus Epithelial	p Adj < 0.05	16
Hippocampus	7days	Dentate Gyrus	p Adj < 0.05	6
Hippocampus	7days	Fibroblasts	p Adj < 0.05	1
Hippocampus	7days	Interneurons	p Adj < 0.05	1
Hippocampus	7days	Neurogenesis1	p Adj < 0.05	1
Hippocampus	7days	Oligo Precursor Cells	p Adj < 0.05	15
Hippocampus	7days	CA1 Pyramidal Neurons (d)	p Adj < 0.05	2
Hippocampus	7days	CA 2/3 Pyramidal Neurons	p Adj < 0.05	0
Hippocampus	7days	Subiculum	p Adj < 0.05	2
Frontal Cortex	24hrs	Astrocytes	p-value < 0.01	897
Frontal Cortex	24hrs	Layer 2/3 Neurons	p-value < 0.01	462
Frontal Cortex	24hrs	Pericytes	p-value < 0.01	290
Frontal Cortex	24hrs	Endothelial	p-value < 0.01	586
Frontal Cortex	24hrs	Oligodendrocytes	p-value < 0.01	523
Frontal Cortex	24hrs	Activated Microglia	p-value < 0.01	665
Frontal Cortex	24hrs	Piriform Cortex	p-value < 0.01	224
Frontal Cortex	24hrs	Oligo Precursor Cells	p-value < 0.01	388
Frontal Cortex	24hrs	Interneurons Nrip3+	p-value < 0.01	126
Frontal Cortex	24hrs	Neurogenesis1	p-value < 0.01	205
Frontal Cortex	24hrs	Neurogenesis2	p-value < 0.01	177
Frontal Cortex	24hrs	Macrophage	p-value < 0.01	177
Frontal Cortex	24hrs	Smooth Muscle Cells	p-value < 0.01	61
Frontal Cortex	24hrs	New Oligodendrocytes	p-value < 0.01	78
Frontal Cortex	24hrs	Microglia	p-value < 0.01	198
Frontal Cortex	24hrs	Interneurons Calb2+	p-value < 0.01	106
Frontal Cortex	24hrs	Interneurons Dlk1+	p-value < 0.01	176
Frontal Cortex	24hrs	Interneurons Foxp1+	p-value < 0.01	112
Frontal Cortex	24hrs	Interneurons Foxp2+	p-value < 0.01	9
Frontal Cortex	24hrs	Interneurons Sst+	p-value < 0.01	6
Frontal Cortex	24hrs	Interneurons Tac1+	p-value < 0.01	27
Frontal Cortex	24hrs	Interneurons Trh+	p-value < 0.01	32
Frontal Cortex	24hrs	Interneurons Vip+	p-value < 0.01	46
Frontal Cortex	24hrs	Layer 6 Neurons	p-value < 0.01	9
Frontal Cortex	24hrs	Neurons Zscan20+	p-value < 0.01	10
Frontal Cortex	24hrs	Astrocytes	p Adj < 0.05	734
Frontal Cortex	24hrs	Layer 2/3 Neurons	p Adj < 0.05	26
Frontal Cortex	24hrs	Pericytes	p Adj < 0.05	20
Frontal Cortex	24hrs	Endothelial	p Adj < 0.05	355
Frontal Cortex	24hrs	Oligodendrocytes	p Adj < 0.05	370
Frontal Cortex	24hrs	Activated Microglia	p Adj < 0.05	457
Frontal Cortex	24hrs	Piriform Cortex	p Adj < 0.05	5
Frontal Cortex	24hrs	Oligo Precursor Cells	p Adj < 0.05	44
Frontal Cortex	24hrs	Interneurons Nrip3+	p Adj < 0.05	9
Frontal Cortex	24hrs	Neurogenesis1	p Adj < 0.05	9
Frontal Cortex	24hrs	Neurogenesis2	p Adj < 0.05	2
Frontal Cortex	24hrs	Macrophage	p Adj < 0.05	1
Frontal Cortex	24hrs	Smooth Muscle Cells	p Adj < 0.05	1
Frontal Cortex	24hrs	New Oligodendrocytes	p Adj < 0.05	0
Frontal Cortex	24hrs	Microglia	p Adj < 0.05	11
Frontal Cortex	24hrs	Interneurons Calb2+	p Adj < 0.05	0
Frontal Cortex	24hrs	Interneurons Dlk1+	p Adj < 0.05	0
Frontal Cortex	24hrs	Interneurons Foxp1+	p Adj < 0.05	0
Frontal Cortex	24hrs	Interneurons Foxp2+	p Adj < 0.05	0
Frontal Cortex	24hrs	Interneurons Sst+	p Adj < 0.05	0
Frontal Cortex	24hrs	Interneurons Tac1+	p Adj < 0.05	0
Frontal Cortex	24hrs	Interneurons Trh+	p Adj < 0.05	0
Frontal Cortex	24hrs	Interneurons Vip+	p Adj < 0.05	0
Frontal Cortex	24hrs	Layer 6 Neurons	p Adj < 0.05	0
Frontal Cortex	24hrs	Neurons Zscan20+	p Adj < 0.05	0
Frontal Cortex	7days	Astrocytes	p-value < 0.01	254
Frontal Cortex	7days	Layer 2/3 Neurons	p-value < 0.01	157
Frontal Cortex	7days	Pericytes	p-value < 0.01	87
Frontal Cortex	7days	Endothelial	p-value < 0.01	295
Frontal Cortex	7days	Oligodendrocytes	p-value < 0.01	196
Frontal Cortex	7days	Activated Microglia	p-value < 0.01	231
Frontal Cortex	7days	Piriform Cortex	p-value < 0.01	83
Frontal Cortex	7days	Oligo Precursor Cells	p-value < 0.01	237
Frontal Cortex	7days	Interneurons Nrip3+	p-value < 0.01	171
Frontal Cortex	7days	Neurogenesis1	p-value < 0.01	173
Frontal Cortex	7days	Neurogenesis2	p-value < 0.01	172
Frontal Cortex	7days	Macrophage	p-value < 0.01	107
Frontal Cortex	7days	Smooth Muscle Cells	p-value < 0.01	57
Frontal Cortex	7days	New Oligodendrocytes	p-value < 0.01	125
Frontal Cortex	7days	Microglia	p-value < 0.01	170
Frontal Cortex	7days	Interneurons Calb2+	p-value < 0.01	212
Frontal Cortex	7days	Interneurons Dlk1+	p-value < 0.01	344
Frontal Cortex	7days	Interneurons Foxp1+	p-value < 0.01	84
Frontal Cortex	7days	Interneurons Foxp2+	p-value < 0.01	184
Frontal Cortex	7days	Interneurons Sst+	p-value < 0.01	27
Frontal Cortex	7days	Interneurons Tac1+	p-value < 0.01	16
Frontal Cortex	7days	Interneurons Trh+	p-value < 0.01	97
Frontal Cortex	7days	Interneurons Vip+	p-value < 0.01	39
Frontal Cortex	7days	Layer 6 Neurons	p-value < 0.01	53
Frontal Cortex	7days	Neurons Zscan20+	p-value < 0.01	54
Frontal Cortex	7days	Astrocytes	p Adj < 0.05	139
Frontal Cortex	7days	Layer 2/3 Neurons	p Adj < 0.05	5
Frontal Cortex	7days	Pericytes	p Adj < 0.05	5
Frontal Cortex	7days	Endothelial	p Adj < 0.05	157
Frontal Cortex	7days	Oligodendrocytes	p Adj < 0.05	124
Frontal Cortex	7days	Activated Microglia	p Adj < 0.05	144
Frontal Cortex	7days	Piriform Cortex	p Adj < 0.05	0
Frontal Cortex	7days	Oligo Precursor Cells	p Adj < 0.05	59
Frontal Cortex	7days	Interneurons Nrip3+	p Adj < 0.05	71
Frontal Cortex	7days	Neurogenesis1	p Adj < 0.05	51
Frontal Cortex	7days	Neurogenesis2	p Adj < 0.05	12
Frontal Cortex	7days	Macrophage	p Adj < 0.05	0
Frontal Cortex	7days	Smooth Muscle Cells	p Adj < 0.05	1
Frontal Cortex	7days	New Oligodendrocytes	p Adj < 0.05	3
Frontal Cortex	7days	Microglia	p Adj < 0.05	49
Frontal Cortex	7days	Interneurons Calb2+	p Adj < 0.05	14
Frontal Cortex	7days	Interneurons Dlk1+	p Adj < 0.05	6
Frontal Cortex	7days	Interneurons Foxp1+	p Adj < 0.05	0
Frontal Cortex	7days	Interneurons Foxp2+	p Adj < 0.05	2
Frontal Cortex	7days	Interneurons Sst+	p Adj < 0.05	0
Frontal Cortex	7days	Interneurons Tac1+	p Adj < 0.05	0
Frontal Cortex	7days	Interneurons Trh+	p Adj < 0.05	5
Frontal Cortex	7days	Interneurons Vip+	p Adj < 0.05	0
Frontal Cortex	7days	Layer 6 Neurons	p Adj < 0.05	0
Frontal Cortex	7days	Neurons Zscan20+	p Adj < 0.05	1
Blood	24hrs	CD4 T Cells	p-value < 0.01	172
Blood	24hrs	CD8 T Cells	p-value < 0.01	258
Blood	24hrs	Ly6c+ Monocytes	p-value < 0.01	300
Blood	24hrs	Natural Killer Cells	p-value < 0.01	231
Blood	24hrs	B Cells	p-value < 0.01	131
Blood	24hrs	Granulocytes	p-value < 0.01	80
Blood	24hrs	Treml4+ Monocytes	p-value < 0.01	163
Blood	24hrs	Megakaryocytes	p-value < 0.01	164
Blood	24hrs	CD4 T Cells	p Adj < 0.05	141
Blood	24hrs	CD8 T Cells	p Adj < 0.05	127
Blood	24hrs	Ly6c+ Monocytes	p Adj < 0.05	43
Blood	24hrs	Natural Killer Cells	p Adj < 0.05	33
Blood	24hrs	B Cells	p Adj < 0.05	113
Blood	24hrs	Granulocytes	p Adj < 0.05	8
Blood	24hrs	Treml4+ Monocytes	p Adj < 0.05	12
Blood	24hrs	Megakaryocytes	p Adj < 0.05	2
Blood	7days	CD4 T Cells	p-value < 0.01	121
Blood	7days	CD8 T Cells	p-value < 0.01	175
Blood	7days	Ly6c+ Monocytes	p-value < 0.01	95
Blood	7days	Natural Killer Cells	p-value < 0.01	143
Blood	7days	B Cells	p-value < 0.01	175
Blood	7days	Granulocytes	p-value < 0.01	10
Blood	7days	Treml4+ Monocytes	p-value < 0.01	64
Blood	7days	Megakaryocytes	p-value < 0.01	22
Blood	7days	CD4 T Cells	p Adj < 0.05	17
Blood	7days	CD8 T Cells	p Adj < 0.05	19
Blood	7days	Ly6c+ Monocytes	p Adj < 0.05	5
Blood	7days	Natural Killer Cells	p Adj < 0.05	13
Blood	7days	B Cells	p Adj < 0.05	107
Blood	7days	Granulocytes	p Adj < 0.05	0
Blood	7days	Treml4+ Monocytes	p Adj < 0.05	1
Blood	7days	Megakaryocytes	p Adj < 0.05	0
