# Supplementary material for: Systems spatiotemporal dynamics of traumatic brain injury at single-cell resolution reveals humanin as a therapeutic target
Source: Cell Mol Life Sci. 2022 Aug 11;79(9):480. doi: 10.1007/s00018-022-04495-9 (PMC9372016; doi:10.1007/s00018-022-04495-9)
Supplement: Supplementary file 8 — (XLSX 996 KB) [file 18_2022_4495_MOESM8_ESM.xlsx]

## Sheet: Sheet1
Supplementary Table 7. Over-represented biological pathways among DEGs between Sham and TBI for individual cell clusters.
Tissue	Timepoint	CellType	Pval	Enrichment	FDR	PathwaySource	Pathway	nDEGs	nOverlap	Overlap
Blood	24hrs	B.Cells	6.86065e-16	53.8278	3.19226e-12	GObp	GO_PHAGOCYTOSIS_ENGULFMENT	86	9	IGLC1,IGLL5,IGLC2,IGLC3,IGLC7,IGLL1,ELMO1,IGHM,IGKC
Blood	24hrs	B.Cells	9.1608e-15	42.6136	4.26252e-11	GObp	GO_MEMBRANE_INVAGINATION	86	9	IGLC1,IGLL5,IGLC2,IGLC3,IGLC7,IGLL1,ELMO1,IGHM,IGKC
Blood	24hrs	B.Cells	1.94646e-14	53.4759	9.05687e-11	GObp	GO_PHAGOCYTOSIS_RECOGNITION	86	8	IGLC1,IGLL5,IGLC2,IGLC3,IGLC7,IGLL1,IGHM,IGKC
Blood	24hrs	B.Cells	3.28094e-14	37.8788	1.52662e-10	GObp	GO_B_CELL_RECEPTOR_SIGNALING_PATHWAY	86	9	CD79B,IGLC1,IGLL5,IGLC2,IGLC3,IGLC7,IGLL1,IGHM,IGKC
Blood	24hrs	B.Cells	4.94536e-14	11.2581	2.30108e-10	GObp	GO_IMMUNE_RESPONSE_REGULATING_CELL_SURFACE_RECEPTOR_SIGNALING_PATHWAY	86	16	CALM1,CD79B,IGLC1,IGLL5,IGLC2,IGLC3,IGLC7,IGLL1,ELMO1,HLA-DQB1,HLA-DQB2,NFATC3,IGHM,IGKC,UBB,ARPC2
Blood	24hrs	B.Cells	4.41972e-13	29.6443	2.0565e-09	GObp	GO_HUMORAL_IMMUNE_RESPONSE_MEDIATED_BY_CIRCULATING_IMMUNOGLOBULIN	86	9	IGLC1,IGLL5,IGLC2,IGLC3,IGLC7,IGLL1,HLA-DQB1,IGHM,IGKC
Blood	24hrs	B.Cells	3.04797e-12	13.986	1.41822e-08	GObp	GO_ANTIGEN_RECEPTOR_MEDIATED_SIGNALING_PATHWAY	86	12	CD79B,IGLC1,IGLL5,IGLC2,IGLC3,IGLC7,IGLL1,HLA-DQB1,HLA-DQB2,IGHM,IGKC,UBB
Blood	24hrs	B.Cells	1.82e-11	20.6612	8.46845e-08	GObp	GO_B_CELL_MEDIATED_IMMUNITY	86	9	IGLC1,IGLL5,IGLC2,IGLC3,IGLC7,IGLL1,HLA-DQB1,IGHM,IGKC
Blood	24hrs	B.Cells	3.46252e-11	13.369	1.61111e-07	GObp	GO_HUMORAL_IMMUNE_RESPONSE	86	11	IGLC1,IGLL5,IGLC2,IGLC3,IGLC7,IGLL1,B2M,HLA-DQB1,IGHM,MS4A1,IGKC
Blood	24hrs	B.Cells	4.17118e-11	13.1579	1.94085e-07	GObp	GO_PHAGOCYTOSIS	86	11	IGLC1,IGLL5,IGLC2,IGLC3,IGLC7,IGLL1,ELMO1,IGHM,IGKC,ARPC2,CORO1A
Blood	24hrs	B.Cells	4.55184e-11	23.9234	2.11797e-07	GObp	GO_COMPLEMENT_ACTIVATION	86	8	IGLC1,IGLL5,IGLC2,IGLC3,IGLC7,IGLL1,IGHM,IGKC
Blood	24hrs	B.Cells	4.5694e-11	15.4607	2.12614e-07	GObp	GO_LYMPHOCYTE_MEDIATED_IMMUNITY	86	10	IGLC1,IGLL5,IGLC2,IGLC3,IGLC7,IGLL1,HLA-DQB1,IGHM,IGKC,CORO1A
Blood	24hrs	B.Cells	4.9188e-11	15.3563	2.28872e-07	GObp	GO_CELL_RECOGNITION	86	10	IGLC1,IGLL5,IGLC2,IGLC3,IGLC7,IGLL1,IGHM,IGKC,CXCR4,CORO1A
Blood	24hrs	B.Cells	1.36677e-10	16.9046	6.35958e-07	GObp	GO_REGULATION_OF_B_CELL_ACTIVATION	86	9	IGLC1,IGLL5,IGLC2,IGLC3,IGLC7,IGLL1,BANK1,IGHM,IGKC
Blood	24hrs	B.Cells	1.41779e-10	21.1416	6.59699e-07	GObp	GO_POSITIVE_REGULATION_OF_B_CELL_ACTIVATION	86	8	IGLC1,IGLL5,IGLC2,IGLC3,IGLC7,IGLL1,IGHM,IGKC
Blood	24hrs	B.Cells	5.09525e-10	18.3655	2.37082e-06	GObp	GO_PROTEIN_ACTIVATION_CASCADE	86	8	IGLC1,IGLL5,IGLC2,IGLC3,IGLC7,IGLL1,IGHM,IGKC
Blood	24hrs	B.Cells	5.23307e-10	7.45156	2.43495e-06	GObp	GO_ACTIVATION_OF_IMMUNE_RESPONSE	86	14	CD79B,IGLC1,IGLL5,IGLC2,IGLC3,IGLC7,IGLL1,ELMO1,HLA-DQB1,HLA-DQB2,IGHM,IGKC,UBB,ARPC2
Blood	24hrs	B.Cells	6.81451e-10	12.025	3.17079e-06	GObp	GO_LEUKOCYTE_MEDIATED_IMMUNITY	86	10	IGLC1,IGLL5,IGLC2,IGLC3,IGLC7,IGLL1,HLA-DQB1,IGHM,IGKC,CORO1A
Blood	24hrs	B.Cells	1.47347e-09	13.2822	6.85605e-06	GObp	GO_ADAPTIVE_IMMUNE_RESPONSE_BASED_ON_SOMATIC_RECOMBINATION_OF_IMMUNE_RECEPTORS_BUILT_FROM_IMMUNOGLOBULIN_SUPERFAMILY_DOMAINS	86	9	IGLC1,IGLL5,IGLC2,IGLC3,IGLC7,IGLL1,HLA-DQB1,IGHM,IGKC
Blood	24hrs	B.Cells	2.31015e-09	6.68449	7.87531e-06	ChemicalGeneticPerturbations	SMID_BREAST_CANCER_NORMAL_LIKE_UP	86	14	CD79B,ELMO1,ARHGAP15,LTB,HLA-DQB1,CD52,BANK1,IGHM,MS4A1,ZEB1,IGKC,RNASE6,CORO1A,DOCK10
Blood	24hrs	B.Cells	1.69627e-09	11.0327	7.89276e-06	GObp	GO_FC_RECEPTOR_SIGNALING_PATHWAY	86	10	CALM1,IGLC1,IGLC2,IGLC3,IGLC7,ELMO1,NFATC3,IGKC,UBB,ARPC2
Blood	24hrs	B.Cells	2.79841e-09	6.05522	1.3021e-05	GObp	GO_POSITIVE_REGULATION_OF_IMMUNE_RESPONSE	86	15	CD79B,IGLC1,IGLL5,IGLC2,IGLC3,IGLC7,IGLL1,ELMO1,B2M,HLA-DQB1,HLA-DQB2,IGHM,IGKC,UBB,ARPC2
Blood	24hrs	B.Cells	2.89557e-09	6.574	1.34731e-05	GObp	GO_REGULATION_OF_CELL_ACTIVATION	86	14	IGLC1,IGLL5,IGLC2,IGLC3,IGLC7,IGLL1,ABR,HLA-DQB1,HLA-DQB2,BANK1,IGHM,ZEB1,IGKC,CORO1A
Blood	24hrs	B.Cells	4.6351e-09	4.76796	2.15671e-05	GObp	GO_REGULATION_OF_IMMUNE_RESPONSE	86	18	CALM1,CD79B,IGLC1,IGLL5,IGLC2,IGLC3,IGLC7,IGLL1,ELMO1,ABR,B2M,HLA-DQB1,HLA-DQB2,NFATC3,IGHM,IGKC,UBB,ARPC2
Blood	24hrs	B.Cells	9.03795e-09	16.7464	4.20536e-05	GObp	GO_FC_GAMMA_RECEPTOR_SIGNALING_PATHWAY	86	7	IGLC1,IGLC2,IGLC3,IGLC7,ELMO1,IGKC,ARPC2
Blood	24hrs	B.Cells	1.15662e-08	8.03859	5.38175e-05	GObp	GO_POSITIVE_REGULATION_OF_CELL_ACTIVATION	86	11	IGLC1,IGLL5,IGLC2,IGLC3,IGLC7,IGLL1,HLA-DQB1,HLA-DQB2,IGHM,IGKC,CORO1A
Blood	24hrs	B.Cells	1.26104e-08	12.8041	5.86762e-05	GObp	GO_FC_EPSILON_RECEPTOR_SIGNALING_PATHWAY	86	8	CALM1,IGLC1,IGLC2,IGLC3,IGLC7,NFATC3,IGKC,UBB
Blood	24hrs	B.Cells	2.64951e-08	6.06683	9.03219e-05	ChemicalGeneticPerturbations	RODWELL_AGING_KIDNEY_UP	86	13	PFN1,LY6E,SHISA5,LTB,HLA-DQB1,HLA-DMA,IGHM,IGKC,RNASE6,CXCR4,ZCCHC7,CORO1A,ST8SIA4
Blood	24hrs	B.Cells	2.49567e-08	3.56379	0.000116123	GObp	GO_REGULATION_OF_IMMUNE_SYSTEM_PROCESS	86	22	CALM1,CD79B,IGLC1,IGLL5,IGLC2,IGLC3,IGLC7,IGLL1,ELMO1,ABR,B2M,HLA-DQB1,HLA-DQB2,NFATC3,BANK1,IGHM,ZEB1,IGKC,UBB,ARPC2,CORO1A,TSC22D3
Blood	24hrs	B.Cells	4.38325e-08	13.7147	0.000149425	ChemicalGeneticPerturbations	MATTIOLI_MGUS_VS_PCL	86	7	JUND,PFN1,B2M,EEF1A1,IGHM,IGKC,CORO1A
Blood	24hrs	B.Cells	4.59017e-08	5.80461	0.000213581	GObp	GO_ENDOCYTOSIS	86	13	IGLC1,IGLL5,IGLC2,IGLC3,IGLC7,HBA2,IGLL1,HBA1,ELMO1,IGHM,IGKC,ARPC2,CORO1A
Blood	24hrs	B.Cells	5.46671e-08	7.89141	0.000254366	GObp	GO_ADAPTIVE_IMMUNE_RESPONSE	86	10	CD79B,IGLC1,IGLL5,IGLC2,IGLC3,IGLC7,IGLL1,HLA-DQB1,IGHM,IGKC
Blood	24hrs	B.Cells	7.99699e-08	7.60109	0.000272617	ChemicalGeneticPerturbations	WALLACE_PROSTATE_CANCER_RACE_UP	86	10	ARHGAP15,HLA-DQB1,CD52,IGHM,MS4A1,IGKC,RNASE6,CXCR4,CORO1A,DOCK10
Blood	24hrs	B.Cells	9.08229e-08	8.63061	0.000309615	ChemicalGeneticPerturbations	HOSHIDA_LIVER_CANCER_SUBCLASS_S1	86	9	PFN1,IGLL1,HLA-DQB1,HLA-DMA,IGKC,RNASE6,CXCR4,ARPC2,CORO1A
Blood	24hrs	B.Cells	9.08229e-08	8.63061	0.000422599	GObp	GO_DEFENSE_RESPONSE_TO_BACTERIUM	86	9	IGLC1,IGLL5,IGLC2,IGLC3,IGLC7,IGLL1,B2M,IGHM,IGKC
Blood	24hrs	B.Cells	1.45983e-07	6.37755	0.000497655	ChemicalGeneticPerturbations	LINDGREN_BLADDER_CANCER_CLUSTER_2B	86	11	CALM1,IGLC1,IGLL1,ARHGAP15,HLA-DQB1,HLA-DMA,CD52,RNASE6,CXCR4,ARPC2,TSC22D3
Blood	24hrs	B.Cells	1.48861e-07	20.6612	0.000507468	ChemicalGeneticPerturbations	YU_MYC_TARGETS_DN	86	5	LTB,HLA-DQB1,HLA-DMA,MS4A1,MACF1
Blood	24hrs	B.Cells	1.73138e-07	8.05297	0.000590228	ChemicalGeneticPerturbations	MCLACHLAN_DENTAL_CARIES_UP	86	9	LTB,HLA-DQB1,HLA-DMA,IGHM,MS4A1,IGKC,RNASE6,CXCR4,CORO1A
Blood	24hrs	B.Cells	2.05659e-07	19.5925	0.000701092	ChemicalGeneticPerturbations	MORI_LARGE_PRE_BII_LYMPHOCYTE_DN	86	5	CD79B,LTB,HLA-DMA,MS4A1,MACF1
Blood	24hrs	B.Cells	2.05659e-07	19.5925	0.000701092	ChemicalGeneticPerturbations	KLEIN_PRIMARY_EFFUSION_LYMPHOMA_DN	86	5	CD79B,HLA-DQB1,HLA-DMA,CD52,MS4A1
Blood	24hrs	B.Cells	1.9535e-07	4.19419	0.000908962	GObp	GO_POSITIVE_REGULATION_OF_IMMUNE_SYSTEM_PROCESS	86	16	CD79B,IGLC1,IGLL5,IGLC2,IGLC3,IGLC7,IGLL1,ELMO1,B2M,HLA-DQB1,HLA-DQB2,IGHM,IGKC,UBB,ARPC2,CORO1A
Blood	24hrs	B.Cells	2.6957e-07	28.4091	0.000918963	ChemicalGeneticPerturbations	BAUS_TFF2_TARGETS_UP	86	4	LTB,IGHM,MS4A1,ZEB1
Blood	24hrs	B.Cells	2.00453e-07	5.61167	0.000932707	GObp	GO_IMMUNE_EFFECTOR_PROCESS	86	12	IGLC1,IGLL5,IGLC2,IGLC3,IGLC7,IGLL1,ELMO1,HLA-DQB1,IGHM,IGKC,ARPC2,CORO1A
Blood	24hrs	B.Cells	2.3837e-07	3.71901	0.00110914	GObp	GO_IMMUNE_RESPONSE	86	18	CD79B,IGLC1,IGLL5,IGLC2,IGLC3,IGLC7,IGLL1,B2M,LTB,HLA-DQB1,HLA-DQB2,HLA-DMA,IGHM,MS4A1,ZEB1,IGKC,UBB,CORO1A
Blood	24hrs	B.Cells	2.66051e-07	6.744	0.00123793	GObp	GO_REGULATION_OF_CELLULAR_COMPONENT_SIZE	86	10	PFN1,ARPC5L,TMSB4Y,SH3BGRL3,GOLGA4,SEMA5B,MACF1,ARPC2,CORO1A,SSH2
Blood	24hrs	B.Cells	4.33687e-07	10.1981	0.00201794	GObp	GO_REGULATION_OF_ACTIN_FILAMENT_LENGTH	86	7	PFN1,ARPC5L,TMSB4Y,SH3BGRL3,ARPC2,CORO1A,SSH2
Blood	24hrs	B.Cells	6.38695e-07	16.2338	0.00217731	ChemicalGeneticPerturbations	HOFFMANN_SMALL_PRE_BII_TO_IMMATURE_B_LYMPHOCYTE_UP	86	5	LTB,LY6D,HLA-DQB1,HLA-DMA,MS4A1
Blood	24hrs	B.Cells	6.43894e-07	6.98107	0.00219503	ChemicalGeneticPerturbations	HADDAD_B_LYMPHOCYTE_PROGENITOR	86	9	CALM1,CD79B,SNN,IGLL1,CDK13,BANK1,MS4A1,VPS13A,CXCR4
Blood	24hrs	B.Cells	4.98207e-07	4.77309	0.00231816	GObp	GO_INNATE_IMMUNE_RESPONSE	86	13	IGLC1,IGLL5,IGLC2,IGLC3,IGLC7,IGLL1,B2M,HLA-DQB1,HLA-DQB2,IGHM,IGKC,UBB,CORO1A
Blood	24hrs	B.Cells	9.72424e-07	22.1729	0.00331499	ChemicalGeneticPerturbations	CROONQUIST_NRAS_SIGNALING_UP	86	4	SNN,IGHM,RNASE6,ST8SIA4
Blood	24hrs	B.Cells	1.0958e-06	5.84249	0.00373558	ChemicalGeneticPerturbations	HSIAO_HOUSEKEEPING_GENES	86	10	JUND,PFN1,EIF3F,B2M,EEF1A1,HLA-DQB1,UBB,YBX1,ARPC2,H3F3B
Blood	24hrs	B.Cells	1.12984e-06	8.98819	0.00385162	ChemicalGeneticPerturbations	HAHTOLA_MYCOSIS_FUNGOIDES_SKIN_UP	86	7	CALM1,JUND,PFN1,FBXO11,CD52,TNPO1,TSC22D3
Blood	24hrs	B.Cells	8.62111e-07	2.74927	0.0040114	GObp	GO_IMMUNE_SYSTEM_PROCESS	86	24	CD79B,IGLC1,IGLL5,IGLC2,IGLC3,IGLC7,IGLL1,ELMO1,B2M,CDK13,LTB,LY6D,HLA-DQB1,HLA-DQB2,HLA-DMA,BANK1,IGHM,MS4A1,ZEB1,IGKC,UBB,CXCR4,ARPC2,CORO1A
Blood	24hrs	B.Cells	1.50588e-06	4.06362	0.00513355	ChemicalGeneticPerturbations	ONKEN_UVEAL_MELANOMA_UP	86	14	CALM1,PFN1,ABR,B2M,LY6E,HLA-DMA,SH3BGRL3,RALGAPA1,TNPO1,MACF1,CXCR4,INPP4B,ARPC2,PGAP1
Blood	24hrs	B.Cells	4.70542e-05	6.31313	0.00875208	Kegg	KEGG_REGULATION_OF_ACTIN_CYTOSKELETON	86	6	PFN1,ARPC5L,TMSB4Y,MYL12B,ARPC2,SSH2
Blood	24hrs	B.Cells	0.000254487	5.68182	0.0127244	Hallmark	HALLMARK_INTERFERON_GAMMA_RESPONSE	86	5	B2M,LY6E,HLA-DMA,BANK1,ST8SIA4
Blood	24hrs	B.Cells	3.35618e-06	4.73485	0.0156163	GObp	GO_RESPONSE_TO_BACTERIUM	86	11	IGLC1,IGLL5,IGLC2,IGLC3,IGLC7,JUND,IGLL1,ABR,B2M,IGHM,IGKC
Blood	24hrs	B.Cells	4.96569e-06	6.31313	0.016928	ChemicalGeneticPerturbations	POOLA_INVASIVE_BREAST_CANCER_UP	86	8	CD79B,ARHGAP15,LTB,CD52,BANK1,IGHM,MS4A1,CXCR4
Blood	24hrs	B.Cells	6.56867e-06	4.43262	0.0223926	ChemicalGeneticPerturbations	SMID_BREAST_CANCER_LUMINAL_B_DN	86	11	CD79B,LTB,LY6D,HLA-DQB1,CD52,BANK1,IGHM,MS4A1,IGKC,YBX1,CORO1A
Blood	24hrs	B.Cells	8.29605e-06	8.26446	0.0282812	ChemicalGeneticPerturbations	PASQUALUCCI_LYMPHOMA_BY_GC_STAGE_DN	86	6	SNN,ARHGAP15,AFF3,BANK1,CORO1A,ANKRD44
Blood	24hrs	B.Cells	6.11607e-06	3.11835	0.0284581	GObp	GO_VESICLE_MEDIATED_TRANSPORT	86	17	CALM1,IGLC1,IGLL5,IGLC2,IGLC3,IGLC7,HBA2,IGLL1,HBA1,ELMO1,GOLGA4,IGHM,VPS13A,IGKC,MACF1,ARPC2,CORO1A
Blood	24hrs	B.Cells	7.01691e-06	4.8151	0.0326497	GObp	GO_REGULATION_OF_ANATOMICAL_STRUCTURE_SIZE	86	10	PFN1,ARPC5L,TMSB4Y,SH3BGRL3,GOLGA4,SEMA5B,MACF1,ARPC2,CORO1A,SSH2
Blood	24hrs	B.Cells	1.0168e-05	4.62877	0.0346627	ChemicalGeneticPerturbations	ZHENG_BOUND_BY_FOXP3	86	10	ELMO1,ARHGAP15,SGMS1,MACF1,INPP4B,PGAP1,ST8SIA4,SSH2,DOCK10,ANKRD44
Blood	24hrs	B.Cells	8.14855e-06	6.88705	0.0379152	GObp	GO_RECEPTOR_MEDIATED_ENDOCYTOSIS	86	7	IGLC1,IGLC2,IGLC3,IGLC7,HBA2,HBA1,IGKC
Blood	24hrs	B.Cells	1.30493e-05	2.83697	0.0444852	ChemicalGeneticPerturbations	PUJANA_ATM_PCC_NETWORK	86	18	CD79B,IGLL1,EIF3F,TMSB4Y,B2M,CDK13,EEF1A1,NFATC3,CD52,MS4A1,IGKC,YBX1,TECPR2,CXCR4,ARPC2,CORO1A,CNBP,DOCK10
Blood	24hrs	CD4T	2.10016e-13	7.47398	7.15946e-10	ChemicalGeneticPerturbations	ZHENG_BOUND_BY_FOXP3	104	20	CD226,RFX3,ARID5B,UTRN,SGMS1,SCML4,NUDCD3,MLLT3,PELI1,NRIP1,ARHGAP15,TOX,MGAT5,INPP4B,MACF1,CBLB,DAPL1,ADSS,SSH2,HECTD1
Blood	24hrs	CD4T	7.6493e-10	10.2977	2.60765e-06	ChemicalGeneticPerturbations	ZHENG_FOXP3_TARGETS_IN_THYMUS_UP	104	11	RFX3,ARID5B,SGMS1,NUDCD3,WNK1,PELI1,ARHGAP15,TOX,STRN3,INPP4B,CBLB
Blood	24hrs	CD4T	9.64111e-10	10.0917	3.28665e-06	ChemicalGeneticPerturbations	LEE_DIFFERENTIATING_T_LYMPHOCYTE	104	11	LTB,CDK13,ARHGAP15,CD52,ITK,CORO1A,TRBC1,RAC2,SFPQ,CD3D,CD3G
Blood	24hrs	CD4T	4.62121e-08	24.7954	0.000157537	ChemicalGeneticPerturbations	ZHENG_FOXP3_TARGETS_IN_T_LYMPHOCYTE_DN	104	5	UTRN,SCML4,WNK1,PELI1,NRIP1
Blood	24hrs	CD4T	3.75195e-07	4.93855	0.00127904	ChemicalGeneticPerturbations	DACOSTA_UV_RESPONSE_VIA_ERCC3_COMMON_DN	104	13	KIAA1109,ARID5B,CDK13,ASCC3,NRIP1,STAG1,MGAT5,STRN3,WRN,CBLB,ABI1,PRRC2C,FRYL
Blood	24hrs	CD4T	7.88771e-07	4.6407	0.00268892	ChemicalGeneticPerturbations	SCHAEFFER_PROSTATE_DEVELOPMENT_6HR_DN	104	13	PFN1,ARID5B,MLLT3,WNK1,NRIP1,STRN3,AFF3,NDUFA4,MACF1,SFPQ,PRRC2C,FRYL,GCC2
Blood	24hrs	CD4T	2.42538e-05	5.94631	0.0045112	Kegg	KEGG_REGULATION_OF_ACTIN_CYTOSKELETON	104	7	PFN1,IQGAP2,APC,TMSB4Y,MYL12B,RAC2,SSH2
Blood	24hrs	CD4T	0.000113407	5.50459	0.00567036	Hallmark	HALLMARK_ALLOGRAFT_REJECTION	104	6	LTB,B2M,ITK,ABI1,CD3D,CD3G
Blood	24hrs	CD4T	1.35715e-06	8.79729	0.00631481	GObp	GO_T_CELL_RECEPTOR_SIGNALING_PATHWAY	104	7	UBA52,ITK,PDE4D,TRBC1,UBB,CD3D,CD3G
Blood	24hrs	CD4T	2.23264e-06	8.23336	0.0103885	GObp	GO_REGULATION_OF_ACTIN_FILAMENT_LENGTH	104	7	PFN1,IQGAP2,TMSB4Y,CORO1A,NPHS1,RICTOR,SSH2
Blood	24hrs	CD4T	0.000229195	7.26678	0.0114597	Hallmark	HALLMARK_ANDROGEN_RESPONSE	104	4	ARID5B,IQGAP2,B2M,INPP4B
Blood	24hrs	CD4T	3.36535e-06	9.49067	0.0114725	ChemicalGeneticPerturbations	MATTIOLI_MGUS_VS_PCL	104	6	JUND,PFN1,EEF1A1,B2M,PELI1,CORO1A
Blood	24hrs	CD4T	3.67914e-06	3.43366	0.0125422	ChemicalGeneticPerturbations	DACOSTA_UV_RESPONSE_VIA_ERCC3_DN	104	16	KIAA1109,ARID5B,SGMS1,CDK13,APC,ASCC3,NRIP1,STAG1,STRN3,COG5,WRN,MACF1,CBLB,ABI1,PRRC2C,FRYL
Blood	24hrs	CD4T	5.60411e-06	15.6159	0.0260759	GObp	GO_INTRA_GOLGI_VESICLE_MEDIATED_TRANSPORT	104	4	TRIP11,VTI1A,COG5,GCC2
Blood	24hrs	CD4T	4.00312e-05	10.4849	0.026981	Reactome	REACTOME_IMMUNOREGULATORY_INTERACTIONS_BETWEEN_A_LYMPHOID_AND_A_NON_LYMPHOID_CELL	104	4	CD226,B2M,CD3D,CD3G
Blood	24hrs	CD4T	8.05058e-06	10.5452	0.0274444	ChemicalGeneticPerturbations	FLECHNER_BIOPSY_KIDNEY_TRANSPLANT_REJECTED_VS_OK_UP	104	5	CD52,CORO1A,TRBC1,RAC2,CD3D
Blood	24hrs	CD4T	1.09017e-05	5.11262	0.0371638	ChemicalGeneticPerturbations	GRESHOCK_CANCER_COPY_NUMBER_UP	104	9	MLLT3,APC,TRIP11,WRN,AFF3,ITK,ABI1,SFPQ,RAP1GDS1
Blood	24hrs	CD4T	0.000799853	4.58716	0.0399926	Hallmark	HALLMARK_MITOTIC_SPINDLE	104	5	APC,ABI1,RICTOR,KIF1B,SSH2
Blood	24hrs	CD4T	0.000236948	5.77001	0.0440723	Kegg	KEGG_PURINE_METABOLISM	104	5	FHIT,PDE3B,RRM2B,PDE4D,ADSS
Blood	24hrs	CD8T	5.26831e-17	6.43156	1.79597e-13	ChemicalGeneticPerturbations	ZHENG_BOUND_BY_FOXP3	185	30	RAPGEF6,CAMK4,CD226,PRKCH,UTRN,IFT80,RFX3,ITM2B,ELMO1,THADA,NUDCD3,THEMIS,ZBTB20,ARHGAP15,TNRC6B,GBP6,PRKCQ,ITPR2,PAG1,MACF1,MGAT5,MAN1A1,TOX,LLPH,INPP4B,UBAC2,DAPL1,HIVEP2,SSH2,ANKRD44
Blood	24hrs	CD8T	2.03933e-16	4.67836	6.95207e-13	ChemicalGeneticPerturbations	DACOSTA_UV_RESPONSE_VIA_ERCC3_DN	185	38	ITCH,CDK8,ATXN1,KDM5A,USP6,BAZ1A,ZZEF1,ATAD2B,ZBTB20,PRKCA,ROCK2,HERC4,CDK13,ARID4A,ARFGEF1,PTK2,MACF1,STRN3,MARK3,CHD9,REV3L,COG5,PKN2,SLK,AKAP10,ROCK1,ANKRD17,WRN,DMD,SSBP2,VPS13A,RASA1,FAM172A,EIF3A,HIVEP2,RANBP2,PPP1R12A,USP24
Blood	24hrs	CD8T	8.71338e-13	5.4484	2.97039e-09	ChemicalGeneticPerturbations	DACOSTA_UV_RESPONSE_VIA_ERCC3_COMMON_DN	185	25	CDK8,KDM5A,USP6,BAZ1A,ATAD2B,PRKCA,ROCK2,CDK13,ARFGEF1,PTK2,MGAT5,STRN3,MARK3,CHD9,REV3L,PKN2,SLK,AKAP10,ANKRD17,WRN,VPS13A,RASA1,HIVEP2,PPP1R12A,USP24
Blood	24hrs	CD8T	3.51466e-09	2.77601	1.63537e-05	GObp	GO_REGULATION_OF_IMMUNE_SYSTEM_PROCESS	185	37	CALM1,MAPK10,ITCH,CAMK4,CD226,PRKCH,THOC1,LCK,ELMO1,CD27,THEMIS,UBA52,B2M,PRKCA,ABR,SNTG1,PRKCQ,PAG1,PTK2,TRBC1,KCNQ1,CD8A,PPP3CA,RICTOR,CORO1A,PSMC1,TNIK,ARPC2,RAC2,CD8B,BANK1,ITPKB,ANKRD17,MBD5,UBB,PSMD13,CD3D
Blood	24hrs	CD8T	5.87443e-09	6.98174	2.00259e-05	ChemicalGeneticPerturbations	ZHENG_FOXP3_TARGETS_IN_THYMUS_UP	185	13	RAPGEF6,RFX3,WNK1,NUDCD3,ZBTB20,ARHGAP15,STRN3,MAN1A1,TOX,CHD9,INPP4B,UBAC2,HIVEP2
Blood	24hrs	CD8T	7.61507e-09	6.84211	2.59598e-05	ChemicalGeneticPerturbations	LEE_DIFFERENTIATING_T_LYMPHOCYTE	185	13	PRKCH,LCK,KDM5A,ARHGAP15,CDK13,PRKCQ,PAG1,TRBC1,CD52,CORO1A,RAC2,RNASET2,CD3D
Blood	24hrs	CD8T	7.39142e-09	3.84905	3.43923e-05	GObp	GO_REGULATION_OF_CELL_ADHESION	185	23	ITCH,CAMK4,UTRN,BCAS3,LCK,PRKCA,ROCK2,PRKCQ,PAG1,PTK2,TRBC1,MACF1,RICTOR,SLK,CORO1A,ARPC2,ROCK1,RAC2,ITPKB,RASA1,CD3D,FAF1,PPP1R12A
Blood	24hrs	CD8T	1.34588e-08	5.21427	6.26237e-05	GObp	GO_IMMUNE_RESPONSE_REGULATING_CELL_SURFACE_RECEPTOR_SIGNALING_PATHWAY	185	16	CALM1,MAPK10,LCK,ELMO1,THEMIS,UBA52,PRKCQ,PAG1,PTK2,TRBC1,PPP3CA,PSMC1,ARPC2,UBB,PSMD13,CD3D
Blood	24hrs	CD8T	3.83305e-07	12.8894	8.31772e-05	Biocarta	BIOCARTA_TCR_PATHWAY	185	6	CALM1,LCK,PRKCA,PPP3CA,RASA1,CD3D
Blood	24hrs	CD8T	2.84505e-08	3.36089	9.69877e-05	ChemicalGeneticPerturbations	ONKEN_UVEAL_MELANOMA_UP	185	25	CALM1,PFN1,ZC3H7A,CSPP1,BAZ1A,LY6E,B2M,PRKCA,ABR,ITPR2,ARFGEF1,PTK2,TRBC1,MACF1,MARK3,LUC7L2,REV3L,SH3BGRL3,INPP4B,RALGAPA1,ARPC2,TNPO1,PDE10A,HNRNPA1,PPP1R12A
Blood	24hrs	CD8T	3.25727e-08	7.4224	0.000151561	GObp	GO_REGULATION_OF_ACTIN_FILAMENT_LENGTH	185	11	PFN1,ARFIP1,TMSB4Y,ARFGEF1,NPHS1,RICTOR,SH3BGRL3,CORO1A,ARPC2,RASA1,SSH2
Blood	24hrs	CD8T	8.76679e-07	15.0376	0.000163062	Kegg	KEGG_PRIMARY_IMMUNODEFICIENCY	185	5	LCK,CD8A,IL2RG,CD8B,CD3D
Blood	24hrs	CD8T	4.46562e-08	23.9234	0.000207785	GObp	GO_REGULATION_OF_ESTABLISHMENT_OR_MAINTENANCE_OF_CELL_POLARITY	185	5	BCAS3,ROCK2,ARFGEF1,RICTOR,ROCK1
Blood	24hrs	CD8T	4.532e-08	3.18979	0.000210874	GObp	GO_REGULATION_OF_IMMUNE_RESPONSE	185	26	CALM1,MAPK10,ITCH,CD226,PRKCH,THOC1,LCK,ELMO1,THEMIS,UBA52,B2M,ABR,PRKCQ,PAG1,PTK2,TRBC1,CD8A,PPP3CA,PSMC1,ARPC2,RAC2,CD8B,ANKRD17,UBB,PSMD13,CD3D
Blood	24hrs	CD8T	5.24633e-08	5.06073	0.000244112	GObp	GO_REGULATION_OF_ACTIN_FILAMENT_BASED_PROCESS	185	15	PFN1,BCAS3,ARFIP1,TMSB4Y,ROCK2,PRKCQ,ARFGEF1,NPHS1,RICTOR,SH3BGRL3,CORO1A,ARPC2,ROCK1,RASA1,SSH2
Blood	24hrs	CD8T	1.54172e-06	7.32265	0.00028676	Kegg	KEGG_VASCULAR_SMOOTH_MUSCLE_CONTRACTION	185	8	CALM1,PRKCH,PRKCA,ROCK2,PRKCQ,ITPR2,ROCK1,PPP1R12A
Blood	24hrs	CD8T	6.50364e-08	5.77393	0.000302615	GObp	GO_REGULATION_OF_RESPONSE_TO_BIOTIC_STIMULUS	185	13	ITCH,CD226,LCK,ELMO1,UBA52,B2M,PRKCA,SNTG1,KCNQ1,TNIK,CD8B,ANKRD17,MBD5
Blood	24hrs	CD8T	7.32762e-08	2.47757	0.000340954	GObp	GO_INTRACELLULAR_SIGNAL_TRANSDUCTION	185	37	CALM1,RAPGEF6,MAPK10,ITCH,CAMK4,PRKCH,LCK,ELMO1,CD27,WNK1,ARL6IP5,TNRC6B,UBA52,PRKCA,SHISA5,ABR,ROCK2,PRKCQ,ITPR2,PAG1,PTK2,MARK3,NPHS1,PPP3CA,RICTOR,PKN2,IL2RG,PSMC1,TNIK,ROCK1,RAC2,ITPKB,RAB10,DMD,RASA1,UBB,PSMD13
Blood	24hrs	CD8T	7.27113e-06	7.01754	0.000363557	Hallmark	HALLMARK_PI3K_AKT_MTOR_SIGNALING	185	7	MAPK10,CAMK4,PFN1,LCK,CAB39L,ITPR2,IL2RG
Blood	24hrs	CD8T	8.56944e-08	3.0107	0.000398736	GObp	GO_PROTEIN_PHOSPHORYLATION	185	27	CALM1,MAPK10,CAMK4,CDK8,PRKCH,LCK,WNK1,UBA52,PRKCA,ROCK2,CDK13,PRKCQ,PTK2,MARK3,NPHS1,RICTOR,PKN2,SLK,IL2RG,PSMC1,TNIK,ROCK1,MYO3A,ITPKB,RASA1,UBB,PSMD13
Blood	24hrs	CD8T	1.41276e-07	9.67937	0.000481609	ChemicalGeneticPerturbations	FLECHNER_BIOPSY_KIDNEY_TRANSPLANT_REJECTED_VS_OK_UP	185	8	LCK,CD27,TRBC1,CD8A,CD52,CORO1A,RAC2,CD3D
Blood	24hrs	CD8T	9.81526e-07	7.72574	0.000661549	Reactome	REACTOME_SIGNALING_BY_EGFR_IN_CANCER	185	8	CALM1,CAMK4,UBA52,PRKCA,ITPR2,PAG1,RICTOR,CBL
Blood	24hrs	CD8T	1.52877e-07	7.20981	0.000711335	GObp	GO_T_CELL_RECEPTOR_SIGNALING_PATHWAY	185	10	LCK,THEMIS,UBA52,PRKCQ,PAG1,TRBC1,PSMC1,UBB,PSMD13,CD3D
Blood	24hrs	CD8T	4.52157e-06	9.02256	0.000841012	Kegg	KEGG_LONG_TERM_POTENTIATION	185	6	CALM1,CAMK4,PRKCA,ITPR2,PPP3CA,PPP1R12A
Blood	24hrs	CD8T	1.89826e-07	9.35673	0.000883261	GObp	GO_REGULATION_OF_CELL_MATRIX_ADHESION	185	8	UTRN,BCAS3,ROCK2,PTK2,MACF1,SLK,ROCK1,RASA1
Blood	24hrs	CD8T	2.64419e-07	5.58919	0.000901406	ChemicalGeneticPerturbations	JAATINEN_HEMATOPOIETIC_STEM_CELL_DN	185	12	CAMK4,ZFP36L1,LCK,CD27,GPCPD1,THEMIS,NKG7,PRKCA,TRBC1,CD8A,CD8B,CD3D
Blood	24hrs	CD8T	3.41627e-07	3.04375	0.00116461	ChemicalGeneticPerturbations	CUI_TCF21_TARGETS_2_DN	185	24	CALM1,PRKCH,PRKCA,ARID4A,PAG1,MACF1,MGAT5,LUC7L2,MAN1A1,RICTOR,SLK,IL2RG,CORO1A,ROCK1,ITPKB,MBD5,SSBP2,VPS13A,LYST,PDE10A,HIVEP2,CBL,AHNAK,ASH1L
Blood	24hrs	CD8T	2.5999e-07	10.8359	0.00120973	GObp	GO_REGULATION_OF_CELL_JUNCTION_ASSEMBLY	185	7	PRKCH,BCAS3,ROCK2,PTK2,MACF1,SLK,ROCK1
Blood	24hrs	CD8T	2.8386e-07	6.09418	0.0013208	GObp	GO_REGULATION_OF_DEFENSE_RESPONSE_TO_VIRUS	185	11	ITCH,LCK,ELMO1,UBA52,B2M,SNTG1,KCNQ1,TNIK,CD8B,ANKRD17,MBD5
Blood	24hrs	CD8T	7.25965e-06	4.87329	0.0013503	Kegg	KEGG_REGULATION_OF_ACTIN_CYTOSKELETON	185	10	PFN1,TMSB4Y,ROCK2,PTK2,ARPC2,MYL12B,ROCK1,RAC2,SSH2,PPP1R12A
Blood	24hrs	CD8T	8.96057e-06	6.82261	0.00166667	Kegg	KEGG_T_CELL_RECEPTOR_SIGNALING_PATHWAY	185	7	LCK,PRKCQ,CD8A,PPP3CA,CD8B,CD3D,CBL
Blood	24hrs	CD8T	4.42147e-07	12.6316	0.00205731	GObp	GO_REGULATION_OF_ADHERENS_JUNCTION_ORGANIZATION	185	6	BCAS3,ROCK2,PTK2,MACF1,SLK,ROCK1
Blood	24hrs	CD8T	7.30714e-07	4.73502	0.002491	ChemicalGeneticPerturbations	GABRIELY_MIR21_TARGETS	185	13	UTRN,WNK1,ATAD2B,ZBTB20,TNRC6B,ARID4A,ARFGEF1,PAG1,REV3L,RFX7,DMD,TNPO1,VPS13A
Blood	24hrs	CD8T	6.75148e-07	5.62085	0.00314146	GObp	GO_FC_RECEPTOR_SIGNALING_PATHWAY	185	11	CALM1,MAPK10,ELMO1,UBA52,PRKCQ,PTK2,PPP3CA,PSMC1,ARPC2,UBB,PSMD13
Blood	24hrs	CD8T	4.84341e-06	6.37959	0.00326446	Reactome	REACTOME_HOST_INTERACTIONS_OF_HIV_FACTORS	185	8	LCK,ELMO1,UBA52,B2M,PSMC1,CD8B,PSMD13,RANBP2
Blood	24hrs	CD8T	5.00056e-06	15.5945	0.00337038	Reactome	REACTOME_SEMA4D_INDUCED_CELL_MIGRATION_AND_GROWTH_CONE_COLLAPSE	185	4	ROCK2,MYL12B,ROCK1,RAC2
Blood	24hrs	CD8T	7.62579e-07	2.91386	0.00354828	GObp	GO_POSITIVE_REGULATION_OF_IMMUNE_SYSTEM_PROCESS	185	24	ITCH,CD226,PRKCH,LCK,ELMO1,CD27,THEMIS,UBA52,B2M,PRKCA,PRKCQ,PAG1,PTK2,TRBC1,RICTOR,CORO1A,PSMC1,ARPC2,RAC2,ITPKB,ANKRD17,UBB,PSMD13,CD3D
Blood	24hrs	CD8T	2.01433e-05	8.92061	0.00374665	Kegg	KEGG_PATHOGENIC_ESCHERICHIA_COLI_INFECTION	185	5	PRKCA,ROCK2,ARPC2,ROCK1,TUBA1B
Blood	24hrs	CD8T	8.41954e-07	6.08458	0.00391761	GObp	GO_REGULATION_OF_CELL_SUBSTRATE_ADHESION	185	10	UTRN,BCAS3,ROCK2,PTK2,MACF1,SLK,ARPC2,ROCK1,RAC2,RASA1
Blood	24hrs	CD8T	6.04089e-06	15.0376	0.00407156	Reactome	REACTOME_THE_ROLE_OF_NEF_IN_HIV1_REPLICATION_AND_DISEASE_PATHOGENESIS	185	4	LCK,ELMO1,B2M,CD8B
Blood	24hrs	CD8T	9.07647e-07	3.69726	0.00422328	GObp	GO_REGULATION_OF_CELL_ACTIVATION	185	17	ITCH,CAMK4,CD226,THOC1,LCK,CD27,PRKCA,ABR,PRKCQ,PAG1,TRBC1,RICTOR,CORO1A,RAC2,BANK1,ITPKB,CD3D
Blood	24hrs	CD8T	1.13291e-06	3.01928	0.00527141	GObp	GO_REGULATION_OF_CELLULAR_COMPONENT_BIOGENESIS	185	22	PFN1,PRKCH,BCAS3,ARFIP1,TMSB4Y,PRKCA,ROCK2,PRKCQ,ARFGEF1,PTK2,MACF1,NPHS1,RICTOR,SLK,CORO1A,PSMC1,ARPC2,ROCK1,RAC2,RASA1,FAF1,SSH2
Blood	24hrs	CD8T	1.65784e-06	7.25953	0.00565158	ChemicalGeneticPerturbations	IKEDA_MIR30_TARGETS_UP	185	8	CALM1,ELMO1,ARID4A,CHD9,DMD,SSBP2,RASA1,PPP1R12A
Blood	24hrs	CD8T	3.27529e-05	5.71195	0.00609203	Kegg	KEGG_AXON_GUIDANCE	185	7	ROCK2,PTK2,PPP3CA,ROCK1,RAC2,SEMA5B,RASA1
Blood	24hrs	CD8T	0.000129182	4.21053	0.00645909	Hallmark	HALLMARK_APICAL_JUNCTION	185	8	CDK8,PFN1,PTK2,EXOC4,ARPC2,MYL12B,RAC2,RASA1
Blood	24hrs	CD8T	1.92875e-06	2.69906	0.00657511	ChemicalGeneticPerturbations	GRYDER_PAX3FOXO1_ENHANCERS_IN_TADS	185	25	CHD6,ZFP36L1,ATXN1,ELMO1,WNK1,ZZEF1,ATAD2B,ARHGAP15,RRM2B,ZFAND3,DHX32,PKN2,GLO1,RIMKLB,COX4I1,INPP4B,ARPC2,UBAC2,ITPKB,ANKRD17,TNPO1,EIF3A,FAF1,SSH2,GALNT2
Blood	24hrs	CD8T	1.52693e-06	3.56469	0.00710478	GObp	GO_REGULATION_OF_CYTOSKELETON_ORGANIZATION	185	17	PFN1,BCAS3,ARFIP1,TMSB4Y,ROCK2,PRKCQ,ARFGEF1,PTK2,NPHS1,RICTOR,SH3BGRL3,CORO1A,ARPC2,ROCK1,RASA1,WDR62,SSH2
Blood	24hrs	CD8T	2.25926e-06	4.30321	0.00770182	ChemicalGeneticPerturbations	DAZARD_RESPONSE_TO_UV_NHEK_DN	185	13	KDM5A,USP6,BAZ1A,ELF2,PTK2,CHD9,REV3L,AKAP10,SSBP2,VPS13A,HIVEP2,PPP1R12A,USP24
Blood	24hrs	CD8T	1.17188e-05	6.57895	0.00789847	Reactome	REACTOME_SIGNALING_BY_FGFR	185	7	CALM1,CAMK4,UBA52,PRKCA,ITPR2,RICTOR,CBL
Blood	24hrs	CD8T	1.20021e-05	13.1579	0.00808944	Reactome	REACTOME_DAG_AND_IP3_SIGNALING	185	4	CALM1,CAMK4,PRKCA,ITPR2
Blood	24hrs	CD8T	1.20021e-05	13.1579	0.00808944	Reactome	REACTOME_SEMA4D_IN_SEMAPHORIN_SIGNALING	185	4	ROCK2,MYL12B,ROCK1,RAC2
Blood	24hrs	CD8T	1.75067e-06	2.48586	0.00814589	GObp	GO_PHOSPHORYLATION	185	29	CALM1,MAPK10,CAMK4,CDK8,PRKCH,LCK,WNK1,UBA52,PRKCA,ROCK2,CDK13,PRKCQ,PTK2,NDUFA4,MARK3,NPHS1,RICTOR,PKN2,SLK,COX4I1,IL2RG,PSMC1,TNIK,ROCK1,MYO3A,ITPKB,RASA1,UBB,PSMD13
Blood	24hrs	CD8T	2.43058e-06	4.27632	0.00828586	ChemicalGeneticPerturbations	DEURIG_T_CELL_PROLYMPHOCYTIC_LEUKEMIA_DN	185	13	CALM1,ATXN1,THOC1,ARL6IP5,NKG7,TRBC1,CD8A,MAN1A1,CD52,TES,TNIK,CD3D,PPP1R12A
Blood	24hrs	CD8T	1.52759e-05	7.5188	0.010296	Reactome	REACTOME_REGULATION_OF_MRNA_STABILITY_BY_PROTEINS_THAT_BIND_AU_RICH_ELEMENTS	185	6	ZFP36L1,UBA52,PRKCA,PSMC1,TNPO1,PSMD13
Blood	24hrs	CD8T	3.18698e-06	3.53826	0.0108644	ChemicalGeneticPerturbations	SMID_BREAST_CANCER_NORMAL_LIKE_UP	185	16	LCK,ELMO1,CD27,ARHGAP15,NKG7,PRKCQ,TRBC1,CD8A,CD52,IL2RG,CORO1A,RAC2,BANK1,DMD,CD3D,HIVEP2
Blood	24hrs	CD8T	3.55141e-06	11.9617	0.0121068	ChemicalGeneticPerturbations	PARK_HSC_MARKERS	185	5	WNK1,NKG7,ANKRD17,RASA1,ASH1L
Blood	24hrs	CD8T	2.72183e-06	5.39811	0.0126647	GObp	GO_ANTIGEN_RECEPTOR_MEDIATED_SIGNALING_PATHWAY	185	10	LCK,THEMIS,UBA52,PRKCQ,PAG1,TRBC1,PSMC1,UBB,PSMD13,CD3D
Blood	24hrs	CD8T	3.1232e-06	3.72393	0.0145323	GObp	GO_REGULATION_OF_IMMUNE_EFFECTOR_PROCESS	185	15	ITCH,CD226,THOC1,LCK,ELMO1,UBA52,B2M,ABR,SNTG1,KCNQ1,TNIK,RAC2,CD8B,ANKRD17,MBD5
Blood	24hrs	CD8T	8.55167e-05	6.92521	0.0159061	Kegg	KEGG_PHOSPHATIDYLINOSITOL_SIGNALING_SYSTEM	185	5	CALM1,PRKCA,ITPR2,INPP4B,ITPKB
Blood	24hrs	CD8T	9.99217e-05	4.87975	0.0185854	Kegg	KEGG_WNT_SIGNALING_PATHWAY	185	7	MAPK10,CHD8,PRKCA,ROCK2,PPP3CA,ROCK1,RAC2
Blood	24hrs	CD8T	2.76478e-05	5.84795	0.0186346	Reactome	REACTOME_SIGNALING_BY_THE_B_CELL_RECEPTOR_BCR	185	7	CALM1,UBA52,ITPR2,RICTOR,PSMC1,PSMD13,CBL
Blood	24hrs	CD8T	2.92696e-05	5.80191	0.0197277	Reactome	REACTOME_SIGNALING_BY_FGFR_IN_DISEASE	185	7	CALM1,CAMK4,UBA52,PRKCA,ITPR2,RICTOR,CBL
Blood	24hrs	CD8T	4.42437e-06	4.0606	0.0205866	GObp	GO_REGULATION_OF_CELLULAR_COMPONENT_SIZE	185	13	PFN1,ARFIP1,TMSB4Y,ARFGEF1,MACF1,NPHS1,RICTOR,SH3BGRL3,CORO1A,ARPC2,SEMA5B,RASA1,SSH2
Blood	24hrs	CD8T	3.12103e-05	4.55466	0.0210357	Reactome	REACTOME_PLATELET_ACTIVATION_SIGNALING_AND_AGGREGATION	185	9	CALM1,PFN1,PRKCH,LCK,PRKCA,PRKCQ,ITPR2,PTK2,RAC2
Blood	24hrs	CD8T	3.4136e-05	6.6482	0.0230077	Reactome	REACTOME_DOWNSTREAM_SIGNAL_TRANSDUCTION	185	6	CALM1,CAMK4,PRKCA,ITPR2,RICTOR,RASA1
Blood	24hrs	CD8T	0.000134146	4.18958	0.0249511	Kegg	KEGG_FOCAL_ADHESION	185	8	MAPK10,PRKCA,ROCK2,PTK2,MYL12B,ROCK1,RAC2,PPP1R12A
Blood	24hrs	CD8T	0.000135604	5.35236	0.0252223	Kegg	KEGG_LEUKOCYTE_TRANSENDOTHELIAL_MIGRATION	185	6	PRKCA,ROCK2,PTK2,MYL12B,ROCK1,RAC2
Blood	24hrs	CD8T	7.69815e-06	5.35236	0.026243	ChemicalGeneticPerturbations	HAHTOLA_MYCOSIS_FUNGOIDES_SKIN_UP	185	9	CALM1,RAPGEF6,JUND,PFN1,TOX,CD52,TNPO1,EIF3A,HNRNPA1
Blood	24hrs	CD8T	6.22127e-06	4.54076	0.0289476	GObp	GO_LEUKOCYTE_CELL_CELL_ADHESION	185	11	ZFP36L1,LCK,THEMIS,B2M,CD8A,PPP3CA,ROCK1,RAC2,CD8B,ITPKB,CD3D
Blood	24hrs	CD8T	6.29029e-06	5.47612	0.0292687	GObp	GO_REGULATION_OF_PROTEIN_POLYMERIZATION	185	9	PFN1,ARFIP1,TMSB4Y,ARFGEF1,NPHS1,RICTOR,CORO1A,ARPC2,RASA1
Blood	24hrs	CD8T	9.08112e-06	2.11647	0.0309575	ChemicalGeneticPerturbations	BLALOCK_ALZHEIMERS_DISEASE_UP	185	34	JUND,ZFP36L1,THOC1,KDM5A,WNK1,BAZ1A,ZMYM5,EDF1,ZBTB20,ELF2,ZFAND3,CDK13,ARID4A,IL1RAPL1,EEF1A1,TRBC1,MACF1,MARK3,LUC7L2,MFAP1,HEPH,SLK,IL2RG,TES,ROCK1,EIF5B,ITPKB,WRN,DMD,TNPO1,RRBP1,RNASET2,LYST,HNRNPA1
Blood	24hrs	CD8T	0.000669212	3.68421	0.0334606	Hallmark	HALLMARK_MITOTIC_SPINDLE	185	7	RAPGEF6,ABR,ARFGEF1,RICTOR,ROCK1,RASA1,SSH2
Blood	24hrs	CD8T	0.000669212	3.68421	0.0334606	Hallmark	HALLMARK_ALLOGRAFT_REJECTION	185	7	LCK,B2M,CD8A,IL2RG,CD8B,CD3D,EIF3A
Blood	24hrs	CD8T	7.24337e-06	14.5191	0.0337034	GObp	GO_REGULATION_OF_DEFENSE_RESPONSE_TO_VIRUS_BY_VIRUS	185	4	LCK,ELMO1,B2M,CD8B
Blood	24hrs	CD8T	5.06512e-05	6.25326	0.0341389	Reactome	REACTOME_SIGNALING_BY_ERBB2	185	6	CALM1,CAMK4,UBA52,PRKCA,ITPR2,RICTOR
Blood	24hrs	CD8T	5.27156e-05	9.79192	0.0355303	Reactome	REACTOME_PLC_BETA_MEDIATED_EVENTS	185	4	CALM1,CAMK4,PRKCA,ITPR2
Blood	24hrs	CD8T	5.37618e-05	7.5188	0.0362354	Reactome	REACTOME_IMMUNOREGULATORY_INTERACTIONS_BETWEEN_A_LYMPHOID_AND_A_NON_LYMPHOID_CELL	185	5	CD226,B2M,CD8A,CD8B,CD3D
Blood	24hrs	CD8T	7.78909e-06	3.64773	0.0362427	GObp	GO_SIGNAL_TRANSDUCTION_BY_PROTEIN_PHOSPHORYLATION	185	14	CALM1,MAPK10,UBA52,PTK2,MARK3,NPHS1,SLK,IL2RG,PSMC1,TNIK,ITPKB,RASA1,UBB,PSMD13
Blood	24hrs	CD8T	7.8332e-06	6.01504	0.0364479	GObp	GO_NON_CANONICAL_WNT_SIGNALING_PATHWAY	185	8	CALM1,PFN1,TNRC6B,UBA52,PPP3CA,PSMC1,UBB,PSMD13
Blood	24hrs	CD8T	7.98501e-06	4.11452	0.0371543	GObp	GO_REGULATION_OF_HOMOTYPIC_CELL_CELL_ADHESION	185	12	ITCH,CAMK4,LCK,PRKCA,PRKCQ,PAG1,TRBC1,RICTOR,CORO1A,RAC2,ITPKB,CD3D
Blood	24hrs	CD8T	8.47616e-06	3.15048	0.0394396	GObp	GO_CELL_ACTIVATION	185	17	CAMK4,ZFP36L1,PRKCH,LCK,THEMIS,B2M,PRKCA,PRKCQ,ITPR2,CD8A,PPP3CA,CORO1A,RAC2,CD8B,BANK1,ITPKB,CD3D
Blood	24hrs	CD8T	5.96989e-05	2.9294	0.0402371	Reactome	REACTOME_ADAPTIVE_IMMUNE_SYSTEM	185	15	CALM1,CD226,LCK,UBA52,B2M,PRKCQ,ITPR2,PAG1,CD8A,RICTOR,PSMC1,CD8B,PSMD13,CD3D,CBL
Blood	24hrs	CD8T	8.78936e-06	5.93032	0.0408969	GObp	GO_FC_EPSILON_RECEPTOR_SIGNALING_PATHWAY	185	8	CALM1,MAPK10,UBA52,PRKCQ,PPP3CA,PSMC1,UBB,PSMD13
Blood	24hrs	GRAN	1.63886e-10	9.95107	5.58688e-07	ChemicalGeneticPerturbations	HSIAO_HOUSEKEEPING_GENES	60	12	JUND,RPL35,IQGAP1,EEF1A1,B2M,JUNB,MYH9,ATOX1,UBB,DUSP1,FTL,CST3
Blood	24hrs	GRAN	2.96821e-09	26.1552	1.01186e-05	ChemicalGeneticPerturbations	RAMALHO_STEMNESS_DN	60	6	HBA2,GSN,CORO1A,TYROBP,CD53,CST3
Blood	24hrs	GRAN	5.50695e-09	11.43	1.87732e-05	ChemicalGeneticPerturbations	MCLACHLAN_DENTAL_CARIES_UP	60	9	ALOX5AP,SLPI,S100A8,CXCR4,CORO1A,TYROBP,NCF2,CD53,LYZ
Blood	24hrs	GRAN	9.34058e-09	22.2469	3.1842e-05	ChemicalGeneticPerturbations	FLECHNER_BIOPSY_KIDNEY_TRANSPLANT_REJECTED_VS_OK_UP	60	6	S100A8,CXCR4,CORO1A,TYROBP,CD53,GMFG
Blood	24hrs	GRAN	1.86438e-08	20.1613	6.35567e-05	ChemicalGeneticPerturbations	ZAMORA_NOS2_TARGETS_DN	60	6	ALOX5AP,EEF1A1,MYH9,FTL,HP,GMFG
Blood	24hrs	GRAN	1.89039e-08	15.1548	6.44434e-05	ChemicalGeneticPerturbations	HUANG_GATA2_TARGETS_UP	60	7	ALOX5AP,GSN,B2M,TYROBP,HP,CST3,GMFG
Blood	24hrs	GRAN	1.99274e-08	28.8018	6.79324e-05	ChemicalGeneticPerturbations	ZHENG_IL22_SIGNALING_UP	60	5	HBA2,LRG1,SLPI,S100A8,HP
Blood	24hrs	GRAN	2.59445e-08	8.33542	8.84449e-05	ChemicalGeneticPerturbations	CHYLA_CBFA2T3_TARGETS_UP	60	10	ALOX5AP,ATRNL1,SLPI,CERS6,CEBPB,CXCR4,HP,NCF2,TSC22D3,GMFG
Blood	24hrs	GRAN	2.26406e-08	7.40791	0.000105347	GObp	GO_RESPONSE_TO_INORGANIC_SUBSTANCE	60	11	HBA2,JUND,ALOX5AP,HBA1,IQGAP1,GSN,B2M,JUNB,S100A8,DUSP1,HP
Blood	24hrs	GRAN	3.45436e-08	8.10504	0.000117759	ChemicalGeneticPerturbations	TARTE_PLASMA_CELL_VS_PLASMABLAST_UP	60	10	JUND,ALOX5AP,B2M,S100A8,DUSP1,FTL,HP,CST3,TSC22D3,LYZ
Blood	24hrs	GRAN	6.95002e-08	16.6852	0.000236926	ChemicalGeneticPerturbations	MATTIOLI_MGUS_VS_PCL	60	6	JUND,EEF1A1,B2M,JUNB,S100A8,CORO1A
Blood	24hrs	GRAN	1.60437e-07	14.7747	0.000546928	ChemicalGeneticPerturbations	ICHIBA_GRAFT_VERSUS_HOST_DISEASE_35D_UP	60	6	LRG1,IQGAP1,SLPI,S100A8,TYROBP,CD53
Blood	24hrs	GRAN	2.33246e-07	19.2012	0.000795136	ChemicalGeneticPerturbations	RASHI_RESPONSE_TO_IONIZING_RADIATION_6	60	5	SLPI,S100A8,FMNL1,CXCR4,TYROBP
Blood	24hrs	GRAN	3.75326e-07	26.8817	0.00127949	ChemicalGeneticPerturbations	NADLER_OBESITY_DN	60	4	EEF1A1,B2M,UBB,HP
Blood	24hrs	GRAN	2.94675e-07	3.72546	0.00137112	GObp	GO_REGULATION_OF_CELL_DEATH	60	17	HBA2,JUND,HBA1,DOCK8,GSN,JUNB,SYCP2,IGF1R,S100A8,UBB,CEBPB,CHST11,CXCR4,CORO1A,DUSP1,HP,TSC22D3
Blood	24hrs	GRAN	5.64288e-07	24.8139	0.00192366	ChemicalGeneticPerturbations	DUNNE_TARGETS_OF_AML1_MTG8_FUSION_UP	60	4	ALOX5AP,S100A8,CXCR4,LYZ
Blood	24hrs	GRAN	4.16985e-07	26.3331	0.00194023	GObp	GO_CELLULAR_RESPONSE_TO_CALCIUM_ION	60	4	JUND,ALOX5AP,IQGAP1,JUNB
Blood	24hrs	GRAN	6.48873e-07	6.86342	0.00221201	ChemicalGeneticPerturbations	THUM_SYSTOLIC_HEART_FAILURE_UP	60	9	ALOX5AP,UTRN,ANP32A,GSN,GTDC1,CXCR4,TYROBP,CD53,LYZ
Blood	24hrs	GRAN	6.98124e-07	15.9693	0.00237991	ChemicalGeneticPerturbations	WIELAND_UP_BY_HBV_INFECTION	60	5	B2M,CXCR4,TYROBP,CD53,LYZ
Blood	24hrs	GRAN	5.26747e-07	12.4069	0.00245095	GObp	GO_CELLULAR_RESPONSE_TO_INORGANIC_SUBSTANCE	60	6	JUND,ALOX5AP,IQGAP1,GSN,B2M,JUNB
Blood	24hrs	GRAN	7.11729e-07	3.93071	0.00331167	GObp	GO_DEFENSE_RESPONSE	60	15	B2M,CCL15,CCL23,SLPI,S100A8,UBB,CEBPB,CXCR4,CORO1A,TYROBP,HP,HPR,NCF2,CST3,LYZ
Blood	24hrs	GRAN	9.80793e-07	22.2469	0.00334352	ChemicalGeneticPerturbations	JOHANSSON_GLIOMAGENESIS_BY_PDGFB_UP	60	4	EEF1A1,B2M,CHST11,FTL
Blood	24hrs	GRAN	1.07314e-06	3.10803	0.00365832	ChemicalGeneticPerturbations	PILON_KLF1_TARGETS_DN	60	19	ALOX5AP,GAB2,IQGAP1,DOCK8,ANP32A,GSN,ATRNL1,IGF1R,CERS6,CEBPB,FBXL5,CXCR4,CORO1A,CD300LF,TYROBP,HP,TMEM164,CD53,CST3
Blood	24hrs	GRAN	8.24369e-07	7.74969	0.00383579	GObp	GO_RESPONSE_TO_METAL_ION	60	8	JUND,ALOX5AP,IQGAP1,GSN,B2M,JUNB,S100A8,DUSP1
Blood	24hrs	GRAN	5.8566e-06	15.5461	0.00394735	Reactome	REACTOME_AMYLOIDS	60	4	GSN,B2M,CST3,LYZ
Blood	24hrs	GRAN	9.28494e-07	15.2161	0.00432028	GObp	GO_TRANSITION_METAL_ION_HOMEOSTASIS	60	5	B2M,ATOX1,S100A8,FBXL5,FTL
Blood	24hrs	GRAN	1.31198e-06	8.7184	0.00610465	GObp	GO_LEUKOCYTE_MIGRATION	60	7	DOCK8,MYH9,CCL15,CCL23,S100A8,CXCR4,CORO1A
Blood	24hrs	GRAN	1.49872e-06	14.0252	0.00697353	GObp	GO_RESPONSE_TO_CALCIUM_ION	60	5	JUND,ALOX5AP,IQGAP1,JUNB,DUSP1
Blood	24hrs	GRAN	2.1789e-06	18.9753	0.00742787	ChemicalGeneticPerturbations	YAO_TEMPORAL_RESPONSE_TO_PROGESTERONE_CLUSTER_1	60	4	IGF1R,CEBPB,DUSP1,HP
Blood	24hrs	GRAN	1.65791e-06	13.7855	0.00771427	GObp	GO_LEUKOCYTE_CHEMOTAXIS	60	5	CCL15,CCL23,S100A8,CXCR4,CORO1A
Blood	24hrs	GRAN	2.77999e-06	9.67742	0.00947698	ChemicalGeneticPerturbations	LEE_DIFFERENTIATING_T_LYMPHOCYTE	60	6	DOCK8,CXCR4,CORO1A,ARHGAP25,CD53,GMFG
Blood	24hrs	GRAN	2.8914e-06	7.8405	0.00985677	ChemicalGeneticPerturbations	POOLA_INVASIVE_BREAST_CANCER_UP	60	7	GAB2,CHST11,CXCR4,NCF2,ARHGAP25,CD53,LYZ
Blood	24hrs	GRAN	3.07472e-06	3.73234	0.0104817	ChemicalGeneticPerturbations	CHEN_METABOLIC_SYNDROM_NETWORK	60	14	ALOX5AP,DOCK8,GSN,PLXDC2,SLPI,S100A8,CERS6,CORO1A,TYROBP,NCF2,ARHGAP25,TMEM164,CD53,GMFG
Blood	24hrs	GRAN	3.8141e-06	7.55206	0.0130023	ChemicalGeneticPerturbations	WALLACE_PROSTATE_CANCER_RACE_UP	60	7	ALOX5AP,CXCR4,CORO1A,ARHGAP25,CD53,LYZ,GMFG
Blood	24hrs	GRAN	4.8945e-06	5.47778	0.0166853	ChemicalGeneticPerturbations	ENK_UV_RESPONSE_KERATINOCYTE_UP	60	9	JUND,RPL35,GSN,B2M,JUNB,UBB,FMNL1,CEBPB,DUSP1
Blood	24hrs	GRAN	5.19279e-06	15.9299	0.0177022	ChemicalGeneticPerturbations	MUNSHI_MULTIPLE_MYELOMA_UP	60	4	JUND,EEF1A1,UBB,CXCR4
Blood	24hrs	GRAN	6.23391e-06	10.9721	0.0212514	ChemicalGeneticPerturbations	PODAR_RESPONSE_TO_ADAPHOSTIN_UP	60	5	JUND,GAB2,CEBPB,DUSP1,NCF2
Blood	24hrs	GRAN	6.58514e-06	15.1803	0.0224488	ChemicalGeneticPerturbations	GALINDO_IMMUNE_RESPONSE_TO_ENTEROTOXIN	60	4	JUNB,UBB,CEBPB,DUSP1
Blood	24hrs	GRAN	5.12705e-06	2.92664	0.0238562	GObp	GO_IMMUNE_SYSTEM_PROCESS	60	18	GAB2,DOCK8,B2M,JUNB,MYH9,CCL15,CCL23,SLPI,IGF1R,S100A8,UBB,CEBPB,CXCR4,CORO1A,CD300LF,TYROBP,HP,NCF2
Blood	24hrs	GRAN	7.27363e-06	10.6815	0.0247958	ChemicalGeneticPerturbations	IGLESIAS_E2F_TARGETS_UP	60	5	HBA2,GSN,B2M,TYROBP,CD53
Blood	24hrs	GRAN	8.48357e-06	8.1666	0.0394741	GObp	GO_DEFENSE_RESPONSE_TO_BACTERIUM	60	6	B2M,SLPI,S100A8,CEBPB,HP,LYZ
Blood	24hrs	Ly6c+.Mon	9.77892e-25	5.17688	3.33363e-21	ChemicalGeneticPerturbations	DACOSTA_UV_RESPONSE_VIA_ERCC3_DN	243	54	RUNX1,TLK2,CDK8,CASK,DDX17,MYCBP2,BAZ1B,SIK3,SMURF2,SMC5,ASCC3,ATAD2B,ZFYVE9,FNDC3A,ITPR1,USP6,SGMS1,CSNK2A1,PAFAH1B1,USP15,PTEN,PHF21A,BAZ2B,ALCAM,CREBBP,STRN3,CLASP2,ZEB2,NIPBL,LYN,VPS13A,WRN,SPAG9,UBE2D2,PKN2,CHD9,PTPN12,MACF1,SETX,ROCK1,MEF2A,RB1CC1,CLIP1,FAM172A,EIF3A,SMARCA5,QKI,ANKLE2,BMP2K,DNAJC2,CEP170,PPP1R12A,CEP350,GRK5
Blood	24hrs	Ly6c+.Mon	1.94989e-17	5.76995	6.64718e-14	ChemicalGeneticPerturbations	DACOSTA_UV_RESPONSE_VIA_ERCC3_COMMON_DN	243	34	RUNX1,TLK2,CDK8,CASK,MYCBP2,SIK3,SMURF2,SMC5,ASCC3,ATAD2B,ZFYVE9,FNDC3A,USP6,PAFAH1B1,PHF21A,BAZ2B,MGAT5,CREBBP,STRN3,CLASP2,NIPBL,LYN,VPS13A,WRN,UBE2D2,PKN2,CHD9,PTPN12,MEF2A,CLIP1,QKI,CEP170,PPP1R12A,CEP350
Blood	24hrs	Ly6c+.Mon	3.58845e-15	4.04898	1.2233e-11	ChemicalGeneticPerturbations	CUI_TCF21_TARGETS_2_DN	243	41	DOCK5,CALM1,PRKCH,RIOK3,ARHGAP24,NEDD9,LATS2,VPS54,PAG1,FRY,FNDC3A,SIRPA,MBNL2,SGMS1,CXCR4,MGAT5,CREBBP,ZEB2,FGD4,VPS13A,PTPRC,HIP1,PTPN12,MACF1,ZC3HAV1,CEBPB,PDE4B,CELF2,LNPEP,ARHGAP31,ROCK1,CLIP1,ATP7A,PDE10A,LRBA,QKI,ITGA4,AHNAK,HEATR5A,GRK5,DUSP6
Blood	24hrs	Ly6c+.Mon	6.54436e-14	3.97797	2.23097e-10	ChemicalGeneticPerturbations	ONKEN_UVEAL_MELANOMA_UP	243	38	CALM1,POMP,YWHAZ,ACIN1,BAZ1B,EMP3,HERC2,PRPF4B,LY6E,UBE2K,FRY,B2M,PHF21A,BAZ2B,CXCR4,LGALS3,ZEB2,LYN,PTPRC,ARPC2,SH3BGRL3,TYROBP,MACF1,IFITM2,IFITM1,IFITM3,TAPBP,SP110,CELF2,RB1CC1,CLIP1,SMARCA5,PDE10A,TNFAIP2,DNAJC2,FCER1G,SFPQ,PPP1R12A
Blood	24hrs	Ly6c+.Mon	6.57935e-14	5.00818	2.2429e-10	ChemicalGeneticPerturbations	ZHENG_BOUND_BY_FOXP3	243	30	PRKCH,SIK3,ITM2B,LATS2,UTRN,PTK2B,VPS54,PAG1,ARHGAP15,AGGF1,PELI1,SGMS1,MAP4K4,IRF2,MGAT5,TOP2B,NIPBL,PTPRC,FAM107B,LLPH,CLEC2D,MACF1,ZC3HAV1,PDE4B,CELF2,HECTD1,STK17B,HEATR5A,CNOT6L,DUSP6
Blood	24hrs	Ly6c+.Mon	5.21577e-13	2.57706	1.77806e-09	ChemicalGeneticPerturbations	PILON_KLF1_TARGETS_DN	243	62	DOCK5,CALM1,MYCBP2,RIOK3,NEDD9,HSD17B11,KDM6B,ALOX5AP,BAZ1B,SIK3,SMURF2,YWHAE,LY6E,OGFRL1,PARP9,VPS54,WNK1,BIRC3,PAG1,FRY,ACTR2,ARHGAP15,STIM2,ITPR1,RERE,PTEN,CXCR4,LGALS3,ZEB2,ARF6,DOCK11,PTPRC,CGGBP1,UBE2D2,FAM107B,GSR,MAPRE2,CD52,TYROBP,PTPN12,IFITM1,CYLD,PLAC8,CEBPB,GDA,SETX,CELF2,SYK,HNRNPM,GNG12,ANKIB1,CLIP1,FAM172A,STK17B,QKI,CST3,ITGA4,ANKLE2,FCER1G,AHNAK,HEATR5A,CNOT6L
Blood	24hrs	Ly6c+.Mon	1.50341e-12	3.76861	5.12512e-09	ChemicalGeneticPerturbations	KRIGE_RESPONSE_TO_TOSEDOSTAT_24HR_UP	243	36	MYO5A,RIOK3,KDM6B,ALOX5AP,ITM2B,UTRN,PTK2B,ATAD2B,OGFRL1,SLFN13,WNK1,PAG1,RARA,ITPR1,PDCD4,MBNL2,EEF1A1,PHF21A,BAZ2B,PTPRC,HIP1,CCNI,TYROBP,LMO4,CYLD,GOLGB1,CEBPB,SYK,LNPEP,MEF2A,CLIP1,TNFAIP2,TSC22D3,BMP2K,FCER1G,DUSP6
Blood	24hrs	Ly6c+.Mon	1.51351e-12	3.68057	5.15957e-09	ChemicalGeneticPerturbations	KOINUMA_TARGETS_OF_SMAD2_OR_SMAD3	243	37	DOCK5,RUNX1,RTN4,PRKCH,YWHAZ,RIOK3,PIM1,BAZ1B,SMURF2,WDR89,AGGF1,MBNL2,SGMS1,JUNB,MOB3B,ALCAM,LGALS3,PRKAG2,FCHO2,SPAG9,FAM107B,MAPRE2,CHD9,SYK,LNPEP,GNG12,MEF2A,CMIP,CLIP1,QKI,DNAJC2,AHNAK,DENND4A,CEP350,MBTD1,VPS13C,DUSP6
Blood	24hrs	Ly6c+.Mon	1.13e-11	6.62714	3.85218e-08	ChemicalGeneticPerturbations	RUTELLA_RESPONSE_TO_HGF_DN	243	19	NEDD9,SIK3,LRRK1,PELI1,RERE,MAP4K4,CXCR4,MAPRE2,CCNI,CD52,IFITM2,PLAC8,VCAN,SP110,CELF2,STK17B,ITGA4,SETD1B,DUSP6
Blood	24hrs	Ly6c+.Mon	1.64423e-11	5.0184	5.60518e-08	ChemicalGeneticPerturbations	LINDGREN_BLADDER_CANCER_CLUSTER_2B	243	24	CALM1,PRKCH,MYO5A,YWHAZ,ALOX5AP,EMP3,LATS2,BIRC3,ARHGAP15,PELI1,SIRPA,MOB3B,CXCR4,ARPC2,CD52,IFITM2,IFITM1,IFITM3,CELF2,LYZ,TSC22D3,ITGA4,BMP2K,GRK5
Blood	24hrs	Ly6c+.Mon	3.54399e-11	7.1094	1.20815e-07	ChemicalGeneticPerturbations	ZHENG_FOXP3_TARGETS_IN_THYMUS_UP	243	17	SIK3,LATS2,SMC5,VPS54,WNK1,ARHGAP15,PELI1,SGMS1,CXCR4,STRN3,TOP2B,CHD9,ZC3HAV1,PDE4B,CELF2,HEATR5A,CNOT6L
Blood	24hrs	Ly6c+.Mon	4.96444e-11	6.96721	1.69238e-07	ChemicalGeneticPerturbations	LEE_DIFFERENTIATING_T_LYMPHOCYTE	243	17	CCND3,PRKCH,MYCBP2,PAG1,ARHGAP15,CXCR4,PTPRC,FAM107B,UCP2,CD52,SP110,CELF2,LNPEP,SFPQ,CNOT6L,CEP350,ATP8A1
Blood	24hrs	Ly6c+.Mon	2.27869e-10	3.98759	7.76805e-07	ChemicalGeneticPerturbations	FLECHNER_BIOPSY_KIDNEY_TRANSPLANT_OK_VS_DONOR_UP	243	27	SMURF2,EIF3F,YWHAE,BIRC3,ACTR2,FNDC3A,RERE,PAFAH1B1,CREBBP,STRN3,CLASP2,TOP2B,ZEB2,VPS13A,ARF6,PTPRC,H2AFZ,PKN2,PTPN12,TAPBP,VCAN,ROCK1,LYZ,QKI,ZC3H15,BMP2K,ATP8A1
Blood	24hrs	Ly6c+.Mon	4.24101e-10	3.09635	1.44576e-06	ChemicalGeneticPerturbations	KRIGE_RESPONSE_TO_TOSEDOSTAT_6HR_UP	243	36	MYO5A,RIOK3,KDM6B,ALOX5AP,ITM2B,UTRN,PTK2B,ATAD2B,OGFRL1,SLFN13,WNK1,PAG1,RARA,ITPR1,PDCD4,MBNL2,PHF21A,BAZ2B,ZEB2,PTPRC,HIP1,CCNI,TYROBP,LMO4,CYLD,GOLGB1,CEBPB,SYK,LNPEP,MEF2A,LYZ,CLIP1,TSC22D3,BMP2K,FCER1G,DUSP6
Blood	24hrs	Ly6c+.Mon	2.69491e-09	34.153	1.81637e-06	Reactome	REACTOME_SIGNAL_REGULATORY_PROTEIN_SIRP_FAMILY_INTERACTIONS	243	5	SIRPB1,SIRPG,PTK2B,SIRPA,TYROBP
Blood	24hrs	Ly6c+.Mon	7.20493e-10	3.78958	2.45616e-06	ChemicalGeneticPerturbations	SPIELMAN_LYMPHOBLAST_EUROPEAN_VS_ASIAN_DN	243	27	XDH,MYO5A,YWHAZ,RIOK3,PDCD10,ITM2B,UTRN,RASSF2,UBE2K,ACTR2,YTHDC1,ITPR1,RERE,RAD50,PTEN,IRF2,SPAG9,PTPRC,CGGBP1,UBE2D2,PTPN12,CLEC2D,IFITM1,PDE4B,SYK,SFPQ,GRK5
Blood	24hrs	Ly6c+.Mon	1.16766e-09	3.95595	3.98056e-06	ChemicalGeneticPerturbations	MILI_PSEUDOPODIA_HAPTOTAXIS_UP	243	25	TLK2,MYO5A,RIOK3,PDCD10,SMC5,OGFRL1,VPS54,EIF4G2,ACTR2,FNDC3A,AGGF1,YTHDC1,MBNL2,PAFAH1B1,NIPBL,VPS13A,ARF6,DOCK11,UBE2D2,CELF2,ROCK1,MEF2A,NUFIP2,QKI,PPP1R12A
Blood	24hrs	Ly6c+.Mon	9.37925e-10	2.56148	4.36417e-06	GObp	GO_REGULATION_OF_CELL_DEATH	243	46	RTN4,XDH,HBA2,PRKCH,YWHAZ,JUND,PDCD10,ACIN1,PIM1,HBA1,GPX1,LATS2,YWHAE,PTK2B,VAV3,RASSF2,BIRC3,RARA,PDCD4,JUNB,CSNK2A1,PTEN,MAP4K4,CXCR4,LGALS3,CREBBP,FGD4,LYN,WRN,HIP1,UCP2,CYLD,PLAC8,CEBPB,SETX,ROCK1,FN1,RB1CC1,STK17B,AMBRA1,TSC22D3,FCER1G,SFPQ,NCL,GRK5,DUSP6
Blood	24hrs	Ly6c+.Mon	1.2175e-09	3.03904	5.66503e-06	GObp	GO_PROTEIN_PHOSPHORYLATION	243	35	CALM1,TLK2,CDK8,PRKCH,CASK,RIOK3,PIM1,BAZ1B,SIK3,PRPF4B,LATS2,PTK2B,RASSF2,WNK1,LRRK1,RARA,CSNK2A1,USP15,MAP4K4,NPHS1,LYN,PRKAG2,MYO3A,SPAG9,PKN2,SETX,SYK,ROCK1,MEF2A,RB1CC1,STK17B,MAPKAPK2,BMP2K,GRK5,DUSP6
Blood	24hrs	Ly6c+.Mon	1.40174e-09	3.15259	6.5223e-06	GObp	GO_REGULATION_OF_IMMUNE_RESPONSE	243	33	CALM1,PRKCH,FOS,GPX1,ARPC4,VAV3,PARP9,UBE2K,BIRC3,PAG1,ACTR2,RARA,PELI1,B2M,PTEN,LGALS3,CREBBP,LYN,CYBA,PTPRC,ARPC2,UBE2D2,TYROBP,CLEC2D,IFITM1,CYLD,ZC3HAV1,PDE4B,SYK,MAPKAPK2,ITGA4,FCER1G,RC3H1
Blood	24hrs	Ly6c+.Mon	2.47862e-09	4.26307	8.4496e-06	ChemicalGeneticPerturbations	THUM_SYSTOLIC_HEART_FAILURE_UP	243	22	YWHAZ,RIOK3,ARHGAP24,HSD17B11,ALOX5AP,SLC8A1,PRPF4B,UTRN,YWHAE,ACTR2,RARA,MBNL2,CXCR4,LYN,ARF6,PTPRC,CD52,TYROBP,VCAN,LYZ,MAPKAPK2,FCER1G
Blood	24hrs	Ly6c+.Mon	1.76172e-07	5.32787	8.80861e-06	Hallmark	HALLMARK_INTERFERON_GAMMA_RESPONSE	243	13	PIM1,LATS2,LY6E,MARCH1,PELI1,B2M,IRF2,IFITM2,IFITM3,TAPBP,PDE4B,SP110,TNFAIP2
Blood	24hrs	Ly6c+.Mon	4.65034e-09	2.50108	1.5853e-05	ChemicalGeneticPerturbations	PUJANA_ATM_PCC_NETWORK	243	44	RUNX1,CASK,RIOK3,SIRPB1,PDCD10,ALOX5AP,BAZ1B,PRPF4B,ITM2B,EIF3F,SMC5,RASSF2,ACTR2,AGGF1,YTHDC1,EEF1A1,B2M,CSNK2A1,TMSB4Y,PTEN,CXCR4,IRF2,TOP2B,LYN,ARF6,PTPRC,ARPC2,GSR,H2AFZ,UCP2,CD52,CEBPZ,ZC3HAV1,SP110,SYK,HNRNPM,ROCK1,RB1CC1,STK17B,SMARCA5,ITGA4,DNAJC2,SFPQ,NCL
Blood	24hrs	Ly6c+.Mon	4.69036e-09	3.82726	1.59895e-05	ChemicalGeneticPerturbations	SCHAEFFER_PROSTATE_DEVELOPMENT_6HR_DN	243	24	YWHAZ,KDM6B,SLC8A1,ARPC4,YWHAE,VPS54,WNK1,BAZ2B,CREBBP,STRN3,ZEB2,PLCB1,GSR,LLPH,CHD9,CCNI,MACF1,NUFIP2,SENP2,EIF3A,SMARCA5,DNAJC2,SFPQ,AHNAK
Blood	24hrs	Ly6c+.Mon	6.94518e-07	5.60024	3.47259e-05	Hallmark	HALLMARK_APOPTOSIS	243	11	NEDD9,GPX1,BIRC3,RARA,PDCD4,LGALS3,CREBBP,GSR,IFITM3,CYLD,ROCK1
Blood	24hrs	Ly6c+.Mon	1.02523e-08	6.13658	3.495e-05	ChemicalGeneticPerturbations	TONKS_TARGETS_OF_RUNX1_RUNX1T1_FUSION_HSC_DN	243	14	CCND3,JUND,ALOX5AP,RASSF2,BIRC3,RARA,CXCR4,GSR,SH3BGRL3,CD52,TYROBP,PTPN12,PLAC8,SETX
Blood	24hrs	Ly6c+.Mon	1.22548e-08	4.68384	4.17765e-05	ChemicalGeneticPerturbations	RUTELLA_RESPONSE_TO_CSF2RB_AND_IL4_DN	243	18	NEDD9,SIK3,ITPR1,PELI1,SGMS1,RERE,LGALS3,GSR,MAPRE2,CD52,IFITM2,PLAC8,VCAN,SP110,STK17B,ITGA4,SETD1B,DUSP6
Blood	24hrs	Ly6c+.Mon	1.24487e-08	15.5073	4.24375e-05	ChemicalGeneticPerturbations	ZHENG_FOXP3_TARGETS_IN_T_LYMPHOCYTE_DN	243	7	UTRN,PTK2B,WNK1,BACH2,PELI1,NIPBL,PTPRC
Blood	24hrs	Ly6c+.Mon	1.39826e-08	3.50887	4.76667e-05	ChemicalGeneticPerturbations	HAMAI_APOPTOSIS_VIA_TRAIL_UP	243	25	MYO5A,MYCBP2,PDCD10,BAZ1B,AGGF1,ITPR1,RAD50,PTEN,BAZ2B,TOP2B,NIPBL,WRN,LLPH,CEBPZ,GOLGB1,SETX,CELF2,RB1CC1,CLIP1,EIF3A,ZC3H15,CEP170,CEP350,NCL,VPS13C
Blood	24hrs	Ly6c+.Mon	1.1948e-08	2.60319	5.55943e-05	GObp	GO_PHOSPHORYLATION	243	39	CALM1,TLK2,CDK8,PRKCH,CASK,RIOK3,PIM1,BAZ1B,SIK3,PRPF4B,LATS2,PTK2B,RASSF2,WNK1,UQCRQ,LRRK1,RARA,SGMS1,CSNK2A1,RAD50,USP15,MAP4K4,NPHS1,LYN,PRKAG2,MYO3A,SPAG9,PKN2,SETX,SYK,ROCK1,MEF2A,RB1CC1,NDUFB5,STK17B,MAPKAPK2,BMP2K,GRK5,DUSP6
Blood	24hrs	Ly6c+.Mon	1.8615e-08	7.77275	6.34587e-05	ChemicalGeneticPerturbations	IKEDA_MIR30_TARGETS_UP	243	11	CALM1,YWHAZ,PDCD10,FNDC3A,PELI1,USP15,MAP4K4,UBE2D2,CHD9,CELF2,PPP1R12A
Blood	24hrs	Ly6c+.Mon	1.36559e-08	6.00807	6.35409e-05	GObp	GO_RESPONSE_TO_REACTIVE_OXYGEN_SPECIES	243	14	HBA2,FOS,PDCD10,KDM6B,SLC8A1,HBA1,GPX1,PTK2B,CYBA,GSR,UCP2,SETX,FN1,ATP7A
Blood	24hrs	Ly6c+.Mon	1.84522e-08	2.45376	8.58581e-05	GObp	GO_REGULATION_OF_IMMUNE_SYSTEM_PROCESS	243	42	RUNX1,CALM1,PRKCH,FOS,SIRPG,ACIN1,GPX1,ARPC4,PTK2B,VAV3,RASSF2,PARP9,UBE2K,BIRC3,PAG1,ACTR2,RARA,PELI1,B2M,CRNKL1,PTEN,LGALS3,CREBBP,LYN,CYBA,PLCB1,PTPRC,ARPC2,UBE2D2,TYROBP,CLEC2D,IFITM1,CYLD,ZC3HAV1,CEBPB,PDE4B,SYK,MAPKAPK2,TSC22D3,ITGA4,FCER1G,RC3H1
Blood	24hrs	Ly6c+.Mon	2.83444e-08	4.96771	9.6626e-05	ChemicalGeneticPerturbations	DURCHDEWALD_SKIN_CARCINOGENESIS_DN	243	16	RUNX1,XDH,YWHAZ,FOS,HBA1,PRPF4B,UTRN,STIM2,MAP4K4,CREBBP,GSR,PTPN12,MACF1,CLIP1,QKI,CEP350
Blood	24hrs	Ly6c+.Mon	3.38595e-08	2.77427	0.000115427	ChemicalGeneticPerturbations	GRYDER_PAX3FOXO1_ENHANCERS_IN_TADS	243	33	RUNX1,POMP,CASK,YWHAZ,ALOX5AP,HERC2,SMC5,ASCC3,ATAD2B,WNK1,ARHGAP15,STIM2,ITPR1,SGMS1,RERE,USP15,RIMKLB,MAP4K4,CREBBP,ZEB2,ARPC2,PKN2,PTPN12,LMO4,CEBPZ,SETX,CELF2,GNG12,ST3GAL4,SENP2,EIF3A,QKI,DUSP6
Blood	24hrs	Ly6c+.Mon	2.90394e-06	6.76018	0.000145197	Hallmark	HALLMARK_INTERFERON_ALPHA_RESPONSE	243	8	LY6E,PARP9,B2M,IRF2,IFITM2,IFITM1,IFITM3,SP110
Blood	24hrs	Ly6c+.Mon	4.30319e-08	8.11557	0.000146696	ChemicalGeneticPerturbations	WIELAND_UP_BY_HBV_INFECTION	243	10	B2M,CXCR4,LGALS3,UCP2,TYROBP,TAPBP,PLAC8,SP110,LYZ,FCER1G
Blood	24hrs	Ly6c+.Mon	6.03097e-08	5.0184	0.000205596	ChemicalGeneticPerturbations	RUTELLA_RESPONSE_TO_HGF_VS_CSF2RB_AND_IL4_DN	243	15	RUNX1,BIRC3,LRRK1,PELI1,MAP4K4,CXCR4,CCNI,PLAC8,VCAN,CELF2,STK17B,ITGA4,SETD1B,PPP1R12A,CEP350
Blood	24hrs	Ly6c+.Mon	6.21985e-08	32.7869	0.000212035	ChemicalGeneticPerturbations	TSUDA_ALVEOLAR_SOFT_PART_SARCOMA	243	4	PIM1,LYN,PRKAG2,MAPKAPK2
Blood	24hrs	Ly6c+.Mon	6.5864e-08	2.93101	0.00022453	ChemicalGeneticPerturbations	BUYTAERT_PHOTODYNAMIC_THERAPY_STRESS_UP	243	29	CDK8,RIOK3,FOS,JUND,KDM6B,PIM1,SIK3,SMC5,PDCD4,MBNL2,CSNK2A1,PAFAH1B1,BAZ2B,LGALS3,CREBBP,ZEB2,NIPBL,FTL,WRN,SPAG9,GOLGB1,ZC3HAV1,CEBPB,MEF2A,RB1CC1,STK17B,EIF3A,PDE10A,SFPQ
Blood	24hrs	Ly6c+.Mon	4.1631e-07	2.6356	0.000280593	Reactome	REACTOME_IMMUNE_SYSTEM	243	30	CALM1,YWHAZ,FOS,HERC2,SMURF2,PTK2B,UBE2K,BIRC3,PAG1,EIF4G2,PELI1,B2M,PTEN,IRF2,LGALS3,CREBBP,LYN,CYBA,PTPRC,UBE2D2,TYROBP,IFITM2,IFITM1,IFITM3,CYLD,SYK,LNPEP,MEF2A,MAPKAPK2,DUSP6
Blood	24hrs	Ly6c+.Mon	8.97863e-08	5.2161	0.000306082	ChemicalGeneticPerturbations	RIGGINS_TAMOXIFEN_RESISTANCE_DN	243	14	CASK,NEDD9,VAV3,UBE2K,ALCAM,CXCR4,PLCB1,PTPN12,IFITM2,IFITM3,SMARCA5,PDE10A,LRBA,MAPKAPK2
Blood	24hrs	Ly6c+.Mon	9.30525e-08	3.77729	0.000317216	ChemicalGeneticPerturbations	BAELDE_DIABETIC_NEPHROPATHY_DN	243	20	DDX17,YWHAZ,NEDD9,YWHAE,BIRC3,FRY,SGMS1,PAFAH1B1,NPHS1,TOP2B,ARF6,UBE2D2,IFITM1,TAPBP,VCAN,ZC3HAV1,PDE4B,ATP7A,TSC22D3,GRK5
Blood	24hrs	Ly6c+.Mon	7.44178e-08	2.11448	0.000346266	GObp	GO_PHOSPHATE_CONTAINING_COMPOUND_METABOLIC_PROCESS	243	51	CALM1,TLK2,CDK8,XDH,PRKCH,CASK,RIOK3,PIM1,BAZ1B,SIK3,PRPF4B,GPX1,LATS2,PTK2B,RASSF2,WNK1,UQCRQ,LRRK1,RARA,SGMS1,CSNK2A1,PAFAH1B1,RAD50,USP15,PTEN,MAP4K4,NPHS1,LYN,PRKAG2,PLCB1,MYO3A,SPAG9,PTPRC,PKN2,DDHD1,PTPN12,GDA,PDE4B,SETX,SYK,ROCK1,MEF2A,RB1CC1,NDUFB5,STK17B,PDE10A,MAPKAPK2,BMP2K,PPP1R12A,GRK5,DUSP6
Blood	24hrs	Ly6c+.Mon	1.05504e-07	4.53798	0.000359663	ChemicalGeneticPerturbations	GABRIELY_MIR21_TARGETS	243	16	MYCBP2,UTRN,SMC5,ATAD2B,PARP9,VPS54,WNK1,PAG1,ACTR2,PELI1,PDCD4,FBXL17,LCORL,NIPBL,VPS13A,HECTD1
Blood	24hrs	Ly6c+.Mon	7.80887e-08	2.97676	0.000363347	GObp	GO_REGULATION_OF_CELLULAR_COMPONENT_MOVEMENT	243	28	DOCK5,RTN4,NRG3,PDCD10,SLC8A1,SMURF2,PTK2B,CCAR1,CTNNA3,PTEN,CXCR4,LGALS3,CLASP2,LYN,PLCB1,SPAG9,PTPRC,UNC5D,SH3BGRL3,PKN2,LMO4,MACF1,IFITM1,PDE4B,ROCK1,FN1,ITGA4,ATP8A1
Blood	24hrs	Ly6c+.Mon	1.06768e-07	8.47937	0.000363973	ChemicalGeneticPerturbations	FLECHNER_BIOPSY_KIDNEY_TRANSPLANT_REJECTED_VS_OK_UP	243	9	CCND3,RASSF2,CXCR4,PTPRC,CD52,TYROBP,IFITM1,CELF2,FCER1G
Blood	24hrs	Ly6c+.Mon	1.07224e-07	5.14592	0.000365528	ChemicalGeneticPerturbations	CHEN_HOXA5_TARGETS_9HR_UP	243	14	TLK2,FOS,NEDD9,ATAD2B,BIRC3,PELI1,JUNB,STRN3,CHD9,CEBPB,DNAJC2,SFPQ,PPP1R12A,DUSP6
Blood	24hrs	Ly6c+.Mon	8.3492e-08	2.83624	0.000388488	GObp	GO_POSITIVE_REGULATION_OF_IMMUNE_SYSTEM_PROCESS	243	30	RUNX1,PRKCH,FOS,SIRPG,ACIN1,ARPC4,PTK2B,VAV3,UBE2K,BIRC3,PAG1,ACTR2,RARA,PELI1,B2M,PTEN,LGALS3,CREBBP,LYN,CYBA,PTPRC,ARPC2,UBE2D2,CYLD,ZC3HAV1,PDE4B,SYK,MAPKAPK2,ITGA4,FCER1G
Blood	24hrs	Ly6c+.Mon	1.06138e-07	2.30739	0.000493861	GObp	GO_REGULATION_OF_CELL_DIFFERENTIATION	243	42	RUNX1,RTN4,XDH,PRKCH,DDX17,NRG3,FOS,JUND,ACIN1,PTK2B,RASSF2,IL1RAPL1,RARA,PDCD4,B2M,JUNB,PAFAH1B1,PTEN,CXCR4,LGALS3,CLASP2,ZEB2,LYN,ARF6,PLCB1,SPAG9,UNC5D,ARPC2,TYROBP,LMO4,MACF1,IFITM1,CYLD,CEBPB,SETX,SYK,ROCK1,MEF2A,FN1,PPP1R12A,RC3H1,DUSP6
Blood	24hrs	Ly6c+.Mon	1.82447e-07	8.01853	0.000621962	ChemicalGeneticPerturbations	DE_YY1_TARGETS_DN	243	9	AGGF1,PAFAH1B1,PTEN,PKN2,MACF1,CYLD,FN1,RASSF3,ITGA4
Blood	24hrs	Ly6c+.Mon	2.12301e-07	3.59505	0.000723734	ChemicalGeneticPerturbations	MARTENS_BOUND_BY_PML_RARA_FUSION	243	20	CCND3,RUNX1,JUND,ALOX5AP,LATS2,RARA,ITPR1,SIRPA,PTEN,LYN,SH3BGRL3,HIP1,TYROBP,IFITM3,PLAC8,CELF2,HNRNPM,TNFAIP2,ITGA4,GRK5
Blood	24hrs	Ly6c+.Mon	3.46298e-06	16.3934	0.000751467	Biocarta	BIOCARTA_CCR5_PATHWAY	243	4	CALM1,FOS,PTK2B,CXCR4
Blood	24hrs	Ly6c+.Mon	1.68026e-07	2.24211	0.000781825	GObp	GO_INTRACELLULAR_SIGNAL_TRANSDUCTION	243	43	DOCK5,CALM1,TLK2,PRKCH,NRG3,SIRPG,PDCD10,SLC8A1,GPX1,LATS2,YWHAE,PTK2B,VAV3,UBE2K,WNK1,BIRC3,PAG1,LRRK1,ITPR1,PTEN,MAP4K4,CXCR4,NPHS1,LYN,ARF6,PRKAG2,DOCK11,PLCB1,SPAG9,PKN2,TYROBP,CYLD,CEBPB,SETX,SYK,ARHGAP31,ROCK1,MEF2A,RB1CC1,STK17B,MAPKAPK2,CNOT6L,DUSP6
Blood	24hrs	Ly6c+.Mon	2.7408e-07	3.10286	0.000934339	ChemicalGeneticPerturbations	NAKAMURA_TUMOR_ZONE_PERIPHERAL_VS_CENTRAL_DN	243	24	XDH,FOS,HSD17B11,ITM2B,BIRC3,PAG1,FNDC3A,PDCD4,EEF1A1,RERE,JUNB,PTEN,SH3BGRL3,MACF1,IFITM1,TAPBP,CEBPB,PDE4B,NUFIP2,RB1CC1,QKI,TNFAIP2,DRAM2,SFPQ
Blood	24hrs	Ly6c+.Mon	3.01196e-07	6.05127	0.00102678	ChemicalGeneticPerturbations	TSAI_RESPONSE_TO_IONIZING_RADIATION	243	11	BIRC3,JUNB,RAD50,LGALS3,CCNI,IFITM1,ROCK1,FN1,NDUFB5,TSC22D3,DUSP6
Blood	24hrs	Ly6c+.Mon	3.77361e-07	3.34886	0.00128642	ChemicalGeneticPerturbations	MARTORIATI_MDM4_TARGETS_FETAL_LIVER_DN	243	21	DDX17,PIM1,BAZ1B,UTRN,OGFRL1,ACTR2,CCAR1,PELI1,MBNL2,PTEN,ALCAM,LMO4,MEF2A,NUFIP2,FAM172A,QKI,MAPKAPK2,SFPQ,CNOT6L,NCL,ATP8A1
Blood	24hrs	Ly6c+.Mon	4.53036e-07	8.40689	0.0015444	ChemicalGeneticPerturbations	RHEIN_ALL_GLUCOCORTICOID_THERAPY_UP	243	8	DDX17,BIRC3,PELI1,PTPRC,CEBPB,LYZ,AHNAK,GRK5
Blood	24hrs	Ly6c+.Mon	4.9564e-07	9.89259	0.00168964	ChemicalGeneticPerturbations	JI_RESPONSE_TO_FSH_DN	243	7	CDK8,YWHAZ,PRPF4B,TOP2B,ARF6,VCAN,FN1
Blood	24hrs	Ly6c+.Mon	3.64582e-05	4.09836	0.00182291	Hallmark	HALLMARK_COMPLEMENT	243	10	CALM1,PIM1,USP15,IRF2,LGALS3,LYN,CEBPB,FN1,FCER1G,DUSP6
Blood	24hrs	Ly6c+.Mon	9.75057e-06	9.996	0.00211587	Biocarta	BIOCARTA_FCER1_PATHWAY	243	5	CALM1,FOS,LYN,SYK,FCER1G
Blood	24hrs	Ly6c+.Mon	6.22908e-07	3.36621	0.00212349	ChemicalGeneticPerturbations	RODWELL_AGING_KIDNEY_UP	243	20	CCND3,EMP3,GPX1,LY6E,BIRC3,MARCH1,CXCR4,ZEB2,LYN,DOCK11,PTPRC,TYROBP,IFITM1,TAPBP,VCAN,CELF2,FN1,LYZ,TNFAIP2,FCER1G
Blood	24hrs	Ly6c+.Mon	6.75893e-07	2.87806	0.00230412	ChemicalGeneticPerturbations	SCHLOSSER_SERUM_RESPONSE_DN	243	25	CALM1,RTN4,MYCBP2,RIOK3,PDCD10,SMC5,ATAD2B,ACTR2,YTHDC1,SIRPA,PAFAH1B1,CREBBP,CLASP2,TOP2B,ZEB2,PTPRC,H2AFZ,MEF2A,RB1CC1,LYZ,CLIP1,SMARCA5,SFPQ,PPP1R12A,ATP8A1
Blood	24hrs	Ly6c+.Mon	5.26955e-07	3.40113	0.00245192	GObp	GO_POSITIVE_REGULATION_OF_KINASE_ACTIVITY	243	20	CCND3,CALM1,NRG3,PDCD10,PIM1,PTK2B,VAV3,RASSF2,RAD50,CXCR4,ZEB2,LYN,PRKAG2,SPAG9,PTPRC,LMO4,SYK,AMBRA1,MAPKAPK2,DUSP6
Blood	24hrs	Ly6c+.Mon	7.40494e-07	15.1791	0.00252434	ChemicalGeneticPerturbations	BOYAULT_LIVER_CANCER_SUBCLASS_G5_DN	243	5	EMP3,PELI1,SIRPA,CYBA,CELF2
Blood	24hrs	Ly6c+.Mon	7.75968e-07	2.2538	0.00264528	ChemicalGeneticPerturbations	DIAZ_CHRONIC_MEYLOGENOUS_LEUKEMIA_UP	243	38	CALM1,RTN4,CDK8,YWHAZ,PDCD10,PIM1,EMP3,LY6E,VAV3,UBE2K,EIF4G2,ACTR2,YTHDC1,PDCD4,MBNL2,POLR2E,CSNK2A1,RAD50,MAP4K4,ZEB2,LYN,WRN,PTPRC,CGGBP1,UBE2D2,GSR,MAPRE2,CCNI,PTPN12,LMO4,IFITM2,IFITM1,NDUFB5,ATP7A,EIF3A,SMARCA5,ITGA4,PPP1R12A
Blood	24hrs	Ly6c+.Mon	5.76259e-07	2.41917	0.00268133	GObp	GO_POSITIVE_REGULATION_OF_CELLULAR_COMPONENT_ORGANIZATION	243	34	YWHAZ,GPX1,ARPC4,YWHAE,PTK2B,SMC5,IL1RAPL1,ACTR2,B2M,PAFAH1B1,RAD50,PTEN,NPHS1,CLASP2,ZEB2,NIPBL,LYN,CYBA,ARF6,PLCB1,ARPC2,HIP1,DDHD1,MACF1,SETX,SYK,ROCK1,FN1,CLIP1,AMBRA1,FCER1G,SFPQ,CNOT6L,ATP8A1
Blood	24hrs	Ly6c+.Mon	8.51074e-07	5.04414	0.00290131	ChemicalGeneticPerturbations	STARK_PREFRONTAL_CORTEX_22Q11_DELETION_UP	243	12	MYCBP2,ACIN1,SLC8A1,PTK2B,WNK1,FNDC3A,ZEB2,MAPRE2,CCNI,ROCK1,SMARCA5,ATP8A1
Blood	24hrs	Ly6c+.Mon	8.93437e-07	4.11207	0.00304573	ChemicalGeneticPerturbations	WALLACE_PROSTATE_CANCER_RACE_UP	243	15	ALOX5AP,ARHGAP15,CXCR4,PTPRC,UCP2,CD52,IFITM2,IFITM1,IFITM3,PLAC8,CELF2,LYZ,STK17B,ITGA4,FCER1G
Blood	24hrs	Ly6c+.Mon	8.64194e-07	2.99721	0.0040211	GObp	GO_REGULATION_OF_CELL_ADHESION	243	23	CASK,SIRPG,UTRN,PTK2B,VAV3,PAG1,RARA,PELI1,PTEN,LGALS3,CLASP2,LYN,PTPRC,ARPC2,MACF1,CYLD,CEBPB,SYK,ROCK1,FN1,ITGA4,PPP1R12A,RC3H1
Blood	24hrs	Ly6c+.Mon	8.64706e-07	4.67357	0.00402348	GObp	GO_TELENCEPHALON_DEVELOPMENT	243	13	RTN4,NRG3,KDM6B,SLC8A1,YWHAE,UQCRQ,RARA,PAFAH1B1,PTEN,CXCR4,ZEB2,PLCB1,GNG12
Blood	24hrs	Ly6c+.Mon	9.17162e-07	2.10801	0.00426756	GObp	GO_REGULATION_OF_MULTICELLULAR_ORGANISMAL_DEVELOPMENT	243	43	RUNX1,RTN4,XDH,PRKCH,DDX17,NRG3,FOS,PDCD10,ACIN1,SLC8A1,SMURF2,GPX1,PTK2B,RASSF2,IL1RAPL1,AGGF1,RARA,B2M,PAFAH1B1,PTEN,CXCR4,LGALS3,CLASP2,ZEB2,NIPBL,LYN,ARF6,PLCB1,SPAG9,UNC5D,TYROBP,MACF1,CYLD,CEBPB,SETX,SYK,ROCK1,FN1,TSC22D3,BMP2K,PPP1R12A,RC3H1,DUSP6
Blood	24hrs	Ly6c+.Mon	9.17428e-07	3.89162	0.00426879	GObp	GO_REGULATION_OF_CELLULAR_COMPONENT_SIZE	243	16	RTN4,ARPC4,PTK2B,VAV3,ACTR2,PAFAH1B1,TMSB4Y,PTEN,NPHS1,CLASP2,ARF6,ARPC2,SH3BGRL3,MACF1,FN1,RB1CC1
Blood	24hrs	Ly6c+.Mon	1.2639e-06	4.00491	0.00430865	ChemicalGeneticPerturbations	LI_INDUCED_T_TO_NATURAL_KILLER_UP	243	15	LRRK1,JUNB,LGALS3,ARF6,FTL,SH3BGRL3,CD52,TYROBP,IFITM2,IFITM1,IFITM3,FCER1G,AHNAK,DENND4A,DUSP6
Blood	24hrs	Ly6c+.Mon	9.55165e-07	4.99293	0.00444438	GObp	GO_REGULATION_OF_STRESS_ACTIVATED_PROTEIN_KINASE_SIGNALING_CASCADE	243	12	XDH,PDCD10,PTK2B,RASSF2,PDCD4,PAFAH1B1,MAP4K4,ZEB2,LYN,PLCB1,SPAG9,SYK
Blood	24hrs	Ly6c+.Mon	1.31711e-06	3.79039	0.00449004	ChemicalGeneticPerturbations	GOLDRATH_ANTIGEN_RESPONSE	243	16	DOCK5,HBA2,PIM1,EMP3,ITM2B,ALCAM,LGALS3,LYN,CYBA,H2AFZ,MAPRE2,TYROBP,IFITM3,CST3,ITGA4,AHNAK
Blood	24hrs	Ly6c+.Mon	9.71688e-07	2.05948	0.00452126	GObp	GO_POSITIVE_REGULATION_OF_MOLECULAR_FUNCTION	243	45	CCND3,DOCK5,CALM1,XDH,PRKCH,NRG3,ARHGAP24,PDCD10,PIM1,ALOX5AP,BAZ1B,HERC2,PTK2B,VAV3,RASSF2,WNK1,ARHGAP15,RARA,STIM2,B2M,RAD50,PTEN,CXCR4,ZEB2,FGD4,LYN,PRKAG2,DOCK11,PLCB1,WRN,SPAG9,PTPRC,SH3BGRL3,HIP1,LMO4,SYK,ARHGAP31,FN1,ATP7A,AMBRA1,MAPKAPK2,DNAJC2,DENND4A,PPP1R12A,DUSP6
Blood	24hrs	Ly6c+.Mon	2.48344e-05	5.91516	0.0046192	Kegg	KEGG_FC_GAMMA_R_MEDIATED_PHAGOCYTOSIS	243	7	ARPC4,VAV3,LYN,ARF6,PTPRC,ARPC2,SYK
Blood	24hrs	Ly6c+.Mon	1.4183e-06	3.44722	0.004835	ChemicalGeneticPerturbations	GRYDER_PAX3FOXO1_ENHANCERS_KO_DOWN	243	18	RUNX1,CASK,YWHAZ,ASCC3,WNK1,SGMS1,RIMKLB,MAP4K4,ARPC2,PKN2,PTPN12,LMO4,CEBPZ,CELF2,GNG12,SENP2,QKI,DUSP6
Blood	24hrs	Ly6c+.Mon	1.44055e-06	13.6612	0.00491082	ChemicalGeneticPerturbations	KIM_LRRC3B_TARGETS	243	5	EEF1A1,B2M,IFITM2,TAPBP,LYZ
Blood	24hrs	Ly6c+.Mon	1.50735e-06	3.58211	0.00513856	ChemicalGeneticPerturbations	HSIAO_HOUSEKEEPING_GENES	243	17	YWHAZ,JUND,PIM1,GPX1,EIF3F,EIF4G2,EEF1A1,B2M,JUNB,LGALS3,FTL,ARPC2,H2AFZ,CCNI,IFITM1,CST3,NCL
Blood	24hrs	Ly6c+.Mon	1.5317e-06	10.4639	0.00522156	ChemicalGeneticPerturbations	JIANG_AGING_HYPOTHALAMUS_UP	243	6	HBA2,HBA1,ITPR1,B2M,PAFAH1B1,NDUFB5
Blood	24hrs	Ly6c+.Mon	1.59073e-06	4.43989	0.0054228	ChemicalGeneticPerturbations	UDAYAKUMAR_MED1_TARGETS_DN	243	13	RIOK3,PIM1,RARA,JUNB,PTEN,SPAG9,ST3GAL4,RB1CC1,TNFAIP2,MAPKAPK2,TSC22D3,PPP1R12A,GRK5
Blood	24hrs	Ly6c+.Mon	1.60174e-06	3.7364	0.00546033	ChemicalGeneticPerturbations	SCHUETZ_BREAST_CANCER_DUCTAL_INVASIVE_UP	243	16	HSD17B11,EMP3,RASSF2,MAP4K4,ZEB2,LYN,FTL,PTPRC,TYROBP,VCAN,CELF2,FN1,PDE10A,QKI,FCER1G,GRK5
Blood	24hrs	Ly6c+.Mon	1.24465e-06	1.98308	0.00579138	GObp	GO_IMMUNE_SYSTEM_PROCESS	243	48	CCND3,RUNX1,SIRPB1,SIRPG,ACIN1,KDM6B,ARPC4,PTK2B,VAV3,BIRC3,PAG1,ACTR2,LRRK1,MARCH1,SIRPA,B2M,JUNB,PAFAH1B1,PTEN,ALCAM,CXCR4,IRF2,LGALS3,CREBBP,LYN,CYBA,PTPRC,ARPC2,UBE2D2,TYROBP,LMO4,IFITM2,IFITM1,IFITM3,CYLD,TAPBP,ZC3HAV1,CEBPB,PDE4B,SYK,LNPEP,ROCK1,FN1,ATP7A,MAPKAPK2,ITGA4,FCER1G,RC3H1
Blood	24hrs	Ly6c+.Mon	1.26008e-06	2.85517	0.00586317	GObp	GO_ENZYME_LINKED_RECEPTOR_PROTEIN_SIGNALING_PATHWAY	243	24	NRG3,FOS,SMURF2,ARPC4,PTK2B,VAV3,RASSF2,PAG1,ZFYVE9,ACTR2,POLR2E,USP15,PTEN,CLASP2,LYN,CYBA,PLCB1,ARPC2,SETX,SYK,LNPEP,HNRNPM,ROCK1,MAPKAPK2
Blood	24hrs	Ly6c+.Mon	1.32651e-06	2.65044	0.00617227	GObp	GO_CELL_MOTILITY	243	27	RTN4,NRG3,SIRPG,PDCD10,GPX1,YWHAE,PTK2B,VAV3,PARP9,SIRPA,RERE,PAFAH1B1,PTEN,CXCR4,LGALS3,TOP2B,ZEB2,LYN,PTPRC,PKN2,VCAN,PDE4B,SYK,ROCK1,FN1,ITGA4,FCER1G
Blood	24hrs	Ly6c+.Mon	1.32651e-06	2.65044	0.00617227	GObp	GO_LOCALIZATION_OF_CELL	243	27	RTN4,NRG3,SIRPG,PDCD10,GPX1,YWHAE,PTK2B,VAV3,PARP9,SIRPA,RERE,PAFAH1B1,PTEN,CXCR4,LGALS3,TOP2B,ZEB2,LYN,PTPRC,PKN2,VCAN,PDE4B,SYK,ROCK1,FN1,ITGA4,FCER1G
Blood	24hrs	Ly6c+.Mon	1.99899e-06	3.86638	0.00681456	ChemicalGeneticPerturbations	DAZARD_RESPONSE_TO_UV_NHEK_DN	243	15	TLK2,BAZ1B,SMC5,FNDC3A,USP6,PAFAH1B1,BAZ2B,CREBBP,NIPBL,VPS13A,CHD9,QKI,CEP170,PPP1R12A,CEP350
Blood	24hrs	Ly6c+.Mon	2.06052e-06	3.36084	0.00702433	ChemicalGeneticPerturbations	MITSIADES_RESPONSE_TO_APLIDIN_UP	243	18	RUNX1,RIOK3,JUND,KDM6B,ALOX5AP,SIK3,ATAD2B,TMSB4Y,CXCR4,ARF6,IFITM1,IFITM3,CEBPB,STK17B,TSC22D3,SFPQ,DENND4A,DUSP6
Blood	24hrs	Ly6c+.Mon	1.52386e-06	3.29953	0.00709053	GObp	GO_REGULATION_OF_ANATOMICAL_STRUCTURE_SIZE	243	19	DOCK5,RTN4,SLC8A1,GPX1,ARPC4,PTK2B,VAV3,ACTR2,PAFAH1B1,TMSB4Y,PTEN,NPHS1,CLASP2,ARF6,ARPC2,SH3BGRL3,MACF1,FN1,RB1CC1
Blood	24hrs	Ly6c+.Mon	2.08323e-06	3.50111	0.00710172	ChemicalGeneticPerturbations	TARTE_PLASMA_CELL_VS_PLASMABLAST_UP	243	17	RUNX1,MYO5A,FOS,JUND,ALOX5AP,BIRC3,SIRPA,B2M,CYBA,FTL,IFITM1,LYZ,CST3,TNFAIP2,MAPKAPK2,TSC22D3,FCER1G
Blood	24hrs	Ly6c+.Mon	1.59856e-06	6.35953	0.00743812	GObp	GO_REGULATION_OF_CALCIUM_ION_TRANSMEMBRANE_TRANSPORT	243	9	CALM1,MYO5A,SLC8A1,PTK2B,STIM2,LYN,CYBA,PDE4B,AHNAK
Blood	24hrs	Ly6c+.Mon	2.23479e-06	5.50116	0.00761841	ChemicalGeneticPerturbations	HUANG_GATA2_TARGETS_UP	243	10	ALOX5AP,EMP3,GPX1,B2M,FAM107B,SH3BGRL3,TYROBP,IFITM1,PLAC8,CST3
Blood	24hrs	Ly6c+.Mon	1.84009e-06	2.45656	0.00856196	GObp	GO_CELL_DEATH	243	30	RTN4,XDH,PDCD10,ACIN1,PIM1,EMP3,GPX1,YWHAE,PTK2B,UBE2K,BIRC3,EIF4G2,CCAR1,ITPR1,PDCD4,SGMS1,CSNK2A1,PTEN,CXCR4,ARF6,UNC5D,HIP1,PKN2,CYLD,CEBPB,ROCK1,MEF2A,STK17B,DRAM2,GRK5
Blood	24hrs	Ly6c+.Mon	1.85427e-06	4.70625	0.0086279	GObp	GO_REGULATION_OF_CALCIUM_ION_TRANSPORT	243	12	CALM1,MYO5A,CASK,SLC8A1,PTK2B,STIM2,CXCR4,LGALS3,LYN,CYBA,PDE4B,AHNAK
Blood	24hrs	Ly6c+.Mon	3.99128e-05	10.2459	0.00866108	Biocarta	BIOCARTA_RHO_PATHWAY	243	4	ARPC4,ACTR2,ARPC2,ROCK1
Blood	24hrs	Ly6c+.Mon	1.90795e-06	3.25131	0.0088777	GObp	GO_RESPONSE_TO_INORGANIC_SUBSTANCE	243	19	CALM1,HBA2,FOS,JUND,PDCD10,KDM6B,ALOX5AP,SLC8A1,HBA1,GPX1,PTK2B,B2M,JUNB,PTEN,UCP2,SETX,MEF2A,FN1,ATP7A
Blood	24hrs	Ly6c+.Mon	2.62327e-06	17.2563	0.00894274	ChemicalGeneticPerturbations	SYED_ESTRADIOL_RESPONSE	243	4	MYO5A,CASK,UCP2,CLIP1
Blood	24hrs	Ly6c+.Mon	2.90094e-06	2.72467	0.00988929	ChemicalGeneticPerturbations	RODRIGUES_THYROID_CARCINOMA_ANAPLASTIC_UP	243	24	RUNX1,YWHAZ,PRPF4B,ASCC3,OGFRL1,BIRC3,EIF4G2,ACTR2,MBNL2,LCORL,RAD50,USP15,NIPBL,HPS3,PLCB1,PTPN12,CEBPZ,VCAN,LNPEP,GNG12,FN1,HECTD1,STK17B,AHNAK
Blood	24hrs	Ly6c+.Mon	2.91145e-06	2.25294	0.00992514	ChemicalGeneticPerturbations	BLALOCK_ALZHEIMERS_DISEASE_DN	243	34	CALM1,RTN4,YWHAZ,ALOX5AP,HERC2,ITM2B,YWHAE,PTK2B,UQCRQ,ACTR2,ITPR1,USP6,B2M,CSNK2A1,PAFAH1B1,USP15,CRNKL1,PTEN,CLASP2,PLCB1,ARPC2,LMO4,PDE4B,MEF2A,FN1,RB1CC1,NDUFB5,CLIP1,ZC3H15,FCER1G,SFPQ,DENND4A,PPP1R12A,DUSP6
Blood	24hrs	Ly6c+.Mon	2.44561e-06	3.80653	0.0113794	GObp	GO_IMMUNE_RESPONSE_REGULATING_CELL_SURFACE_RECEPTOR_SIGNALING_PATHWAY	243	15	CALM1,FOS,ARPC4,VAV3,PAG1,ACTR2,PTEN,CREBBP,LYN,PTPRC,ARPC2,UBE2D2,PDE4B,SYK,FCER1G
Blood	24hrs	Ly6c+.Mon	2.64805e-06	3.7831	0.0123214	GObp	GO_REGULATION_OF_METAL_ION_TRANSPORT	243	15	CALM1,MYO5A,CASK,SLC8A1,UTRN,YWHAE,PTK2B,STIM2,B2M,CXCR4,LGALS3,LYN,CYBA,PDE4B,AHNAK
Blood	24hrs	Ly6c+.Mon	2.6638e-06	2.2962	0.0123947	GObp	GO_REGULATION_OF_ORGANELLE_ORGANIZATION	243	33	TLK2,NSD1,MYO5A,YWHAZ,GPX1,ARPC4,YWHAE,PTK2B,SMC5,ATAD2B,BIRC3,ACTR2,CSNK2A1,PAFAH1B1,RAD50,TMSB4Y,PTEN,NPHS1,CLASP2,ZEB2,NIPBL,ARF6,PLCB1,ARPC2,SH3BGRL3,DDHD1,CYLD,ROCK1,CLIP1,AMBRA1,SFPQ,CNOT6L,VPS13C
Blood	24hrs	Ly6c+.Mon	2.89487e-06	5.35733	0.0134699	GObp	GO_PALLIUM_DEVELOPMENT	243	10	RTN4,KDM6B,YWHAE,UQCRQ,RARA,PAFAH1B1,PTEN,ZEB2,PLCB1,GNG12
Blood	24hrs	Ly6c+.Mon	2.96971e-06	7.85987	0.0138181	GObp	GO_HIPPOCAMPUS_DEVELOPMENT	243	7	KDM6B,YWHAE,UQCRQ,RARA,PAFAH1B1,PTEN,ZEB2
Blood	24hrs	Ly6c+.Mon	4.13356e-06	3.33359	0.0140913	ChemicalGeneticPerturbations	MULLIGHAN_MLL_SIGNATURE_2_UP	243	17	CCND3,SIRPB1,ARPC4,PTK2B,RASSF2,ACTR2,SIRPA,CXCR4,CLASP2,NIPBL,CYBA,ARPC2,HIP1,SYK,LNPEP,TNFAIP2,MAPKAPK2
Blood	24hrs	Ly6c+.Mon	3.03051e-06	2.10588	0.014101	GObp	GO_POSITIVE_REGULATION_OF_CATALYTIC_ACTIVITY	243	39	CCND3,DOCK5,CALM1,XDH,NRG3,ARHGAP24,PDCD10,PIM1,ALOX5AP,HERC2,PTK2B,VAV3,RASSF2,ARHGAP15,RAD50,PTEN,CXCR4,ZEB2,FGD4,LYN,PRKAG2,DOCK11,PLCB1,WRN,SPAG9,PTPRC,SH3BGRL3,HIP1,LMO4,SYK,ARHGAP31,FN1,ATP7A,AMBRA1,MAPKAPK2,DNAJC2,DENND4A,PPP1R12A,DUSP6
Blood	24hrs	Ly6c+.Mon	3.12709e-06	1.95464	0.0145503	GObp	GO_POSITIVE_REGULATION_OF_RESPONSE_TO_STIMULUS	243	46	CALM1,XDH,PRKCH,DDX17,YWHAZ,PDCD10,SMURF2,GPX1,ARPC4,YWHAE,PTK2B,VAV3,RASSF2,UBE2K,BIRC3,PAG1,ACTR2,LRRK1,RARA,PELI1,B2M,CSNK2A1,PAFAH1B1,PTEN,CXCR4,CREBBP,ZEB2,LYN,CYBA,PLCB1,SPAG9,PTPRC,ARPC2,UBE2D2,MACF1,CYLD,ZC3HAV1,PDE4B,SYK,FN1,AMBRA1,MAPKAPK2,FCER1G,SFPQ,RC3H1,DUSP6
Blood	24hrs	Ly6c+.Mon	4.42878e-06	4.06708	0.0150977	ChemicalGeneticPerturbations	LU_AGING_BRAIN_UP	243	13	SMC5,RASSF2,WNK1,TSC22D4,BAZ2B,ZEB2,NIPBL,HEPH,VCAN,GNG12,QKI,AHNAK,CEP170
Blood	24hrs	Ly6c+.Mon	8.13576e-05	6.94637	0.0151325	Kegg	KEGG_PATHOGENIC_ESCHERICHIA_COLI_INFECTION	243	5	YWHAZ,ARPC4,ARPC2,ROCK1,NCL
Blood	24hrs	Ly6c+.Mon	3.43524e-06	3.12726	0.0159842	GObp	GO_TRANSMEMBRANE_RECEPTOR_PROTEIN_TYROSINE_KINASE_SIGNALING_PATHWAY	243	19	NRG3,ARPC4,PTK2B,VAV3,RASSF2,PAG1,ACTR2,POLR2E,PTEN,CLASP2,LYN,CYBA,PLCB1,ARPC2,SETX,SYK,HNRNPM,ROCK1,MAPKAPK2
Blood	24hrs	Ly6c+.Mon	5.14511e-06	8.7822	0.0175397	ChemicalGeneticPerturbations	BROWNE_HCMV_INFECTION_10HR_DN	243	6	RUNX1,FRY,EEF1A1,B2M,NIPBL,SETX
Blood	24hrs	Ly6c+.Mon	8.22075e-05	8.86132	0.017839	Biocarta	BIOCARTA_BCR_PATHWAY	243	4	CALM1,FOS,LYN,SYK
Blood	24hrs	Ly6c+.Mon	0.000100952	4.86246	0.018777	Kegg	KEGG_LEUKOCYTE_TRANSENDOTHELIAL_MIGRATION	243	7	PTK2B,VAV3,CTNNA3,CXCR4,CYBA,ROCK1,ITGA4
Blood	24hrs	Ly6c+.Mon	4.13706e-06	2.49787	0.0192497	GObp	GO_RESPONSE_TO_BIOTIC_STIMULUS	243	27	FOS,JUND,ACIN1,GPX1,RARA,PELI1,B2M,JUNB,CRNKL1,CXCR4,LYN,PTPRC,IFITM2,IFITM1,IFITM3,PLAC8,ZC3HAV1,CEBPB,PDE4B,SYK,HNRNPM,GNG12,FN1,LYZ,MAPKAPK2,FCER1G,NCL
Blood	24hrs	Ly6c+.Mon	2.88122e-05	10.929	0.0194194	Reactome	REACTOME_MAPK_TARGETS_NUCLEAR_EVENTS_MEDIATED_BY_MAP_KINASES	243	4	FOS,MEF2A,MAPKAPK2,DUSP6
Blood	24hrs	Ly6c+.Mon	5.75084e-06	4.57685	0.0196046	ChemicalGeneticPerturbations	MCBRYAN_PUBERTAL_BREAST_6_7WK_UP	243	11	RUNX1,HSD17B11,PTK2B,WNK1,SIRPA,CSNK2A1,PTEN,ZEB2,QKI,RASSF3,ATP8A1
Blood	24hrs	Ly6c+.Mon	0.000396035	3.98452	0.0198018	Hallmark	HALLMARK_UV_RESPONSE_DN	243	7	RUNX1,AGGF1,YTHDC1,PTEN,NIPBL,CELF2,GRK5
Blood	24hrs	Ly6c+.Mon	4.3215e-06	2.02938	0.0201079	GObp	GO_REGULATION_OF_INTRACELLULAR_SIGNAL_TRANSDUCTION	243	41	CALM1,XDH,MYO5A,ARHGAP24,PDCD10,GPX1,PTK2B,VAV3,RASSF2,BIRC3,ARHGAP15,LRRK1,ITPR1,PELI1,PDCD4,CSNK2A1,PAFAH1B1,RAD50,PTEN,MAP4K4,CXCR4,CREBBP,ZEB2,FGD4,LYN,ARF6,PRKAG2,PLCB1,WRN,SPAG9,CYLD,ZC3HAV1,SYK,ARHGAP31,FN1,SENP2,PDE10A,MAPKAPK2,SFPQ,RC3H1,DUSP6
Blood	24hrs	Ly6c+.Mon	6.36701e-06	2.54557	0.0217051	ChemicalGeneticPerturbations	RODRIGUES_THYROID_CARCINOMA_POORLY_DIFFERENTIATED_DN	243	25	DOCK5,NSD1,JUND,NEDD9,SIK3,YTHDC1,ITPR1,PELI1,PDCD4,FBXL17,RERE,MOB3B,PTEN,ZEB2,FGD4,PRKAG2,CHD9,CYLD,GOLGB1,CLIP1,HECTD1,QKI,CST3,VPS13C,ATP8A1
Blood	24hrs	Ly6c+.Mon	6.52729e-06	3.93201	0.0222515	ChemicalGeneticPerturbations	TORCHIA_TARGETS_OF_EWSR1_FLI1_FUSION_UP	243	13	RUNX1,PRKCH,EMP3,FRY,STIM2,PHF21A,BAZ2B,MGAT5,MACROD2,DOCK11,GDA,TSC22D3,GRK5
Blood	24hrs	Ly6c+.Mon	4.78632e-06	6.36639	0.0222707	GObp	GO_REGULATION_OF_CALCIUM_ION_IMPORT	243	8	CALM1,MYO5A,CASK,SLC8A1,PTK2B,LGALS3,LYN,CYBA
Blood	24hrs	Ly6c+.Mon	3.4013e-05	10.5764	0.0229248	Reactome	REACTOME_GPVI_MEDIATED_ACTIVATION_CASCADE	243	4	VAV3,LYN,SYK,FCER1G
Blood	24hrs	Ly6c+.Mon	7.16552e-06	6.9972	0.0244273	ChemicalGeneticPerturbations	BILD_CTNNB1_ONCOGENIC_SIGNATURE	243	7	LATS2,YTHDC1,CHD9,VCAN,GNG12,LRBA,QKI
Blood	24hrs	Ly6c+.Mon	7.18776e-06	5.38471	0.0245031	ChemicalGeneticPerturbations	MCBRYAN_PUBERTAL_BREAST_5_6WK_DN	243	9	RUNX1,HSD17B11,WNK1,SIRPA,CSNK2A1,PTEN,ZEB2,QKI,ATP8A1
Blood	24hrs	Ly6c+.Mon	7.27039e-06	3.67802	0.0247848	ChemicalGeneticPerturbations	GENTILE_UV_HIGH_DOSE_DN	243	14	RUNX1,TLK2,CDK8,DDX17,JUND,PDCD10,SMURF2,PAFAH1B1,STRN3,ARF6,PDE4B,LRBA,QKI,TSC22D3
Blood	24hrs	Ly6c+.Mon	5.76583e-06	14.9031	0.0268284	GObp	GO_RESPONSE_TO_INTERFERON_BETA	243	4	UBE2K,IFITM2,IFITM1,IFITM3
Blood	24hrs	Ly6c+.Mon	7.88739e-06	2.32588	0.0268881	ChemicalGeneticPerturbations	MARSON_BOUND_BY_FOXP3_STIMULATED	243	29	CCND3,XDH,NEDD9,PIM1,ITM2B,BIRC3,AGGF1,LCORL,JUNB,MAP4K4,IRF2,SPAG9,PTPRC,FAM107B,GSR,H2AFZ,MAPRE2,UCP2,CCNI,CEBPZ,CYLD,ZC3HAV1,LNPEP,CLIP1,DNAJC2,DRAM2,DENND4A,CNOT6L,DUSP6
Blood	24hrs	Ly6c+.Mon	5.84726e-06	4.23968	0.0272073	GObp	GO_REGULATION_OF_LEUKOCYTE_DIFFERENTIATION	243	12	RUNX1,FOS,ACIN1,RASSF2,RARA,LGALS3,LYN,TYROBP,CYLD,CEBPB,SYK,RC3H1
Blood	24hrs	Ly6c+.Mon	5.85757e-06	2.02638	0.0272553	GObp	GO_REGULATION_OF_PHOSPHORUS_METABOLIC_PROCESS	243	40	CCND3,CALM1,NSD1,XDH,NRG3,PDCD10,PIM1,LATS2,YWHAE,PTK2B,VAV3,RASSF2,UBE2K,WNK1,LRRK1,PDCD4,PAFAH1B1,RAD50,PTEN,MAP4K4,CXCR4,ZEB2,LYN,PRKAG2,PLCB1,SPAG9,PTPRC,LMO4,SYK,ROCK1,FN1,RB1CC1,SENP2,ATP7A,AMBRA1,MAPKAPK2,ANKLE2,PPP1R12A,TMEM132D,DUSP6
Blood	24hrs	Ly6c+.Mon	4.11854e-05	3.52547	0.0277589	Reactome	REACTOME_INNATE_IMMUNE_SYSTEM	243	12	FOS,UBE2K,BIRC3,PELI1,IRF2,LGALS3,CREBBP,UBE2D2,CYLD,MEF2A,MAPKAPK2,DUSP6
Blood	24hrs	Ly6c+.Mon	6.30576e-06	5.46448	0.0293407	GObp	GO_POSITIVE_REGULATION_OF_STRESS_ACTIVATED_PROTEIN_KINASE_SIGNALING_CASCADE	243	9	XDH,PDCD10,PTK2B,RASSF2,ZEB2,LYN,PLCB1,SPAG9,SYK
Blood	24hrs	Ly6c+.Mon	6.32112e-06	2.04263	0.0294122	GObp	GO_CELLULAR_RESPONSE_TO_STRESS	243	39	TLK2,FOS,PDCD10,ACIN1,KDM6B,SLC8A1,BAZ1B,HERC2,GPX1,PTK2B,VAV3,SMC5,ASCC3,PARP9,UBE2K,ITPR1,POLR2E,RAD50,CRNKL1,PTEN,NPHS1,CREBBP,NIPBL,LYN,MACROD2,WRN,SPAG9,UBE2D2,UCP2,CEBPB,SETX,SYK,RB1CC1,ATP7A,SMARCA5,AMBRA1,MAPKAPK2,SFPQ,CNOT6L
Blood	24hrs	Ly6c+.Mon	6.48693e-06	2.11528	0.0301837	GObp	GO_POSITIVE_REGULATION_OF_MULTICELLULAR_ORGANISMAL_PROCESS	243	36	RUNX1,PRKCH,FOS,JUND,ACIN1,SLC8A1,SMURF2,PTK2B,IL1RAPL1,AGGF1,RARA,PELI1,POLR2E,B2M,PAFAH1B1,CXCR4,LGALS3,CREBBP,CLASP2,ZEB2,NIPBL,LYN,CYBA,PLCB1,SPAG9,MACF1,IFITM1,ZC3HAV1,CEBPB,PDE4B,SETX,SYK,FN1,MAPKAPK2,FCER1G,NCL
Blood	24hrs	Ly6c+.Mon	6.555e-06	6.12839	0.0305004	GObp	GO_REGULATION_OF_SEQUESTERING_OF_CALCIUM_ION	243	8	CALM1,MYO5A,SLC8A1,PTK2B,ITPR1,LYN,CYBA,PTPRC
Blood	24hrs	Ly6c+.Mon	9.02438e-06	3.43438	0.0307641	ChemicalGeneticPerturbations	GRUETZMANN_PANCREATIC_CANCER_UP	243	15	HBA2,YWHAZ,EMP3,GPX1,WNK1,BIRC3,CXCR4,PTPRC,PTPN12,LMO4,IFITM2,VCAN,CELF2,FN1,DUSP6
Blood	24hrs	Ly6c+.Mon	9.12258e-06	13.6612	0.0310989	ChemicalGeneticPerturbations	GOLUB_ALL_VS_AML_DN	243	4	LGALS3,LYN,LYZ,CST3
Blood	24hrs	Ly6c+.Mon	9.2761e-06	5.23195	0.0316222	ChemicalGeneticPerturbations	LINDGREN_BLADDER_CANCER_CLUSTER_2A_DN	243	9	MYO5A,RIMKLB,ALCAM,IFITM1,SETX,CELF2,LYZ,TSC22D3,BMP2K
Blood	24hrs	Ly6c+.Mon	7.07579e-06	6.07165	0.0329237	GObp	GO_REGULATION_OF_MYELOID_LEUKOCYTE_DIFFERENTIATION	243	8	RUNX1,FOS,ACIN1,RASSF2,RARA,LYN,TYROBP,CEBPB
Blood	24hrs	Ly6c+.Mon	7.16552e-06	6.9972	0.0333412	GObp	GO_INTEGRIN_MEDIATED_SIGNALING_PATHWAY	243	7	NEDD9,PTK2B,VAV3,TYROBP,SYK,ITGA4,FCER1G
Blood	24hrs	Ly6c+.Mon	7.25641e-06	2.79434	0.0337641	GObp	GO_POSITIVE_REGULATION_OF_TRANSFERASE_ACTIVITY	243	21	CCND3,CALM1,NRG3,PDCD10,PIM1,PTK2B,VAV3,RASSF2,RAD50,PTEN,CXCR4,ZEB2,LYN,PRKAG2,SPAG9,PTPRC,LMO4,SYK,AMBRA1,MAPKAPK2,DUSP6
Blood	24hrs	Ly6c+.Mon	7.30378e-06	3.49292	0.0339845	GObp	GO_RESPONSE_TO_OXIDATIVE_STRESS	243	15	HBA2,FOS,PDCD10,KDM6B,SLC8A1,HBA1,GPX1,PTK2B,CYBA,WRN,GSR,UCP2,SETX,FN1,ATP7A
Blood	24hrs	Ly6c+.Mon	7.6316e-06	6.01594	0.0355099	GObp	GO_RESPONSE_TO_HYDROGEN_PEROXIDE	243	8	HBA2,PDCD10,KDM6B,SLC8A1,HBA1,GPX1,PTK2B,SETX
Blood	24hrs	Ly6c+.Mon	1.09875e-05	3.55276	0.0374565	ChemicalGeneticPerturbations	GRESHOCK_CANCER_COPY_NUMBER_UP	243	14	CCND3,RUNX1,NSD1,PIM1,BIRC3,RARA,USP6,PTEN,CREBBP,WRN,HIP1,CYLD,SYK,SFPQ
Blood	24hrs	Ly6c+.Mon	1.10065e-05	4.29352	0.037521	ChemicalGeneticPerturbations	WANG_TUMOR_INVASIVENESS_DN	243	11	XDH,YWHAZ,ITM2B,LY6E,ACTR2,B2M,CCNI,CELF2,NUFIP2,SFPQ,PPP1R12A
Blood	24hrs	Ly6c+.Mon	8.18059e-06	2.94958	0.0380643	GObp	GO_RESPONSE_TO_BACTERIUM	243	19	FOS,JUND,GPX1,RARA,PELI1,B2M,JUNB,LYN,PLAC8,CEBPB,PDE4B,SYK,HNRNPM,GNG12,FN1,LYZ,MAPKAPK2,FCER1G,NCL
Blood	24hrs	Ly6c+.Mon	0.000211749	5.8548	0.0393853	Kegg	KEGG_LONG_TERM_POTENTIATION	243	5	CALM1,ITPR1,CREBBP,PLCB1,PPP1R12A
Blood	24hrs	Ly6c+.Mon	1.17101e-05	4.63092	0.0399198	ChemicalGeneticPerturbations	HAHTOLA_MYCOSIS_FUNGOIDES_SKIN_UP	243	10	CALM1,CASK,YWHAZ,JUND,ITPR1,PDCD4,MAP4K4,CD52,EIF3A,TSC22D3
Blood	24hrs	Ly6c+.Mon	0.00080822	3.27869	0.040411	Hallmark	HALLMARK_IL2_STAT5_SIGNALING	243	8	CCND3,PRKCH,PIM1,ALCAM,IFITM3,ST3GAL4,MAPKAPK2,AHNAK
Blood	24hrs	Ly6c+.Mon	8.71463e-06	3.444	0.0405492	GObp	GO_FOREBRAIN_DEVELOPMENT	243	15	RTN4,NRG3,KDM6B,SLC8A1,YWHAE,UQCRQ,RARA,PAFAH1B1,PTEN,CXCR4,TOP2B,ZEB2,PLCB1,GNG12,ATP7A
Blood	24hrs	Ly6c+.Mon	9.00712e-06	2.44398	0.0419101	GObp	GO_NEGATIVE_REGULATION_OF_CELL_DEATH	243	26	PRKCH,YWHAZ,PDCD10,PIM1,GPX1,YWHAE,PTK2B,BIRC3,RARA,PDCD4,CSNK2A1,PTEN,MAP4K4,LGALS3,UCP2,PLAC8,CEBPB,SETX,ROCK1,FN1,RB1CC1,AMBRA1,TSC22D3,FCER1G,NCL,GRK5
Blood	24hrs	Ly6c+.Mon	6.31021e-05	2.81432	0.0425308	Reactome	REACTOME_HEMOSTASIS	243	16	DOCK5,CALM1,PRKCH,YWHAZ,SIRPG,SLC8A1,VAV3,SIRPA,IRF2,CREBBP,LYN,SYK,GNG12,FN1,PDE10A,FCER1G
Blood	24hrs	Ly6c+.Mon	1.26861e-05	7.68443	0.0432469	ChemicalGeneticPerturbations	BYSTROEM_CORRELATED_WITH_IL5_DN	243	6	PIM1,BAZ1B,RARA,WRN,SYK,MAPKAPK2
Blood	24hrs	Ly6c+.Mon	1.29537e-05	9.53107	0.0441591	ChemicalGeneticPerturbations	LIU_TARGETS_OF_VMYB_VS_CMYB_DN	243	5	ARHGAP24,FAM107B,VCAN,MAPKAPK2,TSC22D3
Blood	24hrs	Ly6c+.Mon	1.3004e-05	3.69991	0.0443307	ChemicalGeneticPerturbations	POOLA_INVASIVE_BREAST_CANCER_UP	243	13	RASSF2,ARHGAP15,CXCR4,PTPRC,CD52,CYLD,PLAC8,VCAN,FN1,LYZ,STK17B,ITGA4,FCER1G
Blood	24hrs	Ly6c+.Mon	1.31955e-05	6.44686	0.0449836	ChemicalGeneticPerturbations	DELASERNA_MYOD_TARGETS_UP	243	7	CCND3,RUNX1,HIP1,MEF2A,STK17B,ANKS1B,FCER1G
Blood	24hrs	Ly6c+.Mon	9.75057e-06	9.996	0.0453694	GObp	GO_REGULATION_OF_ANTIGEN_RECEPTOR_MEDIATED_SIGNALING_PATHWAY	243	5	PRKCH,LGALS3,LYN,PTPRC,RC3H1
Blood	24hrs	Ly6c+.Mon	9.99346e-06	4.3348	0.0464996	GObp	GO_REGULATION_OF_CATION_TRANSMEMBRANE_TRANSPORT	243	11	CALM1,MYO5A,SLC8A1,UTRN,YWHAE,PTK2B,STIM2,LYN,CYBA,PDE4B,AHNAK
Blood	24hrs	Ly6c+.Mon	1.01209e-05	2.53507	0.0470925	GObp	GO_REGULATION_OF_KINASE_ACTIVITY	243	24	CCND3,CALM1,NRG3,PDCD10,PIM1,LATS2,PTK2B,VAV3,RASSF2,WNK1,PDCD4,RAD50,PTEN,CXCR4,ZEB2,LYN,PRKAG2,SPAG9,PTPRC,LMO4,SYK,AMBRA1,MAPKAPK2,DUSP6
Blood	24hrs	Ly6c+.Mon	1.38398e-05	12.6103	0.0471798	ChemicalGeneticPerturbations	DEN_INTERACT_WITH_LCA5	243	4	YWHAZ,YWHAE,CSNK2A1,NCL
Blood	24hrs	Ly6c+.Mon	1.02069e-05	3.57489	0.0474929	GObp	GO_RESPONSE_TO_MOLECULE_OF_BACTERIAL_ORIGIN	243	14	FOS,JUND,RARA,PELI1,B2M,JUNB,LYN,CEBPB,PDE4B,HNRNPM,GNG12,FN1,MAPKAPK2,NCL
Blood	24hrs	Ly6c+.Mon	1.02632e-05	2.29445	0.0477548	GObp	GO_POSITIVE_REGULATION_OF_PHOSPHATE_METABOLIC_PROCESS	243	29	CCND3,CALM1,XDH,NRG3,PDCD10,PIM1,PTK2B,VAV3,RASSF2,UBE2K,LRRK1,RAD50,PTEN,CXCR4,ZEB2,LYN,PRKAG2,PLCB1,SPAG9,PTPRC,LMO4,SYK,RB1CC1,SENP2,AMBRA1,MAPKAPK2,ANKLE2,PPP1R12A,DUSP6
Blood	24hrs	Ly6c+.Mon	1.02632e-05	2.29445	0.0477548	GObp	GO_POSITIVE_REGULATION_OF_PHOSPHORUS_METABOLIC_PROCESS	243	29	CCND3,CALM1,XDH,NRG3,PDCD10,PIM1,PTK2B,VAV3,RASSF2,UBE2K,LRRK1,RAD50,PTEN,CXCR4,ZEB2,LYN,PRKAG2,PLCB1,SPAG9,PTPRC,LMO4,SYK,RB1CC1,SENP2,AMBRA1,MAPKAPK2,ANKLE2,PPP1R12A,DUSP6
Blood	24hrs	MEGK	7.39711e-16	31.6092	2.52168e-12	ChemicalGeneticPerturbations	GNATENKO_PLATELET_SIGNATURE	145	11	F13A1,ITGA2B,ACTB,PPBP,TLN1,CLU,NRGN,CFL1,FLNA,YWHAH,TUBA4A
Blood	24hrs	MEGK	4.74535e-15	7.10374	3.19836e-12	Reactome	REACTOME_HEMOSTASIS	145	24	F13A1,ITGA2B,ARRB1,THBS1,PPBP,TLN1,CLU,CFL1,MAPK14,GNG11,KIF2A,PRKAR2B,KLC1,ANGPT1,ITGB3,ITGB1,CD9,TUBA4A,P2RY12,PLEK,RAP1B,GATA2,PDE10A,NFE2
Blood	24hrs	MEGK	2.78858e-15	35.3669	1.29753e-11	GObp	GO_PLATELET_AGGREGATION	145	10	ACTG1,FERMT3,ITGA2B,ACTB,MYH9,TLN1,FLNA,ITGB3,P2RY12,PLEK
Blood	24hrs	MEGK	6.25045e-15	14.5702	2.90834e-11	GObp	GO_PLATELET_ACTIVATION	145	15	ACTG1,FERMT3,ITGA2B,ARRB1,ACTB,MYH9,TLN1,FLNA,ITGB3,TREML1,DGKZ,CD9,P2RY12,PLEK,CLEC1B
Blood	24hrs	MEGK	9.96063e-15	8.87016	4.63468e-11	GObp	GO_HEMOSTASIS	145	20	ACTG1,FERMT3,F13A1,ITGA2B,ARRB1,ACTB,CAPZB,MYH9,TLN1,PRKAR2B,FLNA,ITGB3,TREML1,DGKZ,CD9,P2RY12,PLEK,CLEC1B,GATA2,NFE2
Blood	24hrs	MEGK	1.83875e-13	10.6101	1.23931e-10	Reactome	REACTOME_PLATELET_ACTIVATION_SIGNALING_AND_AGGREGATION	145	16	F13A1,ITGA2B,ARRB1,THBS1,PPBP,TLN1,CLU,CFL1,MAPK14,GNG11,ITGB3,CD9,TUBA4A,P2RY12,PLEK,RAP1B
Blood	24hrs	MEGK	7.35891e-14	27.0453	3.4241e-10	GObp	GO_HOMOTYPIC_CELL_CELL_ADHESION	145	10	ACTG1,FERMT3,ITGA2B,ACTB,MYH9,TLN1,FLNA,ITGB3,P2RY12,PLEK
Blood	24hrs	MEGK	1.95753e-12	17.0477	1.31937e-09	Reactome	REACTOME_RESPONSE_TO_ELEVATED_PLATELET_CYTOSOLIC_CA2_	145	11	F13A1,ITGA2B,THBS1,PPBP,TLN1,CLU,CFL1,ITGB3,CD9,TUBA4A,PLEK
Blood	24hrs	MEGK	3.39133e-13	5.87983	1.57799e-09	GObp	GO_RESPONSE_TO_WOUNDING	145	24	ACTG1,ABHD2,FERMT3,F13A1,ITGA2B,ARRB1,ACTB,CAPZB,MYH9,TLN1,CLU,FGFR1OP2,MAPK14,PRKAR2B,FLNA,ITGB3,TREML1,DGKZ,CD9,P2RY12,PLEK,CLEC1B,GATA2,NFE2
Blood	24hrs	MEGK	4.12687e-13	5.82807	1.92023e-09	GObp	GO_CELL_ACTIVATION	145	24	ACTG1,CD79B,FERMT3,ITGA2B,ARRB1,ACTB,PPBP,MYH9,TLN1,CLU,MS4A1,TREML2,FLNA,TOLLIP,ITGB3,TREML1,DGKZ,ITGB1,CD9,P2RY12,PLEK,CLEC1B,UNC13D,GATA2
Blood	24hrs	MEGK	4.48849e-13	6.45635	2.08849e-09	GObp	GO_WOUND_HEALING	145	22	ACTG1,FERMT3,F13A1,ITGA2B,ARRB1,ACTB,CAPZB,MYH9,TLN1,FGFR1OP2,MAPK14,PRKAR2B,FLNA,ITGB3,TREML1,DGKZ,CD9,P2RY12,PLEK,CLEC1B,GATA2,NFE2
Blood	24hrs	MEGK	1.93021e-11	9.60714	3.59019e-09	Kegg	KEGG_FOCAL_ADHESION	145	14	ACTG1,VASP,ITGA2B,ROCK2,THBS1,ACTB,GSK3B,TLN1,FLNA,ITGB3,ZYX,ITGB1,RAP1B,ITGA6
Blood	24hrs	MEGK	2.05647e-12	5.997	9.56873e-09	GObp	GO_REGULATION_OF_BODY_FLUID_LEVELS	145	22	ACTG1,FERMT3,F13A1,ITGA2B,ARRB1,THBS1,ACTB,CAPZB,MYH9,TLN1,PRKAR2B,FLNA,ITGB3,ALOX12,TREML1,DGKZ,CD9,P2RY12,PLEK,CLEC1B,GATA2,NFE2
Blood	24hrs	MEGK	2.97391e-12	19.7044	1.0138e-08	ChemicalGeneticPerturbations	RAGHAVACHARI_PLATELET_SPECIFIC_GENES	145	10	F13A1,ITGA2B,THBS1,PPBP,NRGN,GNG11,KIF2A,PRKAR2B,ITGB3,TUBA4A
Blood	24hrs	MEGK	3.58939e-12	9.71345	1.22362e-08	ChemicalGeneticPerturbations	WIERENGA_STAT5A_TARGETS_DN	145	15	FERMT3,ROCK2,TLN1,RBPMS2,TPM4,GNG11,DAAM1,ANGPT1,ZYX,ALOX12,TREML1,CD9,CD84,RGS18,PLEK
Blood	24hrs	MEGK	1.8294e-11	14.1798	8.5122e-08	GObp	GO_PLATELET_DEGRANULATION	145	11	F13A1,ITGA2B,THBS1,PPBP,TLN1,CLU,FLNA,ITGB3,CD9,TUBA4A,PLEK
Blood	24hrs	MEGK	4.9824e-11	3.56238	2.31831e-07	GObp	GO_VESICLE_MEDIATED_TRANSPORT	145	32	ACTG1,RAB2A,F13A1,CSNK1E,HBA2,HBA1,ITGA2B,ARRB1,BCL2L1,THBS1,ACTB,PPBP,MYH9,TLN1,CLU,RAB10,SNX9,KIF2A,IGKC,FLNA,KLC1,ITGB3,MYO7A,ITGB1,CD9,TUBA4A,PLEK,SPTBN1,UNC13D,GATA2,VPS37B,RAB8B
Blood	24hrs	MEGK	1.05487e-10	3.4618	4.90833e-07	GObp	GO_MOVEMENT_OF_CELL_OR_SUBCELLULAR_COMPONENT	145	32	ACTG1,VASP,CD44,ROBO2,THBS1,CALD1,ACTB,PPBP,CAPZB,MYH9,GSK3B,TLN1,BICD2,TPM4,SDCBP,MAPK14,KIF2A,PLEKHO1,FLNA,KLC1,ANGPT1,ITGB3,MYO7A,ALOX12,DGKZ,ITGB1,CD9,CD84,P2RY12,SPTBN1,GATA2,ITGA6
Blood	24hrs	MEGK	1.68572e-10	11.7616	7.84365e-07	GObp	GO_CELL_JUNCTION_ASSEMBLY	145	11	ACTG1,VASP,ACTB,ARHGAP6,TLN1,MPP5,FLNA,ITGB3,ITGB1,CD9,ITGA6
Blood	24hrs	MEGK	6.93383e-10	5.51724	3.22631e-06	GObp	GO_ACTIN_FILAMENT_BASED_PROCESS	145	18	ACTG1,VASP,ARRB1,ROCK2,RAP2A,CAPZB,ARHGAP6,MYH9,TLN1,TPM4,CFL1,SDCBP,DAAM1,FLNA,ZYX,MYO7A,ITGB1,PLEK
Blood	24hrs	MEGK	1.12264e-09	16.7189	3.82707e-06	ChemicalGeneticPerturbations	TENEDINI_MEGAKARYOCYTE_MARKERS	145	8	ITGA2B,PPBP,TAL1,MAPK14,ITGB3,CD9,GATA2,NFE2
Blood	24hrs	MEGK	9.48398e-10	8.94688	4.4129e-06	GObp	GO_CELL_JUNCTION_ORGANIZATION	145	12	ACTG1,VASP,ACTB,ARHGAP6,TLN1,MPP5,FLNA,ITGB3,ITGB1,CD9,RAB8B,ITGA6
Blood	24hrs	MEGK	9.71752e-10	8.00493	4.52156e-06	GObp	GO_REGULATED_EXOCYTOSIS	145	13	F13A1,ITGA2B,THBS1,PPBP,TLN1,CLU,FLNA,ITGB3,CD9,TUBA4A,PLEK,UNC13D,GATA2
Blood	24hrs	MEGK	6.33029e-09	6.92318	2.158e-05	ChemicalGeneticPerturbations	QI_PLASMACYTOMA_UP	145	13	VASP,ARRB1,PPBP,TLN1,CLU,GNG11,PLEKHO1,ITGB3,ZYX,IRGM,ITGB1,PLEK,ITGA6
Blood	24hrs	MEGK	1.88918e-07	11.359	3.51388e-05	Kegg	KEGG_HYPERTROPHIC_CARDIOMYOPATHY_HCM	145	7	ACTG1,ITGA2B,ACTB,TPM4,ITGB3,ITGB1,ITGA6
Blood	24hrs	MEGK	5.29415e-08	36.7816	3.56826e-05	Reactome	REACTOME_P130CAS_LINKAGE_TO_MAPK_SIGNALING_FOR_INTEGRINS	145	4	ITGA2B,TLN1,ITGB3,RAP1B
Blood	24hrs	MEGK	5.29415e-08	36.7816	3.56826e-05	Reactome	REACTOME_GRB2_SOS_PROVIDES_LINKAGE_TO_MAPK_SIGNALING_FOR_INTERGRINS_	145	4	ITGA2B,TLN1,ITGB3,RAP1B
Blood	24hrs	MEGK	7.94627e-09	6.22914	3.6974e-05	GObp	GO_EXOCYTOSIS	145	14	F13A1,ITGA2B,THBS1,PPBP,TLN1,CLU,FLNA,ITGB3,CD9,TUBA4A,PLEK,UNC13D,GATA2,RAB8B
Blood	24hrs	MEGK	8.05737e-09	13.4567	3.74909e-05	GObp	GO_INTEGRIN_MEDIATED_SIGNALING_PATHWAY	145	8	FERMT3,ITGA2B,MYH9,ITGB3,ZYX,ITGB1,PLEK,ITGA6
Blood	24hrs	MEGK	3.50143e-07	10.4948	6.51266e-05	Kegg	KEGG_DILATED_CARDIOMYOPATHY	145	7	ACTG1,ITGA2B,ACTB,TPM4,ITGB3,ITGB1,ITGA6
Blood	24hrs	MEGK	2.04196e-06	6.2069	0.000102098	Hallmark	HALLMARK_APICAL_JUNCTION	145	9	ACTG1,VASP,ACTB,MYH9,MPP5,MAPK14,ZYX,YWHAH,ITGB1
Blood	24hrs	MEGK	3.643e-08	4.56192	0.00012419	ChemicalGeneticPerturbations	SCHAEFFER_PROSTATE_DEVELOPMENT_6HR_DN	145	17	TJP2,BCL2L1,CALD1,HIST1H1C,FGFR1OP2,CLIC4,GSR,CFL1,KIF2A,CHD9,NUDT3,ITGB1,SPTBN1,TLK1,NUCKS1,GATA2,ITGA6
Blood	24hrs	MEGK	3.03468e-07	6.04479	0.000204538	Reactome	REACTOME_AXON_GUIDANCE	145	11	VASP,ITGA2B,ROBO2,ROCK2,MYH9,TLN1,CFL1,SDCBP,ITGB3,ITGB1,SPTBN1
Blood	24hrs	MEGK	1.31056e-06	10.8893	0.000243764	Kegg	KEGG_ARRHYTHMOGENIC_RIGHT_VENTRICULAR_CARDIOMYOPATHY_ARVC	145	6	ACTG1,ITGA2B,ACTB,ITGB3,ITGB1,ITGA6
Blood	24hrs	MEGK	8.29973e-08	22.2469	0.000282938	ChemicalGeneticPerturbations	DORSEY_GAB2_TARGETS	145	5	CD44,ITGA2B,THBS1,GNG11,ITGB3
Blood	24hrs	MEGK	8.70281e-08	7.6205	0.000296679	ChemicalGeneticPerturbations	JISON_SICKLE_CELL_DISEASE_UP	145	10	F13A1,ITGA2B,HLA-DQB1,CLIC4,GNG11,ITGB3,YWHAH,CD9,PLEK,NFE2
Blood	24hrs	MEGK	2.34889e-06	8.18235	0.000436893	Kegg	KEGG_LEUKOCYTE_TRANSENDOTHELIAL_MIGRATION	145	7	ACTG1,VASP,ROCK2,ACTB,MAPK14,ITGB1,RAP1B
Blood	24hrs	MEGK	2.58729e-06	9.85222	0.000481235	Kegg	KEGG_ECM_RECEPTOR_INTERACTION	145	6	CD44,ITGA2B,THBS1,ITGB3,ITGB1,ITGA6
Blood	24hrs	MEGK	1.35921e-07	3.37165	0.000632442	GObp	GO_CELLULAR_COMPONENT_MORPHOGENESIS	145	22	ACTG1,VASP,FERMT3,ROBO2,BCL2L1,MYH9,GSK3B,TAL1,CLU,RAB10,CLIC4,MPP5,MAPK14,PLEKHO1,FLNA,ITGB3,MYO7A,ITGB1,CD9,CLEC1B,SPTBN1,RAB8B
Blood	24hrs	MEGK	3.5399e-06	9.40439	0.000658421	Kegg	KEGG_HEMATOPOIETIC_CELL_LINEAGE	145	6	CD44,ITGA2B,MS4A1,ITGB3,CD9,ITGA6
Blood	24hrs	MEGK	2.13593e-07	4.27693	0.000728138	ChemicalGeneticPerturbations	ZWANG_CLASS_1_TRANSIENTLY_INDUCED_BY_EGF	145	16	ABHD2,REEP3,BCL2L1,TMEM40,ANKRD12,THBS1,CALD1,EEF1A1,MAPK6,ARHGAP6,TPM4,PGM2L1,DAAM1,TOLLIP,RNF19B,RAB8B
Blood	24hrs	MEGK	4.06495e-06	5.74713	0.000756081	Kegg	KEGG_REGULATION_OF_ACTIN_CYTOSKELETON	145	9	ACTG1,ITGA2B,ROCK2,ACTB,MYH9,CFL1,ITGB3,ITGB1,ITGA6
Blood	24hrs	MEGK	4.29878e-06	11.6891	0.000799573	Kegg	KEGG_PATHOGENIC_ESCHERICHIA_COLI_INFECTION	145	5	ACTG1,ROCK2,ACTB,ITGB1,TUBA4A
Blood	24hrs	MEGK	1.76121e-07	4.33575	0.000819493	GObp	GO_ENDOCYTOSIS	145	16	ACTG1,CSNK1E,HBA2,HBA1,ARRB1,BCL2L1,THBS1,ACTB,MYH9,SNX9,IGKC,MYO7A,ITGB1,CD9,UNC13D,GATA2
Blood	24hrs	MEGK	1.3269e-06	20.4342	0.000894332	Reactome	REACTOME_INTEGRIN_ALPHAIIB_BETA3_SIGNALING	145	4	ITGA2B,TLN1,ITGB3,RAP1B
Blood	24hrs	MEGK	1.70655e-06	10.4758	0.00115021	Reactome	REACTOME_INTEGRIN_CELL_SURFACE_INTERACTIONS	145	6	ITGA2B,THBS1,TLN1,ITGB3,ITGB1,RAP1B
Blood	24hrs	MEGK	3.95346e-07	8.62069	0.00134773	ChemicalGeneticPerturbations	ZHU_CMV_ALL_DN	145	8	ACTG1,ANP32A,THBS1,MYH9,TPM4,MAPK14,FLNA,ANAPC1
Blood	24hrs	MEGK	3.32706e-07	7.56939	0.00154808	GObp	GO_CELL_SUBSTRATE_ADHESION	145	9	FERMT3,CD44,ITGA2B,ARHGAP6,ANGPT1,ITGB3,ZYX,ITGB1,ITGA6
Blood	24hrs	MEGK	5.20288e-07	5.74713	0.00177366	ChemicalGeneticPerturbations	DURCHDEWALD_SKIN_CARCINOGENESIS_DN	145	11	CD44,HBA1,MAPK6,MYH9,GSK3B,SNX9,TPM4,GSR,CPEB4,ITGB1,ITGA6
Blood	24hrs	MEGK	5.02287e-07	2.36374	0.00233714	GObp	GO_IMMUNE_SYSTEM_PROCESS	145	34	ACTG1,CD79B,CD44,GAB2,THBS1,ACTB,HLA-DQB1,HLA-DQB2,PPBP,MYH9,TAL1,CLU,RAB10,MS4A1,TREML2,MAPK14,KIF2A,OTUD7B,IGKC,TOLLIP,KLC1,ANGPT1,ITGB3,RNF19B,IRGM,TREML1,ITGB1,CD84,PLEK,CLEC1B,UNC13D,GATA2,RAB8B,ITGA6
Blood	24hrs	MEGK	5.47762e-07	3.22197	0.00254874	GObp	GO_MEMBRANE_ORGANIZATION	145	21	REEP3,BCL2L1,ROCK2,RAP2A,THBS1,MYH9,GSK3B,CLU,RAB10,YWHAG,SNX9,MPP5,SDCBP,IGKC,FLNA,YWHAH,ITGB1,CD9,SPTBN1,VPS37B,RAB8B
Blood	24hrs	MEGK	5.50434e-07	12.352	0.00256117	GObp	GO_POSITIVE_REGULATION_OF_ENDOTHELIAL_CELL_MIGRATION	145	6	ROCK2,THBS1,MAPK14,ANGPT1,ITGB3,ALOX12
Blood	24hrs	MEGK	7.93987e-07	3.89223	0.0027067	ChemicalGeneticPerturbations	CHICAS_RB1_TARGETS_CONFLUENT	145	16	CD44,TJP2,ARRB1,THBS1,ARHGAP18,ACTB,CAPZB,MYH9,TLN1,CLU,FLNA,ZYX,CD9,SPTBN1,TBCB,ITGA6
Blood	24hrs	MEGK	8.12737e-07	4.10509	0.00277062	ChemicalGeneticPerturbations	PILON_KLF1_TARGETS_UP	145	15	ITGA2B,CALD1,ACTB,PPBP,CLU,MAPK14,GNG11,KIF2A,DAAM1,PRKAR2B,DNAJB4,CPEB4,ALOX12,MBNL1,TLK1
Blood	24hrs	MEGK	8.43826e-07	7.88177	0.0028766	ChemicalGeneticPerturbations	JOHNSTONE_PARVB_TARGETS_2_UP	145	8	ACTG1,BCL2L1,EEF1A1,ACTB,TLN1,CFL1,FLNA,ZYX
Blood	24hrs	MEGK	7.73929e-07	3.39908	0.00360109	GObp	GO_REGULATION_OF_CELLULAR_COMPONENT_MOVEMENT	145	19	ABHD2,FERMT3,ITGA2B,ROCK2,RAP2A,THBS1,ARHGAP18,PPBP,GSK3B,NOS1AP,CLIC4,SDCBP,MAPK14,FLNA,ANGPT1,ITGB3,ALOX12,ITGB1,P2RY12
Blood	24hrs	MEGK	7.95968e-07	2.54453	0.00370364	GObp	GO_INTRACELLULAR_SIGNAL_TRANSDUCTION	145	29	RAB2A,GAB2,TJP2,BCL2L1,ANP32A,ROCK2,RAP2A,ARHGAP18,MAPK6,ARHGAP6,GSK3B,CLU,RAB10,CNOT6,CFL1,SDCBP,MAPK14,PRKAR2B,TOLLIP,ANGPT1,TREML1,DGKZ,P2RY12,TAOK3,PLEK,RAP1B,SPTBN1,TLK1,RAB8B
Blood	24hrs	MEGK	5.87949e-06	15.3257	0.00396277	Reactome	REACTOME_PLATELET_AGGREGATION_PLUG_FORMATION	145	4	ITGA2B,TLN1,ITGB3,RAP1B
Blood	24hrs	MEGK	6.44688e-06	4.17973	0.0043452	Reactome	REACTOME_DEVELOPMENTAL_BIOLOGY	145	12	VASP,ITGA2B,ROBO2,ROCK2,MYH9,TLN1,CFL1,SDCBP,MAPK14,ITGB3,ITGB1,SPTBN1
Blood	24hrs	MEGK	0.000107515	4.82759	0.00537576	Hallmark	HALLMARK_MITOTIC_SPINDLE	145	7	CAPZB,MYH9,FLNA,KLC1,TUBA4A,SPTBN1,TLK1
Blood	24hrs	MEGK	0.000107515	4.82759	0.00537576	Hallmark	HALLMARK_EPITHELIAL_MESENCHYMAL_TRANSITION	145	7	CD44,THBS1,CALD1,TPM4,FLNA,ITGB3,ITGB1
Blood	24hrs	MEGK	9.89831e-06	10.142	0.00667146	Reactome	REACTOME_SEMAPHORIN_INTERACTIONS	145	5	ROCK2,MYH9,TLN1,CFL1,ITGB1
Blood	24hrs	MEGK	1.47367e-06	2.94039	0.00685698	GObp	GO_BIOLOGICAL_ADHESION	145	22	ACTG1,FERMT3,CD44,ITGA2B,ROBO2,CNTN5,THBS1,ACTB,ARHGAP6,MYH9,TLN1,TREML2,FLNA,ANGPT1,ITGB3,ZYX,ITGB1,CD9,CD84,P2RY12,PLEK,ITGA6
Blood	24hrs	MEGK	2.62256e-06	5.40906	0.00894032	ChemicalGeneticPerturbations	DAVICIONI_TARGETS_OF_PAX_FOXO1_FUSIONS_UP	145	10	CSNK1E,CD44,ARRB1,THBS1,MYH9,TPM4,PRKAR2B,CD9,RAP1B,GATA2
Blood	24hrs	MEGK	2.72829e-06	17.7976	0.00930073	ChemicalGeneticPerturbations	SIMBULAN_UV_RESPONSE_IMMORTALIZED_DN	145	4	TACC1,THBS1,CALD1,ITGA6
Blood	24hrs	MEGK	2.5029e-06	8.11359	0.011646	GObp	GO_CELL_MATRIX_ADHESION	145	7	CD44,ITGA2B,ARHGAP6,ITGB3,ZYX,ITGB1,ITGA6
Blood	24hrs	MEGK	2.5881e-06	3.97332	0.0120424	GObp	GO_SECRETION_BY_CELL	145	14	F13A1,ITGA2B,THBS1,PPBP,TLN1,CLU,FLNA,ITGB3,CD9,TUBA4A,PLEK,UNC13D,GATA2,RAB8B
Blood	24hrs	MEGK	3.74695e-06	3.85436	0.0127733	ChemicalGeneticPerturbations	SENESE_HDAC3_TARGETS_UP	145	14	CD44,BCL2L1,GSK3B,BICD2,MAPK14,PGM2L1,IGKC,ITGB3,CPEB4,ITGB1,MBNL1,SPTBN1,RAB8B,ITGA6
Blood	24hrs	MEGK	2.74605e-06	2.75383	0.0127774	GObp	GO_POSITIVE_REGULATION_OF_CELLULAR_COMPONENT_ORGANIZATION	145	23	STOM,VASP,ARRB1,ROBO2,ROCK2,GSK3B,TAL1,CLU,CNOT6,YWHAG,SNX9,SDCBP,MAPK14,FLNA,ANGPT1,YWHAH,ITGB1,PLEK,SPTBN1,UNC13D,GATA2,VPS37B,RAB8B
Blood	24hrs	MEGK	2.77393e-06	3.12731	0.0129071	GObp	GO_CYTOSKELETON_ORGANIZATION	145	19	ACTG1,VASP,ARRB1,TACC1,ROCK2,RAP2A,CAPZB,ARHGAP6,MYH9,TLN1,BICD2,CFL1,SDCBP,KIF2A,DAAM1,FLNA,ZYX,ITGB1,PLEK
Blood	24hrs	MEGK	2.9451e-06	3.23697	0.0137035	GObp	GO_REGULATION_OF_CELLULAR_COMPONENT_BIOGENESIS	145	18	VASP,ROBO2,ROCK2,THBS1,ARHGAP18,CAPZB,ARHGAP6,GSK3B,TAL1,CLU,SENP6,CNOT6,SNX9,SDCBP,PLEK,RAP1B,SPTBN1,VPS37B
Blood	24hrs	MEGK	5.31924e-06	4.25494	0.0181333	ChemicalGeneticPerturbations	HSIAO_HOUSEKEEPING_GENES	145	12	ACTG1,STOM,EEF1A1,ACTB,HLA-DQB1,MYH9,CLU,CFL1,FLNA,YWHAH,ITGB1,SPTBN1
Blood	24hrs	MEGK	4.02783e-06	2.69305	0.0187415	GObp	GO_REGULATION_OF_ORGANELLE_ORGANIZATION	145	23	VASP,ARRB1,BCL2L1,ROCK2,ARHGAP18,CAPZB,ARHGAP6,MYH9,GSK3B,TAL1,SENP6,CNOT6,YWHAG,CLIC4,SDCBP,KIF2A,FLNA,YWHAH,PLEK,SPTBN1,TLK1,GATA2,VPS37B
Blood	24hrs	MEGK	6.03656e-06	3.93224	0.0205786	ChemicalGeneticPerturbations	MARTENS_BOUND_BY_PML_RARA_FUSION	145	13	ABHD2,VASP,FERMT3,PLEKHA2,ARRB1,MYH9,UBE2R2,FGFR1OP2,PLEKHO1,NUDT3,PLEK,SPTBN1,NFE2
Blood	24hrs	MEGK	6.189e-06	3.92364	0.0210983	ChemicalGeneticPerturbations	SENESE_HDAC1_TARGETS_UP	145	13	MYCT1,CD44,REEP3,BCL2L1,LRRC58,LSM12,GSK3B,GSR,CPEB4,ITGB1,MBNL1,RAB8B,ITGA6
Blood	24hrs	MEGK	4.87415e-06	6.37831	0.0226794	GObp	GO_REGULATION_OF_CELL_SUBSTRATE_ADHESION	145	8	PLEKHA2,ROCK2,THBS1,ARHGAP6,GSK3B,FLNA,ITGB1,UNC13D
Blood	24hrs	MEGK	0.000513226	4.9975	0.0256613	Hallmark	HALLMARK_COAGULATION	145	5	THBS1,CLU,ITGB3,CD9,PLEK
Blood	24hrs	MEGK	3.82066e-05	8.01925	0.0257513	Reactome	REACTOME_L1CAM_INTERACTIONS	145	5	ITGA2B,SDCBP,ITGB3,ITGB1,SPTBN1
Blood	24hrs	MEGK	7.69266e-06	6.02977	0.0262243	ChemicalGeneticPerturbations	VERHAAK_AML_WITH_NPM1_MUTATED_UP	145	8	ABHD2,THBS1,PPBP,HIST1H1C,CLU,PRKAR2B,ITGB3,PLEK
Blood	24hrs	MEGK	7.99012e-06	4.09696	0.0272383	ChemicalGeneticPerturbations	OSMAN_BLADDER_CANCER_UP	145	12	VASP,CD44,RAP2A,RAB10,BICD2,FGFR1OP2,TPM4,CHD9,FLNA,NUDT3,MBNL1,NUCKS1
Blood	24hrs	MEGK	8.87755e-06	4.0568	0.0302636	ChemicalGeneticPerturbations	REN_ALVEOLAR_RHABDOMYOSARCOMA_DN	145	12	SMTN,THBS1,CALD1,CAPZB,MYH9,TLN1,CLU,CLIC4,TPM4,ZYX,MBNL1,RAP1B
Blood	24hrs	MEGK	6.50419e-06	3.90654	0.030264	GObp	GO_SINGLE_ORGANISM_CELL_ADHESION	145	13	ACTG1,FERMT3,CD44,ITGA2B,ACTB,MYH9,TLN1,TREML2,FLNA,ITGB3,ITGB1,P2RY12,PLEK
Blood	24hrs	MEGK	0.000188911	7.55786	0.0351375	Kegg	KEGG_VIRAL_MYOCARDITIS	145	4	ACTG1,ACTB,HLA-DQB1,MYH9
Blood	24hrs	MEGK	8.35815e-06	2.45779	0.0388905	GObp	GO_REGULATION_OF_IMMUNE_SYSTEM_PROCESS	145	25	ACTG1,CD79B,STOM,GAB2,ITGA2B,TJP2,FAM13B,THBS1,ACTB,HLA-DQB1,HLA-DQB2,PPBP,TAL1,CLU,TREML2,MAPK14,IGKC,ANGPT1,TREML1,TRAFD1,ITGB1,CD84,P2RY12,UNC13D,GATA2
Blood	24hrs	MEGK	8.38335e-06	2.51546	0.0390077	GObp	GO_CELL_CYCLE	145	24	CSNK1E,REEP3,BCL2L1,TACC1,ROCK2,THBS1,MAPK6,MYH9,GSK3B,CNOT6,YWHAG,SNX9,MAPK14,KIF2A,PRKAR2B,FLNA,ANAPC1,DGKZ,ITGB1,TUBA4A,TAOK3,SPTBN1,TLK1,PARD3B
Blood	24hrs	MEGK	8.97719e-06	3.4029	0.0417709	GObp	GO_CELL_CELL_ADHESION	145	15	ACTG1,FERMT3,CD44,ITGA2B,ROBO2,ACTB,MYH9,TLN1,TREML2,FLNA,ITGB3,ITGB1,CD84,P2RY12,PLEK
Blood	24hrs	MEGK	1.30295e-05	3.91294	0.0444174	ChemicalGeneticPerturbations	THUM_SYSTOLIC_HEART_FAILURE_UP	145	12	ACTG1,F13A1,ANP32A,ANKRD12,THBS1,ACTB,HLA-DQB1,CLIC4,IGKC,DNAJB4,ITGB1,NUCKS1
Blood	24hrs	MEGK	1.33547e-05	5.62984	0.0455263	ChemicalGeneticPerturbations	ZHENG_FOXP3_TARGETS_IN_THYMUS_UP	145	8	REEP3,ANKRD12,SDCBP,CHD9,CD84,MBNL1,RAB8B,ITGA6
Blood	24hrs	MEGK	9.79951e-06	6.75187	0.0455971	GObp	GO_RAS_PROTEIN_SIGNAL_TRANSDUCTION	145	7	ROCK2,RAP2A,ARHGAP6,CFL1,SDCBP,MAPK14,RAP1B
Blood	24hrs	MEGK	6.82964e-05	9.35126	0.0460318	Reactome	REACTOME_LOSS_OF_NLP_FROM_MITOTIC_CENTROSOMES	145	4	CSNK1E,YWHAG,PRKAR2B,TUBA4A
Blood	24hrs	MEGK	1.00932e-05	8.03482	0.0469636	GObp	GO_POSITIVE_REGULATION_OF_EPITHELIAL_CELL_MIGRATION	145	6	ROCK2,THBS1,MAPK14,ANGPT1,ITGB3,ALOX12
Blood	24hrs	MEGK	1.37974e-05	9.57854	0.0470352	ChemicalGeneticPerturbations	HUANG_GATA2_TARGETS_DN	145	5	TACC1,ACTB,CLU,DAAM1,GATA2
Blood	24hrs	MEGK	1.01769e-05	4.31034	0.0473529	GObp	GO_SMALL_GTPASE_MEDIATED_SIGNAL_TRANSDUCTION	145	11	RAB2A,ROCK2,RAP2A,ARHGAP18,ARHGAP6,RAB10,CFL1,SDCBP,MAPK14,RAP1B,RAB8B
Blood	24hrs	MEGK	1.041e-05	5.80762	0.0484379	GObp	GO_PHAGOCYTOSIS	145	8	ACTG1,THBS1,ACTB,MYH9,IGKC,MYO7A,UNC13D,GATA2
Blood	24hrs	MEGK	1.44125e-05	12.8308	0.0491323	ChemicalGeneticPerturbations	GALLUZZI_PERMEABILIZE_MITOCHONDRIA	145	4	BCL2L1,HIST1H1C,GSK3B,CLIC4
Blood	24hrs	NK.Cells	1.221e-20	5.45809	4.16237e-17	ChemicalGeneticPerturbations	DACOSTA_UV_RESPONSE_VIA_ERCC3_DN	178	42	KIAA1109,RUNX1,MYCBP2,RBM6,NFKB1,ARID5B,BAZ1B,GPATCH8,UGCG,KIF11,ZNF292,BPTF,ARAP2,ATP11B,SMC5,ZBTB20,USP6,SUZ12,PHF3,ASCC3,SMCHD1,USP34,STRN3,PHF21A,AKAP9,VPS13A,PKN2,MALT1,KAT6A,ZEB2,ROCK1,MACF1,DMD,RB1CC1,CLINT1,NIPBL,CRIM1,PHF14,FAM172A,TMCC1,CEP350,QKI
Blood	24hrs	NK.Cells	3.21578e-14	5.98114	1.09626e-10	ChemicalGeneticPerturbations	DACOSTA_UV_RESPONSE_VIA_ERCC3_COMMON_DN	178	26	KIAA1109,RUNX1,MYCBP2,RBM6,ARID5B,UGCG,KIF11,ZNF292,BPTF,ATP11B,SMC5,USP6,SUZ12,PHF3,ASCC3,SMCHD1,STRN3,PHF21A,AKAP9,VPS13A,PKN2,KAT6A,NIPBL,CRIM1,CEP350,QKI
Blood	24hrs	NK.Cells	1.87289e-13	7.68935	6.38468e-10	ChemicalGeneticPerturbations	GABRIELY_MIR21_TARGETS	178	20	MYCBP2,ZNF292,UTRN,ACTR2,ATP11B,SMC5,PIK3R1,ZBTB20,SUZ12,PELI1,WNK1,FBXL17,PDCD4,USP34,VPS13A,RFX7,DMD,NIPBL,DOCK10,RSF1
Blood	24hrs	NK.Cells	5.12922e-13	2.87356	1.74855e-09	ChemicalGeneticPerturbations	PILON_KLF1_TARGETS_DN	178	51	CALM1,CHD7,MYCBP2,NFKB1,NEDD9,BAZ1B,GPATCH8,ELMO1,UBE2B,LSM14A,PDE3B,BPTF,NKG7,ACTR2,RERE,ARHGAP15,ATP11B,PIK3R1,MSL2,FOXP1,WNK1,CAB39L,CORO2A,KPNA4,CAPZA2,ATP8B4,ABCB7,CELF2,KAT6A,ZEB2,PYCARD,MYL12B,MFAP1,S100A10,RFX7,CD52,MCL1,UIMC1,ARF6,LGALS1,SETD5,BRD3,CORO1A,DOCK10,FCER1G,FAM172A,TMCC1,ITGA4,ANKRD44,AHNAK,QKI
Blood	24hrs	NK.Cells	6.51933e-10	5.9399	2.22244e-06	ChemicalGeneticPerturbations	DAZARD_RESPONSE_TO_UV_NHEK_DN	178	17	NFKB1,ARID5B,BAZ1B,KIF11,SMC4,LSM14A,BPTF,SMC5,USP6,PHF3,AKAP9,VPS13A,KAT6A,NIPBL,TMCC1,CEP350,QKI
Blood	24hrs	NK.Cells	1.13788e-09	21.021	3.87902e-06	ChemicalGeneticPerturbations	ZHENG_FOXP3_TARGETS_IN_T_LYMPHOCYTE_DN	178	7	RAPGEF6,UTRN,PELI1,FOXP1,WNK1,NIPBL,ANKRD44
Blood	24hrs	NK.Cells	2.91863e-09	7.36961	9.94962e-06	ChemicalGeneticPerturbations	ZHENG_FOXP3_TARGETS_IN_THYMUS_UP	178	13	RAPGEF6,ARID5B,ARHGAP15,SMC5,PIK3R1,ZBTB20,PELI1,WNK1,STRN3,CELF2,MALT1,PPP3CC,DOCK10
Blood	24hrs	NK.Cells	1.83068e-08	2.69687	6.24078e-05	ChemicalGeneticPerturbations	PUJANA_ATM_PCC_NETWORK	178	35	RUNX1,RBM6,NFKB1,BAZ1B,SMC4,IKZF1,LSM14A,B2M,BPTF,ACTR2,ATP11B,SMC5,TMSB4Y,SUZ12,PHF3,EEF1A1,SMCHD1,HNRNPC,USP34,RABEP1,ABCB7,H2AFZ,ROCK1,DNTTIP2,CD52,RB1CC1,CLINT1,ARF6,ARPC2,CORO1A,PPP3CC,DOCK10,ITGA4,LY9,EEF1B2
Blood	24hrs	NK.Cells	2.00341e-08	4.29962	6.82963e-05	ChemicalGeneticPerturbations	ZHENG_BOUND_BY_FOXP3	178	19	CHD7,RAPGEF6,ARID5B,ELMO1,UTRN,ARHGAP15,PIK3R1,ZBTB20,PELI1,FOXP1,PRKCQ,CELF2,MALT1,MACF1,APBB1IP,NIPBL,PPP3CC,DOCK10,ANKRD44
Blood	24hrs	NK.Cells	2.83985e-08	3.08336	0.000132138	GObp	GO_CHROMOSOME_ORGANIZATION	178	28	CHD7,CHD6,ARID5B,BAZ1B,SMC4,UBE2B,IKZF1,BPTF,CHD4,RERE,SMC5,SUZ12,MSL2,ASCC3,SMCHD1,UBA52,HNRNPC,USP34,PHF21A,H2AFZ,KAT6A,UBB,UIMC1,NIPBL,BRD3,RSF1,H3F3B,SETD1B
Blood	24hrs	NK.Cells	6.53615e-08	10.582	0.000222817	ChemicalGeneticPerturbations	DACOSTA_UV_RESPONSE_VIA_ERCC3_TTD_DN	178	8	GPATCH8,ARAP2,MALT1,ZEB2,DMD,RB1CC1,PHF14,TMCC1
Blood	24hrs	NK.Cells	6.95368e-08	8.92857	0.000237051	ChemicalGeneticPerturbations	LAIHO_COLORECTAL_CANCER_SERRATED_UP	178	9	B2M,PELI1,HNRNPC,MYL12B,MACF1,MFAP1,CLINT1,ARPC2,LGALS1
Blood	24hrs	NK.Cells	9.04198e-08	4.57012	0.000308241	ChemicalGeneticPerturbations	HSIAO_HOUSEKEEPING_GENES	178	16	PFN1,B2M,CAPNS1,EEF1A1,UBA52,HNRNPC,EIF4A2,H2AFZ,KAT6A,UBB,S100A10,NDUFA4,ARPC2,LGALS1,H3F3B,EEF1B2
Blood	24hrs	NK.Cells	9.83621e-08	10.101	0.000335316	ChemicalGeneticPerturbations	DACOSTA_UV_RESPONSE_VIA_ERCC3_XPCS_DN	178	8	NFKB1,GPATCH8,ARAP2,MALT1,ZEB2,RB1CC1,PHF14,TMCC1
Blood	24hrs	NK.Cells	9.23757e-08	3.91672	0.000429824	GObp	GO_CHROMATIN_MODIFICATION	178	19	CHD7,CHD6,ARID5B,BAZ1B,UBE2B,IKZF1,BPTF,CHD4,RERE,SUZ12,MSL2,HNRNPC,USP34,PHF21A,KAT6A,UIMC1,BRD3,RSF1,SETD1B
Blood	24hrs	NK.Cells	1.2818e-07	5.06696	0.000436965	ChemicalGeneticPerturbations	LI_INDUCED_T_TO_NATURAL_KILLER_UP	178	14	NFKB1,CCL5,CAPNS1,NKG7,LRRK1,S100A10,SH3BGRL3,CD52,ARF6,LGALS1,PPP3CC,FCER1G,DENND4A,AHNAK
Blood	24hrs	NK.Cells	1.47986e-07	3.8038	0.000504485	ChemicalGeneticPerturbations	FLECHNER_BIOPSY_KIDNEY_TRANSPLANT_OK_VS_DONOR_UP	178	19	KIAA1109,ARID5B,UGCG,ACTR2,RERE,PHF3,HNRNPC,STRN3,VPS13A,PKN2,H2AFZ,ZEB2,ROCK1,CDK14,MCL1,ARF6,LGALS1,H3F3B,QKI
Blood	24hrs	NK.Cells	1.91353e-07	2.96296	0.000652321	ChemicalGeneticPerturbations	GRYDER_PAX3FOXO1_ENHANCERS_IN_TADS	178	26	RUNX1,CHD7,CHD6,UGCG,ELMO1,ARHGAP26,RERE,ARHGAP15,SMC5,FOXP1,ASCC3,WNK1,ATP8B4,CELF2,PKN2,ST3GAL4,ZEB2,ZC3H13,SPATA13,DNTTIP2,CDK14,CLINT1,RIMKLB,ARPC2,DOCK10,QKI
Blood	24hrs	NK.Cells	1.41808e-07	3.51936	0.000659831	GObp	GO_CHROMATIN_ORGANIZATION	178	21	CHD7,CHD6,ARID5B,BAZ1B,UBE2B,IKZF1,BPTF,CHD4,RERE,SUZ12,MSL2,HNRNPC,USP34,PHF21A,H2AFZ,KAT6A,UIMC1,BRD3,RSF1,H3F3B,SETD1B
Blood	24hrs	NK.Cells	2.09588e-07	3.89105	0.000714485	ChemicalGeneticPerturbations	SCHAEFFER_PROSTATE_DEVELOPMENT_6HR_DN	178	18	PFN1,EIF3J,ARID5B,UGCG,CHD4,WNK1,HNRNPC,STRN3,ZEB2,ZC3H13,MACF1,RFX7,CDK14,NDUFA4,CAMK1D,CRIM1,SPPL3,AHNAK
Blood	24hrs	NK.Cells	2.7527e-07	6.11111	0.000938395	ChemicalGeneticPerturbations	LEE_DIFFERENTIATING_T_LYMPHOCYTE	178	11	MYCBP2,IKZF1,ARHGAP15,USP34,PRKCQ,CELF2,SPATA13,APBB1IP,CD52,CORO1A,CEP350
Blood	24hrs	NK.Cells	3.32934e-07	3.61492	0.00113497	ChemicalGeneticPerturbations	HAMAI_APOPTOSIS_VIA_TRAIL_UP	178	19	RAPGEF6,MYCBP2,EIF3J,BAZ1B,KIF11,SMC4,TMF1,SUZ12,PHF3,RABEP1,CELF2,MYL12B,MFAP1,BDP1,RB1CC1,NIPBL,DOCK10,RSF1,CEP350
Blood	24hrs	NK.Cells	3.49892e-07	4.15369	0.00119278	ChemicalGeneticPerturbations	GRYDER_PAX3FOXO1_ENHANCERS_KO_DOWN	178	16	RUNX1,UGCG,ELMO1,ARHGAP26,ASCC3,WNK1,ATP8B4,CELF2,PKN2,ZC3H13,CDK14,CLINT1,RIMKLB,ARPC2,DOCK10,QKI
Blood	24hrs	NK.Cells	4.47467e-07	4.92984	0.00152542	ChemicalGeneticPerturbations	HADDAD_B_LYMPHOCYTE_PROGENITOR	178	13	CALM1,CHD7,RBM6,ARID5B,UGCG,ARAP2,USP34,VPS13A,PKN2,RB1CC1,CRIM1,PPP3CC,TMCC1
Blood	24hrs	NK.Cells	3.7833e-07	5.93312	0.00176037	GObp	GO_FC_RECEPTOR_SIGNALING_PATHWAY	178	11	CALM1,NFKB1,ELMO1,ACTR2,PIK3R1,UBA52,PRKCQ,MALT1,UBB,ARPC2,FCER1G
Blood	24hrs	NK.Cells	9.2355e-06	13.8889	0.0020041	Biocarta	BIOCARTA_RHO_PATHWAY	178	4	PFN1,ACTR2,ROCK1,ARPC2
Blood	24hrs	NK.Cells	6.18044e-07	6.27746	0.00210691	ChemicalGeneticPerturbations	HAHTOLA_MYCOSIS_FUNGOIDES_SKIN_UP	178	10	CALM1,RAPGEF6,PFN1,ZNF292,SUZ12,PDCD4,CAPZA2,CD52,CRIM1,TSC22D3
Blood	24hrs	NK.Cells	6.18714e-07	3.1219	0.0021092	ChemicalGeneticPerturbations	ONKEN_UVEAL_MELANOMA_UP	178	22	CALM1,CHD7,PFN1,MRPS28,BAZ1B,LSM14A,B2M,UBE2K,SMCHD1,PHF21A,AKAP9,CELF2,ZEB2,RALGAPA1,MACF1,SH3BGRL3,RB1CC1,CLINT1,ARPC2,LGALS1,FCER1G,PDE10A
Blood	24hrs	NK.Cells	9.95893e-07	3.03658	0.003395	ChemicalGeneticPerturbations	RODRIGUES_THYROID_CARCINOMA_POORLY_DIFFERENTIATED_DN	178	22	HERC1,NEDD9,UBE2B,LSM14A,TMF1,RERE,ARAP2,ZBTB20,PELI1,FOXP1,FBXL17,PDCD4,USP34,AKAP9,ZCCHC7,ZEB2,SPATA13,UBN2,DMD,RSF1,H3F3B,QKI
Blood	24hrs	NK.Cells	1.14487e-06	2.24593	0.00390286	ChemicalGeneticPerturbations	GRAESSMANN_APOPTOSIS_BY_DOXORUBICIN_DN	178	36	KIAA1109,RUNX1,CHD7,NFKB1,MRPS28,GPATCH8,KIF11,ELMO1,CCL5,ZNF292,EXOC6,UTRN,UBE2K,CHD4,SMC5,PIK3R1,ZBTB20,SUZ12,PHF3,FOXP1,COX17,CAB39L,USP34,PHF21A,EIF4A2,ABCB7,ZEB2,RALGAPA1,ROCK1,NIPBL,ARF6,PPP3CC,SPPL3,NOP58,QKI,PASK
Blood	24hrs	NK.Cells	1.28337e-06	6.53595	0.004375	ChemicalGeneticPerturbations	DAZARD_UV_RESPONSE_CLUSTER_G6	178	9	NFKB1,KIF11,SMC4,LSM14A,SMC5,USP6,PHF3,KAT6A,QKI
Blood	24hrs	NK.Cells	9.48228e-07	4.62963	0.00441211	GObp	GO_REGULATION_OF_ACTIN_FILAMENT_BASED_PROCESS	178	13	PFN1,ACTR2,PIK3R1,TMSB4Y,PRKCQ,CAPZA2,ROCK1,PYCARD,S100A10,SH3BGRL3,ARF6,ARPC2,CORO1A
Blood	24hrs	NK.Cells	1.47257e-06	3.74269	0.00501999	ChemicalGeneticPerturbations	MATSUDA_NATURAL_KILLER_DIFFERENTIATION	178	16	RBM6,NEDD9,KIF11,CCL5,NKG7,CHD4,LRRK1,PHF21A,AKAP9,CRIM1,ARF6,BRD3,CORO1A,PPP3CC,AHNAK,TSC22D3
Blood	24hrs	NK.Cells	1.51525e-06	3.73483	0.00516548	ChemicalGeneticPerturbations	SMID_BREAST_CANCER_NORMAL_LIKE_UP	178	16	SPRY2,AOAH,ELMO1,CCL5,NKG7,ARHGAP15,PIK3R1,PRKCQ,CELF2,CD52,DMD,CORO1A,PPP3CC,DOCK10,ITGA4,LY9
Blood	24hrs	NK.Cells	1.52793e-06	5.20095	0.00520871	ChemicalGeneticPerturbations	RUTELLA_RESPONSE_TO_HGF_DN	178	11	AOAH,NEDD9,RERE,LRRK1,PELI1,CELF2,DNTTIP2,CD52,MCL1,ITGA4,SETD1B
Blood	24hrs	NK.Cells	1.69236e-06	13.5501	0.00576927	ChemicalGeneticPerturbations	KUROKAWA_LIVER_CANCER_CHEMOTHERAPY_DN	178	5	CALM1,SUZ12,PDCD4,S100A10,EEF1B2
Blood	24hrs	NK.Cells	1.77532e-06	5.64016	0.00605205	ChemicalGeneticPerturbations	MCBRYAN_PUBERTAL_BREAST_6_7WK_UP	178	10	RUNX1,CHD4,PIK3R1,ZBTB20,WNK1,AKAP9,ZEB2,CRIM1,CORO1A,QKI
Blood	24hrs	NK.Cells	3.21889e-05	10.8401	0.006985	Biocarta	BIOCARTA_FCER1_PATHWAY	178	4	CALM1,PIK3R1,PPP3CC,FCER1G
Blood	24hrs	NK.Cells	1.53169e-06	6.41026	0.00712694	GObp	GO_REGULATION_OF_ACTIN_FILAMENT_LENGTH	178	9	PFN1,ACTR2,TMSB4Y,CAPZA2,PYCARD,SH3BGRL3,ARF6,ARPC2,CORO1A
Blood	24hrs	NK.Cells	1.81255e-06	2.34381	0.00843378	GObp	GO_NEGATIVE_REGULATION_OF_NITROGEN_COMPOUND_METABOLIC_PROCESS	178	32	NFKB1,ARID5B,CCL5,UBE2B,IKZF1,BPTF,CHD4,RERE,ZBTB20,SUZ12,PELI1,FOXP1,PDCD4,UBA52,HNRNPC,CCAR1,STRN3,PHF21A,EIF4A2,H2AFZ,KAT6A,ZEB2,PYCARD,UBB,UIMC1,NIPBL,PHF14,SFSWAP,RSF1,H3F3B,TSC22D3,QKI
Blood	24hrs	NK.Cells	2.54484e-06	6.06061	0.00867538	ChemicalGeneticPerturbations	PASQUALUCCI_LYMPHOMA_BY_GC_STAGE_DN	178	9	NEDD9,PDE3B,ARHGAP15,CELF2,S100A10,RFX7,BRD3,CORO1A,ANKRD44
Blood	24hrs	NK.Cells	2.26064e-06	12.9199	0.0105187	GObp	GO_NEGATIVE_REGULATION_OF_LEUKOCYTE_APOPTOTIC_PROCESS	178	5	CCL5,FOXP1,PRKCQ,FCER1G,TSC22D3
Blood	24hrs	NK.Cells	3.38688e-06	7.77778	0.0115459	ChemicalGeneticPerturbations	DING_LUNG_CANCER_EXPRESSION_BY_COPY_NUMBER	178	7	CHD7,MRPS28,ATP11B,KPNA4,AKAP9,RB1CC1,NIPBL
Blood	24hrs	NK.Cells	3.93077e-06	7.62527	0.0134	ChemicalGeneticPerturbations	CHAUHAN_RESPONSE_TO_METHOXYESTRADIOL_DN	178	7	B2M,CAPNS1,EEF1A1,H2AFZ,S100A10,MCL1,LGALS1
Blood	24hrs	NK.Cells	4.22949e-06	6.48824	0.0144183	ChemicalGeneticPerturbations	MCBRYAN_PUBERTAL_BREAST_5_6WK_DN	178	8	RUNX1,CHD4,ZBTB20,WNK1,AKAP9,ZEB2,CRIM1,QKI
Blood	24hrs	NK.Cells	3.15167e-06	5.31632	0.0146647	GObp	GO_LYMPHOCYTE_DIFFERENTIATION	178	10	CHD7,IKZF1,B2M,PIK3R1,FOXP1,MALT1,LGALS1,FCER1G,ITGA4,LY9
Blood	24hrs	NK.Cells	4.70775e-06	3.432	0.0160487	ChemicalGeneticPerturbations	MILI_PSEUDOPODIA_HAPTOTAXIS_UP	178	16	CDK12,EIF3J,LSM14A,ACTR2,SMC5,SMCHD1,CAB39L,RABEP1,CAPZA2,VPS13A,ABCB7,CELF2,ROCK1,NIPBL,ARF6,QKI
Blood	24hrs	NK.Cells	3.47221e-06	2.81943	0.0161562	GObp	GO_POSITIVE_REGULATION_OF_IMMUNE_SYSTEM_PROCESS	178	22	RUNX1,NFKB1,ELMO1,CCL5,LSM14A,B2M,UBE2K,ACTR2,PIK3R1,PELI1,UBA52,PRKCQ,MALT1,PYCARD,UBB,CAMK1D,ARPC2,LGALS1,CORO1A,FCER1G,SPPL3,ITGA4
Blood	24hrs	NK.Cells	7.72789e-05	9.07029	0.0167695	Biocarta	BIOCARTA_TCR_PATHWAY	178	4	CALM1,NFKB1,PIK3R1,PPP3CC
Blood	24hrs	NK.Cells	3.83988e-06	16.4609	0.017867	GObp	GO_NEGATIVE_REGULATION_OF_LYMPHOCYTE_APOPTOTIC_PROCESS	178	4	CCL5,FOXP1,PRKCQ,TSC22D3
Blood	24hrs	NK.Cells	5.27367e-06	4.2735	0.017978	ChemicalGeneticPerturbations	GENTILE_UV_HIGH_DOSE_DN	178	12	RUNX1,ARID5B,UGCG,LSM14A,PHF3,STRN3,MFAP1,MCL1,CLINT1,ARF6,TSC22D3,QKI
Blood	24hrs	NK.Cells	5.84343e-06	2.81124	0.0199203	ChemicalGeneticPerturbations	CUI_TCF21_TARGETS_2_DN	178	21	CALM1,NEDD9,ARID5B,ARHGAP26,ARAP2,VPS13A,CELF2,MALT1,ZEB2,ROCK1,GIMAP8,MACF1,NLK,MCL1,CRIM1,CORO1A,ITGA4,H3F3B,AHNAK,QKI,PDE10A
Blood	24hrs	NK.Cells	7.05847e-06	5.40541	0.0240623	ChemicalGeneticPerturbations	ZHANG_TLX_TARGETS_36HR_DN	178	9	KIF11,SMC4,ZNF292,PIK3R1,SUZ12,KPNA4,ROCK1,MACF1,DNTTIP2
Blood	24hrs	NK.Cells	7.05954e-06	10.6838	0.024066	ChemicalGeneticPerturbations	CHNG_MULTIPLE_MYELOMA_HYPERPLOID_UP	178	5	EIF3J,HERC1,UBA52,EIF4A2,EEF1B2
Blood	24hrs	NK.Cells	5.40525e-06	3.75738	0.0251506	GObp	GO_LEUKOCYTE_ACTIVATION	178	14	CHD7,CCL5,IKZF1,B2M,PIK3R1,FOXP1,MALT1,PYCARD,APBB1IP,LGALS1,CORO1A,FCER1G,ITGA4,LY9
Blood	24hrs	NK.Cells	5.67406e-06	6.25978	0.0264014	GObp	GO_FC_EPSILON_RECEPTOR_SIGNALING_PATHWAY	178	8	CALM1,NFKB1,PIK3R1,UBA52,PRKCQ,MALT1,UBB,FCER1G
Blood	24hrs	NK.Cells	6.88018e-06	3.9039	0.0320135	GObp	GO_POSITIVE_REGULATION_OF_CYTOKINE_PRODUCTION	178	13	RUNX1,NFKB1,LSM14A,B2M,TMF1,PIK3R1,ZBTB20,PELI1,PRKCQ,MALT1,PYCARD,FCER1G,LY9
Blood	24hrs	NK.Cells	7.14678e-06	8.43882	0.033254	GObp	GO_REGULATION_OF_LEUKOCYTE_APOPTOTIC_PROCESS	178	6	CCL5,FOXP1,PRKCQ,GIMAP8,FCER1G,TSC22D3
Blood	24hrs	NK.Cells	1.02336e-05	6.70498	0.0348863	ChemicalGeneticPerturbations	IKEDA_MIR30_TARGETS_UP	178	7	CALM1,ELMO1,PELI1,USP34,CELF2,DMD,SPPL3
Blood	24hrs	NK.Cells	7.66187e-06	4.12797	0.0356507	GObp	GO_IMMUNE_RESPONSE_REGULATING_CELL_SURFACE_RECEPTOR_SIGNALING_PATHWAY	178	12	CALM1,NFKB1,ELMO1,ACTR2,PIK3R1,UBA52,PRKCQ,MALT1,UBB,ARPC2,FCER1G,SPPL3
Blood	24hrs	NK.Cells	1.09285e-05	9.92063	0.0372551	ChemicalGeneticPerturbations	BROWNE_HCMV_INFECTION_10HR_DN	178	5	RUNX1,KIF11,B2M,EEF1A1,NIPBL
Blood	24hrs	NK.Cells	1.12048e-05	5.12821	0.0381971	ChemicalGeneticPerturbations	STARK_PREFRONTAL_CORTEX_22Q11_DELETION_UP	178	9	MYCBP2,CHD4,PIK3R1,FOXP1,WNK1,ZEB2,RALGAPA1,ROCK1,RSF1
Blood	24hrs	NK.Cells	8.25733e-06	3.84161	0.0384214	GObp	GO_POSITIVE_REGULATION_OF_CELL_ADHESION	178	13	CCL5,UTRN,PIK3R1,PRKCQ,MALT1,ROCK1,PYCARD,S100A10,APBB1IP,ARPC2,LGALS1,CORO1A,ITGA4
Blood	24hrs	NK.Cells	8.82348e-06	10.2881	0.0410556	GObp	GO_REGULATION_OF_LYMPHOCYTE_APOPTOTIC_PROCESS	178	5	CCL5,FOXP1,PRKCQ,GIMAP8,TSC22D3
Blood	24hrs	NK.Cells	1.3562e-05	7.66284	0.0462328	ChemicalGeneticPerturbations	FLECHNER_BIOPSY_KIDNEY_TRANSPLANT_REJECTED_VS_OK_UP	178	6	AOAH,CCL5,CELF2,CD52,CORO1A,FCER1G
Blood	24hrs	NK.Cells	1.00459e-05	2.23264	0.0467437	GObp	GO_NEGATIVE_REGULATION_OF_GENE_EXPRESSION	178	30	NFKB1,ARID5B,CCL5,UBE2B,IKZF1,TMF1,BPTF,CHD4,RERE,ZBTB20,SUZ12,PELI1,FOXP1,PDCD4,UBA52,STRN3,PHF21A,H2AFZ,KAT6A,ZEB2,PYCARD,UBB,UIMC1,NIPBL,PHF14,SFSWAP,RSF1,H3F3B,TSC22D3,QKI
Blood	24hrs	Treml4+.Mon	8.84004e-24	6.82973	3.01357e-20	ChemicalGeneticPerturbations	DACOSTA_UV_RESPONSE_VIA_ERCC3_DN	133	40	RUNX1,CDK8,NCOA1,PUM2,NCOA2,GSK3B,NR3C1,DUSP5,SGMS1,SPEN,ATAD2B,HERC4,STAG1,PIP4K2A,CDKN1B,STK24,MEF2A,ROCK1,FYN,PTPN12,COG5,CERS6,DUSP1,WRN,ANKRD17,CBLB,LYN,ZEB2,CHD1,PHIP,SLC25A13,ALCAM,SETD2,CLINT1,CEP170,GRK5,MBNL1,PLAUR,ATRX,FAM172A
Blood	24hrs	Treml4+.Mon	2.1328e-19	8.46292	7.27073e-16	ChemicalGeneticPerturbations	DACOSTA_UV_RESPONSE_VIA_ERCC3_COMMON_DN	133	28	RUNX1,CDK8,NCOA1,PUM2,NCOA2,GSK3B,NR3C1,SPEN,ATAD2B,STAG1,PIP4K2A,STK24,MEF2A,FYN,PTPN12,CERS6,DUSP1,WRN,ANKRD17,CBLB,LYN,CHD1,PHIP,SLC25A13,SETD2,CEP170,MBNL1,ATRX
Blood	24hrs	Treml4+.Mon	2.12881e-14	7.00974	9.90537e-11	GObp	GO_RESPONSE_TO_INORGANIC_SUBSTANCE	133	23	KLF4,CALM1,HBA2,JUND,FOS,GPX1,HBA1,SLC8A1,EP300,ABCG2,HSPA5,B2M,GSK3B,CDKN1B,STK24,MEF2A,IL1B,DUSP1,NFE2L2,SLC25A13,MEF2C,ATRX,MAP3K5
Blood	24hrs	Treml4+.Mon	2.4583e-12	3.10922	8.38036e-09	ChemicalGeneticPerturbations	PILON_KLF1_TARGETS_DN	133	42	BACH1,NOP56,CALM1,PLCL2,STK38,ARPP19,ELMO1,LSP1,HSPA5,PUM2,NCOA2,GSK3B,RERE,NR3C1,ARHGAP15,FOXP1,STAG1,PAG1,PIP4K2A,STK24,FYN,IL6R,SLC44A2,CSGALNACT2,PTPN12,HNRNPA3,CERS6,CORO1A,KLF3,FGR,ANKRD17,CYFIP2,ZEB2,MYO7A,CXCR4,MEF2C,NUCKS1,XPR1,FAM172A,MAP3K5,RASSF5,DOCK10
Blood	24hrs	Treml4+.Mon	2.90578e-12	4.34213	9.9058e-09	ChemicalGeneticPerturbations	GRYDER_PAX3FOXO1_ENHANCERS_IN_TADS	133	29	RUNX1,NCOA1,ELMO1,NDUFA6,RERE,NR3C1,SGMS1,ATAD2B,ARHGAP15,FOXP1,ZFAND3,STAG1,STK24,SETBP1,ST3GAL4,FYN,PTPN12,HNRNPA3,DUSP1,NFE2L2,ARPC2,ANKRD17,PID1,ZEB2,CLINT1,UBR3,FAF1,DOCK10,DHX9
Blood	24hrs	Treml4+.Mon	4.04334e-12	10.7005	1.88137e-08	GObp	GO_RESPONSE_TO_REACTIVE_OXYGEN_SPECIES	133	14	KLF4,HBA2,FOS,GPX1,HBA1,SLC8A1,PRDX5,EP300,GSK3B,STK24,IL1B,DUSP1,NFE2L2,MAP3K5
Blood	24hrs	Treml4+.Mon	1.16524e-11	14.7325	5.42185e-08	GObp	GO_RESPONSE_TO_HYDROGEN_PEROXIDE	133	11	KLF4,HBA2,GPX1,HBA1,SLC8A1,EP300,GSK3B,STK24,DUSP1,NFE2L2,MAP3K5
Blood	24hrs	Treml4+.Mon	4.23363e-11	9.08354	1.44325e-07	ChemicalGeneticPerturbations	THEILGAARD_NEUTROPHIL_AT_SKIN_WOUND_DN	133	14	CALM1,STK38,NCOA1,LSP1,GSK3B,RERE,STK24,ROCK1,CORO1A,INPP5D,ATRX,MAP3K5,DHX9,TSC22D3
Blood	24hrs	Treml4+.Mon	4.66823e-11	3.37195	2.17213e-07	GObp	GO_REGULATION_OF_CELL_DEATH	133	34	KLF4,HBA2,JUND,PRKCH,NCOA1,GPX1,HBA1,BCL6,PRDX5,EP300,HSPA5,GSK3B,VAV3,FOXP1,CDKN1B,ROCK1,FYN,IL1B,CORO1A,DUSP1,NFE2L2,WRN,LYN,FGD4,CXCR4,PHIP,MEF2C,LGMN,FAF1,GRK5,PLAUR,INPP5D,MAP3K5,TSC22D3
Blood	24hrs	Treml4+.Mon	6.52511e-11	7.34518	2.22441e-07	ChemicalGeneticPerturbations	DAZARD_RESPONSE_TO_UV_NHEK_DN	133	16	BACH1,PUM2,NCOA2,NR3C1,SPEN,ELF2,FYN,CERS6,NFE2L2,CBLB,SCAF11,CHD1,PHIP,CEP170,ATRX,MAP3K5
Blood	24hrs	Treml4+.Mon	1.57336e-10	5.64913	5.36358e-07	ChemicalGeneticPerturbations	ZHENG_BOUND_BY_FOXP3	133	19	MAK,PRKCH,ELMO1,BCL6,SGMS1,MS4A6A,ARHGAP15,FOXP1,PAG1,PIP4K2A,CDKN1B,STK24,FYN,KLF3,CBLB,MBNL1,MAP3K5,ARHGAP25,DOCK10
Blood	24hrs	Treml4+.Mon	2.54332e-10	3.32967	1.18341e-06	GObp	GO_REGULATION_OF_IMMUNE_SYSTEM_PROCESS	133	32	RUNX1,CALM1,PLCL2,FOS,PRKCH,ELMO1,GPX1,BCL6,EP300,PUM2,B2M,VAV3,FOXP1,PAG1,FYN,IL6R,IL1B,CORO1A,NFE2L2,CLEC4C,FGR,ARPC2,ANKRD17,PLCB1,CYFIP2,LYN,MEF2C,MIA3,LGMN,RC3H1,INPP5D,TSC22D3
Blood	24hrs	Treml4+.Mon	3.15047e-10	6.6357	1.46591e-06	GObp	GO_RESPONSE_TO_OXIDATIVE_STRESS	133	16	KLF4,HBA2,FOS,GPX1,HBA1,SLC8A1,PRDX5,NDUFA6,EP300,GSK3B,STK24,IL1B,DUSP1,NFE2L2,WRN,MAP3K5
Blood	24hrs	Treml4+.Mon	8.55381e-10	8.07579	2.91599e-06	ChemicalGeneticPerturbations	RUTELLA_RESPONSE_TO_HGF_DN	133	13	PLCL2,NCOA1,LRRK1,RERE,MS4A6A,NKTR,FYN,CCNL1,PID1,CXCR4,MEF2C,SETD1B,ATRX
Blood	24hrs	Treml4+.Mon	7.00395e-10	45.6204	3.25894e-06	GObp	GO_CELLULAR_RESPONSE_TO_ANTIBIOTIC	133	5	EP300,HSPA5,CDKN1B,IL1B,MEF2C
Blood	24hrs	Treml4+.Mon	7.77062e-10	4.08351	3.61567e-06	GObp	GO_REGULATION_OF_IMMUNE_RESPONSE	133	24	CALM1,PLCL2,FOS,PRKCH,ELMO1,GPX1,BCL6,EP300,PUM2,B2M,VAV3,PAG1,FYN,IL1B,CLEC4C,FGR,ARPC2,ANKRD17,CYFIP2,LYN,MEF2C,LGMN,RC3H1,INPP5D
Blood	24hrs	Treml4+.Mon	8.51997e-10	3.7805	3.96434e-06	GObp	GO_POSITIVE_REGULATION_OF_TRANSCRIPTION_FROM_RNA_POLYMERASE_II_PROMOTER	133	26	BACH1,KLF4,RUNX1,JUND,FOS,CDK8,NCOA1,EP300,HSPA5,NCOA2,GSK3B,RERE,NR3C1,ATAD2B,STAG1,MEF2A,CCNL1,IL1B,NFE2L2,PID1,ZEB2,PHIP,TRPS1,MEF2C,NUCKS1,ATRX
Blood	24hrs	Treml4+.Mon	9.62782e-10	4.04112	4.47982e-06	GObp	GO_POSITIVE_REGULATION_OF_IMMUNE_SYSTEM_PROCESS	133	24	RUNX1,FOS,PRKCH,ELMO1,BCL6,EP300,PUM2,B2M,VAV3,PAG1,FYN,IL6R,IL1B,CORO1A,CLEC4C,FGR,ARPC2,ANKRD17,CYFIP2,LYN,MEF2C,MIA3,LGMN,INPP5D
Blood	24hrs	Treml4+.Mon	1.30008e-09	2.80013	6.04929e-06	GObp	GO_POSITIVE_REGULATION_OF_RESPONSE_TO_STIMULUS	133	37	CALM1,PRKCH,ELMO1,GPX1,EP300,LRRK1,PUM2,NCOA2,B2M,GSK3B,DUSP5,VAV3,PAG1,PIP4K2A,FYN,IL6R,SLC44A2,IL1B,NFE2L2,CLEC4C,FGR,ARPC2,ANKRD17,PLCB1,CYFIP2,LYN,ZEB2,CXCR4,PHIP,MEF2C,LGMN,FAF1,NUCKS1,RC3H1,PLAUR,INPP5D,MAP3K5
Blood	24hrs	Treml4+.Mon	6.76178e-09	3.96015	2.30509e-05	ChemicalGeneticPerturbations	BUYTAERT_PHOTODYNAMIC_THERAPY_STRESS_UP	133	22	BACH1,KLF4,JUND,FOS,CDK8,ARPP19,NCOA1,EP300,GSK3B,DUSP5,HERC4,MEF2A,CCNL1,IL6R,CSGALNACT2,DUSP1,NFE2L2,KLF3,WRN,CBLB,ZEB2,SETD2
Blood	24hrs	Treml4+.Mon	6.31178e-09	6.32754	2.93687e-05	GObp	GO_IMMUNE_RESPONSE_REGULATING_CELL_SURFACE_RECEPTOR_SIGNALING_PATHWAY	133	14	CALM1,FOS,ELMO1,EP300,VAV3,PAG1,FYN,CLEC4C,FGR,ARPC2,CYFIP2,LYN,MEF2C,INPP5D
Blood	24hrs	Treml4+.Mon	8.73241e-09	2.77136	4.06319e-05	GObp	GO_POSITIVE_REGULATION_OF_MOLECULAR_FUNCTION	133	34	CCND3,KLF4,CALM1,PLCL2,PRKCH,ELMO1,EP300,HSPA5,NCOA2,B2M,GSK3B,DUSP5,VAV3,ARHGAP15,CDKN1B,FYN,CCNL1,IL6R,IL1B,SH3BGRL3,FGR,WRN,PLCB1,CYFIP2,LYN,FGD4,ZEB2,CXCR4,MEF2C,DENND4A,PLAUR,MAP3K5,ARHGAP25,DOCK10
Blood	24hrs	Treml4+.Mon	1.33967e-08	20.8551	4.56693e-05	ChemicalGeneticPerturbations	BILBAN_B_CLL_LPL_DN	133	6	KLF4,FOS,MS4A6A,FYN,CCNL1,DUSP1
Blood	24hrs	Treml4+.Mon	1.06623e-08	2.74986	4.96115e-05	GObp	GO_POSITIVE_REGULATION_OF_BIOSYNTHETIC_PROCESS	133	34	BACH1,KLF4,RUNX1,CALM1,JUND,FOS,CDK8,PRKCH,ARPP19,NCOA1,PRDX5,EP300,HSPA5,NCOA2,GSK3B,RERE,NR3C1,ATAD2B,ELF2,STAG1,MEF2A,CCNL1,IL6R,IL1B,NFE2L2,PLCB1,PID1,ZEB2,CHD1,PHIP,TRPS1,MEF2C,NUCKS1,ATRX
Blood	24hrs	Treml4+.Mon	1.16505e-08	7.26898	5.42095e-05	GObp	GO_RESPONSE_TO_TOXIC_SUBSTANCE	133	12	HBA2,FOS,GPX1,HBA1,PRDX5,EP300,HSPA5,CDKN1B,RSRC1,IL1B,LYN,MEF2C
Blood	24hrs	Treml4+.Mon	1.62224e-08	15.4833	5.53023e-05	ChemicalGeneticPerturbations	TENEDINI_MEGAKARYOCYTE_MARKERS	133	7	CCND3,JUND,FOS,CDKN1B,IL6R,IL1B,CXCR4
Blood	24hrs	Treml4+.Mon	1.21716e-06	6.56934	6.0858e-05	Hallmark	HALLMARK_TNFA_SIGNALING_VIA_NFKB	133	9	KLF4,FOS,BCL6,DUSP5,CCNL1,IL1B,DUSP1,NFE2L2,PLAUR
Blood	24hrs	Treml4+.Mon	1.21716e-06	6.56934	6.0858e-05	Hallmark	HALLMARK_COMPLEMENT	133	9	CALM1,HSPA5,DUSP5,FYN,CBLB,LYN,LGMN,PLAUR,DOCK10
Blood	24hrs	Treml4+.Mon	1.47248e-08	29.1971	6.85143e-05	GObp	GO_CELLULAR_RESPONSE_TO_TOXIC_SUBSTANCE	133	5	EP300,HSPA5,CDKN1B,IL1B,MEF2C
Blood	24hrs	Treml4+.Mon	1.62911e-08	2.82097	7.58026e-05	GObp	GO_REGULATION_OF_INTRACELLULAR_SIGNAL_TRANSDUCTION	133	32	KLF4,CALM1,STK38,GPX1,BCL6,EP300,LRRK1,PUM2,GSK3B,DUSP5,VAV3,ARHGAP15,PIP4K2A,FYN,IL6R,SLC44A2,IL1B,DUSP1,NFE2L2,FGR,WRN,ANKRD17,PLCB1,LYN,FGD4,ZEB2,CXCR4,FAF1,RC3H1,PLAUR,MAP3K5,ARHGAP25
Blood	24hrs	Treml4+.Mon	1.89525e-08	2.93536	8.81858e-05	GObp	GO_REGULATION_OF_CELL_DIFFERENTIATION	133	30	KLF4,RUNX1,JUND,FOS,PRKCH,NCOA1,BCL6,EP300,B2M,GSK3B,SPEN,FOXP1,STK24,MEF2A,ROCK1,FYN,IL6R,IL1B,NFE2L2,ARPC2,ANKRD17,PLCB1,LYN,ZEB2,CXCR4,TRPS1,MEF2C,RC3H1,INPP5D,MAP3K5
Blood	24hrs	Treml4+.Mon	2.7028e-08	2.70495	9.21385e-05	ChemicalGeneticPerturbations	GRAESSMANN_APOPTOSIS_BY_DOXORUBICIN_DN	133	33	NOP56,RUNX1,ELMO1,PUM2,GSK3B,NR3C1,SPEN,VAV3,FOXP1,HERC4,ZFAND3,STAG1,CDKN1B,MEF2A,ROCK1,FYN,SLC44A2,RSRC1,PTPN12,KLF3,ANKRD17,SCAF11,ZEB2,CHD1,PHIP,EXOC4,SLC25A13,TRPS1,XPR1,GRK5,ATRX,MAP3K5,DHX9
Blood	24hrs	Treml4+.Mon	3.19719e-08	6.08273	0.000108992	ChemicalGeneticPerturbations	GENTILE_UV_HIGH_DOSE_DN	133	13	BACH1,RUNX1,JUND,CDK8,PUM2,NR3C1,DUSP5,SPEN,DUSP1,NFE2L2,CHD1,CLINT1,TSC22D3
Blood	24hrs	Treml4+.Mon	5.36505e-07	24.3309	0.000116422	Biocarta	BIOCARTA_NTHI_PATHWAY	133	4	EP300,NR3C1,IL1B,DUSP1
Blood	24hrs	Treml4+.Mon	2.59664e-08	3.68312	0.000120822	GObp	GO_NEGATIVE_REGULATION_OF_CELL_DEATH	133	22	KLF4,PRKCH,GPX1,BCL6,PRDX5,EP300,HSPA5,GSK3B,FOXP1,CDKN1B,ROCK1,FYN,IL1B,CORO1A,DUSP1,NFE2L2,PHIP,MEF2C,LGMN,GRK5,PLAUR,TSC22D3
Blood	24hrs	Treml4+.Mon	3.60287e-08	6.02479	0.000122822	ChemicalGeneticPerturbations	RUTELLA_RESPONSE_TO_CSF2RB_AND_IL4_DN	133	13	PLCL2,NCOA1,RERE,SGMS1,MS4A6A,NKTR,FYN,CCNL1,IL1B,PID1,MEF2C,SETD1B,ATRX
Blood	24hrs	Treml4+.Mon	3.8527e-08	8.24776	0.000131338	ChemicalGeneticPerturbations	CASORELLI_ACUTE_PROMYELOCYTIC_LEUKEMIA_UP	133	10	FOS,NCOA2,SPEN,CSGALNACT2,DUSP1,PLCB1,CBLB,ALCAM,ARHGAP25,TSC22D3
Blood	24hrs	Treml4+.Mon	3.03534e-08	18.6364	0.000141234	GObp	GO_RESPONSE_TO_ANTIBIOTIC	133	6	EP300,HSPA5,CDKN1B,RSRC1,IL1B,MEF2C
Blood	24hrs	Treml4+.Mon	7.62762e-07	6.9151	0.000141874	Kegg	KEGG_CHEMOKINE_SIGNALING_PATHWAY	133	9	ELMO1,GSK3B,VAV3,ROCK1,FGR,PLCB1,LYN,CXCR4,GRK5
Blood	24hrs	Treml4+.Mon	3.53551e-08	2.73189	0.000164507	GObp	GO_REGULATION_OF_PROTEIN_MODIFICATION_PROCESS	133	32	CCND3,KLF4,CALM1,PLCL2,STK38,ARPP19,BCL6,EP300,LRRK1,HSPA5,GSK3B,DUSP5,CDKN1B,ROCK1,FYN,CCNL1,IL6R,IL1B,DUSP1,FGR,PLCB1,LYN,PID1,ZEB2,CXCR4,PHIP,TRPS1,MEF2C,FAF1,PLAUR,MAP3K5,RASSF5
Blood	24hrs	Treml4+.Mon	4.0374e-08	11.2296	0.00018786	GObp	GO_CELLULAR_RESPONSE_TO_REACTIVE_OXYGEN_SPECIES	133	8	KLF4,FOS,SLC8A1,PRDX5,EP300,GSK3B,NFE2L2,MAP3K5
Blood	24hrs	Treml4+.Mon	5.57949e-08	13.2714	0.000190205	ChemicalGeneticPerturbations	HESS_TARGETS_OF_HOXA9_AND_MEIS1_DN	133	7	KLF4,FOS,LSP1,IL1B,DUSP1,FGR,GRK5
Blood	24hrs	Treml4+.Mon	4.29155e-08	3.72502	0.000199686	GObp	GO_POSITIVE_REGULATION_OF_CELL_DIFFERENTIATION	133	21	RUNX1,JUND,FOS,PRKCH,NCOA1,BCL6,EP300,GSK3B,SPEN,MEF2A,FYN,IL6R,IL1B,ARPC2,PLCB1,LYN,ZEB2,CXCR4,MEF2C,INPP5D,MAP3K5
Blood	24hrs	Treml4+.Mon	4.47915e-08	5.0807	0.000208415	GObp	GO_RESPONSE_TO_DRUG	133	15	JUND,FOS,SLC8A1,EP300,ABCG2,B2M,GSK3B,VAV3,CDKN1B,FYN,IL1B,NFE2L2,LYN,MEF2C,GRK5
Blood	24hrs	Treml4+.Mon	4.79404e-08	2.95988	0.000223067	GObp	GO_RESPONSE_TO_OXYGEN_CONTAINING_COMPOUND	133	28	KLF4,CALM1,HBA2,JUND,FOS,NCOA1,GPX1,HBA1,SLC8A1,PRDX5,EP300,ABCG2,B2M,GSK3B,FOXP1,CDKN1B,STK24,FYN,IL1B,DUSP1,NFE2L2,KLF3,PLCB1,LYN,PID1,PHIP,MEF2C,MAP3K5
Blood	24hrs	Treml4+.Mon	5.73817e-08	7.93399	0.000266997	GObp	GO_CELLULAR_RESPONSE_TO_OXIDATIVE_STRESS	133	10	KLF4,FOS,GPX1,SLC8A1,PRDX5,EP300,GSK3B,STK24,NFE2L2,MAP3K5
Blood	24hrs	Treml4+.Mon	8.53157e-08	3.89568	0.000290841	ChemicalGeneticPerturbations	SCHLOSSER_SERUM_RESPONSE_DN	133	19	BACH1,KLF4,CALM1,PLCL2,ELMO1,EP300,HSPA5,NCOA2,ATAD2B,MEF2A,HNRNPA3,NFE2L2,ZEB2,CLINT1,MBNL1,ATP8A1,MAP3K5,LYZ,DHX9
Blood	24hrs	Treml4+.Mon	6.2634e-08	2.78598	0.000291436	GObp	GO_INTRACELLULAR_SIGNAL_TRANSDUCTION	133	30	CALM1,PLCL2,STK38,PRKCH,ELMO1,GPX1,BCL6,SLC8A1,EP300,LRRK1,GSK3B,DUSP5,VAV3,PAG1,CDKN1B,STK24,MEF2A,ROCK1,FYN,IL1B,DUSP1,PLCB1,LYN,CXCR4,MEF2C,INPP5D,ATRX,MAP3K5,RASSF5,DOCK10
Blood	24hrs	Treml4+.Mon	6.58862e-08	3.78691	0.000306569	GObp	GO_REGULATION_OF_CELLULAR_COMPONENT_MOVEMENT	133	20	KLF4,BCL6,SLC8A1,HSPA5,GSK3B,FOXP1,CDKN1B,STK24,ROCK1,IL6R,IL1B,CORO1A,SH3BGRL3,FGR,PLCB1,LYN,CXCR4,MIA3,ATP8A1,DOCK10
Blood	24hrs	Treml4+.Mon	7.1815e-08	5.69913	0.000334155	GObp	GO_RESPONSE_TO_METAL_ION	133	13	CALM1,JUND,FOS,EP300,ABCG2,HSPA5,B2M,GSK3B,CDKN1B,MEF2A,DUSP1,SLC25A13,MEF2C
Blood	24hrs	Treml4+.Mon	6.79358e-06	7.09651	0.000339679	Hallmark	HALLMARK_UV_RESPONSE_DN	133	7	RUNX1,NR3C1,CDKN1B,FYN,DUSP1,GRK5,ATRX
Blood	24hrs	Treml4+.Mon	1.09304e-07	7.44823	0.000372618	ChemicalGeneticPerturbations	ZHENG_FOXP3_TARGETS_IN_THYMUS_UP	133	10	NR3C1,SGMS1,ARHGAP15,PIP4K2A,KLF3,CBLB,CXCR4,MBNL1,MAP3K5,DOCK10
Blood	24hrs	Treml4+.Mon	1.19442e-07	4.72955	0.000407178	ChemicalGeneticPerturbations	FULCHER_INFLAMMATORY_RESPONSE_LECTIN_VS_LPS_DN	133	15	BACH1,KLF4,PLCL2,BCL6,SLC8A1,HSPA5,NR3C1,MS4A6A,CCNL1,CSGALNACT2,DUSP1,KLF3,LYN,ZEB2,LGMN
Blood	24hrs	Treml4+.Mon	6.1668e-07	12.1655	0.000415642	Reactome	REACTOME_TRANSCRIPTIONAL_REGULATION_OF_WHITE_ADIPOCYTE_DIFFERENTIATION	133	6	CCND3,KLF4,CDK8,NCOA1,EP300,NCOA2
Blood	24hrs	Treml4+.Mon	9.35782e-08	15.9257	0.000435419	GObp	GO_REGULATION_OF_B_CELL_PROLIFERATION	133	6	BCL6,VAV3,LYN,MEF2C,RC3H1,INPP5D
Blood	24hrs	Treml4+.Mon	9.67428e-08	2.61857	0.000450144	GObp	GO_REGULATION_OF_TRANSCRIPTION_FROM_RNA_POLYMERASE_II_PROMOTER	133	32	BACH1,KLF4,RUNX1,JUND,FOS,CDK8,NCOA1,BCL6,EP300,HSPA5,NCOA2,GSK3B,RERE,NR3C1,SPEN,ATAD2B,FOXP1,ELF2,STAG1,MEF2A,CCNL1,IL1B,NFE2L2,PID1,ZEB2,CHD1,PHIP,TRPS1,MEF2C,NUCKS1,ATRX,TSC22D3
Blood	24hrs	Treml4+.Mon	9.69818e-08	10.1555	0.000451256	GObp	GO_RESPONSE_TO_CALCIUM_ION	133	8	CALM1,JUND,FOS,EP300,MEF2A,DUSP1,SLC25A13,MEF2C
Blood	24hrs	Treml4+.Mon	1.34155e-07	7.29927	0.000457334	ChemicalGeneticPerturbations	LEE_DIFFERENTIATING_T_LYMPHOCYTE	133	10	CCND3,PRKCH,ARHGAP15,PAG1,CORO1A,CYFIP2,CXCR4,ATP8A1,RASSF5,ARHGAP25
Blood	24hrs	Treml4+.Mon	9.93196e-06	5.83942	0.000496598	Hallmark	HALLMARK_HYPOXIA	133	8	FOS,PRDX5,HSPA5,NR3C1,CDKN1B,DUSP1,CXCR4,PLAUR
Blood	24hrs	Treml4+.Mon	1.19863e-07	2.70678	0.000557724	GObp	GO_REGULATION_OF_PHOSPHORUS_METABOLIC_PROCESS	133	30	CCND3,KLF4,CALM1,PLCL2,STK38,ARPP19,EP300,LRRK1,HSPA5,GSK3B,DUSP5,VAV3,CDKN1B,ROCK1,FYN,CCNL1,IL6R,IL1B,DUSP1,FGR,PLCB1,LYN,PID1,ZEB2,CXCR4,PHIP,MEF2C,FAF1,PLAUR,MAP3K5
Blood	24hrs	Treml4+.Mon	1.22533e-07	8.42223	0.000570147	GObp	GO_CELLULAR_RESPONSE_TO_INORGANIC_SUBSTANCE	133	9	JUND,FOS,HSPA5,B2M,GSK3B,CDKN1B,MEF2A,MEF2C,ATRX
Blood	24hrs	Treml4+.Mon	2.25759e-07	3.51772	0.000769613	ChemicalGeneticPerturbations	CUI_TCF21_TARGETS_2_DN	133	20	KLF4,CALM1,PRKCH,PUM2,SGMS1,PAG1,ROCK1,FYN,CSGALNACT2,PTPN12,CERS6,CORO1A,KLF3,CBLB,FGD4,ZEB2,CXCR4,MEF2C,UBR3,GRK5
Blood	24hrs	Treml4+.Mon	1.65903e-07	2.61139	0.000771949	GObp	GO_POSITIVE_REGULATION_OF_GENE_EXPRESSION	133	31	BACH1,KLF4,RUNX1,JUND,FOS,CDK8,PRKCH,NCOA1,EP300,HSPA5,NCOA2,GSK3B,RERE,NR3C1,ATAD2B,ELF2,STAG1,MEF2A,CCNL1,IL6R,IL1B,NFE2L2,PLCB1,PID1,ZEB2,CHD1,PHIP,TRPS1,MEF2C,NUCKS1,ATRX
Blood	24hrs	Treml4+.Mon	1.72965e-07	4.10207	0.000804807	GObp	GO_POSITIVE_REGULATION_OF_CELL_DEATH	133	17	HBA2,NCOA1,HBA1,BCL6,EP300,GSK3B,VAV3,CDKN1B,IL1B,DUSP1,LYN,FGD4,MEF2C,FAF1,PLAUR,INPP5D,MAP3K5
Blood	24hrs	Treml4+.Mon	2.00057e-07	29.1971	0.000930863	GObp	GO_HYDROGEN_PEROXIDE_CATABOLIC_PROCESS	133	4	HBA2,GPX1,HBA1,PRDX5
Blood	24hrs	Treml4+.Mon	1.4583e-06	20.1359	0.000982894	Reactome	REACTOME_ANTIGEN_ACTIVATES_B_CELL_RECEPTOR_LEADING_TO_GENERATION_OF_SECOND_MESSENGERS	133	4	CALM1,FYN,CBLB,LYN
Blood	24hrs	Treml4+.Mon	2.28067e-07	9.19593	0.0010612	GObp	GO_POSITIVE_REGULATION_OF_BINDING	133	8	KLF4,CALM1,PLCL2,EP300,B2M,GSK3B,MEF2C,PLAUR
Blood	24hrs	Treml4+.Mon	1.63095e-06	13.7722	0.00109926	Reactome	REACTOME_CIRCADIAN_CLOCK	133	5	NCOA1,EP300,NCOA2,NR3C1,MEF2C
Blood	24hrs	Treml4+.Mon	3.41695e-07	17.8031	0.00116484	ChemicalGeneticPerturbations	GENTILE_UV_RESPONSE_CLUSTER_D2	133	5	BACH1,RUNX1,DUSP5,NFE2L2,CHD1
Blood	24hrs	Treml4+.Mon	3.51549e-07	4.65557	0.00119843	ChemicalGeneticPerturbations	MITSIADES_RESPONSE_TO_APLIDIN_UP	133	14	BACH1,KLF4,RUNX1,JUND,TMSB4Y,DUSP5,ATAD2B,CCNL1,DUSP1,NFE2L2,CXCR4,SLC25A13,DENND4A,TSC22D3
Blood	24hrs	Treml4+.Mon	3.77293e-07	7.46516	0.00128619	ChemicalGeneticPerturbations	NAGASHIMA_NRG1_SIGNALING_UP	133	9	FOS,DUSP5,HERC4,STK24,CCNL1,IL6R,DUSP1,CXCR4,PLAUR
Blood	24hrs	Treml4+.Mon	2.86221e-07	2.8603	0.00133179	GObp	GO_REGULATION_OF_HYDROLASE_ACTIVITY	133	26	KLF4,CALM1,ARPP19,ELMO1,GPX1,BCL6,PRDX5,EP300,HSPA5,GSK3B,VAV3,ARHGAP15,CDKN1B,ROCK1,FYN,SH3BGRL3,WRN,PLCB1,CYFIP2,FGD4,MEF2C,DENND4A,PLAUR,MAP3K5,ARHGAP25,DOCK10
Blood	24hrs	Treml4+.Mon	2.90673e-07	10.7568	0.0013525	GObp	GO_FC_GAMMA_RECEPTOR_SIGNALING_PATHWAY	133	7	ELMO1,VAV3,FYN,FGR,ARPC2,CYFIP2,LYN
Blood	24hrs	Treml4+.Mon	4.08934e-07	8.58738	0.00139406	ChemicalGeneticPerturbations	PICCALUGA_ANGIOIMMUNOBLASTIC_LYMPHOMA_DN	133	8	KLF4,JUND,FOXP1,CCNL1,CSGALNACT2,CHD1,SETD2,TSC22D3
Blood	24hrs	Treml4+.Mon	4.15172e-07	12.8811	0.00141532	ChemicalGeneticPerturbations	DELPUECH_FOXO3_TARGETS_UP	133	6	BCL6,RERE,DUSP5,CORO1A,PLAUR,MAP3K5
Blood	24hrs	Treml4+.Mon	3.1005e-07	3.20847	0.00144266	GObp	GO_CELL_DEATH	133	22	KLF4,ELMO1,GPX1,PRDX5,EP300,GSK3B,SGMS1,CDKN1B,STK24,MEF2A,ROCK1,IL6R,IL1B,CYFIP2,CXCR4,MEF2C,FAF1,GRK5,PLAUR,INPP5D,MAP3K5,RASSF5
Blood	24hrs	Treml4+.Mon	3.3608e-07	26.5428	0.00156378	GObp	GO_BONE_CELL_DEVELOPMENT	133	4	EP300,LRRK1,FOXP1,PIP4K2A
Blood	24hrs	Treml4+.Mon	3.38282e-07	3.57438	0.00157403	GObp	GO_REGULATION_OF_KINASE_ACTIVITY	133	19	CCND3,KLF4,CALM1,STK38,HSPA5,GSK3B,DUSP5,VAV3,CDKN1B,CCNL1,IL6R,IL1B,DUSP1,FGR,LYN,ZEB2,CXCR4,FAF1,MAP3K5
Blood	24hrs	Treml4+.Mon	6.43681e-07	2.89558	0.00219431	ChemicalGeneticPerturbations	CHEN_METABOLIC_SYNDROM_NETWORK	133	24	BACH1,FOS,SLC8A1,DUSP5,MS4A6A,ARHGAP15,FOXP1,PIP4K2A,STK24,CERS6,ABHD12,CORO1A,NFE2L2,CLEC4C,SH3BGRL3,ARPC2,LYN,SLC9A9,LGMN,PLAUR,INPP5D,RASSF5,ARHGAP25,DOCK10
Blood	24hrs	Treml4+.Mon	3.43803e-06	4.4238	0.00231723	Reactome	REACTOME_DEVELOPMENTAL_BIOLOGY	133	12	CCND3,KLF4,CDK8,NCOA1,EP300,NCOA2,TLN1,MEF2A,ROCK1,FYN,ALCAM,MEF2C
Blood	24hrs	Treml4+.Mon	1.26451e-05	9.73236	0.00235199	Kegg	KEGG_B_CELL_RECEPTOR_SIGNALING_PATHWAY	133	5	FOS,GSK3B,VAV3,LYN,INPP5D
Blood	24hrs	Treml4+.Mon	5.27477e-07	16.5893	0.00245435	GObp	GO_MYELOID_CELL_DEVELOPMENT	133	5	BCL6,EP300,LRRK1,FOXP1,PIP4K2A
Blood	24hrs	Treml4+.Mon	5.65049e-07	3.10008	0.00262917	GObp	GO_POSITIVE_REGULATION_OF_PHOSPHATE_METABOLIC_PROCESS	133	22	CCND3,CALM1,EP300,LRRK1,HSPA5,GSK3B,DUSP5,VAV3,CDKN1B,FYN,CCNL1,IL6R,IL1B,FGR,PLCB1,LYN,PID1,ZEB2,CXCR4,MEF2C,PLAUR,MAP3K5
Blood	24hrs	Treml4+.Mon	5.65049e-07	3.10008	0.00262917	GObp	GO_POSITIVE_REGULATION_OF_PHOSPHORUS_METABOLIC_PROCESS	133	22	CCND3,CALM1,EP300,LRRK1,HSPA5,GSK3B,DUSP5,VAV3,CDKN1B,FYN,CCNL1,IL6R,IL1B,FGR,PLCB1,LYN,PID1,ZEB2,CXCR4,MEF2C,PLAUR,MAP3K5
Blood	24hrs	Treml4+.Mon	4.45461e-06	16.2206	0.00300241	Reactome	REACTOME_BMAL1_CLOCK_NPAS2_ACTIVATES_CIRCADIAN_EXPRESSION	133	4	NCOA1,EP300,NCOA2,NR3C1
Blood	24hrs	Treml4+.Mon	6.7709e-07	9.64055	0.0031505	GObp	GO_FAT_CELL_DIFFERENTIATION	133	7	KLF4,GPX1,EP300,GSK3B,PLCB1,PID1,GRK5
Blood	24hrs	Treml4+.Mon	6.78217e-07	11.9988	0.00315574	GObp	GO_NEGATIVE_REGULATION_OF_MAP_KINASE_ACTIVITY	133	6	STK38,GSK3B,DUSP5,IL1B,DUSP1,LYN
Blood	24hrs	Treml4+.Mon	9.66864e-07	6.73779	0.00329604	ChemicalGeneticPerturbations	STARK_PREFRONTAL_CORTEX_22Q11_DELETION_UP	133	9	SLC8A1,GSK3B,FOXP1,ROCK1,CYFIP2,ZEB2,MEF2C,MIA3,ATP8A1
Blood	24hrs	Treml4+.Mon	1.01503e-06	5.95859	0.00346025	ChemicalGeneticPerturbations	RUTELLA_RESPONSE_TO_HGF_VS_CSF2RB_AND_IL4_DN	133	10	RUNX1,LRRK1,DUSP5,MS4A6A,NKTR,CCNL1,CERS6,CXCR4,SETD1B,ATRX
Blood	24hrs	Treml4+.Mon	7.62762e-07	6.9151	0.00354913	GObp	GO_PHAGOCYTOSIS	133	9	ELMO1,VAV3,FYN,CORO1A,FGR,ARPC2,CYFIP2,LYN,MYO7A
Blood	24hrs	Treml4+.Mon	8.54508e-05	6.95169	0.00427254	Hallmark	HALLMARK_PI3K_AKT_MTOR_SIGNALING	133	5	GSK3B,VAV3,CDKN1B,PLCB1,CXCR4
Blood	24hrs	Treml4+.Mon	1.02296e-06	2.36294	0.00475985	GObp	GO_PHOSPHATE_CONTAINING_COMPOUND_METABOLIC_PROCESS	133	32	CALM1,MAK,CDK8,STK38,PRKCH,GPX1,PRDX5,NDUFA6,LRRK1,GSK3B,DUSP5,SGMS1,PIP4K2A,STK24,MEF2A,ROCK1,FYN,SLC44A2,RSRC1,PTPN12,IL1B,ABHD12,DUSP1,FGR,PLCB1,LYN,SLC25A13,MEF2C,GRK5,PLAUR,INPP5D,MAP3K5
Blood	24hrs	Treml4+.Mon	1.45445e-06	14.0371	0.00495823	ChemicalGeneticPerturbations	DUNNE_TARGETS_OF_AML1_MTG8_FUSION_UP	133	5	IL6R,RNASE3,RNASE2,CXCR4,LYZ
Blood	24hrs	Treml4+.Mon	1.47925e-06	4.43414	0.00504275	ChemicalGeneticPerturbations	GRYDER_PAX3FOXO1_ENHANCERS_KO_DOWN	133	13	RUNX1,ELMO1,NR3C1,SGMS1,STK24,SETBP1,PTPN12,HNRNPA3,NFE2L2,ARPC2,PID1,CLINT1,DOCK10
Blood	24hrs	Treml4+.Mon	1.10701e-06	2.3546	0.00515092	GObp	GO_IMMUNE_SYSTEM_PROCESS	133	32	CCND3,KLF4,RUNX1,PLCL2,ELMO1,BCL6,EP300,LRRK1,B2M,VAV3,FOXP1,PAG1,PIP4K2A,ROCK1,FYN,IL6R,IL1B,RNASE3,CORO1A,CLEC4C,FGR,ARPC2,ANKRD17,CYFIP2,LYN,CXCR4,ALCAM,MEF2C,LGMN,RC3H1,INPP5D,MAP3K5
Blood	24hrs	Treml4+.Mon	1.19263e-06	2.59658	0.00554929	GObp	GO_POSITIVE_REGULATION_OF_CATALYTIC_ACTIVITY	133	27	CCND3,KLF4,CALM1,ELMO1,HSPA5,GSK3B,DUSP5,VAV3,ARHGAP15,CDKN1B,FYN,CCNL1,IL1B,SH3BGRL3,FGR,WRN,PLCB1,CYFIP2,LYN,FGD4,ZEB2,CXCR4,MEF2C,DENND4A,MAP3K5,ARHGAP25,DOCK10
Blood	24hrs	Treml4+.Mon	1.8818e-06	5.59331	0.00641506	ChemicalGeneticPerturbations	BILD_HRAS_ONCOGENIC_SIGNATURE	133	10	RUNX1,FOS,BCL6,DUSP5,CCNL1,IL1B,DUSP1,LYN,PLAUR,ARHGAP25
Blood	24hrs	Treml4+.Mon	1.42893e-06	2.57285	0.0066488	GObp	GO_POSITIVE_REGULATION_OF_CELL_COMMUNICATION	133	27	CALM1,PRKCH,GPX1,LRRK1,PUM2,NCOA2,GSK3B,DUSP5,VAV3,PAG1,PIP4K2A,FYN,IL6R,SLC44A2,IL1B,FGR,ANKRD17,PLCB1,LYN,ZEB2,CXCR4,PHIP,FAF1,NUCKS1,RC3H1,PLAUR,MAP3K5
Blood	24hrs	Treml4+.Mon	1.43063e-06	2.85031	0.0066567	GObp	GO_REGULATION_OF_ORGANELLE_ORGANIZATION	133	23	GPX1,BCL6,EP300,TMSB4Y,GSK3B,ATAD2B,PIP4K2A,CDKN1B,ROCK1,IL1B,RNASE2,CORO1A,DUSP1,SH3BGRL3,ARPC2,PLCB1,PID1,ZEB2,PHIP,TRPS1,MEF2C,PLAUR,ATRX
Blood	24hrs	Treml4+.Mon	1.43918e-06	4.44452	0.00669652	GObp	GO_ACTIVATION_OF_IMMUNE_RESPONSE	133	13	ELMO1,EP300,VAV3,PAG1,FYN,CLEC4C,FGR,ARPC2,CYFIP2,LYN,MEF2C,LGMN,INPP5D
Blood	24hrs	Treml4+.Mon	2.06805e-06	7.07808	0.00704998	ChemicalGeneticPerturbations	PASQUALUCCI_LYMPHOMA_BY_GC_STAGE_DN	133	8	LSP1,PUM2,ARHGAP15,CORO1A,CYFIP2,CHD1,NUCKS1,RASSF3
Blood	24hrs	Treml4+.Mon	1.56881e-06	2.40503	0.00729968	GObp	GO_RESPONSE_TO_EXTERNAL_STIMULUS	133	30	JUND,FOS,NCOA1,GPX1,LSP1,SLC8A1,ABCG2,HSPA5,B2M,GSK3B,VAV3,FOXP1,FYN,IL6R,IL1B,RNASE3,RNASE2,ABHD12,CORO1A,NFE2L2,FGR,WRN,ANKRD17,LYN,CXCR4,ALCAM,MEF2C,XPR1,PLAUR,LYZ
Blood	24hrs	Treml4+.Mon	1.59069e-06	6.378	0.00740149	GObp	GO_FC_RECEPTOR_SIGNALING_PATHWAY	133	9	CALM1,FOS,ELMO1,VAV3,FYN,FGR,ARPC2,CYFIP2,LYN
Blood	24hrs	Treml4+.Mon	1.60431e-06	3.88949	0.00746485	GObp	GO_REGULATION_OF_CYTOKINE_PRODUCTION	133	15	KLF4,RUNX1,BCL6,EP300,PUM2,B2M,FOXP1,IL6R,IL1B,FGR,ANKRD17,PLCB1,LYN,INPP5D,DHX9
Blood	24hrs	Treml4+.Mon	1.60431e-06	3.88949	0.00746485	GObp	GO_POSITIVE_REGULATION_OF_IMMUNE_RESPONSE	133	15	ELMO1,EP300,B2M,VAV3,PAG1,FYN,IL1B,CLEC4C,FGR,ARPC2,CYFIP2,LYN,MEF2C,LGMN,INPP5D
Blood	24hrs	Treml4+.Mon	1.64276e-06	3.22901	0.00764378	GObp	GO_RESPONSE_TO_NITROGEN_COMPOUND	133	19	KLF4,CALM1,JUND,FOS,SLC8A1,EP300,ABCG2,GSK3B,CDKN1B,FYN,IL1B,DUSP1,KLF3,PLCB1,LYN,PHIP,MEF2C,ATRX,MAP3K5
Blood	24hrs	Treml4+.Mon	1.74036e-06	19.4647	0.00809789	GObp	GO_NEGATIVE_REGULATION_OF_B_CELL_ACTIVATION	133	4	BCL6,LYN,RC3H1,INPP5D
Blood	24hrs	Treml4+.Mon	1.74036e-06	19.4647	0.00809789	GObp	GO_HYDROGEN_PEROXIDE_METABOLIC_PROCESS	133	4	HBA2,GPX1,HBA1,PRDX5
Blood	24hrs	Treml4+.Mon	1.79883e-06	3.85525	0.00836994	GObp	GO_CELL_ACTIVATION	133	15	CCND3,PLCL2,PRKCH,BCL6,EP300,B2M,VAV3,FOXP1,TLN1,FYN,CORO1A,PLCB1,LYN,MEF2C,RC3H1
Blood	24hrs	Treml4+.Mon	1.88729e-06	4.34282	0.00878156	GObp	GO_NEGATIVE_REGULATION_OF_INTRACELLULAR_SIGNAL_TRANSDUCTION	133	13	KLF4,CALM1,STK38,GPX1,BCL6,GSK3B,DUSP5,IL1B,DUSP1,NFE2L2,LYN,FAF1,PLAUR
Blood	24hrs	Treml4+.Mon	1.95796e-06	2.88302	0.00911037	GObp	GO_LOCOMOTION	133	22	ELMO1,GPX1,LSP1,GSK3B,RERE,VAV3,ROCK1,FYN,IL6R,IL1B,RNASE2,CORO1A,FGR,LYN,ZEB2,CXCR4,ALCAM,SETD2,MEF2C,XPR1,PLAUR,INPP5D
Blood	24hrs	Treml4+.Mon	2.03061e-06	2.58557	0.00944842	GObp	GO_REGULATION_OF_RESPONSE_TO_STRESS	133	26	KLF4,ELMO1,GPX1,BCL6,EP300,HSPA5,PUM2,B2M,GSK3B,FOXP1,PIP4K2A,STK24,FYN,IL1B,NFE2L2,CLEC4C,FGR,ANKRD17,PLCB1,LYN,ZEB2,EXOC4,MEF2C,LGMN,PLAUR,MAP3K5
Blood	24hrs	Treml4+.Mon	3.07738e-06	4.46894	0.0104908	ChemicalGeneticPerturbations	LINDGREN_BLADDER_CANCER_CLUSTER_2B	133	12	KLF4,CALM1,PRKCH,DUSP5,ARHGAP15,FYN,ARPC2,CXCR4,GRK5,PLAUR,LYZ,TSC22D3
Blood	24hrs	Treml4+.Mon	2.25926e-06	3.28878	0.0105123	GObp	GO_CELLULAR_RESPONSE_TO_OXYGEN_CONTAINING_COMPOUND	133	18	KLF4,FOS,SLC8A1,PRDX5,EP300,ABCG2,B2M,GSK3B,FYN,IL1B,NFE2L2,KLF3,PLCB1,LYN,PID1,PHIP,MEF2C,MAP3K5
Blood	24hrs	Treml4+.Mon	3.1139e-06	5.91833	0.0106153	ChemicalGeneticPerturbations	ZWANG_CLASS_3_TRANSIENTLY_INDUCED_BY_EGF	133	9	KLF4,RUNX1,FOS,DUSP5,CCNL1,IL1B,DUSP1,KLF3,PLAUR
Blood	24hrs	Treml4+.Mon	3.17377e-06	4.15276	0.0108194	ChemicalGeneticPerturbations	SENESE_HDAC1_TARGETS_UP	133	13	BACH1,GSK3B,DUSP5,PIP4K2A,IL6R,CSGALNACT2,PTPN12,CERS6,NFE2L2,KLF3,MBNL1,DOCK10,DHX9
Blood	24hrs	Treml4+.Mon	3.32428e-06	17.1748	0.0113325	ChemicalGeneticPerturbations	SCHOEN_NFKB_SIGNALING	133	4	KLF4,BCL6,CDKN1B,IL1B
Blood	24hrs	Treml4+.Mon	2.51427e-06	8.1103	0.0116989	GObp	GO_NEGATIVE_REGULATION_OF_PROTEIN_SERINE_THREONINE_KINASE_ACTIVITY	133	7	STK38,GSK3B,DUSP5,CDKN1B,IL1B,DUSP1,LYN
Blood	24hrs	Treml4+.Mon	2.55106e-06	2.44473	0.0118701	GObp	GO_REGULATION_OF_MULTICELLULAR_ORGANISMAL_DEVELOPMENT	133	28	KLF4,RUNX1,FOS,PRKCH,NCOA1,GPX1,BCL6,SLC8A1,EP300,B2M,GSK3B,SPEN,FOXP1,CDKN1B,STK24,ROCK1,FYN,IL1B,NFE2L2,PLCB1,LYN,ZEB2,CXCR4,TRPS1,MEF2C,RC3H1,INPP5D,TSC22D3
Blood	24hrs	Treml4+.Mon	2.55403e-06	2.61623	0.0118839	GObp	GO_POSITIVE_REGULATION_OF_MULTICELLULAR_ORGANISMAL_PROCESS	133	25	RUNX1,JUND,FOS,PRKCH,NCOA1,BCL6,SLC8A1,PRDX5,EP300,B2M,GSK3B,SPEN,FOXP1,FYN,IL6R,IL1B,NFE2L2,FGR,PLCB1,LYN,ZEB2,CXCR4,MEF2C,INPP5D,DHX9
Blood	24hrs	Treml4+.Mon	3.63204e-06	4.40157	0.0123816	ChemicalGeneticPerturbations	TARTE_PLASMA_CELL_VS_PLASMABLAST_UP	133	12	RUNX1,JUND,FOS,B2M,RNASE3,DUSP1,FGR,CBLB,MIA3,LGMN,LYZ,TSC22D3
Blood	24hrs	Treml4+.Mon	3.79729e-06	5.78797	0.0129449	ChemicalGeneticPerturbations	PHONG_TNF_RESPONSE_VIA_P38_COMPLETE	133	9	BACH1,FOS,NCOA2,NR3C1,DUSP5,NKTR,CCNL1,PTPN12,PHIP
Blood	24hrs	Treml4+.Mon	1.95854e-05	3.75928	0.0132006	Reactome	REACTOME_HEMOSTASIS	133	12	CALM1,PRKCH,SLC8A1,EP300,HSPA5,VAV3,TLN1,FYN,FGR,LYN,PLAUR,DOCK10
Blood	24hrs	Treml4+.Mon	2.97066e-06	2.81233	0.0138225	GObp	GO_POSITIVE_REGULATION_OF_DEVELOPMENTAL_PROCESS	133	22	RUNX1,JUND,FOS,PRKCH,NCOA1,BCL6,SLC8A1,EP300,GSK3B,SPEN,MEF2A,FYN,IL6R,IL1B,ARPC2,PLCB1,LYN,ZEB2,CXCR4,MEF2C,INPP5D,MAP3K5
Blood	24hrs	Treml4+.Mon	4.05898e-06	9.22013	0.0138371	ChemicalGeneticPerturbations	HOEBEKE_LYMPHOID_STEM_CELL_UP	133	6	BCL6,RERE,SETBP1,MEF2A,CCNL1,ARHGAP25
Blood	24hrs	Treml4+.Mon	4.56369e-06	11.5861	0.0155576	ChemicalGeneticPerturbations	FLECHNER_PBL_KIDNEY_TRANSPLANT_REJECTED_VS_OK_UP	133	5	B2M,PTPN12,HNRNPA3,LYN,TSC22D3
Blood	24hrs	Treml4+.Mon	4.66823e-06	2.53095	0.015914	ChemicalGeneticPerturbations	PUJANA_ATM_PCC_NETWORK	133	25	NOP56,RUNX1,PLCL2,STK38,BCL6,EP300,TMSB4Y,B2M,NR3C1,NKTR,ROCK1,HNRNPA3,CORO1A,ARPC2,LYN,SCAF11,CXCR4,PHIP,TECPR2,CLINT1,MBNL1,INPP5D,ARHGAP25,DOCK10,DHX9
Blood	24hrs	Treml4+.Mon	3.77153e-06	11.966	0.0175489	GObp	GO_CELLULAR_RESPONSE_TO_HYDROGEN_PEROXIDE	133	5	KLF4,EP300,GSK3B,NFE2L2,MAP3K5
Blood	24hrs	Treml4+.Mon	9.99149e-05	6.75858	0.0185842	Kegg	KEGG_T_CELL_RECEPTOR_SIGNALING_PATHWAY	133	5	FOS,GSK3B,VAV3,FYN,CBLB
Blood	24hrs	Treml4+.Mon	5.56318e-06	5.54375	0.0189649	ChemicalGeneticPerturbations	HOSHIDA_LIVER_CANCER_SUBCLASS_S1	133	9	STK38,LSP1,DUSP5,CORO1A,ARPC2,LYN,CXCR4,LGMN,PLAUR
Blood	24hrs	Treml4+.Mon	4.1031e-06	5.15849	0.0190917	GObp	GO_REGULATION_OF_BINDING	133	10	KLF4,CALM1,PLCL2,EP300,HSPA5,B2M,GSK3B,ROCK1,MEF2C,PLAUR
Blood	24hrs	Treml4+.Mon	5.71205e-06	4.98244	0.0194724	ChemicalGeneticPerturbations	HADDAD_B_LYMPHOCYTE_PROGENITOR	133	10	CALM1,STK38,ABCG2,ATAD2B,ELF2,CDKN1B,MEF2A,CYFIP2,CXCR4,MEF2C
Blood	24hrs	Treml4+.Mon	4.38329e-06	4.03789	0.0203954	GObp	GO_REGULATION_OF_PROTEIN_SERINE_THREONINE_KINASE_ACTIVITY	133	13	CCND3,CALM1,STK38,GSK3B,DUSP5,CDKN1B,CCNL1,IL1B,DUSP1,LYN,ZEB2,CXCR4,MAP3K5
Blood	24hrs	Treml4+.Mon	4.60194e-06	4.02078	0.0214128	GObp	GO_POSITIVE_REGULATION_OF_CELL_DEVELOPMENT	133	13	PRKCH,NCOA1,BCL6,EP300,GSK3B,SPEN,FYN,IL1B,ARPC2,LYN,ZEB2,CXCR4,MEF2C
Blood	24hrs	Treml4+.Mon	4.62871e-06	6.41694	0.0215374	GObp	GO_RESPONSE_TO_KETONE	133	8	KLF4,CALM1,FOS,NCOA1,EP300,ABCG2,IL1B,DUSP1
Blood	24hrs	Treml4+.Mon	5.10191e-06	2.99538	0.0237392	GObp	GO_REGULATION_OF_RESPONSE_TO_EXTERNAL_STIMULUS	133	19	KLF4,CALM1,ELMO1,GPX1,BCL6,PUM2,B2M,FOXP1,PIP4K2A,STK24,FYN,IL6R,IL1B,NFE2L2,ANKRD17,LYN,CXCR4,EXOC4,PLAUR
Blood	24hrs	Treml4+.Mon	5.60249e-06	2.63346	0.0260684	GObp	GO_MOVEMENT_OF_CELL_OR_SUBCELLULAR_COMPONENT	133	23	ELMO1,GPX1,LSP1,GSK3B,RERE,VAV3,TLN1,ROCK1,FYN,IL6R,IL1B,CORO1A,FGR,ARPC2,LYN,ZEB2,MYO7A,CXCR4,ALCAM,SETD2,MEF2C,PLAUR,INPP5D
Blood	24hrs	Treml4+.Mon	7.90792e-06	6.95169	0.0269581	ChemicalGeneticPerturbations	PODAR_RESPONSE_TO_ADAPHOSTIN_UP	133	7	BACH1,JUND,NCOA2,DUSP5,FYN,CSGALNACT2,DUSP1
Blood	24hrs	Treml4+.Mon	5.84764e-06	3.93737	0.0272091	GObp	GO_POSITIVE_REGULATION_OF_KINASE_ACTIVITY	133	13	CCND3,CALM1,HSPA5,DUSP5,VAV3,CDKN1B,CCNL1,IL1B,FGR,LYN,ZEB2,CXCR4,MAP3K5
Blood	24hrs	Treml4+.Mon	6.03898e-06	2.69436	0.0280994	GObp	GO_NEGATIVE_REGULATION_OF_CELL_COMMUNICATION	133	22	KLF4,CALM1,PLCL2,STK38,GPX1,BCL6,HSPA5,GSK3B,DUSP5,FOXP1,FYN,IL1B,DUSP1,NFE2L2,LYN,PID1,PHIP,LGMN,FAF1,GRK5,PLAUR,INPP5D
Blood	24hrs	Treml4+.Mon	6.29137e-06	6.17928	0.0292737	GObp	GO_MYELOID_CELL_DIFFERENTIATION	133	8	RUNX1,BCL6,EP300,LRRK1,FOXP1,PIP4K2A,LYN,MEF2C
Blood	24hrs	Treml4+.Mon	6.42445e-06	3.90496	0.029893	GObp	GO_IMMUNE_EFFECTOR_PROCESS	133	13	PLCL2,ELMO1,VAV3,FOXP1,FYN,IL6R,CORO1A,FGR,ARPC2,CYFIP2,LYN,RC3H1,INPP5D
Blood	24hrs	Treml4+.Mon	9.03644e-06	3.23962	0.0308052	ChemicalGeneticPerturbations	WONG_ADULT_TISSUE_STEM_MODULE	133	16	BACH1,KLF4,JUND,FOS,LSP1,SLC8A1,ABCG2,B2M,FOXP1,MEF2A,FYN,PTPN12,IL1B,DUSP1,ALCAM,CEP170
Blood	24hrs	Treml4+.Mon	6.78724e-06	2.93827	0.031581	GObp	GO_PROTEIN_PHOSPHORYLATION	133	19	CALM1,MAK,CDK8,STK38,PRKCH,LRRK1,GSK3B,DUSP5,STK24,MEF2A,ROCK1,FYN,RSRC1,IL1B,FGR,LYN,MEF2C,GRK5,MAP3K5
Blood	24hrs	Treml4+.Mon	7.00267e-06	2.93205	0.0325834	GObp	GO_REGULATION_OF_TRANSFERASE_ACTIVITY	133	19	CCND3,KLF4,CALM1,STK38,HSPA5,GSK3B,DUSP5,VAV3,CDKN1B,CCNL1,IL6R,IL1B,DUSP1,FGR,LYN,ZEB2,CXCR4,FAF1,MAP3K5
Blood	24hrs	Treml4+.Mon	0.000175312	7.68344	0.032608	Kegg	KEGG_PHOSPHATIDYLINOSITOL_SIGNALING_SYSTEM	133	4	CALM1,PIP4K2A,PLCB1,INPP5D
Blood	24hrs	Treml4+.Mon	9.63077e-06	6.76754	0.0328313	ChemicalGeneticPerturbations	BOSCO_ALLERGEN_INDUCED_TH2_ASSOCIATED_MODULE	133	7	BCL6,DUSP5,IL1B,CERS6,KLF3,MEF2C,TSC22D3
Blood	24hrs	Treml4+.Mon	9.72568e-06	13.9034	0.0331549	ChemicalGeneticPerturbations	AMIT_EGF_RESPONSE_40_HELA	133	4	DUSP5,CCNL1,DUSP1,MBNL1
Blood	24hrs	Treml4+.Mon	7.14923e-06	7.04757	0.0332654	GObp	GO_NEGATIVE_REGULATION_OF_MAPK_CASCADE	133	7	KLF4,STK38,GSK3B,DUSP5,IL1B,DUSP1,LYN
Blood	24hrs	Treml4+.Mon	9.86805e-06	5.19316	0.0336402	ChemicalGeneticPerturbations	DANG_REGULATED_BY_MYC_DN	133	9	KLF4,CDKN1B,ROCK1,DUSP1,CYFIP2,PLAUR,ATRX,LYZ,ARHGAP25
Blood	24hrs	Treml4+.Mon	7.5381e-06	4.43602	0.0350748	GObp	GO_RESPONSE_TO_ALCOHOL	133	11	KLF4,CALM1,FOS,NCOA1,EP300,ABCG2,GSK3B,CDKN1B,FYN,IL1B,DUSP1
Blood	24hrs	Treml4+.Mon	7.60611e-06	14.5985	0.0353912	GObp	GO_REGULATION_OF_PHOSPHATIDYLINOSITOL_3_KINASE_ACTIVITY	133	4	KLF4,VAV3,FGR,LYN
Blood	24hrs	Treml4+.Mon	1.08107e-05	9.999	0.0368536	ChemicalGeneticPerturbations	ADDYA_ERYTHROID_DIFFERENTIATION_BY_HEMIN	133	5	NCOA1,HBA1,HSPA5,MEF2C,DHX9
Blood	24hrs	Treml4+.Mon	0.000210384	7.39167	0.0391315	Kegg	KEGG_FC_EPSILON_RI_SIGNALING_PATHWAY	133	4	VAV3,FYN,LYN,INPP5D
Blood	24hrs	Treml4+.Mon	8.61506e-06	14.2425	0.0400859	GObp	GO_REGULATION_OF_ANTIGEN_RECEPTOR_MEDIATED_SIGNALING_PATHWAY	133	4	PLCL2,PRKCH,LYN,RC3H1
Blood	24hrs	Treml4+.Mon	9.21322e-06	2.70105	0.0428691	GObp	GO_POSITIVE_REGULATION_OF_PROTEIN_MODIFICATION_PROCESS	133	21	CCND3,CALM1,BCL6,EP300,LRRK1,HSPA5,GSK3B,DUSP5,CDKN1B,FYN,CCNL1,IL6R,IL1B,PLCB1,LYN,ZEB2,CXCR4,MEF2C,PLAUR,MAP3K5,RASSF5
Blood	24hrs	Treml4+.Mon	9.53798e-06	3.2262	0.0443802	GObp	GO_TRANSCRIPTION_FROM_RNA_POLYMERASE_II_PROMOTER	133	16	BACH1,KLF4,RUNX1,JUND,FOS,CDK8,EP300,NR3C1,STAG1,MEF2A,NFE2L2,ZEB2,SETD2,TRPS1,MEF2C,NUCKS1
Blood	24hrs	Treml4+.Mon	9.72568e-06	13.9034	0.0452536	GObp	GO_POSITIVE_REGULATION_OF_DNA_BINDING	133	4	KLF4,CALM1,EP300,PLAUR
Blood	24hrs	Treml4+.Mon	9.80626e-06	2.61537	0.0456285	GObp	GO_PHOSPHORYLATION	133	22	CALM1,MAK,CDK8,STK38,PRKCH,NDUFA6,LRRK1,GSK3B,DUSP5,SGMS1,PIP4K2A,STK24,MEF2A,ROCK1,FYN,RSRC1,IL1B,FGR,LYN,MEF2C,GRK5,MAP3K5
Blood	24hrs	Treml4+.Mon	9.91361e-06	3.75804	0.046128	GObp	GO_CELLULAR_RESPONSE_TO_NITROGEN_COMPOUND	133	13	KLF4,SLC8A1,EP300,GSK3B,FYN,IL1B,KLF3,PLCB1,LYN,PHIP,MEF2C,ATRX,MAP3K5
Blood	24hrs	Treml4+.Mon	9.91408e-06	4.31677	0.0461302	GObp	GO_NEGATIVE_REGULATION_OF_IMMUNE_SYSTEM_PROCESS	133	11	RUNX1,PLCL2,GPX1,BCL6,PAG1,NFE2L2,PLCB1,LYN,RC3H1,INPP5D,TSC22D3
Blood	24hrs	Treml4+.Mon	9.93966e-06	4.00875	0.0462492	GObp	GO_POSITIVE_REGULATION_OF_NERVOUS_SYSTEM_DEVELOPMENT	133	12	PRKCH,NCOA1,BCL6,EP300,GSK3B,SPEN,FYN,IL1B,LYN,ZEB2,CXCR4,MEF2C
Blood	24hrs	Treml4+.Mon	0.000253286	5.70255	0.0471113	Kegg	KEGG_CELL_CYCLE	133	5	CCND3,EP300,GSK3B,STAG1,CDKN1B
Blood	7days	B.Cells	6.81776e-13	28.2132	2.32417e-09	ChemicalGeneticPerturbations	YU_MYC_TARGETS_DN	114	9	CTSH,HLA-DMB,LTB,HLA-DOB,SRPK3,GDI1,MYO7A,MACF1,BTG1
Blood	7days	B.Cells	9.13137e-10	6.64835	3.11288e-06	ChemicalGeneticPerturbations	HSIAO_HOUSEKEEPING_GENES	114	15	ACTG1,TAX1BP1,RPL35,NFKBIA,RPLP1,EEF1A1,RER1,TMSB10,UBA52,HNRNPF,COX7A2,NDUFA4,ALDOA,PTPN6,PLP2
Blood	7days	B.Cells	1.50995e-09	20.8086	5.14741e-06	ChemicalGeneticPerturbations	MORI_LARGE_PRE_BII_LYMPHOCYTE_DN	114	7	CD40,CTSH,HLA-DMB,LTB,MACF1,PTPN6,BTG1
Blood	7days	B.Cells	3.58957e-09	7.98828	1.22368e-05	ChemicalGeneticPerturbations	QI_PLASMACYTOMA_UP	114	12	CD40,NFKBIA,TLN1,LTB,TMSB10,IRF2,CD19,GRB2,DUSP2,PLAC8,PTPN6,BTG1
Blood	7days	B.Cells	1.32862e-08	10.6282	4.52928e-05	ChemicalGeneticPerturbations	PECE_MAMMARY_STEM_CELL_UP	114	9	ACTG1,UBL5,RPLP1,TMSB10,NDUFA6,UBA52,COX7A2,TBCA,SNRPE
Blood	7days	B.Cells	1.72524e-08	45.977	5.88135e-05	ChemicalGeneticPerturbations	HUMMEL_BURKITTS_LYMPHOMA_DN	114	4	CD40,NFKBIA,CTSH,CRIP1
Blood	7days	B.Cells	1.76097e-08	5.39918	6.00316e-05	ChemicalGeneticPerturbations	SPIELMAN_LYMPHOBLAST_EUROPEAN_VS_ASIAN_UP	114	15	ACTG1,UBL5,FKBP3,UQCRQ,LTB,HLA-DOB,NDUFB7,CD19,NDUFA7,HNRNPD,TBCA,GDI1,MACF1,PTPN6,TAOK3
Blood	7days	B.Cells	5.23546e-08	13.41	0.000178477	ChemicalGeneticPerturbations	MORI_MATURE_B_LYMPHOCYTE_UP	114	7	CD40,CTSH,HLA-DMB,HLA-DOB,B4GALNT1,MACF1,PTPN6
Blood	7days	B.Cells	8.68847e-08	4.51493	0.000404275	GObp	GO_MRNA_METABOLIC_PROCESS	114	16	UBL5,RPL35,RBM38,RPLP1,ZFP36L2,UBA52,HNRNPF,CNOT6,HNRNPD,CPEB1,POLR2G,HSPA8,AFF2,DIS3L2,SNRPE,SART3
Blood	7days	B.Cells	1.39813e-07	11.8323	0.000476624	ChemicalGeneticPerturbations	CHAUHAN_RESPONSE_TO_METHOXYESTRADIOL_DN	114	7	EEF1A1,TLN1,TMSB10,ZFP36L2,HERPUD1,PTPN6,BTG1
Blood	7days	B.Cells	2.59057e-07	18.7406	0.000883124	ChemicalGeneticPerturbations	BRACHAT_RESPONSE_TO_CAMPTOTHECIN_DN	114	5	TAX1BP1,FKBP3,SASH3,PLAC8,ALDOA
Blood	7days	B.Cells	4.85768e-06	11.4943	0.000903528	Kegg	KEGG_B_CELL_RECEPTOR_SIGNALING_PATHWAY	114	5	NFKBIA,CD19,GRB2,PTPN6,IKBKB
Blood	7days	B.Cells	2.9557e-07	18.3419	0.0010076	ChemicalGeneticPerturbations	JIANG_AGING_HYPOTHALAMUS_UP	114	5	HBA2,HBA1,COX7A2,TBCA,CLK1
Blood	7days	B.Cells	2.1947e-05	6.03448	0.00109735	Hallmark	HALLMARK_INTERFERON_GAMMA_RESPONSE	114	7	CD40,NFKBIA,MARCH1,IRF2,SAMD9L,PTPN6,BTG1
Blood	7days	B.Cells	3.93846e-07	5.87168	0.00183257	GObp	GO_IMMUNE_RESPONSE_REGULATING_CELL_SURFACE_RECEPTOR_SIGNALING_PATHWAY	114	11	CD40,ACTG1,NFKBIA,UBA52,CD19,IGHM,GRB2,IGKC,TEC,PTPN6,IKBKB
Blood	7days	B.Cells	6.09808e-07	3.56309	0.00207884	ChemicalGeneticPerturbations	GRADE_COLON_CANCER_UP	114	18	ACTG1,ANP32A,RPL35,LRRC58,TMSB10,ARHGDIA,PTP4A3,UBA52,CD19,DDAH1,NDUFA7,HNRNPD,TBCA,NDUFA4,HSPA8,MGAT5,IKBKB,SNRPE
Blood	7days	B.Cells	1.24935e-05	6.52377	0.00232379	Kegg	KEGG_HUNTINGTONS_DISEASE	114	7	UQCRQ,NDUFA6,NDUFB7,COX7A2,NDUFA7,NDUFA4,POLR2G
Blood	7days	B.Cells	1.25325e-05	7.77807	0.00233104	Kegg	KEGG_PARKINSONS_DISEASE	114	6	UQCRQ,NDUFA6,NDUFB7,COX7A2,NDUFA7,NDUFA4
Blood	7days	B.Cells	7.32934e-07	11.8906	0.00249857	ChemicalGeneticPerturbations	MOOTHA_VOXPHOS	114	6	UQCRQ,NDUFA6,NDUFB7,COX7A2,NDUFA7,NDUFA4
Blood	7days	B.Cells	1.38143e-05	7.66284	0.00256946	Kegg	KEGG_OXIDATIVE_PHOSPHORYLATION	114	6	UQCRQ,NDUFA6,NDUFB7,COX7A2,NDUFA7,NDUFA4
Blood	7days	B.Cells	4.14556e-06	11.8092	0.00279411	Reactome	REACTOME_RIG_I_MDA5_MEDIATED_INDUCTION_OF_IFN_ALPHA_BETA_PATHWAYS	114	5	TAX1BP1,NFKBIA,UBA52,IRF2,IKBKB
Blood	7days	B.Cells	6.87856e-07	15.9642	0.00320059	GObp	GO_B_CELL_RECEPTOR_SIGNALING_PATHWAY	114	5	CD19,IGHM,IGKC,TEC,PTPN6
Blood	7days	B.Cells	1.05785e-06	14.8633	0.00360621	ChemicalGeneticPerturbations	KLEIN_PRIMARY_EFFUSION_LYMPHOMA_DN	114	5	CD40,CTSH,HLA-DMB,CD19,PTPN6
Blood	7days	B.Cells	1.06936e-06	21.5517	0.00364545	ChemicalGeneticPerturbations	BAUS_TFF2_TARGETS_UP	114	4	LTB,CRIP1,IGHM,GLO1
Blood	7days	B.Cells	6.5806e-06	10.9123	0.00443533	Reactome	REACTOME_RESPIRATORY_ELECTRON_TRANSPORT	114	5	UQCRQ,NDUFA6,NDUFB7,NDUFA7,NDUFA4
Blood	7days	B.Cells	7.61132e-06	10.6428	0.00513003	Reactome	REACTOME_P75_NTR_RECEPTOR_MEDIATED_SIGNALLING	114	5	NFKBIA,ARHGDIA,ABR,UBA52,IKBKB
Blood	7days	B.Cells	8.79427e-06	8.21018	0.00592734	Reactome	REACTOME_SIGNALING_BY_THE_B_CELL_RECEPTOR_BCR	114	6	NFKBIA,MAPKAP1,UBA52,CD19,GRB2,IKBKB
Blood	7days	B.Cells	9.39943e-06	10.2627	0.00633521	Reactome	REACTOME_REGULATION_OF_MRNA_STABILITY_BY_PROTEINS_THAT_BIND_AU_RICH_ELEMENTS	114	5	ANP32A,UBA52,TNPO1,HNRNPD,HSPA8
Blood	7days	B.Cells	1.50256e-06	8.68271	0.00699141	GObp	GO_REGULATION_OF_RNA_STABILITY	114	7	ANP32A,RBM38,ZFP36L2,UBA52,TNPO1,HNRNPD,HSPA8
Blood	7days	B.Cells	3.95273e-05	7.98212	0.00735208	Kegg	KEGG_T_CELL_RECEPTOR_SIGNALING_PATHWAY	114	5	NFKBIA,GRB2,TEC,PTPN6,IKBKB
Blood	7days	B.Cells	2.28681e-06	13.0617	0.00779573	ChemicalGeneticPerturbations	DIRMEIER_LMP1_RESPONSE_EARLY	114	5	CD40,NFKBIA,EEF1A1,DUSP2,HERPUD1
Blood	7days	B.Cells	0.000167343	5.17241	0.00836714	Hallmark	HALLMARK_OXIDATIVE_PHOSPHORYLATION	114	6	UQCRQ,NDUFA6,NDUFB7,COX7A2,NDUFA7,NDUFA4
Blood	7days	B.Cells	0.000167343	5.17241	0.00836714	Hallmark	HALLMARK_ALLOGRAFT_REJECTION	114	6	CD40,HLA-DMB,LTB,HLA-DOB,PTPN6,IKBKB
Blood	7days	B.Cells	2.53185e-06	8.09998	0.00863106	ChemicalGeneticPerturbations	TSAI_RESPONSE_TO_IONIZING_RADIATION	114	7	NFKBIA,RRM2B,CLK1,MAP7,PTPN6,BTG1,TSC22D3
Blood	7days	B.Cells	2.05483e-06	7.07339	0.00956111	GObp	GO_ANTIGEN_RECEPTOR_MEDIATED_SIGNALING_PATHWAY	114	8	NFKBIA,UBA52,CD19,IGHM,IGKC,TEC,PTPN6,IKBKB
Blood	7days	B.Cells	5.8475e-05	6.1212	0.0108764	Kegg	KEGG_ALZHEIMERS_DISEASE	114	6	UQCRQ,NDUFA6,NDUFB7,COX7A2,NDUFA7,NDUFA4
Blood	7days	B.Cells	6.17708e-05	9.57854	0.0114894	Kegg	KEGG_LEISHMANIA_INFECTION	114	4	NFKBIA,HLA-DMB,HLA-DOB,PTPN6
Blood	7days	B.Cells	6.60079e-05	9.44733	0.0122775	Kegg	KEGG_VIRAL_MYOCARDITIS	114	4	CD40,ACTG1,HLA-DMB,HLA-DOB
Blood	7days	B.Cells	4.14556e-06	11.8092	0.0141322	ChemicalGeneticPerturbations	ADDYA_ERYTHROID_DIFFERENTIATION_BY_HEMIN	114	5	TAX1BP1,HBA1,CTSH,PTP4A3,HERPUD1
Blood	7days	B.Cells	2.26897e-05	4.70219	0.0152929	Reactome	REACTOME_METABOLISM_OF_RNA	114	9	ANP32A,RPL35,RPLP1,UBA52,TNPO1,CNOT6,HNRNPD,HSPA8,SNRPE
Blood	7days	B.Cells	2.27896e-05	8.79662	0.0153602	Reactome	REACTOME_RESPIRATORY_ELECTRON_TRANSPORT_ATP_SYNTHESIS_BY_CHEMIOSMOTIC_COUPLING_AND_HEAT_PRODUCTION_BY_UNCOUPLING_PROTEINS_	114	5	UQCRQ,NDUFA6,NDUFB7,NDUFA7,NDUFA4
Blood	7days	B.Cells	4.85768e-06	11.4943	0.0165598	ChemicalGeneticPerturbations	YAO_TEMPORAL_RESPONSE_TO_PROGESTERONE_CLUSTER_6	114	5	ZFP36L2,IFI27L2,IGHM,TEC,BTG1
Blood	7days	B.Cells	5.28086e-06	5.56174	0.0180024	ChemicalGeneticPerturbations	FORTSCHEGGER_PHF8_TARGETS_UP	114	9	CDC37L1,TNPO1,DDAH1,CNOT6,RIMKLB,DUSP2,MGAT5,HERPUD1,MAP7
Blood	7days	B.Cells	5.40313e-06	7.31452	0.0184193	ChemicalGeneticPerturbations	PASQUALUCCI_LYMPHOMA_BY_GC_STAGE_DN	114	7	SNN,RBM38,TMSB10,CRIP1,SASH3,CD19,BTG1
Blood	7days	B.Cells	4.31318e-06	16.4204	0.0200692	GObp	GO_MITOCHONDRIAL_ELECTRON_TRANSPORT_NADH_TO_UBIQUINONE	114	4	NDUFA6,NDUFB7,NDUFA7,NDUFA4
Blood	7days	B.Cells	4.8484e-06	3.98114	0.0225596	GObp	GO_POSITIVE_REGULATION_OF_IMMUNE_RESPONSE	114	13	CD40,ACTG1,NFKBIA,HLA-DMB,UBA52,SASH3,CD19,IGHM,GRB2,IGKC,TEC,PTPN6,IKBKB
Blood	7days	B.Cells	7.58391e-06	3.42091	0.0258535	ChemicalGeneticPerturbations	KIM_ALL_DISORDERS_OLIGODENDROCYTE_NUMBER_CORR_UP	114	15	ACTG1,CBX7,TAX1BP1,SNN,RPL35,IPCEF1,RPLP1,CTSH,UQCRQ,COX7A2,NDUFA7,GDI1,GLO1,ALDOA,SNRPE
Blood	7days	B.Cells	3.92925e-05	5.56174	0.0264831	Reactome	REACTOME_SIGNALLING_BY_NGF	114	7	NFKBIA,MAPKAP1,ARHGDIA,ABR,UBA52,GRB2,IKBKB
Blood	7days	B.Cells	4.18627e-05	4.85673	0.0282154	Reactome	REACTOME_METABOLISM_OF_MRNA	114	8	ANP32A,RPL35,RPLP1,UBA52,TNPO1,CNOT6,HNRNPD,HSPA8
Blood	7days	B.Cells	9.51643e-06	3.53929	0.0324415	ChemicalGeneticPerturbations	KIM_BIPOLAR_DISORDER_OLIGODENDROCYTE_DENSITY_CORR_UP	114	14	ACTG1,CBX7,TAX1BP1,SNN,RPL35,RPLP1,EEF1A1,UQCRQ,NDUFA6,COX7A2,GDI1,GLO1,ALDOA,SNRPE
Blood	7days	B.Cells	7.10094e-06	6.07626	0.0330407	GObp	GO_RNA_CATABOLIC_PROCESS	114	8	RPL35,RPLP1,ZFP36L2,UBA52,CNOT6,HNRNPD,POLR2G,DIS3L2
Blood	7days	B.Cells	7.35721e-06	6.04961	0.0342331	GObp	GO_NUCLEOSIDE_TRIPHOSPHATE_METABOLIC_PROCESS	114	8	RRM2B,UQCRQ,NDUFA6,NDUFB7,NDUFA7,NDUFA4,HSPA8,ALDOA
Blood	7days	B.Cells	1.06556e-05	6.66794	0.0363248	ChemicalGeneticPerturbations	JISON_SICKLE_CELL_DISEASE_DN	114	7	IPCEF1,RPLP1,EEF1A1,HSPA8,DUSP2,BTG1,TSC22D3
Blood	7days	B.Cells	1.14256e-05	13.5227	0.0389497	ChemicalGeneticPerturbations	BYSTROEM_CORRELATED_WITH_IL5_UP	114	4	RPLP1,CTSH,IKBKB,SART3
Blood	7days	B.Cells	1.14887e-05	4.60999	0.039165	ChemicalGeneticPerturbations	WANG_TUMOR_INVASIVENESS_UP	114	10	ACTG1,FKBP3,HBA1,RPL35,NFKBIA,TMSB10,NDUFB7,COX7A2,HSPA8,PLAC8
Blood	7days	B.Cells	9.11754e-06	3.21518	0.0424239	GObp	GO_REGULATION_OF_IMMUNE_RESPONSE	114	16	CD40,ACTG1,NFKBIA,CTSH,HLA-DMB,ABR,UBA52,SASH3,CD19,IGHM,GRB2,IGKC,CLEC2D,TEC,PTPN6,IKBKB
Blood	7days	B.Cells	9.39943e-06	10.2627	0.0437355	GObp	GO_OXIDATIVE_PHOSPHORYLATION	114	5	UQCRQ,NDUFA6,NDUFB7,NDUFA7,NDUFA4
Blood	7days	B.Cells	1.38295e-05	13.0124	0.0471449	ChemicalGeneticPerturbations	MORI_IMMATURE_B_LYMPHOCYTE_UP	114	4	CD40,HLA-DMB,PTPN6,BTG1
Blood	7days	B.Cells	7.01753e-05	3.51865	0.0472981	Reactome	REACTOME_ADAPTIVE_IMMUNE_SYSTEM	114	11	CD40,NFKBIA,CTSH,HLA-DMB,MAPKAP1,HLA-DOB,UBA52,CD19,GRB2,PTPN6,IKBKB
Blood	7days	CD4T	5.26622e-08	10.8108	0.000179525	ChemicalGeneticPerturbations	LEE_DIFFERENTIATING_T_LYMPHOCYTE	72	8	IPCEF1,LTB,DGKA,CD52,SP110,TRBC1,ITGAL,RASSF5
Blood	7days	CD4T	4.47447e-07	10.1171	0.00152535	ChemicalGeneticPerturbations	TONKS_TARGETS_OF_RUNX1_RUNX1T1_FUSION_HSC_DN	72	7	LTB,S100A4,CD52,SETX,TRBC1,LGALS1,ITGAL
Blood	7days	CD4T	1.8208e-06	19.656	0.0062071	ChemicalGeneticPerturbations	YU_MYC_TARGETS_DN	72	4	LTB,DGKA,KLF3,MACF1
Blood	7days	CD4T	2.00349e-06	13.3797	0.0068299	ChemicalGeneticPerturbations	WIELAND_UP_BY_HBV_INFECTION	72	5	CCL5,COTL1,SP110,TRBC1,SRGN
Blood	7days	CD4T	4.77896e-06	8.95924	0.0162915	ChemicalGeneticPerturbations	JISON_SICKLE_CELL_DISEASE_DN	72	6	COX6C,IPCEF1,EEF1A1,DGKA,NACA,EEF1G
Blood	7days	CD4T	9.10372e-06	14.2248	0.0310346	ChemicalGeneticPerturbations	NAKAYAMA_SOFT_TISSUE_TUMORS_PCA1_UP	72	4	CCL5,S100A4,CD52,TRBC1
Blood	7days	CD4T	9.75455e-06	5.11015	0.0332533	ChemicalGeneticPerturbations	SMID_BREAST_CANCER_NORMAL_LIKE_UP	72	9	CCL5,LTB,ACAP1,COTL1,CD52,SP110,TRBC1,SRGN,ITGAL
Blood	7days	CD4T	0.000876087	5.40541	0.0438044	Hallmark	HALLMARK_ALLOGRAFT_REJECTION	72	4	CCL5,LTB,SRGN,ITGAL
Blood	7days	CD8T	3.85297e-11	6.99229	1.31348e-07	ChemicalGeneticPerturbations	HSIAO_HOUSEKEEPING_GENES	122	17	HINT1,ACTG1,CCR9,UBE2D3,NFKBIA,EEF1A1,UBA52,HNRNPK,EIF4A2,IRAK1,BCLAF1,HSP90AB1,EIF4A1,NACA,EEF1D,SLC25A3,EEF1B2
Blood	7days	CD8T	4.71465e-09	8.8	1.60722e-05	ChemicalGeneticPerturbations	LEE_DIFFERENTIATING_T_LYMPHOCYTE	122	11	LTB,RNASET2,CD52,SRSF7,TMEM71,TRBC1,BCL11B,EIF4A1,TAGAP,CD53,RASSF5
Blood	7days	CD8T	2.70558e-07	27.8261	5.87112e-05	Biocarta	BIOCARTA_MTOR_PATHWAY	122	4	PDPK1,EIF4A2,EIF4A1,EIF4B
Blood	7days	CD8T	1.86498e-08	8.83978	6.35771e-05	ChemicalGeneticPerturbations	JISON_SICKLE_CELL_DISEASE_DN	122	10	EEF1A1,EIF4A2,CCR7,BCLAF1,HSPA8,EIF4A1,NACA,EIF4B,TSC22D3,EEF1B2
Blood	7days	CD8T	4.6991e-06	6.4	0.000234955	Hallmark	HALLMARK_MYC_TARGETS_V1	122	8	SRSF3,SRSF7,HSP90AB1,EIF4A1,TARDBP,SLC25A3,CNBP,EEF1B2
Blood	7days	CD8T	9.40174e-08	5.5615	0.000320505	ChemicalGeneticPerturbations	WANG_TUMOR_INVASIVENESS_UP	122	13	HINT1,ACTG1,ABHD8,SRSF3,HBA1,NFKBIA,TUBA1B,SRSF7,HSPA8,NACA,POU2F3,TARDBP,EIF4B
Blood	7days	CD8T	4.7898e-07	3.34378	0.00163284	ChemicalGeneticPerturbations	LOPEZ_MBD_TARGETS	122	20	FBXW2,UBE2D3,FKBP8,NFKBIA,WDR89,UBA52,PUF60,TBCA,IRAK1,TMEM50A,PPP1CA,HSPA8,ZFP91,EIF4A1,UBE2D2,EEF1D,ARL6IP4,EIF4B,CNBP,CD53
Blood	7days	CD8T	9.26624e-07	22.069	0.00315886	ChemicalGeneticPerturbations	LANG_MYB_FAMILY_TARGETS	122	4	SLC20A1,HSPA8,SLC25A3,CD53
Blood	7days	CD8T	1.96323e-06	3.30654	0.00669265	ChemicalGeneticPerturbations	GRADE_COLON_CANCER_UP	122	18	ACTG1,UBE2D3,FKBP8,HPCAL1,TEX264,TULP4,LRRC58,UBA52,PTK2,PNPLA7,AP1M1,TUBA1B,TBCA,IRAK1,LAPTM4B,HSPA8,EIF4A1,EEF1D
Blood	7days	CD8T	2.11757e-06	18.8235	0.0072188	ChemicalGeneticPerturbations	LUI_TARGETS_OF_PAX8_PPARG_FUSION	122	4	HINT1,SRSF3,HSP90AB1,HSPA8
Blood	7days	CD8T	4.85962e-06	16	0.0165665	ChemicalGeneticPerturbations	TOMLINS_PROSTATE_CANCER_UP	122	4	CACNA1D,BICD1,EIF4A1,NACA
Blood	7days	CD8T	5.50699e-06	15.6098	0.0187733	ChemicalGeneticPerturbations	FLECHNER_PBL_KIDNEY_TRANSPLANT_OK_VS_DONOR_DN	122	4	USP7,BCLAF1,CD53,DNAJB6
Blood	7days	CD8T	3.28109e-05	8.24742	0.0221146	Reactome	REACTOME_DOWNSTREAM_SIGNALING_EVENTS_OF_B_CELL_RECEPTOR_BCR	122	5	NFKBIA,PDPK1,MAPKAP1,UBA52,PSMD13
Blood	7days	CD8T	5.97423e-06	6.21359	0.0277981	GObp	GO_FC_RECEPTOR_SIGNALING_PATHWAY	122	8	ACTG1,NFKBIA,PDPK1,UBA52,PTK2,PSMD13,HSP90AB1,UBE2D2
Blood	7days	CD8T	0.00015386	6.25	0.0286181	Kegg	KEGG_SPLICEOSOME	122	5	SRSF3,HNRNPK,PUF60,SRSF7,HSPA8
Blood	7days	CD8T	8.80058e-06	14.2222	0.0300012	ChemicalGeneticPerturbations	LUI_THYROID_CANCER_PAX8_PPARG_DN	122	4	HINT1,SRSF3,HSP90AB1,HSPA8
Blood	7days	CD8T	8.80058e-06	14.2222	0.0300012	ChemicalGeneticPerturbations	ZHAN_V2_LATE_DIFFERENTIATION_GENES	122	4	EIF4A2,IRAK1,SRSF7,EIF4B
Blood	7days	CD8T	8.80058e-06	14.2222	0.0300012	ChemicalGeneticPerturbations	LEE_AGING_MUSCLE_UP	122	4	HINT1,HBA2,EIF4A2,HSPA8
Blood	7days	CD8T	6.47033e-06	3.66612	0.0301065	GObp	GO_MRNA_METABOLIC_PROCESS	122	14	SRSF3,LUC7L,UBA52,HNRNPK,PUF60,EIF4A2,SRSF7,PTCD2,HSPA8,EIF4A1,TARDBP,ARL6IP4,EIF4B,DIS3L2
Blood	7days	CD8T	1.09395e-05	13.617	0.0372928	ChemicalGeneticPerturbations	JIANG_AGING_HYPOTHALAMUS_UP	122	4	HBA2,HBA1,TBCA,MAP4
Blood	7days	GRAN	2.71843e-08	40.404	9.26712e-05	ChemicalGeneticPerturbations	BROWN_MYELOID_CELL_DEVELOPMENT_UP	12	4	CAP1,SLFN12,SLFN12L,FCGR2A
Blood	7days	GRAN	2.33923e-07	26.2467	0.000797442	ChemicalGeneticPerturbations	MCLACHLAN_DENTAL_CARIES_UP	12	4	G0S2,FCGR2A,FCGR2C,FCGR2B
Blood	7days	GRAN	3.17479e-06	5.88038	0.0147723	GObp	GO_IMMUNE_SYSTEM_PROCESS	12	7	CSF3R,UBA52,IL16,SLC16A3,FCGR2A,FCGR2C,FCGR2B
Blood	7days	GRAN	1.06078e-05	12.0773	0.036162	ChemicalGeneticPerturbations	GRAESSMANN_APOPTOSIS_BY_SERUM_DEPRIVATION_UP	12	4	UBA52,SLFN12,SLFN12L,PFDN5
Blood	7days	Ly6c+.Mon	1.30147e-11	9.59726	4.4367e-08	ChemicalGeneticPerturbations	HSIAO_HOUSEKEEPING_GENES	73	14	EIF3F,CSTB,VIM,NFKBIA,EEF1A1,HLA-DQB1,OAZ1,COX7C,EIF4A2,DUSP1,LGALS3,ITGB1,TAGLN2,PLP2
Blood	7days	Ly6c+.Mon	9.49529e-09	22.2222	1.76612e-06	Kegg	KEGG_LEISHMANIA_INFECTION	73	6	FOS,NFKBIA,HLA-DQB1,JUN,ITGB1,ITGA4
Blood	7days	Ly6c+.Mon	1.45382e-08	8.91862	4.95607e-05	ChemicalGeneticPerturbations	WALLACE_PROSTATE_CANCER_RACE_UP	73	10	LSP1,HLA-DQB1,CD37,IRF9,RAC2,PTPRC,PLAC8,SELL,LYZ,ITGA4
Blood	7days	Ly6c+.Mon	1.64508e-08	29.6296	5.60807e-05	ChemicalGeneticPerturbations	MCDOWELL_ACUTE_LUNG_INJURY_UP	73	5	FOS,CSTB,NFKBIA,MCL1,DUSP1
Blood	7days	Ly6c+.Mon	2.60378e-08	44.4444	8.87629e-05	ChemicalGeneticPerturbations	GOLUB_ALL_VS_AML_DN	73	4	NFKBIA,MCL1,LGALS3,LYZ
Blood	7days	Ly6c+.Mon	3.674e-08	9.44882	0.000125247	ChemicalGeneticPerturbations	MCLACHLAN_DENTAL_CARIES_UP	73	9	LSP1,HLA-DQB1,CD37,RAC2,PTPRC,MCL1,LCP1,PLAC8,LYZ
Blood	7days	Ly6c+.Mon	7.03346e-07	11.9403	0.000130822	Kegg	KEGG_CELL_ADHESION_MOLECULES_CAMS	73	6	HLA-DQB1,VCAN,PTPRC,SELL,ITGB1,ITGA4
Blood	7days	Ly6c+.Mon	1.20515e-07	33.3333	0.000410835	ChemicalGeneticPerturbations	AMIT_SERUM_RESPONSE_40_MCF10A	73	4	FOS,MCL1,DUSP1,JUN
Blood	7days	Ly6c+.Mon	1.30112e-07	21.164	0.000443551	ChemicalGeneticPerturbations	PHONG_TNF_TARGETS_UP	73	5	FOS,NFKBIA,MCL1,DUSP1,JUN
Blood	7days	Ly6c+.Mon	1.72451e-07	20.202	0.000587887	ChemicalGeneticPerturbations	DIRMEIER_LMP1_RESPONSE_EARLY	73	5	NFKBIA,EEF1A1,MCL1,LCP1,JUN
Blood	7days	Ly6c+.Mon	1.92585e-07	30.4762	0.000656522	ChemicalGeneticPerturbations	HAN_JNK_SINGALING_UP	73	4	IFI27L2,IRF9,DUSP1,JUN
Blood	7days	Ly6c+.Mon	2.46652e-07	6.02327	0.000840835	ChemicalGeneticPerturbations	RODWELL_AGING_KIDNEY_UP	73	11	IRAK2,VIM,HLA-DQB1,VCAN,ACER3,IRF9,RAC2,PTPRC,FN1,LYZ,TAGLN2
Blood	7days	Ly6c+.Mon	2.51955e-07	9.00141	0.000858913	ChemicalGeneticPerturbations	HOSHIDA_LIVER_CANCER_SUBCLASS_S1	73	8	LSP1,HLA-DQB1,CD37,VCAN,OAZ1,PTPRC,LCP1,PLP2
Blood	7days	Ly6c+.Mon	3.68057e-07	3.74656	0.00125471	ChemicalGeneticPerturbations	CHEN_METABOLIC_SYNDROM_NETWORK	73	17	FOS,CSTB,VIM,PLXDC2,CD37,VCAN,ACER3,IFI27L2,RAC2,PTPRC,MCL1,LGALS3,LCP1,PLAC8,BATF3,JUN,TAGLN2
Blood	7days	Ly6c+.Mon	4.35598e-07	17.316	0.00148495	ChemicalGeneticPerturbations	HESS_TARGETS_OF_HOXA9_AND_MEIS1_DN	73	5	FOS,LSP1,VCAN,MCL1,DUSP1
Blood	7days	Ly6c+.Mon	4.39423e-07	10.1449	0.00149799	ChemicalGeneticPerturbations	WU_CELL_MIGRATION	73	7	CSTB,VIM,VCAN,RAC2,FN1,LGALS3,PLAC8
Blood	7days	Ly6c+.Mon	3.15529e-05	8.28157	0.00157765	Hallmark	HALLMARK_APOPTOSIS	73	5	BNIP3L,MCL1,GSTM1,LGALS3,JUN
Blood	7days	Ly6c+.Mon	9.11189e-06	14.2222	0.00169481	Kegg	KEGG_B_CELL_RECEPTOR_SIGNALING_PATHWAY	73	4	FOS,NFKBIA,RAC2,JUN
Blood	7days	Ly6c+.Mon	5.08073e-07	3.86824	0.00173202	ChemicalGeneticPerturbations	DANG_BOUND_BY_MYC	73	16	HBA2,LSP1,ARPP19,CSTB,HBA1,HSPA4,OAZ1,MAGOH,COX7C,IRF9,RAC2,MCL1,TCIRG1,ITGB1,TAGLN2,TOP1
Blood	7days	Ly6c+.Mon	5.89245e-07	16.4609	0.00200873	ChemicalGeneticPerturbations	MUNSHI_MULTIPLE_MYELOMA_UP	73	5	FOS,NFKBIA,EEF1A1,MCL1,JUN
Blood	7days	Ly6c+.Mon	6.81262e-07	16.0643	0.00232242	ChemicalGeneticPerturbations	ODONNELL_TARGETS_OF_MYC_AND_TFRC_UP	73	5	HLA-DQB1,CD37,LYZ,JUN,YPEL5
Blood	7days	Ly6c+.Mon	7.45151e-06	14.8148	0.00502232	Reactome	REACTOME_NFKB_AND_MAP_KINASES_ACTIVATION_MEDIATED_BY_TLR4_SIGNALING_REPERTOIRE	73	4	FOS,IRAK2,NFKBIA,JUN
Blood	7days	Ly6c+.Mon	0.000105278	6.66667	0.0052639	Hallmark	HALLMARK_TNFA_SIGNALING_VIA_NFKB	73	5	FOS,NFKBIA,MCL1,DUSP1,JUN
Blood	7days	Ly6c+.Mon	0.000105278	6.66667	0.0052639	Hallmark	HALLMARK_HYPOXIA	73	5	FOS,BNIP3L,DUSP1,PLAC8,JUN
Blood	7days	Ly6c+.Mon	0.000105278	6.66667	0.0052639	Hallmark	HALLMARK_EPITHELIAL_MESENCHYMAL_TRANSITION	73	5	VIM,VCAN,FN1,JUN,ITGB1
Blood	7days	Ly6c+.Mon	8.52924e-06	14.4144	0.00574871	Reactome	REACTOME_TRIF_MEDIATED_TLR3_SIGNALING	73	4	FOS,IRAK2,NFKBIA,JUN
Blood	7days	Ly6c+.Mon	1.77498e-06	19.7531	0.00605091	ChemicalGeneticPerturbations	ZHOU_TNF_SIGNALING_4HR	73	4	NFKBIA,OAZ1,ITGB1,PLP2
Blood	7days	Ly6c+.Mon	1.77498e-06	19.7531	0.00605091	ChemicalGeneticPerturbations	ZHOU_TNF_SIGNALING_30MIN	73	4	NFKBIA,DUSP1,TAGLN2,PLP2
Blood	7days	Ly6c+.Mon	1.92899e-06	13.468	0.00657594	ChemicalGeneticPerturbations	CROONQUIST_NRAS_VS_STROMAL_STIMULATION_DN	73	5	FOS,NFKBIA,VCAN,DUSP1,JUN
Blood	7days	Ly6c+.Mon	1.9468e-06	19.3939	0.00663663	ChemicalGeneticPerturbations	YU_MYC_TARGETS_DN	73	4	HLA-DQB1,CD37,PTPRC,MYO7A
Blood	7days	Ly6c+.Mon	1.98993e-06	6.12245	0.00678368	ChemicalGeneticPerturbations	LINDGREN_BLADDER_CANCER_CLUSTER_2B	73	9	NFKBIA,HLA-DQB1,STXBP6,RAC2,LCP1,SELL,LYZ,JUN,ITGA4
Blood	7days	Ly6c+.Mon	1.03703e-05	13.8528	0.00698959	Reactome	REACTOME_TRAF6_MEDIATED_INDUCTION_OF_NFKB_AND_MAP_KINASES_UPON_TLR7_8_OR_9_ACTIVATION	73	4	FOS,IRAK2,NFKBIA,JUN
Blood	7days	Ly6c+.Mon	2.06693e-06	8.25959	0.00704616	ChemicalGeneticPerturbations	MARKEY_RB1_ACUTE_LOF_DN	73	7	BNIP3L,IFI27L2,IRF9,RAC2,PTPRC,LCP1,PLAC8
Blood	7days	Ly6c+.Mon	2.13144e-06	19.0476	0.00726606	ChemicalGeneticPerturbations	KYNG_ENVIRONMENTAL_STRESS_RESPONSE_UP	73	4	BNIP3L,VIM,OAZ1,FN1
Blood	7days	Ly6c+.Mon	2.16886e-06	13.2013	0.00739366	ChemicalGeneticPerturbations	WIELAND_UP_BY_HBV_INFECTION	73	5	HLA-DQB1,RAC2,LGALS3,PLAC8,LYZ
Blood	7days	Ly6c+.Mon	2.29762e-06	13.0719	0.00783257	ChemicalGeneticPerturbations	CHAUHAN_RESPONSE_TO_METHOXYESTRADIOL_DN	73	5	LSP1,EIF3F,VIM,EEF1A1,MCL1
Blood	7days	Ly6c+.Mon	2.54193e-06	18.3908	0.00866544	ChemicalGeneticPerturbations	NAGASHIMA_EGF_SIGNALING_UP	73	4	FOS,MCL1,DUSP1,JUN
Blood	7days	Ly6c+.Mon	2.54193e-06	18.3908	0.00866544	ChemicalGeneticPerturbations	JOHANSSON_GLIOMAGENESIS_BY_PDGFB_UP	73	4	FOS,EEF1A1,FN1,TAGLN2
Blood	7days	Ly6c+.Mon	2.54193e-06	18.3908	0.00866544	ChemicalGeneticPerturbations	JI_RESPONSE_TO_FSH_DN	73	4	VCAN,FN1,DUSP1,TOP1
Blood	7days	Ly6c+.Mon	5.34592e-05	9.87654	0.00994342	Kegg	KEGG_T_CELL_RECEPTOR_SIGNALING_PATHWAY	73	4	FOS,NFKBIA,PTPRC,JUN
Blood	7days	Ly6c+.Mon	1.49754e-05	12.8514	0.0100934	Reactome	REACTOME_MYD88_MAL_CASCADE_INITIATED_ON_PLASMA_MEMBRANE	73	4	FOS,IRAK2,NFKBIA,JUN
Blood	7days	Ly6c+.Mon	3.01216e-06	17.7778	0.0102685	ChemicalGeneticPerturbations	CROONQUIST_STROMAL_STIMULATION_UP	73	4	FOS,NFKBIA,VCAN,DUSP1
Blood	7days	Ly6c+.Mon	3.27156e-06	17.4863	0.0111527	ChemicalGeneticPerturbations	NADLER_OBESITY_UP	73	4	CTSA,CSTB,DUSP1,LGALS3
Blood	7days	Ly6c+.Mon	3.43449e-06	7.7135	0.0117082	ChemicalGeneticPerturbations	WINTER_HYPOXIA_METAGENE	73	7	FOS,BNIP3L,VIM,HLA-DQB1,FN1,BATF3,JUN
Blood	7days	Ly6c+.Mon	3.54818e-06	17.2043	0.0120957	ChemicalGeneticPerturbations	LEE_LIVER_CANCER_E2F1_UP	73	4	CSTB,MCL1,GSTM1,TAGLN2
Blood	7days	Ly6c+.Mon	4.52815e-06	5.5814	0.0154365	ChemicalGeneticPerturbations	JOHNSTONE_PARVB_TARGETS_3_UP	73	9	CTSA,CSTB,IRAK2,VIM,NFKBIA,GLS,TCIRG1,FN1,NAV1
Blood	7days	Ly6c+.Mon	4.76722e-06	7.37813	0.0162514	ChemicalGeneticPerturbations	DANG_REGULATED_BY_MYC_DN	73	7	CSTB,TRIP12,FN1,DUSP1,PLAC8,LYZ,ITGB1
Blood	7days	Ly6c+.Mon	2.60366e-05	11.4695	0.0175487	Reactome	REACTOME_ACTIVATED_TLR4_SIGNALLING	73	4	FOS,IRAK2,NFKBIA,JUN
Blood	7days	Ly6c+.Mon	5.42407e-06	8.79121	0.0184906	ChemicalGeneticPerturbations	FERNANDEZ_BOUND_BY_MYC	73	6	CSTB,MCL1,TCIRG1,JUN,ITGB1,TOP1
Blood	7days	Ly6c+.Mon	5.61668e-06	15.6863	0.0191473	ChemicalGeneticPerturbations	AKL_HTLV1_INFECTION_DN	73	4	CTSA,JUN,ITGB1,YPEL5
Blood	7days	Ly6c+.Mon	5.66307e-06	7.20721	0.0193054	ChemicalGeneticPerturbations	QI_PLASMACYTOMA_UP	73	7	LSP1,NFKBIA,CD37,RAC2,LCP1,PLAC8,ITGB1
Blood	7days	Ly6c+.Mon	5.75582e-06	6.1657	0.0196216	ChemicalGeneticPerturbations	GOLDRATH_ANTIGEN_RESPONSE	73	8	HBA2,HLA-DQB1,DUSP1,LGALS3,BATF3,ITGB1,ITGA4,PLP2
Blood	7days	Ly6c+.Mon	0.000108198	6.6335	0.0201248	Kegg	KEGG_FOCAL_ADHESION	73	5	RAC2,FN1,JUN,ITGB1,ITGA4
Blood	7days	Ly6c+.Mon	6.03787e-06	15.4589	0.0205831	ChemicalGeneticPerturbations	GOTZMANN_EPITHELIAL_TO_MESENCHYMAL_TRANSITION_UP	73	4	FN1,JUN,ITGB1,TOP1
Blood	7days	Ly6c+.Mon	7.72923e-06	5.25164	0.0263489	ChemicalGeneticPerturbations	SENESE_HDAC1_TARGETS_UP	73	9	USP32,IRAK2,NFKBIA,RAC2,MCL1,FN1,LCP1,ITGB1,TOP1
Blood	7days	Ly6c+.Mon	3.9284e-05	3.4298	0.0264774	Reactome	REACTOME_IMMUNE_SYSTEM	73	12	FOS,CTSA,IRAK2,NFKBIA,TRIP12,IRF9,PTPRC,EIF4A2,LGALS3,SELL,JUN,ITGB1
Blood	7days	Ly6c+.Mon	8.19714e-06	4.30108	0.027944	ChemicalGeneticPerturbations	FEVR_CTNNB1_TARGETS_UP	73	11	FOS,SLC1A1,HLA-DQB2,ACER3,IFI27L2,MCL1,MYO7A,FN1,DUSP1,LGALS3,JUN
Blood	7days	Ly6c+.Mon	0.000153723	7.90123	0.0285926	Kegg	KEGG_OXIDATIVE_PHOSPHORYLATION	73	4	UQCRFS1,COX7C,NDUFA3,TCIRG1
Blood	7days	Ly6c+.Mon	8.52468e-06	8.20513	0.0290606	ChemicalGeneticPerturbations	KYNG_DNA_DAMAGE_DN	73	6	BNIP3L,VIM,OAZ1,FN1,RAB11B,ITGB1
Blood	7days	Ly6c+.Mon	9.95255e-06	4.60564	0.0339282	ChemicalGeneticPerturbations	FULCHER_INFLAMMATORY_RESPONSE_LECTIN_VS_LPS_UP	73	10	LSP1,PTS,ACER3,GLS,RAC2,FN1,BATF3,JUN,TAGLN2,YPEL5
Blood	7days	Ly6c+.Mon	7.44456e-06	8.37696	0.0346396	GObp	GO_RESPONSE_TO_REACTIVE_OXYGEN_SPECIES	73	6	HBA2,FOS,HBA1,FN1,DUSP1,JUN
Blood	7days	Ly6c+.Mon	1.07489e-05	5.7041	0.036643	ChemicalGeneticPerturbations	WANG_TUMOR_INVASIVENESS_UP	73	8	ARPP19,HBA1,VIM,SCAF8,NFKBIA,HSPA4,FN1,PLAC8
Blood	7days	Ly6c+.Mon	1.17606e-05	13.5021	0.0400919	ChemicalGeneticPerturbations	TOOKER_GEMCITABINE_RESISTANCE_UP	73	4	EIF3F,HSPA4,IRF9,LGALS3
Blood	7days	Ly6c+.Mon	1.22741e-05	6.48148	0.0418425	ChemicalGeneticPerturbations	POOLA_INVASIVE_BREAST_CANCER_UP	73	7	VCAN,PTPRC,FN1,PLAC8,SELL,LYZ,ITGA4
Blood	7days	Ly6c+.Mon	0.000228573	4.87805	0.0425147	Kegg	KEGG_PATHWAYS_IN_CANCER	73	6	FOS,NFKBIA,RAC2,FN1,JUN,ITGB1
Blood	7days	Ly6c+.Mon	1.32923e-05	13.1687	0.0453134	ChemicalGeneticPerturbations	HARRIS_HYPOXIA	73	4	FOS,BNIP3L,VIM,JUN
Blood	7days	Ly6c+.Mon	0.000931145	5.33333	0.0465573	Hallmark	HALLMARK_APICAL_JUNCTION	73	4	VCAN,RAC2,PTPRC,ITGB1
Blood	7days	Ly6c+.Mon	0.000931145	5.33333	0.0465573	Hallmark	HALLMARK_OXIDATIVE_PHOSPHORYLATION	73	4	UQCRFS1,COX7C,NDUFA3,TCIRG1
Blood	7days	Ly6c+.Mon	1.04352e-05	3.24939	0.0485551	GObp	GO_DEFENSE_RESPONSE	73	15	FOS,LSP1,BNIP3L,IRAK2,HLA-DQB1,HLA-DQB2,ALPK1,IRF9,PTPRC,TCIRG1,FN1,LGALS3,PLAC8,LYZ,ITGB1
Blood	7days	MEGK	3.53787e-07	16.0668	0.00120606	ChemicalGeneticPerturbations	HSIAO_HOUSEKEEPING_GENES	16	5	PFN1,LAMP1,FUS,TAGLN2,ATP6V1F
Blood	7days	NK.Cells	6.16337e-09	3.51481	2.10109e-05	ChemicalGeneticPerturbations	BLALOCK_ALZHEIMERS_DISEASE_DN	113	25	MAPK10,UQCRC1,SEC13,MRPS28,TXN,CAPNS1,COX5B,CYC1,SNTG1,MLF2,SLC1A1,SRP72,PRDX2,HSP90AA1,CHMP2A,CDKN2D,PCCA,EIF3K,B4GALNT1,ORC5,RCHY1,UBC,CCT2,RAB7A,TOP1
Blood	7days	NK.Cells	6.75102e-09	6.25908	2.30142e-05	ChemicalGeneticPerturbations	HSIAO_HOUSEKEEPING_GENES	113	14	TAX1BP1,TXN,CAPNS1,MLF2,LAMP1,EEF1A1,EIF4A2,HSP90AA1,H2AFZ,FLNA,CLIC1,EIF1,UBC,CHKB
Blood	7days	NK.Cells	3.41319e-08	14.1557	0.000116356	ChemicalGeneticPerturbations	TAKAO_RESPONSE_TO_UVB_RADIATION_UP	113	7	SEC13,TXN,COX5B,PRDX2,IER2,H2AFZ,UBC
Blood	7days	NK.Cells	1.30717e-07	11.9352	0.000445614	ChemicalGeneticPerturbations	CHAUHAN_RESPONSE_TO_METHOXYESTRADIOL_DN	113	7	CAPNS1,EEF1A1,H2AFZ,HCLS1,EIF3K,TRBC1,UBC
Blood	7days	NK.Cells	2.14984e-07	19.3237	0.000732882	ChemicalGeneticPerturbations	GRADE_METASTASIS_DN	113	5	UQCRC1,EIF3I,PRDX2,H2AFZ,CLIC1
Blood	7days	NK.Cells	2.34792e-07	3.0202	0.000800407	ChemicalGeneticPerturbations	DIAZ_CHRONIC_MEYLOGENOUS_LEUKEMIA_UP	113	24	TAX1BP1,UQCRC1,EIF3I,UBE2G2,ATP6V1B2,TXN,HMG20B,CAPNS1,CYC1,MLF2,SRP72,EIF2S2,HADHB,CERS2,PCCA,FLNA,MAP2K2,PTPRC,ORC5,MED21,DUSP11,CCT2,ITGA4,TOP1
Blood	7days	NK.Cells	6.91122e-07	11.994	0.00235603	ChemicalGeneticPerturbations	FLECHNER_BIOPSY_KIDNEY_TRANSPLANT_REJECTED_VS_OK_UP	113	6	CCL5,HCLS1,PTPRC,TRBC1,CORO1A,UBC
Blood	7days	NK.Cells	2.25539e-06	8.22562	0.00768862	ChemicalGeneticPerturbations	WHITFIELD_CELL_CYCLE_M_G1	113	7	HMG20B,MSL1,TULP4,KIF5B,MTPN,LARP7,TOP1
Blood	7days	NK.Cells	3.65826e-06	16.9671	0.0170219	GObp	GO_RECEPTOR_CLUSTERING	113	4	GPHN,ITGAL,FLNA,ITGA4
Blood	7days	NK.Cells	5.59602e-06	3.06305	0.0190768	ChemicalGeneticPerturbations	MARSON_BOUND_BY_FOXP3_STIMULATED	113	18	DDX39A,MRPS28,UBE2G2,TXN,LRRC58,LRP10,HADHB,CERS2,H2AFZ,ITGAL,HCLS1,CLIC1,PTPRC,PSMD4,ORC5,KIF5B,RCHY1,TMEM164
Blood	7days	NK.Cells	0.000120085	6.53808	0.0223357	Kegg	KEGG_PARKINSONS_DISEASE	113	5	UQCRC1,UBE2G2,COX5B,CYC1,SLC25A4
Blood	7days	NK.Cells	8.49036e-06	6.87792	0.0289436	ChemicalGeneticPerturbations	HAHTOLA_MYCOSIS_FUNGOIDES_SKIN_UP	113	7	LAMP1,TRIM2,CERS2,FLNA,ORC5,EIF1,SP3
Blood	7days	NK.Cells	4.40321e-05	3.69313	0.0296777	Reactome	REACTOME_METABOLISM_OF_PROTEINS	113	11	EIF3I,SEC13,CYC1,EEF1A1,SRP72,EIF2S2,EIF4A2,EIF3K,SLC25A4,TUBA1C,CCT2
Blood	7days	NK.Cells	7.77614e-06	10.6045	0.0361824	GObp	GO_REGULATION_OF_TRANSLATIONAL_INITIATION	113	5	EIF3I,CCL5,EIF4A2,EIF3K,EIF1
Blood	7days	NK.Cells	1.06625e-05	5.13186	0.0363485	ChemicalGeneticPerturbations	BORCZUK_MALIGNANT_MESOTHELIOMA_UP	113	9	EIF3I,MAPKAP1,H2AFZ,CHTOP,FLNA,KIF5B,MED21,CCT2,EMG1
Blood	7days	NK.Cells	0.00025408	4.83092	0.0472589	Kegg	KEGG_REGULATION_OF_ACTIN_CYTOSKELETON	113	6	ITGA9,ITGAL,ITGAX,MAP2K2,FGFR2,ITGA4
Blood	7days	Treml4+.Mon	6.83352e-10	32.0513	1.27103e-07	Kegg	KEGG_LEISHMANIA_INFECTION	50	6	FOS,IL1B,ITGAM,FCGR3A,FCGR3B,JUN
Blood	7days	Treml4+.Mon	1.28785e-05	9.61538	0.000643924	Hallmark	HALLMARK_TNFA_SIGNALING_VIA_NFKB	50	5	CDKN1A,FOS,IL1B,DUSP1,JUN
Blood	7days	Treml4+.Mon	2.3112e-07	29.5858	0.000787889	ChemicalGeneticPerturbations	DUNNE_TARGETS_OF_AML1_MTG8_FUSION_UP	50	4	RNASE3,RNASE2,NFE2,LYZ
Blood	7days	Treml4+.Mon	7.73239e-07	23.31	0.00263597	ChemicalGeneticPerturbations	TENEDINI_MEGAKARYOCYTE_MARKERS	50	4	FOS,IL1B,NFE2,JUN
Blood	7days	Treml4+.Mon	6.03775e-07	12.0822	0.00280936	GObp	GO_RESPONSE_TO_REACTIVE_OXYGEN_SPECIES	50	6	HBA2,FOS,HBA1,IL1B,DUSP1,JUN
Blood	7days	Treml4+.Mon	1.78413e-06	19.7239	0.00608211	ChemicalGeneticPerturbations	ROSS_AML_WITH_MLL_FUSIONS	50	4	SRGN,RNASE3,RNASE2,RNH1
Blood	7days	Treml4+.Mon	2.15264e-06	18.9934	0.00733835	ChemicalGeneticPerturbations	HARRIS_HYPOXIA	50	4	FLT1,CDKN1A,FOS,JUN
Blood	7days	Treml4+.Mon	2.2797e-06	9.90426	0.0077715	ChemicalGeneticPerturbations	OSWALD_HEMATOPOIETIC_STEM_CELL_IN_COLLAGEN_GEL_UP	50	6	CDKN1A,FOS,LUC7L3,IL1B,DUSP1,JUN
Blood	7days	Treml4+.Mon	0.000168785	7.69231	0.00843924	Hallmark	HALLMARK_HYPOXIA	50	4	CDKN1A,FOS,DUSP1,JUN
Blood	7days	Treml4+.Mon	6.51059e-05	7.20254	0.0121097	Kegg	KEGG_MAPK_SIGNALING_PATHWAY	50	5	FOS,IL1B,RAF1,DUSP1,JUN
Blood	7days	Treml4+.Mon	3.79296e-06	6.37044	0.0129302	ChemicalGeneticPerturbations	DACOSTA_UV_RESPONSE_VIA_ERCC3_COMMON_DN	50	8	HEG1,RBM6,MED13L,RBMS1,PIP4K2A,DUSP1,OGT,JUN
Blood	7days	Treml4+.Mon	3.85084e-06	11.8708	0.0131275	ChemicalGeneticPerturbations	PETROVA_ENDOTHELIUM_LYMPHATIC_VS_BLOOD_DN	50	5	FLT1,CDKN1A,SLC1A1,SRGN,JUN
Blood	7days	Treml4+.Mon	2.85077e-06	9.57549	0.0132646	GObp	GO_RESPONSE_TO_TOXIC_SUBSTANCE	50	6	HBA2,CDKN1A,FOS,HBA1,IL1B,OGT
Blood	7days	Treml4+.Mon	6.39924e-06	15.2323	0.021815	ChemicalGeneticPerturbations	WIELAND_UP_BY_HBV_INFECTION	50	4	SRGN,CFL1,COTL1,LYZ
Blood	7days	Treml4+.Mon	6.41102e-06	10.8648	0.0218552	ChemicalGeneticPerturbations	CASORELLI_ACUTE_PROMYELOCYTIC_LEUKEMIA_UP	50	5	FOS,MED13L,RBMS1,DUSP1,JUN
Blood	7days	Treml4+.Mon	8.02226e-06	6.76459	0.0273479	ChemicalGeneticPerturbations	TARTE_PLASMA_CELL_VS_PLASMABLAST_UP	50	7	FLT1,FOS,RNASE3,DUSP1,FCGR3B,JUN,LYZ
Blood	7days	Treml4+.Mon	8.10753e-06	14.5138	0.0276386	ChemicalGeneticPerturbations	KEEN_RESPONSE_TO_ROSIGLITAZONE_DN	50	4	SRGN,IL1B,DUSP1,GMFG
Blood	7days	Treml4+.Mon	9.45072e-06	3.81437	0.0322175	ChemicalGeneticPerturbations	CHEN_METABOLIC_SYNDROM_NETWORK	50	12	FOS,SRGN,CERS5,CFL1,PIP4K2A,RNH1,COTL1,SUSD3,LAT2,FCGR3A,JUN,GMFG
Blood	7days	Treml4+.Mon	1.16146e-05	5.54401	0.039594	ChemicalGeneticPerturbations	FLECHNER_BIOPSY_KIDNEY_TRANSPLANT_OK_VS_DONOR_UP	50	8	SNRPD3,SLC1A1,LUC7L3,SRGN,DDX3X,OGT,CNBP,LYZ
Blood	7days	Treml4+.Mon	9.05421e-06	3.16817	0.0421293	GObp	GO_RESPONSE_TO_EXTERNAL_STIMULUS	50	15	FLT1,CDKN1A,FOS,IL1B,RAF1,COX4I1,RNASE3,RNASE2,DDX3X,CFL1,COTL1,OGT,FCGR3B,JUN,LYZ
Blood	7days	Treml4+.Mon	9.29182e-06	14.1143	0.0432349	GObp	GO_RESPONSE_TO_HYDROGEN_PEROXIDE	50	4	HBA2,HBA1,DUSP1,JUN
Blood	7days	Treml4+.Mon	9.38219e-06	7.98509	0.0436553	GObp	GO_APOPTOTIC_SIGNALING_PATHWAY	50	6	CDKN1A,SRGN,IL1B,RAF1,DDX3X,JUN
Blood	7days	Treml4+.Mon	0.000241271	7.12251	0.0448764	Kegg	KEGG_REGULATION_OF_ACTIN_CYTOSKELETON	50	4	RAF1,ITGAM,CFL1,PIP4K2A
Blood	7days	Treml4+.Mon	1.38805e-05	7.51691	0.0473187	ChemicalGeneticPerturbations	LI_INDUCED_T_TO_NATURAL_KILLER_UP	50	6	CDKN1A,RBMS1,MYL6,COTL1,SUSD3,LAT2
Cortex	24hrs	aMG	2.84054e-43	7.00261	9.68341e-40	ChemicalGeneticPerturbations	HSIAO_HOUSEKEEPING_GENES	548	76	CD81,ARL6IP1,CSTB,H3F3B,EEF1A1,ERH,ACTG1,HSP90AB1,YWHAB,HINT1,JUNB,HMGN2,PFN1,CFL1,MT2A,EIF4A1,ARPC2,COX7A2,C1QBP,PSMD8,PSME1,NCL,H2AFZ,COX6B1,HDAC1,SSB,TUBB,ZFP36,SSR2,OAZ1,NEDD8,LDHA,CYB5R3,UBA52,CLIC1,TCEA1,ALDOA,JUND,GUSB,ENO1,RPL35,ANP32B,EIF3E,PSMB6,EIF4G2,FTL,BTG2,COX7C,TXN,ITGB1,EEF1G,COX4I1,CANX,ARF1,PSMC1,TMED10,PSMB4,DUSP1,ACTB,COX6A1,GLUL,UQCRB,PHB2,SET,PSMD7,TXNIP,SLC25A5,DYNLL1,NDUF…
Cortex	24hrs	aMG	2.68383e-32	8.60215	1.34191e-30	Hallmark	HALLMARK_MYC_TARGETS_V1	548	48	ERH,HSP90AB1,HNRNPA2B1,EIF3D,HNRNPA3,EIF4A1,NHP2,SRSF2,SERBP1,C1QBP,PSMD8,EIF3J,H2AFZ,NOP56,SSB,PSMA2,SNRPD1,PSMA7,CCT5,LDHA,NME1,PA2G4,GSPT1,EIF2S2,RSL1D1,NDUFAB1,NOLC1,HNRNPU,RANBP1,GNL3,EIF4G2,CCT3,PCNA,PSMA1,PSMD14,CANX,SNRPD3,EIF2S1,CCT2,CNBP,HSPE1,DDX21,PHB2,EPRS,SET,PSMD7,PSMC4,NAP1L1
Cortex	24hrs	aMG	2.59475e-29	5.8417	8.84552e-26	ChemicalGeneticPerturbations	RHEIN_ALL_GLUCOCORTICOID_THERAPY_DN	548	59	JUN,FOS,SSR1,ACAT1,HSP90AB1,MEF2C,HNRNPA3,HMGN2,HMGN4,DAD1,NHP2,SERBP1,CCT8,TCF12,CALM1,C1QBP,PARK7,TUBB,LDHA,NME1,MIF,EGR1,RSL1D1,ENO1,TALDO1,ANP32B,FLI1,FOSB,LAT2,GIMAP6,RCAN1,CCT3,PCNA,PDIA6,TKT,PSMD14,CANX,ANP32E,SNRPD3,PGD,TPI1,RBM8A,CNBP,TUBA1B,EPRS,TUBA1C,SET,DUSP6,PAK2,DYNLL1,FRMD4B,CCT6A,GAPDH,CACYBP,AKR1A1,PRDX1,CCND3,EID1,NAP1L1
Cortex	24hrs	aMG	8.08648e-26	4.88031	3.76264e-22	GObp	GO_POSTTRANSCRIPTIONAL_REGULATION_OF_GENE_EXPRESSION	548	61	SRRT,EIF3CL,YWHAB,PRKCA,USP16,PSMB1,HNRNPA2B1,EIF3D,EIF4A1,TNF,SERBP1,C1QBP,CALR,PSMD4,PSMD8,EIF3J,PSME1,RGS2,EIF3C,MAPK14,ZFP36,PSME2,PSMA2,BANK1,EIF5B,CPEB1,PSMA7,PPP1CA,PA2G4,UBA52,RBM3,PSMD11,EIF3E,PSMB6,HNRNPU,EIF4G2,BTG2,PSMA1,PSMD14,CDC37,PSMC3,PSMC1,PSMB4,EIF2S1,TNPO1,EIF5A,EIF5AL1,RBM8A,PSMC5,EIF4G1,EPRS,SET,EIF3A,DHX9,PSMD7,PASK,GAPDH,PSMC4,UBC,PSMC2,PSMD2
Cortex	24hrs	aMG	4.90983e-25	2.66865	1.67376e-21	ChemicalGeneticPerturbations	PUJANA_BRCA1_PCC_NETWORK	548	123	HSPA4,LY86,SSR1,SRRT,EEF1A1,RREB1,ERH,YWHAB,MFAP1,ACTR2,HK2,PRKCA,LARP7,HINT1,PSMB1,HNRNPA2B1,HMGN1,FUBP1,EIF3D,HNRNPA3,HNRNPAB,HMGN2,HMGN4,NAP1L4,ADAM10,EIF4A1,ARPC2,TNF,RAC2,NHP2,SRSF2,SERBP1,CCT8,NOP14,CASK,COX7B,MRPL33,C1QBP,CALR,BZW1,SMARCA5,NCL,H2AFZ,NMT1,HDAC1,NOP56,RHOH,SSB,ZNF207,PSME2,PSMA2,H2AFY,TMED5,EIF5B,SNRPD1,CCT5,MED21,LDHA,NME1,PA2G4,MPHOSPH10,MIF,TCEA1,PDAP1,RBM3,GSPT1,EIF2S2,R…
Cortex	24hrs	aMG	5.47075e-25	3.49781	1.86498e-21	ChemicalGeneticPerturbations	GRADE_COLON_CANCER_UP	548	85	CSTB,SSR1,ERH,ACTG1,PDCD5,HNRNPA2B1,HMGN1,EIF3D,ADAM15,EIF4A1,ARPC2,MDH2,CCT8,CASK,CALR,PSMD4,PSMD8,HSD17B12,ARHGDIA,PSME1,NCL,H2AFZ,COX6B1,NOP56,PYCARD,ZNF207,GNB2,BANF1,H2AFY,SSR2,CTSB,OAZ1,PSMA7,CCT5,NDUFV3,TECR,LDHA,NME1,UBA52,CLIC1,MIF,PDAP1,RBM3,FKBP2,ENO1,RPL35,TALDO1,EIF3E,RANBP1,PCNA,COX7C,PSMA1,TXN,EEF1G,HSPA9,TKT,ARPC3,TSPO,SNRPD3,PGD,TPI1,PSMB4,DDX27,ITGA6,CCT2,EIF5A,COX6A1,PDIA4,HSP9…
Cortex	24hrs	aMG	7.50613e-25	5.53056	2.55884e-21	ChemicalGeneticPerturbations	PENG_GLUTAMINE_DEPRIVATION_DN	548	52	SERINC3,HSPA4,SRRT,ERH,HSP90AB1,HNRNPA2B1,HNRNPAB,PFN1,C1QBP,CALR,BZW1,PSMD8,NCL,NMT1,NOP56,CTSC,SSB,ZNF207,TUBB,EIF5B,CCT5,LDHA,NME1,MPHOSPH10,CLIC1,STIP1,GSPT1,ALDOA,FKBP2,ATP1B3,PSMD11,MANF,NOLC1,PSMB6,EIF4G2,HSPA5,PDIA6,DNAJA1,TMED10,EIF2S1,TNPO1,CCT2,EIF5AL1,HSP90B1,HSPE1,EIF4G1,DDX21,DHX9,TXNIP,CCT6A,BOLA2,PRDX1
Cortex	24hrs	aMG	2.7362e-24	5.17509	9.3277e-21	ChemicalGeneticPerturbations	WANG_TUMOR_INVASIVENESS_UP	548	54	HSPA4,CTSZ,ARIH1,ACTG1,YWHAG,HINT1,HNRNPA2B1,UBXN1,HBA1,HNRNPAB,C1QB,DAB2,NHP2,SERBP1,COX7A2,FKBP3,H2AFZ,TUBB,PSMA2,EIF5B,PSMA7,CCT5,NEDD8,CCDC47,SSR3,STIP1,EIF2S2,ENO1,BAG1,RPL35,HNRNPU,EIF4G2,CRELD2,CCT3,PCNA,NUCKS1,HSPA5,TKT,ARPC3,NISCH,NDUFC2,PSMB4,CCT2,GLUL,HSP90B1,HSPE1,EIF4G1,TUBA1B,SLC25A5,CD63,AKR1A1,PSMC2,EID1,NAP1L1
Cortex	24hrs	aMG	5.41073e-24	3.83649	1.84452e-20	ChemicalGeneticPerturbations	KIM_BIPOLAR_DISORDER_OLIGODENDROCYTE_DENSITY_CORR_UP	548	73	CD81,EEF1A1,NDUFC1,ACTG1,PDIA3,HINT1,HMGN1,EIF3D,HNRNPA3,HNRNPAB,PFN1,CFL1,DAD1,ARPC2,CCT8,SSR4,COX7A2,C1QBP,P4HB,PSMD8,PSME1,NCL,COX6B1,H2AFY,OAZ1,NEDD8,MIF,STIP1,ALDOA,ATP6AP1,ELMO1,ENO1,BAG1,RPL35,PSMD11,TALDO1,NDUFAB1,EIF3E,PSMB6,FTL,ERP29,CCT3,COX7C,UQCRQ,TKT,ARPC3,CANX,NISCH,PSMC1,TMED10,TPI1,PSMB4,LPIN2,CCT2,SLC25A4,COX6A1,PSMC5,CNBP,HSP90B1,UQCRB,PHB2,NARS,PSMD7,NDUFB8,AP2S1,AKR1A1,PRDX1,…
Cortex	24hrs	aMG	4.60054e-23	12.2618	3.10076e-20	Reactome	REACTOME_ANTIGEN_PROCESSING_CROSS_PRESENTATION	548	26	FCGR1B,PDIA3,PSMB1,CALR,PSMD4,PSMD8,PSME1,NCF4,PSME2,PSMA2,PSMA7,UBA52,PSMD11,PSMB6,FCGR1A,PSMA1,PSMD14,PSMC3,PSMC1,PSMB4,PSMC5,PSMD7,PSMC4,SEC61G,PSMC2,PSMD2
Cortex	24hrs	aMG	4.60991e-21	6.63082	2.30496e-19	Hallmark	HALLMARK_MTORC1_SIGNALING	548	37	HSPA4,SSR1,ACTR2,HK2,DAPP1,CALR,NMT1,CTSC,LDHA,TCEA1,STIP1,PDAP1,SDF2L1,ALDOA,FKBP2,EIF2S2,ENO1,BTG2,HSPA5,HSPA9,PSMD14,CDKN1A,CANX,TPI1,HSP90B1,HSPE1,LGMN,EPRS,CCT6A,GAPDH,PSMC4,CACYBP,PRDX1,PSMC2,SLA,TXNRD1,M6PR
Cortex	24hrs	aMG	5.89033e-22	15.681	3.97009e-19	Reactome	REACTOME_CROSS_PRESENTATION_OF_SOLUBLE_EXOGENOUS_ANTIGENS_ENDOSOMES	548	21	FCGR1B,PSMB1,PSMD4,PSMD8,PSME1,PSME2,PSMA2,PSMA7,PSMD11,PSMB6,FCGR1A,PSMA1,PSMD14,PSMC3,PSMC1,PSMB4,PSMC5,PSMD7,PSMC4,PSMC2,PSMD2
Cortex	24hrs	aMG	6.90037e-22	13.5143	4.65085e-19	Reactome	REACTOME_ER_PHAGOSOME_PATHWAY	548	23	PDIA3,PSMB1,CALR,PSMD4,PSMD8,PSME1,PSME2,PSMA2,PSMA7,UBA52,PSMD11,PSMB6,PSMA1,PSMD14,PSMC3,PSMC1,PSMB4,PSMC5,PSMD7,PSMC4,SEC61G,PSMC2,PSMD2
Cortex	24hrs	aMG	1.64298e-22	2.74912	5.60093e-19	ChemicalGeneticPerturbations	DIAZ_CHRONIC_MEYLOGENOUS_LEUKEMIA_UP	548	106	SERINC3,SSR1,RREB1,TGM2,ACAT1,HSP90AB1,MFAP1,ACTR2,HK2,PSMB1,CSNK1A1,RBPJ,HNRNPAB,HMGN4,NAP1L4,PFN1,DAD1,RAC2,CSF1,SRSF2,SKP1,MDH2,CCT8,TCF12,GTF2F1,CALM1,NPTN,C1QBP,BSG,FKBP3,INPP4B,CSF2RB,CSDE1,HADHA,PSMD8,HSD17B12,EIF3J,SMARCA5,NMT1,HDAC1,RHOH,NCF4,SSB,ZNF207,GTPBP4,GNB2,PSMA2,LUC7L3,SNRPD1,PSMA7,SDF4,MED21,TMED3,SUPT16H,NME1,MIF,TCEA1,PDAP1,RBM3,GSPT1,CPD,EIF2S2,IL1B,NDUFAB1,NOLC1,RANBP1,GNL3…
Cortex	24hrs	aMG	9.85903e-22	11.094	6.64499e-19	Reactome	REACTOME_REGULATION_OF_MRNA_STABILITY_BY_PROTEINS_THAT_BIND_AU_RICH_ELEMENTS	548	26	YWHAB,PRKCA,PSMB1,PSMD4,PSMD8,PSME1,MAPK14,ZFP36,PSME2,PSMA2,PSMA7,UBA52,PSMD11,PSMB6,PSMA1,PSMD14,PSMC3,PSMC1,PSMB4,TNPO1,PSMC5,EIF4G1,PSMD7,PSMC4,PSMC2,PSMD2
Cortex	24hrs	aMG	1.76802e-22	6.78568	8.22658e-19	GObp	GO_FC_RECEPTOR_SIGNALING_PATHWAY	548	39	JUN,FCGR1B,FOS,ACTG1,HSP90AB1,ACTR2,PSMB1,ARPC2,SKP1,CALM1,PSMD4,PSMD8,PSME1,PSME2,PSMA2,PSMA7,UBA52,ELMO1,PSMD11,PSMB6,LAT2,FCGR1A,PSMA1,ARPC3,PSMD14,PSMC3,ARPC1B,PSMC1,PSMB4,ACTB,FCGR2A,PSMC5,PSMD7,PAK2,FCGR3A,PSMC4,UBC,PSMC2,PSMD2
Cortex	24hrs	aMG	1.52348e-21	14.0809	1.02683e-18	Reactome	REACTOME_SCFSKP2_MEDIATED_DEGRADATION_OF_P27_P21	548	22	PSMB1,SKP1,PSMD4,PSMD8,PSME1,PSME2,PSMA2,PSMA7,UBA52,PSMD11,PSMB6,PSMA1,PSMD14,CDKN1A,PSMC3,PSMC1,PSMB4,PSMC5,PSMD7,PSMC4,PSMC2,PSMD2
Cortex	24hrs	aMG	3.78569e-22	7.09179	1.29054e-18	ChemicalGeneticPerturbations	PENG_LEUCINE_DEPRIVATION_DN	548	37	HSPA4,ERH,HSP90AB1,CALR,NCL,NMT1,NOP56,CTSC,SSB,BST2,PSMA7,CCT5,LDHA,STIP1,GSPT1,ALDOA,FKBP2,PSMD11,MANF,EIF4G2,HSPA5,PDIA6,PSMD14,DNAJA1,EIF2S1,CCT2,PDIA4,HSP90B1,HSPE1,EIF4G1,DDX21,DHX9,DYNLL1,CCT6A,UBC,PSMD2,MLEC
Cortex	24hrs	aMG	3.10518e-21	14.7586	2.09289e-18	Reactome	REACTOME_SCF_BETA_TRCP_MEDIATED_DEGRADATION_OF_EMI1	548	21	PSMB1,SKP1,PSMD4,PSMD8,PSME1,PSME2,PSMA2,PSMA7,UBA52,PSMD11,PSMB6,PSMA1,PSMD14,PSMC3,PSMC1,PSMB4,PSMC5,PSMD7,PSMC4,PSMC2,PSMD2
Cortex	24hrs	aMG	8.73583e-21	14.2017	5.88795e-18	Reactome	REACTOME_DESTABILIZATION_OF_MRNA_BY_AUF1_HNRNP_D0	548	21	PSMB1,PSMD4,PSMD8,PSME1,PSME2,PSMA2,PSMA7,UBA52,PSMD11,PSMB6,PSMA1,PSMD14,PSMC3,PSMC1,PSMB4,PSMC5,EIF4G1,PSMD7,PSMC4,PSMC2,PSMD2
Cortex	24hrs	aMG	1.76313e-21	2.68242	8.20383e-18	GObp	GO_REGULATION_OF_IMMUNE_SYSTEM_PROCESS	548	105	CD81,JUN,FCGR1B,FOS,ACTG1,HSP90AB1,ACTR2,SIRPG,MEF2C,C1QC,PRKCA,PSMB1,CDK6,C1QB,ADAM10,TNFAIP8L2,ARPC2,TNF,RAC2,CSF1,SKP1,C1QA,CALM1,ITGAM,C1QBP,CALR,PSMD4,MERTK,PSMD8,PSME1,CSF3R,SNX6,CCL4,PLCL2,PYCARD,CTLA4,MAPK14,PSME2,PSMA2,BST2,BANK1,CTSB,SNRPD1,CD33,PSMA7,SPPL2A,NME1,UBA52,TNFAIP3,MIF,ICAM1,TMEM176B,ATP6AP1,ELMO1,IRAK2,CD83,IL1B,PSMD11,CCL2,PSMB6,LAT2,FCGR1A,MBD5,PSMA1,ITGB1,TRPM4,ARPC3,PSM…
Cortex	24hrs	aMG	2.70409e-21	2.81059	9.21824e-18	ChemicalGeneticPerturbations	BLALOCK_ALZHEIMERS_DISEASE_DN	548	97	SERINC3,SSR1,DENND4A,ULK2,PDCD5,ACAT1,HSP90AB1,YWHAB,ACTR2,MEF2C,HINT1,EIF3D,HMGN4,ARPC2,SRSF2,SERBP1,MDH2,COX7A2,CALM1,UQCR10,COX7B,NPTN,USP6,CALR,BSG,FKBP3,HSD17B12,PLCL2,RGS2,COX6B1,SSB,ZNF207,MAPK14,H2AFY,PSMA7,CCT5,NEDD8,LDHA,NME1,COX5B,DYNLRB1,ATP6AP1,ELMO1,CNTNAP2,PSMD11,NDUFAB1,NOLC1,PSMB6,ASAH1,UBL5,FHIT,MEF2A,CCT3,PCNA,SLC1A1,COX7C,PSMA1,RALB,UQCRQ,TXN,HSPA5,PDIA6,HSPA9,ARPC3,PSMD14,PDE…
Cortex	24hrs	aMG	1.74023e-20	14.9343	1.17291e-17	Reactome	REACTOME_CDK_MEDIATED_PHOSPHORYLATION_AND_REMOVAL_OF_CDC6	548	20	PSMB1,PSMD4,PSMD8,PSME1,PSME2,PSMA2,PSMA7,UBA52,PSMD11,PSMB6,PSMA1,PSMD14,PSMC3,PSMC1,PSMB4,PSMC5,PSMD7,PSMC4,PSMC2,PSMD2
Cortex	24hrs	aMG	2.96728e-20	14.6295	1.99995e-17	Reactome	REACTOME_REGULATION_OF_ORNITHINE_DECARBOXYLASE_ODC	548	20	PSMB1,PSMD4,PSMD8,PSME1,PSME2,PSMA2,OAZ1,PSMA7,PSMD11,PSMB6,PSMA1,PSMD14,PSMC3,PSMC1,PSMB4,PSMC5,PSMD7,PSMC4,PSMC2,PSMD2
Cortex	24hrs	aMG	1.11348e-20	3.41355	3.79585e-17	ChemicalGeneticPerturbations	KIM_ALL_DISORDERS_OLIGODENDROCYTE_NUMBER_CORR_UP	548	72	CD81,CSTB,CTSA,NDUFC1,ACTG1,HINT1,HMGN1,EIF3D,PFN1,CFL1,DAD1,ARPC2,TBC1D9,CCT8,SSR4,COX7A2,C1QBP,HADHA,PSMD8,NCL,SNX6,COX6B1,H2AFY,OAZ1,PPP1CA,TECR,NEDD8,COX5B,MIF,STIP1,COPE,ALDOA,ATP6AP1,ELMO1,DOCK4,ENO1,BAG1,RPL35,TALDO1,NDUFAB1,ANP32B,PSMB6,EIF4G2,IPCEF1,FTL,ERP29,CCT3,COX7C,UQCRQ,TKT,COX4I1,CANX,PSMC1,TPI1,PSMB4,CCT2,SLC25A4,COX6A1,PSMC5,UQCRB,LGMN,CLASP2,NARS,PSMD7,NDUFB8,GAPDH,AP2S1,AKR1A1…
Cortex	24hrs	aMG	5.93957e-20	13.2051	4.00327e-17	Reactome	REACTOME_P53_DEPENDENT_G1_DNA_DAMAGE_RESPONSE	548	21	PSMB1,PSMD4,PSMD8,PSME1,PSME2,PSMA2,PSMA7,UBA52,PSMD11,PSMB6,PSMA1,PSMD14,CDKN1A,PSMC3,PSMC1,PSMB4,PSMC5,PSMD7,PSMC4,PSMC2,PSMD2
Cortex	24hrs	aMG	8.62638e-21	3.22457	4.01386e-17	GObp	GO_POSITIVE_REGULATION_OF_IMMUNE_SYSTEM_PROCESS	548	78	CD81,JUN,FOS,ACTG1,HSP90AB1,ACTR2,SIRPG,MEF2C,C1QC,PRKCA,PSMB1,C1QB,ADAM10,ARPC2,TNF,RAC2,CSF1,SKP1,C1QA,ITGAM,C1QBP,CALR,PSMD4,PSMD8,PSME1,SNX6,CCL4,PYCARD,CTLA4,MAPK14,PSME2,PSMA2,CTSB,PSMA7,UBA52,TNFAIP3,MIF,ICAM1,ATP6AP1,ELMO1,IRAK2,CD83,IL1B,PSMD11,CCL2,PSMB6,LAT2,FCGR1A,PSMA1,ARPC3,PSMD14,PDE4D,CDKN1A,PSMC3,ARPC1B,PSMC1,PSMB4,GAS6,ACTB,INPP5D,FCGR2A,PSMC5,HSP90B1,HCLS1,CD14,CMTM3,LGMN,CCL8,…
Cortex	24hrs	aMG	1.0042e-20	4.44881	4.67253e-17	GObp	GO_ACTIVATION_OF_IMMUNE_RESPONSE	548	53	ACTG1,HSP90AB1,ACTR2,MEF2C,C1QC,PSMB1,C1QB,ARPC2,SKP1,C1QA,ITGAM,C1QBP,PSMD4,PSMD8,PSME1,PYCARD,CTLA4,PSME2,PSMA2,CTSB,PSMA7,UBA52,TNFAIP3,ELMO1,IRAK2,PSMD11,PSMB6,LAT2,FCGR1A,PSMA1,ARPC3,PSMD14,PDE4D,PSMC3,ARPC1B,PSMC1,PSMB4,ACTB,INPP5D,FCGR2A,PSMC5,HSP90B1,CD14,LGMN,PSMD7,PAK2,BIRC3,FCGR3A,C5AR1,PSMC4,UBC,PSMC2,PSMD2
Cortex	24hrs	aMG	8.25676e-20	14.0558	5.56506e-17	Reactome	REACTOME_P53_INDEPENDENT_G1_S_DNA_DAMAGE_CHECKPOINT	548	20	PSMB1,PSMD4,PSMD8,PSME1,PSME2,PSMA2,PSMA7,UBA52,PSMD11,PSMB6,PSMA1,PSMD14,PSMC3,PSMC1,PSMB4,PSMC5,PSMD7,PSMC4,PSMC2,PSMD2
Cortex	24hrs	aMG	8.25676e-20	14.0558	5.56506e-17	Reactome	REACTOME_AUTODEGRADATION_OF_THE_E3_UBIQUITIN_LIGASE_COP1	548	20	PSMB1,PSMD4,PSMD8,PSME1,PSME2,PSMA2,PSMA7,UBA52,PSMD11,PSMB6,PSMA1,PSMD14,PSMC3,PSMC1,PSMB4,PSMC5,PSMD7,PSMC4,PSMC2,PSMD2
Cortex	24hrs	aMG	8.64329e-20	12.1312	5.82558e-17	Reactome	REACTOME_SIGNALING_BY_WNT	548	22	PSMB1,CSNK1A1,SKP1,PSMD4,PSMD8,PSME1,PSME2,PSMA2,PSMA7,UBA52,PSMD11,PSMB6,PSMA1,PSMD14,PSMC3,PSMC1,PSMB4,PSMC5,PSMD7,PSMC4,PSMC2,PSMD2
Cortex	24hrs	aMG	8.64329e-20	12.1312	5.82558e-17	Reactome	REACTOME_CYCLIN_E_ASSOCIATED_EVENTS_DURING_G1_S_TRANSITION_	548	22	PSMB1,SKP1,PSMD4,PSMD8,PSME1,PSME2,PSMA2,PSMA7,UBA52,PSMD11,PSMB6,PSMA1,PSMD14,CDKN1A,PSMC3,PSMC1,PSMB4,PSMC5,PSMD7,PSMC4,PSMC2,PSMD2
Cortex	24hrs	aMG	9.32376e-20	12.9774	6.28422e-17	Reactome	REACTOME_REGULATION_OF_APOPTOSIS	548	21	PSMB1,PSMD4,PSMD8,PSME1,PSME2,PSMA2,PSMA7,UBA52,PSMD11,PSMB6,PSMA1,PSMD14,PSMC3,PSMC1,PSMB4,PSMC5,PSMD7,PAK2,PSMC4,PSMC2,PSMD2
Cortex	24hrs	aMG	1.40218e-20	7.99361	6.52434e-17	GObp	GO_REGULATION_OF_RNA_STABILITY	548	31	YWHAB,PRKCA,PSMB1,SERBP1,PSMD4,PSMD8,PSME1,MAPK14,ZFP36,PSME2,PSMA2,PSMA7,UBA52,PSMD11,PSMB6,HNRNPU,PSMA1,PSMD14,PSMC3,PSMC1,PSMB4,TNPO1,PSMC5,EIF4G1,SET,DHX9,PSMD7,PSMC4,UBC,PSMC2,PSMD2
Cortex	24hrs	aMG	2.14469e-20	2.89208	7.31124e-17	ChemicalGeneticPerturbations	DANG_BOUND_BY_MYC	548	89	HSPA4,CSTB,ACTG1,MFAP1,HINT1,JUNB,PSMB1,HNRNPA2B1,CDK6,UBXN1,HBA2,HBA1,HMGN2,PFN1,MT2A,EIF4A1,TNF,RAC2,SRSF2,CCT8,TCF12,UQCR10,CALR,BZW1,BSG,CSF2RB,CSDE1,PSMD8,NCL,H2AFZ,RGS2,EIF3C,PYCARD,CTSC,SSB,H2AFY,ARSB,OAZ1,CCT5,LDHA,SUPT16H,NME1,PA2G4,UBA52,RBM3,ICAM1,SDF2L1,FCHSD2,FKBP2,ENO1,MANF,SMAD7,CNDP2,ASAH1,GNL3,NR6A1,PCNA,MAP3K5,COX7C,PSMA1,TXN,ITGB1,HSPA9,PSMD14,PTPN1,ARF1,SNRPD3,RHEB,TMED10,ITGA…
Cortex	24hrs	aMG	1.80093e-20	3.21662	8.37973e-17	GObp	GO_REGULATION_OF_IMMUNE_RESPONSE	548	77	CD81,JUN,FCGR1B,FOS,ACTG1,HSP90AB1,ACTR2,MEF2C,C1QC,PSMB1,C1QB,ARPC2,TNF,RAC2,SKP1,C1QA,CALM1,ITGAM,C1QBP,PSMD4,PSMD8,PSME1,SNX6,PLCL2,PYCARD,CTLA4,PSME2,PSMA2,BST2,CTSB,CD33,PSMA7,SPPL2A,UBA52,TNFAIP3,MIF,ICAM1,ELMO1,IRAK2,IL1B,PSMD11,PSMB6,LAT2,FCGR1A,PSMA1,ITGB1,TRPM4,ARPC3,PSMD14,PDE4D,PTPN1,CDC37,PSMC3,ARPC1B,PSMC1,PSMB4,ACTB,INPP5D,FCGR2A,FCGR2B,PSMC5,HSP90B1,CD14,CMTM3,PHB2,LGMN,IL4R,PSMD7…
Cortex	24hrs	aMG	4.72462e-19	14.1876	8.78779e-17	Kegg	KEGG_PROTEASOME	548	19	PSMB1,PSMD4,PSMD8,PSME1,PSME2,PSMA2,PSMA7,PSMD11,PSMB6,PSMA1,PSMD14,PSMC3,PSMC1,PSMB4,PSMC5,PSMD7,PSMC4,PSMC2,PSMD2
Cortex	24hrs	aMG	1.34948e-19	13.7855	9.0955e-17	Reactome	REACTOME_VIF_MEDIATED_DEGRADATION_OF_APOBEC3G	548	20	PSMB1,PSMD4,PSMD8,PSME1,PSME2,PSMA2,PSMA7,UBA52,PSMD11,PSMB6,PSMA1,PSMD14,PSMC3,PSMC1,PSMB4,PSMC5,PSMD7,PSMC4,PSMC2,PSMD2
Cortex	24hrs	aMG	3.35348e-19	7.87444	2.26024e-16	Reactome	REACTOME_HOST_INTERACTIONS_OF_HIV_FACTORS	548	29	PSMB1,SKP1,PSMD4,PSMD8,PSME1,PSME2,BANF1,PSMA2,PSMA7,UBA52,ELMO1,PSMD11,PSMB6,RANBP1,PSMA1,PSMD14,ARF1,PSMC3,PSMC1,PSMB4,SLC25A4,PSMC5,PSMD7,PAK2,SLC25A5,PSMC4,AP2S1,PSMC2,PSMD2
Cortex	24hrs	aMG	8.53174e-19	12.8008	5.75039e-16	Reactome	REACTOME_CDT1_ASSOCIATION_WITH_THE_CDC6_ORC_ORIGIN_COMPLEX	548	20	PSMB1,PSMD4,PSMD8,PSME1,PSME2,PSMA2,PSMA7,UBA52,PSMD11,PSMB6,PSMA1,PSMD14,PSMC3,PSMC1,PSMB4,PSMC5,PSMD7,PSMC4,PSMC2,PSMD2
Cortex	24hrs	aMG	1.2926e-19	11.9474	6.01445e-16	GObp	GO_ANTIGEN_PROCESSING_AND_PRESENTATION_OF_EXOGENOUS_PEPTIDE_ANTIGEN_VIA_MHC_CLASS_I	548	22	FCGR1B,PSMB1,PSMD4,PSMD8,PSME1,NCF4,PSME2,PSMA2,PSMA7,PSMD11,PSMB6,FCGR1A,PSMA1,PSMD14,PSMC3,PSMC1,PSMB4,PSMC5,PSMD7,PSMC4,PSMC2,PSMD2
Cortex	24hrs	aMG	1.37983e-19	2.27627	6.42034e-16	GObp	GO_IMMUNE_SYSTEM_PROCESS	548	126	JUN,SERINC3,FCGR1B,LY86,ACTG1,PDIA3,HSP90AB1,ACTR2,SIRPB1,SIRPG,SIRPA,MEF2C,C1QC,JUNB,PSMB1,RBPJ,CDK6,C1QB,ADAM15,ADAM10,MT2A,TNFAIP8L2,ARPC2,TNF,CSF1,SKP1,C1QA,TCF12,ITGAM,DOCK8,C1QBP,CALR,PSMD4,BSG,MERTK,PSMD8,PSME1,CSF3R,DYNLL2,CCL4,CCL4L2,PLCL2,PYCARD,RHOH,CTLA4,NCF4,CTSC,MAPK14,TUBB,PSME2,PSMA2,BST2,BANK1,CTSB,DNASE2,PSMA7,UBA52,TNFAIP3,MIF,EGR1,ICAM1,ELMO1,IRAK2,PTPRO,TGFBR1,ATP1B3,CD83,IL1…
Cortex	24hrs	aMG	1.62623e-19	9.84678	7.56683e-16	GObp	GO_ANTIGEN_PROCESSING_AND_PRESENTATION_OF_PEPTIDE_ANTIGEN_VIA_MHC_CLASS_I	548	25	FCGR1B,PDIA3,PSMB1,CALR,PSMD4,PSMD8,PSME1,NCF4,PSME2,PSMA2,PSMA7,PSMD11,PSMB6,FCGR1A,PSMA1,PSMD14,CANX,PSMC3,PSMC1,PSMB4,PSMC5,PSMD7,PSMC4,PSMC2,PSMD2
Cortex	24hrs	aMG	1.14014e-18	11.7608	7.68457e-16	Reactome	REACTOME_ACTIVATION_OF_NF_KAPPAB_IN_B_CELLS	548	21	PSMB1,SKP1,PSMD4,PSMD8,PSME1,PSME2,PSMA2,PSMA7,UBA52,PSMD11,PSMB6,PSMA1,PSMD14,PSMC3,PSMC1,PSMB4,PSMC5,PSMD7,PSMC4,PSMC2,PSMD2
Cortex	24hrs	aMG	4.27355e-19	4.88254	1.98848e-15	GObp	GO_IMMUNE_RESPONSE_REGULATING_CELL_SURFACE_RECEPTOR_SIGNALING_PATHWAY	548	44	JUN,FCGR1B,FOS,ACTG1,HSP90AB1,ACTR2,MEF2C,PSMB1,ARPC2,SKP1,CALM1,PSMD4,PSMD8,PSME1,CTLA4,PSME2,PSMA2,PSMA7,UBA52,ELMO1,PSMD11,PSMB6,LAT2,FCGR1A,PSMA1,ARPC3,PSMD14,PDE4D,PSMC3,ARPC1B,PSMC1,PSMB4,ACTB,INPP5D,FCGR2A,PSMC5,PSMD7,PAK2,FCGR3A,C5AR1,PSMC4,UBC,PSMC2,PSMD2
Cortex	24hrs	aMG	3.56034e-18	11.2342	2.39967e-15	Reactome	REACTOME_ORC1_REMOVAL_FROM_CHROMATIN	548	21	PSMB1,PSMD4,PSMD8,PSME1,PSME2,PSMA2,PSMA7,UBA52,PSMD11,PSMB6,PSMA1,PSMD14,CDKN1A,PSMC3,PSMC1,PSMB4,PSMC5,PSMD7,PSMC4,PSMC2,PSMD2
Cortex	24hrs	aMG	2.45425e-18	11.4044	1.14196e-14	GObp	GO_REGULATION_OF_CELLULAR_AMINO_ACID_METABOLIC_PROCESS	548	21	PSMB1,PARK7,PSMD4,PSMD8,PSME1,PSME2,PSMA2,OAZ1,PSMA7,PSMD11,PSMB6,PSMA1,PSMD14,PSMC3,PSMC1,PSMB4,PSMC5,PSMD7,PSMC4,PSMC2,PSMD2
Cortex	24hrs	aMG	3.79084e-18	3.17473	1.2923e-14	ChemicalGeneticPerturbations	PUJANA_CHEK2_PCC_NETWORK	548	69	HSPA4,ERH,YWHAB,MFAP1,HK2,LARP7,HNRNPA2B1,HMGN1,FUBP1,HNRNPA3,HNRNPAB,HMGN2,HMGN4,NAP1L4,NHP2,SRSF2,SERBP1,CCT8,NOP14,COX7B,C1QBP,BZW1,SMARCA5,NCL,H2AFZ,NMT1,HDAC1,NOP56,RHOH,SSB,PSME2,PSMA2,EIF5B,CCT5,MED21,LDHA,NME1,PA2G4,MPHOSPH10,MIF,TCEA1,GSPT1,EIF2S2,NOLC1,RANBP1,CCT3,PCNA,PSMA1,HSPA9,SART3,ANP32E,SNRPD3,PSMB4,EIF2S1,BTF3,CCT2,EIF5AL1,CNBP,HSPE1,DDX21,TUBA1B,SET,DHX9,SLC25A5,BOLA2,SEC61G,PR…
Cortex	24hrs	aMG	3.00431e-18	9.9322	1.39791e-14	GObp	GO_NIK_NF_KAPPAB_SIGNALING	548	23	PSMB1,SKP1,PSMD4,PSMD8,PSME1,PSME2,PSMA2,PSMA7,UBA52,PSMD11,PSMB6,PSMA1,PSMD14,PSMC3,PSMC1,PSMB4,PSMC5,PSMD7,BIRC3,PSMC4,UBC,PSMC2,PSMD2
Cortex	24hrs	aMG	2.11544e-17	11.2007	1.42581e-14	Reactome	REACTOME_AUTODEGRADATION_OF_CDH1_BY_CDH1_APC_C	548	20	PSMB1,PSMD4,PSMD8,PSME1,PSME2,PSMA2,PSMA7,UBA52,PSMD11,PSMB6,PSMA1,PSMD14,PSMC3,PSMC1,PSMB4,PSMC5,PSMD7,PSMC4,PSMC2,PSMD2
Cortex	24hrs	aMG	3.04493e-17	11.0284	2.05229e-14	Reactome	REACTOME_ASSEMBLY_OF_THE_PRE_REPLICATIVE_COMPLEX	548	20	PSMB1,PSMD4,PSMD8,PSME1,PSME2,PSMA2,PSMA7,UBA52,PSMD11,PSMB6,PSMA1,PSMD14,PSMC3,PSMC1,PSMB4,PSMC5,PSMD7,PSMC4,PSMC2,PSMD2
Cortex	24hrs	aMG	3.17596e-17	2.88121	2.1406e-14	Reactome	REACTOME_IMMUNE_SYSTEM	548	75	CD81,JUN,FCGR1B,LY86,CTSA,FOS,ARIH1,PDIA3,HSP90AB1,YWHAB,MEF2C,C1QC,PSMB1,C1QB,MT2A,EIF4A1,SKP1,C1QA,CALM1,CALR,PSMD4,CSF2RB,PSMD8,PSME1,DYNLL2,PYCARD,CTLA4,NCF4,CTSC,MAPK14,PSME2,PSMA2,CTSB,PSMA7,UBA52,TNFAIP3,EGR1,ICAM1,IRAK2,IL1B,PSMD11,PSMB6,FCGR1A,EIF4G2,MEF2A,PSMA1,TXN,ITGB1,HSPA5,PSMD14,CDKN1A,CANX,PTPN1,ARF1,PSMC3,PSMC1,PSMB4,FCGR2B,PSMC5,HSP90B1,EIF4G1,CD14,LGMN,DUSP6,PSMD7,TXNIP,PAK2,BI…
Cortex	24hrs	aMG	7.14838e-18	3.62879	3.32614e-14	GObp	GO_POSITIVE_REGULATION_OF_IMMUNE_RESPONSE	548	57	ACTG1,HSP90AB1,ACTR2,MEF2C,C1QC,PSMB1,C1QB,ARPC2,TNF,SKP1,C1QA,ITGAM,C1QBP,PSMD4,PSMD8,PSME1,PYCARD,CTLA4,PSME2,PSMA2,CTSB,PSMA7,UBA52,TNFAIP3,MIF,ELMO1,IRAK2,IL1B,PSMD11,PSMB6,LAT2,FCGR1A,PSMA1,ARPC3,PSMD14,PDE4D,PSMC3,ARPC1B,PSMC1,PSMB4,ACTB,INPP5D,FCGR2A,PSMC5,HSP90B1,CD14,LGMN,IL4R,PSMD7,PAK2,BIRC3,FCGR3A,C5AR1,PSMC4,UBC,PSMC2,PSMD2
Cortex	24hrs	aMG	6.29663e-17	5.71399	4.24393e-14	Reactome	REACTOME_HIV_INFECTION	548	33	PSMB1,SKP1,GTF2F1,PSMD4,PSMD8,PSME1,NMT1,PSME2,BANF1,PSMA2,PSMA7,SUPT16H,UBA52,TCEA1,ELMO1,PSMD11,PSMB6,RANBP1,PSMA1,PSMD14,ARF1,PSMC3,PSMC1,PSMB4,SLC25A4,PSMC5,PSMD7,PAK2,SLC25A5,PSMC4,AP2S1,PSMC2,PSMD2
Cortex	24hrs	aMG	1.60327e-17	7.22003	7.46001e-14	GObp	GO_NEGATIVE_REGULATION_OF_PROTEIN_MODIFICATION_BY_SMALL_PROTEIN_CONJUGATION_OR_REMOVAL	548	28	PSMB1,UBXN1,PARK7,PSMD4,PSMD8,PSME1,PSME2,GTPBP4,PSMA2,PSMA7,UBA52,TNFAIP3,PSMD11,SMAD7,PSMB6,PSMA1,PSMD14,DNAJA1,TSPO,PSMC3,PSMC1,PSMB4,PSMC5,PSMD7,PSMC4,UBC,PSMC2,PSMD2
Cortex	24hrs	aMG	3.53765e-17	2.18107	1.20598e-13	ChemicalGeneticPerturbations	PILON_KLF1_TARGETS_DN	548	120	HSPA4,LY86,CTSZ,SSR1,RREB1,TMX4,ACAT1,YWHAB,MFAP1,ACTR2,MEF2C,LMAN2,TMX3,HMGN1,RBPJ,CDK6,HNRNPA3,HNRNPAB,ADAM10,FAM133B,SKP1,SERBP1,CCT8,CALM1,ROMO1,NOP10,ITGAM,NOP14,DOCK8,DAPP1,FKBP3,CSF2RB,CD52,CSF3R,SNX6,PLCL2,RGS2,HDAC1,LUC7L,EIF3C,NOP56,PYCARD,CTSC,MYO7A,MAPK14,ARL15,H2AFY,ARSB,CD33,SDF4,MED21,SPPL2A,NME1,DOCK11,SSR3,DOCK10,FCHSD2,TMEM167A,ELMO1,GUSB,TGFBR1,ATP1B3,NOLC1,FLI1,HNRNPU,MORF4L1,…
Cortex	24hrs	aMG	3.90845e-17	3.65186	1.33239e-13	ChemicalGeneticPerturbations	ENK_UV_RESPONSE_KERATINOCYTE_UP	548	54	JUN,FOS,SSR1,TGM2,HSP90AB1,JUNB,UBXN1,PFN1,CFL1,SPINT1,EIF4A1,SKP1,SSR4,BSG,P4HB,PSMD8,ARHGDIA,PSME1,SDC4,COX6B1,ZFP36,GNB2,BANF1,OAZ1,FAM50A,PPP1CA,TECR,NEDD8,TMED3,COX5B,TNFAIP3,MIF,COPE,ALDOA,FKBP2,JUND,ENO1,RPL35,IL1B,TALDO1,SMAD7,ATF3,SELPLG,CDKN1A,DNAJA1,CDC37,PSMB4,DUSP1,BTF3,COX6A1,PHB2,LGMN,AP2S1,TXNRD1
Cortex	24hrs	aMG	5.80092e-17	3.67436	1.97753e-13	ChemicalGeneticPerturbations	STARK_PREFRONTAL_CORTEX_22Q11_DELETION_DN	548	53	PDCD5,MDH2,SSR4,COX7A2,ROMO1,NOP10,UQCR10,C1QBP,MED28,FKBP3,H2AFZ,PSMA2,CCT5,PPP1CA,NDUFB10,NME1,COX5B,DYNLRB1,STIP1,ALDOA,ATP6AP1,FKBP2,ELMO1,NDUFAB1,CNDP2,PSMB6,RANBP1,MORF4L1,EIF4G2,CCT3,COX7C,TXN,PSMD14,KRTCAP2,PSMC3,PSMC1,RHEB,TPI1,PSMB4,EIF2S1,UQCR11,EVI2A,CCT2,NARS,SLC25A5,MRPS28,DENR,PSMC4,CACYBP,AKR1A1,PRDX1,TPD52,NDUFA2
Cortex	24hrs	aMG	3.23012e-16	9.95619	2.1771e-13	Reactome	REACTOME_APC_C_CDH1_MEDIATED_DEGRADATION_OF_CDC20_AND_OTHER_APC_C_CDH1_TARGETED_PROTEINS_IN_LATE_MITOSIS_EARLY_G1	548	20	PSMB1,PSMD4,PSMD8,PSME1,PSME2,PSMA2,PSMA7,UBA52,PSMD11,PSMB6,PSMA1,PSMD14,PSMC3,PSMC1,PSMB4,PSMC5,PSMD7,PSMC4,PSMC2,PSMD2
Cortex	24hrs	aMG	5.04603e-17	4.97083	2.34792e-13	GObp	GO_REGULATION_OF_CELLULAR_PROTEIN_CATABOLIC_PROCESS	548	38	CD81,ARIH1,HSP90AB1,PSMB1,CSNK1A1,UBXN1,DAB2,SKP1,PARK7,PSMD4,PSMD8,PSME1,CTSC,ZNF207,PSME2,PSMA2,PSMA7,UBA52,TNFAIP3,GBA,PSMD11,SMAD7,PSMB6,FHIT,PSMA1,PSMD14,RNF19B,PSMC3,PSMC1,PSMB4,DUSP1,PSMC5,PSMD7,PSMC4,GPX1,UBC,PSMC2,PSMD2
Cortex	24hrs	aMG	5.7399e-17	5.38404	2.67077e-13	GObp	GO_RESPONSE_TO_TUMOR_NECROSIS_FACTOR	548	35	PSMB1,ADAM10,TNF,PSMD4,PSMD8,PSME1,CCL4,CCL4L2,PYCARD,PSME2,PSMA2,PID1,PSMA7,UBA52,ICAM1,GBA,PSMD11,CCL2,PSMB6,PSMA1,PSMD14,PSMC3,PSMC1,KLF2,PSMB4,CXCL16,PSMC5,CD14,CCL8,PSMD7,BIRC3,PSMC4,UBC,PSMC2,PSMD2
Cortex	24hrs	aMG	7.83619e-17	9.27683	2.67136e-13	ChemicalGeneticPerturbations	GALINDO_IMMUNE_RESPONSE_TO_ENTEROTOXIN	548	22	RREB1,ACTG1,JUNB,MT2A,TNF,RAC2,CSF2RB,CCL4,RHOB,TNFAIP3,ICAM1,CD83,IL1B,DUSP1,CD14,VMP1,SLFN12,SLFN12L,TXNIP,GAPDH,BCL2A1,UBC
Cortex	24hrs	aMG	4.41831e-16	9.81981	2.97794e-13	Reactome	REACTOME_APC_C_CDC20_MEDIATED_DEGRADATION_OF_MITOTIC_PROTEINS	548	20	PSMB1,PSMD4,PSMD8,PSME1,PSME2,PSMA2,PSMA7,UBA52,PSMD11,PSMB6,PSMA1,PSMD14,PSMC3,PSMC1,PSMB4,PSMC5,PSMD7,PSMC4,PSMC2,PSMD2
Cortex	24hrs	aMG	5.30421e-16	8.57098	3.57504e-13	Reactome	REACTOME_SYNTHESIS_OF_DNA	548	22	PSMB1,PSMD4,PSMD8,PSME1,PSME2,PSMA2,PSMA7,UBA52,PSMD11,PSMB6,PCNA,PSMA1,PSMD14,CDKN1A,PSMC3,PSMC1,PSMB4,PSMC5,PSMD7,PSMC4,PSMC2,PSMD2
Cortex	24hrs	aMG	1.17116e-16	3.17144	3.9925e-13	ChemicalGeneticPerturbations	SCHLOSSER_SERUM_RESPONSE_DN	548	63	SERINC3,HSPA4,TGM2,ARIH1,ERH,ACTR2,SIRPA,LARP7,HNRNPA2B1,HMGN1,HNRNPA3,HMGN4,ADAM10,SKP1,SERBP1,TCF12,COX7A2,CALM1,COX7B,MRPL33,NPTN,BZW1,SMARCA5,H2AFZ,NMT1,PLCL2,ZNF207,PSME2,TMED5,TCEA1,MYL12A,ELMO1,EIF2S2,MEF2A,MAP3K5,PSMA1,SRGAP2,HSPA5,CANX,ANP32E,PGD,EVI2A,COPB1,FCGR2A,GLUL,TRA2A,UQCRB,CLASP2,SET,DHX9,PSMD7,PAK2,SLC25A5,GOLGA4,CACYBP,SEC61G,PRDX1,HEXB,UBC,TPD52,NDUFA2,EID1,NAP1L1
Cortex	24hrs	aMG	1.0297e-16	9.77517	4.79118e-13	GObp	GO_ANAPHASE_PROMOTING_COMPLEX_DEPENDENT_CATABOLIC_PROCESS	548	21	PSMB1,PSMD4,PSMD8,PSME1,PSME2,PSMA2,PSMA7,UBA52,PSMD11,PSMB6,PSMA1,PSMD14,PSMC3,PSMC1,PSMB4,PSMC5,PSMD7,PSMC4,UBC,PSMC2,PSMD2
Cortex	24hrs	aMG	1.63988e-16	3.43693	5.59034e-13	ChemicalGeneticPerturbations	SPIELMAN_LYMPHOBLAST_EUROPEAN_VS_ASIAN_DN	548	56	JUN,HSP90AB1,MFAP1,ACTR2,MEF2C,USP16,PSMB1,CSNK1A1,RBPJ,HMGN4,RAC2,MDH2,NPTN,CSDE1,HADHA,HSD17B12,SNX6,RHOH,ZNF207,GTPBP4,PSMA2,SSR2,RHOB,MED21,TMED3,RBM3,GATM,PTPRO,EIF2S2,BAG1,PSMD11,NDUFAB1,NOLC1,ASAH1,KLF6,LCP1,BTG2,SLC1A1,PSMA1,RERE,RALB,SART3,DNAJA1,PTPN1,PDE3B,TMED10,EIF2S1,EVI2A,CCT2,DDX21,LGMN,SLC25A5,CD63,GOLGA4,TXNRD1,M6PR
Cortex	24hrs	aMG	9.59365e-16	6.80219	6.46612e-13	Reactome	REACTOME_MITOTIC_G1_G1_S_PHASES	548	26	PSMB1,CDK6,SKP1,PSMD4,PSMD8,PSME1,HDAC1,PSME2,PSMA2,PSMA7,UBA52,PSMD11,PSMB6,PCNA,PSMA1,PSMD14,CDKN1A,PSMC3,PSMC1,PSMB4,PSMC5,PSMD7,PSMC4,PSMC2,CCND3,PSMD2
Cortex	24hrs	aMG	1.0393e-15	8.85515	7.00489e-13	Reactome	REACTOME_REGULATION_OF_MITOTIC_CELL_CYCLE	548	21	PSMB1,SKP1,PSMD4,PSMD8,PSME1,PSME2,PSMA2,PSMA7,UBA52,PSMD11,PSMB6,PSMA1,PSMD14,PSMC3,PSMC1,PSMB4,PSMC5,PSMD7,PSMC4,PSMC2,PSMD2
Cortex	24hrs	aMG	2.34343e-16	6.07497	1.0904e-12	GObp	GO_ANTIGEN_PROCESSING_AND_PRESENTATION_OF_PEPTIDE_ANTIGEN	548	30	FCGR1B,PDIA3,PSMB1,CALR,PSMD4,PSMD8,PSME1,DYNLL2,NCF4,PSME2,PSMA2,PSMA7,PSMD11,PSMB6,FCGR1A,PSMA1,PSMD14,CANX,ARF1,PSMC3,PSMC1,PSMB4,PSMC5,LGMN,PSMD7,DYNLL1,PSMC4,AP2S1,PSMC2,PSMD2
Cortex	24hrs	aMG	3.39245e-16	9.29245	1.15649e-12	ChemicalGeneticPerturbations	MUNSHI_MULTIPLE_MYELOMA_UP	548	21	JUN,FOS,EEF1A1,PSMB1,DAD1,CSF1,SSR4,CALR,PSME2,PSMA2,FKBP2,JUND,EIF4G2,HSPA5,CANX,UQCR11,HSP90B1,HCLS1,GAPDH,CD63,UBC
Cortex	24hrs	aMG	1.86338e-15	8.12918	1.25592e-12	Reactome	REACTOME_DOWNSTREAM_SIGNALING_EVENTS_OF_B_CELL_RECEPTOR_BCR	548	22	PSMB1,SKP1,PSMD4,PSMD8,PSME1,PSME2,PSMA2,PSMA7,UBA52,PSMD11,PSMB6,PSMA1,PSMD14,CDKN1A,PSMC3,PSMC1,PSMB4,PSMC5,PSMD7,PSMC4,PSMC2,PSMD2
Cortex	24hrs	aMG	2.7596e-16	6.81508	1.28404e-12	GObp	GO_FC_EPSILON_RECEPTOR_SIGNALING_PATHWAY	548	27	JUN,FOS,PSMB1,SKP1,CALM1,PSMD4,PSMD8,PSME1,PSME2,PSMA2,PSMA7,UBA52,PSMD11,PSMB6,LAT2,PSMA1,PSMD14,PSMC3,PSMC1,PSMB4,PSMC5,PSMD7,PAK2,PSMC4,UBC,PSMC2,PSMD2
Cortex	24hrs	aMG	3.8627e-16	5.23021	1.31679e-12	ChemicalGeneticPerturbations	OSWALD_HEMATOPOIETIC_STEM_CELL_IN_COLLAGEN_GEL_UP	548	34	JUN,FOS,H3F3B,HK2,JUNB,DAB2,TNF,TBC1D5,CALR,CCL4,RGS2,SSB,ZFP36,LUC7L3,TNFAIP3,EGR1,ICAM1,CD83,IL1B,PSMD11,FOSB,CCL2,KLF6,BTG2,ATF3,CDKN1A,KLF2,DUSP1,EIF5A,CD14,BIRC3,BCL2A1,IER5,GALNT2
Cortex	24hrs	aMG	2.90786e-16	5.62232	1.35303e-12	GObp	GO_ACTIVATION_OF_INNATE_IMMUNE_RESPONSE	548	32	PSMB1,SKP1,ITGAM,PSMD4,PSMD8,PSME1,PYCARD,PSME2,PSMA2,CTSB,PSMA7,UBA52,TNFAIP3,IRAK2,PSMD11,PSMB6,PSMA1,PSMD14,PSMC3,PSMC1,PSMB4,PSMC5,HSP90B1,CD14,LGMN,PSMD7,PAK2,BIRC3,PSMC4,UBC,PSMC2,PSMD2
Cortex	24hrs	aMG	4.14542e-16	12.4351	1.41317e-12	ChemicalGeneticPerturbations	PELLICCIOTTA_HDAC_IN_ANTIGEN_PRESENTATION_DN	548	17	PDIA3,PSMD8,PSME1,PSME2,PSMA2,PSMA7,PSMD11,PSMB6,PSMA1,PDIA6,PSMD14,CANX,PSMC3,PSMC1,PSMC5,PSMD7,PSMC2
Cortex	24hrs	aMG	3.21527e-16	2.15537	1.49606e-12	GObp	GO_POSITIVE_REGULATION_OF_RESPONSE_TO_STIMULUS	548	116	CD81,JUN,SERINC3,LY86,LPL,RREB1,ERH,ACTG1,PDCD5,PDIA3,HSP90AB1,YWHAB,ACTR2,MEF2C,C1QC,PRKCA,YWHAG,HINT1,PSMB1,RBPJ,C1QB,ADAM10,DAB2,ARPC2,TNF,RAC2,CSF1,SKP1,C1QA,CALM1,ITGAM,NPTN,C1QBP,PARK7,CALR,PSMD4,PSMD8,PSME1,DYNLL2,CCL4,CCL4L2,NMT1,PYCARD,CTLA4,CTSC,MAPK14,PSME2,PSMA2,BST2,BANK1,CTSB,PSMA7,PPP1CA,UBA52,TNFAIP3,MIF,ICAM1,ATP6AP1,ELMO1,IRAK2,GBA,TGFBR1,IL1B,PSMD11,CCL2,PSMB6,LAT2,FCGR1A,MBD5,…
Cortex	24hrs	aMG	3.2384e-16	7.82014	1.50683e-12	GObp	GO_REGULATION_OF_ESTABLISHMENT_OF_PLANAR_POLARITY	548	24	PSMB1,PFN1,DAB2,PSMD4,PSMD8,PSME1,PSME2,PSMA2,PSMA7,UBA52,PSMD11,PSMB6,PSMA1,PSMD14,PSMC3,PSMC1,PSMB4,PSMC5,PSMD7,PSMC4,AP2S1,UBC,PSMC2,PSMD2
Cortex	24hrs	aMG	3.40349e-16	5.78704	1.58364e-12	GObp	GO_POSITIVE_REGULATION_OF_CELLULAR_PROTEIN_CATABOLIC_PROCESS	548	31	CD81,ARIH1,PSMB1,CSNK1A1,DAB2,SKP1,PSMD4,PSMD8,PSME1,CTSC,PSME2,PSMA2,PSMA7,UBA52,TNFAIP3,GBA,PSMD11,SMAD7,PSMB6,PSMA1,PSMD14,RNF19B,PSMC3,PSMC1,PSMB4,PSMC5,PSMD7,PSMC4,UBC,PSMC2,PSMD2
Cortex	24hrs	aMG	2.75279e-15	7.56305	1.85538e-12	Reactome	REACTOME_S_PHASE	548	23	PSMB1,SKP1,PSMD4,PSMD8,PSME1,PSME2,PSMA2,PSMA7,UBA52,PSMD11,PSMB6,PCNA,PSMA1,PSMD14,CDKN1A,PSMC3,PSMC1,PSMB4,PSMC5,PSMD7,PSMC4,PSMC2,PSMD2
Cortex	24hrs	aMG	4.81125e-16	4.90617	2.23868e-12	GObp	GO_POSITIVE_REGULATION_OF_PROTEIN_CATABOLIC_PROCESS	548	36	CD81,ARIH1,PSMB1,CSNK1A1,DAB2,TNF,SKP1,PSMD4,PSMD8,PSME1,CTSC,PSME2,PSMA2,OAZ1,PSMA7,UBA52,TNFAIP3,GBA,IL1B,PSMD11,SMAD7,PSMB6,NDUFA13,PSMA1,PSMD14,RNF19B,SNX1,PSMC3,PSMC1,PSMB4,PSMC5,PSMD7,PSMC4,UBC,PSMC2,PSMD2
Cortex	24hrs	aMG	5.04773e-16	3.11236	2.34871e-12	GObp	GO_RESPONSE_TO_CYTOKINE	548	62	JUN,FCGR1B,FOS,HSP90AB1,PRKCA,JUNB,PSMB1,ADAM10,MT2A,TNF,CSF1,PSMD4,CSF2RB,PSMD8,PSME1,CSF3R,CCL4,CCL4L2,PYCARD,PSME2,PSMA2,BST2,CTSB,PID1,PSMA7,UBA52,EGR1,ICAM1,IRAK2,JUND,GBA,IL1B,PSMD11,CCL2,PSMB6,FCGR1A,NDUFA13,PSMA1,HSPA5,HSPA9,SELPLG,PSMD14,PSMC3,PSMC1,KLF2,PSMB4,GAS6,CXCL16,PSMC5,HCLS1,CD14,TUBA1B,EPRS,CCL8,IL4R,PSMD7,BIRC3,GAPDH,PSMC4,UBC,PSMC2,PSMD2
Cortex	24hrs	aMG	6.41881e-16	4.7363	2.98667e-12	GObp	GO_REGULATION_OF_PROTEIN_MODIFICATION_BY_SMALL_PROTEIN_CONJUGATION_OR_REMOVAL	548	37	HSP90AB1,PSMB1,UBXN1,SKP1,PARK7,PSMD4,PSMD8,PSME1,PSME2,GTPBP4,PSMA2,PSMA7,UBA52,TNFAIP3,EGR1,TGFBR1,PSMD11,SMAD7,PSMB6,GNL3,PSMA1,HSPA5,PSMD14,SART3,DNAJA1,TSPO,PSMC3,PSMC1,PSMB4,DUSP1,PSMC5,PSMD7,BIRC3,PSMC4,UBC,PSMC2,PSMD2
Cortex	24hrs	aMG	4.51204e-15	8.84995	3.04112e-12	Reactome	REACTOME_M_G1_TRANSITION	548	20	PSMB1,PSMD4,PSMD8,PSME1,PSME2,PSMA2,PSMA7,UBA52,PSMD11,PSMB6,PSMA1,PSMD14,PSMC3,PSMC1,PSMB4,PSMC5,PSMD7,PSMC4,PSMC2,PSMD2
Cortex	24hrs	aMG	5.28845e-15	7.36047	3.56441e-12	Reactome	REACTOME_G1_S_TRANSITION	548	23	PSMB1,SKP1,PSMD4,PSMD8,PSME1,PSME2,PSMA2,PSMA7,UBA52,PSMD11,PSMB6,PCNA,PSMA1,PSMD14,CDKN1A,PSMC3,PSMC1,PSMB4,PSMC5,PSMD7,PSMC4,PSMC2,PSMD2
Cortex	24hrs	aMG	7.2115e-15	6.29662	4.86055e-12	Reactome	REACTOME_APOPTOSIS	548	26	YWHAB,PSMB1,TNF,PSMD4,PSMD8,PSME1,DYNLL2,NMT1,PSME2,PSMA2,PSMA7,UBA52,PSMD11,PSMB6,PSMA1,PSMD14,PSMC3,PSMC1,PSMB4,PSMC5,PSMD7,PAK2,DYNLL1,PSMC4,PSMC2,PSMD2
Cortex	24hrs	aMG	1.40021e-15	7.7771	6.51517e-12	GObp	GO_INNATE_IMMUNE_RESPONSE_ACTIVATING_CELL_SURFACE_RECEPTOR_SIGNALING_PATHWAY	548	23	PSMB1,SKP1,PSMD4,PSMD8,PSME1,PSME2,PSMA2,PSMA7,UBA52,PSMD11,PSMB6,PSMA1,PSMD14,PSMC3,PSMC1,PSMB4,PSMC5,PSMD7,PAK2,PSMC4,UBC,PSMC2,PSMD2
Cortex	24hrs	aMG	2.16275e-15	10.5764	7.3728e-12	ChemicalGeneticPerturbations	NADLER_OBESITY_UP	548	18	CSTB,CTSA,CTSZ,C1QB,PFN1,CFL1,MT2A,DAD1,CTSB,NEDD8,MIF,SELPLG,TPM4,DUSP1,FCGR2A,HCLS1,LGMN,TPD52
Cortex	24hrs	aMG	1.73308e-15	2.15287	8.064e-12	GObp	GO_CELLULAR_RESPONSE_TO_ORGANIC_SUBSTANCE	548	111	CD81,JUN,FCGR1B,MSR1,FOS,SSR1,SRRT,EEF1A1,GNG5,PDCD5,HSP90AB1,MEF2C,YWHAG,JUNB,PSMB1,HNRNPA2B1,PFN1,MT2A,SPINT1,TNF,CSF1,SLC8A1,GTF2F1,PARK7,CALR,PSMD4,CSF2RB,PSMD8,PSME1,CSF3R,NCL,ADAMTS1,CCL4,CCL4L2,H2AFZ,PYCARD,MAPK14,PSME2,GNB2,PSMA2,BST2,CTSB,PID1,CPEB1,PSMA7,NEDD8,NME1,UBA52,TNFAIP3,EGR1,ICAM1,SDF2L1,ATP6AP1,IRAK2,JUND,GBA,TGFBR1,IL1B,PSMD11,FOSB,HPGD,CCL2,SMAD7,PSMB6,HNRNPU,NR6A1,FCGR1A,ND…
Cortex	24hrs	aMG	1.88922e-15	7.28996	8.79055e-12	GObp	GO_TUMOR_NECROSIS_FACTOR_MEDIATED_SIGNALING_PATHWAY	548	24	PSMB1,TNF,PSMD4,PSMD8,PSME1,PYCARD,PSME2,PSMA2,PSMA7,UBA52,PSMD11,PSMB6,PSMA1,PSMD14,PSMC3,PSMC1,PSMB4,PSMC5,PSMD7,BIRC3,PSMC4,UBC,PSMC2,PSMD2
Cortex	24hrs	aMG	2.25951e-15	6.89275	1.05135e-11	GObp	GO_REGULATION_OF_LIGASE_ACTIVITY	548	25	PSMB1,SKP1,PARK7,PSMD4,PSMD8,PSME1,PSME2,PSMA2,PSMA7,UBA52,PSMD11,SMAD7,PSMB6,PSMA1,PSMD14,PSMC3,PSMC1,PSMB4,DUSP1,PSMC5,PSMD7,PSMC4,UBC,PSMC2,PSMD2
Cortex	24hrs	aMG	2.30539e-15	8.55327	1.0727e-11	GObp	GO_REGULATION_OF_CELLULAR_AMINE_METABOLIC_PROCESS	548	21	PSMB1,PARK7,PSMD4,PSMD8,PSME1,PSME2,PSMA2,OAZ1,PSMA7,PSMD11,PSMB6,PSMA1,PSMD14,PSMC3,PSMC1,PSMB4,PSMC5,PSMD7,PSMC4,PSMC2,PSMD2
Cortex	24hrs	aMG	3.33254e-15	6.78831	1.13606e-11	ChemicalGeneticPerturbations	ZHONG_SECRETOME_OF_LUNG_CANCER_AND_FIBROBLAST	548	25	CD81,CTSZ,HSP90AB1,YWHAB,PSMB1,MDH2,PARK7,CALR,P4HB,ARHGDIA,SDC4,CTSB,PSMA7,LDHA,UBA52,ALDOA,ENO1,PSMB6,PSMA1,TPI1,PSMB4,ACTB,HSP90B1,SET,PRDX1
Cortex	24hrs	aMG	4.20597e-15	3.92168	1.95704e-11	GObp	GO_REGULATION_OF_PROTEIN_CATABOLIC_PROCESS	548	43	CD81,ARIH1,HSP90AB1,PSMB1,CSNK1A1,UBXN1,DAB2,TNF,SKP1,PARK7,PSMD4,PSMD8,PSME1,CTSC,ZNF207,PSME2,PSMA2,OAZ1,PSMA7,UBA52,TNFAIP3,GBA,IL1B,PSMD11,SMAD7,PSMB6,NDUFA13,FHIT,PSMA1,PSMD14,RNF19B,SNX1,PSMC3,PSMC1,PSMB4,DUSP1,PSMC5,PSMD7,PSMC4,GPX1,UBC,PSMC2,PSMD2
Cortex	24hrs	aMG	1.37968e-13	15.361	2.99391e-11	Biocarta	BIOCARTA_PROTEASOME_PATHWAY	548	12	PSMB1,PSMD8,PSMA2,PSMA7,PSMD11,PSMB6,PSMA1,PSMD14,PSMC3,PSMB4,PSMC4,PSMC2
Cortex	24hrs	aMG	7.26521e-15	5.21648	3.3805e-11	GObp	GO_ANTIGEN_PROCESSING_AND_PRESENTATION	548	31	FCGR1B,PDIA3,PSMB1,CALR,PSMD4,PSMD8,PSME1,DYNLL2,NCF4,PSME2,PSMA2,PSMA7,ICAM1,PSMD11,PSMB6,FCGR1A,PSMA1,PSMD14,CANX,ARF1,PSMC3,PSMC1,PSMB4,PSMC5,LGMN,PSMD7,DYNLL1,PSMC4,AP2S1,PSMC2,PSMD2
Cortex	24hrs	aMG	7.58585e-15	7.65564	3.5297e-11	GObp	GO_REGULATION_OF_PROTEIN_UBIQUITINATION_INVOLVED_IN_UBIQUITIN_DEPENDENT_PROTEIN_CATABOLIC_PROCESS	548	22	PSMB1,SKP1,PSMD4,PSMD8,PSME1,PSME2,PSMA2,PSMA7,UBA52,PSMD11,PSMB6,PSMA1,PSMD14,PSMC3,PSMC1,PSMB4,PSMC5,PSMD7,PSMC4,UBC,PSMC2,PSMD2
Cortex	24hrs	aMG	1.04453e-14	3.50393	3.56082e-11	ChemicalGeneticPerturbations	SWEET_LUNG_CANCER_KRAS_UP	548	48	MSR1,CSTB,CTSA,CTSZ,SIRPA,HK2,C1QC,HMGN1,UBXN1,C1QB,PFN1,MT2A,SPINT1,SSR4,CASK,PSMD4,BSG,PSME1,NCL,NMT1,NOP56,CTSC,CTSB,LDHA,CYB5R3,ALDOA,FKBP2,MANF,EIF3E,CNDP2,GNL3,ARL8B,LCP1,HSPA5,HSPA9,CDKN1A,TPM4,TPI1,FCGR2B,EIF4G1,CD14,PHB2,VMP1,IL4R,DUSP6,SLC25A5,GAPDH,CD63
Cortex	24hrs	aMG	1.1068e-14	9.77517	3.77307e-11	ChemicalGeneticPerturbations	DIRMEIER_LMP1_RESPONSE_EARLY	548	18	JUN,EEF1A1,HSP90AB1,JUNB,TNF,CCL4,ZFP36,TNFAIP3,EGR1,ICAM1,JUND,CD83,KLF6,LCP1,BTG2,ACTB,BIRC3,BCL2A1
Cortex	24hrs	aMG	1.1068e-14	9.77517	3.77307e-11	ChemicalGeneticPerturbations	ZHONG_SECRETOME_OF_LUNG_CANCER_AND_ENDOTHELIUM	548	18	CTSA,CTSZ,YWHAG,SRSF2,MDH2,ARHGDIA,SDC4,TUBB,LDHA,ALDOA,ENO1,PCNA,TKT,TPI1,ACTB,TUBA1C,GAPDH,PRDX1
Cortex	24hrs	aMG	2.09473e-13	5.5142	3.89619e-11	Kegg	KEGG_ALZHEIMERS_DISEASE	548	26	LPL,NDUFC1,ADAM10,TNF,COX7A2,CALM1,UQCR10,COX7B,COX6B1,NDUFV3,NDUFB10,COX5B,PSENEN,IL1B,NDUFAB1,COX7C,UQCRQ,COX4I1,NDUFC2,UQCR11,COX6A1,UQCRB,NDUFB8,NDUFA4,GAPDH,NDUFA2
Cortex	24hrs	aMG	1.15514e-14	4.82774	3.93787e-11	ChemicalGeneticPerturbations	PENG_RAPAMYCIN_RESPONSE_DN	548	33	HSPA4,HSP90AB1,COX7B,C1QBP,PSMD8,NMT1,NOP56,CTSC,CCT5,NME1,STIP1,GSPT1,ATP1B3,PSMD11,MANF,EIF4G2,HSPA5,PDIA6,HSPA9,PSMD14,DNAJA1,PTPN1,ARF1,EIF2S1,TNPO1,CCT2,HSP90B1,HSPE1,EIF4G1,DDX21,NARS,CCT6A,PSMC2
Cortex	24hrs	aMG	1.17328e-14	3.08146	3.99972e-11	ChemicalGeneticPerturbations	CASORELLI_ACUTE_PROMYELOCYTIC_LEUKEMIA_DN	548	57	SERINC3,HSPA4,CTSZ,SSR1,RRP1,PDIA3,ACAT1,HSP90AB1,ACTR2,MEF2C,LMAN2,HNRNPA2B1,FUBP1,HNRNPA3,HNRNPAB,NAP1L4,SERBP1,INPP4B,CSF2RB,HADHA,LUC7L,MAPK14,TUBB,LUC7L3,EIF5B,CCT5,TECR,LDHA,NME1,STIP1,TMEM176B,ALDOA,ARID5B,EIF2S2,ENO1,NOLC1,HPGD,PSMB6,HNRNPU,PSMA1,PDIA6,HSPA9,PSMC3,PGD,TPI1,EIF2S1,ACTB,EIF5A,SLC25A4,GLUL,EPRS,DHX9,GAPDH,TPD52,SLA,EID1,M6PR
Cortex	24hrs	aMG	9.55319e-15	5.97372	4.4451e-11	GObp	GO_NEGATIVE_REGULATION_OF_CANONICAL_WNT_SIGNALING_PATHWAY	548	27	PSMB1,CSNK1A1,DAB2,PSMD4,PSMD8,PSME1,HDAC1,MAPK14,PSME2,PSMA2,PSMA7,UBA52,EGR1,PTPRO,PSMD11,PSMB6,PSMA1,PSMD14,PSMC3,PSMC1,PSMB4,PSMC5,PSMD7,PSMC4,UBC,PSMC2,PSMD2
Cortex	24hrs	aMG	1.00148e-14	8.53388	4.65987e-11	GObp	GO_OXIDATIVE_PHOSPHORYLATION	548	20	NDUFC1,UQCR10,COX7B,COX6B1,NDUFV3,NDUFB10,COX5B,NDUFAB1,NDUFA13,COX7C,UQCRQ,COX4I1,NDUFC2-KCTD14,NDUFC2,UQCR11,COX6A1,UQCRB,NDUFB8,NDUFA4,NDUFA2
Cortex	24hrs	aMG	8.5173e-14	6.54264	5.74066e-11	Reactome	REACTOME_SIGNALING_BY_THE_B_CELL_RECEPTOR_BCR	548	23	PSMB1,SKP1,CALM1,PSMD4,PSMD8,PSME1,PSME2,PSMA2,PSMA7,UBA52,PSMD11,PSMB6,PSMA1,PSMD14,CDKN1A,PSMC3,PSMC1,PSMB4,PSMC5,PSMD7,PSMC4,PSMC2,PSMD2
Cortex	24hrs	aMG	1.69373e-14	3.51688	5.77393e-11	ChemicalGeneticPerturbations	SPIELMAN_LYMPHOBLAST_EUROPEAN_VS_ASIAN_UP	548	47	CSTB,RREB1,RRP1,ERH,ACTG1,PDCD5,HK2,HNRNPA2B1,HMGN1,PFN1,CALM1,DAPP1,C1QBP,PARK7,CALR,PSMD4,FKBP3,COX6B1,HDAC1,LUC7L,TUBB,PSME2,BANF1,OAZ1,SNRPD1,TECR,COX5B,CYB5R3,TCEA1,FKBP2,HNRNPU,UBL5,UQCRQ,HSPA9,COX4I1,ARF1,MYL6,COX6A1,TRA2A,SRGN,NDUFB8,CDK11A,CACYBP,AKR1A1,GPX1,NDUFA2,NAP1L1
Cortex	24hrs	aMG	1.63138e-14	2.42257	7.59082e-11	GObp	GO_PHOSPHORYLATION	548	83	ULK2,NDUFC1,YWHAB,MEF2C,HK2,PRKCA,PSMB1,CSNK1A1,CDK6,ADAM10,TNF,SKP1,CALM1,CASK,UQCR10,COX7B,NPTN,PSMD4,CSF2RB,MERTK,PSMD8,PSME1,COX6B1,MAPK14,PSME2,PSMA2,PSMA7,NDUFV3,NDUFB10,LDHA,NME1,COX5B,UBA52,ALDOA,IRAK2,TGFBR1,ENO1,IL1B,PSMD11,NDUFAB1,CCL2,SMAD7,PSMB6,NDUFA13,MEF2A,CUX1,MAP3K5,CDK11B,COX7C,PSMA1,UQCRQ,PSMD14,COX4I1,PTPN1,NDUFC2-KCTD14,NDUFC2,CDC37,PSMC3,PSMC1,MAK,TPI1,PSMB4,GAS6,EIF2S1,UQC…
Cortex	24hrs	aMG	2.2348e-14	6.9275	1.03985e-10	GObp	GO_POSITIVE_REGULATION_OF_CANONICAL_WNT_SIGNALING_PATHWAY	548	23	PSMB1,RBPJ,PSMD4,PSMD8,PSME1,PSME2,PSMA2,PSMA7,UBA52,PSMD11,PSMB6,PSMA1,TRPM4,PSMD14,PSMC3,PSMC1,PSMB4,PSMC5,PSMD7,PSMC4,UBC,PSMC2,PSMD2
Cortex	24hrs	aMG	2.12943e-12	4.83871	1.06472e-10	Hallmark	HALLMARK_TNFA_SIGNALING_VIA_NFKB	548	27	JUN,FOS,JUNB,TNF,CSF1,CCL4,SDC4,ZFP36,RHOB,TNFAIP3,EGR1,ICAM1,CD83,IL1B,FOSB,CCL2,KLF6,RCAN1,BTG2,ATF3,CDKN1A,RNF19B,KLF2,DUSP1,BIRC3,BCL2A1,IER5
Cortex	24hrs	aMG	2.12943e-12	4.83871	1.06472e-10	Hallmark	HALLMARK_OXIDATIVE_PHOSPHORYLATION	548	27	NDUFC1,ACAT1,MDH2,COX7A2,UQCR10,COX7B,HADHA,COX6B1,LDHA,COX5B,CYB5R3,ATP6AP1,NDUFAB1,COX7C,UQCRQ,HSPA9,COX4I1,NDUFC2,UQCR11,SLC25A4,COX6A1,UQCRB,PHB2,NDUFB8,SLC25A5,NDUFA4,NDUFA2
Cortex	24hrs	aMG	2.33601e-14	2.26449	1.08694e-10	GObp	GO_REGULATION_OF_CELL_DEATH	548	93	JUN,SERINC3,ARL6IP1,TGM2,PDCD5,PDIA3,HSP90AB1,YWHAB,MEF2C,PRKCA,YWHAG,JUNB,HBA2,HBA1,CFL1,DAB2,DAD1,TNF,SERBP1,DOCK8,C1QBP,PARK7,CALR,P4HB,MERTK,ARHGDIA,NCL,DYNLL2,NMT1,HDAC1,PYCARD,CTLA4,CTSC,CTSB,RHOB,PPP1CA,LDHA,NME1,PSENEN,PA2G4,UBA52,TNFAIP3,MIF,EGR1,ICAM1,SDF2L1,JUND,RSL1D1,TGFBR1,BAG1,IL1B,ANP32B,CCL2,NDUFA13,WWOX,ERP29,MAP3K5,BTG2,SRGAP2,ATF3,TXN,ITGB1,HSPA5,HSPA9,CDKN1A,DNAJA1,PTPN1,TSPO…
Cortex	24hrs	aMG	2.36177e-14	3.81108	1.09893e-10	GObp	GO_POSITIVE_REGULATION_OF_CATABOLIC_PROCESS	548	42	CD81,ARIH1,PSMB1,CSNK1A1,DAB2,TNF,SKP1,TBC1D5,PARK7,PSMD4,PSMD8,PSME1,CTSC,ZFP36,PSME2,PSMA2,OAZ1,PSMA7,UBA52,TNFAIP3,GBA,IL1B,PSMD11,SMAD7,PSMB6,NDUFA13,BTG2,PSMA1,RALB,PSMD14,PTPN1,RNF19B,SNX1,PSMC3,PSMC1,PSMB4,PSMC5,PSMD7,PSMC4,UBC,PSMC2,PSMD2
Cortex	24hrs	aMG	3.0604e-14	3.93871	1.42401e-10	GObp	GO_POSITIVE_REGULATION_OF_DEFENSE_RESPONSE	548	40	LPL,MEF2C,PSMB1,TNF,SKP1,ITGAM,PSMD4,PSMD8,PSME1,CCL4,CCL4L2,PYCARD,PSME2,PSMA2,CTSB,PSMA7,UBA52,TNFAIP3,IRAK2,IL1B,PSMD11,CCL2,PSMB6,PSMA1,PSMD14,PSMC3,PSMC1,PSMB4,PSMC5,HSP90B1,CD14,LGMN,CCL8,PSMD7,PAK2,BIRC3,PSMC4,UBC,PSMC2,PSMD2
Cortex	24hrs	aMG	4.52733e-14	4.06569	1.54337e-10	ChemicalGeneticPerturbations	WONG_EMBRYONIC_STEM_CELL_CORE	548	38	HNRNPAB,EIF4A1,NHP2,NOP10,NCL,HDAC1,CTSC,SSB,BANF1,SNRPD1,PSMA7,CCT5,NDUFB10,COX5B,PA2G4,STIP1,EIF2S2,ENO1,NDUFAB1,PSMB6,GNL3,ERP29,PCNA,HSPA9,PSMD14,ANP32E,BTF3,UQCR11,PDIA4,HSPE1,SET,EIF3A,DHX9,NDUFB8,SLC25A5,MRPS28,PRDX1,NAP1L1
Cortex	24hrs	aMG	3.44381e-14	7.16846	1.6024e-10	GObp	GO_POSITIVE_REGULATION_OF_LIGASE_ACTIVITY	548	22	PSMB1,SKP1,PSMD4,PSMD8,PSME1,PSME2,PSMA2,PSMA7,UBA52,PSMD11,PSMB6,PSMA1,PSMD14,PSMC3,PSMC1,PSMB4,PSMC5,PSMD7,PSMC4,UBC,PSMC2,PSMD2
Cortex	24hrs	aMG	4.16919e-14	6.13738	1.93993e-10	GObp	GO_T_CELL_RECEPTOR_SIGNALING_PATHWAY	548	25	PSMB1,SKP1,PSMD4,PSMD8,PSME1,PSME2,PSMA2,PSMA7,UBA52,PSMD11,PSMB6,PSMA1,PSMD14,PDE4D,PSMC3,PSMC1,PSMB4,INPP5D,PSMC5,PSMD7,PAK2,PSMC4,UBC,PSMC2,PSMD2
Cortex	24hrs	aMG	5.85986e-14	2.39936	1.99763e-10	ChemicalGeneticPerturbations	CHEN_METABOLIC_SYNDROM_NETWORK	548	81	JUN,MSR1,LY86,CSTB,FOS,LPL,OLFML3,ACTG1,MS4A6A,SIRPA,HK2,C1QC,C1QB,CFL1,ARPC2,TBC1D9,TNF,RAC2,SLC8A1,DOCK8,DAPP1,SH3BGRL3,CALR,PSMD8,ARHGDIA,CSF3R,CCL4,HEPH,RGS2,PYCARD,RHOH,NCF4,SLAMF9,TUBB,CTSB,DOCK11,CLIC1,DOCK10,SDF2L1,GATM,PTPRO,GBA,GUSB,CD83,CCL2,CNDP2,LAT2,ASAH1,FCGR1A,STAB1,LCP1,PCNA,ATF3,SELPLG,SLC9A9,PTPN1,PDE3B,SNX1,ARPC1B,CXCL16,EVI2A,INPP5D,FCGR2A,HCLS1,SRGN,LACTB,CD14,CMTM3,LGMN,PLX…
Cortex	24hrs	aMG	4.8629e-14	3.13472	2.26271e-10	GObp	GO_CELLULAR_RESPONSE_TO_CYTOKINE_STIMULUS	548	53	FCGR1B,HSP90AB1,PSMB1,MT2A,TNF,CSF1,PSMD4,CSF2RB,PSMD8,PSME1,CSF3R,CCL4,CCL4L2,PYCARD,PSME2,PSMA2,BST2,PID1,PSMA7,UBA52,EGR1,ICAM1,IRAK2,GBA,IL1B,PSMD11,CCL2,PSMB6,FCGR1A,NDUFA13,PSMA1,HSPA5,HSPA9,SELPLG,PSMD14,PSMC3,PSMC1,KLF2,PSMB4,GAS6,PSMC5,HCLS1,TUBA1B,EPRS,CCL8,IL4R,PSMD7,BIRC3,GAPDH,PSMC4,UBC,PSMC2,PSMD2
Cortex	24hrs	aMG	7.36453e-14	11.439	2.51057e-10	ChemicalGeneticPerturbations	JIANG_AGING_HYPOTHALAMUS_UP	548	15	NDUFC1,HBA2,HBA1,COX7A2,COX7B,C1QBP,ANP32B,PSMD14,ACTB,CCT6A,AKR1A1,PRDX1,HEXB,TPD52,M6PR
Cortex	24hrs	aMG	4.03582e-13	8.1666	2.72015e-10	Reactome	REACTOME_RESPIRATORY_ELECTRON_TRANSPORT	548	18	NDUFC1,COX7B,COX6B1,NDUFV3,NDUFB10,COX5B,NDUFAB1,NDUFA13,COX7C,UQCRQ,COX4I1,NDUFC2,UQCR11,COX6A1,UQCRB,NDUFB8,NDUFA4,NDUFA2
Cortex	24hrs	aMG	8.32455e-14	3.90461	2.83784e-10	ChemicalGeneticPerturbations	GRUETZMANN_PANCREATIC_CANCER_UP	548	39	ARL6IP1,CSTB,CSNK1A1,HBA2,HMGN4,PFN1,ADAM10,BZW1,ARHGDIA,NMT1,CTSC,TUBB,BST2,LDHA,TNFAIP3,CLIC1,MYL12A,ATP6AP1,ATP1B3,ENO1,HPGD,HNRNPU,LCP1,RALB,ATF3,PSMD14,DNAJA1,TSPO,SRGN,LGMN,IL4R,DHX9,DUSP6,PAK2,BIRC3,FCGR3A,PRDX1,GPX1,TXNRD1
Cortex	24hrs	aMG	7.69032e-14	4.66241	3.5783e-10	GObp	GO_POSITIVE_REGULATION_OF_INNATE_IMMUNE_RESPONSE	548	32	PSMB1,SKP1,ITGAM,PSMD4,PSMD8,PSME1,PYCARD,PSME2,PSMA2,CTSB,PSMA7,UBA52,TNFAIP3,IRAK2,PSMD11,PSMB6,PSMA1,PSMD14,PSMC3,PSMC1,PSMB4,PSMC5,HSP90B1,CD14,LGMN,PSMD7,PAK2,BIRC3,PSMC4,UBC,PSMC2,PSMD2
Cortex	24hrs	aMG	1.9405e-12	5.0373	3.60933e-10	Kegg	KEGG_HUNTINGTONS_DISEASE	548	26	TGM2,NDUFC1,CREB5,COX7A2,UQCR10,COX7B,COX6B1,HDAC1,NDUFV3,NDUFB10,COX5B,NDUFAB1,COX7C,UQCRQ,COX4I1,NDUFC2,UQCR11,SLC25A4,COX6A1,UQCRB,NDUFB8,SLC25A5,NDUFA4,AP2S1,GPX1,NDUFA2
Cortex	24hrs	aMG	1.11458e-13	5.43675	3.7996e-10	ChemicalGeneticPerturbations	LI_AMPLIFIED_IN_LUNG_CANCER	548	27	ARL6IP1,CSTB,SPINT1,SSR4,CALR,P4HB,PSMD8,EIF3C,CCT5,LDHA,NME1,MIF,ALDOA,ENO1,RPL35,TALDO1,CCT3,HSPA5,TKT,CANX,PGD,PSMB4,COX6A1,HSPE1,AKR1A1,PRDX1,TXNRD1
Cortex	24hrs	aMG	1.15e-13	3.57591	3.92037e-10	ChemicalGeneticPerturbations	GARY_CD5_TARGETS_DN	548	43	HSPA4,H3F3B,SRRT,PDCD5,USP16,HINT1,FUBP1,TBC1D9,SRSF2,SERBP1,BZW1,EIF3J,NOP56,RHOH,ZNF207,GTPBP4,PSMA7,NME1,STIP1,RBM3,SDF2L1,MANF,NOLC1,NAV2,CNDP2,NOP58,HSPA5,PDIA6,DNAJA1,SNRPD3,PSMC3,DDX27,EIF2S1,TNPO1,FCGR2B,RBM8A,PSMC5,HSP90B1,DNAJB11,DHX9,TXNIP,CCT6A,PSMC2
Cortex	24hrs	aMG	2.35388e-12	5.9288	4.37821e-10	Kegg	KEGG_PARKINSONS_DISEASE	548	22	NDUFC1,COX7A2,UQCR10,COX7B,PARK7,COX6B1,NDUFV3,NDUFB10,COX5B,NDUFAB1,COX7C,UQCRQ,COX4I1,NDUFC2,UQCR11,SLC25A4,COX6A1,UQCRB,NDUFB8,SLC25A5,NDUFA4,NDUFA2
Cortex	24hrs	aMG	1.12398e-13	7.62602	5.22987e-10	GObp	GO_ELECTRON_TRANSPORT_CHAIN	548	20	NDUFC1,UQCR10,COX7B,COX6B1,NDUFV3,NDUFB10,COX5B,NDUFAB1,NDUFA13,COX7C,UQCRQ,COX4I1,NDUFC2-KCTD14,NDUFC2,UQCR11,COX6A1,UQCRB,NDUFB8,NDUFA4,NDUFA2
Cortex	24hrs	aMG	1.21163e-13	6.14439	5.63773e-10	GObp	GO_NON_CANONICAL_WNT_SIGNALING_PATHWAY	548	24	PSMB1,PFN1,CALM1,PSMD4,PSMD8,PSME1,PSME2,PSMA2,PSMA7,UBA52,PSMD11,PSMB6,PSMA1,PSMD14,PSMC3,PSMC1,PSMB4,PSMC5,PSMD7,PSMC4,AP2S1,UBC,PSMC2,PSMD2
Cortex	24hrs	aMG	1.93063e-13	4.27592	6.58152e-10	ChemicalGeneticPerturbations	GRADE_COLON_AND_RECTAL_CANCER_UP	548	34	HSPA4,PSMB1,HNRNPA2B1,EIF4A1,SRSF2,CCT8,PSMD4,H2AFZ,NOP56,SSB,PSMA2,H2AFY,CTSB,CCT5,LDHA,PA2G4,EIF2S2,TALDO1,EIF3E,PCNA,PSMA1,HSPA9,TKT,PSMD14,RHEB,TPI1,DDX27,CNBP,HSPE1,CHCHD2,EPRS,SET,DHX9,PRDX1
Cortex	24hrs	aMG	1.93436e-13	4.51556	6.59424e-10	ChemicalGeneticPerturbations	MCLACHLAN_DENTAL_CARIES_UP	548	32	MSR1,MS4A6A,C1QB,MT2A,RAC2,C1QA,SSR4,CSF2RB,RGS2,NCF4,CTSC,CTSB,TNFAIP3,ICAM1,IL1B,CCL2,STAB1,LCP1,ARPC1B,EVI2A,FCGR2C,FCGR2A,FCGR2B,HCLS1,SRGN,CD14,CCL8,BIRC3,FCGR3B,BCL2A1,C5AR1,SLA
Cortex	24hrs	aMG	2.00359e-13	6.01549	6.83022e-10	ChemicalGeneticPerturbations	DANG_MYC_TARGETS_UP	548	24	HSPA4,CSTB,PSMB1,HNRNPA2B1,EIF4A1,SRSF2,NCL,H2AFZ,EIF3C,CTSC,CCT5,LDHA,NME1,PA2G4,ENO1,GNL3,PCNA,TXN,HSPA9,SNRPD3,EIF2S1,HSPE1,GAPDH,NAP1L1
Cortex	24hrs	aMG	2.40845e-13	3.27741	8.2104e-10	ChemicalGeneticPerturbations	SCHAEFFER_PROSTATE_DEVELOPMENT_6HR_DN	548	47	RRP1,HSP90AB1,CHD9,CSNK1A1,PFN1,CFL1,EIF4A1,NFIA,SKP1,SLC8A1,CALR,BZW1,P4HB,ARHGDIA,EIF3J,SMARCA5,DYNLL2,RHOB,PPP1CA,GSPT1,SDF2L1,ARID5B,MANF,NOLC1,HNRNPU,MORF4L1,CHD1,CDC37L1,NUCKS1,ITGB1,FOXN3,CANX,DHX36,SNRPD3,KLF2,ITGA6,PDIA4,HSP90B1,LACTB,DNAJB11,SET,EIF3A,NDUFA4,PSMC4,ZFHX3,GOLGA4,PSMD2
Cortex	24hrs	aMG	1.77807e-13	5.14659	8.27337e-10	GObp	GO_ANTIGEN_RECEPTOR_MEDIATED_SIGNALING_PATHWAY	548	28	MEF2C,PSMB1,SKP1,PSMD4,PSMD8,PSME1,CTLA4,PSME2,PSMA2,PSMA7,UBA52,PSMD11,PSMB6,LAT2,PSMA1,PSMD14,PDE4D,PSMC3,PSMC1,PSMB4,INPP5D,PSMC5,PSMD7,PAK2,PSMC4,UBC,PSMC2,PSMD2
Cortex	24hrs	aMG	2.43656e-13	7.82763	8.30624e-10	ChemicalGeneticPerturbations	FLECHNER_BIOPSY_KIDNEY_TRANSPLANT_REJECTED_VS_OK_UP	548	19	LY86,C1QB,ADAM15,RAC2,CD52,RHOH,FCGR1A,LCP1,ACTB,INPP5D,GLUL,HCLS1,CD14,IL4R,FCGR3A,GAPDH,UBC,CCND3,SLA
Cortex	24hrs	aMG	1.3766e-12	3.12539	9.27828e-10	Reactome	REACTOME_ADAPTIVE_IMMUNE_SYSTEM	548	47	CD81,FCGR1B,CTSA,PDIA3,YWHAB,PSMB1,SKP1,CALM1,CALR,PSMD4,PSMD8,PSME1,DYNLL2,CTLA4,NCF4,CTSC,PSME2,PSMA2,CTSB,PSMA7,UBA52,ICAM1,PSMD11,PSMB6,FCGR1A,PSMA1,ITGB1,HSPA5,PSMD14,CDKN1A,CANX,ARF1,PSMC3,PSMC1,PSMB4,FCGR2B,PSMC5,LGMN,PSMD7,PAK2,DYNLL1,FCGR3A,PSMC4,AP2S1,SEC61G,PSMC2,PSMD2
Cortex	24hrs	aMG	2.94591e-13	3.16445	1.00426e-09	ChemicalGeneticPerturbations	FLECHNER_BIOPSY_KIDNEY_TRANSPLANT_OK_VS_DONOR_UP	548	49	SERINC3,H3F3B,ACTG1,PDIA3,ACTR2,HNRNPA2B1,HMGN1,HMGN4,SRSF2,SERBP1,NPTN,PARK7,BZW1,ANK2,H2AFZ,PSME2,TMED5,LUC7L3,CYB5R3,RBM3,ARID5B,PSMD11,HPGD,RCAN1,SLC1A1,RERE,HSPA5,PSMD14,DNAJA1,TSPO,SNRPD3,TMED10,TNPO1,CCT2,COPB1,PSMC5,BBX,CNBP,TRA2A,SRGN,HSPE1,TUBA1B,CLASP2,NARS,DHX9,BIRC3,DYNLL1,FRMD4B,NAP1L1
Cortex	24hrs	aMG	2.28217e-13	2.84385	1.0619e-09	GObp	GO_REGULATION_OF_CATABOLIC_PROCESS	548	58	CD81,CTSA,EEF1A1,ARIH1,ULK2,HSP90AB1,PSMB1,CSNK1A1,UBXN1,DAB2,TNF,SKP1,TBC1D5,PARK7,PSMD4,PSMD8,PSME1,SNX6,CTSC,ZNF207,ZFP36,PSME2,PSMA2,OAZ1,PSMA7,PPP1CA,UBA52,TNFAIP3,GBA,IL1B,PSMD11,SMAD7,PSMB6,NDUFA13,FHIT,BTG2,PSMA1,RALB,ITGB1,PSMD14,PTPN1,TSPO,PDE3B,RNF19B,SNX1,PSMC3,PSMC1,PSMB4,DUSP1,PSMC5,VMP1,PSMD7,GAPDH,PSMC4,GPX1,UBC,PSMC2,PSMD2
Cortex	24hrs	aMG	2.32306e-13	5.09434	1.08092e-09	GObp	GO_NEGATIVE_REGULATION_OF_WNT_SIGNALING_PATHWAY	548	28	PSMB1,CSNK1A1,DAB2,PSMD4,PSMD8,PSME1,HDAC1,MAPK14,PSME2,PSMA2,PSMA7,UBA52,EGR1,PTPRO,PSMD11,PSMB6,WWOX,PSMA1,PSMD14,PSMC3,PSMC1,PSMB4,PSMC5,PSMD7,PSMC4,UBC,PSMC2,PSMD2
Cortex	24hrs	aMG	3.24452e-13	5.41802	1.10606e-09	ChemicalGeneticPerturbations	YAO_TEMPORAL_RESPONSE_TO_PROGESTERONE_CLUSTER_13	548	26	NDUFC1,PDCD5,ROMO1,UQCR10,COX7B,PARK7,FKBP3,H2AFZ,NMT1,PSME2,NDUFV3,NEDD8,TMED3,COX5B,DYNLRB1,RBM3,NDUFAB1,MRPL52,UBL5,NDUFA13,TKT,UQCR11,COX6A1,UQCRB,NDUFB8,NDUFA2
Cortex	24hrs	aMG	4.30769e-13	4.05981	1.46849e-09	ChemicalGeneticPerturbations	TARTE_PLASMA_CELL_VS_PLASMABLAST_DN	548	35	HSPA4,SSR1,COX7B,PSMD4,CD52,PSME2,PSMA2,CCT5,NME1,CLIC1,PDAP1,GSPT1,ELMO1,ATP1B3,BAG1,HPGD,PCNA,PSMA1,TXN,ITGB1,HSPA9,TKT,PSMD14,CDKN1A,PTPN1,SNRPD3,EIF2S1,CCT2,PSMC5,HSPE1,NARS,EIF3A,PAK2,CCT6A,SLA
Cortex	24hrs	aMG	3.45223e-13	2.78616	1.60632e-09	GObp	GO_REGULATION_OF_DEFENSE_RESPONSE	548	59	LPL,HSP90AB1,MEF2C,PSMB1,TNFAIP8L2,TNF,SKP1,ITGAM,C1QBP,PARK7,PSMD4,PSMD8,PSME1,SNX6,CCL4,CCL4L2,PYCARD,MAPK14,PSME2,PSMA2,CTSB,SNRPD1,PSMA7,UBA52,TNFAIP3,ELMO1,IRAK2,GBA,IL1B,PSMD11,CCL2,PSMB6,MBD5,PSMA1,PSMD14,PTPN1,ARF1,CDC37,PSMC3,PSMC1,PSMB4,EIF2S1,PSMC5,HSP90B1,CD14,PHB2,LGMN,CCL8,PSMD7,PAK2,BIRC3,FCGR3B,C5AR1,PSMC4,AP2S1,GPX1,UBC,PSMC2,PSMD2
Cortex	24hrs	aMG	4.15937e-12	6.07007	2.80341e-09	Reactome	REACTOME_CELL_CYCLE_CHECKPOINTS	548	21	PSMB1,PSMD4,PSMD8,PSME1,PSME2,PSMA2,PSMA7,UBA52,PSMD11,PSMB6,PSMA1,PSMD14,CDKN1A,PSMC3,PSMC1,PSMB4,PSMC5,PSMD7,PSMC4,PSMC2,PSMD2
Cortex	24hrs	aMG	6.03189e-13	3.75209	2.80664e-09	GObp	GO_POSITIVE_REGULATION_OF_PROTEOLYSIS	548	38	ARIH1,PDCD5,PSMB1,CSNK1A1,DAB2,TNF,SKP1,PSMD4,PSMD8,PSME1,PYCARD,CTSC,PSME2,PSMA2,PSMA7,UBA52,GBA,IL1B,PSMD11,ANP32B,SMAD7,PSMB6,NDUFA13,MAP3K5,PSMA1,PSMD14,SART3,RNF19B,PSMC3,PSMC1,PSMB4,PSMC5,HSPE1,PSMD7,PSMC4,UBC,PSMC2,PSMD2
Cortex	24hrs	aMG	8.5939e-13	6.2089	2.92966e-09	ChemicalGeneticPerturbations	KARLSSON_TGFB1_TARGETS_UP	548	22	ACTG1,CCT8,SLC8A1,GTPBP4,EIF2S2,RSL1D1,NOLC1,GNL3,KLF6,CCT3,HSPA9,TPM4,EIF2S1,CCT2,REPS2,EIF5A,HSPE1,EIF4G1,DDX21,SET,EIF3A,CACYBP
Cortex	24hrs	aMG	7.84823e-13	4.55622	3.65178e-09	GObp	GO_REGULATION_OF_CANONICAL_WNT_SIGNALING_PATHWAY	548	30	PSMB1,CSNK1A1,RBPJ,DAB2,PSMD4,PSMD8,PSME1,HDAC1,MAPK14,PSME2,PSMA2,PSMA7,PPP1CA,UBA52,EGR1,PTPRO,PSMD11,PSMB6,PSMA1,TRPM4,PSMD14,PSMC3,PSMC1,PSMB4,PSMC5,PSMD7,PSMC4,UBC,PSMC2,PSMD2
Cortex	24hrs	aMG	1.07706e-12	3.47408	3.6717e-09	ChemicalGeneticPerturbations	THUM_SYSTOLIC_HEART_FAILURE_UP	548	41	MSR1,HSPA4,TGM2,ACTG1,HSP90AB1,MS4A6A,ACTR2,C1QC,C1QB,TNFAIP8L2,NFIA,RAC2,C1QA,SLC8A1,BSG,ARHGDIA,CD52,CCL4,GPR34,CTSC,RNASE4,CTSB,CYB5R3,ENO1,FLI1,ARL8B,LCP1,RALB,NUCKS1,ITGB1,PDIA6,SLC9A9,ARF1,ACTB,CCT2,FCGR2C,HSP90B1,SRGN,CD14,CCL8,M6PR
Cortex	24hrs	aMG	8.38767e-13	5.65931	3.90278e-09	GObp	GO_POSITIVE_REGULATION_OF_WNT_SIGNALING_PATHWAY	548	24	PSMB1,RBPJ,DAB2,PSMD4,PSMD8,PSME1,PSME2,PSMA2,PSMA7,UBA52,PSMD11,PSMB6,PSMA1,TRPM4,PSMD14,PSMC3,PSMC1,PSMB4,PSMC5,PSMD7,PSMC4,UBC,PSMC2,PSMD2
Cortex	24hrs	aMG	9.36657e-13	2.40707	4.35826e-09	GObp	GO_NEGATIVE_REGULATION_OF_PROTEIN_METABOLIC_PROCESS	548	73	JUN,ARL6IP1,CSTB,SRRT,PDCD5,HSP90AB1,YWHAB,YWHAG,PSMB1,HNRNPA2B1,UBXN1,SPINT1,TNF,CALM1,PARK7,CALR,PSMD4,PSMD8,PSME1,SNX6,RGS2,PYCARD,ZNF207,ZFP36,PSME2,GTPBP4,PSMA2,BST2,H2AFY,BANK1,PID1,CPEB1,PSMA7,MPHOSPH10,UBA52,TNFAIP3,MIF,GBA,IL1B,PSMD11,SMAD7,EIF3E,PSMB6,FHIT,BTG2,PSMA1,ATF3,PSMD14,PDE4D,CDKN1A,DNAJA1,PTPN1,TSPO,PSMC3,PSMC1,PSMB4,GAS6,EIF2S1,DUSP1,INPP5D,PSMC5,EPRS,SET,DUSP6,PSMD7,PAK2,BIR…
Cortex	24hrs	aMG	9.51056e-13	3.77825	4.42526e-09	GObp	GO_NEGATIVE_REGULATION_OF_TRANSFERASE_ACTIVITY	548	37	YWHAG,PSMB1,PARK7,PSMD4,PSMD8,PSME1,SNX6,RGS2,PYCARD,PSME2,PSMA2,H2AFY,PSMA7,UBA52,TNFAIP3,GBA,IL1B,PSMD11,SMAD7,PSMB6,PSMA1,PSMD14,CDKN1A,DNAJA1,PTPN1,PSMC3,PSMC1,PSMB4,DUSP1,PSMC5,DUSP6,PSMD7,PAK2,PSMC4,UBC,PSMC2,PSMD2
Cortex	24hrs	aMG	1.11168e-12	4.6403	5.17262e-09	GObp	GO_PROTEIN_FOLDING	548	29	TMX4,PDIA3,HSP90AB1,TMX3,CCT8,CALR,FKBP3,P4HB,GNB2,CCT5,FKBP2,BAG1,CDC37L1,ERP29,CCT3,TXN,HSPA5,PDIA6,HSPA9,CANX,DNAJA1,CDC37,CCT2,PDIA4,HSP90B1,HSPE1,DNAJB11,CCT6A,MLEC
Cortex	24hrs	aMG	1.28614e-12	4.93746	5.98442e-09	GObp	GO_POSITIVE_REGULATION_OF_PROTEIN_MODIFICATION_BY_SMALL_PROTEIN_CONJUGATION_OR_REMOVAL	548	27	PSMB1,SKP1,PSMD4,PSMD8,PSME1,PSME2,PSMA2,PSMA7,UBA52,PSMD11,SMAD7,PSMB6,GNL3,PSMA1,HSPA5,PSMD14,SART3,PSMC3,PSMC1,PSMB4,PSMC5,PSMD7,BIRC3,PSMC4,UBC,PSMC2,PSMD2
Cortex	24hrs	aMG	2.07978e-12	7.50188	7.08999e-09	ChemicalGeneticPerturbations	TAKAO_RESPONSE_TO_UVB_RADIATION_UP	548	18	HNRNPA2B1,FUBP1,UBXN1,COX7A2,COX7B,H2AFZ,COX5B,MANF,TXN,COX4I1,CDC37,COX6A1,DYNLL1,NDUFA4,GPX1,UBC,PLCL1,NAP1L1
Cortex	24hrs	aMG	1.54259e-12	4.44326	7.17768e-09	GObp	GO_REGULATION_OF_ORGAN_MORPHOGENESIS	548	30	GNG5,PSMB1,RBPJ,PFN1,DAB2,TNF,CSF1,PSMD4,PSMD8,PSME1,PSME2,PSMA2,PSMA7,UBA52,TNFAIP3,PSMD11,PSMB6,PSMA1,PSMD14,PSMC3,PSMC1,PSMB4,PSMC5,PHB2,PSMD7,PSMC4,AP2S1,UBC,PSMC2,PSMD2
Cortex	24hrs	aMG	2.22195e-12	4.51925	7.57462e-09	ChemicalGeneticPerturbations	BENPORATH_MYC_TARGETS_WITH_EBOX	548	29	JUN,CSTB,ACTG1,HSP90AB1,JUNB,PSMB1,HNRNPA2B1,HBA2,HMGN2,EIF4A1,TCF12,BSG,NCL,H2AFZ,RGS2,ARSB,NME1,UBA52,RBM3,ICAM1,ENO1,SMAD7,TXN,ITGB1,ARF1,ACTB,GAPDH,CD63,AKR1A1
Cortex	24hrs	aMG	2.26385e-12	2.16247	7.71748e-09	ChemicalGeneticPerturbations	PUJANA_ATM_PCC_NETWORK	548	87	HSPA4,LY86,EEF1A1,RREB1,ERH,YWHAB,ACTR2,SIRPB1,HK2,LARP7,HNRNPA2B1,HMGN1,FUBP1,HNRNPA3,HNRNPAB,HMGN2,HMGN4,ADAM10,ARPC2,TNF,RAC2,NHP2,SRSF2,SERBP1,CCT8,NOP14,CASK,TBC1D5,COX7B,MRPL33,C1QBP,CSF2RB,SMARCA5,CD52,PSME1,NCL,H2AFZ,PLCL2,HDAC1,NOP56,RHOH,NCF4,SSB,PSME2,H2AFY,EIF5B,LDHA,TCEA1,PDAP1,RBM3,DOCK10,FCHSD2,RSL1D1,TGFBR1,ANP32B,NOLC1,FLI1,EIF3E,RANBP1,CUX1,LCP1,PCNA,HSPA9,TKT,ARPC3,PTPN1,ANP32E…
Cortex	24hrs	aMG	2.59282e-12	7.41565	8.83893e-09	ChemicalGeneticPerturbations	MOOTHA_VOXPHOS	548	18	NDUFC1,COX7A2,UQCR10,COX7B,COX6B1,COX5B,NDUFAB1,NDUFA13,COX7C,UQCRQ,COX4I1,NDUFC2,UQCR11,COX6A1,UQCRB,NDUFB8,NDUFA4,NDUFA2
Cortex	24hrs	aMG	1.99018e-12	4.05067	9.26031e-09	GObp	GO_GENERATION_OF_PRECURSOR_METABOLITES_AND_ENERGY	548	33	NDUFC1,HK2,MDH2,CALM1,UQCR10,COX7B,COX6B1,PID1,NDUFV3,PPP1CA,NDUFB10,LDHA,COX5B,UBA52,ALDOA,ENO1,NDUFAB1,NDUFA13,COX7C,UQCRQ,COX4I1,NDUFC2-KCTD14,NDUFC2,TPI1,UQCR11,SLC25A4,COX6A1,UQCRB,NDUFB8,NDUFA4,GAPDH,UBC,NDUFA2
Cortex	24hrs	aMG	2.92624e-12	2.46301	9.97556e-09	ChemicalGeneticPerturbations	GRYDER_PAX3FOXO1_ENHANCERS_IN_TADS	548	67	CD81,HSPA4,ERH,ACTG1,FUBP1,RBPJ,CDK6,HNRNPA3,HNRNPAB,HMGN2,ADAM10,SLC24A3,ARPC2,NFIA,NHP2,MDH2,TCF12,NOP10,CASK,UQCR10,REXO2,PARK7,INPP4B,PSMD8,ANK2,ADAMTS1,SSB,H2AFY,OAZ1,PID1,CCT5,TNFAIP3,MIF,DOCK10,ELMO1,RSL1D1,NDUFAB1,NOLC1,NAV2,PSMB6,ARL8B,SNX29,WWOX,CUX1,RERE,ATF3,ITGB1,COX4I1,SNRPD3,PSMB4,TEX261,RRM2B,DUSP1,ACTB,TNPO1,GLUL,IL4R,EIF3A,DHX9,DUSP6,TMCC3,IER5,RIMKLB,TXNRD1,GALNT2,EID1,M6PR
Cortex	24hrs	aMG	2.28284e-12	1.958	1.06221e-08	GObp	GO_PHOSPHATE_CONTAINING_COMPOUND_METABOLIC_PROCESS	548	108	SERINC3,LPL,ULK2,NDUFC1,ERH,YWHAB,MEF2C,HK2,PRKCA,HINT1,PSMB1,CSNK1A1,CDK6,ADAM10,TNF,SKP1,MDH2,CALM1,CASK,UQCR10,DAPP1,COX7B,NPTN,REXO2,PSMD4,INPP4B,CSF2RB,MERTK,HADHA,PSMD8,PSME1,COX6B1,MAPK14,PSME2,PSMA2,PSMA7,NDUFV3,PPP1CA,NDUFB10,LDHA,NME1,COX5B,UBA52,ALDOA,IRAK2,PTPRO,TGFBR1,ENO1,IL1B,PSMD11,TALDO1,NDUFAB1,CCL2,SMAD7,PSMB6,NDUFA13,FHIT,MEF2A,CUX1,MAP3K5,CDK11B,COX7C,PSMA1,UQCRQ,TKT,PSMD14,P…
Cortex	24hrs	aMG	2.60777e-12	2.77261	1.2134e-08	GObp	GO_REGULATION_OF_PROTEOLYSIS	548	55	ARL6IP1,CSTB,ARIH1,PDCD5,HSP90AB1,PSMB1,CSNK1A1,UBXN1,SPINT1,DAB2,TNF,SKP1,C1QBP,PARK7,PSMD4,PSMD8,PSME1,PYCARD,CTSC,ZNF207,PSME2,PSMA2,BST2,PSMA7,UBA52,GBA,IL1B,PSMD11,ANP32B,SMAD7,PSMB6,NDUFA13,FHIT,MAP3K5,PSMA1,PSMD14,SART3,RNF19B,PSMC3,PSMC1,PSMB4,GAS6,DUSP1,PSMC5,HSPE1,PHB2,PSMD7,PAK2,BIRC3,C5AR1,PSMC4,GPX1,UBC,PSMC2,PSMD2
Cortex	24hrs	aMG	3.62716e-12	2.47188	1.2365e-08	ChemicalGeneticPerturbations	LOPEZ_MBD_TARGETS	548	66	NDUFC1,PDCD5,EIF3CL,MFAP1,C1QC,JUNB,FUBP1,HMGN2,HMGN4,PFN1,CFL1,MT2A,EIF4A1,ROMO1,PSMD8,ARHGDIA,EIF3J,CSF3R,SDC4,CTSC,PSME2,PSMA2,RHOB,CCT5,PPP1CA,LDHA,PA2G4,UBA52,TCEA1,STIP1,ALDOA,EIF2S2,GUSB,ENO1,NDUFAB1,FLI1,EIF3E,CCT3,PCNA,PSMA1,FOXN3,ARPC3,SELPLG,CDKN1A,SNX1,CDC37,PSMC3,RHEB,PSMB4,EIF2S1,BTF3,UQCR11,CNBP,HCLS1,DDX21,LGMN,TOMM7,SET,BIRC3,CD63,CDK11A,PSMC4,PRDX1,PSMC2,TXNRD1,NAP1L1
Cortex	24hrs	aMG	4.1281e-12	3.07602	1.40727e-08	ChemicalGeneticPerturbations	BERENJENO_TRANSFORMED_BY_RHOA_UP	548	46	JUN,HSPA4,HK2,TAF1D,NHP2,EIF3J,H2AFZ,NMT1,BANF1,H2AFY,SNRPD1,PSMA7,LDHA,NME1,PA2G4,TNFAIP3,STIP1,TMEM176B,FKBP2,RSL1D1,ATP1B3,PSMD11,TALDO1,CCL2,RANBP1,CHD1,CCT3,PCNA,PSMA1,TXN,NOP58,CDKN1A,SNRPD3,TPI1,ITGA6,EIF2S1,DUSP1,DDX21,DUSP6,CCT6A,BOLA2,GAPDH,FTSJ3,CACYBP,PSMC2,TXNRD1
Cortex	24hrs	aMG	2.10315e-11	4.14114	1.41752e-08	Reactome	REACTOME_CLASS_I_MHC_MEDIATED_ANTIGEN_PROCESSING_PRESENTATION	548	29	FCGR1B,PDIA3,PSMB1,SKP1,CALR,PSMD4,PSMD8,PSME1,NCF4,PSME2,PSMA2,PSMA7,UBA52,PSMD11,PSMB6,FCGR1A,PSMA1,HSPA5,PSMD14,CANX,PSMC3,PSMC1,PSMB4,PSMC5,PSMD7,PSMC4,SEC61G,PSMC2,PSMD2
Cortex	24hrs	aMG	2.41738e-11	6.58328	1.62932e-08	Reactome	REACTOME_RESPIRATORY_ELECTRON_TRANSPORT_ATP_SYNTHESIS_BY_CHEMIOSMOTIC_COUPLING_AND_HEAT_PRODUCTION_BY_UNCOUPLING_PROTEINS_	548	18	NDUFC1,COX7B,COX6B1,NDUFV3,NDUFB10,COX5B,NDUFAB1,NDUFA13,COX7C,UQCRQ,COX4I1,NDUFC2,UQCR11,COX6A1,UQCRB,NDUFB8,NDUFA4,NDUFA2
Cortex	24hrs	aMG	5.16084e-12	5.45942	1.75933e-08	ChemicalGeneticPerturbations	IGLESIAS_E2F_TARGETS_UP	548	23	CTSZ,LPL,ACTG1,C1QC,HNRNPA2B1,HBA2,C1QB,DAB2,SKP1,C1QA,NPTN,BZW1,TUBB,RHOB,MORF4L1,LCP1,PCNA,ITGB1,DNAJA1,GAS6,SLC25A4,TUBA1B,CACYBP
Cortex	24hrs	aMG	7.25248e-12	4.95059	2.47237e-08	ChemicalGeneticPerturbations	YAO_TEMPORAL_RESPONSE_TO_PROGESTERONE_CLUSTER_17	548	25	MDH2,CALM1,ROMO1,PSMD8,HSD17B12,TUBB,PSMA7,TCEA1,PDAP1,COPE,BAG1,TALDO1,NDUFAB1,PSMB6,ERP29,UQCRQ,PSMD14,KRTCAP2,TPM4,TMED10,ACTB,PHB2,SET,TXNRD1,NAP1L1
Cortex	24hrs	aMG	5.98519e-12	2.10143	2.78491e-08	GObp	GO_POSITIVE_REGULATION_OF_CATALYTIC_ACTIVITY	548	89	CD81,JUN,CTSA,DENND4A,PDCD5,HSP90AB1,YWHAB,MEF2C,PRKCA,PSMB1,PFN1,TBC1D9,TNF,CSF1,SKP1,GTF2F1,CALM1,TBC1D5,DOCK8,PARK7,SH3BGRL3,PSMD4,CSF2RB,PSMD8,ARHGDIA,PSME1,CCL4,CCL4L2,SDC4,RGS2,PYCARD,NCF4,MAPK14,PSME2,PSMA2,PSMA7,PSENEN,DOCK11,UBA52,MIF,TCEA1,DOCK10,ICAM1,ELMO1,IRAK2,DOCK4,TGFBR1,ATP1B3,IL1B,PSMD11,ANP32B,CCL2,PSMB6,HNRNPU,RANBP1,NDUFA13,ERP29,PCNA,MAP3K5,PSMA1,SRGAP2,RALB,TXN,ITGB1,HSPA5,…
Cortex	24hrs	aMG	1.686e-10	5.30997	3.13595e-08	Kegg	KEGG_OXIDATIVE_PHOSPHORYLATION	548	20	NDUFC1,COX7A2,UQCR10,COX7B,COX6B1,NDUFV3,NDUFB10,COX5B,ATP6AP1,NDUFAB1,COX7C,UQCRQ,COX4I1,NDUFC2,UQCR11,COX6A1,UQCRB,NDUFB8,NDUFA4,NDUFA2
Cortex	24hrs	aMG	9.42891e-12	9.46778	3.21432e-08	ChemicalGeneticPerturbations	MENSSEN_MYC_TARGETS	548	14	HSP90AB1,C1QBP,NCL,NOP56,LDHA,NME1,ENO1,CCT3,HSPA9,TSPO,EIF5AL1,HSPE1,DDX21,EPRS
Cortex	24hrs	aMG	7.06767e-12	3.61435	3.28859e-08	GObp	GO_REGULATION_OF_INNATE_IMMUNE_RESPONSE	548	36	HSP90AB1,PSMB1,SKP1,ITGAM,C1QBP,PSMD4,PSMD8,PSME1,PYCARD,PSME2,PSMA2,CTSB,PSMA7,UBA52,TNFAIP3,IRAK2,PSMD11,PSMB6,PSMA1,PSMD14,PTPN1,CDC37,PSMC3,PSMC1,PSMB4,PSMC5,HSP90B1,CD14,LGMN,PSMD7,PAK2,BIRC3,PSMC4,UBC,PSMC2,PSMD2
Cortex	24hrs	aMG	1.01804e-11	6.12689	3.4705e-08	ChemicalGeneticPerturbations	OUELLET_OVARIAN_CANCER_INVASIVE_VS_LMP_UP	548	20	CSTB,SSR1,HMGN1,COX7B,H2AFZ,TUBB,PSMA2,LDHA,TCEA1,ATP1B3,HNRNPU,RANBP1,SNRPD3,TPM4,RHEB,TMED10,PSMB4,COX6A1,EPRS,SLC25A5
Cortex	24hrs	aMG	1.11008e-11	10.3544	3.78427e-08	ChemicalGeneticPerturbations	SHIPP_DLBCL_VS_FOLLICULAR_LYMPHOMA_UP	548	13	HSP90AB1,P4HB,PSME2,CCT5,LDHA,NME1,MIF,ALDOA,ENO1,CCT3,PSMC1,BCL2A1,PRDX1
Cortex	24hrs	aMG	1.11688e-11	5.5142	3.80745e-08	ChemicalGeneticPerturbations	YAO_TEMPORAL_RESPONSE_TO_PROGESTERONE_CLUSTER_14	548	22	SSR1,PDIA3,LMAN2,NHP2,CCT8,ARHGDIA,BANF1,SSR2,NME1,SSR3,TCEA1,TMEM167A,RANBP1,CCT3,SNRPD3,PDIA4,EIF4G1,NARS,SLC25A5,CCT6A,MRPS28,GAPDH
Cortex	24hrs	aMG	5.8136e-11	5.33821	3.91837e-08	Reactome	REACTOME_TCA_CYCLE_AND_RESPIRATORY_ELECTRON_TRANSPORT	548	21	NDUFC1,MDH2,COX7B,BSG,COX6B1,NDUFV3,NDUFB10,LDHA,COX5B,NDUFAB1,NDUFA13,COX7C,UQCRQ,COX4I1,NDUFC2,UQCR11,COX6A1,UQCRB,NDUFB8,NDUFA4,NDUFA2
Cortex	24hrs	aMG	1.24179e-11	5.0305	4.23326e-08	ChemicalGeneticPerturbations	GOLDRATH_HOMEOSTATIC_PROLIFERATION	548	24	NDUFC1,PRKCA,FUBP1,C1QB,TAF1D,NHP2,PARK7,EIF3J,DYNLL2,H2AFY,NME1,PDAP1,NDUFAB1,UBL5,CANX,CCT2,PSMC5,GLUL,SET,DHX9,CACYBP,GPX1,TPD52,EID1
Cortex	24hrs	aMG	1.29885e-11	5.74571	4.42779e-08	ChemicalGeneticPerturbations	ICHIBA_GRAFT_VERSUS_HOST_DISEASE_35D_UP	548	21	MSR1,LPL,SIRPA,C1QC,C1QB,MT2A,C1QA,CD52,CCL4,NCF4,CTSC,RBM3,ATP1B3,CCL2,FCGR1A,BTG2,SELPLG,PTPN1,CD14,LGMN,SLFN12L
Cortex	24hrs	aMG	9.78171e-12	4.40169	4.55143e-08	GObp	GO_NUCLEOSIDE_TRIPHOSPHATE_METABOLIC_PROCESS	548	28	NDUFC1,HK2,UQCR10,COX7B,COX6B1,NDUFV3,NDUFB10,LDHA,NME1,COX5B,ALDOA,ENO1,NDUFAB1,NDUFA13,COX7C,UQCRQ,COX4I1,NDUFC2-KCTD14,NDUFC2,TPI1,RRM2B,UQCR11,COX6A1,UQCRB,NDUFB8,NDUFA4,GAPDH,NDUFA2
Cortex	24hrs	aMG	1.58343e-11	2.96005	5.39791e-08	ChemicalGeneticPerturbations	TIEN_INTESTINE_PROBIOTICS_24HR_UP	548	46	H3F3B,SRRT,NDUFC1,ERH,PDCD5,HNRNPA3,HNRNPAB,DAB2,SRSF2,CALM1,NPTN,C1QBP,FKBP3,SMARCA5,NOP56,LUC7L3,SNRPD1,NEDD8,SUPT16H,NME1,CYB5R3,HPGD,ASAH1,UBL5,NDUFA13,PCNA,SLC1A1,DNAJA1,ANP32E,SNRPD3,PSMC1,MYL6,TNPO1,SLC25A4,RBM8A,GLUL,HSPE1,DHX9,DYNLL1,FRMD4B,MRPS28,DENR,CACYBP,NDUFA2,EID1,PSMD2
Cortex	24hrs	aMG	1.41708e-11	2.85109	6.59366e-08	GObp	GO_NEGATIVE_REGULATION_OF_PROTEIN_MODIFICATION_PROCESS	548	49	JUN,YWHAB,YWHAG,PSMB1,UBXN1,TNF,CALM1,PARK7,PSMD4,PSMD8,PSME1,SNX6,RGS2,PYCARD,PSME2,GTPBP4,PSMA2,H2AFY,PID1,PSMA7,MPHOSPH10,UBA52,TNFAIP3,GBA,IL1B,PSMD11,SMAD7,PSMB6,PSMA1,ATF3,PSMD14,PDE4D,CDKN1A,DNAJA1,PTPN1,TSPO,PSMC3,PSMC1,PSMB4,DUSP1,PSMC5,SET,DUSP6,PSMD7,PAK2,PSMC4,UBC,PSMC2,PSMD2
Cortex	24hrs	aMG	2.68585e-11	12.3208	9.15606e-08	ChemicalGeneticPerturbations	AMIT_SERUM_RESPONSE_40_MCF10A	548	11	JUN,FOS,RGS2,ZFP36,EGR1,FOSB,KLF6,ATF3,DUSP1,GLUL,LGMN
Cortex	24hrs	aMG	3.07489e-11	7.44775	1.04823e-07	ChemicalGeneticPerturbations	ZHONG_SECRETOME_OF_LUNG_CANCER_AND_MACROPHAGE	548	16	CD81,CTSA,HSP90AB1,MDH2,SDC4,CTSB,PSMA7,LDHA,ALDOA,ENO1,TALDO1,PSMB6,TPI1,ACTB,AKR1A1,PRDX1
Cortex	24hrs	aMG	5.63781e-10	6.72043	1.04863e-07	Kegg	KEGG_CARDIAC_MUSCLE_CONTRACTION	548	15	SLC8A1,COX7A2,UQCR10,COX7B,COX6B1,COX5B,ATP1B3,COX7C,UQCRQ,COX4I1,TPM4,UQCR11,COX6A1,UQCRB,CACNB2
Cortex	24hrs	aMG	6.17694e-10	7.89745	1.14891e-07	Kegg	KEGG_PATHOGENIC_ESCHERICHIA_COLI_INFECTION	548	13	ACTG1,PRKCA,ARPC2,NCL,TUBB,ITGB1,ARPC3,ARPC1B,ACTB,HCLS1,CD14,TUBA1B,TUBA1C
Cortex	24hrs	aMG	3.82288e-11	13.7855	1.30322e-07	ChemicalGeneticPerturbations	DEN_INTERACT_WITH_LCA5	548	10	YWHAB,YWHAG,C1QBP,NCL,DYNLL2,HSPA5,HSPA9,SET,DYNLL1,NAP1L1
Cortex	24hrs	aMG	3.83154e-11	7.35227	1.30617e-07	ChemicalGeneticPerturbations	TARTE_PLASMA_CELL_VS_B_LYMPHOCYTE_UP	548	16	SSR1,LMAN2,P4HB,RNASE4,FKBP2,MANF,HSPA5,PDIA6,SELPLG,CANX,TMED10,ITGA6,GAS6,HSP90B1,SRGN,HEXB
Cortex	24hrs	aMG	4.42354e-11	3.39559	1.50798e-07	ChemicalGeneticPerturbations	MULLIGHAN_MLL_SIGNATURE_1_UP	548	36	CTSA,NDUFC1,ACTR2,SIRPB1,SIRPA,LMAN2,ARPC2,RAC2,CALM1,MRPL33,P4HB,PYCARD,OAZ1,SDF4,ENO1,PSMD11,HNRNPU,LAT2,IPCEF1,RCAN1,LCP1,SELPLG,RNF19B,SNX1,ARPC1B,EVI2A,FCGR2C,FCGR2A,HCLS1,NDUFB8,DYNLL1,PRDX1,HEXB,CCND3,SLA,M6PR
Cortex	24hrs	aMG	3.43017e-11	2.06598	1.59606e-07	GObp	GO_POSITIVE_REGULATION_OF_PROTEIN_METABOLIC_PROCESS	548	86	CD81,JUN,ARIH1,PDCD5,HSP90AB1,MEF2C,PRKCA,USP16,PSMB1,CSNK1A1,DAB2,TNF,CSF1,SKP1,CALM1,NPTN,C1QBP,PARK7,PSMD4,PSMD8,PSME1,CCL4,CCL4L2,SDC4,PYCARD,CTSC,MAPK14,PSME2,PSMA2,BANK1,OAZ1,CPEB1,PSMA7,UBA52,TNFAIP3,MIF,RBM3,ICAM1,ATP6AP1,IRAK2,GBA,TGFBR1,IL1B,PSMD11,ANP32B,CCL2,SMAD7,PSMB6,GNL3,NDUFA13,ERP29,MAP3K5,PSMA1,RALB,TXN,ITGB1,HSPA5,PSMD14,CDKN1A,SART3,PTPN1,RNF19B,SNX1,PSMC3,PSMC1,KLF2,PSMB4,GA…
Cortex	24hrs	aMG	3.59601e-11	3.17188	1.67322e-07	GObp	GO_CYTOKINE_MEDIATED_SIGNALING_PATHWAY	548	40	FCGR1B,PSMB1,MT2A,TNF,CSF1,PSMD4,CSF2RB,PSMD8,PSME1,CSF3R,CCL4,CCL4L2,PYCARD,PSME2,PSMA2,BST2,PSMA7,UBA52,EGR1,ICAM1,IRAK2,IL1B,PSMD11,CCL2,PSMB6,FCGR1A,PSMA1,PSMD14,PSMC3,PSMC1,PSMB4,PSMC5,CCL8,IL4R,PSMD7,BIRC3,PSMC4,UBC,PSMC2,PSMD2
Cortex	24hrs	aMG	5.03999e-11	6.32511	1.71813e-07	ChemicalGeneticPerturbations	CHAUHAN_RESPONSE_TO_METHOXYESTRADIOL_DN	548	18	ARL6IP1,EEF1A1,HSP90AB1,YWHAB,H2AFZ,TUBB,TNFAIP3,COPE,ERP29,BTG2,BTF3,COX6A1,HSP90B1,HCLS1,PHB2,SEC61G,UBC,NAP1L1
Cortex	24hrs	aMG	4.86172e-11	2.94778	2.26216e-07	GObp	GO_NUCLEOBASE_CONTAINING_SMALL_MOLECULE_METABOLIC_PROCESS	548	44	NDUFC1,ERH,HK2,HINT1,MDH2,CASK,UQCR10,COX7B,REXO2,COX6B1,NDUFV3,NDUFB10,LDHA,NME1,COX5B,ALDOA,ENO1,IL1B,TALDO1,NDUFAB1,NDUFA13,FHIT,COX7C,UQCRQ,TXN,TKT,PDE4D,COX4I1,PDE3B,NDUFC2-KCTD14,NDUFC2,PGD,TPI1,RRM2B,UQCR11,COX6A1,UQCRB,NDUFB8,NDUFA4,GAPDH,MACROD2,GPX1,NDUFA2,TXNRD1
Cortex	24hrs	aMG	7.57775e-11	2.54365	2.58326e-07	ChemicalGeneticPerturbations	BENPORATH_MYC_MAX_TARGETS	548	55	LY86,MFAP1,PSMB1,CDK6,UBXN1,PFN1,MT2A,RAC2,SRSF2,CCT8,TCF12,UQCR10,CALR,CSF2RB,CSDE1,PSMD8,NCL,H2AFZ,CTSC,SSB,H2AFY,OAZ1,LDHA,SUPT16H,NME1,PA2G4,SDF2L1,FKBP2,RPL35,MANF,CNDP2,ASAH1,NR6A1,PCNA,MAP3K5,COX7C,PSMA1,HSPA9,PSMD14,PTPN1,SNRPD3,RHEB,TMED10,EIF2S1,PSMC5,HSP90B1,HSPE1,PHB2,TUBA1B,PSMD7,PSMC4,IER5,CACYBP,NDUFA2,M6PR
Cortex	24hrs	aMG	3.87966e-10	4.30108	2.61489e-07	Reactome	REACTOME_METABOLISM_OF_AMINO_ACIDS_AND_DERIVATIVES	548	24	ACAT1,PSMB1,PSMD4,PSMD8,PSME1,PSME2,PSMA2,OAZ1,PSMA7,GATM,PSMD11,CNDP2,PSMB6,PSMA1,PSMD14,PSMC3,PSMC1,PSMB4,PSMC5,GLUL,PSMD7,PSMC4,PSMC2,PSMD2
Cortex	24hrs	aMG	5.80891e-11	1.94121	2.70288e-07	GObp	GO_POSITIVE_REGULATION_OF_MOLECULAR_FUNCTION	548	97	CD81,JUN,CTSA,DENND4A,PDCD5,HSP90AB1,YWHAB,MEF2C,PRKCA,PSMB1,PFN1,TBC1D9,TNF,CSF1,SKP1,GTF2F1,CALM1,TBC1D5,DOCK8,PARK7,SH3BGRL3,PSMD4,CSF2RB,PSMD8,ARHGDIA,PSME1,ANK2,CCL4,CCL4L2,SDC4,PLCL2,RGS2,PYCARD,NCF4,MAPK14,PSME2,PSMA2,PSMA7,NME1,PSENEN,DOCK11,UBA52,MIF,TCEA1,DOCK10,ICAM1,ELMO1,IRAK2,ARID5B,DOCK4,TGFBR1,ATP1B3,ENO1,IL1B,PSMD11,ANP32B,CCL2,PSMB6,HNRNPU,RANBP1,NDUFA13,ERP29,PCNA,MAP3K5,PSMA1,…
Cortex	24hrs	aMG	8.15781e-11	2.78444	2.781e-07	ChemicalGeneticPerturbations	CAIRO_HEPATOBLASTOMA_CLASSES_UP	548	47	HSP90AB1,HNRNPA3,EIF4A1,TAF1D,NHP2,SRSF2,SERBP1,GTF2F1,C1QBP,BSG,P4HB,NCL,NOP56,SSB,ZNF207,GTPBP4,EIF5B,SNRPD1,CCT5,CCDC47,SUPT16H,NME1,SSR3,CLIC1,MIF,TCEA1,ATP6AP1,EIF2S2,RSL1D1,ENO1,NOLC1,EIF3E,RANBP1,GNL3,CCT3,PDIA6,CANX,TPI1,DDX27,CCT2,PDIA4,CHCHD2,UQCRB,PHB2,EPRS,CCT6A,SEC61G
Cortex	24hrs	aMG	4.50756e-10	3.65995	3.03809e-07	Reactome	REACTOME_METABOLISM_OF_MRNA	548	29	YWHAB,PRKCA,PSMB1,EIF4A1,PSMD4,PSMD8,PSME1,MAPK14,ZFP36,PSME2,PSMA2,PSMA7,UBA52,RPL35,PSMD11,PSMB6,PSMA1,PSMD14,PSMC3,PSMC1,PSMB4,TNPO1,RBM8A,PSMC5,EIF4G1,PSMD7,PSMC4,PSMC2,PSMD2
Cortex	24hrs	aMG	6.67005e-11	3.28259	3.10358e-07	GObp	GO_SIGNAL_TRANSDUCTION_BY_PROTEIN_PHOSPHORYLATION	548	37	YWHAB,MEF2C,PSMB1,TNF,SKP1,CALM1,PSMD4,CSF2RB,PSMD8,PSME1,MAPK14,PSME2,PSMA2,PSMA7,UBA52,IRAK2,TGFBR1,IL1B,PSMD11,CCL2,PSMB6,MEF2A,MAP3K5,PSMA1,PSMD14,PTPN1,PSMC3,PSMC1,PSMB4,PSMC5,DUSP6,PSMD7,PAK2,PSMC4,UBC,PSMC2,PSMD2
Cortex	24hrs	aMG	7.71874e-11	5.26355	3.59153e-07	GObp	GO_CELLULAR_RESPIRATION	548	21	NDUFC1,MDH2,UQCR10,COX7B,COX6B1,NDUFV3,NDUFB10,COX5B,NDUFAB1,NDUFA13,COX7C,UQCRQ,COX4I1,NDUFC2-KCTD14,NDUFC2,UQCR11,COX6A1,UQCRB,NDUFB8,NDUFA4,NDUFA2
Cortex	24hrs	aMG	1.07158e-10	2.87785	3.65301e-07	ChemicalGeneticPerturbations	KIM_ALL_DISORDERS_CALB1_CORR_UP	548	44	SERINC3,TMX4,HSP90AB1,YWHAB,ACTR2,HINT1,HNRNPA3,TBC1D9,SRSF2,SKP1,COX7A2,CALM1,NPTN,C1QBP,PSMD8,H2AFZ,H2AFY,OAZ1,TECR,MIF,STIP1,ALDOA,ELMO1,DOCK4,PSMD11,NDUFAB1,PSMB6,ERP29,TKT,CANX,DNAJA1,ARF1,PSMC1,PSMB4,EIF2S1,CCT2,SLC25A4,HSP90B1,SET,NARS,PSMD7,AP2S1,UBC,EID1
Cortex	24hrs	aMG	8.52486e-11	4.29447	3.96662e-07	GObp	GO_ENERGY_DERIVATION_BY_OXIDATION_OF_ORGANIC_COMPOUNDS	548	26	NDUFC1,MDH2,CALM1,UQCR10,COX7B,COX6B1,PID1,NDUFV3,PPP1CA,NDUFB10,COX5B,UBA52,NDUFAB1,NDUFA13,COX7C,UQCRQ,COX4I1,NDUFC2-KCTD14,NDUFC2,UQCR11,COX6A1,UQCRB,NDUFB8,NDUFA4,UBC,NDUFA2
Cortex	24hrs	aMG	1.03539e-10	2.20903	4.81767e-07	GObp	GO_POSITIVE_REGULATION_OF_CELLULAR_COMPONENT_ORGANIZATION	548	71	JUN,RREB1,PDCD5,YWHAB,ACTR2,YWHAG,LMAN2,PFN1,DAB2,ARPC2,TNF,RAC2,CCT8,TBC1D5,NPTN,C1QBP,PARK7,CALR,MERTK,PSMD8,ARHGDIA,ADAMTS1,DYNLL2,NMT1,SDC4,RGS2,PYCARD,MAPK14,H2AFY,ARSB,CPEB1,CCT5,NME1,ICAM1,TGFBR1,IL1B,CCL2,RANBP1,GNL3,UBL5,CUX1,LCP1,CCT3,RALB,ITGB1,ARPC3,SART3,DHX36,ARF1,PSMC3,ARPC1B,PSMC1,GAS6,CCT2,EIF5A,EIF5AL1,PSMC5,HCLS1,CD14,PHB2,TOMM7,CLASP2,IL4R,SURF4,DYNLL1,CCT6A,CD63,PSMC4,GOLGA4,…
Cortex	24hrs	aMG	1.42439e-10	7.96495	4.85573e-07	ChemicalGeneticPerturbations	PHONG_TNF_TARGETS_UP	548	14	JUN,FOS,JUNB,SDC4,ZFP36,TNFAIP3,EGR1,ICAM1,CD83,KLF6,ATF3,DUSP1,BIRC3,IER5
Cortex	24hrs	aMG	9.92859e-09	3.94265	4.96429e-07	Hallmark	HALLMARK_HYPOXIA	548	22	JUN,FOS,TGM2,HK2,PRKCA,RBPJ,MT2A,SDC4,ZFP36,LDHA,TNFAIP3,MIF,ALDOA,ENO1,KLF6,ATF3,HSPA5,CDKN1A,TPI1,DUSP1,GAPDH,TPD52
Cortex	24hrs	aMG	1.74115e-10	9.55795	5.93559e-07	ChemicalGeneticPerturbations	MCDOWELL_ACUTE_LUNG_INJURY_UP	548	12	CSTB,FOS,ZFP36,RBM3,KLF6,BTG2,CDKN1A,DUSP1,FCGR2A,IL4R,SLFN12,TXNRD1
Cortex	24hrs	aMG	1.03602e-09	3.367	6.98276e-07	Reactome	REACTOME_METABOLISM_OF_RNA	548	31	YWHAB,PRKCA,PSMB1,EIF4A1,PSMD4,PSMD8,PSME1,MAPK14,ZFP36,PSME2,PSMA2,SNRPD1,PSMA7,UBA52,RPL35,PSMD11,PSMB6,PSMA1,PSMD14,SNRPD3,PSMC3,PSMC1,PSMB4,TNPO1,RBM8A,PSMC5,EIF4G1,PSMD7,PSMC4,PSMC2,PSMD2
Cortex	24hrs	aMG	1.50985e-10	2.73472	7.02532e-07	GObp	GO_POSITIVE_REGULATION_OF_TRANSFERASE_ACTIVITY	548	47	CD81,HSP90AB1,PSMB1,TNF,CSF1,SKP1,CALM1,PARK7,PSMD4,PSMD8,PSME1,SDC4,MAPK14,PSME2,PSMA2,PSMA7,UBA52,MIF,IRAK2,TGFBR1,IL1B,PSMD11,PSMB6,ERP29,MAP3K5,PSMA1,RALB,TXN,HSPA5,PSMD14,CDKN1A,PTPN1,PSMC3,PSMC1,PSMB4,GAS6,CCT2,PSMC5,DUSP6,PSMD7,PAK2,C5AR1,PSMC4,UBC,PSMC2,CCND3,PSMD2
Cortex	24hrs	aMG	1.58647e-10	4.04913	7.38182e-07	GObp	GO_NUCLEOSIDE_MONOPHOSPHATE_METABOLIC_PROCESS	548	27	NDUFC1,HK2,CASK,UQCR10,COX7B,COX6B1,NDUFV3,NDUFB10,LDHA,COX5B,ALDOA,ENO1,NDUFAB1,NDUFA13,COX7C,UQCRQ,COX4I1,NDUFC2-KCTD14,NDUFC2,TPI1,UQCR11,COX6A1,UQCRB,NDUFB8,NDUFA4,GAPDH,NDUFA2
Cortex	24hrs	aMG	2.16755e-10	4.12345	7.38919e-07	ChemicalGeneticPerturbations	MARKEY_RB1_ACUTE_LOF_DN	548	26	CTSZ,C1QC,C1QB,MT2A,RAC2,ITGAM,CD52,CCL4,NCF4,PSME2,CTSB,GATM,GBA,LAT2,FCGR1A,STAB1,LCP1,SELPLG,EVI2A,FCGR2B,HCLS1,SRGN,LGMN,SLFN12L,BCL2A1,C5AR1
Cortex	24hrs	aMG	1.56556e-08	5.07502	7.82779e-07	Hallmark	HALLMARK_UNFOLDED_PROTEIN_RESPONSE	548	16	SSR1,EIF4A1,NHP2,NOP14,CALR,NOP56,BANF1,NOLC1,CCL2,ATF3,HSPA5,PDIA6,HSPA9,EIF2S1,HSP90B1,EIF4G1
Cortex	24hrs	aMG	2.48346e-10	3.08146	8.46612e-07	ChemicalGeneticPerturbations	ROME_INSULIN_TARGETS_IN_MUSCLE_UP	548	38	OLFML3,ARIH1,HK2,USP16,YWHAG,NFIA,CCT8,COX7A2,H2AFZ,ZNF207,TUBB,TECR,SUPT16H,COPE,ALDOA,EIF2S2,PSMD11,TALDO1,EIF3E,ARPC3,PSMD14,PDE4D,SART3,CANX,NDUFC2,RHEB,PSMB4,BTF3,RCSD1,CNBP,CHCHD2,LACTB,SET,DYNLL1,CCT6A,PRDX1,PSMC2,EID1
Cortex	24hrs	aMG	2.55516e-10	3.19387	8.71053e-07	ChemicalGeneticPerturbations	OSMAN_BLADDER_CANCER_UP	548	36	SERINC3,ARIH1,PDIA3,CHD9,USP16,CSNK1A1,FAM133B,SERBP1,CALR,BSG,P4HB,DYNLL2,ACBD5,CTSC,H2AFY,TMED5,CTSB,SDF4,LDHA,PSENEN,PDAP1,ENO1,SMAD7,PCNA,NUCKS1,DHX36,TPM4,KLF2,EIF2S1,TNPO1,EIF5A,BBX,HSP90B1,EIF4G1,FRMD4B,CCND3
Cortex	24hrs	aMG	1.89692e-10	1.95075	8.82637e-07	GObp	GO_REGULATION_OF_MULTICELLULAR_ORGANISMAL_DEVELOPMENT	548	91	JUN,FOS,SRRT,RREB1,ULK2,GNG5,MEF2C,C1QC,PRKCA,YWHAG,PSMB1,RBPJ,CDK6,PFN1,CFL1,SPINT1,DAB2,TNF,CSF1,SLC8A1,TCF12,NPTN,C1QBP,CALR,PSMD4,PLXNA4,PSMD8,ARHGDIA,PSME1,CSF3R,ADAMTS1,LUC7L,CTLA4,MAPK14,PSME2,PSMA2,H2AFY,ARSB,RHOB,CPEB1,PSMA7,NME1,UBA52,TNFAIP3,EGR1,TMEM176B,ATP6AP1,PTPRO,TGFBR1,CD83,IL1B,PSMD11,CCL2,SMAD7,PSMB6,STAB1,CUX1,PSMA1,SRGAP2,ITGB1,TRPM4,SEMA5B,PSMD14,TSPO,PDE3B,ARF1,PSMC3,PSMC1…
Cortex	24hrs	aMG	1.7927e-08	4.31015	8.96352e-07	Hallmark	HALLMARK_UV_RESPONSE_UP	548	19	FOS,JUNB,BSG,RHOB,STIP1,PDAP1,ICAM1,ALDOA,FOSB,HNRNPU,BTG2,ATF3,DNAJA1,PSMC3,SLC25A4,DDX21,AP2S1,PLCL1,CCND3
Cortex	24hrs	aMG	2.87494e-10	4.52952	9.80066e-07	ChemicalGeneticPerturbations	FERNANDEZ_BOUND_BY_MYC	548	23	JUN,CSTB,ACTG1,JUNB,PSMB1,HNRNPA2B1,HMGN2,EIF4A1,TCF12,BSG,NME1,UBA52,RBM3,ICAM1,TGFBR1,ENO1,TXN,ITGB1,ARF1,ITGA6,HSPE1,CD63,AKR1A1
Cortex	24hrs	aMG	2.89287e-10	6.51678	9.86178e-07	ChemicalGeneticPerturbations	NEMETH_INFLAMMATORY_RESPONSE_LPS_UP	548	16	MSR1,MT2A,DAB2,TNF,ICAM1,JUND,ATF3,CDKN1A,FCGR2B,HCLS1,SRGN,SLFN12,SLFN12L,BCL2A1,C5AR1,TXNRD1
Cortex	24hrs	aMG	2.12471e-10	3.58423	9.88628e-07	GObp	GO_REGULATION_OF_WNT_SIGNALING_PATHWAY	548	31	PSMB1,CSNK1A1,RBPJ,DAB2,PSMD4,PSMD8,PSME1,HDAC1,MAPK14,PSME2,PSMA2,PSMA7,PPP1CA,UBA52,EGR1,PTPRO,PSMD11,PSMB6,WWOX,PSMA1,TRPM4,PSMD14,PSMC3,PSMC1,PSMB4,PSMC5,PSMD7,PSMC4,UBC,PSMC2,PSMD2
Cortex	24hrs	aMG	2.13375e-10	1.98364	9.92835e-07	GObp	GO_INTRACELLULAR_SIGNAL_TRANSDUCTION	548	87	JUN,RREB1,YWHAB,SIRPG,MEF2C,PRKCA,HINT1,PSMB1,ADAM15,CFL1,TNF,RAC2,SKP1,SLC8A1,CALM1,MCTP1,DOCK8,C1QBP,PARK7,PSMD4,CSF2RB,MERTK,PSMD8,PSME1,ANK2,PLCL2,PYCARD,RHOH,MAPK14,PSME2,ARL15,PSMA2,RHOB,PSMA7,DOCK11,UBA52,TNFAIP3,MIF,DOCK10,ELMO1,IRAK2,DOCK4,TGFBR1,IL1B,PSMD11,CCL2,SMAD7,PSMB6,LAT2,ARL8B,FHIT,WWOX,RCAN1,MEF2A,LCP1,PCNA,MAP3K5,BTG2,PSMA1,RALB,PSMD14,PDE4D,CDKN1A,NISCH,PTPN1,ARF1,PSMC3,PSMC1…
Cortex	24hrs	aMG	3.08881e-10	6.98227	1.05297e-06	ChemicalGeneticPerturbations	HESS_TARGETS_OF_HOXA9_AND_MEIS1_DN	548	15	MSR1,FOS,LPL,SIRPA,DAB2,MERTK,ZFP36,EGR1,IL1B,FCGR1A,BTG2,DUSP1,SLFN12L,C5AR1,TPD52
Cortex	24hrs	aMG	3.24118e-10	4.18718	1.10492e-06	ChemicalGeneticPerturbations	TIEN_INTESTINE_PROBIOTICS_24HR_DN	548	25	EEF1A1,ARIH1,ACTG1,PDIA3,CSNK1A1,CALR,P4HB,TMED5,TCEA1,SDF2L1,MANF,FTL,ATF3,EEF1G,HSPA5,PDIA6,HSPA9,CANX,RNF19B,LPIN2,EIF5A,PDIA4,HSP90B1,UBC,TXNRD1
Cortex	24hrs	aMG	4.23791e-10	5.32034	1.4447e-06	ChemicalGeneticPerturbations	ALTEMEIER_RESPONSE_TO_LPS_WITH_MECHANICAL_VENTILATION	548	19	MS4A6A,JUNB,MT2A,ITGAM,CSF2RB,CSF3R,CCL4,TNFAIP3,IL1B,CCL2,FCGR1A,RCAN1,ATF3,FCGR2A,CD14,SLFN12L,BCL2A1,C5AR1,SLA
Cortex	24hrs	aMG	2.21514e-09	2.76774	1.493e-06	Reactome	REACTOME_METABOLISM_OF_PROTEINS	548	40	SSR1,EEF1A1,PDIA3,EIF3D,EIF4A1,DAD1,CCT8,SSR4,CALR,EIF3J,SPCS2,EIF3C,NOP56,SSR2,ARSB,EIF5B,CCT5,SSR3,UBA52,EIF2S2,RPL35,EIF3E,CCT3,EEF1G,HSPA9,CANX,EIF2S1,ACTB,CCT2,EIF5A,SLC25A4,EIF4G1,TOMM7,TUBA1B,TUBA1C,EIF3A,CCT6A,SEC61G,GALNT2,MLEC
Cortex	24hrs	aMG	3.79616e-10	2.05566	1.76636e-06	GObp	GO_NEGATIVE_REGULATION_OF_RESPONSE_TO_STIMULUS	548	78	YWHAB,PSMB1,CSNK1A1,CDK6,UBXN1,TNFAIP8L2,DAB2,TNF,CALM1,CASK,C1QBP,PARK7,CALR,PSMD4,PSMD8,PSME1,SNX6,PLCL2,RGS2,HDAC1,PYCARD,RHOH,MAPK14,PSME2,PSMA2,BST2,BANK1,PID1,PSMA7,UBA52,TNFAIP3,MIF,EGR1,ICAM1,PTPRO,GBA,TGFBR1,IL1B,PSMD11,CCL2,SMAD7,PSMB6,NDUFA13,WWOX,PSMA1,ATF3,TXN,ITGB1,HSPA5,SEMA5B,PSMD14,DNAJA1,PTPN1,TSPO,PDE3B,PSMC3,PSMC1,PSMB4,ITGA6,GAS6,RRM2B,DUSP1,INPP5D,PSMC5,CD14,PHB2,LGMN,CLASP2…
Cortex	24hrs	aMG	9.94711e-09	6.47153	1.85016e-06	Kegg	KEGG_LEISHMANIA_INFECTION	548	13	JUN,FOS,TNF,ITGAM,NCF4,MAPK14,IL1B,FCGR1A,ITGB1,FCGR2C,FCGR2A,FCGR3A,FCGR3B
Cortex	24hrs	aMG	4.72148e-10	2.00209	2.1969e-06	GObp	GO_REGULATION_OF_RESPONSE_TO_STRESS	548	82	SERINC3,LPL,RREB1,HSP90AB1,MEF2C,PRKCA,PSMB1,CDK6,UBXN1,TNFAIP8L2,TNF,SKP1,ITGAM,CASK,C1QBP,PARK7,PSMD4,P4HB,PSMD8,PSME1,SNX6,CCL4,CCL4L2,PYCARD,MAPK14,PSME2,PSMA2,CTSB,SNRPD1,PSMA7,UBA52,TNFAIP3,MIF,SDF2L1,ELMO1,IRAK2,GBA,RSL1D1,BAG1,IL1B,PSMD11,CCL2,PSMB6,MBD5,ERP29,PCNA,MAP3K5,PSMA1,RALB,TXN,HSPA5,PSMD14,DNAJA1,PTPN1,TSPO,ARF1,CDC37,PSMC3,PSMC1,PSMB4,EIF2S1,PSMC5,HSP90B1,CHCHD2,CD14,PHB2,LGMN,…
Cortex	24hrs	aMG	4.78743e-10	3.18396	2.22759e-06	GObp	GO_PURINE_CONTAINING_COMPOUND_METABOLIC_PROCESS	548	35	NDUFC1,HK2,HINT1,CASK,UQCR10,COX7B,COX6B1,NDUFV3,NDUFB10,LDHA,NME1,COX5B,ALDOA,ENO1,IL1B,NDUFAB1,NDUFA13,FHIT,COX7C,UQCRQ,PDE4D,COX4I1,PDE3B,NDUFC2-KCTD14,NDUFC2,TPI1,UQCR11,COX6A1,UQCRB,NDUFB8,NDUFA4,GAPDH,MACROD2,GPX1,NDUFA2
Cortex	24hrs	aMG	5.16618e-10	3.46141	2.40382e-06	GObp	GO_REGULATION_OF_CELL_CYCLE_PHASE_TRANSITION	548	31	PSMB1,SKP1,PSMD4,PSMD8,PSME1,ZNF207,PSME2,PSMA2,H2AFY,PID1,PSMA7,UBA52,PSMD11,PSMB6,PCNA,BTG2,PSMA1,FOXN3,PSMD14,CDKN1A,PSMC3,PSMC1,PSMB4,DUSP1,PSMC5,PHB2,PSMD7,PSMC4,UBC,PSMC2,PSMD2
Cortex	24hrs	aMG	6.08691e-10	1.9074	2.83224e-06	GObp	GO_REGULATION_OF_PROTEIN_MODIFICATION_PROCESS	548	91	CD81,JUN,HSP90AB1,YWHAB,MEF2C,PRKCA,YWHAG,PSMB1,UBXN1,DAB2,TNF,RAC2,CSF1,SKP1,CALM1,NPTN,PARK7,PSMD4,PSMD8,PSME1,SNX6,CCL4,CCL4L2,SDC4,PLCL2,RGS2,PYCARD,MAPK14,PSME2,GTPBP4,PSMA2,H2AFY,BANK1,PID1,PSMA7,MPHOSPH10,UBA52,TNFAIP3,MIF,EGR1,ICAM1,ATP6AP1,IRAK2,GBA,TGFBR1,IL1B,PSMD11,CCL2,SMAD7,PSMB6,GNL3,ERP29,MAP3K5,PSMA1,RALB,ATF3,TXN,ITGB1,HSPA5,PSMD14,PDE4D,CDKN1A,SART3,DNAJA1,PTPN1,TSPO,CDC37,PSMC…
Cortex	24hrs	aMG	6.47208e-10	5.1985	3.01146e-06	GObp	GO_PROTEIN_STABILIZATION	548	19	HSP90AB1,PFN1,CCT8,PARK7,CALR,ANK2,ZNF207,GTPBP4,CCT5,ATP1B3,SMAD7,CDC37L1,CCT3,CDKN1A,CDC37,CCT2,PHB2,CCT6A,GAPDH
Cortex	24hrs	aMG	6.51161e-10	3.70326	3.02985e-06	GObp	GO_PROTEASOMAL_PROTEIN_CATABOLIC_PROCESS	548	28	PSMB1,CSNK1A1,UBXN1,SKP1,PSMD4,PSMD8,PSME1,PSME2,PSMA2,PSMA7,CCDC47,UBA52,SDF2L1,PSMD11,PSMB6,PSMA1,HSPA5,PSMD14,PSMC3,PSMC1,PSMB4,PSMC5,HSP90B1,PSMD7,PSMC4,UBC,PSMC2,PSMD2
Cortex	24hrs	aMG	4.51364e-09	4.10693	3.04219e-06	Reactome	REACTOME_DNA_REPLICATION	548	22	PSMB1,PSMD4,PSMD8,PSME1,PSME2,PSMA2,PSMA7,UBA52,PSMD11,PSMB6,PCNA,PSMA1,PSMD14,CDKN1A,PSMC3,PSMC1,PSMB4,PSMC5,PSMD7,PSMC4,PSMC2,PSMD2
Cortex	24hrs	aMG	7.07551e-10	1.96524	3.29223e-06	GObp	GO_POSITIVE_REGULATION_OF_CELL_COMMUNICATION	548	84	CD81,JUN,SERINC3,LY86,ERH,PDCD5,PDIA3,YWHAB,PRKCA,YWHAG,HINT1,PSMB1,RBPJ,DAB2,TNF,CSF1,CALM1,NPTN,C1QBP,PARK7,PSMD4,PSMD8,PSME1,DYNLL2,CCL4,CCL4L2,NMT1,PYCARD,CTSC,MAPK14,PSME2,PSMA2,BST2,BANK1,PSMA7,PPP1CA,UBA52,MIF,ICAM1,ATP6AP1,IRAK2,GBA,TGFBR1,IL1B,PSMD11,CCL2,PSMB6,MBD5,WWOX,ERP29,MAP3K5,PSMA1,RALB,ATF3,NUCKS1,TXN,ITGB1,TRPM4,PSMD14,PTPN1,PSMC3,PSMC1,RHEB,PSMB4,GAS6,PSMC5,GLUL,HCLS1,CMTM3,PH…
Cortex	24hrs	aMG	8.21962e-10	2.66596	3.82459e-06	GObp	GO_POSITIVE_REGULATION_OF_CELL_DEATH	548	45	JUN,SERINC3,TGM2,PDCD5,PDIA3,YWHAB,MEF2C,YWHAG,HBA2,HBA1,TNF,C1QBP,PARK7,DYNLL2,NMT1,PYCARD,CTLA4,CTSC,RHOB,PPP1CA,LDHA,PSENEN,UBA52,TGFBR1,IL1B,ANP32B,NDUFA13,WWOX,MAP3K5,ATF3,ITGB1,CDKN1A,DNAJA1,TSPO,ITGA6,EIF2S1,DUSP1,INPP5D,HSPE1,DUSP6,TXNIP,PAK2,DYNLL1,BCL2A1,UBC
Cortex	24hrs	aMG	1.15587e-09	10.5419	3.94035e-06	ChemicalGeneticPerturbations	HONMA_DOCETAXEL_RESISTANCE	548	10	PDCD5,CFL1,CALR,TUBB,ENO1,COX7C,HSPA5,TUBA1B,DYNLL1,GAPDH
Cortex	24hrs	aMG	1.1994e-09	4.22755	4.08877e-06	ChemicalGeneticPerturbations	KYNG_DNA_DAMAGE_DN	548	23	PDCD5,HNRNPA2B1,CSNK1A1,CSF2RB,CSDE1,ADAMTS1,NMT1,OAZ1,RHOB,SSR3,EGR1,TAF1C,MORF4L1,CDC37L1,PCNA,ITGB1,ARPC3,DNAJA1,ARF1,ARPC1B,GOLGA4,HEXB,GALNT2
Cortex	24hrs	aMG	1.23048e-09	2.48215	4.19471e-06	ChemicalGeneticPerturbations	RODRIGUES_THYROID_CARCINOMA_ANAPLASTIC_UP	548	50	HSPA4,CTSA,TGM2,ACTR2,HK2,USP16,CSNK1A1,CDK6,ADAM10,EIF4A1,CREB5,LCORL,REXO2,BZW1,NOP56,SSB,MAPK14,GTPBP4,EIF5B,SUPT16H,MPHOSPH10,SSR3,STIP1,TMEM167A,IRAK2,EIF2S2,TGFBR1,ENO1,EIF4G2,SRGAP2,ITGB1,HSPA9,PSMD14,DHX36,TPM4,DDX27,EIF2S1,CCT2,EIF5A,SRGN,EIF4G1,LACTB,VMP1,EPRS,DHX9,PAK2,BIRC3,CCT6A,DENR,TXNRD1
Cortex	24hrs	aMG	1.3115e-09	6.87386	4.47091e-06	ChemicalGeneticPerturbations	ADDYA_ERYTHROID_DIFFERENTIATION_BY_HEMIN	548	14	JUN,MEF2C,HBA1,ADAM10,MT2A,EGR1,KLF6,ATF3,HSPA5,FCGR2A,DHX9,TXNIP,IER5,TXNRD1
Cortex	24hrs	aMG	9.7276e-10	2.2733	4.52625e-06	GObp	GO_REGULATION_OF_TRANSFERASE_ACTIVITY	548	60	CD81,HSP90AB1,YWHAG,PSMB1,TNF,RAC2,CSF1,SKP1,CALM1,PARK7,PSMD4,PSMD8,PSME1,SNX6,SDC4,RGS2,PYCARD,MAPK14,PSME2,GTPBP4,PSMA2,H2AFY,PSMA7,UBA52,TNFAIP3,MIF,IRAK2,GBA,TGFBR1,IL1B,PSMD11,SMAD7,PSMB6,ERP29,MAP3K5,PSMA1,RALB,TXN,HSPA5,PSMD14,CDKN1A,DNAJA1,PTPN1,CDC37,PSMC3,PSMC1,PSMB4,GAS6,DUSP1,CCT2,PSMC5,DUSP6,PSMD7,PAK2,C5AR1,PSMC4,UBC,PSMC2,CCND3,PSMD2
Cortex	24hrs	aMG	1.33675e-09	4.05762	4.55697e-06	ChemicalGeneticPerturbations	CHANG_CORE_SERUM_RESPONSE_UP	548	24	JUNB,HNRNPA2B1,HMGN2,PFN1,UQCR10,ADAMTS1,H2AFZ,SNRPD1,PSMA7,CCT5,NME1,PA2G4,PDAP1,ENO1,PSMD14,PSMC3,MYL6,TPI1,ITGA6,PDIA4,EIF4G1,SLC25A5,MRPS28,PSMD2
Cortex	24hrs	aMG	1.41471e-09	21.5054	4.82273e-06	ChemicalGeneticPerturbations	CHASSOT_SKIN_WOUND	548	6	JUN,FOS,JUNB,EGR1,FOSB,KLF2
Cortex	24hrs	aMG	1.5226e-09	2.7222	5.19054e-06	ChemicalGeneticPerturbations	FEVR_CTNNB1_TARGETS_DN	548	42	ERH,HMGN1,HBA2,HNRNPAB,HMGN2,EIF4A1,SRSF2,TCF12,FKBP3,SMARCA5,NCL,H2AFZ,SDC4,LUC7L,NOP56,SSB,ZNF207,TUBB,GTPBP4,H2AFY,SNRPD1,CCT5,SPPL2A,PA2G4,EIF2S2,TGFBR1,NOLC1,EIF3E,CCT3,PCNA,PSMA1,NOP58,DHX36,EIF2S1,BTF3,CCT2,DDX21,SET,EIF3A,SLC25A5,ZFHX3,NAP1L1
Cortex	24hrs	aMG	1.95539e-09	7.28047	6.66593e-06	ChemicalGeneticPerturbations	HAHTOLA_MYCOSIS_FUNGOIDES_CD4_UP	548	13	ACTR2,MCTP1,CCL4,MAPK14,BST2,RHOB,EGR1,IL1B,KLF6,BTG2,ATF3,CDKN1A,GLUL
Cortex	24hrs	aMG	1.95539e-09	7.28047	6.66593e-06	ChemicalGeneticPerturbations	PELLICCIOTTA_HDAC_IN_ANTIGEN_PRESENTATION_UP	548	13	PDIA3,PSMB1,CALR,PSMD4,COPE,HSPA5,TMED10,PSMB4,COPB1,PDIA4,HSP90B1,PSMC4,PSMD2
Cortex	24hrs	aMG	1.98009e-09	2.66186	6.75013e-06	ChemicalGeneticPerturbations	FULCHER_INFLAMMATORY_RESPONSE_LECTIN_VS_LPS_UP	548	43	JUN,FCGR1B,LPL,TGM2,PRKCA,HINT1,UBXN1,SPINT1,TNFAIP8L2,DAD1,RAC2,NHP2,CSF1,CALM1,SH3BGRL3,RHOH,SSR2,NDUFV3,TMED3,NME1,PTPRO,TGFBR1,IL1B,SMAD7,RANBP1,MRPL52,LAT2,RCAN1,MAP3K5,BTG2,FOXN3,NISCH,NAAA,TEX261,EVI2A,FCGR2C,FCGR2A,FCGR2B,CMTM3,DUSP6,BIRC3,NDUFA2,TXNRD1
Cortex	24hrs	aMG	3.2733e-08	12.5448	7.10306e-06	Biocarta	BIOCARTA_CCR5_PATHWAY	548	7	JUN,FOS,PRKCA,CALM1,CCL4,MAPK14,CCL2
Cortex	24hrs	aMG	1.55117e-09	3.23998	7.2176e-06	GObp	GO_REGULATION_OF_CELLULAR_AMIDE_METABOLIC_PROCESS	548	32	SRRT,EIF3CL,USP16,HNRNPA2B1,EIF3D,EIF4A1,TNF,C1QBP,CALR,EIF3J,RGS2,EIF3C,ZFP36,BANK1,EIF5B,CPEB1,PPP1CA,PA2G4,RBM3,EIF3E,EIF4G2,BTG2,TMED10,EIF2S1,EIF5A,EIF5AL1,RBM8A,EIF4G1,EPRS,EIF3A,PASK,GAPDH
Cortex	24hrs	aMG	1.09011e-08	3.19824	7.34735e-06	Reactome	REACTOME_CELL_CYCLE_MITOTIC	548	29	YWHAG,PSMB1,CDK6,SKP1,PSMD4,PSMD8,PSME1,HDAC1,TUBB,PSME2,PSMA2,PSMA7,UBA52,PSMD11,PSMB6,PCNA,PSMA1,PSMD14,CDKN1A,PSMC3,PSMC1,PSMB4,PSMC5,PSMD7,DYNLL1,PSMC4,PSMC2,CCND3,PSMD2
Cortex	24hrs	aMG	2.17792e-09	3.96412	7.42451e-06	ChemicalGeneticPerturbations	WONG_MITOCHONDRIA_GENE_MODULE	548	24	NDUFC1,ACAT1,COX7A2,UQCR10,COX7B,COX6B1,NDUFB10,COX5B,ATP6AP1,ATP1B3,NDUFAB1,COX7C,UQCRQ,COX4I1,TSPO,NDUFC2,UQCR11,COX6A1,UQCRB,TOMM7,NDUFB8,NDUFA4,MRPS28,SEC61G
Cortex	24hrs	aMG	2.45702e-09	8.76145	8.376e-06	ChemicalGeneticPerturbations	GRADE_METASTASIS_DN	548	11	PDCD5,YWHAG,PSMD8,PSME1,H2AFZ,OAZ1,CLIC1,PSMB4,DYNLL1,PSMC4,AP2S1
Cortex	24hrs	aMG	1.89189e-09	16.7264	8.80294e-06	GObp	GO_REGULATION_OF_TELOMERASE_RNA_LOCALIZATION_TO_CAJAL_BODY	548	7	NHP2,CCT8,NOP10,CCT5,CCT3,CCT2,CCT6A
Cortex	24hrs	aMG	1.89189e-09	16.7264	8.80294e-06	GObp	GO_POSITIVE_REGULATION_OF_TELOMERASE_RNA_LOCALIZATION_TO_CAJAL_BODY	548	7	NHP2,CCT8,NOP10,CCT5,CCT3,CCT2,CCT6A
Cortex	24hrs	aMG	2.06491e-09	3.84574	9.60802e-06	GObp	GO_RESPONSE_TO_ENDOPLASMIC_RETICULUM_STRESS	548	25	JUN,SSR1,TMX4,PDIA3,TMX3,CALR,P4HB,CCDC47,SDF2L1,CCL2,MAP3K5,ATF3,HSPA5,PDIA6,PTPN1,PSMC3,PSMC1,EIF2S1,PSMC5,PDIA4,HSP90B1,DNAJB11,PSMC4,SEC61G,PSMC2
Cortex	24hrs	aMG	2.1203e-09	2.1158	9.86576e-06	GObp	GO_POSITIVE_REGULATION_OF_PROTEIN_MODIFICATION_PROCESS	548	67	CD81,JUN,HSP90AB1,MEF2C,PRKCA,PSMB1,DAB2,TNF,CSF1,SKP1,CALM1,NPTN,PARK7,PSMD4,PSMD8,PSME1,CCL4,CCL4L2,SDC4,PYCARD,MAPK14,PSME2,PSMA2,BANK1,PSMA7,UBA52,MIF,ICAM1,ATP6AP1,IRAK2,GBA,TGFBR1,IL1B,PSMD11,CCL2,SMAD7,PSMB6,GNL3,ERP29,MAP3K5,PSMA1,RALB,TXN,ITGB1,HSPA5,PSMD14,CDKN1A,SART3,PTPN1,PSMC3,PSMC1,PSMB4,GAS6,PSMC5,HCLS1,PHB2,CCL8,DUSP6,PSMD7,PAK2,BIRC3,C5AR1,PSMC4,UBC,PSMC2,CCND3,PSMD2
Cortex	24hrs	aMG	1.51063e-08	4.16771	1.01816e-05	Reactome	REACTOME_MITOTIC_M_M_G1_PHASES	548	20	PSMB1,PSMD4,PSMD8,PSME1,PSME2,PSMA2,PSMA7,UBA52,PSMD11,PSMB6,PSMA1,PSMD14,PSMC3,PSMC1,PSMB4,PSMC5,PSMD7,PSMC4,PSMC2,PSMD2
Cortex	24hrs	aMG	3.00024e-09	4.04104	1.02278e-05	ChemicalGeneticPerturbations	TONKS_TARGETS_OF_RUNX1_RUNX1T1_FUSION_MONOCYTE_UP	548	23	LPL,MT2A,NHP2,CSF1,MDH2,NOP14,C1QBP,NOP56,GTPBP4,NME1,PA2G4,GSPT1,ATP1B3,NDUFAB1,NOLC1,HSPA5,TNPO1,EIF5A,HSPE1,EPRS,CCL8,DUSP6,BCL2A1
Cortex	24hrs	aMG	2.08855e-07	3.58423	1.04428e-05	Hallmark	HALLMARK_ALLOGRAFT_REJECTION	548	20	LY86,EIF3D,TNF,CSF1,EIF3J,CCL4,NCF4,NME1,ICAM1,IL1B,CCL2,STAB1,EIF5A,FCGR2B,HCLS1,SRGN,IL4R,EIF3A,TPD52,CCND3
Cortex	24hrs	aMG	2.20746e-07	4.77897	1.10373e-05	Hallmark	HALLMARK_PI3K_AKT_MTOR_SIGNALING	548	14	YWHAB,ACTR2,PFN1,CFL1,DAPP1,CALR,ARHGDIA,PPP1CA,RALB,ARPC3,CDKN1A,ARF1,HSP90B1,SLA
Cortex	24hrs	aMG	3.33264e-09	2.2757	1.1361e-05	ChemicalGeneticPerturbations	LEE_BMP2_TARGETS_DN	548	56	HSPA4,SSR1,HK2,YWHAG,FUBP1,HNRNPAB,TAF1D,NHP2,CCT8,C1QBP,BZW1,FKBP3,EIF3J,SMARCA5,HDAC1,LUC7L,NOP56,SSB,GTPBP4,TMED5,LDHA,NME1,PA2G4,MPHOSPH10,STIP1,RBM3,GSPT1,SDF2L1,TMEM167A,EIF2S2,MANF,NOLC1,SMAD7,RANBP1,GNL3,CHD1,CRELD2,CCT3,NUCKS1,NOP58,HSPA5,HSPA9,ANP32E,PDE3B,PGD,DDX27,EIF2S1,TRA2A,DDX21,DNAJB11,NARS,CCT6A,IER5,CACYBP,TXNRD1,MLEC
Cortex	24hrs	aMG	2.59895e-09	1.8614	1.20929e-05	GObp	GO_POSITIVE_REGULATION_OF_GENE_EXPRESSION	548	90	CD81,JUN,FOS,H3F3B,RREB1,PDCD5,MEF2C,USP16,JUNB,MAML3,HMGN1,FUBP1,RBPJ,CDK6,HNRNPAB,PFN1,DAB2,TNF,TAF1D,NFIA,CSF1,CREB5,TCF12,GTF2F1,CASK,C1QBP,PARK7,CALR,SMARCA5,ANK2,NCL,H2AFZ,HDAC1,PYCARD,MAPK14,ZFP36,H2AFY,PID1,CPEB1,MED21,SUPT16H,UBA52,RBM3,EGR1,ICAM1,TAF1C,IRAK2,ARID5B,JUND,TGFBR1,IL1B,FLI1,FOSB,SMAD7,HNRNPU,GNL3,NR6A1,KLF6,WWOX,CHD1,ERP29,MEF2A,BTG2,RERE,ATF3,NUCKS1,HSPA5,DHX36,PSMC3,PSMC1…
Cortex	24hrs	aMG	3.64306e-09	4.50846	1.24192e-05	ChemicalGeneticPerturbations	SCHLOSSER_MYC_TARGETS_REPRESSED_BY_SERUM	548	20	HK2,SERBP1,CCT8,SSB,H2AFY,CCT5,ANP32B,NOLC1,RANBP1,TXN,PDIA6,PSMD14,EIF2S1,BTF3,CCT2,CNBP,HSPE1,EPRS,EIF3A,DHX9
Cortex	24hrs	aMG	3.68121e-09	5.56773	1.25493e-05	ChemicalGeneticPerturbations	YAO_TEMPORAL_RESPONSE_TO_PROGESTERONE_CLUSTER_11	548	16	SRRT,SRSF2,NOP56,PA2G4,STIP1,GSPT1,MANF,GNL3,NOP58,HSPA5,PDIA6,HSP90B1,DDX21,EPRS,DNAJB11,FTSJ3
Cortex	24hrs	aMG	2.76363e-09	2.07476	1.28592e-05	GObp	GO_NEGATIVE_REGULATION_OF_CELL_COMMUNICATION	548	69	YWHAB,PSMB1,CSNK1A1,DAB2,TNF,CALM1,C1QBP,PARK7,CALR,PSMD4,PSMD8,PSME1,SNX6,PLCL2,RGS2,HDAC1,PYCARD,RHOH,MAPK14,PSME2,PSMA2,BANK1,PID1,PSMA7,UBA52,TNFAIP3,MIF,EGR1,ICAM1,PTPRO,GBA,TGFBR1,IL1B,PSMD11,SMAD7,PSMB6,NDUFA13,WWOX,PSMA1,ATF3,ITGB1,HSPA5,PSMD14,DNAJA1,PTPN1,TSPO,PDE3B,ARF1,PSMC3,PSMC1,PSMB4,ITGA6,GAS6,RRM2B,DUSP1,INPP5D,PSMC5,CD14,PHB2,LGMN,DUSP6,PSMD7,SLC25A5,PSMC4,AP2S1,GPX1,UBC,PSMC2,P…
Cortex	24hrs	aMG	2.84376e-09	2.22834	1.3232e-05	GObp	GO_REGULATION_OF_CELL_CYCLE	548	59	JUN,PRKCA,USP16,JUNB,PSMB1,CDK6,SKP1,CALM1,CALR,PSMD4,PSMD8,PSME1,ZNF207,PSME2,GTPBP4,PSMA2,H2AFY,RHOB,PID1,PSMA7,PA2G4,UBA52,TNFAIP3,CLIC1,MIF,JUND,TGFBR1,IL1B,PSMD11,HPGD,PSMB6,RANBP1,EIF4G2,PCNA,BTG2,CDK11B,PSMA1,ITGB1,FOXN3,PSMD14,CDKN1A,CDC37,PSMC3,PSMC1,RHEB,MAK,PSMB4,GAS6,DUSP1,PSMC5,PHB2,PSMD7,CDK11A,PSMC4,ZFHX3,UBC,PSMC2,CCND3,PSMD2
Cortex	24hrs	aMG	2.84775e-09	2.17652	1.32506e-05	GObp	GO_REGULATION_OF_ANATOMICAL_STRUCTURE_MORPHOGENESIS	548	62	RREB1,ULK2,GNG5,MEF2C,PRKCA,PSMB1,CSNK1A1,RBPJ,PFN1,CFL1,DAB2,ARPC2,TNF,CSF1,TBC1D5,C1QBP,CALR,PSMD4,PLXNA4,PSMD8,ARHGDIA,PSME1,MAPK14,PSME2,PSMA2,RHOB,PID1,PSMA7,UBA52,TNFAIP3,ICAM1,ALDOA,PTPRO,TGFBR1,IL1B,PSMD11,CCL2,SMAD7,PSMB6,STAB1,CUX1,PSMA1,SEMA5B,PSMD14,PDE3B,PSMC3,PSMC1,PSMB4,PSMC5,PHB2,CLASP2,IL4R,DUSP6,PSMD7,C5AR1,PSMC4,AP2S1,GOLGA4,HEXB,UBC,PSMC2,PSMD2
Cortex	24hrs	aMG	3.18385e-09	3.89238	1.48144e-05	GObp	GO_REGULATION_OF_PROTEIN_STABILITY	548	24	CD81,CTSA,HSP90AB1,PFN1,CCT8,PARK7,CALR,PSMD8,ANK2,PYCARD,ZNF207,GTPBP4,CCT5,ATP1B3,SMAD7,CDC37L1,CCT3,CDKN1A,CDC37,CCT2,PHB2,TOMM7,CCT6A,GAPDH
Cortex	24hrs	aMG	3.18434e-09	4.3508	1.48167e-05	GObp	GO_REGULATION_OF_CELLULAR_KETONE_METABOLIC_PROCESS	548	21	PSMB1,PARK7,PSMD4,PSMD8,PSME1,PSME2,PSMA2,OAZ1,PSMA7,PSMD11,PSMB6,PSMA1,PSMD14,PSMC3,PSMC1,PSMB4,PSMC5,PSMD7,PSMC4,PSMC2,PSMD2
Cortex	24hrs	aMG	3.38531e-09	1.83602	1.57518e-05	GObp	GO_ORGANONITROGEN_COMPOUND_METABOLIC_PROCESS	548	92	SERINC3,CTSA,CTSZ,EEF1A1,NDUFC1,ERH,ACAT1,EIF3CL,HK2,HINT1,EIF3D,EIF4A1,MDH2,CASK,UQCR10,COX7B,MRPL33,P4HB,EIF3J,SPCS2,SDC4,COX6B1,EIF3C,SSB,ARSB,OAZ1,EIF5B,CPEB1,NDUFV3,NDUFB10,LDHA,SPPL2A,NME1,COX5B,UBA52,CLIC1,GSPT1,ALDOA,CPD,GATM,EIF2S2,GBA,GUSB,ENO1,RPL35,IL1B,TALDO1,NDUFAB1,EIF3E,CNDP2,MRPL52,ASAH1,NDUFA13,FHIT,EIF4G2,COX7C,UQCRQ,EEF1G,TKT,PDE4D,COX4I1,TSPO,PDE3B,NDUFC2-KCTD14,NDUFC2,PGD,TP…
Cortex	24hrs	aMG	4.84046e-09	5.84385	1.65011e-05	ChemicalGeneticPerturbations	JUBAN_TARGETS_OF_SPI1_AND_FLI1_DN	548	15	ARPC2,NHP2,SRSF2,EIF3C,TUBB,LDHA,MIF,NOLC1,HNRNPU,CHD1,TPI1,HSPE1,EIF4G1,DDX21,TOMM7
Cortex	24hrs	aMG	3.69142e-09	15.681	1.71762e-05	GObp	GO_MITOCHONDRIAL_ELECTRON_TRANSPORT_CYTOCHROME_C_TO_OXYGEN	548	7	COX7B,COX6B1,COX5B,COX7C,COX4I1,COX6A1,NDUFA4
Cortex	24hrs	aMG	6.15398e-09	4.81464	2.09789e-05	ChemicalGeneticPerturbations	CHUNG_BLISTER_CYTOTOXICITY_UP	548	18	CD81,C1QC,C1QB,TCF12,SDC4,CTSC,MYO7A,CTSB,SUPT16H,TNFAIP3,CNDP2,PSMD14,CDKN1A,PSMC1,TPI1,AKR1A1,GALNT2,PSMD2
Cortex	24hrs	aMG	4.51021e-09	3.59807	2.0986e-05	GObp	GO_LEUKOCYTE_MIGRATION	548	26	SIRPG,SIRPA,TNF,ITGAM,DOCK8,BSG,MERTK,CSF3R,CCL4,CCL4L2,MIF,ICAM1,PTPRO,ATP1B3,IL1B,CCL2,ITGB1,TRPM4,SELPLG,PDE4D,ITGA6,GAS6,CXCL16,INPP5D,CCL8,C5AR1
Cortex	24hrs	aMG	6.42981e-09	2.89051	2.19192e-05	ChemicalGeneticPerturbations	BAELDE_DIABETIC_NEPHROPATHY_DN	548	35	LPL,ULK2,TMX4,ACTG1,PDIA3,HMGN1,HNRNPA3,SKP1,NPTN,SDC4,PSMA2,BST2,TMED5,LUC7L3,MED21,MYL12A,ARID5B,PTPRO,HPGD,RCAN1,SRGAP2,HSPA5,SART3,CANX,DNAJA1,RHEB,TMED10,DUSP1,GLUL,HSP90B1,CACNB2,SET,BIRC3,SEC61G,EID1
Cortex	24hrs	aMG	6.80254e-09	14.7586	2.31899e-05	ChemicalGeneticPerturbations	NGO_MALIGNANT_GLIOMA_1P_LOH	548	7	HSP90AB1,PARK7,P4HB,ENO1,HSPA5,TPM4,GAPDH
Cortex	24hrs	aMG	5.05078e-09	3.68748	2.35013e-05	GObp	GO_PROTEIN_POLYUBIQUITINATION	548	25	ARIH1,PSMB1,SKP1,PSMD4,PSMD8,PSME1,PSME2,PSMA2,PSMA7,UBA52,TNFAIP3,PSMD11,PSMB6,PSMA1,PSMD14,RNF19B,PSMC3,PSMC1,PSMB4,PSMC5,PSMD7,PSMC4,UBC,PSMC2,PSMD2
Cortex	24hrs	aMG	7.11979e-09	8.04623	2.42714e-05	ChemicalGeneticPerturbations	APRELIKOVA_BRCA1_TARGETS	548	11	PDIA3,EIF3C,TCEA1,ATP6AP1,DNAJA1,ARF1,PSMC1,EIF2S1,DDX21,EPRS,PSMC2
Cortex	24hrs	aMG	7.15366e-09	4.34452	2.43868e-05	ChemicalGeneticPerturbations	BROWN_MYELOID_CELL_DEVELOPMENT_UP	548	20	SIRPA,JUNB,DAB2,TNF,ITGAM,CD52,RNASE4,CD33,EGR1,CPD,IL1B,CNDP2,FCGR1A,PGD,FCGR2A,SLFN12,SLFN12L,BCL2A1,C5AR1,HEXB
Cortex	24hrs	aMG	1.16527e-07	13.4409	2.52865e-05	Biocarta	BIOCARTA_EIF_PATHWAY	548	6	EIF4A1,EIF2S2,EIF4G2,EIF2S1,EIF4G1,EIF3A
Cortex	24hrs	aMG	7.46912e-09	3.41958	2.54622e-05	ChemicalGeneticPerturbations	PASQUALUCCI_LYMPHOMA_BY_GC_STAGE_UP	548	27	CTSZ,SSR1,TGM2,PDIA3,MT2A,SPINT1,TANC2,REXO2,P4HB,DYNLL2,SPCS2,SLAMF9,SSR2,RHOB,SSR3,GUSB,MANF,CRELD2,BTG2,PDIA6,SELPLG,TMED10,LPIN2,PDIA4,HSP90B1,NARS,SURF4
Cortex	24hrs	aMG	8.94365e-09	4.70921	3.04889e-05	ChemicalGeneticPerturbations	MCBRYAN_PUBERTAL_BREAST_5_6WK_DN	548	18	SIRPA,MEF2C,YWHAG,FUBP1,SRSF2,SDC4,EIF3C,MAPK14,SPPL2A,PDAP1,CPD,NDUFAB1,MORF4L1,CUX1,DHX36,EIF4G1,ZBTB20,ZFHX3
Cortex	24hrs	aMG	9.13296e-09	7.8853	3.11343e-05	ChemicalGeneticPerturbations	CHIBA_RESPONSE_TO_TSA	548	11	H3F3B,TGM2,BSG,SDC4,RHOB,CDKN1A,TPI1,DUSP1,CDK11A,PRDX1,TXNRD1
Cortex	24hrs	aMG	9.17197e-09	5.60036	3.12672e-05	ChemicalGeneticPerturbations	ZAMORA_NOS2_TARGETS_DN	548	15	CD81,CTSZ,EEF1A1,PDIA3,NFIA,FKBP3,GNB2,PPP1CA,EIF2S2,FTL,EEF1G,ACTB,EIF5A,PDIA4,UBC
Cortex	24hrs	aMG	6.78611e-09	2.29149	3.15758e-05	GObp	GO_NEGATIVE_REGULATION_OF_CATALYTIC_ACTIVITY	548	53	ARL6IP1,CSTB,PRKCA,YWHAG,PSMB1,UBXN1,SPINT1,TNF,PARK7,PSMD4,PSMD8,PSME1,SNX6,RGS2,PYCARD,RHOH,PSME2,PSMA2,BST2,H2AFY,OAZ1,PSMA7,MPHOSPH10,UBA52,TNFAIP3,GBA,IL1B,PSMD11,SMAD7,PSMB6,PSMA1,PSMD14,CDKN1A,DNAJA1,PTPN1,ANP32E,PSMC3,PSMC1,PSMB4,GAS6,DUSP1,PSMC5,SET,DUSP6,PSMD7,TXNIP,PAK2,BIRC3,PSMC4,GPX1,UBC,PSMC2,PSMD2
Cortex	24hrs	aMG	7.13282e-09	6.11942	3.3189e-05	GObp	GO_REGULATION_OF_TRANSLATIONAL_INITIATION	548	14	EIF3CL,EIF3D,EIF4A1,TNF,EIF3J,EIF3C,BANK1,EIF5B,PPP1CA,EIF3E,EIF4G2,EIF2S1,EIF4G1,EIF3A
Cortex	24hrs	aMG	9.90556e-09	3.29044	3.3768e-05	ChemicalGeneticPerturbations	BORCZUK_MALIGNANT_MESOTHELIOMA_UP	548	28	HSPA4,SSR1,HSP90AB1,PRKCA,NHP2,SKP1,SERBP1,PARK7,PSMD8,H2AFZ,PSMA2,H2AFY,CCT5,MED21,NME1,STIP1,PSMB6,CCT3,PCNA,DNAJA1,TNPO1,CCT2,EPRS,PAK2,AP2S1,SEC61G,NAP1L1,PSMD2
Cortex	24hrs	aMG	7.4592e-09	4.1585	3.47076e-05	GObp	GO_REGULATION_OF_PROTEASOMAL_PROTEIN_CATABOLIC_PROCESS	548	21	ARIH1,HSP90AB1,CSNK1A1,UBXN1,DAB2,PARK7,PSME1,ZNF207,PSME2,GBA,SMAD7,FHIT,PSMD14,RNF19B,PSMC3,PSMC1,DUSP1,PSMC5,PSMC4,GPX1,PSMC2
Cortex	24hrs	aMG	1.14715e-08	3.269	3.91062e-05	ChemicalGeneticPerturbations	LI_INDUCED_T_TO_NATURAL_KILLER_UP	548	28	CSTB,DENND4A,HK2,JUNB,SLC24A3,TNF,SH3BGRL3,CD52,CCL4,GPR34,NCF4,ARSB,EGR1,SDF2L1,ALDOA,IRAK2,LAT2,ASAH1,FTL,SRGAP2,CDKN1A,TSPO,MYL6,EVI2A,FCGR2A,TUBA1C,DUSP6,CD63
Cortex	24hrs	aMG	9.73908e-09	2.09274	4.5316e-05	GObp	GO_NEGATIVE_REGULATION_OF_MOLECULAR_FUNCTION	548	63	JUN,ARL6IP1,CSTB,PRKCA,YWHAG,PSMB1,UBXN1,ADAM15,SPINT1,DAB2,TNF,CALM1,PARK7,PSMD4,PSMD8,PSME1,SNX6,RGS2,PYCARD,RHOH,PSME2,GTPBP4,PSMA2,BST2,H2AFY,OAZ1,PSMA7,PPP1CA,MPHOSPH10,UBA52,TNFAIP3,IRAK2,GBA,IL1B,PSMD11,SMAD7,PSMB6,PSMA1,RALB,HSPA5,PSMD14,CDKN1A,DNAJA1,PTPN1,ANP32E,PSMC3,PSMC1,PSMB4,GAS6,DUSP1,PSMC5,PHB2,SET,DUSP6,PSMD7,TXNIP,PAK2,BIRC3,PSMC4,GPX1,UBC,PSMC2,PSMD2
Cortex	24hrs	aMG	1.33091e-08	3.6296	4.53709e-05	ChemicalGeneticPerturbations	HOSHIDA_LIVER_CANCER_SUBCLASS_S1	548	24	MFAP1,C1QB,ADAM15,PFN1,DAB2,ARPC2,CTSC,OAZ1,ALDOA,ATP6AP1,ATP1B3,ASAH1,LCP1,RALB,ARPC1B,FCGR2A,HCLS1,SRGN,LGMN,BCL2A1,AP2S1,SLA,PSMD2,M6PR
Cortex	24hrs	aMG	1.36478e-08	5.12033	4.65253e-05	ChemicalGeneticPerturbations	LAIHO_COLORECTAL_CANCER_SERRATED_UP	548	16	SERF2,MFAP1,CSNK1A1,ADAM10,DAD1,ARPC2,NOP10,NPTN,PSMD4,CTSB,NEDD8,ARL8B,PDIA6,ANP32E,MYL6,EPRS
Cortex	24hrs	aMG	1.36968e-08	9.77517	4.66924e-05	ChemicalGeneticPerturbations	APPEL_IMATINIB_RESPONSE	548	9	MSR1,CTSA,CTSZ,CTSB,GBA,GUSB,ASAH1,C5AR1,HEXB
Cortex	24hrs	aMG	1.47564e-08	7.58202	5.03045e-05	ChemicalGeneticPerturbations	NATSUME_RESPONSE_TO_INTERFERON_BETA_DN	548	11	HINT1,SKP1,BAG1,FTL,TXN,COX4I1,GAS6,COX6A1,GAPDH,CD63,PRDX1
Cortex	24hrs	aMG	1.52297e-08	2.89901	5.19179e-05	ChemicalGeneticPerturbations	RUTELLA_RESPONSE_TO_HGF_VS_CSF2RB_AND_IL4_UP	548	33	CD81,LY86,TGM2,TMX4,ACAT1,MEF2C,HK2,MT2A,DAB2,DAD1,C1QA,MCTP1,HADHA,CD52,PLCL2,CTSB,PID1,EGR1,CPD,DOCK4,IL1B,CCL2,ASAH1,RERE,EIF2S1,CD14,CCL8,NARS,DUSP6,CD63,C5AR1,PRDX1,HEXB
Cortex	24hrs	aMG	1.5323e-08	3.22696	5.2236e-05	ChemicalGeneticPerturbations	JIANG_HYPOXIA_NORMAL	548	28	JUN,H3F3B,EEF1A1,TGM2,SIRPA,ADAM10,SERBP1,BSG,P4HB,CSDE1,NCL,NMT1,SDC4,ZFP36,CPD,EIF2S2,ATP1B3,HNRNPU,KLF6,NUCKS1,HSPA5,CANX,DUSP1,HSP90B1,TUBA1B,NARS,TXNIP,NAP1L1
Cortex	24hrs	aMG	7.9091e-08	11.4044	5.33073e-05	Reactome	REACTOME_FORMATION_OF_TUBULIN_FOLDING_INTERMEDIATES_BY_CCT_TRIC	548	7	CCT8,CCT5,CCT3,CCT2,TUBA1B,TUBA1C,CCT6A
Cortex	24hrs	aMG	1.41243e-08	8.53388	6.57204e-05	GObp	GO_MITOCHONDRIAL_ELECTRON_TRANSPORT_NADH_TO_UBIQUINONE	548	10	NDUFC1,NDUFV3,NDUFB10,NDUFAB1,NDUFA13,NDUFC2-KCTD14,NDUFC2,NDUFB8,NDUFA4,NDUFA2
Cortex	24hrs	aMG	1.92837e-08	6.72043	6.57381e-05	ChemicalGeneticPerturbations	RHODES_CANCER_META_SIGNATURE	548	12	SSR1,HNRNPA2B1,HDAC1,TUBB,PSME2,CCT5,LDHA,NME1,MANF,CANX,HSPE1,PSMC4
Cortex	24hrs	aMG	2.02579e-08	3.55461	6.90592e-05	ChemicalGeneticPerturbations	WINTER_HYPOXIA_METAGENE	548	24	JUN,FOS,TGM2,ACAT1,SIRPA,HK2,RBPJ,HDAC1,LDHA,TNFAIP3,MIF,EGR1,ICAM1,ALDOA,ENO1,FTL,TXN,HSPA5,CDKN1A,TPI1,TXNIP,CCT6A,GAPDH,TPD52
Cortex	24hrs	aMG	1.4863e-08	2.21959	6.91576e-05	GObp	GO_NEGATIVE_REGULATION_OF_CELL_DEATH	548	54	JUN,ARL6IP1,HSP90AB1,MEF2C,PRKCA,CFL1,DAB2,DAD1,TNF,DOCK8,PARK7,MERTK,ARHGDIA,NCL,HDAC1,CTSB,PA2G4,UBA52,TNFAIP3,MIF,ICAM1,TGFBR1,BAG1,IL1B,CCL2,NDUFA13,BTG2,SRGAP2,TXN,ITGB1,HSPA5,HSPA9,CDKN1A,DNAJA1,PTPN1,PSMC1,ITGA6,GAS6,RRM2B,DUSP1,SLC25A4,PSMC5,HSP90B1,HCLS1,PHB2,LGMN,SET,PAK2,SLC25A5,BIRC3,BCL2A1,C5AR1,GPX1,UBC
Cortex	24hrs	aMG	2.036e-08	3.18598	6.94071e-05	ChemicalGeneticPerturbations	RUTELLA_RESPONSE_TO_CSF2RB_AND_IL4_DN	548	28	LY86,TMX4,ACAT1,MS4A6A,MEF2C,HK2,MT2A,DAB2,C1QA,MCTP1,HADHA,CD52,PLCL2,RGS2,ZFP36,RNASE4,CTSB,PID1,EGR1,CPD,IL1B,CCL2,ASAH1,RERE,CD14,DUSP6,C5AR1,HEXB
Cortex	24hrs	aMG	2.06499e-08	6.13092	7.03954e-05	ChemicalGeneticPerturbations	NAKAYAMA_SOFT_TISSUE_TUMORS_PCA1_UP	548	13	C1QB,C1QA,ITGAM,CD52,NCF4,CTSC,TMEM176B,CCL2,FCGR2C,FCGR2B,CD14,IL4R,SLA
Cortex	24hrs	aMG	2.09271e-08	3.66388	7.13404e-05	ChemicalGeneticPerturbations	THEILGAARD_NEUTROPHIL_AT_SKIN_WOUND_DN	548	23	ADAM10,CALM1,CSF3R,RGS2,NCF4,GNB2,OAZ1,PPP1CA,COX5B,FLI1,EIF4G2,MAP3K5,RERE,TKT,ARPC3,SELPLG,PDE3B,UQCR11,INPP5D,HCLS1,TUBA1B,SET,DHX9
Cortex	24hrs	aMG	3.84626e-07	4.09626	7.15405e-05	Kegg	KEGG_SYSTEMIC_LUPUS_ERYTHEMATOSUS	548	16	H3F3B,C1QC,C1QB,TNF,C1QA,H2AFZ,SSB,H2AFY,SNRPD1,FCGR1A,SNRPD3,FCGR2C,FCGR2A,FCGR2B,FCGR3A,FCGR3B
Cortex	24hrs	aMG	1.06454e-07	2.72435	7.17499e-05	Reactome	REACTOME_CELL_CYCLE	548	32	YWHAG,PSMB1,CDK6,NHP2,SKP1,PSMD4,PSMD8,SMARCA5,PSME1,H2AFZ,HDAC1,TUBB,PSME2,PSMA2,PSMA7,UBA52,PSMD11,PSMB6,PCNA,PSMA1,PSMD14,CDKN1A,PSMC3,PSMC1,PSMB4,PSMC5,PSMD7,DYNLL1,PSMC4,PSMC2,CCND3,PSMD2
Cortex	24hrs	aMG	1.61476e-08	2.19524	7.51346e-05	GObp	GO_OXIDATION_REDUCTION_PROCESS	548	55	TMX4,NDUFC1,PDIA3,HK2,TMX3,MDH2,CALM1,UQCR10,COX7B,PARK7,SH3BGRL3,AGMO,HADHA,HSD17B12,HEPH,COX6B1,NCF4,MAPK14,PID1,NDUFV3,PPP1CA,NDUFB10,TECR,LDHA,COX5B,CYB5R3,UBA52,ALDOA,ENO1,NDUFAB1,HPGD,NDUFA13,STAB1,WWOX,COX7C,UQCRQ,TXN,COX4I1,NDUFC2-KCTD14,NDUFC2,PGD,TPI1,RRM2B,UQCR11,COX6A1,UQCRB,NDUFB8,NDUFA4,GAPDH,AKR1A1,PRDX1,GPX1,UBC,NDUFA2,TXNRD1
Cortex	24hrs	aMG	2.2817e-08	5.63811	7.7783e-05	ChemicalGeneticPerturbations	LEE_AGING_NEOCORTEX_UP	548	14	CTSZ,FOS,C1QC,JUNB,C1QA,HSD17B12,TUBB,ATP1B3,WWOX,HSP90B1,SET,GPX1,UBC,M6PR
Cortex	24hrs	aMG	2.2817e-08	5.63811	7.7783e-05	ChemicalGeneticPerturbations	SWEET_KRAS_ONCOGENIC_SIGNATURE	548	14	SIRPA,UBXN1,MT2A,ITGAM,BSG,NMT1,FKBP2,MANF,EIF3E,CDKN1A,FCGR2A,PHB2,DUSP6,SLC25A5
Cortex	24hrs	aMG	2.331e-08	7.30121	7.94637e-05	ChemicalGeneticPerturbations	JIANG_AGING_CEREBRAL_CORTEX_DN	548	11	HSP90AB1,CSNK1A1,PFN1,DAD1,SKP1,CSDE1,NCL,NME1,ATP6AP1,EEF1G,DNAJB11
Cortex	24hrs	aMG	2.34154e-08	4.94376	7.98231e-05	ChemicalGeneticPerturbations	HAHTOLA_MYCOSIS_FUNGOIDES_CD4_DN	548	16	CD81,HINT1,FUBP1,HNRNPA3,CALM1,C1QBP,LUC7L3,EIF5B,GSPT1,PTPRO,NUCKS1,SNX1,RBM8A,CACYBP,TPD52,NAP1L1
Cortex	24hrs	aMG	2.44443e-08	3.89994	8.33306e-05	ChemicalGeneticPerturbations	CHIANG_LIVER_CANCER_SUBCLASS_UNANNOTATED_DN	548	21	HSP90AB1,DAD1,C1QBP,PSMD8,H2AFZ,PSMA2,SNRPD1,MED21,STIP1,ALDOA,MANF,PCNA,PDIA6,DNAJA1,PSMC3,PGD,CCT2,CHCHD2,SLC25A5,NDUFA4,FCGR3A
Cortex	24hrs	aMG	1.79562e-08	2.53806	8.355e-05	GObp	GO_PROTEIN_CATABOLIC_PROCESS	548	41	CTSA,CTSZ,ARIH1,USP16,PSMB1,CSNK1A1,UBXN1,SKP1,USP6,USP32,PSMD4,PSMD8,PSME1,CTSC,PSME2,PSMA2,CTSB,PSMA7,NEDD8,CCDC47,UBA52,TNFAIP3,SDF2L1,PSMD11,PSMB6,RANBP1,PSMA1,HSPA5,PSMD14,RNF19B,PSMC3,PSMC1,PSMB4,PSMC5,HSP90B1,LGMN,PSMD7,PSMC4,UBC,PSMC2,PSMD2
Cortex	24hrs	aMG	2.51467e-08	4.04998	8.57251e-05	ChemicalGeneticPerturbations	HAHTOLA_MYCOSIS_FUNGOIDES_SKIN_UP	548	20	LY86,ERH,PFN1,DAB2,CALM1,CASK,CD52,SNX6,SSR2,SUPT16H,PTPRO,JUND,HNRNPU,NUCKS1,SART3,TNPO1,PDIA4,EIF3A,TXNIP,SLA
Cortex	24hrs	aMG	1.87749e-08	2.16757	8.73595e-05	GObp	GO_MACROMOLECULE_CATABOLIC_PROCESS	548	56	CTSA,CTSZ,ARIH1,USP16,PSMB1,CSNK1A1,UBXN1,EIF4A1,SKP1,CALM1,USP6,USP32,PSMD4,CSDE1,PSMD8,PSME1,SDC4,CTSC,ZFP36,PSME2,PSMA2,ARSB,CTSB,DNASE2,PSMA7,NEDD8,CCDC47,UBA52,TNFAIP3,GSPT1,SDF2L1,GUSB,RPL35,PSMD11,EIF3E,PSMB6,RANBP1,PSMA1,HSPA5,PSMD14,DIS3L2,RNF19B,PSMC3,PSMC1,PSMB4,RBM8A,PSMC5,HSP90B1,EIF4G1,LGMN,PSMD7,PSMC4,HEXB,UBC,PSMC2,PSMD2
Cortex	24hrs	aMG	2.58337e-08	9.21659	8.80669e-05	ChemicalGeneticPerturbations	GUTIERREZ_MULTIPLE_MYELOMA_UP	548	9	CSDE1,RHOB,PSENEN,SSR3,COX7C,CANX,ARF1,RHEB,EID1
Cortex	24hrs	aMG	1.32283e-07	3.55042	8.91585e-05	Reactome	REACTOME_ANTIGEN_PROCESSING_UBIQUITINATION_PROTEASOME_DEGRADATION	548	21	PSMB1,SKP1,PSMD4,PSMD8,PSME1,PSME2,PSMA2,PSMA7,UBA52,PSMD11,PSMB6,PSMA1,PSMD14,PSMC3,PSMC1,PSMB4,PSMC5,PSMD7,PSMC4,PSMC2,PSMD2
Cortex	24hrs	aMG	2.65014e-08	2.20121	9.03434e-05	ChemicalGeneticPerturbations	ACEVEDO_LIVER_TUMOR_VS_NORMAL_ADJACENT_TISSUE_UP	548	53	CSTB,SSR1,GNG5,PDCD5,HSP90AB1,MFAP1,HMGN4,PFN1,DAD1,NHP2,SRSF2,CCT8,COX7A2,NOP10,CASK,MRPL33,REXO2,C1QBP,EIF3J,H2AFZ,SPCS2,GTPBP4,SSR2,PPP1CA,NEDD8,DYNLRB1,COPE,DOCK10,SDF2L1,GBA,RANBP1,PDIA6,CANX,PTPN1,RHEB,TMED10,PSMB4,BTF3,CCT2,SLC25A4,COX6A1,BBX,UQCRB,DDX21,EPRS,TUBA1C,DNAJB11,SET,DYNLL1,GOLGA4,SEC61G,TXNRD1,PSMD2
Cortex	24hrs	aMG	2.66864e-08	5.57547	9.0974e-05	ChemicalGeneticPerturbations	HILLION_HMGA1_TARGETS	548	14	FOS,HSP90AB1,CFL1,NME1,MIF,ALDOA,PSMB6,PCNA,PSMA1,COX4I1,MAK,SLC25A5,C5AR1,AKR1A1
Cortex	24hrs	aMG	2.01974e-08	3.94078	9.39785e-05	GObp	GO_RESPONSE_TO_REACTIVE_OXYGEN_SPECIES	548	21	JUN,FOS,HBA2,HBA1,SLC8A1,ROMO1,PARK7,P4HB,RHOB,LDHA,TNFAIP3,IL1B,KLF6,MAP3K5,TXN,KLF2,DUSP1,TXNIP,PRDX1,GPX1,TXNRD1
Cortex	24hrs	aMG	2.85519e-08	2.43478	9.73335e-05	ChemicalGeneticPerturbations	RODRIGUES_THYROID_CARCINOMA_POORLY_DIFFERENTIATED_UP	548	43	HSPA4,CTSA,SSR1,PDCD5,ACTR2,USP16,CSNK1A1,CCT8,PSMD8,H2AFZ,CTSC,GTPBP4,PSMA2,ARSB,TMED5,EIF5B,SNRPD1,NDUFV3,SUPT16H,NME1,MPHOSPH10,SSR3,GSPT1,TMEM167A,EIF2S2,ATP1B3,ENO1,NOLC1,EIF4G2,PCNA,ITGB1,NOP58,HSPA9,PSMD14,CANX,TPM4,EIF2S1,EIF5A,EPRS,DHX9,CCT6A,AP2S1,CACYBP
Cortex	24hrs	aMG	3.05768e-08	2.1041	0.000104236	ChemicalGeneticPerturbations	BENPORATH_NANOG_TARGETS	548	58	JUN,SERINC3,HSPA4,OLFML3,ARIH1,ERH,USP16,LARP7,PSMB1,HNRNPA2B1,CDK6,EIF3D,HMGN4,CFL1,ROMO1,UQCR10,CALR,HSD17B12,H2AFZ,NMT1,SDC4,MAPK14,PSENEN,CLIC1,COPE,ARID5B,TALDO1,ANP32B,NOLC1,MORF4L1,ASAH1,NDUFA13,FHIT,EIF4G2,MEF2A,PCNA,SLC1A1,PSMA1,NUCKS1,ITGB1,HSPA5,FOXN3,PSMD14,SART3,PTPN1,SNX1,TMED10,PSMB4,TNPO1,COX6A1,CNBP,MYO3A,SET,DUSP6,GOLGA4,UBC,PSMC2,TXNRD1
Cortex	24hrs	aMG	3.11303e-08	2.81618	0.000106123	ChemicalGeneticPerturbations	MOOTHA_PGC	548	33	FOS,ARIH1,NDUFC1,ACTR2,HBA1,MT2A,SPINT1,MDH2,COX7A2,NOP10,UQCR10,COX7B,BSG,GTPBP4,LDHA,COX5B,ENO1,MANF,NDUFAB1,COX7C,HSPA5,HSPA9,TPI1,DUSP1,SLC25A4,COX6A1,HSPE1,UQCRB,PHB2,DUSP6,SLC25A5,GAPDH,UBC
Cortex	24hrs	aMG	3.62677e-08	5.45426	0.000123636	ChemicalGeneticPerturbations	HILLION_HMGA1B_TARGETS	548	14	FOS,HSP90AB1,COX7A2,NME1,MIF,PSMB6,PCNA,PSMA1,COX4I1,MAK,PSMB4,SLC25A5,AKR1A1,CCND3
Cortex	24hrs	aMG	3.67024e-08	15.361	0.000125119	ChemicalGeneticPerturbations	VISALA_RESPONSE_TO_HEAT_SHOCK_AND_AGING_DN	548	6	STIP1,CUX1,FCGR2A,TRA2A,HSPE1,DYNLL1
Cortex	24hrs	aMG	2.62256e-06	4.48029	0.000131128	Hallmark	HALLMARK_PROTEIN_SECRETION	548	12	ADAM10,CTSC,COPE,ANP32E,ARF1,TMED10,COPB1,CD63,AP2S1,GOLGA4,TPD52,M6PR
Cortex	24hrs	aMG	3.89408e-08	3.80146	0.000132749	ChemicalGeneticPerturbations	ALONSO_METASTASIS_UP	548	21	MFAP1,PRKCA,PFN1,DAD1,NHP2,SKP1,BZW1,COX6B1,RNASE4,CTSB,CCT5,ARID5B,ENO1,NDUFAB1,UBL5,CDKN1A,BTF3,CHCHD2,SET,CD63,TXNRD1
Cortex	24hrs	aMG	3.97855e-08	7.7918	0.000135629	ChemicalGeneticPerturbations	BRACHAT_RESPONSE_TO_CAMPTOTHECIN_DN	548	10	FKBP3,SSB,TUBB,NDUFV3,ALDOA,ENO1,ANP32E,BTF3,SLC25A5,GAPDH
Cortex	24hrs	aMG	2.93009e-08	2.27791	0.000136337	GObp	GO_REGULATION_OF_CELLULAR_COMPONENT_MOVEMENT	548	49	CD81,JUN,RREB1,PRKCA,CDK6,ADAM15,PFN1,ADAM10,DAB2,TNF,RAC2,CSF1,SLC8A1,C1QBP,SH3BGRL3,CALR,PLXNA4,ANK2,CCL4,SDC4,PYCARD,MAPK14,GTPBP4,BST2,ARSB,RHOB,CPEB1,DOCK10,ICAM1,PTPRO,DOCK4,TGFBR1,IL1B,CCL2,SMAD7,SRGAP2,ITGB1,TRPM4,HSPA5,SEMA5B,PDE4D,NISCH,GAS6,CXCL16,CCL8,CLASP2,CD63,C5AR1,P2RY12
Cortex	24hrs	aMG	4.00013e-08	2.64953	0.000136364	ChemicalGeneticPerturbations	RODWELL_AGING_KIDNEY_UP	548	36	MSR1,MS4A6A,C1QC,UBXN1,C1QB,PFN1,RAC2,C1QA,SSR4,P4HB,PSME2,TMED3,DOCK11,CLIC1,IRAK2,RPL35,CCL2,STAB1,CRELD2,TKT,SELPLG,KRTCAP2,CANX,ARPC1B,CXCL16,EVI2A,PDIA4,HCLS1,SRGN,CD14,CMTM3,BIRC3,BCL2A1,COL27A1,GPX1,CCND3
Cortex	24hrs	aMG	4.13274e-08	10.2407	0.000140885	ChemicalGeneticPerturbations	MOREIRA_RESPONSE_TO_TSA_UP	548	8	HSP90AB1,HMGN1,EIF4A1,SSR4,PA2G4,MIF,SELPLG,PSMB4
Cortex	24hrs	aMG	3.13958e-08	2.98686	0.000146085	GObp	GO_POSITIVE_REGULATION_OF_CELLULAR_PROTEIN_LOCALIZATION	548	30	PDCD5,HSP90AB1,YWHAB,YWHAG,DAB2,TNF,RAC2,CCT8,NPTN,PARK7,PSMD8,DYNLL2,NMT1,MAPK14,OAZ1,CCT5,TGFBR1,IL1B,ANP32B,CCL2,GNL3,UBL5,CCT3,ITGB1,GAS6,CCT2,HCLS1,TOMM7,DYNLL1,CCT6A
Cortex	24hrs	aMG	4.66157e-08	8.7184	0.000158913	ChemicalGeneticPerturbations	UZONYI_RESPONSE_TO_LEUKOTRIENE_AND_THROMBIN	548	9	ADAMTS1,RGS2,ZFP36,EGR1,ARID5B,RCAN1,ATF3,KLF2,DUSP1
Cortex	24hrs	aMG	4.82026e-08	5.75247	0.000164323	ChemicalGeneticPerturbations	HARRIS_HYPOXIA	548	13	JUN,FOS,TGM2,HK2,LDHA,MIF,ALDOA,ENO1,CCL2,FTL,TXN,CDKN1A,GAPDH
Cortex	24hrs	aMG	3.65624e-08	2.12624	0.000170125	GObp	GO_PROTEIN_PHOSPHORYLATION	548	56	ULK2,YWHAB,MEF2C,PRKCA,PSMB1,CSNK1A1,CDK6,ADAM10,TNF,SKP1,CALM1,CASK,NPTN,PSMD4,CSF2RB,MERTK,PSMD8,PSME1,MAPK14,PSME2,PSMA2,PSMA7,UBA52,IRAK2,TGFBR1,IL1B,PSMD11,CCL2,SMAD7,PSMB6,MEF2A,CUX1,MAP3K5,CDK11B,PSMA1,PSMD14,PTPN1,CDC37,PSMC3,PSMC1,MAK,PSMB4,GAS6,EIF2S1,PSMC5,MYO3A,CCL8,DUSP6,PSMD7,PAK2,PASK,CDK11A,PSMC4,UBC,PSMC2,PSMD2
Cortex	24hrs	aMG	4.99415e-08	6.23344	0.00017025	ChemicalGeneticPerturbations	YAO_TEMPORAL_RESPONSE_TO_PROGESTERONE_CLUSTER_10	548	12	HNRNPA3,HBA2,DAD1,SSB,LDHA,FKBP2,PCNA,CANX,DYNLL1,BOLA2,CACYBP,PRDX1
Cortex	24hrs	aMG	3.67024e-08	15.361	0.000170776	GObp	GO_REGULATION_OF_PROTEIN_LOCALIZATION_TO_CHROMOSOME_TELOMERIC_REGION	548	6	CCT8,H2AFY,CCT5,GNL3,CCT2,CCT6A
Cortex	24hrs	aMG	5.21691e-08	2.7571	0.000177844	ChemicalGeneticPerturbations	MOOTHA_HUMAN_MITODB_6_2002	548	33	NDUFC1,ACAT1,MDH2,COX7A2,COX7B,MRPL33,REXO2,HADHA,COX6B1,DNASE2,COX5B,CYB5R3,GATM,NDUFAB1,SLC1A1,COX7C,TXN,HSPA9,COX4I1,TSPO,NDUFC2,UQCR11,SLC25A4,COX6A1,HCLS1,HSPE1,UQCRB,NDUFB8,SLC25A5,NDUFA4,MRPS28,BCL2A1,NDUFA2
Cortex	24hrs	aMG	1.01213e-06	5.78102	0.000188256	Kegg	KEGG_NOD_LIKE_RECEPTOR_SIGNALING_PATHWAY	548	10	HSP90AB1,TNF,PYCARD,MAPK14,TNFAIP3,IL1B,CCL2,HSP90B1,CCL8,BIRC3
Cortex	24hrs	aMG	4.14144e-08	2.60543	0.000192701	GObp	GO_ENDOCYTOSIS	548	37	CD81,FCGR1B,MSR1,TGM2,ACTG1,HSP90AB1,ACTR2,CSNK1A1,HBA2,HBA1,DAB2,ARPC2,CALR,MERTK,NCL,SNX6,PYCARD,MYO7A,NME1,ELMO1,FCGR1A,STAB1,ITGB1,PDIA6,ARPC3,CANX,SNX1,ARPC1B,GAS6,ACTB,CXCL16,FCGR2A,HSP90B1,CD14,FCGR3A,AP2S1,M6PR
Cortex	24hrs	aMG	6.17412e-08	2.73795	0.000210476	ChemicalGeneticPerturbations	GRYDER_PAX3FOXO1_TOP_ENHANCERS	548	33	ACTG1,RBPJ,ADAM10,SLC24A3,ARPC2,MDH2,TCF12,UQCR10,PARK7,INPP4B,PSMD8,MIF,ELMO1,RSL1D1,NDUFAB1,NOLC1,PSMB6,SNX29,RERE,ATF3,ITGB1,SNRPD3,TEX261,RRM2B,ACTB,TNPO1,IL4R,TMCC3,IER5,RIMKLB,TXNRD1,GALNT2,M6PR
Cortex	24hrs	aMG	6.83675e-08	2.05623	0.000233065	ChemicalGeneticPerturbations	KRIGE_RESPONSE_TO_TOSEDOSTAT_24HR_DN	548	58	CD81,FCGR1B,LPL,SRRT,RRP1,PDCD5,ACAT1,FUBP1,CDK6,ADAM15,NHP2,SERBP1,NOP14,COX7B,C1QBP,CALR,ARHGDIA,NCL,LUC7L,NOP56,SSB,GTPBP4,PSMA2,H2AFY,LUC7L3,EIF5B,PSMA7,NDUFB10,LDHA,TMED3,NME1,PA2G4,MIF,STIP1,PDAP1,GSPT1,EGR1,SDF2L1,BAG1,NDUFAB1,NOLC1,RANBP1,BDP1,ASAH1,GNL3,UBL5,CCT3,FOXN3,DNAJA1,TEX261,EIF5A,SRGN,HSPE1,DDX21,PRDX1,RBM28,PSMC2,GALNT2
Cortex	24hrs	aMG	5.19163e-08	2.92193	0.000241567	GObp	GO_GLYCOSYL_COMPOUND_METABOLIC_PROCESS	548	30	NDUFC1,ERH,HK2,CASK,UQCR10,COX7B,COX6B1,NDUFV3,NDUFB10,LDHA,NME1,COX5B,ALDOA,ENO1,NDUFAB1,NDUFA13,COX7C,UQCRQ,COX4I1,NDUFC2-KCTD14,NDUFC2,TPI1,UQCR11,COX6A1,UQCRB,NDUFB8,NDUFA4,GAPDH,MACROD2,NDUFA2
Cortex	24hrs	aMG	7.13454e-08	6.05785	0.000243216	ChemicalGeneticPerturbations	MARTINEZ_RESPONSE_TO_TRABECTEDIN_UP	548	12	CTSA,PDIA3,JUNB,SKP1,COX7A2,COX6B1,UBA52,NDUFA13,ATF3,CDC37,UQCRB,NDUFA2
Cortex	24hrs	aMG	7.14614e-08	2.17355	0.000243612	ChemicalGeneticPerturbations	MARTENS_TRETINOIN_RESPONSE_DN	548	51	JUN,H3F3B,EEF1A1,ACTG1,HSP90AB1,MFAP1,HINT1,HNRNPA2B1,HMGN1,HNRNPA3,HMGN2,NAP1L4,SERBP1,ROMO1,CALR,EIF3J,NOP56,CTSC,CCT5,NDUFB10,PSENEN,PA2G4,RBM3,MYL12A,FKBP2,RSL1D1,RPL35,NOLC1,HNRNPU,LAT2,GNL3,ERP29,PCNA,COX7C,UQCRQ,HSPA5,COX4I1,EIF5A,EIF5AL1,CNBP,GLUL,HSPE1,CHCHD2,UQCRB,PHB2,TUBA1B,TUBA1C,PSMD7,TXNIP,CCT6A,CACYBP
Cortex	24hrs	aMG	7.28043e-08	3.67165	0.00024819	ChemicalGeneticPerturbations	TAKEDA_TARGETS_OF_NUP98_HOXA9_FUSION_8D_DN	548	21	JUN,C1QC,C1QB,DAB2,C1QA,CREB5,ITGAM,RHOH,GPR34,CTSB,PID1,DOCK4,CUX1,KLF2,FCGR2C,FCGR2B,GLUL,CD14,LGMN,TMCC3,C5AR1
Cortex	24hrs	aMG	7.71129e-08	2.6666	0.000262878	ChemicalGeneticPerturbations	SENESE_HDAC1_TARGETS_UP	548	34	SERINC3,SRRT,TGM2,HSP90AB1,ACTR2,USP16,CDK6,ADAM10,RAC2,USP32,ARHGDIA,SUPT16H,SSR3,TNFAIP3,STIP1,DOCK10,IRAK2,DOCK4,TGFBR1,CCL2,BDP1,ADAMTS6,LCP1,ITGB1,ANP32E,ITGA6,TEX261,SRGN,LRRC58,EIF4G1,EPRS,DHX9,BIRC3,BCL2A1
Cortex	24hrs	aMG	1.42139e-06	4.14704	0.000264378	Kegg	KEGG_LYSOSOME	548	14	CTSA,CTSZ,CTSC,ARSB,CTSB,DNASE2,ATP6AP1,GBA,GUSB,ASAH1,LGMN,CD63,HEXB,M6PR
Cortex	24hrs	aMG	8.05469e-08	7.31475	0.000274584	ChemicalGeneticPerturbations	FAELT_B_CLL_WITH_VH3_21_DN	548	10	NDUFC1,YWHAB,HMGN4,COX7A2,CALM1,PSMD8,PLCL2,ASAH1,TSPO,FCGR2B
Cortex	24hrs	aMG	8.05469e-08	7.31475	0.000274584	ChemicalGeneticPerturbations	WONG_PROTEASOME_GENE_MODULE	548	10	ARIH1,PSMD8,PSME1,PSMA7,PSMB6,PSMA1,PSMD14,PSMC3,PSMB4,PSMC5
Cortex	24hrs	aMG	8.2568e-08	2.57549	0.000281474	ChemicalGeneticPerturbations	SENESE_HDAC3_TARGETS_UP	548	36	SERINC3,ARL6IP1,HSPA4,HSP90AB1,ACTR2,USP16,MAML3,CDK6,ADAM10,TBC1D9,CASK,USP32,ARHGDIA,MAPK14,CTSB,RHOB,SUPT16H,TNFAIP3,STIP1,PTPRO,DOCK4,TGFBR1,CCL2,HNRNPU,BDP1,NR6A1,KLF6,BTG2,ATF3,ITGB1,TRPM4,ITGA6,EIF4G1,EPRS,DHX9,BIRC3
Cortex	24hrs	aMG	6.19679e-08	2.96133	0.000288337	GObp	GO_WNT_SIGNALING_PATHWAY	548	29	PSMB1,CSNK1A1,PFN1,DAB2,SKP1,CALM1,PSMD4,PSMD8,PSME1,PSME2,PSMA2,PSMA7,PPP1CA,UBA52,PSMD11,PSMB6,WWOX,PSMA1,PSMD14,PSMC3,PSMC1,PSMB4,PSMC5,PSMD7,PSMC4,AP2S1,UBC,PSMC2,PSMD2
Cortex	24hrs	aMG	8.6593e-08	3.63617	0.000295196	ChemicalGeneticPerturbations	KARLSSON_TGFB1_TARGETS_DN	548	21	SERINC3,CTSA,CTSZ,TGM2,HMGN2,ADAM10,DAB2,NFIA,BSG,PSME2,CTSB,TECR,NME1,TMEM176B,ARID5B,PCNA,DNAJA1,TPI1,BBX,GLUL,ZBTB20
Cortex	24hrs	aMG	9.90578e-08	3.37858	0.000337688	ChemicalGeneticPerturbations	DAZARD_RESPONSE_TO_UV_NHEK_UP	548	23	JUN,FOS,NDUFC1,HSP90AB1,JUNB,PFN1,COX7A2,PSMD8,ARHGDIA,ZFP36,TNFAIP3,JUND,GBA,RANBP1,COX7C,ATF3,TXN,MYL6,DUSP1,UQCRB,DYNLL1,SEC61G,HEXB
Cortex	24hrs	aMG	9.92895e-08	2.0341	0.000338478	ChemicalGeneticPerturbations	MARSON_BOUND_BY_FOXP3_STIMULATED	548	58	CSTB,SERF2,DENND4A,ARIH1,PDIA3,MS4A6A,JUNB,FUBP1,RBPJ,NAP1L4,ADAM10,FAM133B,NFIA,CSF1,LCORL,DAPP1,NPTN,PARK7,PSMD4,HADHA,H2AFZ,RGS2,CTSC,TMED5,OAZ1,CLIC1,TMEM167A,CPD,ARID5B,SMAD7,HNRNPU,KLF6,CHD1,MAP3K5,TXN,NOP58,SART3,SLC9A9,ARPC1B,RHEB,TMED10,TNPO1,EVI2A,HSP90B1,HCLS1,SRGN,LRRC58,DUSP6,SLFN12,SLFN12L,BIRC3,MRPS28,FCGR3A,PRDX1,PSMC2,CCND3,EID1,MLEC
Cortex	24hrs	aMG	7.88459e-08	1.89785	0.00036687	GObp	GO_CELLULAR_CATABOLIC_PROCESS	548	70	CTSA,CTSZ,LPL,ARIH1,ACAT1,USP16,HINT1,PSMB1,CSNK1A1,UBXN1,HBA2,HBA1,EIF4A1,SKP1,CALM1,USP6,USP32,PARK7,PSMD4,CSDE1,HADHA,PSMD8,PSME1,CTSC,ZFP36,PSME2,PSMA2,ARSB,CTSB,DNASE2,PSMA7,NEDD8,CCDC47,UBA52,TNFAIP3,GSPT1,SDF2L1,GBA,RPL35,PSMD11,EIF3E,PSMB6,RANBP1,PSMA1,HSPA5,PSMD14,PDE4D,PDE3B,DIS3L2,RNF19B,PSMC3,PSMC1,TPI1,PSMB4,LPIN2,RBM8A,PSMC5,GLUL,HSP90B1,EIF4G1,LGMN,PSMD7,PSMC4,AKR1A1,PRDX1,GPX1,HEX…
Cortex	24hrs	aMG	7.9091e-08	11.4044	0.00036801	GObp	GO_FORMATION_OF_TRANSLATION_PREINITIATION_COMPLEX	548	7	EIF3CL,EIF3D,EIF3J,EIF3C,EIF3E,EIF3A,DENR
Cortex	24hrs	aMG	1.09908e-07	1.92481	0.000374676	ChemicalGeneticPerturbations	MARSON_BOUND_BY_FOXP3_UNSTIMULATED	548	66	HSPA4,CSTB,H3F3B,ARIH1,NDUFC1,ACTG1,ACAT1,MS4A6A,ACTR2,LMAN2,JUNB,FUBP1,CSNK1A1,RBPJ,NFIA,NPTN,PARK7,PSMD4,HADHA,PSMD8,ACBD5,RGS2,ARL15,H2AFY,ARSB,TMED5,RHOB,SPPL2A,CCDC47,NME1,TMEM167A,CPD,ARID5B,JUND,FLI1,FOSB,SMAD7,HNRNPU,GIMAP6,KLF6,MEF2A,CDK11B,TXN,HSPA9,SART3,SLC9A9,TPM4,PSMC3,PSMC1,RHEB,TMED10,TEX261,EIF2S1,TNPO1,EVI2A,FCGR2A,HSP90B1,TRA2A,SRGN,VMP1,DUSP6,TXNIP,SURF4,PRDX1,EID1,MLEC
Cortex	24hrs	aMG	1.18319e-07	10.9085	0.000403348	ChemicalGeneticPerturbations	BARIS_THYROID_CANCER_UP	548	7	COX7A2,COX7B,STIP1,EIF2S2,COPB1,COX6A1,GLUL
Cortex	24hrs	aMG	1.18319e-07	10.9085	0.000403348	ChemicalGeneticPerturbations	MULLIGAN_NTF3_SIGNALING_VIA_INSR_AND_IGF1R_UP	548	7	HSPA4,SRSF2,NOP56,NME1,CCL2,GNL3,DDX21
Cortex	24hrs	aMG	1.21077e-07	2.19723	0.000412752	ChemicalGeneticPerturbations	ONKEN_UVEAL_MELANOMA_UP	548	48	HK2,PRKCA,PSMB1,C1QB,PFN1,MT2A,ARPC2,C1QA,TCF12,CALM1,SH3BGRL3,CALR,INPP4B,HSD17B12,SMARCA5,ANK2,HDAC1,CTSC,PSME2,CTSB,LUC7L3,RHOB,PSMA7,SUPT16H,TCEA1,GSPT1,EGR1,DOCK4,GUSB,RCAN1,CUX1,PCNA,SLC1A1,PSMD14,CDKN1A,ANP32E,ITGA6,ACTB,TNPO1,TRA2A,HCLS1,UQCRB,NDUFB8,FRMD4B,MRPS28,IER5,RBM28,TPD52
Cortex	24hrs	aMG	1.25177e-07	7.0279	0.000426728	ChemicalGeneticPerturbations	APPIERTO_RESPONSE_TO_FENRETINIDE_DN	548	10	NDUFC1,MDH2,UQCR10,H2AFZ,BANF1,LDHA,FLI1,FCGR1A,SET,NDUFA2
Cortex	24hrs	aMG	1.30741e-07	4.96824	0.000445696	ChemicalGeneticPerturbations	BASSO_CD40_SIGNALING_UP	548	14	MEF2C,JUNB,TNF,RAC2,CCL4,TNFAIP3,ICAM1,ARID5B,CD83,IL1B,CHD1,HSP90B1,SRGN,BCL2A1
Cortex	24hrs	aMG	6.63089e-07	8.96057	0.000446922	Reactome	REACTOME_PREFOLDIN_MEDIATED_TRANSFER_OF_SUBSTRATE_TO_CCT_TRIC	548	7	CCT8,CCT5,CCT3,ACTB,CCT2,TUBA1C,CCT6A
Cortex	24hrs	aMG	1.32706e-07	2.69871	0.000452393	ChemicalGeneticPerturbations	BOQUEST_STEM_CELL_CULTURED_VS_FRESH_UP	548	32	JUN,LPL,TGM2,JUNB,ADAM10,ANK2,RGS2,ZFP36,RNASE4,BST2,RHOB,TNFAIP3,EGR1,PTPRO,EIF2S2,JUND,CD83,CCL2,KLF6,BTG2,SLC1A1,ATF3,TPM4,DUSP1,SRGN,ZBTB20,CCL8,TXNIP,FRMD4B,AP2S1,IER5,TXNRD1
Cortex	24hrs	aMG	1.38941e-07	4.17342	0.00047365	ChemicalGeneticPerturbations	DARWICHE_SQUAMOUS_CELL_CARCINOMA_UP	548	17	PDCD5,YWHAB,NHP2,BZW1,NCL,H2AFZ,RHOH,LDHA,COX5B,ICAM1,ENO1,IL1B,FTL,TXN,CXCL16,DYNLL1,CACYBP
Cortex	24hrs	aMG	1.39702e-07	3.98248	0.000476244	ChemicalGeneticPerturbations	DARWICHE_PAPILLOMA_RISK_LOW_UP	548	18	PDCD5,YWHAB,NHP2,BZW1,NCL,H2AFZ,RHOH,LDHA,COX5B,GBA,ENO1,IL1B,FTL,TXN,EIF5A,LRRC58,DYNLL1,CACYBP
Cortex	24hrs	aMG	1.0855e-07	2.07508	0.000505081	GObp	GO_REGULATION_OF_PROTEIN_LOCALIZATION	548	55	LPL,PDCD5,HSP90AB1,YWHAB,PRKCA,YWHAG,DAB2,TNF,RAC2,CCT8,NPTN,PARK7,PSMD8,NCL,DYNLL2,NMT1,PYCARD,MAPK14,H2AFY,BANK1,OAZ1,PID1,CCT5,MIF,RSL1D1,TGFBR1,IL1B,ANP32B,CCL2,GNL3,UBL5,ERP29,LCP1,CCT3,RALB,TXN,ITGB1,TRPM4,CDKN1A,DNAJA1,PTPN1,ARF1,GAS6,CCT2,SLC25A4,GLUL,HCLS1,SRGN,CD14,TOMM7,IL4R,SLC25A5,DYNLL1,CCT6A,PRDX1
Cortex	24hrs	aMG	1.51912e-07	8.96057	0.000517868	ChemicalGeneticPerturbations	SCHAEFFER_PROSTATE_DEVELOPMENT_AND_CANCER_BOX4_DN	548	8	SSR1,CHD9,CSNK1A1,NFIA,MANF,CDC37L1,CANX,EIF3A
Cortex	24hrs	aMG	1.12054e-07	2.20286	0.000521387	GObp	GO_INTRACELLULAR_PROTEIN_TRANSPORT	548	48	JUN,ARL6IP1,HSPA4,CTSA,SSR1,PDIA3,YWHAB,YWHAG,TBC1D9,TNF,RAC2,TBC1D5,CALR,BSG,ANK2,SNX6,SPCS2,MYO7A,SSR2,RHOB,SSR3,UBA52,RPL35,RANBP1,NDUFA13,ERP29,RERE,RALB,ITGB1,NOP58,HSPA9,TSPO,SNX1,CDC37,TMED10,GAS6,TNPO1,COPB1,EIF5A,HSP90B1,PHB2,TOMM7,TXNIP,SURF4,DYNLL1,AP2S1,GOLGA4,SEC61G
Cortex	24hrs	aMG	1.55332e-07	2.83996	0.000529528	ChemicalGeneticPerturbations	YOSHIMURA_MAPK8_TARGETS_DN	548	29	SERINC3,NDUFC1,ACTG1,HNRNPA2B1,NFIA,MDH2,SSR4,CASK,NPTN,PSMD4,BSG,CCL4,NMT1,MAPK14,RNASE4,NME1,ALDOA,NDUFAB1,NOLC1,CCT3,PSMA1,HSPA9,SART3,TMED10,COPB1,PSMC5,VMP1,DUSP6,PSMC2
Cortex	24hrs	aMG	1.17752e-07	2.4674	0.000547899	GObp	GO_REGULATION_OF_CELLULAR_PROTEIN_LOCALIZATION	548	38	PDCD5,HSP90AB1,YWHAB,YWHAG,DAB2,TNF,RAC2,CCT8,NPTN,PARK7,PSMD8,DYNLL2,NMT1,MAPK14,H2AFY,OAZ1,PID1,CCT5,TGFBR1,IL1B,ANP32B,CCL2,GNL3,UBL5,LCP1,CCT3,RALB,TXN,ITGB1,CDKN1A,PTPN1,GAS6,CCT2,HCLS1,TOMM7,DYNLL1,CCT6A,PRDX1
Cortex	24hrs	aMG	2.95243e-06	4.4341	0.000549153	Kegg	KEGG_FC_GAMMA_R_MEDIATED_PHAGOCYTOSIS	548	12	PRKCA,CFL1,ARPC2,RAC2,FCGR1A,ARPC3,ARPC1B,INPP5D,FCGR2C,FCGR2A,FCGR2B,FCGR3A
Cortex	24hrs	aMG	1.64323e-07	2.29007	0.000560178	ChemicalGeneticPerturbations	MARTINEZ_RB1_TARGETS_UP	548	43	SERINC3,LPL,SIRPA,JUNB,HNRNPAB,C1QB,MT2A,TCF12,BZW1,ZFP36,CTSB,BACH2,TECR,TCEA1,PDAP1,CPD,NAV2,UBL5,MEF2A,CUX1,LCP1,MAP3K5,HSPA9,KRTCAP2,CDKN1A,TSPO,PGD,DUSP1,ACTB,CCT2,EIF4G1,UQCRB,PHB2,EIF3A,TXNIP,FRMD4B,TMCC3,GAPDH,GOLGA4,RASSF3,UBC,NDUFA2,NAP1L1
Cortex	24hrs	aMG	1.6946e-07	3.50088	0.000577689	ChemicalGeneticPerturbations	YAMAZAKI_TCEB3_TARGETS_DN	548	21	ARL6IP1,MT2A,SERBP1,PARK7,FKBP3,TUBB,PSMA2,CPEB1,MIF,TCEA1,RBM3,ALDOA,TALDO1,CCT3,KLF2,TUBA1B,TUBA1C,DUSP6,GOLGA4,RIMKLB,TPD52
Cortex	24hrs	aMG	1.73688e-07	7.68049	0.000592104	ChemicalGeneticPerturbations	AMIT_EGF_RESPONSE_40_HELA	548	9	JUN,JUNB,ZFP36,EGR1,KLF6,BTG2,ATF3,KLF2,DUSP1
Cortex	24hrs	aMG	1.29841e-07	2.86343	0.000604149	GObp	GO_REGULATION_OF_APOPTOTIC_SIGNALING_PATHWAY	548	29	SERINC3,PDCD5,PDIA3,YWHAB,YWHAG,TNF,PARK7,P4HB,DYNLL2,NMT1,PYCARD,CTSC,PPP1CA,TNFAIP3,MIF,ICAM1,TGFBR1,IL1B,NDUFA13,WWOX,ERP29,ATF3,PTPN1,ITGA6,RRM2B,PAK2,SLC25A5,DYNLL1,GPX1
Cortex	24hrs	aMG	1.36399e-07	1.73854	0.000634666	GObp	GO_CATABOLIC_PROCESS	548	86	CTSA,CTSZ,LPL,ARIH1,ACAT1,HK2,USP16,HINT1,PSMB1,CSNK1A1,UBXN1,HBA2,HBA1,ADAM15,EIF4A1,SKP1,CALM1,TBC1D5,USP6,USP32,PARK7,PSMD4,CSDE1,HADHA,PSMD8,PSME1,SDC4,ACBD5,CTSC,ZFP36,PSME2,PSMA2,ARSB,CTSB,DNASE2,SNRPD1,PSMA7,NEDD8,LDHA,CCDC47,UBA52,TNFAIP3,GSPT1,SDF2L1,ALDOA,GBA,GUSB,ENO1,RPL35,PSMD11,EIF3E,PSMB6,RANBP1,MBD5,PSMA1,HSPA5,PSMD14,PDE4D,PDE3B,DIS3L2,RNF19B,CDC37,PSMC3,PSMC1,TPI1,PSMB4,EIF2S1,L…
Cortex	24hrs	aMG	1.37517e-07	2.60393	0.000639868	GObp	GO_REGULATION_OF_MITOTIC_CELL_CYCLE	548	34	PRKCA,PSMB1,SKP1,PSMD4,PSMD8,PSME1,ZNF207,PSME2,PSMA2,H2AFY,PID1,PSMA7,UBA52,IL1B,PSMD11,PSMB6,RANBP1,PCNA,BTG2,PSMA1,FOXN3,PSMD14,CDKN1A,PSMC3,PSMC1,PSMB4,DUSP1,PSMC5,PHB2,PSMD7,PSMC4,UBC,PSMC2,PSMD2
Cortex	24hrs	aMG	1.89747e-07	4.08939	0.000646848	ChemicalGeneticPerturbations	HUANG_GATA2_TARGETS_UP	548	17	TNFAIP8L2,SH3BGRL3,H2AFY,PSENEN,TGFBR1,LAT2,UBL5,SELPLG,CDKN1A,TSPO,EVI2A,COX6A1,FCGR2A,FCGR2B,SRGN,TXNIP,GPX1
Cortex	24hrs	aMG	1.35203e-05	3.04659	0.000676016	Hallmark	HALLMARK_INTERFERON_GAMMA_RESPONSE	548	17	MT2A,CSF2RB,PSME1,PSME2,PSMA2,BST2,BANK1,SPPL2A,TNFAIP3,ICAM1,ARID5B,CCL2,FCGR1A,CDKN1A,PTPN1,IL4R,TXNIP
Cortex	24hrs	aMG	2.00107e-07	3.35545	0.000682164	ChemicalGeneticPerturbations	RUTELLA_RESPONSE_TO_HGF_DN	548	22	LY86,TMX4,MS4A6A,MEF2C,DAPP1,HADHA,CD52,PLCL2,RGS2,ZFP36,RNASE4,PID1,EGR1,FCHSD2,CD83,RERE,CDKN1A,GAS6,CD14,DUSP6,C5AR1,IER5
Cortex	24hrs	aMG	1.54101e-07	3.95804	0.000717031	GObp	GO_CELLULAR_RESPONSE_TO_BIOTIC_STIMULUS	548	18	MEF2C,TNF,NCL,PYCARD,MAPK14,CPEB1,CCDC47,TNFAIP3,ICAM1,IRAK2,IL1B,CCL2,HSPA5,PDE4D,TSPO,CXCL16,CD14,TXNIP
Cortex	24hrs	aMG	2.13119e-07	3.06869	0.000726521	ChemicalGeneticPerturbations	HELLER_HDAC_TARGETS_DN	548	25	PDIA3,HNRNPAB,NOP14,CALR,CD52,NOP56,RHOH,CTSC,DOCK10,GBA,FLI1,EIF4G2,CRELD2,ATF3,HSPA5,HSPA9,SELPLG,PDE4D,EIF5A,INPP5D,PDIA4,HSPE1,SET,DUSP6,SLA
Cortex	24hrs	aMG	4.22703e-06	7.16846	0.000786228	Kegg	KEGG_PRION_DISEASES	548	7	C1QC,C1QB,C1QA,STIP1,EGR1,IL1B,HSPA5
Cortex	24hrs	aMG	2.3191e-07	4.48029	0.00079058	ChemicalGeneticPerturbations	ZHU_CMV_ALL_UP	548	15	SSR1,EIF4A1,PSMA2,TNFAIP3,STIP1,EGR1,ENO1,MANF,RANBP1,DNAJA1,PSMC1,EIF5A,HSPE1,LGMN,PSMD2
Cortex	24hrs	aMG	1.18212e-06	3.22904	0.000796749	Reactome	REACTOME_TRANSLATION	548	20	SSR1,EEF1A1,EIF3D,EIF4A1,SSR4,EIF3J,SPCS2,EIF3C,SSR2,EIF5B,SSR3,UBA52,EIF2S2,RPL35,EIF3E,EEF1G,EIF2S1,EIF4G1,EIF3A,SEC61G
Cortex	24hrs	aMG	1.80188e-07	1.78639	0.000838416	GObp	GO_CELLULAR_RESPONSE_TO_STRESS	548	78	JUN,FOS,SSR1,TMX4,PDIA3,MEF2C,HK2,USP16,TMX3,HMGN1,RBPJ,TNF,SKP1,SLC8A1,ROMO1,TBC1D5,PARK7,CALR,P4HB,SMARCA5,PYCARD,CTLA4,MAPK14,RHOB,SNRPD1,CPEB1,PPP1CA,CCDC47,SUPT16H,UBA52,TNFAIP3,MIF,TCEA1,EGR1,ICAM1,SDF2L1,IRAK2,GBA,CCL2,MORF4L1,MBD5,KLF6,PCNA,MAP3K5,BTG2,RALB,ATF3,HSPA5,FOXN3,PDIA6,PSMD14,CDKN1A,DNAJA1,PTPN1,TSPO,CDC37,PSMC3,PSMC1,KLF2,GAS6,RRM2B,EIF2S1,RCSD1,PSMC5,GLUL,PDIA4,HSP90B1,TOMM7,…
Cortex	24hrs	aMG	2.50624e-07	4.73389	0.000854378	ChemicalGeneticPerturbations	KEEN_RESPONSE_TO_ROSIGLITAZONE_DN	548	14	C1QB,RGS2,IL1B,MEF2A,LCP1,ATF3,TXN,TPM4,DUSP1,ACTB,SRGN,CD14,SLFN12L,DYNLL1
Cortex	24hrs	aMG	1.88332e-07	16.292	0.00087631	GObp	GO_PROTEIN_FOLDING_IN_ENDOPLASMIC_RETICULUM	548	5	PDIA3,CALR,HSPA5,CANX,HSP90B1
Cortex	24hrs	aMG	1.89132e-07	1.75362	0.00088003	GObp	GO_ESTABLISHMENT_OF_LOCALIZATION_IN_CELL	548	82	JUN,ARL6IP1,HSPA4,CTSA,CTSZ,SSR1,PDIA3,YWHAB,ACTR2,HK2,YWHAG,LMAN2,HNRNPA2B1,TBC1D9,TNF,RAC2,SRSF2,SLC8A1,CASK,TBC1D5,PARK7,CALR,BSG,ANK2,DYNLL2,SNX6,NMT1,SPCS2,CTSC,MYO7A,TUBB,BANF1,SSR2,ARSB,RHOB,SNRPD1,TMED3,SSR3,UBA52,COPE,RPL35,RANBP1,LAT2,NDUFA13,ERP29,CUX1,RERE,RALB,ITGB1,NOP58,HSPA9,CANX,TSPO,ARF1,SNRPD3,SNX1,CDC37,NAAA,TMED10,GAS6,TEX261,TNPO1,COPB1,EIF5A,RBM8A,HSP90B1,PHB2,TOMM7,TUBA1B,…
Cortex	24hrs	aMG	2.64297e-07	5.4444	0.00090099	ChemicalGeneticPerturbations	MALONEY_RESPONSE_TO_17AAG_DN	548	12	PDCD5,HNRNPA2B1,HNRNPAB,EIF4A1,SRSF2,SSB,PSMA7,LDHA,PA2G4,RPL35,TPI1,DYNLL1
Cortex	24hrs	aMG	2.33238e-07	6.63746	0.00108526	GObp	GO_MONOSACCHARIDE_BIOSYNTHETIC_PROCESS	548	10	MDH2,ALDOA,ENO1,TALDO1,ATF3,TKT,PGD,TPI1,GAPDH,AKR1A1
Cortex	24hrs	aMG	3.2854e-07	3.62236	0.00111999	ChemicalGeneticPerturbations	BOYAULT_LIVER_CANCER_SUBCLASS_G3_UP	548	19	CSDE1,CCT5,FAM50A,NME1,CLIC1,ENO1,PSMD11,GNL3,TXN,PSMD14,ANP32E,PGD,EIF2S1,CCT2,NARS,PSMC4,SEC61G,RBM28,TPD52
Cortex	24hrs	aMG	1.74704e-06	6.08643	0.0011775	Reactome	REACTOME_PROTEIN_FOLDING	548	9	CCT8,NOP56,CCT5,CCT3,ACTB,CCT2,TUBA1B,TUBA1C,CCT6A
Cortex	24hrs	aMG	3.57241e-07	5.30997	0.00121783	ChemicalGeneticPerturbations	SAKAI_TUMOR_INFILTRATING_MONOCYTES_DN	548	12	ARIH1,HNRNPA2B1,CCT8,FKBP3,FCGR1A,PCNA,TXN,HSPA5,DNAJA1,RBM8A,CD63,PRDX1
Cortex	24hrs	aMG	2.46376e-05	3.90362	0.00123188	Hallmark	HALLMARK_ANDROGEN_RESPONSE	548	11	CDK6,INPP4B,MERTK,ADAMTS1,PA2G4,MYL12A,ARID5B,HPGD,MAK,TPD52,CCND3
Cortex	24hrs	aMG	2.72603e-07	2.27398	0.00126842	GObp	GO_INTERSPECIES_INTERACTION_BETWEEN_ORGANISMS	548	42	CD81,JUN,HSP90AB1,YWHAB,PSMB1,EIF3D,CFL1,EIF4A1,NFIA,C1QBP,CCL4,HDAC1,SSB,BANF1,CTSB,PSMA7,UBA52,ICAM1,RPL35,CCL2,PSMB6,RANBP1,CHD1,MAP3K5,ITGB1,SELPLG,PSMC3,PSMB4,GAS6,TNPO1,COPB1,SLC25A4,FCGR2B,EIF4G1,SET,EIF3A,PAK2,SLC25A5,DYNLL1,GPX1,UBC,PSMC2
Cortex	24hrs	aMG	2.72603e-07	2.27398	0.00126842	GObp	GO_SYMBIOSIS_ENCOMPASSING_MUTUALISM_THROUGH_PARASITISM	548	42	CD81,JUN,HSP90AB1,YWHAB,PSMB1,EIF3D,CFL1,EIF4A1,NFIA,C1QBP,CCL4,HDAC1,SSB,BANF1,CTSB,PSMA7,UBA52,ICAM1,RPL35,CCL2,PSMB6,RANBP1,CHD1,MAP3K5,ITGB1,SELPLG,PSMC3,PSMB4,GAS6,TNPO1,COPB1,SLC25A4,FCGR2B,EIF4G1,SET,EIF3A,PAK2,SLC25A5,DYNLL1,GPX1,UBC,PSMC2
Cortex	24hrs	aMG	2.8411e-07	4.68965	0.00132196	GObp	GO_HYDROGEN_ION_TRANSMEMBRANE_TRANSPORT	548	14	COX7A2,UQCR10,COX7B,COX6B1,COX5B,ATP6AP1,COX7C,UQCRQ,COX4I1,SLC9A9,UQCR11,COX6A1,UQCRB,NDUFA4
Cortex	24hrs	aMG	2.92975e-07	5.88456	0.00136321	GObp	GO_CELL_REDOX_HOMEOSTASIS	548	11	TMX4,PDIA3,TMX3,SH3BGRL3,P4HB,NCF4,TXN,PDIA6,PDIA4,GPX1,TXNRD1
Cortex	24hrs	aMG	3.07995e-07	2.37698	0.0014331	GObp	GO_POSITIVE_REGULATION_OF_ORGANELLE_ORGANIZATION	548	38	PDCD5,YWHAB,ACTR2,YWHAG,PFN1,ARPC2,TNF,RAC2,CCT8,C1QBP,PARK7,PSMD8,DYNLL2,NMT1,SDC4,RGS2,PYCARD,H2AFY,CCT5,ICAM1,IL1B,RANBP1,GNL3,UBL5,LCP1,CCT3,RALB,ARPC3,SART3,DHX36,ARPC1B,CCT2,HCLS1,PHB2,TOMM7,SURF4,DYNLL1,CCT6A
Cortex	24hrs	aMG	3.15034e-07	2.6455	0.00146585	GObp	GO_POSITIVE_REGULATION_OF_LOCOMOTION	548	31	JUN,RREB1,PRKCA,PFN1,ADAM10,DAB2,TNF,RAC2,CSF1,SLC8A1,C1QBP,CALR,P4HB,CCL4,PYCARD,MAPK14,RHOB,CPEB1,ICAM1,DOCK4,TGFBR1,IL1B,CCL2,ITGB1,HSPA5,SEMA5B,GAS6,CXCL16,CCL8,CLASP2,C5AR1
Cortex	24hrs	aMG	3.19427e-07	1.88035	0.00148629	GObp	GO_VESICLE_MEDIATED_TRANSPORT	548	65	CD81,FCGR1B,MSR1,CTSZ,TGM2,ACTG1,HSP90AB1,ACTR2,LMAN2,TMX3,CSNK1A1,HBA2,HBA1,DAB2,ARPC2,CALM1,TBC1D5,CALR,MERTK,ANK2,NCL,DYNLL2,SNX6,PYCARD,CTSC,MYO7A,SDF4,TMED3,NME1,COPE,ALDOA,ELMO1,LAT2,FCGR1A,STAB1,CDC37L1,CUX1,ITGB1,PDIA6,ARPC3,CANX,ARF1,SNX1,ARPC1B,TMED10,GAS6,TEX261,ACTB,CXCL16,COPB1,FCGR2A,HSP90B1,SRGN,CD14,VMP1,EXOC6,CCL8,CLASP2,SURF4,DYNLL1,FCGR3A,CD63,AP2S1,GOLGA4,M6PR
Cortex	24hrs	aMG	4.61564e-07	7.96495	0.00157347	ChemicalGeneticPerturbations	HOUSTIS_ROS	548	8	MT2A,SDC4,FTL,TXN,TXNIP,PRDX1,GPX1,TXNRD1
Cortex	24hrs	aMG	3.63465e-07	4.6036	0.0016912	GObp	GO_POSITIVE_REGULATION_OF_LEUKOCYTE_MIGRATION	548	14	ADAM10,TNF,RAC2,CSF1,C1QBP,CALR,CCL4,PYCARD,ICAM1,IL1B,CCL2,GAS6,CCL8,C5AR1
Cortex	24hrs	aMG	3.63465e-07	4.6036	0.0016912	GObp	GO_RESPONSE_TO_HYDROGEN_PEROXIDE	548	14	JUN,HBA2,HBA1,SLC8A1,PARK7,RHOB,LDHA,TNFAIP3,KLF6,MAP3K5,KLF2,DUSP1,TXNIP,GPX1
Cortex	24hrs	aMG	5.21967e-07	4.01033	0.00177939	ChemicalGeneticPerturbations	BASSO_B_LYMPHOCYTE_NETWORK	548	16	HNRNPAB,SERBP1,NME1,MYL12A,NDUFAB1,PCNA,HSPA9,PSMD14,NISCH,EIF2S1,SLC25A4,SRGN,HSPE1,EIF4G1,ZBTB20,PSMD2
Cortex	24hrs	aMG	3.91509e-07	2.15241	0.00182169	GObp	GO_MITOTIC_CELL_CYCLE	548	46	PRKCA,USP16,YWHAG,PSMB1,CSNK1A1,CDK6,SKP1,CALM1,PSMD4,PSMD8,PSME1,ZNF207,TUBB,PSME2,BANF1,PSMA2,PSMA7,UBA52,GSPT1,PSMD11,NOLC1,PSMB6,RANBP1,PCNA,BTG2,CDK11B,PSMA1,ITGB1,FOXN3,PSMD14,CDKN1A,DIS3L2,PSMC3,PSMC1,PSMB4,PSMC5,CLASP2,PSMD7,PAK2,BIRC3,DYNLL1,CDK11A,PSMC4,UBC,PSMC2,PSMD2
Cortex	24hrs	aMG	4.4955e-07	2.44062	0.00209176	GObp	GO_POSITIVE_REGULATION_OF_ESTABLISHMENT_OF_PROTEIN_LOCALIZATION	548	35	LPL,PDCD5,HSP90AB1,YWHAB,YWHAG,DAB2,TNF,RAC2,CCT8,PSMD8,NCL,DYNLL2,NMT1,PYCARD,MAPK14,OAZ1,CCT5,MIF,TGFBR1,IL1B,ANP32B,CCL2,UBL5,ITGB1,TRPM4,ARF1,GAS6,CCT2,GLUL,HCLS1,CD14,TOMM7,IL4R,DYNLL1,CCT6A
Cortex	24hrs	aMG	6.35015e-07	5.06009	0.00216477	ChemicalGeneticPerturbations	SANA_RESPONSE_TO_IFNG_DN	548	12	HSP90AB1,DAB2,UQCR10,H2AFZ,SSR2,CCT5,NME1,PA2G4,EIF4G2,CCT3,NDUFA4,PRDX1
Cortex	24hrs	aMG	6.64212e-07	6.72043	0.0022643	ChemicalGeneticPerturbations	GNATENKO_PLATELET_SIGNATURE	548	9	CFL1,OAZ1,MYL12A,MYL6,ACTB,DYNLL1,GAPDH,GPX1,UBC
Cortex	24hrs	aMG	6.66887e-07	13.7855	0.00227342	ChemicalGeneticPerturbations	FU_INTERACT_WITH_ALKBH8	548	5	CCT8,CCT5,CCT3,CCT2,CCT6A
Cortex	24hrs	aMG	4.68025e-05	3.11672	0.00234012	Hallmark	HALLMARK_APOPTOSIS	548	14	JUN,TNF,RHOB,IL1B,SMAD7,BTG2,ATF3,CDKN1A,DNAJA1,TSPO,CD14,TXNIP,BIRC3,GPX1
Cortex	24hrs	aMG	7.02414e-07	3.92792	0.00239453	ChemicalGeneticPerturbations	PECE_MAMMARY_STEM_CELL_UP	548	16	CSTB,ACTG1,HINT1,MT2A,COX7A2,UBA52,TALDO1,UBL5,TXN,COX4I1,UQCR11,UQCRB,IL4R,DYNLL1,GAPDH,SEC61G
Cortex	24hrs	aMG	4.83955e-05	2.86738	0.00241978	Hallmark	HALLMARK_ADIPOGENESIS	548	16	LPL,RREB1,YWHAG,MDH2,UQCR10,COX7B,NMT1,ALDOA,ATP1B3,TALDO1,NDUFAB1,UQCRQ,TKT,UQCR11,COX6A1,UBC
Cortex	24hrs	aMG	7.26976e-07	1.79863	0.00247826	ChemicalGeneticPerturbations	DODD_NASOPHARYNGEAL_CARCINOMA_DN	548	69	FCGR1B,MSR1,PDCD5,YWHAG,HNRNPA2B1,FUBP1,RBPJ,HNRNPAB,C1QB,TAF1D,SRSF2,CCT8,TCF12,CASK,C1QBP,MED28,EIF3J,NCL,CCL4,H2AFZ,NOP56,CTSC,ZNF207,TUBB,GTPBP4,PSMA2,LUC7L3,SNRPD1,PSMA7,MED21,LDHA,NME1,PA2G4,ICAM1,TMEM167A,EIF2S2,DOCK4,RSL1D1,ENO1,CNTNAP2,NOLC1,CCL2,HNRNPU,RANBP1,CCT3,PCNA,PSMA1,NUCKS1,NOP58,PSMD14,RHEB,TPI1,TNPO1,CCT2,FCGR2A,HSPE1,CD14,DDX21,EPRS,CCL8,CCT6A,FCGR3B,GAPDH,COL27A1,DENR,CACYBP…
Cortex	24hrs	aMG	5.49455e-07	2.16927	0.00255661	GObp	GO_CELLULAR_MACROMOLECULAR_COMPLEX_ASSEMBLY	548	44	HSPA4,H3F3B,NDUFC1,EIF3CL,EIF3D,NAP1L4,UQCR10,C1QBP,CALR,PSMD4,PSMD8,EIF3J,SMARCA5,LUC7L,EIF3C,ZNF207,H2AFY,LUC7L3,SNRPD1,NDUFV3,NDUFB10,UBA52,PSMD11,NDUFAB1,ANP32B,EIF3E,NDUFA13,SART3,NDUFC2,SNRPD3,TMED10,TNPO1,CCT2,HCLS1,UQCRB,CLASP2,SET,EIF3A,NDUFB8,DENR,AP2S1,UBC,NDUFA2,NAP1L1
Cortex	24hrs	aMG	7.74091e-07	3.9012	0.00263888	ChemicalGeneticPerturbations	DARWICHE_PAPILLOMA_RISK_HIGH_UP	548	16	PDCD5,NHP2,BZW1,NCL,H2AFZ,RHOH,LDHA,COX5B,ICAM1,ENO1,IL1B,FTL,TXN,CXCL16,DYNLL1,CACYBP
Cortex	24hrs	aMG	3.96821e-06	2.82627	0.00267457	Reactome	REACTOME_INNATE_IMMUNE_SYSTEM	548	22	JUN,LY86,FOS,HSP90AB1,MEF2C,C1QC,C1QB,C1QA,PYCARD,MAPK14,CTSB,UBA52,TNFAIP3,IRAK2,MEF2A,TXN,HSP90B1,CD14,LGMN,DUSP6,TXNIP,BIRC3
Cortex	24hrs	aMG	7.92649e-07	3.56443	0.00270214	ChemicalGeneticPerturbations	JISON_SICKLE_CELL_DISEASE_UP	548	18	CTSA,GNG5,CALR,P4HB,PSME2,BST2,CLIC1,PTPRO,TALDO1,FCGR1A,ATF3,TXN,CDKN1A,RHEB,AKR1A1,PRDX1,GPX1,TXNRD1
Cortex	24hrs	aMG	1.27486e-05	8.96057	0.00276644	Biocarta	BIOCARTA_ACTINY_PATHWAY	548	5	ACTR2,ARPC2,PSMA7,ARPC3,ARPC1B
Cortex	24hrs	aMG	4.21318e-06	6.23344	0.00283968	Reactome	REACTOME_NUCLEOTIDE_BINDING_DOMAIN_LEUCINE_RICH_REPEAT_CONTAINING_RECEPTOR_NLR_SIGNALING_PATHWAYS	548	8	HSP90AB1,PYCARD,MAPK14,TNFAIP3,IRAK2,TXN,TXNIP,BIRC3
Cortex	24hrs	aMG	6.22452e-07	1.78834	0.00289627	GObp	GO_ESTABLISHMENT_OF_PROTEIN_LOCALIZATION	548	71	JUN,ARL6IP1,MSR1,HSPA4,CTSA,SSR1,PDIA3,YWHAB,HK2,YWHAG,LMAN2,RBPJ,DAB2,TBC1D9,TNF,RAC2,TBC1D5,CALR,BSG,ANK2,SNX6,SPCS2,RHOH,MYO7A,H2AFY,SSR2,TMED5,RHOB,TMED3,SSR3,UBA52,TNFAIP3,COPE,ATP6AP1,RPL35,RANBP1,ARL8B,NDUFA13,ERP29,RERE,RALB,ITGB1,NOP58,HSPA9,CANX,TSPO,ARF1,SNX1,CDC37,RHEB,TMED10,GAS6,BTF3,TNPO1,COPB1,EIF5A,EIF5AL1,PDIA4,HSP90B1,PHB2,TOMM7,EXOC6,CACNB2,CLASP2,TXNIP,SURF4,DYNLL1,CD63,AP2S1…
Cortex	24hrs	aMG	6.28337e-07	1.8248	0.00292365	GObp	GO_CELL_CYCLE	548	67	ERH,ACTR2,PRKCA,USP16,YWHAG,PSMB1,CSNK1A1,CDK6,SKP1,CALM1,CALR,PSMD4,PSMD8,PSME1,RGS2,PARD3B,ZNF207,MAPK14,TUBB,PSME2,BANF1,PSMA2,RHOB,PSMA7,PPP1CA,PA2G4,UBA52,GSPT1,TGFBR1,PSMD11,NOLC1,PSMB6,RANBP1,ARL8B,EIF4G2,PCNA,BTG2,CDK11B,PSMA1,RALB,ITGB1,FOXN3,PSMD14,CDKN1A,DIS3L2,PSMC3,PSMC1,RHEB,PSMB4,GAS6,DUSP1,PSMC5,PHB2,CLASP2,PSMD7,TXNIP,PAK2,BIRC3,DYNLL1,CDK11A,PSMC4,ZFHX3,UBC,PSMC2,CCND3,EID1,PSMD2
Cortex	24hrs	aMG	8.60661e-07	2.9259	0.00293399	ChemicalGeneticPerturbations	WEST_ADRENOCORTICAL_TUMOR_UP	548	24	GNG5,ACTR2,SNX6,H2AFZ,HDAC1,OAZ1,TNFAIP3,COPE,EIF2S2,ENO1,PSMD11,UBL5,ERP29,TXN,ARPC3,PSMD14,SART3,TNPO1,TUBA1B,EPRS,TUBA1C,CCT6A,GAPDH,PSMC2
Cortex	24hrs	aMG	8.77219e-07	3.69284	0.00299044	ChemicalGeneticPerturbations	BLALOCK_ALZHEIMERS_DISEASE_INCIPIENT_DN	548	17	DENND4A,HSP90AB1,SERBP1,USP6,ZNF207,CCT5,NEDD8,MEF2A,CCT3,COX7C,HSPA5,PDIA6,DNAJA1,CCT2,GLUL,CACYBP,PSMC2
Cortex	24hrs	aMG	6.50692e-07	1.92308	0.00302767	GObp	GO_CELL_CYCLE_PROCESS	548	58	ACTR2,PRKCA,USP16,YWHAG,PSMB1,CSNK1A1,CDK6,SKP1,CALM1,CALR,PSMD4,PSMD8,PSME1,ZNF207,MAPK14,TUBB,PSME2,BANF1,PSMA2,RHOB,PSMA7,PA2G4,UBA52,GSPT1,TGFBR1,PSMD11,NOLC1,PSMB6,RANBP1,EIF4G2,PCNA,BTG2,CDK11B,PSMA1,RALB,ITGB1,FOXN3,PSMD14,CDKN1A,DIS3L2,PSMC3,PSMC1,RHEB,PSMB4,GAS6,DUSP1,PSMC5,PHB2,CLASP2,PSMD7,BIRC3,DYNLL1,CDK11A,PSMC4,ZFHX3,UBC,PSMC2,PSMD2
Cortex	24hrs	aMG	6.56317e-07	4.40169	0.00305384	GObp	GO_POSITIVE_REGULATION_OF_ENDOCYTOSIS	548	14	LMAN2,DAB2,TNF,TBC1D5,CALR,MERTK,PYCARD,IL1B,CCL2,ITGB1,ARF1,GAS6,CD14,CD63
Cortex	24hrs	aMG	8.97724e-07	5.32791	0.00306034	ChemicalGeneticPerturbations	MILI_PSEUDOPODIA_CHEMOTAXIS_UP	548	11	NCL,SSB,CYB5R3,PDAP1,EIF2S2,ANP32B,EIF3E,EIF3A,GOLGA4,RASSF3,NAP1L1
Cortex	24hrs	aMG	6.66887e-07	13.7855	0.00310303	GObp	GO_REGULATION_OF_RNA_POLYMERASE_II_TRANSCRIPTIONAL_PREINITIATION_COMPLEX_ASSEMBLY	548	5	PSMC3,PSMC1,PSMC5,PSMC4,PSMC2
Cortex	24hrs	aMG	6.95992e-07	2.4693	0.00323845	GObp	GO_RESPONSE_TO_INORGANIC_SUBSTANCE	548	33	JUN,FOS,MEF2C,JUNB,HBA2,HBA1,MT2A,C1QA,SLC8A1,CALM1,PARK7,CALR,BSG,RHOB,LDHA,TNFAIP3,ICAM1,JUND,IL1B,FOSB,KLF6,MEF2A,PCNA,MAP3K5,HSPA5,TSPO,KLF2,EIF2S1,DUSP1,CD14,TXNIP,PRDX1,GPX1
Cortex	24hrs	aMG	9.56116e-07	4.88759	0.0032594	ChemicalGeneticPerturbations	HUMMERICH_SKIN_CANCER_PROGRESSION_UP	548	12	FOS,JUNB,MT2A,RGS2,PYCARD,MIF,ENO1,RCAN1,ITGB1,HSPA5,CDKN1A,IL4R
Cortex	24hrs	aMG	7.02414e-07	3.92792	0.00326833	GObp	GO_TRANSLATIONAL_INITIATION	548	16	EIF3CL,EIF3D,EIF4A1,EIF3J,EIF3C,SSB,EIF5B,UBA52,EIF2S2,RPL35,EIF3E,EIF4G2,EIF2S1,EIF4G1,EIF3A,DENR
Cortex	24hrs	aMG	7.32553e-07	3.73815	0.00340857	GObp	GO_RESPONSE_TO_TOPOLOGICALLY_INCORRECT_PROTEIN	548	17	HSPA4,SSR1,HSP90AB1,CALR,SDF2L1,MANF,CCL2,ATF3,HSPA5,PDIA6,DNAJA1,PTPN1,EIF2S1,HSP90B1,HSPE1,DNAJB11,SEC61G
Cortex	24hrs	aMG	1.02822e-06	4.25248	0.0035052	ChemicalGeneticPerturbations	DAIRKEE_CANCER_PRONE_RESPONSE_BPA_E2	548	14	H3F3B,HMGN2,EIF4A1,SUPT16H,GATM,ANP32B,EIF4G2,TXN,TKT,EIF2S1,EIF4G1,EPRS,EIF3A,GAPDH
Cortex	24hrs	aMG	1.03669e-06	4.52378	0.00353408	ChemicalGeneticPerturbations	CHEN_LVAD_SUPPORT_OF_FAILING_HEART_UP	548	13	JUN,MT2A,ZFP36,CDC37L1,BTG2,RERE,ATF3,CDKN1A,KLF2,GLUL,ZBTB20,TXNIP,IER5
Cortex	24hrs	aMG	7.61919e-07	2.32253	0.00354521	GObp	GO_PEPTIDE_METABOLIC_PROCESS	548	37	CTSZ,EEF1A1,EIF3CL,EIF3D,EIF4A1,MRPL33,EIF3J,SPCS2,EIF3C,SSB,EIF5B,CPEB1,SPPL2A,UBA52,CLIC1,GSPT1,CPD,EIF2S2,RPL35,EIF3E,CNDP2,MRPL52,EIF4G2,EEF1G,GAS6,EIF2S1,EIF5A,EIF5AL1,SLC25A4,EIF4G1,EPRS,NARS,EIF3A,SLC25A5,MRPS28,DENR,GPX1
Cortex	24hrs	aMG	1.04885e-06	10.2407	0.00357552	ChemicalGeneticPerturbations	RAHMAN_TP53_TARGETS_PHOSPHORYLATED	548	6	PARK7,NME1,PSMB6,PDIA6,ACTB,CCT6A
Cortex	24hrs	aMG	5.36124e-06	3.94873	0.00361348	Reactome	REACTOME_TOLL_RECEPTOR_CASCADES	548	13	JUN,LY86,FOS,MEF2C,MAPK14,CTSB,UBA52,IRAK2,MEF2A,HSP90B1,CD14,LGMN,DUSP6
Cortex	24hrs	aMG	8.17133e-07	2.02499	0.00380212	GObp	GO_ORGANOPHOSPHATE_METABOLIC_PROCESS	548	50	SERINC3,LPL,NDUFC1,ERH,HK2,HINT1,MDH2,CALM1,CASK,UQCR10,COX7B,REXO2,INPP4B,HADHA,COX6B1,NDUFV3,NDUFB10,LDHA,NME1,COX5B,ALDOA,ENO1,TALDO1,NDUFAB1,NDUFA13,FHIT,COX7C,UQCRQ,TKT,PDE4D,COX4I1,PDE3B,NDUFC2-KCTD14,NDUFC2,ARF1,PGD,TPI1,RRM2B,UQCR11,LPIN2,INPP5D,COX6A1,UQCRB,NDUFB8,NDUFA4,GAPDH,AKR1A1,GPX1,HEXB,NDUFA2
Cortex	24hrs	aMG	1.77494e-05	11.0284	0.00385162	Biocarta	BIOCARTA_SALMONELLA_PATHWAY	548	4	ACTR2,ARPC2,ARPC3,ARPC1B
Cortex	24hrs	aMG	1.77494e-05	11.0284	0.00385162	Biocarta	BIOCARTA_ARENRF2_PATHWAY	548	4	JUN,FOS,PRKCA,MAPK14
Cortex	24hrs	aMG	1.13192e-06	3.79786	0.0038587	ChemicalGeneticPerturbations	FLECHNER_PBL_KIDNEY_TRANSPLANT_OK_VS_DONOR_UP	548	16	RBPJ,RGS2,PSMA2,PA2G4,GSPT1,JUND,RPL35,ANP32B,KLF6,IPCEF1,TXN,ITGB1,PSMB4,ACTB,TMCC1,DHX9
Cortex	24hrs	aMG	1.13953e-06	12.8008	0.00388464	ChemicalGeneticPerturbations	PARK_APL_PATHOGENESIS_UP	548	5	MEF2C,HINT1,PSME2,STIP1,SELPLG
Cortex	24hrs	aMG	1.17329e-06	2.87697	0.00399973	ChemicalGeneticPerturbations	MUELLER_PLURINET	548	24	HSP90AB1,FUBP1,HNRNPAB,PFN1,SRSF2,FKBP3,NCL,HDAC1,NOP56,SSB,LUC7L3,SNRPD1,NME1,PA2G4,STIP1,PSMD11,NOLC1,GNL3,PCNA,NOP58,HSPA9,HSPE1,SET,PASK
Cortex	24hrs	aMG	8.62488e-07	3.54484	0.00401316	GObp	GO_RESPONSE_TO_KETONE	548	18	FOS,JUNB,CALM1,CALR,ADAMTS1,NME1,GBA,IL1B,FOSB,CCL2,HNRNPU,KLF6,CDKN1A,TSPO,KLF2,GAS6,DUSP1,TXNIP
Cortex	24hrs	aMG	1.20363e-06	6.32511	0.00410316	ChemicalGeneticPerturbations	BURTON_ADIPOGENESIS_PEAK_AT_2HR	548	9	FOS,HK2,JUNB,RGS2,ZFP36,RHOB,FOSB,BTG2,DUSP1
Cortex	24hrs	aMG	1.20363e-06	6.32511	0.00410316	ChemicalGeneticPerturbations	CHAUHAN_RESPONSE_TO_METHOXYESTRADIOL_UP	548	9	HMGN2,SRSF2,SERBP1,COX7B,NME1,RBM3,DNAJA1,SNRPD3,EIF5AL1
Cortex	24hrs	aMG	1.23505e-06	2.48571	0.00421027	ChemicalGeneticPerturbations	MOOTHA_MITOCHONDRIA	548	31	NDUFC1,ACAT1,MDH2,COX7A2,COX7B,MRPL33,C1QBP,HADHA,COX6B1,DNASE2,COX5B,CYB5R3,GATM,NDUFAB1,SLC1A1,COX7C,HSPA9,COX4I1,TSPO,NDUFC2,UQCR11,SLC25A4,COX6A1,HSPE1,UQCRB,NDUFB8,SLC25A5,NDUFA4,MRPS28,BCL2A1,NDUFA2
Cortex	24hrs	aMG	9.2749e-07	1.82439	0.00431561	GObp	GO_REGULATION_OF_CELLULAR_LOCALIZATION	548	65	LPL,PDCD5,HSP90AB1,YWHAB,MEF2C,PRKCA,YWHAG,DAB2,TNF,RAC2,CCT8,SLC8A1,CALM1,NPTN,PARK7,PSMD8,ANK2,NCL,DYNLL2,SNX6,NMT1,SDC4,PYCARD,MAPK14,BST2,H2AFY,BANK1,OAZ1,PID1,CCT5,MIF,ATP6AP1,TGFBR1,IL1B,ANP32B,CCL2,GNL3,UBL5,ERP29,LCP1,CCT3,RALB,TXN,ITGB1,TRPM4,PDE4D,CDKN1A,PTPN1,ARF1,GAS6,CCT2,SLC25A4,GLUL,HCLS1,SRGN,CD14,TOMM7,CLASP2,IL4R,SLC25A5,DYNLL1,PASK,CCT6A,PRDX1,P2RY12
Cortex	24hrs	aMG	6.92487e-06	7.96495	0.00466736	Reactome	REACTOME_ASSOCIATION_OF_TRIC_CCT_WITH_TARGET_PROTEINS_DURING_BIOSYNTHESIS	548	6	CCT8,NOP56,CCT5,CCT3,CCT2,CCT6A
Cortex	24hrs	aMG	1.39337e-06	5.12033	0.00475	ChemicalGeneticPerturbations	THEILGAARD_NEUTROPHIL_AT_SKIN_WOUND_UP	548	11	EEF1A1,EIF4A1,TNF,ZFP36,TGFBR1,IL1B,CCL2,CHD1,LGMN,BCL2A1,M6PR
Cortex	24hrs	aMG	1.40794e-06	5.60036	0.00479968	ChemicalGeneticPerturbations	GERHOLD_ADIPOGENESIS_DN	548	10	CD81,EIF3C,TUBB,CCT5,CCL2,ITGB1,CDC37,GAS6,CCT2,IL4R
Cortex	24hrs	aMG	1.4118e-06	3.30584	0.00481283	ChemicalGeneticPerturbations	RAMALHO_STEMNESS_UP	548	19	HSPA4,ARIH1,YWHAB,EIF3J,NOP56,MPHOSPH10,RSL1D1,PSMD11,NDUFAB1,EIF4G2,CHD1,ITGB1,NOP58,CDKN1A,ITGA6,TNPO1,LRRC58,EPRS,TXNRD1
Cortex	24hrs	aMG	1.43635e-06	2.32311	0.00489653	ChemicalGeneticPerturbations	ACEVEDO_LIVER_CANCER_DN	548	35	CD81,ARL6IP1,FOS,H3F3B,ACAT1,SIRPA,HBA1,NAP1L4,MT2A,SERBP1,CALM1,NOP14,AGMO,HADHA,DYNLL2,NMT1,SDC4,ZFP36,PSMA2,CTSB,LDHA,EGR1,GATM,JUND,ENO1,FOSB,STAB1,HSPA5,COX4I1,DNAJA1,PSMC1,KLF2,CXCL16,EIF5A,NDUFB8
Cortex	24hrs	aMG	2.32545e-05	6.72043	0.00504622	Biocarta	BIOCARTA_RHO_PATHWAY	548	6	ACTR2,PFN1,CFL1,ARPC2,ARPC3,ARPC1B
Cortex	24hrs	aMG	1.08797e-06	1.66801	0.00506234	GObp	GO_POSITIVE_REGULATION_OF_BIOSYNTHETIC_PROCESS	548	84	CD81,JUN,FOS,RREB1,HSP90AB1,MEF2C,PRKCA,USP16,JUNB,MAML3,HMGN1,RBPJ,HNRNPAB,PFN1,DAB2,TNF,NFIA,CCT8,CREB5,TCF12,GTF2F1,CALM1,CASK,C1QBP,PARK7,CALR,SMARCA5,NCL,H2AFZ,HDAC1,PYCARD,MAPK14,PID1,CPEB1,CCT5,MED21,SUPT16H,UBA52,RBM3,EGR1,ICAM1,IRAK2,ARID5B,JUND,TGFBR1,IL1B,FLI1,FOSB,CCL2,SMAD7,GNL3,NR6A1,KLF6,WWOX,CHD1,MEF2A,CCT3,PCNA,RERE,ATF3,NUCKS1,HSPA5,DHX36,PSMC3,PSMC1,KLF2,ITGA6,LPIN2,CCT2,EIF5A,…
Cortex	24hrs	aMG	1.16416e-06	2.31241	0.00541682	GObp	GO_REGULATION_OF_CELL_CYCLE_PROCESS	548	36	PSMB1,SKP1,CALM1,CALR,PSMD4,PSMD8,PSME1,ZNF207,PSME2,PSMA2,H2AFY,PID1,PSMA7,UBA52,MIF,IL1B,PSMD11,PSMB6,RANBP1,PCNA,BTG2,PSMA1,FOXN3,PSMD14,CDKN1A,PSMC3,PSMC1,PSMB4,DUSP1,PSMC5,PHB2,PSMD7,PSMC4,UBC,PSMC2,PSMD2
Cortex	24hrs	aMG	8.09537e-06	2.30744	0.00545628	Reactome	REACTOME_HEMOSTASIS	548	30	H3F3B,GNG5,SIRPG,SIRPA,PRKCA,PFN1,CFL1,RAC2,SLC8A1,CALM1,ITGAM,DOCK8,C1QBP,BSG,MERTK,HDAC1,MAPK14,GNB2,RHOB,DOCK10,ALDOA,DOCK4,ATP1B3,ITGB1,HSPA5,PTPN1,PDE3B,SRGN,CD63,P2RY12
Cortex	24hrs	aMG	1.60553e-06	5.05468	0.00547325	ChemicalGeneticPerturbations	ROSS_LEUKEMIA_WITH_MLL_FUSIONS	548	11	ADAM10,DAB2,DAD1,ARPC2,RAC2,MRPL33,MAP3K5,HCLS1,CLASP2,PSMD7,HEXB
Cortex	24hrs	aMG	1.65449e-06	4.35467	0.00564015	ChemicalGeneticPerturbations	SESTO_RESPONSE_TO_UV_C0	548	13	ARL6IP1,ZFP36,BAG1,EIF4G2,PCNA,DNAJA1,CDC37,EIF2S1,CNBP,SET,DYNLL1,NDUFA4,M6PR
Cortex	24hrs	aMG	1.22558e-06	1.82987	0.0057026	GObp	GO_CELLULAR_MACROMOLECULE_LOCALIZATION	548	63	CD81,JUN,ARL6IP1,HSPA4,CTSA,SSR1,PDIA3,YWHAB,HK2,YWHAG,TBC1D9,TNF,RAC2,TBC1D5,CALR,BSG,ANK2,SNX6,SPCS2,SSB,MYO7A,H2AFY,SSR2,RHOB,SSR3,UBA52,TNFAIP3,ATP1B3,CNTNAP2,RPL35,SMAD7,RANBP1,NDUFA13,ERP29,RERE,RALB,ITGB1,NOP58,HSPA5,HSPA9,DNAJA1,TSPO,SNX1,CDC37,TMED10,GAS6,TNPO1,COPB1,EIF5A,HSP90B1,SRGN,PHB2,TOMM7,CACNB2,CLASP2,DHX9,TXNIP,SURF4,DYNLL1,CD63,AP2S1,GOLGA4,SEC61G
Cortex	24hrs	aMG	1.25037e-06	2.04689	0.00581795	GObp	GO_POSITIVE_REGULATION_OF_CELL_DIFFERENTIATION	548	47	JUN,MSR1,FOS,LPL,SRRT,RREB1,MEF2C,PRKCA,JUNB,RBPJ,SPINT1,DAB2,ARPC2,TNF,CSF1,TCF12,NPTN,C1QBP,CALR,ARHGDIA,ADAMTS1,MAPK14,H2AFY,ARSB,CPEB1,NME1,PA2G4,CLIC1,ATP6AP1,JUND,CD83,IL1B,MEF2A,CUX1,MAP3K5,ITGB1,TRPM4,TSPO,ARF1,RHEB,GAS6,INPP5D,HCLS1,EIF4G1,IL4R,ZFHX3,GOLGA4
Cortex	24hrs	aMG	2.69771e-05	10.2407	0.00585403	Biocarta	BIOCARTA_GRANULOCYTES_PATHWAY	548	4	TNF,ITGAM,ICAM1,SELPLG
Cortex	24hrs	aMG	3.31431e-05	4.07299	0.00616461	Kegg	KEGG_HEMATOPOIETIC_CELL_LINEAGE	548	10	TNF,CSF1,ITGAM,CSF3R,CD33,IL1B,FCGR1A,ITGA6,CD14,IL4R
Cortex	24hrs	aMG	1.82014e-06	4.62481	0.00620485	ChemicalGeneticPerturbations	ZHU_CMV_24_HR_UP	548	12	SSR1,EIF4A1,PSMA2,STIP1,EGR1,ENO1,MANF,RANBP1,PSMC1,EIF5A,HSPE1,PSMD2
Cortex	24hrs	aMG	1.85364e-06	2.29758	0.00631905	ChemicalGeneticPerturbations	WEST_ADRENOCORTICAL_TUMOR_DN	548	35	CD81,FOS,H3F3B,EEF1A1,OLFML3,ACTG1,SIRPA,JUNB,UBXN1,MT2A,EIF4A1,CSF1,HEPH,LUC7L,NCF4,MYO7A,ZFP36,RHOB,PID1,EGR1,ICAM1,ATP1B3,TALDO1,FOSB,CCL2,KLF6,STAB1,BTG2,TSPO,KLF2,DDX27,DUSP1,SLC25A4,TMCC1,FTSJ3
Cortex	24hrs	aMG	1.88321e-06	6.8271	0.00641986	ChemicalGeneticPerturbations	BILBAN_B_CLL_LPL_DN	548	8	FOS,MS4A6A,JUNB,EIF4A1,RGS2,CNTNAP2,DUSP1,ZBTB20
Cortex	24hrs	aMG	1.90694e-06	15.9299	0.00650077	ChemicalGeneticPerturbations	DACOSTA_LOW_DOSE_UV_RESPONSE_VIA_ERCC3_XPCS_DN	548	4	HSP90AB1,EIF4A1,ACTB,GAPDH
Cortex	24hrs	aMG	3.68802e-05	4.02722	0.00685972	Kegg	KEGG_ANTIGEN_PROCESSING_AND_PRESENTATION	548	10	HSPA4,PDIA3,HSP90AB1,CALR,PSME1,PSME2,CTSB,HSPA5,CANX,LGMN
Cortex	24hrs	aMG	1.11792e-05	11.9474	0.00753478	Reactome	REACTOME_THE_NLRP3_INFLAMMASOME	548	4	HSP90AB1,PYCARD,TXN,TXNIP
Cortex	24hrs	aMG	0.000153505	3.70782	0.00767524	Hallmark	HALLMARK_IL6_JAK_STAT3_SIGNALING	548	9	JUN,TNF,CSF1,CSF2RB,CSF3R,IL1B,PTPN1,CD14,IL4R
Cortex	24hrs	aMG	2.25605e-06	5.3496	0.00769088	ChemicalGeneticPerturbations	DAZARD_UV_RESPONSE_CLUSTER_G1	548	10	NDUFC1,HSP90AB1,COX7A2,RANBP1,COX7C,TXN,MYL6,UQCRB,DYNLL1,SEC61G
Cortex	24hrs	aMG	1.65752e-06	3.39559	0.00771242	GObp	GO_PHAGOCYTOSIS	548	18	TGM2,ACTG1,HSP90AB1,ACTR2,CSNK1A1,ARPC2,MERTK,MYO7A,ELMO1,FCGR1A,PDIA6,ARPC3,ARPC1B,GAS6,ACTB,FCGR2A,CD14,FCGR3A
Cortex	24hrs	aMG	2.30605e-06	3.78616	0.00786132	ChemicalGeneticPerturbations	DARWICHE_SKIN_TUMOR_PROMOTER_UP	548	15	PDCD5,YWHAB,NHP2,BZW1,NCL,H2AFZ,RHOH,LDHA,COX5B,ICAM1,GBA,ENO1,FTL,CXCL16,DYNLL1
Cortex	24hrs	aMG	2.30605e-06	3.78616	0.00786132	ChemicalGeneticPerturbations	GROSS_HYPOXIA_VIA_ELK3_AND_HIF1A_UP	548	15	FOS,HK2,RBPJ,MERTK,SDC4,ZFP36,EGR1,KLF6,RCAN1,ATF3,TPI1,SRGN,ZBTB20,PSMC4,NAP1L1
Cortex	24hrs	aMG	2.32328e-06	6.66833	0.00792007	ChemicalGeneticPerturbations	ZUCCHI_METASTASIS_UP	548	8	H2AFZ,CCT5,LDHA,NME1,UBA52,PTPN1,CNBP,DHX9
Cortex	24hrs	aMG	1.71129e-06	1.76486	0.00796262	GObp	GO_RESPONSE_TO_OXYGEN_CONTAINING_COMPOUND	548	68	JUN,FOS,LPL,GNG5,MEF2C,YWHAG,JUNB,HBA2,HBA1,TNF,SLC8A1,CALM1,ROMO1,PARK7,CALR,BSG,P4HB,HADHA,NCL,ADAMTS1,H2AFZ,PYCARD,MAPK14,GNB2,CTSB,RHOB,PID1,CPEB1,SDF4,LDHA,NME1,TNFAIP3,EGR1,ICAM1,ATP6AP1,IRAK2,JUND,GBA,TGFBR1,IL1B,FOSB,CCL2,HNRNPU,NDUFA13,KLF6,MAP3K5,BTG2,TXN,ITGB1,PSMD14,PDE4D,CDKN1A,PTPN1,TSPO,PDE3B,KLF2,GAS6,DUSP1,CXCL16,GLUL,HSP90B1,CD14,TXNIP,C5AR1,PRDX1,GPX1,TXNRD1,P2RY12
Cortex	24hrs	aMG	1.73525e-06	3.86787	0.00807412	GObp	GO_RESPONSE_TO_ORGANOPHOSPHORUS	548	15	JUN,FOS,JUNB,SLC8A1,BSG,LDHA,NME1,JUND,IL1B,FOSB,CCL2,PDE4D,DUSP1,HSP90B1,P2RY12
Cortex	24hrs	aMG	2.38317e-06	3.98248	0.00812422	ChemicalGeneticPerturbations	MISSIAGLIA_REGULATED_BY_METHYLATION_UP	548	14	SPINT1,SDC4,BST2,CTSB,TNFAIP3,IL1B,RCAN1,ATF3,CDKN1A,DUSP1,LGMN,DUSP6,TXNIP,BIRC3
Cortex	24hrs	aMG	2.38317e-06	3.98248	0.00812422	ChemicalGeneticPerturbations	BURTON_ADIPOGENESIS_5	548	14	RREB1,HK2,LMAN2,MDH2,ROMO1,NDUFB10,ALDOA,TALDO1,NDUFAB1,PSMA1,PDIA6,UQCR11,COX6A1,PHB2
Cortex	24hrs	aMG	0.000162889	2.68817	0.00814447	Hallmark	HALLMARK_COMPLEMENT	548	15	C1QC,USP16,PFN1,C1QA,CALM1,ITGAM,CTSC,GNB2,CTSB,TNFAIP3,DOCK10,DOCK4,HSPA5,LGMN,DUSP6
Cortex	24hrs	aMG	0.000162889	2.68817	0.00814447	Hallmark	HALLMARK_E2F_TARGETS	548	15	SRSF2,H2AFZ,NOP56,TUBB,LUC7L3,NME1,PA2G4,GSPT1,NOLC1,RANBP1,PCNA,CDKN1A,ANP32E,EIF2S1,NAP1L1
Cortex	24hrs	aMG	0.000162889	2.68817	0.00814447	Hallmark	HALLMARK_INFLAMMATORY_RESPONSE	548	15	MSR1,CSF1,CSF3R,BST2,ICAM1,IRAK2,IL1B,CCL2,KLF6,STAB1,BTG2,CDKN1A,CD14,IL4R,C5AR1
Cortex	24hrs	aMG	0.000162889	2.68817	0.00814447	Hallmark	HALLMARK_GLYCOLYSIS	548	15	HK2,MDH2,MERTK,NDUFV3,LDHA,MIF,ALDOA,GUSB,ENO1,TALDO1,TXN,HSPA5,TPI1,PSMC4,AKR1A1
Cortex	24hrs	aMG	2.49259e-06	5.8651	0.00849725	ChemicalGeneticPerturbations	TIEN_INTESTINE_PROBIOTICS_6HR_UP	548	9	EEF1A1,CALR,FTL,TXN,EEF1G,ACTB,EIF5A,GAPDH,UBC
Cortex	24hrs	aMG	2.49259e-06	5.8651	0.00849725	ChemicalGeneticPerturbations	DEMAGALHAES_AGING_UP	548	9	C1QC,HBA1,C1QB,C1QA,PSMD11,TMED10,FCGR2A,FCGR2B,TXNIP
Cortex	24hrs	aMG	2.52551e-06	2.48667	0.00860946	ChemicalGeneticPerturbations	MULLIGHAN_MLL_SIGNATURE_2_UP	548	29	FCGR1B,CTSA,SERF2,SRRT,NDUFC1,ACTR2,SIRPB1,SIRPA,ARPC2,RAC2,P4HB,PYCARD,OAZ1,SDF4,ENO1,HNRNPU,LAT2,LCP1,TRPM4,SELPLG,RNF19B,HCLS1,SRGN,CLASP2,NDUFB8,HEXB,CCND3,SLA,M6PR
Cortex	24hrs	aMG	4.02549e-05	7.46714	0.00873532	Biocarta	BIOCARTA_NTHI_PATHWAY	548	5	TNF,MAPK14,TGFBR1,IL1B,DUSP1
Cortex	24hrs	aMG	4.02549e-05	7.46714	0.00873532	Biocarta	BIOCARTA_EIF4_PATHWAY	548	5	PRKCA,EIF4A1,MAPK14,EIF4G2,EIF4G1
Cortex	24hrs	aMG	2.58953e-06	2.32834	0.00882772	ChemicalGeneticPerturbations	ENK_UV_RESPONSE_EPIDERMIS_DN	548	33	RRP1,ACAT1,HK2,ADAMTS1,ZNF207,RNASE4,GTPBP4,DNASE2,RHOB,TECR,TNFAIP3,GSPT1,EGR1,GATM,GUSB,CD83,FOSB,HPGD,SMAD7,ASAH1,RCAN1,ERP29,ATF3,FOXN3,SART3,KLF2,GAS6,DDX21,IL4R,DUSP6,TPD52,TXNRD1,GALNT2
Cortex	24hrs	aMG	2.6128e-06	2.39981	0.00890703	ChemicalGeneticPerturbations	FULCHER_INFLAMMATORY_RESPONSE_LECTIN_VS_LPS_DN	548	31	LY86,MS4A6A,HNRNPA2B1,SLC8A1,DAPP1,CALR,CSF3R,PLCL2,ACBD5,CTSC,ZNF207,ZFP36,H2AFY,DNASE2,DOCK11,EGR1,GATM,ARID5B,KLF6,STAB1,TXN,HSPA5,PDIA6,RNF19B,KLF2,GAS6,DUSP1,PDIA4,CD14,LGMN,FCGR3B
Cortex	24hrs	aMG	1.97381e-06	2.2326	0.00918416	GObp	GO_MITOCHONDRION_ORGANIZATION	548	37	JUN,HSPA4,NDUFC1,YWHAB,HK2,YWHAG,UQCR10,TBC1D5,MRPL33,PARK7,DYNLL2,NMT1,SNRPD1,PID1,NDUFV3,NDUFB10,NDUFAB1,MRPL52,NDUFA13,MBD5,MEF2A,TSPO,NDUFC2,CDC37,RRM2B,EIF2S1,SLC25A4,UQCRB,PHB2,TOMM7,NDUFB8,SLC25A5,DYNLL1,MRPS28,FCGR3B,BCL2A1,NDUFA2
Cortex	24hrs	aMG	2.84716e-06	3.27493	0.00970598	ChemicalGeneticPerturbations	MCBRYAN_PUBERTAL_BREAST_6_7WK_UP	548	18	SIRPA,MEF2C,YWHAG,SRSF2,EIF3C,MAPK14,SPPL2A,PDAP1,CPD,GUSB,TGFBR1,NDUFAB1,CUX1,DHX36,EIF4G1,ZBTB20,RASSF3,GALNT2
Cortex	24hrs	aMG	2.84716e-06	3.27493	0.00970598	ChemicalGeneticPerturbations	SHEPARD_CRUSH_AND_BURN_MUTANT_UP	548	18	JUN,HSPA4,FOS,SSR1,JUNB,ADAM10,REXO2,EGR1,MANF,MRPL52,RCAN1,BTG2,ATF3,HSPA9,KLF2,PHB2,TXNIP,FTSJ3
Cortex	24hrs	aMG	0.000196059	4.32579	0.00980295	Hallmark	HALLMARK_MYC_TARGETS_V2	548	7	HK2,NOP56,PA2G4,MPHOSPH10,NOLC1,GNL3,HSPE1
Cortex	24hrs	aMG	1.47626e-05	7.16846	0.00994999	Reactome	REACTOME_MAPK_TARGETS_NUCLEAR_EVENTS_MEDIATED_BY_MAP_KINASES	548	6	JUN,FOS,MEF2C,MAPK14,MEF2A,DUSP6
Cortex	24hrs	aMG	2.94495e-06	3.15279	0.0100393	ChemicalGeneticPerturbations	VERHAAK_GLIOBLASTOMA_MESENCHYMAL	548	19	MSR1,CTSZ,DAB2,RAC2,ITGAM,NCF4,CTSC,CTSB,TNFAIP3,CLIC1,STAB1,LCP1,ARPC1B,FCGR2A,FCGR2B,CD14,IL4R,C5AR1,HEXB
Cortex	24hrs	aMG	2.95947e-06	5.76037	0.0100888	ChemicalGeneticPerturbations	KYNG_ENVIRONMENTAL_STRESS_RESPONSE_UP	548	9	PDCD5,HNRNPA2B1,CSDE1,OAZ1,RHOB,TAF1C,ARPC1B,GOLGA4,GALNT2
Cortex	24hrs	aMG	3.07126e-06	2.95172	0.0104699	ChemicalGeneticPerturbations	DAVICIONI_TARGETS_OF_PAX_FOXO1_FUSIONS_UP	548	21	JUN,CTSA,TMX4,PRKCA,ADAM10,TBC1D9,PSMD8,ANK2,ADAMTS1,SDC4,CTSC,RHOB,TNFAIP3,GATM,ARID5B,MAP3K5,TPM4,DUSP1,IL4R,AP2S1,M6PR
Cortex	24hrs	aMG	2.29517e-06	1.95432	0.0106794	GObp	GO_RESPONSE_TO_ORGANIC_CYCLIC_COMPOUND	548	50	JUN,MSR1,FOS,SRRT,ACAT1,HSP90AB1,MEF2C,JUNB,HNRNPA2B1,TNF,SLC8A1,CALM1,CALR,BSG,ADAMTS1,H2AFZ,ARSB,CTSB,NEDD8,LDHA,NME1,EGR1,ICAM1,JUND,GBA,TGFBR1,CD83,IL1B,FOSB,CCL2,HNRNPU,NR6A1,KLF6,BTG2,RALB,ITGB1,PDE4D,CDKN1A,DHX36,DNAJA1,TSPO,KLF2,DUSP1,HSP90B1,DDX21,IL4R,DUSP6,TXNIP,PAK2,P2RY12
Cortex	24hrs	aMG	3.21891e-06	2.65892	0.0109733	ChemicalGeneticPerturbations	PHONG_TNF_RESPONSE_NOT_VIA_P38	548	25	JUN,MEF2C,RAC2,CSF1,INPP4B,SDC4,MPHOSPH10,ICAM1,ARID5B,JUND,DOCK4,CD83,MANF,NAV2,KLF6,RCAN1,CRELD2,HSPA5,RNF19B,PDIA4,HSP90B1,SRGN,BIRC3,BCL2A1,IER5
Cortex	24hrs	aMG	2.38317e-06	3.98248	0.0110889	GObp	GO_OSTEOBLAST_DIFFERENTIATION	548	14	ERH,MEF2C,JUNB,GTPBP4,CCDC47,JUND,RSL1D1,HNRNPU,WWOX,TPM4,HSPE1,DDX21,DHX9,PSMC2
Cortex	24hrs	aMG	2.52451e-06	2.44379	0.0117465	GObp	GO_RIBONUCLEOPROTEIN_COMPLEX_BIOGENESIS	548	30	RRP1,EIF3CL,EIF3D,NHP2,NOP10,NOP14,C1QBP,EIF3J,LUC7L,EIF3C,NOP56,GTPBP4,LUC7L3,SNRPD1,PA2G4,MPHOSPH10,UBA52,RPL35,NOLC1,EIF3E,GNL3,NOP58,SART3,DIS3L2,SNRPD3,DDX27,DDX21,EIF3A,DENR,FTSJ3
Cortex	24hrs	aMG	3.47402e-06	6.37196	0.0118429	ChemicalGeneticPerturbations	RASHI_RESPONSE_TO_IONIZING_RADIATION_1	548	8	JUN,FOS,ZFP36,NEDD8,EGR1,CCT3,ATF3,DUSP1
Cortex	24hrs	aMG	2.56393e-06	1.80992	0.01193	GObp	GO_PROTEOLYSIS	548	61	CTSA,CTSZ,ARIH1,PDIA3,C1QC,USP16,PSMB1,CSNK1A1,UBXN1,C1QB,ADAM15,ADAM10,TNF,SKP1,C1QA,USP6,USP32,PARK7,PSMD4,PSMD8,PSME1,ADAMTS1,SPCS2,PYCARD,CTSC,PSME2,PSMA2,CTSB,PSMA7,NEDD8,SPPL2A,CCDC47,PSENEN,UBA52,TNFAIP3,SDF2L1,CPD,PSMD11,ANP32B,CNDP2,PSMB6,RANBP1,ADAMTS6,PSMA1,HSPA5,PSMD14,RNF19B,PSMC3,PSMC1,PSMB4,GAS6,PSMC5,HSP90B1,SRGN,HSPE1,LGMN,PSMD7,PSMC4,UBC,PSMC2,PSMD2
Cortex	24hrs	aMG	1.77494e-05	11.0284	0.0119631	Reactome	REACTOME_N_GLYCAN_TRIMMING_IN_THE_ER_AND_CALNEXIN_CALRETICULIN_CYCLE	548	4	PDIA3,CALR,CANX,MLEC
Cortex	24hrs	aMG	3.51745e-06	2.84668	0.011991	ChemicalGeneticPerturbations	FOURNIER_ACINAR_DEVELOPMENT_LATE_2	548	22	ACTG1,PFN1,MT2A,CALM1,NOP10,ARHGDIA,H2AFZ,SSB,EIF5B,LDHA,SUPT16H,MANF,NOLC1,RANBP1,TXN,PDIA6,ANP32E,ACTB,CCT2,HSP90B1,DUSP6,PRDX1
Cortex	24hrs	aMG	3.55731e-06	4.08728	0.0121269	ChemicalGeneticPerturbations	LENAOUR_DENDRITIC_CELL_MATURATION_UP	548	13	LPL,TGM2,C1QB,CSF1,CTSC,GATM,PTPRO,CD83,GAS6,DUSP1,FCGR2A,BIRC3,SLA
Cortex	24hrs	aMG	5.61935e-05	8.96057	0.012194	Biocarta	BIOCARTA_CDMAC_PATHWAY	548	4	JUN,FOS,PRKCA,TNF
Cortex	24hrs	aMG	5.61935e-05	8.96057	0.012194	Biocarta	BIOCARTA_CDC42RAC_PATHWAY	548	4	ACTR2,ARPC2,ARPC3,ARPC1B
Cortex	24hrs	aMG	3.58846e-06	4.69363	0.0122331	ChemicalGeneticPerturbations	LEE_AGING_CEREBELLUM_UP	548	11	CTSZ,FOS,C1QC,C1QB,C1QA,GNB2,PTPRO,SELPLG,EPRS,BCL2A1,HEXB
Cortex	24hrs	aMG	3.72932e-06	1.65328	0.0127132	ChemicalGeneticPerturbations	BLALOCK_ALZHEIMERS_DISEASE_UP	548	78	JUN,LPL,H3F3B,SRRT,EEF1A1,RREB1,ULK2,MFAP1,LARP7,CSNK1A1,RBPJ,UBXN1,NAP1L4,MT2A,CSF1,NOP14,CASK,TBC1D5,CSDE1,HADHA,SNX6,HEPH,HDAC1,NOP56,ZFP36,RNASE4,SSR2,CTSB,LUC7L3,EIF5B,BACH2,FAM50A,TNFAIP3,CLIC1,RBM3,ICAM1,JUND,GUSB,BAG1,ANP32B,NOLC1,NAV2,LAT2,ASAH1,FTL,WWOX,CHD1,CUX1,BTG2,NUCKS1,EEF1G,FOXN3,PDE4D,TSPO,ARPC1B,RHEB,KLF2,TPI1,DDX27,ITGA6,TNPO1,EVI2A,COPB1,RBM8A,PDIA4,ZBTB20,DDX21,EPRS,SET,TXNI…
Cortex	24hrs	aMG	3.83248e-06	3.20976	0.0130649	ChemicalGeneticPerturbations	HOLLMANN_APOPTOSIS_VIA_CD40_UP	548	18	ACAT1,MEF2C,PRKCA,ARPC2,RAC2,GTF2F1,HDAC1,SNRPD1,TCEA1,CUX1,ITGB1,FOXN3,RNF19B,ARPC1B,RHEB,TUBA1B,TUBA1C,PAK2
Cortex	24hrs	aMG	3.89842e-06	2.7571	0.0132897	ChemicalGeneticPerturbations	WALLACE_PROSTATE_CANCER_RACE_UP	548	23	TMX4,C1QB,RAC2,C1QA,CSF2RB,CD52,ADAMTS1,CCL4,CTSC,DOCK10,CD83,FLI1,GIMAP6,EVI2A,FCGR2B,HCLS1,SRGN,CCL8,SLFN12,BCL2A1,C5AR1,PLCL1,SLA
Cortex	24hrs	aMG	2.90258e-06	8.96057	0.0135057	GObp	GO_POSITIVE_REGULATION_OF_DNA_TEMPLATED_TRANSCRIPTION_INITIATION	548	6	JUN,PSMC3,PSMC1,PSMC5,PSMC4,PSMC2
Cortex	24hrs	aMG	4.12524e-06	5.56174	0.014063	ChemicalGeneticPerturbations	NAGASHIMA_EGF_SIGNALING_UP	548	9	JUN,FOS,JUNB,ZFP36,EGR1,FOSB,KLF6,ATF3,DUSP1
Cortex	24hrs	aMG	4.19213e-06	1.92785	0.014291	ChemicalGeneticPerturbations	KRIGE_RESPONSE_TO_TOSEDOSTAT_6HR_DN	548	49	CD81,SRRT,EEF1A1,RRP1,NDUFC1,PDCD5,FUBP1,ADAM15,TNFAIP8L2,NHP2,SERBP1,COX7B,C1QBP,CALR,ARHGDIA,NCL,LUC7L,SSB,PSMA2,H2AFY,LUC7L3,EIF5B,PSMA7,NDUFB10,LDHA,PA2G4,MIF,STIP1,PDAP1,GSPT1,SDF2L1,BAG1,NOLC1,RANBP1,BDP1,ASAH1,GNL3,UBL5,CCT3,DNAJA1,TEX261,EIF5A,SRGN,HSPE1,PRDX1,RBM28,PSMC2,SLA,GALNT2
Cortex	24hrs	aMG	4.22703e-06	7.16846	0.01441	ChemicalGeneticPerturbations	YAGI_AML_RELAPSE_PROGNOSIS	548	7	CDK6,NME1,TKT,TSPO,PGD,HSPE1,CD14
Cortex	24hrs	aMG	4.34358e-06	3.60828	0.0148072	ChemicalGeneticPerturbations	TSAI_RESPONSE_TO_IONIZING_RADIATION	548	15	JUNB,CDK6,COX7B,CCL4,MED21,TNFAIP3,CD83,ENO1,RANBP1,PCNA,BTG2,CDKN1A,RRM2B,DUSP6,BIRC3
Cortex	24hrs	aMG	4.372e-06	10.5419	0.0149042	ChemicalGeneticPerturbations	MORI_EMU_MYC_LYMPHOMA_BY_ONSET_TIME_DN	548	5	KLF6,HSPA5,HSP90B1,SURF4,SLA
Cortex	24hrs	aMG	4.37733e-06	4.01681	0.0149223	ChemicalGeneticPerturbations	MATTIOLI_MGUS_VS_PCL	548	13	EEF1A1,JUNB,PFN1,SSR4,PSMD4,TUBB,JUND,ENO1,CCT3,PCNA,SNRPD3,TUBA1B,PSMC4
Cortex	24hrs	aMG	4.43263e-06	3.17813	0.0151108	ChemicalGeneticPerturbations	PAL_PRMT5_TARGETS_UP	548	18	HSPA4,YWHAB,LARP7,SPCS2,LUC7L3,NME1,RBM3,GUSB,ANP32B,NDUFA13,EIF4G2,NOP58,SART3,ANP32E,PSMC3,SET,NDUFB8,SLC25A5
Cortex	24hrs	aMG	4.48128e-06	2.45977	0.0152767	ChemicalGeneticPerturbations	REN_ALVEOLAR_RHABDOMYOSARCOMA_DN	548	28	CD81,CSTB,ACTR2,PRKCA,ADAM10,DAB2,NPTN,SH3BGRL3,P4HB,ARHGDIA,TMED5,CTSB,TMED3,CLIC1,ATP6AP1,SMAD7,KLF6,ERP29,ARPC3,TSPO,ARF1,TPM4,ARPC1B,KLF2,GAS6,DUSP1,AP2S1,HEXB
Cortex	24hrs	aMG	3.34197e-06	7.3793	0.0155502	GObp	GO_ER_NUCLEUS_SIGNALING_PATHWAY	548	7	CALR,CCDC47,CCL2,ATF3,HSPA5,EIF2S1,HSP90B1
Cortex	24hrs	aMG	4.67835e-06	4.9781	0.0159485	ChemicalGeneticPerturbations	SESTO_RESPONSE_TO_UV_C1	548	10	MFAP1,SRSF2,HDAC1,FAM50A,TNFAIP3,GSPT1,CDKN1A,PSMC1,GLUL,PSMC2
Cortex	24hrs	aMG	4.79014e-06	3.05383	0.0163296	ChemicalGeneticPerturbations	ZHANG_RESPONSE_TO_IKK_INHIBITOR_AND_TNF_UP	548	19	DAPP1,SDC4,TNFAIP3,ICAM1,IRAK2,DOCK4,CD83,IL1B,KLF6,RCAN1,BTG2,ATF3,CDKN1A,RNF19B,CXCL16,BIRC3,FRMD4B,TMCC3,BCL2A1
Cortex	24hrs	aMG	4.81495e-06	2.23194	0.0164142	ChemicalGeneticPerturbations	FLECHNER_BIOPSY_KIDNEY_TRANSPLANT_REJECTED_VS_OK_DN	548	34	HSPA4,ACAT1,PRKCA,DAB2,SERBP1,CALM1,COX7B,C1QBP,ANK2,RNASE4,TMED5,TECR,CYB5R3,GATM,FKBP2,PSMD11,NDUFAB1,HPGD,RCAN1,SLC1A1,UQCRQ,TXN,SNRPD3,TMED10,ITGA6,TNPO1,SLC25A4,COX6A1,BBX,HSPE1,CLASP2,NARS,GOLGA4,AKR1A1
Cortex	24hrs	aMG	3.60592e-06	3.01196	0.0167783	GObp	GO_REGULATION_OF_ERK1_AND_ERK2_CASCADE	548	20	JUN,PRKCA,TNF,NPTN,CCL4,CCL4L2,PYCARD,MIF,ICAM1,ATP6AP1,IL1B,CCL2,ATF3,PTPN1,GAS6,DUSP1,PHB2,CCL8,DUSP6,C5AR1
Cortex	24hrs	aMG	7.77859e-05	8.43348	0.0168795	Biocarta	BIOCARTA_LAIR_PATHWAY	548	4	TNF,ICAM1,ITGB1,SELPLG
Cortex	24hrs	aMG	5.30288e-06	6.96933	0.0180775	ChemicalGeneticPerturbations	SEMENZA_HIF1_TARGETS	548	7	HK2,LDHA,ALDOA,ENO1,CDKN1A,TPI1,GAPDH
Cortex	24hrs	aMG	5.32408e-06	3.25839	0.0181498	ChemicalGeneticPerturbations	TONKS_TARGETS_OF_RUNX1_RUNX1T1_FUSION_HSC_DN	548	17	CSF1,SH3BGRL3,CSF2RB,CD52,RHOH,NCF4,CD33,JUND,CCL2,LAT2,STAB1,SELPLG,ITGA6,FCGR2A,BIRC3,CCND3,SLA
Cortex	24hrs	aMG	5.35928e-06	3.39335	0.0182698	ChemicalGeneticPerturbations	MCBRYAN_PUBERTAL_TGFB1_TARGETS_UP	548	16	LPL,TGM2,ACAT1,SIRPA,MEF2C,ADAM10,MAPK14,CYB5R3,CLIC1,CPD,GUSB,TGFBR1,CDKN1A,CD14,IER5,GALNT2
Cortex	24hrs	aMG	5.36124e-06	3.94873	0.0182765	ChemicalGeneticPerturbations	MARKEY_RB1_CHRONIC_LOF_DN	548	13	MSR1,MS4A6A,C1QC,C1QB,C1QA,RHOB,HPGD,CCL2,STAB1,RNF19B,SRGN,CD14,SLFN12L
Cortex	24hrs	aMG	4.07246e-06	2.47188	0.0189492	GObp	GO_PROTEIN_TARGETING	548	28	JUN,ARL6IP1,HSPA4,SSR1,PDIA3,YWHAB,YWHAG,TNF,BSG,ANK2,SPCS2,SSR2,SSR3,UBA52,RPL35,RANBP1,NDUFA13,RERE,NOP58,TSPO,CDC37,GAS6,TNPO1,PHB2,TOMM7,TXNIP,GOLGA4,SEC61G
Cortex	24hrs	aMG	5.6698e-06	5.37634	0.0193284	ChemicalGeneticPerturbations	CUI_GLUCOSE_DEPRIVATION	548	9	PDIA3,CALR,FKBP2,PDIA6,CANX,PDIA4,DNAJB11,TXNIP,TXNRD1
Cortex	24hrs	aMG	5.68078e-06	2.9259	0.0193658	ChemicalGeneticPerturbations	BLUM_RESPONSE_TO_SALIRASIB_UP	548	20	CSNK1A1,UBXN1,P4HB,PSMD8,ANK2,TMED3,SSR3,TNFAIP3,TCEA1,EGR1,EIF2S2,ERP29,ATF3,HSPA9,CDKN1A,CANX,HSP90B1,EPRS,NARS,GOLGA4
Cortex	24hrs	aMG	4.21318e-06	6.23344	0.0196039	GObp	GO_POSITIVE_REGULATION_OF_PHAGOCYTOSIS	548	8	LMAN2,TNF,CALR,MERTK,PYCARD,IL1B,CCL2,GAS6
Cortex	24hrs	aMG	4.22703e-06	7.16846	0.0196684	GObp	GO_NEGATIVE_REGULATION_OF_INTERLEUKIN_6_PRODUCTION	548	7	TNF,BANK1,TNFAIP3,GBA,KLF2,GAS6,INPP5D
Cortex	24hrs	aMG	0.000393969	4.38885	0.0196984	Hallmark	HALLMARK_REACTIVE_OXIGEN_SPECIES_PATHWAY	548	6	JUNB,IPCEF1,FTL,TXN,PRDX1,TXNRD1
Cortex	24hrs	aMG	5.89465e-06	4.48029	0.0200949	ChemicalGeneticPerturbations	ALCALA_APOPTOSIS	548	11	EEF1A1,MFAP1,HMGN1,RAC2,HADHA,RHOH,CCT5,TALDO1,RALB,COX4I1,GAPDH
Cortex	24hrs	aMG	2.98851e-05	4.48029	0.0201425	Reactome	REACTOME_NFKB_AND_MAP_KINASES_ACTIVATION_MEDIATED_BY_TLR4_SIGNALING_REPERTOIRE	548	9	JUN,FOS,MEF2C,MAPK14,UBA52,IRAK2,MEF2A,CD14,DUSP6
Cortex	24hrs	aMG	5.9162e-06	1.98372	0.0201683	ChemicalGeneticPerturbations	WEI_MYCN_TARGETS_WITH_E_BOX	548	44	HSPA4,SSR1,HK2,SERBP1,CCT8,CALM1,NOP14,REXO2,CALR,DYNLL2,NMT1,TUBB,TMED5,EIF5B,SNRPD1,NDUFV3,PA2G4,MPHOSPH10,STIP1,SDF2L1,ALDOA,TMEM167A,ENO1,MANF,NOLC1,HPGD,HNRNPU,NOP58,PSMD14,ANP32E,ITGA6,EIF2S1,CCT2,LRRC58,EIF4G1,DDX21,DNAJB11,DHX9,SURF4,CCT6A,MRPS28,CACYBP,PSMD2,MLEC
Cortex	24hrs	aMG	4.34358e-06	3.60828	0.0202107	GObp	GO_REGULATION_OF_LEUKOCYTE_MIGRATION	548	15	ADAM10,TNF,RAC2,CSF1,C1QBP,CALR,CCL4,PYCARD,ICAM1,IL1B,CCL2,GAS6,CCL8,C5AR1,P2RY12
Cortex	24hrs	aMG	4.372e-06	10.5419	0.0203429	GObp	GO_POSITIVE_REGULATION_OF_TRANSCRIPTION_INITIATION_FROM_RNA_POLYMERASE_II_PROMOTER	548	5	PSMC3,PSMC1,PSMC5,PSMC4,PSMC2
Cortex	24hrs	aMG	6.10314e-06	5.97372	0.0208056	ChemicalGeneticPerturbations	FAELT_B_CLL_WITH_VH_REARRANGEMENTS_DN	548	8	HSPA4,TMX4,NDUFC1,PSMD8,PLCL2,HNRNPU,TMED10,EID1
Cortex	24hrs	aMG	0.000114899	3.34123	0.0213713	Kegg	KEGG_LEUKOCYTE_TRANSENDOTHELIAL_MIGRATION	548	11	ACTG1,PRKCA,RAC2,ITGAM,RHOH,NCF4,MAPK14,MYL12A,ICAM1,ITGB1,ACTB
Cortex	24hrs	aMG	4.61634e-06	4.58448	0.0214798	GObp	GO_POSITIVE_REGULATION_OF_REACTIVE_OXYGEN_SPECIES_METABOLIC_PROCESS	548	11	HSP90AB1,TNF,ROMO1,PARK7,MAPK14,PID1,ICAM1,IL1B,CDKN1A,TSPO,KLF2
Cortex	24hrs	aMG	6.40362e-06	9.95619	0.02183	ChemicalGeneticPerturbations	AMIT_DELAYED_EARLY_GENES	548	5	JUNB,ZFP36,KLF6,BTG2,ATF3
Cortex	24hrs	aMG	6.61411e-06	5.28821	0.0225475	ChemicalGeneticPerturbations	STEARMAN_LUNG_CANCER_EARLY_VS_LATE_DN	548	9	CSTB,CTSZ,LPL,ADAM15,CFL1,CSF2RB,COX6B1,MYO7A,PDIA4
Cortex	24hrs	aMG	6.64319e-06	4.42995	0.0226466	ChemicalGeneticPerturbations	BHATTACHARYA_EMBRYONIC_STEM_CELL	548	11	HSPA4,HNRNPAB,EIF4A1,CCT8,SSB,TUBB,PSMA2,GNL3,DDX21,EPRS,SET
Cortex	24hrs	aMG	6.66318e-06	1.95741	0.0227148	ChemicalGeneticPerturbations	KOINUMA_TARGETS_OF_SMAD2_OR_SMAD3	548	45	DENND4A,TGM2,GNG5,CHD9,JUNB,HNRNPA2B1,FUBP1,RBPJ,PFN1,MT2A,DAPP1,NPTN,TUBB,NME1,TCEA1,GSPT1,FKBP2,ATP1B3,ENO1,CCL2,SMAD7,MORF4L1,ADAMTS6,KLF6,MEF2A,BTG2,ATF3,NUCKS1,TXN,ITGB1,HSPA5,PSMD14,CDKN1A,RHEB,EIF2S1,TNPO1,HSPE1,IL4R,DUSP6,DENR,PRDX1,UBC,PSMC2,TPD52,TXNRD1
Cortex	24hrs	aMG	6.67444e-06	13.0336	0.0227532	ChemicalGeneticPerturbations	AMIT_EGF_RESPONSE_20_HELA	548	4	JUN,FOS,BTG2,TXNIP
Cortex	24hrs	aMG	0.00010618	5.37634	0.0230411	Biocarta	BIOCARTA_P38MAPK_PATHWAY	548	6	MEF2C,HMGN1,MAPK14,TGFBR1,MEF2A,MAP3K5
Cortex	24hrs	aMG	6.83735e-06	2.66787	0.0233085	ChemicalGeneticPerturbations	DACOSTA_UV_RESPONSE_VIA_ERCC3_UP	548	23	TMX4,JUNB,BSG,PSMD8,RGS2,DNASE2,RHOB,PPP1CA,PDAP1,ALDOA,RSL1D1,BAG1,HNRNPU,PCNA,BTG2,ATF3,PSMC3,SLC25A4,GLUL,BOLA2,AP2S1,CCND3,GALNT2
Cortex	24hrs	aMG	5.08334e-06	6.10082	0.0236528	GObp	GO_CHAPERONE_MEDIATED_PROTEIN_FOLDING	548	8	CALR,FKBP3,FKBP2,BAG1,CANX,CCT2,PDIA4,HSPE1
Cortex	24hrs	aMG	7.20605e-06	3.85082	0.0245654	ChemicalGeneticPerturbations	NING_CHRONIC_OBSTRUCTIVE_PULMONARY_DISEASE_DN	548	13	SERINC3,CSTB,YWHAG,SKP1,CD52,COX5B,MANF,CANX,SET,NDUFB8,DENR,C5AR1,AP2S1
Cortex	24hrs	aMG	8.01675e-06	4.71609	0.0273291	ChemicalGeneticPerturbations	YAO_TEMPORAL_RESPONSE_TO_PROGESTERONE_CLUSTER_7	548	10	HSPA4,RREB1,HNRNPA2B1,EIF4A1,EIF3J,PSMA2,ANP32B,ARL8B,EIF2S1,CCT2
Cortex	24hrs	aMG	0.000152558	4.48029	0.0283758	Kegg	KEGG_VIBRIO_CHOLERAE_INFECTION	548	7	ACTG1,PRKCA,ATP6AP1,ARF1,ACTB,PDIA4,SEC61G
Cortex	24hrs	aMG	8.53783e-06	3.42442	0.0291055	ChemicalGeneticPerturbations	NING_CHRONIC_OBSTRUCTIVE_PULMONARY_DISEASE_UP	548	15	FOS,SERF2,H3F3B,EIF4A1,SERBP1,CALM1,COX6B1,FAM50A,CCDC47,EGR1,CDKN1A,PGD,KLF2,COPB1,EPRS
Cortex	24hrs	aMG	6.28099e-06	3.35366	0.0292255	GObp	GO_POSITIVE_REGULATION_OF_APOPTOTIC_SIGNALING_PATHWAY	548	16	SERINC3,PDCD5,PDIA3,YWHAB,YWHAG,PARK7,DYNLL2,NMT1,PYCARD,CTSC,PPP1CA,TGFBR1,WWOX,ATF3,PAK2,DYNLL1
Cortex	24hrs	aMG	8.67638e-06	5.73477	0.0295778	ChemicalGeneticPerturbations	PARK_HSC_AND_MULTIPOTENT_PROGENITORS	548	8	SERF2,H3F3B,MEF2C,NAP1L4,SKP1,CCT8,MAPK14,CNBP
Cortex	24hrs	aMG	8.71115e-06	2.23143	0.0296963	ChemicalGeneticPerturbations	MARTORIATI_MDM4_TARGETS_FETAL_LIVER_DN	548	32	LPL,SSR1,TMX4,ACTR2,USP16,YWHAG,FUBP1,ADAM10,GTF2F1,CSF2RB,NCL,CTSC,EIF5B,SUPT16H,SSR3,TGFBR1,NOLC1,ARL8B,MEF2A,LCP1,NUCKS1,ANP32E,SNX1,TPM4,ARPC1B,LRRC58,EIF4G1,DDX21,EPRS,DHX9,SLC25A5,RBM28
Cortex	24hrs	aMG	8.72938e-06	3.78821	0.0297585	ChemicalGeneticPerturbations	DAZARD_RESPONSE_TO_UV_SCC_UP	548	13	FOS,SSR1,HSP90AB1,TNF,SKP1,PSMD8,JUND,IL1B,RALB,ATF3,PDIA6,COPB1,NAP1L1
Cortex	24hrs	aMG	0.000139563	7.54575	0.0302851	Biocarta	BIOCARTA_MTA3_PATHWAY	548	4	HDAC1,ALDOA,TUBA1C,GAPDH
Cortex	24hrs	aMG	8.91702e-06	5.12033	0.0303981	ChemicalGeneticPerturbations	FLECHNER_PBL_KIDNEY_TRANSPLANT_REJECTED_VS_OK_UP	548	9	ULK2,HNRNPA3,SELPLG,PSMD14,CANX,ANP32E,TMED10,TRA2A,TXNRD1
Cortex	24hrs	aMG	6.54748e-06	1.85637	0.0304654	GObp	GO_POSITIVE_REGULATION_OF_TRANSCRIPTION_FROM_RNA_POLYMERASE_II_PROMOTER	548	52	CD81,JUN,FOS,MEF2C,USP16,JUNB,MAML3,RBPJ,PFN1,TNF,NFIA,TCF12,GTF2F1,CASK,PARK7,NCL,H2AFZ,HDAC1,MAPK14,PID1,MED21,UBA52,EGR1,JUND,IL1B,FLI1,FOSB,SMAD7,GNL3,NR6A1,KLF6,WWOX,MEF2A,RERE,ATF3,NUCKS1,HSPA5,DHX36,PSMC3,PSMC1,KLF2,ITGA6,LPIN2,PSMC5,CNBP,HCLS1,CHCHD2,KLF12,PSMC4,HEXB,UBC,PSMC2
Cortex	24hrs	aMG	6.61411e-06	5.28821	0.0307755	GObp	GO_ER_ASSOCIATED_UBIQUITIN_DEPENDENT_PROTEIN_CATABOLIC_PROCESS	548	9	CCDC47,SDF2L1,HSPA5,PSMC3,PSMC1,PSMC5,HSP90B1,PSMC4,PSMC2
Cortex	24hrs	aMG	6.67444e-06	13.0336	0.0310562	GObp	GO_REGULATION_OF_ESTABLISHMENT_OF_PROTEIN_LOCALIZATION_TO_CHROMOSOME	548	4	CCT8,CCT5,CCT2,CCT6A
Cortex	24hrs	aMG	9.13893e-06	9.43218	0.0311546	ChemicalGeneticPerturbations	RASHI_NFKB1_TARGETS	548	5	CSF1,TNFAIP3,BTG2,DUSP6,BIRC3
Cortex	24hrs	aMG	9.13893e-06	9.43218	0.0311546	ChemicalGeneticPerturbations	AMIT_EGF_RESPONSE_40_MCF10A	548	5	JUN,FOS,ZFP36,EGR1,KLF6
Cortex	24hrs	aMG	6.79315e-06	3.33417	0.0316085	GObp	GO_POSITIVE_REGULATION_OF_ERK1_AND_ERK2_CASCADE	548	16	JUN,PRKCA,TNF,NPTN,CCL4,CCL4L2,PYCARD,MIF,ICAM1,ATP6AP1,IL1B,CCL2,GAS6,PHB2,CCL8,C5AR1
Cortex	24hrs	aMG	6.88373e-06	1.60844	0.03203	GObp	GO_PROTEIN_LOCALIZATION	548	81	CD81,JUN,ARL6IP1,MSR1,HSPA4,CTSA,SSR1,PDIA3,YWHAB,HK2,YWHAG,LMAN2,RBPJ,DAB2,TBC1D9,TNF,RAC2,TBC1D5,CALR,BSG,ANK2,SNX6,SPCS2,RHOH,SSB,MYO7A,H2AFY,SSR2,TMED5,RHOB,NEDD8,TMED3,SSR3,UBA52,TNFAIP3,COPE,ATP6AP1,ATP1B3,CNTNAP2,RPL35,SMAD7,RANBP1,ARL8B,NDUFA13,ERP29,RERE,RALB,ITGB1,NOP58,HSPA5,HSPA9,CANX,DNAJA1,TSPO,ARF1,SNX1,CDC37,RHEB,TMED10,GAS6,BTF3,TNPO1,COPB1,EIF5A,EIF5AL1,PDIA4,HSP90B1,SRGN,PHB2,T…
Cortex	24hrs	aMG	7.18135e-06	1.74292	0.0334148	GObp	GO_MOVEMENT_OF_CELL_OR_SUBCELLULAR_COMPONENT	548	62	ACTG1,ACTR2,SIRPG,SIRPA,MEF2C,ARPC2,TNF,ITGAM,DOCK8,PLXNA4,BSG,MERTK,ARHGDIA,CSF3R,ANK2,CCL4,CCL4L2,SDC4,MYO7A,MAPK14,TUBB,ARSB,DYNLRB1,MIF,ICAM1,ELMO1,ARID5B,PTPRO,DOCK4,TGFBR1,ATP1B3,IL1B,CCL2,LCP1,RERE,SRGAP2,TXN,ITGB1,TRPM4,SEMA5B,ARPC3,SELPLG,PDE4D,DNAJA1,TSPO,TPM4,ARPC1B,MYL6,ITGA6,GAS6,ACTB,CXCL16,INPP5D,CCL8,CACNB2,DYNLL1,CD63,C5AR1,AP2S1,GPX1,HEXB,P2RY12
Cortex	24hrs	aMG	9.95945e-06	3.23998	0.0339518	ChemicalGeneticPerturbations	CASORELLI_ACUTE_PROMYELOCYTIC_LEUKEMIA_UP	548	16	JUN,FOS,PRKCA,MRPL33,RGS2,ZFP36,CD33,PTPRO,FOSB,KLF6,STAB1,PSMA1,PDE3B,KLF2,DUSP1,EVI2A
Cortex	24hrs	aMG	1.0016e-05	6.43323	0.0341447	ChemicalGeneticPerturbations	MA_MYELOID_DIFFERENTIATION_UP	548	7	EEF1A1,DAD1,C1QA,CALR,NCL,CCT5,CDKN1A
Cortex	24hrs	aMG	1.02229e-05	2.2142	0.0348499	ChemicalGeneticPerturbations	MILI_PSEUDOPODIA_HAPTOTAXIS_UP	548	32	PDCD5,YWHAB,ACTR2,USP16,LARP7,HNRNPA3,FAM133B,NFIA,SKP1,TCF12,BZW1,FKBP3,EIF3J,SNX6,ACBD5,SSB,GTPBP4,EIF5B,CYB5R3,DOCK11,TCEA1,GSPT1,TMEM167A,EIF2S2,EIF3E,EIF4G2,MEF2A,HSPA9,DNAJA1,CACYBP,TPD52,NAP1L1
Cortex	24hrs	aMG	1.03545e-05	4.59517	0.0352984	ChemicalGeneticPerturbations	ROSS_AML_WITH_MLL_FUSIONS	548	10	FCGR1B,LY86,SIRPA,MEF2C,MRPL33,PYCARD,GUSB,TRPM4,SRGN,HEXB
Cortex	24hrs	aMG	8.01675e-06	4.71609	0.0373019	GObp	GO_MITOCHONDRIAL_RESPIRATORY_CHAIN_COMPLEX_ASSEMBLY	548	10	NDUFC1,UQCR10,NDUFV3,NDUFB10,NDUFAB1,NDUFA13,NDUFC2,UQCRB,NDUFB8,NDUFA2
Cortex	24hrs	aMG	8.10958e-06	3.61002	0.0377339	GObp	GO_HYDROGEN_TRANSPORT	548	14	COX7A2,UQCR10,COX7B,COX6B1,COX5B,ATP6AP1,COX7C,UQCRQ,COX4I1,SLC9A9,UQCR11,COX6A1,UQCRB,NDUFA4
Cortex	24hrs	aMG	1.10766e-05	2.59237	0.03776	ChemicalGeneticPerturbations	LEI_MYB_TARGETS	548	23	HSPA4,TGM2,ACTR2,DAB2,SERBP1,RGS2,TUBB,NME1,STIP1,MYL12A,ARID5B,IL1B,ANP32B,CCL2,ASAH1,PCNA,CDKN1A,DNAJA1,SRGN,HSPE1,PSMD7,UBC,TXNRD1
Cortex	24hrs	aMG	1.11792e-05	11.9474	0.0381099	ChemicalGeneticPerturbations	KRISHNAN_FURIN_TARGETS_UP	548	4	JUN,FOS,H3F3B,TGM2
Cortex	24hrs	aMG	1.12084e-05	2.34482	0.0382093	ChemicalGeneticPerturbations	GRYDER_PAX3FOXO1_ENHANCERS_KO_DOWN	548	28	CD81,HSPA4,ACTG1,RBPJ,HNRNPA3,ADAM10,ARPC2,NHP2,MDH2,CASK,ANK2,H2AFY,PID1,TNFAIP3,MIF,DOCK10,ELMO1,NOLC1,NAV2,ARL8B,ATF3,ACTB,IL4R,DUSP6,RIMKLB,GALNT2,EID1,M6PR
Cortex	24hrs	aMG	1.15497e-05	3.69801	0.0393728	ChemicalGeneticPerturbations	CHIARADONNA_NEOPLASTIC_TRANSFORMATION_KRAS_UP	548	13	TCF12,CASK,CTSB,RBM3,NAV2,CCL2,PCNA,ANP32E,ITGA6,EVI2A,SET,DHX9,NAP1L1
Cortex	24hrs	aMG	1.17281e-05	2.11548	0.039981	ChemicalGeneticPerturbations	MARTINEZ_TP53_TARGETS_DN	548	35	JUNB,FUBP1,MT2A,SPINT1,NFIA,CALR,ZFP36,CTSB,BACH2,TECR,PDAP1,NAV2,EIF3E,MRPL52,ARL8B,UBL5,CUX1,MAP3K5,KRTCAP2,CDKN1A,CANX,TSPO,PGD,TMED10,TEX261,CCT2,PHB2,EPRS,FRMD4B,TMCC3,PSMC4,GOLGA4,RASSF3,UBC,NDUFA2
Cortex	24hrs	aMG	8.7945e-06	1.87636	0.0409208	GObp	GO_POSITIVE_REGULATION_OF_TRANSPORT	548	49	ARL6IP1,LPL,PDCD5,HSP90AB1,YWHAB,YWHAG,LMAN2,DAB2,TNF,RAC2,CALM1,CASK,TBC1D5,PARK7,CALR,MERTK,PSMD8,ANK2,NCL,DYNLL2,CCL4,NMT1,SDC4,PYCARD,MAPK14,OAZ1,MIF,ATP6AP1,TGFBR1,ATP1B3,IL1B,ANP32B,CCL2,UBL5,ITGB1,TRPM4,TSPO,ARF1,GAS6,GLUL,HCLS1,CD14,TOMM7,CACNB2,CLASP2,IL4R,DYNLL1,CD63,P2RY12
Cortex	24hrs	aMG	1.21246e-05	5.5142	0.0413329	ChemicalGeneticPerturbations	PAPASPYRIDONOS_UNSTABLE_ATEROSCLEROTIC_PLAQUE_UP	548	8	DAB2,CSF2RB,CTSB,GLUL,SRGN,LGMN,DUSP6,MLEC
Cortex	24hrs	aMG	0.000196059	4.32579	0.0425448	Biocarta	BIOCARTA_HIVNEF_PATHWAY	548	7	ACTG1,TNF,MAP3K5,CDK11B,PAK2,BIRC3,CDK11A
Cortex	24hrs	aMG	1.26343e-05	2.51525	0.0430704	ChemicalGeneticPerturbations	BLUM_RESPONSE_TO_SALIRASIB_DN	548	24	FOS,SRRT,JUNB,HNRNPA2B1,SRSF2,FKBP3,H2AFZ,RGS2,HDAC1,TUBB,H2AFY,SNRPD1,TECR,LDHA,ENO1,FOSB,CCL2,RANBP1,PCNA,TPI1,DHX9,NDUFA2,CCND3,GALNT2
Cortex	24hrs	aMG	9.25957e-06	3.40275	0.0430848	GObp	GO_RESPONSE_TO_PURINE_CONTAINING_COMPOUND	548	15	JUN,FOS,JUNB,SLC8A1,BSG,LDHA,NME1,JUND,IL1B,FOSB,CCL2,PDE4D,DUSP1,HSP90B1,P2RY12
Cortex	24hrs	aMG	1.26542e-05	3.6689	0.0431383	ChemicalGeneticPerturbations	RASHI_RESPONSE_TO_IONIZING_RADIATION_2	548	13	JUNB,RBPJ,CSF1,TNFAIP3,ICAM1,KLF6,BTG2,ATF3,CDKN1A,RNF19B,CD14,DUSP6,BIRC3
Cortex	24hrs	aMG	9.27367e-06	1.90134	0.0431504	GObp	GO_RESPONSE_TO_BIOTIC_STIMULUS	548	47	JUN,SERINC3,FOS,MEF2C,JUNB,RBPJ,CDK6,CFL1,TNF,GTF2F1,ROMO1,NCL,CCL4,PYCARD,MAPK14,BANF1,PSMA2,BST2,SNRPD1,CPEB1,CCT5,CCDC47,UBA52,TNFAIP3,ICAM1,IRAK2,JUND,ENO1,IL1B,CCL2,MBD5,STAB1,EEF1G,HSPA5,PDE4D,DHX36,TSPO,EIF2S1,CXCL16,CD14,DDX21,CCL8,IL4R,TXNIP,FCGR3B,C5AR1,GPX1
Cortex	24hrs	aMG	9.58911e-06	1.76473	0.0446181	GObp	GO_REGULATION_OF_ORGANELLE_ORGANIZATION	548	58	PDCD5,YWHAB,ACTR2,MEF2C,YWHAG,PFN1,ARPC2,TBC1D9,TNF,RAC2,CCT8,TBC1D5,C1QBP,PARK7,SH3BGRL3,CALR,PSMD8,ARHGDIA,DYNLL2,NMT1,SDC4,RGS2,PYCARD,ZNF207,TUBB,BST2,H2AFY,PID1,CCT5,ICAM1,IL1B,HNRNPU,RANBP1,GNL3,UBL5,LCP1,CCT3,RALB,ARPC3,SART3,DHX36,TSPO,ARF1,ARPC1B,DUSP1,CCT2,HCLS1,PHB2,TOMM7,CLASP2,SET,SURF4,SLC25A5,BIRC3,DYNLL1,CCT6A,GPX1,EID1
Cortex	24hrs	aMG	6.67601e-05	5.01792	0.0449963	Reactome	REACTOME_MAP_KINASE_ACTIVATION_IN_TLR_CASCADE	548	7	JUN,FOS,MEF2C,MAPK14,IRAK2,MEF2A,DUSP6
Cortex	24hrs	aMG	1.33475e-05	2.76774	0.0455016	ChemicalGeneticPerturbations	QI_PLASMACYTOMA_UP	548	20	ARL6IP1,LY86,TGM2,MFAP1,ACTR2,PFN1,TNF,RAC2,DAPP1,CCL4,PLCL2,TNFAIP3,LCP1,ITGB1,PTPN1,ITGA6,HCLS1,IL4R,FRMD4B,SLA
Cortex	24hrs	aMG	9.81019e-06	1.69213	0.0456468	GObp	GO_MACROMOLECULAR_COMPLEX_ASSEMBLY	548	66	HSPA4,CTSZ,H3F3B,NDUFC1,ACAT1,EIF3CL,YWHAB,USP16,CSNK1A1,EIF3D,HBA2,HBA1,NAP1L4,TNF,CCT8,UQCR10,C1QBP,CALR,PSMD4,PSMD8,EIF3J,SMARCA5,HDAC1,LUC7L,EIF3C,CTSC,ZNF207,TUBB,H2AFY,LUC7L3,SNRPD1,NDUFV3,NDUFB10,UBA52,TNFAIP3,MIF,ALDOA,PSMD11,NDUFAB1,ANP32B,EIF3E,NDUFA13,CCT3,SLC1A1,SART3,NDUFC2,ARF1,SNRPD3,TMED10,TNPO1,CCT2,REPS2,GLUL,HCLS1,UQCRB,EPRS,CLASP2,SET,EIF3A,NDUFB8,BIRC3,DENR,AP2S1,UBC,NDUFA2,N…
Cortex	24hrs	aMG	1.35203e-05	3.04659	0.0460908	ChemicalGeneticPerturbations	LEE_DIFFERENTIATING_T_LYMPHOCYTE	548	17	FUBP1,EIF4A1,RAC2,DOCK8,CD52,RHOH,ZNF207,FLI1,IPCEF1,BTG2,SELPLG,EVI2A,RCSD1,HCLS1,TXNIP,CCND3,SLA
Cortex	24hrs	aMG	1.36576e-05	4.88759	0.0465586	ChemicalGeneticPerturbations	JECHLINGER_EPITHELIAL_TO_MESENCHYMAL_TRANSITION_DN	548	9	FOS,TGM2,ZFP36,EGR1,FOSB,BTG2,ATF3,KLF2,DUSP1
Cortex	24hrs	aMG	1.38511e-05	3.64023	0.0472184	ChemicalGeneticPerturbations	LENAOUR_DENDRITIC_CELL_MATURATION_DN	548	13	NAP1L4,ADAM10,TNF,IL1B,STAB1,BTG2,EVI2A,FCGR2A,CD14,LGMN,DUSP6,TXNIP,C5AR1
Cortex	24hrs	aMG	1.42473e-05	5.41016	0.0485692	ChemicalGeneticPerturbations	SMIRNOV_RESPONSE_TO_IR_2HR_UP	548	8	JUN,H3F3B,CD83,PSMD11,ATF3,CDKN1A,RNF19B,IER5
Cortex	24hrs	ASC	4.94809e-30	4.88019	1.6868e-26	ChemicalGeneticPerturbations	HSIAO_HOUSEKEEPING_GENES	744	71	EIF1,DDX39B,FKBP1A,ACTG1,H3F3B,EEF1A1,JUNB,HSP90AB1,EEF2,ANXA2,DSTN,MSN,CFL1,HSPB1,ARPC2,TMSB4X,EIF4A1,CAPNS1,NCL,GSTP1,DDB1,IQGAP1,PGK1,BRD2,TUBB,UBB,SSB,EZR,HNRNPK,SQSTM1,HSP90AA1,PTMA,YWHAZ,ACTB,NACA,SNRNP70,CCND2,ITGB1,TXN,SLC6A8,EEF1G,ENO1,RPL35,ANP32B,CST3,EEF1D,STAT3,EIF4G2,FTL,LDHB,EIF3E,CALM2,LDHA,TCEA1,ESD,UBA52,KAT6A,GAPDH,CD63,NFKBIA,HNRNPF,PSMD2,NAP1L1,PRDX6,UBC,ATF4,GLUL,PSMB5,S100A…
Cortex	24hrs	ASC	4.70472e-27	2.76674	1.60384e-23	ChemicalGeneticPerturbations	BLALOCK_ALZHEIMERS_DISEASE_DN	744	128	NRXN1,CAP2,CDC42,DLGAP1,DMD,USP14,VDAC1,NDFIP1,CLIP3,GSTM3,PITPNA,SUB1,PTPRT,HMG20A,HSP90AB1,ACTR2,YPEL5,ADCY2,SERBP1,RAB6A,PLCB1,SLC1A4,ARPC2,UBXN4,GRIA2,CAPNS1,PRKAR1A,BCAN,SRSF2,CDH10,NCAN,GRIA1,PDE4B,DHCR7,TSPAN7,CLDN10,PPP2R2B,ARPC5,GPC5,CTNNA2,CCT5,DGKB,CRYM,PGK1,LRP1B,PSMD12,SSB,ADAM23,APP,ROCK2,PTGES3,HNRNPK,LMO4,DNAJA1,HSP90AA1,SLCO1C1,YWHAZ,RTN4,CCT2,TOX,TRIB1,DIO2,CCND2,IFRD1,BHLHE40,T…
Cortex	24hrs	ASC	4.02658e-23	7.57927	1.37266e-19	ChemicalGeneticPerturbations	KARLSSON_TGFB1_TARGETS_UP	744	36	NAA15,ACTG1,ANXA2,CCT8,MSN,RWDD1,TCP1,GTPBP4,SLTM,EIF5A,BMP1,CCT2,MYBBP1A,TIMP1,PTK2,BHLHE40,ZMIZ1,CCT3,HSPA9,TNFRSF12A,RSL1D1,NOLC1,EIF2S2,KLF6,HSPH1,SYNCRIP,SLC20A1,GNL3,PMEPA1,ESD,CD44,GADD45G,DDX21,EIF5,EIF3A,SET
Cortex	24hrs	ASC	2.38167e-22	3.03316	8.1191e-19	ChemicalGeneticPerturbations	BUYTAERT_PHOTODYNAMIC_THERAPY_STRESS_UP	744	92	EIF1,FOS,CDC42,HSPA4,RND3,RHBDF1,HSP90AB1,YPEL5,KDM6B,NRAS,SLC39A14,GADD45A,RAB6A,SLC1A4,PHF3,GNA13,TANC2,NRF1,CEBPG,RABGGTB,PER3,RHOB,TMED5,SPRY2,RGS17,BRD2,TLE1,LUC7L,TIPARP,DST,DNAJA1,SQSTM1,HSP90AA1,PPP2R2A,RBM25,LARP4,RIOK3,TRIB1,IL18,RHOQ,SLC4A7,FGFR1,BHLHE40,SLC3A2,ZMIZ1,SLC6A8,BPGM,TSC22D1,CDKN1A,CCNL1,PFKFB3,POR,SAT1,RSL1D1,NAV2,KLF6,SKIL,HEY1,HSPH1,TJP1,PRKCD,FTL,PTX3,JMJD1C,WSB1,NCOA1,…
Cortex	24hrs	ASC	4.29549e-20	5.48128	2.14774e-18	Hallmark	HALLMARK_TNFA_SIGNALING_VIA_NFKB	744	41	JUN,EIF1,FOS,ID2,JUNB,KDM6B,GADD45A,PDE4B,SDC4,SGK1,RHOB,TIPARP,SQSTM1,LDLR,TRIB1,IL18,BHLHE40,SOCS3,TSC22D1,LIF,CDKN1A,CCNL1,PFKFB3,GADD45B,SAT1,KLF6,HBEGF,PTX3,F3,PMEPA1,TUBB2A,EGR1,CD44,PPP1R15A,PHLDA1,NFKBIA,GEM,ATP2B1,HES1,BTG1,MCL1
Cortex	24hrs	ASC	7.85928e-22	4.21802	2.67923e-18	ChemicalGeneticPerturbations	WANG_TUMOR_INVASIVENESS_UP	744	59	CDC42,HSPA4,AMD1,USP14,ACTG1,SUB1,HBA1,ANXA2,SERBP1,YWHAG,HNRNPAB,PRKAR1A,ARPC5,CCT5,EIF5B,BRD2,TUBB,PAQR7,TUBB6,EZR,HSP90AA1,STRAP,HMGCS1,NISCH,NACA,CCT2,NUCKS1,PCNA,CCT3,GNAO1,TJP2,TKT,HSPA5,ACAT2,ENO1,RPL35,EIF2S2,EIF4G2,HSPH1,ARHGEF12,STIP1,TUBB2B,SSR3,CAMK2G,RAB7A,RALGDS,CD63,NFKBIA,NAP1L1,CMTM5,SGPL1,S100A6,FAU,GLUL,VIM,LRIG1,AGT,CBX5,TUBA1B
Cortex	24hrs	ASC	9.40067e-21	2.92041	3.20469e-17	ChemicalGeneticPerturbations	KOINUMA_TARGETS_OF_SMAD2_OR_SMAD3	744	90	FKBP1A,SLC1A3,NFE2L1,GNG5,JUNB,IRF2BPL,ANXA2,NEDD4,DSTN,SPECC1,GADD45A,CAPNS1,SMG7,ID1,SEPT9,BRD2,TUBB,TMBIM1,TLE1,TUBB6,SPRED1,EMP1,TIPARP,DST,HNRNPK,YWHAZ,RBM25,RIOK3,RTN4,IL18,IFRD1,PURB,PTK2,ITGB1,TXN,NUCKS1,AKAP13,UBQLN1,TSC22D1,TJP2,CDKN1A,ZFP36L1,ITGAV,HSPA5,TNFRSF12A,SAT1,ENO1,ATP1B3,IVNS1ABP,AMOTL1,PCDH1,ACTR3B,KLF6,SKIL,HBEGF,TJP1,SLC20A1,MORF4L1,NME1,JMJD1C,CALM2,F3,UBE2R2,PMEPA1,TCEA1…
Cortex	24hrs	ASC	2.88182e-20	6.37461	9.82413e-17	ChemicalGeneticPerturbations	IGLESIAS_E2F_TARGETS_UP	744	36	IGFBP5,CDC42,ACTG1,ID2,GJA1,HBA2,ANXA2,DSTN,CAPZA2,TMSB4X,APOE,BZW1,RHOB,TUBB,S100A13,EMP1,DNAJA1,HSP90AA1,CCND2,ITGB1,PCNA,GADD45B,SAT1,RBP1,MORF4L1,CALM2,CD9,TUBB2A,CDO1,NFKBIA,S100A6,TUBA1A,S100A10,ZFAND5,CNN3,TUBA1B
Cortex	24hrs	ASC	7.65953e-20	3.37236	2.61113e-16	ChemicalGeneticPerturbations	FLECHNER_BIOPSY_KIDNEY_TRANSPLANT_OK_VS_DONOR_UP	744	70	SPARCL1,AMD1,USP14,ACTG1,H3F3B,SUB1,ACTR2,DSTN,SERBP1,AHCYL1,MSN,PHF3,UBXN4,PRKAR1A,SRSF2,ANK2,CLDN10,ARPC5,BZW1,ID1,ANXA5,CRYM,TMED5,PGK1,MAPRE1,AUTS2,PTGES3,DST,HNRNPK,DNAJA1,SLC5A3,PTPRD,PTMA,TRIM2,SDCBP,ETF1,NACA,COPB1,CCT2,YWHAE,NRIP1,TSC22D1,HSPA5,PSMD11,EEF1D,AZIN1,STAT3,WSB1,CD9,CD44,DDX3X,SCP2,EPS15,PICALM,NAP1L1,OGT,TWF1,RSRC2,AFF1,WWTR1,TUBA1A,CNBP,PAM,TRA2A,VIM,MCL1,NARS,CLASP2,TUBA1B…
Cortex	24hrs	ASC	7.58241e-19	18.2304	5.11055e-16	Reactome	REACTOME_FORMATION_OF_TUBULIN_FOLDING_INTERMEDIATES_BY_CCT_TRIC	744	15	CCT8,TCP1,CCT5,TUBB6,CCT2,CCT3,CCT7,TUBA4A,TUBB2A,TUBB2B,CCT6A,TUBA1A,TUBB4B,TUBA1B,TUBA1C
Cortex	24hrs	ASC	1.43908e-17	5.08021	7.19542e-16	Hallmark	HALLMARK_MYC_TARGETS_V1	744	38	VDAC1,HSP90AB1,HNRNPA3,SERBP1,DDX18,EIF4A1,SRSF2,EIF3J,TCP1,CCT5,PGK1,SSB,NOP56,PTGES3,ETF1,CCT2,IFRD1,PCNA,CCT3,YWHAE,RSL1D1,NOLC1,EIF2S2,EIF4G2,SYNCRIP,CCT7,RANBP1,GNL3,NME1,LDHA,GSPT1,PA2G4,NAP1L1,TRA2B,DDX21,CNBP,SET,EPRS
Cortex	24hrs	ASC	5.20655e-19	4.12574	1.77491e-15	ChemicalGeneticPerturbations	PENG_GLUTAMINE_DEPRIVATION_DN	744	52	HSPA4,AMD1,VDAC1,HSP90AB1,CAPRIN1,DDX18,HNRNPAB,DHCR7,NCL,TCP1,RABGGTB,BZW1,ZFP36L2,CCT5,EIF5B,TUBB,PSMD12,SSB,PSME4,NOP56,CEBPZ,DNAJA1,HSP90AA1,STRAP,PPP2R2A,EIF5AL1,CCT2,SNRNP70,TRIB1,PFKP,SLC4A7,PRODH,HSPA5,ACAT2,PSMD11,ATP1B3,NOLC1,EIF4G2,SYNCRIP,TUBA4A,LDHB,NME1,LDHA,STIP1,GSPT1,MPHOSPH10,VCP,CCT6A,RRS1,DDX21,EIF5,TUBB4B
Cortex	24hrs	ASC	6.40404e-19	2.32168	2.18314e-15	ChemicalGeneticPerturbations	DIAZ_CHRONIC_MEYLOGENOUS_LEUKEMIA_UP	744	120	HP1BP3,AMD1,GNL2,USP14,NDFIP1,PITPNA,SUB1,HMG20A,HSP90AB1,ACTR2,ALDH6A1,DSTN,CAPRIN1,CCT8,AHCYL1,MSN,WDR1,HNRNPAB,CAPZA2,CAPNS1,PRKAR1A,SRSF2,SMARCA5,EIF3J,TCP1,DDB1,KTN1,UBE2D2,ST13,PGK1,GTPBP4,CAPZB,KDSR,SLC2A1,PSMD12,SSB,TMBIM1,SEC63,VAPA,ZNF281,PTGES3,HNRNPK,LMO4,SQSTM1,SLC5A3,STRAP,YWHAZ,HMGCS1,SDCBP,ETF1,RTN4,SLC16A1,CCT2,SRSF10,IFRD1,MAP4K4,PFKP,TIMP1,CGGBP1,CYP51A1,TXN,CCT3,IVD,TSC22D1,ZF…
Cortex	24hrs	ASC	6.88021e-19	2.63266	2.34546e-15	ChemicalGeneticPerturbations	GRYDER_PAX3FOXO1_ENHANCERS_IN_TADS	744	96	FAM49A,CAV2,HP1BP3,HSPA4,TGOLN2,VDAC1,ACTG1,WDR43,MAT2A,HNRNPA3,SMPDL3A,CAPRIN1,ARGLU1,SAMD4A,NFIA,WDR1,GADD45A,HNRNPAB,ARPC2,GNA13,PRKAR1A,RGMA,CEBPG,ADAMTS1,ANK2,TSPAN7,DDB1,CCT5,RGS17,ACTR3C,SSB,NAPG,PXDN,TLE1,MSI2,AUTS2,VAPA,APP,EZR,HNRNPK,LMO4,CEBPZ,PTPRD,YWHAZ,ACTB,RRM2B,NACA,CADM2,GPHN,NCAM1,CCND2,ST3GAL4,SRSF10,RHOQ,MAP4K4,ITGB1,ZMIZ1,SOX6,SOCS3,ZFP36L1,POR,RSL1D1,NAV2,NOLC1,RBMS1,STAT3,H…
Cortex	24hrs	ASC	9.34931e-19	3.94495	3.18718e-15	ChemicalGeneticPerturbations	YOSHIMURA_MAPK8_TARGETS_DN	744	54	IGFBP5,CDC42,AMD1,ACTG1,BDNF,PITPNA,CTTN,SUB1,NFIA,GADD45A,THOC2,GRIA2,NEO1,PDE4B,CEBPG,RABGGTB,PGK1,NUPR1,APP,EMP1,ROCK2,YWHAZ,HMGCS1,SLC16A1,COPB1,LDLR,GPHN,DIO2,PURB,FGFR1,CYP51A1,BHLHE40,CCT3,IVD,CCNL1,HSPA9,POR,NOLC1,CST3,HSPH1,NME1,OGT,SLC4A4,TRA2B,HMGCR,TWF1,EIF5,VMP1,DCLK1,S100A10,INSIG1,DUSP6,CNN3,MAGI1
Cortex	24hrs	ASC	9.77134e-19	5.62105	3.33105e-15	ChemicalGeneticPerturbations	NAGASHIMA_NRG1_SIGNALING_UP	744	37	JUN,FOS,CTTN,JUNB,KDM6B,GADD45A,ID1,SGK1,GTPBP4,PSME4,TUBB6,EZR,TIPARP,DST,LDLR,TRIB1,IFRD1,BHLHE40,LIF,CCNL1,PFKFB3,TNFRSF12A,GADD45B,KLF6,HBEGF,TUBB2A,EGR1,PPP1R15A,FERMT2,CAMK2G,PHLDA1,GEM,TRA2B,HES1,EIF5,MCL1,ZFAND5
Cortex	24hrs	ASC	2.50027e-18	3.26906	8.52342e-15	ChemicalGeneticPerturbations	KIM_ALL_DISORDERS_CALB1_CORR_UP	744	67	FAM49A,NRXN1,CAP2,USP14,VDAC1,CLIP3,NFE2L1,SUB1,HSP90AB1,ACTR2,EEF2,HNRNPA3,DSTN,CAPZA2,TBC1D9,GRIA2,PRKAR1A,SRSF2,SNRPB,DGKB,CRYM,EHBP1,PGK1,BRD2,CLTB,PSMD12,UBB,ADAM23,HNRNPK,DNAJA1,HSP90AA1,PPP2R2A,RTN4,CCT2,PFKP,BHLHE40,NRIP1,TKT,TRIB2,PSMD11,DOCK4,TUBA4A,SLC20A1,RGS7,GPM6A,SRP19,CALM2,SYT11,STIP1,MIF,OMG,RNF11,TUBB2A,EPS15,CAMK2G,INPP5F,ATP2B1,ATP1B1,HMGCR,UBC,RSRC2,EIF5,DCLK1,ZFAND5,SET,NAR…
Cortex	24hrs	ASC	7.19504e-17	9.5169	1.33828e-14	Kegg	KEGG_PATHOGENIC_ESCHERICHIA_COLI_INFECTION	744	21	CDC42,ACTG1,CTTN,ARPC2,NCL,ARPC5,TUBB,TUBB6,EZR,ROCK2,ARPC1B,YWHAZ,ACTB,ITGB1,TUBA4A,TUBB2A,TUBB2B,TUBA1A,TUBB4B,TUBA1B,TUBA1C
Cortex	24hrs	ASC	6.76329e-18	2.8926	2.30561e-14	ChemicalGeneticPerturbations	WONG_ADULT_TISSUE_STEM_MODULE	744	78	JUN,EIF1,IGFBP5,FOS,DMD,ID2,BDNF,SLC12A2,GJA1,MFGE8,JUNB,HMG20A,MAGI2,MSN,NDRG2,APOE,GRIA2,TAF1D,PPP1R9A,LAMA2,ADAMTS1,KTN1,ID1,PHLPP1,RHOB,PAQR7,NUPR1,S100A13,TMBIM1,PXDN,TLE1,TUBB6,MSI2,APP,EMP1,DST,SLC35E4,ARPC1B,HLF,IL18,NCAM1,RHOQ,BHLHE40,TXN,KCND2,SLC3A2,SOX6,FZD2,SOCS3,NRIP1,TSC22D1,CDKN1A,CNTN1,RBP1,ACTR3B,KLF6,HBEGF,MRPL52,ITM2C,F3,PMEPA1,GATM,GSPT1,PPP1R15A,ASTN1,FERMT2,KCNK2,PHLDA1,ALC…
Cortex	24hrs	ASC	1.21017e-17	3.24248	4.12548e-14	ChemicalGeneticPerturbations	BERENJENO_TRANSFORMED_BY_RHOA_UP	744	65	JUN,HSPA4,NAA15,USP14,BDNF,WDR43,GJA1,SEMA4B,SPECC1,DDX18,MSN,GADD45A,TMSB4X,TAF1D,EIF3J,RABGGTB,PGK1,SLC2A1,TUBB6,EZR,PTGES3,SLC35E4,HSP90AA1,ETF1,ZFPM2,IFRD1,TIMP1,TXN,PCNA,BPGM,CCT3,CDKN1A,NOP58,PSMD11,ATP1B3,IVNS1ABP,RSL1D1,IRGM,HSPH1,HBEGF,CHD1,CCT7,RANBP1,NME1,CFL2,LDHA,STIP1,ESD,CD44,MRPL18,PA2G4,KCNK2,PHLDA1,ALCAM,GAPDH,CCT6A,RRS1,NFKBIA,TXNRD1,SLC4A4,DDX21,PSMB5,DUSP6,NASP,CBX5
Cortex	24hrs	ASC	2.44669e-17	3.30889	8.34077e-14	ChemicalGeneticPerturbations	SENESE_HDAC3_TARGETS_UP	744	62	CPEB4,IGFBP5,HSPA4,FAT3,CTTN,HSP90AB1,ACTR2,SLC14A1,TBC1D9,SUPT6H,GNA13,PDE4B,PDLIM4,SMG7,IQGAP1,RHOB,CTSB,TPP1,RFX3,PSME4,TMEM30A,SPRED1,EZR,EMP1,DST,SQSTM1,ZBTB38,YWHAZ,SLC16A1,GPHN,TRIB1,CCND2,ITGB1,HAPLN1,SAT1,SEPT11,ENHO,TEAD1,DOCK4,KLF6,BDP1,EFHD2,PTX3,JMJD1C,WSB1,STIP1,CD44,DDX3X,IL1RAPL1,TNIK,CDV3,KAT6A,PHLDA1,NFKBIA,GEM,ATP2B1,SF3B1,TM4SF1,TUBA1A,BTG1,MCL1,EPRS
Cortex	24hrs	ASC	3.40507e-17	2.19789	1.58438e-13	GObp	GO_REGULATION_OF_CELL_DEATH	744	121	JUN,CPEB4,CDC42,NAA15,CLIP3,BDNF,CTTN,JUNB,HSP90AB1,HBA2,HBA1,SYCP2,SERBP1,YWHAG,GADD45A,CFL1,MT3,HSPB1,APOE,NES,PPARGC1A,NCL,GSTP1,TCP1,RABGGTB,STK40,DDB1,ID1,ANXA5,PHLPP1,SGK1,RHOB,CTSB,SPRY2,UBB,NUPR1,TMBIM1,TLE1,HNRNPK,PHIP,DNAJA1,SQSTM1,YWHAZ,TRIM2,RBM25,RRM2B,NACA,RTN4,BMP1,MYBBP1A,SOX9,ZFPM2,MAP4K4,TIMP1,FGFR1,PTK2,ITGB1,TXN,PRODH,PTPRZ1,SOCS3,YWHAE,AKAP13,UBQLN1,CDKN1A,ITGAV,HSPA9,HSPA5,T…
Cortex	24hrs	ASC	2.50508e-16	14.3239	1.68842e-13	Reactome	REACTOME_PREFOLDIN_MEDIATED_TRANSFER_OF_SUBSTRATE_TO_CCT_TRIC	744	15	CCT8,TCP1,CCT5,TUBB6,ACTB,CCT2,CCT3,CCT7,TUBA4A,TUBB2A,TUBB2B,CCT6A,TUBA1A,TUBB4B,TUBA1C
Cortex	24hrs	ASC	3.59278e-15	4.67914	1.79639e-13	Hallmark	HALLMARK_MTORC1_SIGNALING	744	35	IGFBP5,HSPA4,ACTR2,SLC1A4,DHCR7,PGK1,SLC2A1,PSMD12,NUPR1,SQSTM1,HMGCS1,ETF1,LDLR,IFRD1,CYP51A1,BHLHE40,CDKN1A,HSPA9,HSPA5,ENO1,EIF2S2,TUBA4A,LDHA,CD9,TCEA1,STIP1,PPP1R15A,GAPDH,SLC7A5,CCT6A,TXNRD1,HMGCR,PSMB5,INSIG1,EPRS
Cortex	24hrs	ASC	5.46838e-17	4.04079	1.86417e-13	ChemicalGeneticPerturbations	JIANG_HYPOXIA_NORMAL	744	47	JUN,CDC42,H3F3B,EEF1A1,MFGE8,YPEL5,SERBP1,SIRPA,NDRG2,GNA13,DHCR7,SDC4,NCL,SLC2A1,RFX3,NUPR1,TMEM30A,YWHAZ,HLF,SDCBP,CCND2,TIMP1,PRODH,NUCKS1,SLC3A2,ZFP36L1,HSPA5,GADD45B,SAT1,ATP1B3,EIF2S2,KLF6,CD9,PPP1R15A,CKB,PPP1R3C,RALGDS,NFKBIA,NAP1L1,CHPT1,SGPL1,TSC22D3,BTG1,MCL1,NARS,TUBA1B,TFG
Cortex	24hrs	ASC	5.96408e-17	5.14742	2.03315e-13	ChemicalGeneticPerturbations	PENG_LEUCINE_DEPRIVATION_DN	744	36	HSPA4,AMD1,VDAC1,WDR43,HSP90AB1,WDR1,NCL,TCP1,CCT5,PGK1,BRD2,SSB,PSME4,NOP56,PTGES3,CEBPZ,DNAJA1,HSP90AA1,ETF1,CCT2,HSPA5,ACAT2,PSMD11,EIF4G2,TUBA4A,LDHB,LDHA,TNFRSF1A,STIP1,GSPT1,CCT6A,PSMD2,UBC,DDX21,EIF5,TUBB4B
Cortex	24hrs	ASC	7.76339e-17	2.42622	2.64654e-13	ChemicalGeneticPerturbations	GOBERT_OLIGODENDROCYTE_DIFFERENTIATION_DN	744	98	JUN,NEGR1,CDH20,FOS,DDHD1,HSPA4,RNF144A,AMD1,CLIP3,SLC1A3,MAPK8IP3,SPECC1,CYP2J2,WDR1,HNRNPAB,VPS37A,MT3,GRIA2,CDH10,NCAN,NEO1,PDE4B,TTYH1,PPP2R2B,MMD2,TULP4,LRRC4C,PER3,EHBP1,PDLIM7,TPP1,TMBIM1,PXDN,TMEM30A,MAPRE1,MSI2,EZR,DST,ARPC1B,SLC5A3,PPP2R2A,BTBD17,NISCH,TRIM2,ACTB,HLF,RBM25,RTN4,BMP1,CADM2,BHLHE40,PTPRZ1,SOCS3,GNAO1,PDE4D,DHRS1,GADD45B,SAT1,SLC15A2,KIRREL3,NAV2,IRGM,NHSL1,DTNA,RBMS1,DOCK…
Cortex	24hrs	ASC	9.232e-17	3.98947	3.14719e-13	ChemicalGeneticPerturbations	PASINI_SUZ12_TARGETS_DN	744	47	JUN,CAV2,IGFBP5,RND3,ID2,BDNF,ANXA2,SAMD4A,MSN,ANXA5,RHOB,PDLIM7,TMBIM1,PXDN,TMEM30A,TUBB6,APP,PHIP,BMP1,TRIB1,FARP1,BHLHE40,ITGB1,FZD2,CDKN1A,ITGAV,MTPN,TNFRSF12A,RBP1,AMOTL1,RBMS1,KLF6,SKIL,HBEGF,GHR,CFL2,SYT11,F3,TTYH3,PHLDA1,ADK,S100A6,WWTR1,TUBA1A,S100A10,VIM,DUSP6
Cortex	24hrs	ASC	1.20994e-16	3.45006	4.1247e-13	ChemicalGeneticPerturbations	BAELDE_DIABETIC_NEPHROPATHY_DN	744	56	IGFBP2,OSMR,ACTG1,CLIP3,GJA1,NFE2L1,SUB1,MAGI2,HNRNPA3,DSTN,GADD45A,PRKAR1A,PDE4B,SDC4,UBE2D2,TMED5,NAPG,NUPR1,DST,DNAJA1,HSP90AA1,PTPRD,YWHAZ,KBTBD11,TIMP1,CYP51A1,YWHAE,ITGAV,HSPA5,TRIB2,SEPT11,GRIK2,RBMS1,ERBB4,GHR,FRY,CALM2,MED21,F3,KIF5B,RNF11,TUBB2A,MYL12A,EPS15,SEC61G,FERMT2,CDV3,PRDX6,GLUL,PAM,VIM,TSC22D3,LRIG1,MCL1,FGFR2,SET
Cortex	24hrs	ASC	2.68172e-16	3.15162	9.14198e-13	ChemicalGeneticPerturbations	ONKEN_UVEAL_MELANOMA_DN	744	62	CSGALNACT1,CAV2,DMD,TGOLN2,GSTM3,ID2,NFE2L1,PMM1,HSP90AB1,CDH19,ALDH6A1,DSTN,CAPRIN1,SERBP1,WDR1,SIRPA,APOE,PRKAR1A,PDE4B,SDC4,GSTP1,NKTR,RABGGTB,FAM184A,SPRY2,ST13,TPP1,MAPRE1,TIPARP,ZBTB38,ERC1,SYBU,RIOK3,SLC16A1,SOX9,NAA50,CGGBP1,YWHAE,NRIP1,PDE4D,TJP2,TKT,RSL1D1,TJP1,MED21,CD44,DDX3X,DLG1,RAB7A,CDV3,PPP1R3C,PHLDA1,IP6K1,NAP1L1,TWF1,NMT2,EIF1B,ZBTB20,GLUL,CNBP,BTG1,CNN3
Cortex	24hrs	ASC	2.81339e-16	3.69309	9.59086e-13	ChemicalGeneticPerturbations	RHEIN_ALL_GLUCOCORTICOID_THERAPY_DN	744	50	JUN,FOS,VDAC1,HSP90AB1,HNRNPA3,GPM6B,ALDH6A1,SERBP1,CCT8,AHCYL1,HSPB1,EHBP1,ST13,PGK1,TUBB,PXDN,EMP1,SLC5A3,ANP32E,BHLHE40,PCNA,CCT3,TKT,SEPT11,ENO1,IVNS1ABP,RSL1D1,ANP32B,CCT7,LDHB,NME1,LDHA,CD9,MIF,ESD,EGR1,SCP2,GAPDH,METAP2,CCT6A,NAP1L1,PRDX6,CNBP,LRIG1,DUSP6,NASP,SET,TUBA1B,EPRS,TUBA1C
Cortex	24hrs	ASC	6.09289e-16	4.36538	2.07707e-12	ChemicalGeneticPerturbations	PENG_RAPAMYCIN_RESPONSE_DN	744	40	HSPA4,AMD1,ID2,WDR43,HSP90AB1,SLC39A14,CAPZA2,RABGGTB,CCT5,PGK1,NOP56,PTGES3,DNAJA1,HSP90AA1,PPP2R2A,ETF1,RTN4,BMP1,CCT2,TRIB1,SLC3A2,HSPA9,HSPA5,ACAT2,PSMD11,ATP1B3,EIF4G2,SYNCRIP,LDHB,NME1,STIP1,GSPT1,DDX3X,PICALM,SLC7A5,VCP,CCT6A,DDX21,PSMB5,NARS
Cortex	24hrs	ASC	8.09223e-16	5.34759	2.75864e-12	ChemicalGeneticPerturbations	PHONG_TNF_RESPONSE_VIA_P38_PARTIAL	744	32	JUN,ID2,BDNF,JUNB,CDH19,KDM6B,SLC39A14,ID1,TRAPPC4,TIPARP,SQSTM1,SLC5A3,LDLR,LIF,CDKN1A,ITGAV,TRIB2,STAT3,KLF6,HEY1,SLC20A1,PTX3,PCDH7,TUBB2A,TUBB2B,CD44,PHLDA1,ALCAM,INSIG1,MCL1,MFHAS1,TSC22D2
Cortex	24hrs	ASC	1.14801e-15	4.71846	3.91356e-12	ChemicalGeneticPerturbations	TONKS_TARGETS_OF_RUNX1_RUNX1T1_FUSION_MONOCYTE_UP	744	36	WDR43,DDX18,HSPB1,APOE,NES,TCP1,NOP14,GTPBP4,PSMD12,PXDN,NOP56,TUBB6,SLC5A3,SLC16A1,EIF5A,MYBBP1A,CCND2,FARP1,PFKP,FGFR1,HSPA5,ATP1B3,NOLC1,SLC20A1,NME1,ARHGEF12,DDR1,GSPT1,PA2G4,FERMT2,CKB,PHLDA1,TM4SF1,PSMB5,DUSP6,EPRS
Cortex	24hrs	ASC	1.56338e-15	2.78357	5.32956e-12	ChemicalGeneticPerturbations	KIM_BIPOLAR_DISORDER_OLIGODENDROCYTE_DENSITY_CORR_UP	744	71	FKBP1A,ACTG1,CLIP3,NFE2L1,EEF1A1,SUB1,PTPRT,PMM1,HNRNPA3,DSTN,CCT8,HNRNPAB,CFL1,SLC1A4,ARPC2,CAPNS1,PRKAR1A,NCL,TSPAN7,TCP1,DDB1,CRYM,EHBP1,PGK1,CLTB,PSMD12,UBB,HNRNPK,PPP2R2A,NISCH,NACA,KBTBD11,CCT2,FARP1,CCT3,TKT,TRIB2,PSMD11,ENO1,RPL35,FTL,TUBA4A,LDHB,LARP1,EIF3E,GLDC,RGS7,SRP19,SYT11,STIP1,MIF,OMG,ATP6AP1,RNF11,TUBB2A,EPS15,CAMK2G,ALCAM,SLC7A5,IP6K1,PSMD2,TRA2B,PRDX6,UBC,FAU,CNBP,PSMB5,PAM,VI…
Cortex	24hrs	ASC	2.96797e-15	2.99775	1.01178e-11	ChemicalGeneticPerturbations	FEVR_CTNNB1_TARGETS_DN	744	62	DMD,NAA15,USP14,SLC12A2,HBA2,KCNQ1,CAPRIN1,ARGLU1,AHCYL1,HNRNPAB,EIF4A1,SRSF2,SDC4,NCL,SMARCA5,TCP1,CCT5,CRYM,GTPBP4,TUBB,SSB,NOP56,MSI2,LUC7L,STRAP,YWHAZ,LARP4,NACA,CCT2,SOX9,TOX,CCND2,PFKP,SLC4A7,PCNA,CCT3,NRIP1,IVD,NOP58,ACAT2,NOLC1,EEF1D,EIF2S2,EIF3E,SYT11,KIF5B,CD44,PA2G4,CDO1,CDV3,RRS1,NAP1L1,SF3B1,RSRC2,DDX21,EIF5,LRIG1,EIF3A,NASP,CBX5,CNN3,SET
Cortex	24hrs	ASC	7.48785e-15	4.25123	2.55261e-11	ChemicalGeneticPerturbations	CONCANNON_APOPTOSIS_BY_EPOXOMICIN_UP	744	38	JUN,CAP2,FOS,HSPA4,ANXA2,SYCP2,AKAP6,GADD45A,HSPB1,CYP4F2,CEBPG,CLTB,PSMD12,SQSTM1,IFRD1,SLC3A2,CDKN1A,HSPA9,SAT1,PSMD11,DTNA,KLF6,SKIL,HSPH1,TUBA4A,STIP1,CD44,PPP1R15A,TMF1,PLAT,CAMK2G,CDK11A,SLC7A5,GEM,GADD45G,WWTR1,EIF5,LRIG1
Cortex	24hrs	ASC	1.17022e-14	5.05413	3.98928e-11	ChemicalGeneticPerturbations	KIM_WT1_TARGETS_8HR_UP	744	31	JUN,NAA15,JUNB,AHCYL1,SIRPA,SUPT6H,PDLIM4,EMP1,HSP90AA1,EIF5A,SOX9,TRIB1,RHOQ,FGFR1,ZMIZ1,IVNS1ABP,RSL1D1,HSPH1,HBEGF,PRKCD,TUBA4A,SLC20A1,PCDH7,WSB1,PA2G4,METAP2,GEM,ATP2B1,TM4SF1,AFF1,WWTR1
Cortex	24hrs	ASC	1.65857e-14	2.55608	5.65406e-11	ChemicalGeneticPerturbations	WEI_MYCN_TARGETS_WITH_E_BOX	744	76	CDC42,HSPA4,AMD1,GNL2,NAA15,USP14,SLC12A2,WDR43,CTTN,ANXA2,MAP7D1,NEDD4,SERBP1,SAMD4A,CCT8,DDX18,LAS1L,WDR1,SLC39A14,PLCB1,BCAN,RABGGTB,KTN1,NOP14,EIF5B,DOT1L,TMED5,PGK1,TUBB,FNDC4,PSMD12,MAPRE1,TUBB6,EMP1,NLN,ZBTB38,ANP32E,LARP4,ETF1,SLC16A1,CCT2,SNRNP70,CKAP4,TRIB1,CCND2,UBQLN1,GNAO1,TJP2,TPRKB,NOP58,ENDOD1,ENO1,NOLC1,SRXN1,HSPH1,SYNCRIP,CCT7,EFHD2,SLC20A1,CFL2,SRP19,CALM2,STIP1,MRPL18,MPHOSPH1…
Cortex	24hrs	ASC	1.69778e-14	4.24594	5.78774e-11	ChemicalGeneticPerturbations	OSWALD_HEMATOPOIETIC_STEM_CELL_IN_COLLAGEN_GEL_UP	744	37	JUN,FOS,H3F3B,SLC12A2,JUNB,AHCYL1,LAS1L,PDE4B,ACSL6,SGK1,SPRY2,SSB,PSME4,TIPARP,EIF5A,TRIB1,RHOQ,AKAP13,CDKN1A,ZFP36L1,GADD45B,PSMD11,EEF1D,KLF6,LARP1,PTX3,RAB5C,F3,EGR1,CD44,PPP1R15A,FERMT2,PHLDA1,NFKBIA,GALNT2,SF3B1,MCL1
Cortex	24hrs	ASC	1.80253e-14	5.14192	6.14482e-11	ChemicalGeneticPerturbations	GROSS_HYPOXIA_VIA_ELK3_DN	744	30	FOS,GJA1,SLC39A14,GADD45A,PDLIM4,SPRY2,SLC2A1,IFRD1,BHLHE40,PFKFB3,HSPA5,SAT1,ENO1,KLF6,SKIL,HBEGF,SLC20A1,JMJD1C,EGR1,CD44,PPP1R15A,EPS15,NFKBIA,TM4SF1,AFF1,ATF4,ZBTB20,ACAP2,EPRS,LAMP2
Cortex	24hrs	ASC	1.8408e-14	5.50488	6.27527e-11	ChemicalGeneticPerturbations	PICCALUGA_ANGIOIMMUNOBLASTIC_LYMPHOMA_DN	744	28	JUN,EIF1,AMD1,H3F3B,ID2,YPEL5,KDM6B,GADD45A,TIPARP,IFRD1,PDE4D,CCNL1,GADD45B,KLF6,CHD1,JMJD1C,RNF11,TUBB2A,DDX3X,PPP1R15A,TRA2B,RSRC2,EIF5,TSC22D3,BTG1,MCL1,ZFAND5,TSC22D2
Cortex	24hrs	ASC	2.13237e-14	2.45553	7.26927e-11	ChemicalGeneticPerturbations	LEE_BMP2_TARGETS_DN	744	81	HSPA4,RND3,AMD1,NAA15,WDR43,GJA1,MAT2A,SAMD4A,CCT8,DDX18,YWHAG,USP24,HNRNPAB,TAF1D,SMARCA5,EIF3J,BZW1,ID1,DOT1L,TMED5,PGK1,GTPBP4,PSMD12,TRAPPC4,SSB,TMEM30A,NOP56,LUC7L,NLN,HSP90AA1,STRAP,ANP32E,LARP4,ETF1,SLC16A1,LDLR,MYBBP1A,NAA50,SRSF10,IFRD1,PURB,CYP51A1,NUCKS1,ZMIZ1,CCT3,UBQLN1,HSPA9,HSPA5,TNFRSF12A,NOP58,NOLC1,EIF2S2,AZIN1,HSPH1,HBEGF,SYNCRIP,CHD1,CCT7,RANBP1,SLC20A1,LARP1,GNL3,PTX3,NME1,MD…
Cortex	24hrs	ASC	2.286e-14	2.0609	1.06368e-10	GObp	GO_REGULATION_OF_CELL_DIFFERENTIATION	744	115	JUN,NEGR1,IGFBP5,GFAP,DDX39B,FOS,CDC42,DMD,NDFIP1,ID2,BDNF,GJA1,SEMA4B,CTTN,JUNB,HMG20A,MAGI2,PRDM16,NEDD4,CAPRIN1,AKAP6,YWHAG,WDR1,CFL1,PLCB1,MT3,ARPC2,SUPT6H,APOE,PPP1R9A,ADAMTS1,MMD2,LRRC4C,ZFP36L2,ID1,CTNNA2,SGK1,SPRY2,NR1D1,PDLIM7,RORA,HES5,RFX3,TMEM30A,DAB1,APP,ROCK2,NLN,HNRNPK,LMO4,PTPRD,STRAP,SDCBP,NACA,RTN4,S1PR3,SOX9,TRIB1,IL18,ZFPM2,IFRD1,PURB,FGFR1,PTK2,ITGB1,SOX6,PTPRZ1,SOCS3,AKAP13,…
Cortex	24hrs	ASC	3.15603e-14	4.37303	1.07589e-10	ChemicalGeneticPerturbations	KIM_WT1_TARGETS_UP	744	35	RND3,CDC42SE1,ACTG1,JUNB,KDM6B,SDC4,PDLIM4,SGK1,SPRY2,APP,HMGCS1,ACTB,SOX9,TRIB1,CYP51A1,BHLHE40,ZMIZ1,LIF,ZFP36L1,TNFRSF12A,HBEGF,PRKCD,SLC20A1,PTX3,PCDH7,F3,EGR1,CD44,FERMT2,NFKBIA,GEM,ATP2B1,ATP1B1,TM4SF1,WWTR1
Cortex	24hrs	ASC	3.23117e-14	1.99078	1.10151e-10	ChemicalGeneticPerturbations	PUJANA_BRCA1_PCC_NETWORK	744	123	DDX39B,HSPA4,GNL2,VDAC1,WDR43,MAT2A,EEF1A1,SUB1,ACTR2,EEF2,HNRNPA3,CAPRIN1,SERBP1,CCT8,DDX18,NRAS,HNRNPAB,THOC2,SLC1A4,ARPC2,EIF4A1,GNA13,SRSF2,CEBPG,NCL,EIF1AY,SMARCA5,TCP1,SNRPB,RABGGTB,BZW1,SMG7,NOP14,CCT5,EIF5B,UBE2D2,TMED5,PGK1,SSB,PSME4,RGS6,MAPRE1,NOP56,PTGES3,HNRNPK,CEBPZ,HSP90AA1,PTMA,ANP32E,ACTB,LARP4,ETF1,NACA,SLC16A1,EIF5AL1,COPB1,CCT2,SRSF10,CYP51A1,TXN,PCNA,CCT3,YWHAE,PFKFB3,HSPA9,T…
Cortex	24hrs	ASC	3.23125e-14	2.47053	1.10153e-10	ChemicalGeneticPerturbations	DACOSTA_UV_RESPONSE_VIA_ERCC3_DN	744	79	JUN,CAV2,CAP2,OSMR,DMD,BDNF,WDR43,GJA1,NEDD4,SAMD4A,USP24,RAB6A,THOC2,PHF3,SMARCA5,ZFP36L2,ID1,PHLPP1,UBE2D2,SEPT9,EHBP1,PHF21A,FAM172A,PSME4,TLE1,APP,ROCK2,TIPARP,DST,PHIP,ERC1,PPP2R2A,TRIM2,LARP4,LDLR,SOX9,IFRD1,SLC4A7,PTK2,BHLHE40,ZMIZ1,AKAP13,NRIP1,TJP2,TEAD1,RBMS1,DOCK4,AZIN1,KLF6,CHD1,PTX3,RGS7,NCOA1,MDN1,F3,PTPN2,EPS15,DLG1,FERMT2,MED13L,KAT6A,ALCAM,INPP5F,PICALM,WRN,ATP2B1,TXNRD1,STAG1,OG…
Cortex	24hrs	ASC	3.33546e-14	1.98296	1.55199e-10	GObp	GO_REGULATION_OF_MULTICELLULAR_ORGANISMAL_DEVELOPMENT	744	124	JUN,NEGR1,NRXN1,GFAP,DDX39B,FOS,CDC42,DMD,NDFIP1,ID2,BDNF,GJA1,SEMA4B,GNG5,CTTN,HMG20A,MAGI2,PRDM16,GPM6B,NEDD4,CAPRIN1,AKAP6,YWHAG,WDR1,CFL1,PLCB1,MT3,HSPB1,SUPT6H,APOE,PPP1R9A,LAMA2,ADAMTS1,GPC6,MMD2,LRRC4C,ID1,PHLPP1,SGK1,RHOB,HES5,PSMD12,UBB,RFX3,NUPR1,PSME4,TMEM30A,DAB1,LUC7L,APP,ROCK2,NLN,HNRNPK,PTPRD,STRAP,SDCBP,NACA,RTN4,S1PR3,BMP1,SOX9,TRIB1,ZFPM2,IFRD1,PURB,TIMP1,FGFR1,PTK2,ITGB1,SOX6,P…
Cortex	24hrs	ASC	5.09589e-14	3.20856	1.73719e-10	ChemicalGeneticPerturbations	BOQUEST_STEM_CELL_CULTURED_VS_FRESH_UP	744	51	JUN,EIF1,JUNB,NDRG2,SLC1A4,APOE,ANK2,PER3,ID1,RHOB,SPRY2,PGK1,RORA,LRP1B,SLC5A3,PTPRD,HLF,TRIB1,BHLHE40,HAPLN1,AKAP13,NRIP1,IL33,TMEM100,CCNL1,PFKFB3,TIMP4,GADD45B,SEPT11,EIF2S2,KLF6,HBEGF,CD9,EGR1,CD44,CDO1,PPP1R15A,KCNK2,PPP1R3C,PHLDA1,ALCAM,SLC7A5,NFKBIA,GEM,CELF2,TXNRD1,GADD45G,EIF5,ZBTB20,DCLK1,TSC22D3
Cortex	24hrs	ASC	3.16916e-13	8.57633	2.13602e-10	Reactome	REACTOME_PROTEIN_FOLDING	744	17	CCT8,TCP1,CCT5,NOP56,TUBB6,ACTB,CCT2,CCT3,CCT7,TUBA4A,TUBB2A,TUBB2B,CCT6A,TUBA1A,TUBB4B,TUBA1B,TUBA1C
Cortex	24hrs	ASC	7.72848e-14	4.05453	2.63464e-10	ChemicalGeneticPerturbations	DAZARD_RESPONSE_TO_UV_NHEK_UP	744	37	JUN,IGFBP2,FOS,ID2,JUNB,HSP90AB1,ANXA2,CYP2J2,GADD45A,APOE,CAPNS1,LAMA2,SGK1,NR1D1,PGK1,BRD2,CLTB,UBB,MYL6,TRIB1,TXN,PHACTR1,TSC22D1,GADD45B,HBEGF,TUBA4A,RANBP1,TUBB2A,PPP1R15A,SEC61G,PHLDA1,GEM,TM4SF1,EIF1B,ATF4,BTG1,TUBB4B
Cortex	24hrs	ASC	8.38606e-14	2.94221	2.85881e-10	ChemicalGeneticPerturbations	MILI_PSEUDOPODIA_HAPTOTAXIS_UP	744	57	NAA15,WDR43,ACTR2,HNRNPA3,CCDC141,SAMD4A,NFIA,USP24,CAPZA2,RWDD1,CTTNBP2NL,EIF3J,BZW1,EIF5B,UBE2D2,ST13,UBXN2A,GTPBP4,SLTM,HES5,SSB,SPRED1,HNRNPK,DNAJA1,STRAP,HMGCS1,RBM25,RIOK3,NAA50,CCND2,HSPA9,MTPN,IVNS1ABP,IRGM,DTNA,EIF2S2,EIF4G2,EIF3E,OXR1,CFL2,KIF5B,TCEA1,PTPN2,GSPT1,SCP2,CDV3,FYTTD1,METAP2,CELF2,STAG1,NAP1L1,CHPT1,SF3B1,TRA2B,WWTR1,DCLK1,NUFIP2
Cortex	24hrs	ASC	8.96546e-14	2.59232	3.05632e-10	ChemicalGeneticPerturbations	RODRIGUES_THYROID_CARCINOMA_ANAPLASTIC_UP	744	70	HSPA4,RND3,GNL2,NAA15,ACTR2,ANXA2,CAPRIN1,NRAS,PLCB1,THOC2,SLC1A4,SUPT6H,UBXN4,EIF4A1,CEBPG,SNRPB,BZW1,IQGAP1,EIF5B,GTPBP4,SLC2A1,PSMD12,SSB,RFX3,TMEM30A,ZDHHC20,NOP56,NLN,PHIP,CEBPZ,ZBTB38,HSP90AA1,YWHAZ,SLC16A1,EIF5A,LDLR,CCT2,NAA50,IFRD1,ITGB1,LIF,HSPA9,TNFRSF12A,WDR17,ENO1,RBMS1,EIF2S2,EIF4G2,OXR1,KIF5B,STIP1,MPHOSPH10,DDX3X,SSR3,DLG1,FYTTD1,SLC7A5,CCT6A,ADK,ATP2B1,TXNRD1,STAG1,SF3B1,TWF1,EIF…
Cortex	24hrs	ASC	1.00067e-13	3.63429	3.41128e-10	ChemicalGeneticPerturbations	TARTE_PLASMA_CELL_VS_PLASMABLAST_DN	744	42	HSPA4,GNL2,USP14,VDAC1,CAPRIN1,MSN,TCP1,CCT5,IQGAP1,SGK1,PGK1,PSME4,ETF1,SLC16A1,LDLR,CCT2,CCND2,PFKP,ITGB1,TXN,PCNA,CDKN1A,HSPA9,TKT,ATP1B3,CCT7,TUBA4A,LDHB,GLDC,NME1,GSPT1,SLC7A5,CCT6A,TRA2B,AFF1,EIF5,TUBA1A,S100A10,EIF3A,NASP,CBX5,NARS
Cortex	24hrs	ASC	1.50517e-13	2.50561	5.13111e-10	ChemicalGeneticPerturbations	PUJANA_CHEK2_PCC_NETWORK	744	73	DDX39B,HSPA4,GNL2,WDR43,MAT2A,HNRNPA3,SERBP1,CCT8,DDX18,HNRNPAB,SLC1A4,GNA13,SRSF2,CEBPG,NCL,SMARCA5,TCP1,SNRPB,BZW1,SMG7,NOP14,CCT5,EIF5B,PGK1,SSB,NOP56,CEBPZ,HSP90AA1,PTMA,ANP32E,LARP4,NACA,SLC16A1,EIF5AL1,CCT2,SRSF10,PCNA,CCT3,YWHAE,HSPA9,ACAT2,NOLC1,EIF2S2,HSPH1,SYNCRIP,RANBP1,LDHB,NME1,SRP19,MED21,LDHA,TCEA1,MIF,PTPN2,GSPT1,MPHOSPH10,PA2G4,SEC61G,CDV3,METAP2,SLC7A5,WRN,RRS1,HNRNPF,NAP1L1,TRA…
Cortex	24hrs	ASC	1.59469e-13	2.0597	7.4201e-10	GObp	GO_NEUROGENESIS	744	108	JUN,NEGR1,NRXN1,GFAP,CDC42,DMD,SLC1A3,ID2,BDNF,GJA1,SEMA4B,CTTN,HMG20A,MAGI2,EEF2,MAPK8IP3,PRDM16,NEDD4,CAPRIN1,YWHAG,WDR1,NRAS,CFL1,GABRB1,THOC2,MT3,APOE,CTNND2,PPP1R9A,NEO1,SDC4,LAMA2,ADAMTS1,GSTP1,MMD2,LRRC4C,ID1,CTNNA2,IQGAP1,SGK1,RORA,HES5,UBB,TRAPPC4,TMEM30A,DAB1,VAPA,APP,EZR,HNRNPK,LMO4,HSP90AA1,PTPRD,RTN4,PREX2,SOX9,NCAM1,IFRD1,FARP1,SLC4A7,FGFR1,PTK2,ITGB1,SOX6,PTPRZ1,FZD2,NRXN3,YWHAE,GN…
Cortex	24hrs	ASC	1.68882e-13	1.93889	7.85806e-10	GObp	GO_REGULATION_OF_PROTEIN_MODIFICATION_PROCESS	744	124	JUN,CAV2,FKBP1A,CDC42,DMD,NDFIP1,CLIP3,MAGI2,HSP90AB1,MAPK8IP3,ADCY2,ANXA2,FAM20A,AKAP6,YWHAG,GADD45A,NDRG2,PLCB1,MT3,HSPB1,SUPT6H,APOE,PRKAR1A,PPP1R9A,PPARGC1A,SDC4,GSTP1,PPP2R2B,STK40,MMD2,CCNL2,LRRC4C,ID1,PHLPP1,IQGAP1,DDRGK1,SPRY2,UBXN2A,GTPBP4,HES5,PSMD12,UBB,NUPR1,PSME4,DAB1,SPRED1,AUTS2,APP,EZR,ROCK2,PHIP,DNAJA1,SQSTM1,HSP90AA1,STRAP,PPP2R2A,SDCBP,BMP1,SOX9,TRIB1,IL18,CCND2,FARP1,MAP4K4,FG…
Cortex	24hrs	ASC	1.76464e-11	4.0107	8.82322e-10	Hallmark	HALLMARK_HYPOXIA	744	30	JUN,FOS,ANXA2,BCAN,NCAN,PPARGC1A,SDC4,PGK1,RORA,SLC2A1,TIPARP,PFKP,BHLHE40,CDKN1A,PFKFB3,HSPA5,ENO1,DTNA,KLF6,WSB1,LDHA,F3,MIF,PPP1R15A,PPP1R3C,GAPDH,PHKG1,PAM,HK1,BTG1
Cortex	24hrs	ASC	2.90315e-13	2.51111	9.89683e-10	ChemicalGeneticPerturbations	KIM_ALL_DISORDERS_OLIGODENDROCYTE_NUMBER_CORR_UP	744	71	GFAP,FKBP1A,ACTG1,NFE2L1,PMM1,EEF2,DSTN,CCT8,CAPZA2,CFL1,GABRB1,ARPC2,TBC1D9,CAPNS1,NCAN,DHCR7,NCL,TSPAN7,TCP1,SNRPB,ECI1,DDB1,CRYM,PGK1,CLTB,FNDC4,UBB,KBTBD11,CCT2,PFKP,SLC3A2,CCT3,TKT,TRIB2,ENO1,RPL35,ANP32B,DOCK4,EIF4G2,CCT7,FTL,TUBA4A,SLC20A1,LDHB,RGS7,SYT11,CD9,STIP1,MIF,OMG,ATP6AP1,RNF11,TUBB2A,EPS15,CAMK2G,CKB,ARCN1,GAPDH,IP6K1,PSMD2,TRA2B,HMGCR,FAU,TUBA1A,DCLK1,PSMB5,PAM,VIM,NARS,CLASP2,T…
Cortex	24hrs	ASC	3.04829e-13	2.00714	1.41837e-09	GObp	GO_POSITIVE_REGULATION_OF_PROTEIN_METABOLIC_PROCESS	744	112	JUN,CAV2,DDX39B,FKBP1A,CDC42,RNF144A,NDFIP1,CLIP3,GJA1,MAGI2,HSP90AB1,EEF2,MAPK8IP3,ADCY2,ANXA2,FAM20A,NEDD4,SAMD4A,AKAP6,MSN,GADD45A,PLCB1,MT3,HSPB1,APOE,PRKAR1A,PPP1R9A,PPARGC1A,SDC4,CEBPG,MMD2,CCNL2,IQGAP1,DDRGK1,SPRY2,HES5,PSMD12,UBB,NUPR1,PSME4,DAB1,AUTS2,APP,EZR,ROCK2,TIPARP,HNRNPK,SQSTM1,SDCBP,EIF5A,EIF5AL1,BMP1,SOX9,TRIB1,IL18,CCND2,FGFR1,PTK2,ITGB1,TXN,PTPRZ1,SOCS3,UBQLN1,IL33,ADRA1A,LIF…
Cortex	24hrs	ASC	6.53785e-13	2.29103	2.22875e-09	ChemicalGeneticPerturbations	LOPEZ_MBD_TARGETS	744	82	EIF1,IGFBP2,CDC42,GSTM3,MAT2A,CTTN,SUB1,JUNB,PMM1,EEF2,RAB6A,CFL1,THOC2,SUPT6H,EIF4A1,SDC4,GSTP1,EIF3J,STK40,DDB1,MRFAP1,ANXA5,CCT5,SGK1,RHOB,UBE2D2,DOT1L,ST13,CAPZB,SLTM,SLC2A1,PSMD12,PXDN,APP,EZR,PTGES3,BMP1,NCAM1,IFRD1,FGFR1,CYP51A1,PCNA,BPGM,CCT3,YWHAE,TSC22D1,CDKN1A,FAM107A,GADD45B,ENO1,EEF1D,EIF2S2,ACTR3B,TUBA4A,EIF3E,RAB5C,LDHA,TCEA1,STIP1,TUBB2B,PA2G4,DDX3X,UBA52,CKB,CDK11A,RALGDS,PICALM,…
Cortex	24hrs	ASC	6.64089e-13	2.93398	2.26388e-09	ChemicalGeneticPerturbations	DACOSTA_UV_RESPONSE_VIA_ERCC3_COMMON_DN	744	53	JUN,CAP2,BDNF,WDR43,NEDD4,SAMD4A,USP24,RAB6A,THOC2,PHF3,ID1,PHLPP1,UBE2D2,SEPT9,EHBP1,PHF21A,TLE1,ROCK2,TIPARP,DST,PHIP,PPP2R2A,TRIM2,LARP4,LDLR,IFRD1,SLC4A7,PTK2,BHLHE40,ZMIZ1,NRIP1,TJP2,RBMS1,KLF6,CHD1,RGS7,NCOA1,MDN1,F3,PTPN2,EPS15,FERMT2,MED13L,KAT6A,INPP5F,PICALM,WRN,ATP2B1,STAG1,OGT,NMT2,AFF1,CLASP2
Cortex	24hrs	ASC	7.60992e-13	3.77597	2.59422e-09	ChemicalGeneticPerturbations	LU_AGING_BRAIN_UP	744	37	CAV2,GFAP,GJA1,AHCYL1,MSN,SLC14A1,PHF3,GPC5,ANXA5,PHLPP1,IQGAP1,KDSR,NUPR1,TIPARP,SLC16A1,ITGB1,IL33,ITGAV,ANP32B,DDR1,GATM,MYL12A,SCP2,FERMT2,PICALM,NFKBIA,SLC4A4,TM4SF1,PRDX6,TWF1,AFF1,WWTR1,VIM,LRIG1,AGT,FGFR2,LAMP2
Cortex	24hrs	ASC	8.39643e-13	9.54927	2.86234e-09	ChemicalGeneticPerturbations	LEIN_ASTROCYTE_MARKERS	744	15	PLA2G7,SPARCL1,GFAP,GJA1,MFGE8,APOE,BCAN,NCAN,HEPACAM,CST3,GLDC,CD63,PRDX6,GLUL,MAGI1
Cortex	24hrs	ASC	8.6896e-13	1.91324	2.96229e-09	ChemicalGeneticPerturbations	BLALOCK_ALZHEIMERS_DISEASE_UP	744	121	JUN,IGFBP5,GFAP,DMD,H3F3B,GJA1,MAT2A,NFE2L1,EEF1A1,NPAS3,ADCY2,ANXA2,SYCP2,GPM6B,DDX18,THOC2,SLC14A1,BCAN,PPP1R9A,LAMA2,PCDH9,NKTR,PDLIM4,ECI1,KTN1,ZFP36L2,NOP14,IQGAP1,SGK1,EIF5B,SEPT9,CTSB,BRD2,KDSR,PHF21A,SLC2A1,TMBIM1,PSME4,SEC63,NOP56,APP,EMP1,TIPARP,DST,ARPC1B,HSP90AA1,PTMA,LARP4,RIOK3,COPB1,LDLR,SNRNP70,SOX9,CKAP4,IL18,NCAM1,ST3GAL4,IFRD1,RHOQ,PDPN,SLC4A7,CGGBP1,FGFR1,NUCKS1,ZMIZ1,SLC6A8,S…
Cortex	24hrs	ASC	6.49951e-13	2.39874	3.02422e-09	GObp	GO_REGULATION_OF_CELL_DEVELOPMENT	744	75	NEGR1,GFAP,DDX39B,CDC42,DMD,ID2,BDNF,SEMA4B,CTTN,HMG20A,MAGI2,NEDD4,CAPRIN1,AKAP6,YWHAG,WDR1,CFL1,MT3,ARPC2,APOE,PPP1R9A,ADAMTS1,MMD2,LRRC4C,ID1,SGK1,HES5,RFX3,TMEM30A,DAB1,APP,ROCK2,HNRNPK,PTPRD,STRAP,SDCBP,NACA,RTN4,S1PR3,SOX9,TRIB1,IFRD1,FGFR1,PTK2,ITGB1,PTPRZ1,AKAP13,LIF,TJP2,CNTN1,TNFRSF12A,ZNF706,STAT3,SKIL,ERBB4,ITM2C,NME1,NCOA1,TNFRSF1A,OMG,ATP6AP1,IL1RAPL1,TNIK,INPP5F,HOOK3,GRID2,HES1,WW…
Cortex	24hrs	ASC	9.37868e-13	3.06112	3.19719e-09	ChemicalGeneticPerturbations	GRYDER_PAX3FOXO1_ENHANCERS_KO_DOWN	744	49	FAM49A,HSPA4,VDAC1,ACTG1,HNRNPA3,SMPDL3A,CAPRIN1,GADD45A,ARPC2,PRKAR1A,RGMA,CEBPG,ANK2,RGS17,ACTR3C,NAPG,PXDN,MSI2,AUTS2,VAPA,APP,HNRNPK,LMO4,CEBPZ,YWHAZ,ACTB,GPHN,CCND2,RHOQ,MAP4K4,ZMIZ1,SOCS3,NAV2,NOLC1,STAT3,HSPH1,EFHD2,KIF5B,CD9,MIF,RNF11,LRRFIP2,CELF2,GALNT2,NLGN1,VIM,FGFR2,DUSP6,TSC22D2
Cortex	24hrs	ASC	1.28111e-12	2.88618	4.3673e-09	ChemicalGeneticPerturbations	SWEET_LUNG_CANCER_KRAS_UP	744	53	PLA2G7,ID2,SLC12A2,GJA1,EEF2,SPECC1,ARGLU1,LAS1L,SIRPA,GADD45A,CTNND2,NCL,RABGGTB,IQGAP1,CTSB,ST13,PGK1,TMEM30A,MAPRE1,NOP56,SLC16A1,IL18,ST3GAL4,BHLHE40,SOCS3,CDKN1A,HSPA9,HSPA5,SAT1,SLC15A2,EEF1D,AZIN1,HSPH1,EIF3E,GNL3,ITM2C,LDHA,F3,CD9,CD44,PHLDA1,ARCN1,GAPDH,CD63,ATP1B1,SLC4A4,VMP1,SLC38A2,PSMB5,HK1,BTG1,TMEM56,DUSP6
Cortex	24hrs	ASC	1.43272e-12	3.86706	4.88413e-09	ChemicalGeneticPerturbations	WINTER_HYPOXIA_METAGENE	744	35	JUN,IGFBP2,IGFBP5,FOS,ID2,ANXA2,SIRPA,ANXA5,PGK1,SLC2A1,RIOK3,SLC16A1,BHLHE40,TXN,SLC3A2,SLC6A8,CDKN1A,PFKFB3,HSPA5,SAT1,ENO1,HSPH1,FTL,SLC20A1,LDHB,LDHA,F3,MIF,EGR1,GAPDH,CCT6A,HK1,VIM,INSIG1,BTG1
Cortex	24hrs	ASC	1.10678e-12	2.07612	5.14985e-09	GObp	GO_MOVEMENT_OF_CELL_OR_SUBCELLULAR_COMPONENT	744	99	NRXN1,CDC42,DMD,RHBDF1,ACTG1,BDNF,WDR43,GJA1,SEMA4B,CTTN,ACTR2,MAPK8IP3,KCNQ1,SBDS,CCDC141,MSN,NRAS,USP24,SIRPG,SIRPA,RAB6A,CAPZA2,HSPB1,ARPC2,GNA13,NEO1,PDE4B,SDC4,LAMA2,SLC7A10,ANK2,GPC6,ARPC5,KTN1,ID1,CTNNA2,CAPZB,TUBB,UBB,RFX3,DAB1,APP,EZR,DST,MYL6,ARPC1B,DNAJA1,HSP90AA1,ACTB,SDCBP,RTN4,SLC16A1,NCAM1,PDPN,FGFR1,PTK2,ITGB1,TXN,SLC3A2,PHACTR1,NRXN3,YWHAE,PDE4D,ITGAV,TNFRSF12A,ATP1B3,KIRREL3,AMO…
Cortex	24hrs	ASC	1.85124e-12	7.83699	6.31087e-09	ChemicalGeneticPerturbations	NAGASHIMA_EGF_SIGNALING_UP	744	17	JUN,FOS,JUNB,KDM6B,ID1,TIPARP,TRIB1,BHLHE40,LIF,TNFRSF12A,KLF6,HBEGF,EGR1,PHLDA1,GEM,HES1,MCL1
Cortex	24hrs	ASC	2.37418e-12	2.80905	8.09359e-09	ChemicalGeneticPerturbations	SCHAEFFER_PROSTATE_DEVELOPMENT_6HR_DN	744	54	RND3,ID2,HSP90AB1,MAP7D1,NEDD4,CAPRIN1,NFIA,KDM6B,CFL1,PLCB1,EIF4A1,SMARCA5,EIF3J,BZW1,ID1,RHOB,SEPT9,ST13,PSMD12,AUTS2,VAPA,APP,PTGES3,PTPRD,PTMA,YWHAZ,S1PR3,MYBBP1A,SNRNP70,SOX9,ITGB1,NUCKS1,PTPRZ1,YWHAE,NRIP1,TJP2,NOLC1,CHD1,SCAPER,MORF4L1,CSPG5,ADIPOR1,GSPT1,ATP1B1,PSMD2,CHPT1,GADD45G,HMGCR,BTG1,CAMK1D,EIF3A,NASP,SET,NUFIP2
Cortex	24hrs	ASC	1.96966e-12	2.33037	9.16484e-09	GObp	GO_CENTRAL_NERVOUS_SYSTEM_DEVELOPMENT	744	76	NRXN1,GFAP,CDC42,H3F3B,ID2,MAPK8IP3,CCDC141,KDM6B,NDRG2,PLCB1,GABRB1,MT3,NES,BCAN,NCAN,PPARGC1A,GSTP1,PCDH9,ID1,CTNNA2,RORA,TPP1,HES5,ADAM23,DAB1,APP,HNRNPK,LMO4,HMGCS1,ACTB,RTN4,SOX9,FGFR1,PTK2,SLC6A11,ITGB1,SOX6,PTPRZ1,HAPLN1,YWHAE,GNAO1,LIF,CNTN1,PFKFB3,TIMP4,MTPN,HSPA5,KIRREL3,NAV2,ANP32B,STAT3,ERBB4,NME1,CALM2,WNT7B,NCOA1,LDHA,CD9,CKB,MACROD2,PHLDA1,ARCN1,WRN,ATP2B1,HOOK3,OGT,GRID2,TRA2B,BAG…
Cortex	24hrs	ASC	2.22117e-12	2.16462	1.03351e-08	GObp	GO_NEGATIVE_REGULATION_OF_PROTEIN_METABOLIC_PROCESS	744	88	JUN,CPEB4,IGFBP5,FKBP1A,DMD,USP14,GRIN2C,HSP90AB1,ANXA2,CAPRIN1,SAMD4A,YWHAG,GADD45A,NDRG2,MT3,HSPB1,SUPT6H,APOE,PRKAR1A,PPARGC1A,GSTP1,LRRC4C,SPRY2,ST13,GTPBP4,PSMD12,UBB,SPRED1,APP,EZR,ROCK2,DNAJA1,STRAP,SDCBP,SNRNP70,TRIB1,FARP1,TIMP1,SOCS3,YWHAE,PDE4D,LIF,CDKN1A,TIMP4,ITGAV,POR,TRIB2,GADD45B,PSMD11,CST3,AZIN1,STAT3,HSPH1,WNK2,HBEGF,SYNCRIP,PRKCD,EIF3E,ITM2C,PTX3,FRY,CALM2,FMN2,PMEPA1,MIF,PTPN…
Cortex	24hrs	ASC	2.40941e-12	1.91694	1.1211e-08	GObp	GO_REGULATION_OF_PHOSPHORUS_METABOLIC_PROCESS	744	116	JUN,CAV2,CAP2,FKBP1A,CDC42,DMD,CLIP3,MAGI2,HSP90AB1,MAPK8IP3,ADCY2,ANXA2,FAM20A,AKAP6,YWHAG,MIDN,GADD45A,NDRG2,PLCB1,MT3,HSPB1,APOE,PRKAR1A,PPP1R9A,PPARGC1A,SDC4,GSTP1,PPP2R2B,STK40,MMD2,CCNL2,LRRC4C,SMG7,ID1,PHLPP1,IQGAP1,DDRGK1,SPRY2,GTPBP4,HES5,UBB,DAB1,SPRED1,APP,EZR,ROCK2,LMO4,PHIP,DNAJA1,SQSTM1,STRAP,PPP2R2A,SDCBP,LDLR,BMP1,SOX9,TRIB1,IL18,CCND2,FARP1,MAP4K4,FGFR1,PTK2,ITGB1,TXN,PTPRZ1,FZD2…
Cortex	24hrs	ASC	3.48693e-12	3.3953	1.1887e-08	ChemicalGeneticPerturbations	SMID_BREAST_CANCER_RELAPSE_IN_BONE_DN	744	40	PYGB,AMD1,MFGE8,CDH19,GPM6B,TTYH1,CLDN10,ZFP36L2,FNDC4,LMO4,ANP32E,YWHAZ,TRIM2,RIOK3,SLC16A1,EIF5A,BMP1,SOX9,PDPN,PTPRZ1,HAPLN1,YWHAE,ENO1,RBP1,KLF6,LDHB,GLDC,ITM2C,PTX3,STIP1,TUBB2B,CD44,CDV3,PICALM,SLC7A5,MRAS,TM4SF1,WWTR1,MCL1,EPRS
Cortex	24hrs	ASC	4.19277e-12	8.07184	1.42932e-08	ChemicalGeneticPerturbations	MENSSEN_MYC_TARGETS	744	16	HSP90AB1,NCL,NOP56,HSP90AA1,EIF5AL1,CCT3,YWHAE,HSPA9,ENO1,HSPH1,LDHB,NME1,LDHA,METAP2,DDX21,EPRS
Cortex	24hrs	ASC	4.75069e-12	3.36327	1.61951e-08	ChemicalGeneticPerturbations	LEI_MYB_TARGETS	744	40	HSPA4,GJA1,ACTR2,SERBP1,MSN,HSPB1,GSTP1,KTN1,ZFP36L2,BRD2,TUBB,NUPR1,DST,DNAJA1,CCND2,BHLHE40,PCNA,CDKN1A,POR,SAT1,ANP32B,EEF1D,TUBA4A,SLC20A1,LDHB,PTX3,NME1,DDR1,STIP1,TUBB2A,MYL12A,SLC7A5,TXNRD1,TM4SF1,UBC,S100A10,VIM,TSC22D3,BTG1,MCL1
Cortex	24hrs	ASC	3.93496e-12	2.20164	1.83094e-08	GObp	GO_CELLULAR_RESPONSE_TO_ENDOGENOUS_STIMULUS	744	83	JUN,CAV2,CPEB4,IGFBP2,IGFBP5,FKBP1A,FOS,PAQR8,GNG5,EEF1A1,JUNB,MAGI2,EEF2,ADCY2,KCNQ1,NEDD4,AKAP6,AHCYL1,MSN,YWHAG,GABRB1,MT3,PRKAR1A,PDE4B,PPARGC1A,RGMA,ADAMTS1,GSTP1,ID1,ANXA5,IQGAP1,SGK1,CTSB,NR1D1,RORA,PAQR7,UBB,SPRED1,APP,EZR,ROCK2,HNRNPK,PHIP,DNAJA1,HMGCS1,BMP1,SOX9,RHOQ,FGF14,FGFR1,PTK2,ITGB1,SOX6,NRIP1,PDE4D,TMEM100,POR,STAT3,KLF6,SKIL,HEY1,PRKCD,GHR,NCOA1,PMEPA1,CD9,ADIPOR1,STXBP4,PTPN2,…
Cortex	24hrs	ASC	6.45716e-12	10.2233	2.20125e-08	ChemicalGeneticPerturbations	SARTIPY_NORMAL_AT_INSULIN_RESISTANCE_UP	744	13	STK40,SLC2A1,NOP56,TUBB6,BHLHE40,SOCS3,NOP58,SRXN1,TUBB2A,EGR1,PHLDA1,HMGCR,DUSP6
Cortex	24hrs	ASC	6.54546e-12	3.45593	2.23135e-08	ChemicalGeneticPerturbations	WEST_ADRENOCORTICAL_TUMOR_UP	744	38	USP14,VDAC1,SLC1A3,GRIN2C,GNG5,ACTR2,NRAS,GADD45A,PDE4B,DHCR7,CEBPG,TCP1,PSME4,TMEM30A,MAPRE1,HMGCS1,RIOK3,RTN4,SLC16A1,FGFR1,CYP51A1,TXN,ACAT2,PSMD11,ENO1,EIF2S2,SLC20A1,KIF5B,MRPL18,GAPDH,SLC7A5,CCT6A,HMGCR,TWF1,TUBB4B,TUBA1B,EPRS,TUBA1C
Cortex	24hrs	ASC	7.06122e-12	2.50296	2.40717e-08	ChemicalGeneticPerturbations	MARTINEZ_RB1_TARGETS_UP	744	63	CAV2,DMD,AMD1,GJA1,JUNB,NEDD4,CAPRIN1,SIRPA,HNRNPAB,RAB6A,PLCB1,GNA13,CEBPG,CLDN10,BZW1,CCNL2,CTSB,CAPZB,BRD2,PSME4,APP,ERC1,ACTB,RIOK3,RTN4,BMP1,CCT2,SOX9,CCND2,PURB,TIMP1,CDKN1A,CCNL1,PFKFB3,ITGAV,HSPA9,NAV2,NHSL1,RBMS1,GHR,CFL2,DDR1,PMEPA1,THRSP,TCEA1,CD44,DDX3X,SLC48A1,ARCN1,GAPDH,WRN,CELF2,IP6K1,GJB6,NAP1L1,CHPT1,SGPL1,RASSF3,UBC,S100A10,FGFR2,EIF3A,SOX5
Cortex	24hrs	ASC	7.83128e-12	4.02367	2.66968e-08	ChemicalGeneticPerturbations	RAMALHO_STEMNESS_UP	744	31	HSPA4,GNL2,WDR43,CTTN,LAS1L,EIF3J,RABGGTB,UBE2D2,PSMD12,NOP56,ROCK2,ZNF281,SLC4A7,ITGB1,CDKN1A,NOP58,ACAT2,PSMD11,RSL1D1,EIF4G2,TJP1,CHD1,GHR,PTPN2,MPHOSPH10,ARCN1,TXNRD1,RSRC2,SLC38A2,LRRC58,EPRS
Cortex	24hrs	ASC	8.53563e-12	2.92351	2.9098e-08	ChemicalGeneticPerturbations	MITSIADES_RESPONSE_TO_APLIDIN_UP	744	48	JUN,EIF1,H3F3B,ID2,BDNF,NFE2L1,DDX18,KDM6B,GADD45A,SUPT6H,TAF1D,PPARGC1A,RABGGTB,RHOB,CTSB,BRD2,RORA,EZR,SQSTM1,RIOK3,LDLR,TRIB1,IFRD1,TIMP1,SLC3A2,IVD,CCNL1,PFKFB3,GADD45B,ATP1B3,RBMS1,KLF6,HBEGF,WSB1,RNF11,ZCCHC14,PPP1R15A,TMF1,PPP1R3C,PHLDA1,NFKBIA,GEM,HES1,RSRC2,TMSB4Y,TSC22D3,MCL1,DUSP6
Cortex	24hrs	ASC	8.93448e-12	7.21501	3.04576e-08	ChemicalGeneticPerturbations	PHONG_TNF_TARGETS_UP	744	17	JUN,FOS,JUNB,SDC4,ZFP36L2,LDLR,BHLHE40,LIF,CCNL1,KLF6,PTX3,EGR1,CD44,NFKBIA,GEM,BTG1,MCL1
Cortex	24hrs	ASC	9.24809e-12	2.87947	3.15267e-08	ChemicalGeneticPerturbations	CHARAFE_BREAST_CANCER_LUMINAL_VS_BASAL_DN	744	49	CAV2,HP1BP3,FKBP1A,RND3,OSMR,DMD,AMD1,SLC1A3,MFGE8,ANXA2,GPM6B,MSN,WDR1,SIRPA,ARPC2,GSTP1,SGK1,TMED5,EHBP1,SPRY2,TMEM30A,TUBB6,EMP1,DST,ZBTB38,ETF1,RIOK3,SLC16A1,BMP1,IL18,MAP4K4,ITGB1,TKT,ATP1B3,NAV2,RBMS1,STAT3,TUBA4A,ITM2C,CFL2,F3,PTPN2,MYL12A,CD44,PLAT,PHLDA1,GALNT2,WWTR1,S100A10
Cortex	24hrs	ASC	7.21414e-12	1.95464	3.35674e-08	GObp	GO_RESPONSE_TO_ENDOGENOUS_STIMULUS	744	106	JUN,CAV2,CPEB4,IGFBP2,IGFBP5,FKBP1A,FOS,PAQR8,H3F3B,GSTM3,GJA1,GNG5,EEF1A1,MFGE8,JUNB,MAGI2,EEF2,ADCY2,ANXA2,KCNQ1,NEDD4,AKAP6,AHCYL1,MSN,YWHAG,GABRB1,MT3,PRKAR1A,PDE4B,PPARGC1A,NRF1,RGMA,ADAMTS1,GSTP1,ID1,ANXA5,IQGAP1,SGK1,CTSB,NR1D1,RORA,PAQR7,UBB,SPRED1,APP,EZR,ROCK2,HNRNPK,PHIP,DNAJA1,HSP90AA1,PPP2R2A,HMGCS1,RRM2B,BMP1,SOX9,RHOQ,FGF14,TIMP1,FGFR1,PTK2,ITGB1,SOX6,SOCS3,NRIP1,GNAO1,PDE4D,TMEM10…
Cortex	24hrs	ASC	8.92796e-12	1.905	4.15418e-08	GObp	GO_INTRACELLULAR_SIGNAL_TRANSDUCTION	744	112	JUN,IGFBP5,CDC42,RND3,DMD,GRIN2C,MAPK8IP3,ADCY2,AKAP6,NRAS,SIRPG,GADD45A,RAB6A,CFL1,PLCB1,MT3,HSPB1,APOE,GNA13,PRKAR1A,PPP1R9A,ANK2,TULP4,IQGAP1,DGKB,SGK1,RHOB,PSMD12,UBB,NUPR1,PSME4,RGS6,DAB1,SPRED1,EZR,ROCK2,SQSTM1,ERC1,NISCH,SDCBP,PREX2,MYBBP1A,SOX9,TRIB1,IL18,NCAM1,RHOQ,FGF14,MAP4K4,FGFR1,PTK2,PRODH,SOCS3,PCNA,YWHAE,AKAP13,PDE4D,TMEM100,ADRA1A,LIF,TJP2,CDKN1A,ITGAV,SHISA5,PSMD11,TEAD1,AMOTL1,…
Cortex	24hrs	ASC	1.26363e-11	3.85412	4.3077e-08	ChemicalGeneticPerturbations	ZWANG_CLASS_3_TRANSIENTLY_INDUCED_BY_EGF	744	32	FOS,RND3,JUNB,IRF2BPL,KDM6B,RORA,SLC2A1,EZR,EMP1,TIPARP,ZBTB38,TRIB1,PURB,BHLHE40,SOCS3,TJP2,CCNL1,PFKFB3,ZFP36L1,RBMS1,HBEGF,TJP1,SLC20A1,PPP1R15A,FERMT2,PHLDA1,GEM,TXNRD1,ANO6,HES1,AFF1,MCL1
Cortex	24hrs	ASC	1.32149e-11	8.18509	4.50496e-08	ChemicalGeneticPerturbations	APRELIKOVA_BRCA1_TARGETS	744	15	ANXA5,APP,ROCK2,DNAJA1,HSP90AA1,FGFR1,TCEA1,ATP6AP1,DDX3X,DLG1,CKB,DDX21,TUBA1A,VIM,EPRS
Cortex	24hrs	ASC	1.32854e-11	1.83157	4.52898e-08	ChemicalGeneticPerturbations	GRAESSMANN_APOPTOSIS_BY_DOXORUBICIN_DN	744	122	CAV2,IGFBP2,IGFBP5,DDX39B,HP1BP3,PYGB,HSPA4,OSMR,NAA15,NDFIP1,GNG5,CTTN,NEDD4,CAPRIN1,ARGLU1,MSN,NRAS,THOC2,PHF3,EIF4A1,TAF1D,SRSF2,DHCR7,NRF1,CEBPG,TCP1,RABGGTB,ECI1,PRPF39,PER3,PHKA1,EIF5B,ST13,TUBB,FNDC4,PHF21A,TLCD1,NOP56,SPRED1,EMP1,ROCK2,DST,HNRNPK,PHIP,ARPC1B,ERC1,YWHAZ,HMGCS1,NISCH,TRIM2,ACTB,HLF,RBM25,ETF1,LDLR,MYBBP1A,GPHN,TRIB1,SRSF10,FARP1,PFKP,FGFR1,CYP51A1,SOX6,FZD2,NRIP1,GNAO1,CNTN…
Cortex	24hrs	ASC	1.39117e-11	2.40423	4.7425e-08	ChemicalGeneticPerturbations	BENPORATH_SOX2_TARGETS	744	66	IGFBP2,H3F3B,GJA1,HMG20A,HSP90AB1,EEF2,CAPRIN1,CAPZA2,CFL1,GNA13,PRKAR1A,GPC6,NKTR,SMG7,ID1,TUBB,TLE1,SPRED1,APP,ZNF281,HNRNPK,COPB1,PDPN,FGFR1,NUCKS1,SLC3A2,FZD2,TSC22D1,ZFP36L1,TIMP4,SAT1,ANP32B,AMOTL1,DTNA,STAT3,SKIL,EIF4G2,KCNN2,FTL,MORF4L1,CALM2,PTPN2,ZCCHC14,PPP1R15A,KAT6A,ALCAM,SLC7A5,RRS1,TXNRD1,OGT,GRID2,GADD45G,UBC,RSRC2,DDX21,SLC38A2,ATF4,TRA2A,VIM,BTG1,FGFR2,POU2F1,DUSP6,CBX5,SET,NUFI…
Cortex	24hrs	ASC	2.12739e-11	6.88705	7.25228e-08	ChemicalGeneticPerturbations	ZHONG_SECRETOME_OF_LUNG_CANCER_AND_ENDOTHELIUM	744	17	EEF2,YWHAG,SRSF2,SDC4,TUBB,YWHAZ,ACTB,PCNA,YWHAE,TKT,ENO1,CFL2,LDHA,GAPDH,VCP,VIM,TUBA1C
Cortex	24hrs	ASC	1.83567e-09	3.60963	9.17834e-08	Hallmark	HALLMARK_EPITHELIAL_MESENCHYMAL_TRANSITION	744	27	JUN,IGFBP2,CAP2,ID2,BDNF,GJA1,GADD45A,SDC4,LAMA2,PDLIM4,RHOB,DST,BMP1,TIMP1,ITGB1,SLC6A8,ITGAV,TNFRSF12A,GADD45B,SAT1,PTX3,NTM,PMEPA1,CD44,FERMT2,GEM,VIM
Cortex	24hrs	ASC	2.91004e-11	2.94183	9.92031e-08	ChemicalGeneticPerturbations	FOSTER_TOLERANT_MACROPHAGE_DN	744	45	FOS,RND3,WDR43,GJA1,JUNB,SLC39A14,PDE4B,SDC4,KTN1,TMEM30A,TUBB6,SPRED1,EZR,ZNF281,TIPARP,PHIP,PTPRD,SLC16A1,IL18,CCND2,SLC4A7,SOCS3,IL33,TJP2,CDKN1A,PFKFB3,ITGAV,TNFRSF12A,ENDOD1,SEPT11,STAT3,HBEGF,CHD1,PTX3,FRMD4A,PMEPA1,GSPT1,MED13L,KAT6A,ALCAM,GADD45G,AFF1,S100A10,TRA2A,CNN3
Cortex	24hrs	ASC	3.17632e-11	5.97672	1.08281e-07	ChemicalGeneticPerturbations	GALINDO_IMMUNE_RESPONSE_TO_ENTEROTOXIN	744	19	ACTG1,JUNB,GADD45A,STK40,RHOB,PDLIM7,UBB,SQSTM1,BHLHE40,SOCS3,TSC22D1,GADD45B,PCDH7,CD44,PHLDA1,GAPDH,NFKBIA,UBC,VMP1
Cortex	24hrs	ASC	3.31821e-11	2.32207	1.13118e-07	ChemicalGeneticPerturbations	ONKEN_UVEAL_MELANOMA_UP	744	68	SPARCL1,FKBP1A,RNF144A,CTTN,GPM6B,SAMD4A,MSN,SLC1A4,ARPC2,UBXN4,ANK2,SMARCA5,ZFP36L2,IQGAP1,SGK1,RHOB,CTSB,PHF21A,ADAM23,S100A13,PXDN,PSME4,SEC63,APP,EMP1,ANP32E,YWHAZ,ACTB,RBM25,TRIB1,CCND2,PFKP,CYP51A1,PTK2,PHACTR1,PCNA,AKAP13,TSC22D1,CDKN1A,PFKFB3,RBMS1,DOCK4,AZIN1,ZNF706,HSPH1,SYNCRIP,SLC20A1,LARP1,OXR1,PCDH7,JMJD1C,FRY,WSB1,TCEA1,PTPN2,GSPT1,EGR1,RBM28,GEM,ATP2B1,CELF2,OGT,S100A6,WWTR1,PAM,T…
Cortex	24hrs	ASC	3.34851e-11	4.27175	1.14151e-07	ChemicalGeneticPerturbations	UEDA_PERIFERAL_CLOCK	744	27	HSPA4,ID2,HNRNPAB,DHCR7,NR1D1,TUBB,TLE1,DNAJA1,SQSTM1,HSP90AA1,HMGCS1,BHLHE40,TSC22D1,POR,RBMS1,HSPH1,GLDC,CD9,TUBB2A,FERMT2,PPP1R3C,ALCAM,HMGCR,TUBA1A,S100A10,BTG1,TUBA1B
Cortex	24hrs	ASC	3.62578e-11	2.80836	1.23603e-07	ChemicalGeneticPerturbations	SENESE_HDAC1_TARGETS_UP	744	48	CPEB4,OSMR,CTTN,HSP90AB1,ACTR2,CAPRIN1,SLC39A14,RAB6A,SUPT6H,GNA13,PDLIM4,SMG7,IQGAP1,TPP1,PSME4,SPRED1,EZR,SQSTM1,ZBTB38,ANP32E,YWHAZ,SLC16A1,TRIB1,CCND2,ITGB1,TNFRSF12A,TEAD1,DOCK4,BDP1,PTX3,STIP1,CD44,DDX3X,SSR3,DLG1,IL1RAPL1,CDV3,PHLDA1,TM9SF3,NFKBIA,GEM,SF3B1,TM4SF1,TWF1,LRRC58,DCLK1,MCL1,EPRS
Cortex	24hrs	ASC	3.6984e-11	2.84318	1.26079e-07	ChemicalGeneticPerturbations	ROME_INSULIN_TARGETS_IN_MUSCLE_UP	744	47	EIF1,SPARCL1,TGOLN2,VDAC1,NDFIP1,MAT2A,NFE2L1,SUB1,AKAP6,CCT8,AHCYL1,NFIA,YWHAG,SLC39A14,RGMA,TSPAN7,ST13,TUBB,UBB,MSI2,PTMA,SDCBP,AKAP13,UBQLN1,PDE4D,ENDOD1,PSMD11,DTNA,EIF2S2,HEY1,LDHB,EIF3E,CFL2,UBE2R2,KIF5B,ARCN1,TM9SF3,VCP,CCT6A,TRA2B,PRDX6,BAG3,RSRC2,CNBP,PAM,VIM,SET
Cortex	24hrs	ASC	3.99563e-11	5.90723	1.36211e-07	ChemicalGeneticPerturbations	BURTON_ADIPOGENESIS_8	744	19	PLA2G7,BDNF,DSTN,MSN,SLC1A4,TMSB4X,ZFP36L2,ANXA5,PDLIM7,APP,EMP1,NCAM1,PDPN,ITGAV,RAB7A,SLC7A5,HMGCR,TUBA1A,LAMP2
Cortex	24hrs	ASC	4.05319e-11	2.70027	1.38173e-07	ChemicalGeneticPerturbations	DUTERTRE_ESTRADIOL_RESPONSE_24HR_DN	744	51	JUN,CPEB4,RND3,GSTM3,JUNB,YPEL5,ANXA2,SAMD4A,KDM6B,GADD45A,CTNND2,PCDH9,TMEM30A,TLE1,ROCK2,ZNF281,SQSTM1,S1PR3,TRIB1,DIO2,MAP4K4,SLC4A7,FZD2,TJP2,CDKN1A,ZFP36L1,ITGAV,RBMS1,PCDH1,KLF6,SKIL,PMEPA1,MYL12A,EGR1,CAB39,FERMT2,PPP1R3C,ALCAM,ATP2B1,ATP1B1,ANO6,EFR3B,TM4SF1,HES1,WWTR1,DCLK1,PAM,S100A10,TRA2A,TSC22D3,MCL1
Cortex	24hrs	ASC	4.11643e-11	3.25655	1.40329e-07	ChemicalGeneticPerturbations	GENTILE_UV_HIGH_DOSE_DN	744	38	RND3,AMD1,ID2,BDNF,MAT2A,SAMD4A,GADD45A,PHF3,PDE4B,ZFP36L2,ID1,RHOB,NUPR1,TLE1,AUTS2,TIPARP,PTK2,BHLHE40,ZMIZ1,FZD2,NRIP1,MRFAP1L1,TRIB2,SAT1,RBMS1,HBEGF,CHD1,PRKCD,TNFRSF1A,DDX3X,FERMT2,CDV3,GEM,TM4SF1,TSC22D3,MCL1,ZFAND5,NASP
Cortex	24hrs	ASC	4.46596e-11	4.22178	1.52245e-07	ChemicalGeneticPerturbations	ELVIDGE_HYPOXIA_UP	744	27	JUN,CSGALNACT1,IGFBP5,FOS,GJA1,SAMD4A,PGK1,SLC2A1,PXDN,TIPARP,DST,SOX9,PFKP,BHLHE40,PFKFB3,GADD45B,SAT1,DTNA,KLF6,HEY1,WSB1,DDR1,EGR1,PHLDA1,S100A6,PAM,TRA2A
Cortex	24hrs	ASC	4.57523e-11	2.79005	1.5597e-07	ChemicalGeneticPerturbations	CHARAFE_BREAST_CANCER_LUMINAL_VS_MESENCHYMAL_DN	744	48	CAV2,OSMR,DMD,ACTG1,BDNF,GJA1,MFGE8,ACTR2,ANXA2,MAP7D1,MSN,GADD45A,EIF4A1,GSTP1,ANXA5,SGK1,EHBP1,SPRY2,TUBB,PXDN,ARHGEF40,MAPRE1,TUBB6,SDCBP,RTN4,TOX,MAP4K4,PFKP,TIMP1,FZD2,SOCS3,ITGAV,TEAD1,LDHB,ITM2C,PTX3,CFL2,CD44,PLAT,PHLDA1,PDE7B,PICALM,GALNT2,CCDC50,NMT2,WWTR1,VIM,ARHGAP21
Cortex	24hrs	ASC	5.09412e-11	7.56735	1.73658e-07	ChemicalGeneticPerturbations	IKEDA_MIR1_TARGETS_UP	744	15	BDNF,NCL,ZFP36L2,SEC63,SPRED1,HNRNPK,ANP32E,YWHAZ,SYNCRIP,DDX3X,ARCN1,PICALM,SF3B1,CNN3,ARHGAP21
Cortex	24hrs	ASC	4.69707e-11	2.12123	2.18555e-07	GObp	GO_REGULATION_OF_ANATOMICAL_STRUCTURE_MORPHOGENESIS	744	81	CDC42,DDHD1,CDC42SE1,BDNF,SEMA4B,GNG5,CTTN,MAGI2,NEDD4,CAPRIN1,MSN,CFL1,MT3,HSPB1,ARPC2,APOE,GNA13,PPP1R9A,PPARGC1A,GPC6,LRRC4C,ID1,SGK1,RHOB,SEPT9,CAPZB,PSMD12,UBB,S100A13,TMBIM1,PSME4,DAB1,EZR,ROCK2,HNRNPK,PHIP,PTPRD,STRAP,SDCBP,LARP4,NACA,RTN4,SOX9,IFRD1,RHOQ,PDPN,FGFR1,PTK2,PTPRZ1,FZD2,AKAP13,TMEM100,LIF,TNFRSF12A,POR,PSMD11,CST3,SKIL,HEY1,INF2,F3,OMG,PPP1R15A,UBA52,DLG1,FERMT2,IL1RAPL1,TNIK,…
Cortex	24hrs	ASC	6.55658e-11	6.0922	2.23514e-07	ChemicalGeneticPerturbations	MALONEY_RESPONSE_TO_17AAG_DN	744	18	GJA1,SUB1,HNRNPAB,TMSB4X,EIF4A1,SRSF2,SNRPB,CLTB,SSB,PTGES3,PTMA,NACA,YWHAE,RPL35,CALM2,LDHA,PA2G4,WRN
Cortex	24hrs	ASC	5.47179e-11	2.40603	2.54602e-07	GObp	GO_ENZYME_LINKED_RECEPTOR_PROTEIN_SIGNALING_PATHWAY	744	62	JUN,CAV2,FKBP1A,FOS,CDC42,ACTG1,BDNF,SUB1,PTPRT,MAGI2,ACTR2,NRAS,PLCB1,HSPB1,ARPC2,RGMA,ARPC5,ID1,IQGAP1,UBB,SPRED1,ROCK2,TIPARP,PHIP,ARPC1B,HSP90AA1,PTPRD,ACTB,SDCBP,BMP1,SOX9,RHOQ,FGF14,FGFR1,PTK2,ITGB1,TMEM100,LIF,ITGAV,STAT3,SKIL,HBEGF,ERBB4,GHR,DDR1,STXBP4,PTPN2,ATP6AP1,MYL12A,EGR1,UBA52,EPS15,FERMT2,PLAT,HNRNPF,SGPL1,UBC,VIM,NRG3,FGFR2,ZFAND5,CLASP2
Cortex	24hrs	ASC	7.7629e-11	2.65299	2.64637e-07	ChemicalGeneticPerturbations	MARTORIATI_MDM4_TARGETS_FETAL_LIVER_DN	744	51	HP1BP3,CLIP3,BDNF,CTTN,ACTR2,IRF2BPL,DDX18,YWHAG,NRAS,UBXN4,APOE,CTTNBP2NL,NCL,ZFP36L2,EIF5B,ST13,FAM172A,SEC63,MAPRE1,ROCK2,LMO4,ARPC1B,ANP32E,RBM25,S1PR3,CKAP4,NAA50,NUCKS1,IVNS1ABP,NOLC1,EFHD2,GHR,ZCCHC14,SSR3,FERMT2,RBM28,RAB7A,ALCAM,FYTTD1,ATP2B1,SGPL1,HMGCR,RSRC2,DDX21,SLC38A2,LRRC58,FGFR2,ZFAND5,CBX5,EPRS,NUFIP2
Cortex	24hrs	ASC	7.80655e-11	2.62335	2.66125e-07	ChemicalGeneticPerturbations	ENK_UV_RESPONSE_KERATINOCYTE_UP	744	52	JUN,EIF1,FOS,RND3,AMD1,JUNB,HSP90AB1,ANXA2,GADD45A,CFL1,HSPB1,EIF4A1,APOE,SDC4,LAMA2,CEBPG,GSTP1,SNRPB,PDLIM4,SGK1,SPRY2,BRD2,UBB,DNAJA1,PPP2R2A,YWHAZ,TRIB1,IFRD1,CGGBP1,SLC3A2,SLC6A8,BPGM,TSC22D1,CDKN1A,GADD45B,ENO1,RPL35,HBEGF,MIF,PPP1R15A,TMF1,CKB,VCP,GEM,TXNRD1,FAU,EIF5,EIF1B,ATF4,PHKG1,BTG1,TUBB4B
Cortex	24hrs	ASC	7.84479e-11	2.36586	2.67429e-07	ChemicalGeneticPerturbations	SCHLOSSER_SERUM_RESPONSE_DN	744	63	EIF1,IGFBP5,HSPA4,RNF144A,SUB1,ACTR2,HNRNPA3,DSTN,SERBP1,SIRPA,PHF3,PRKAR1A,SMARCA5,KTN1,BZW1,PHLPP1,TMED5,PGK1,PSMD12,SEC63,PTMA,STRAP,ANP32E,SDCBP,RIOK3,RTN4,COPB1,LDLR,MRFAP1L1,HSPA5,SAT1,EIF2S2,AZIN1,GPM6A,SRP19,CALM2,CD9,TCEA1,RNF11,MYL12A,SCP2,EPS15,SEC61G,ARCN1,ADK,NAP1L1,OGT,SF3B1,TRA2B,HMGCR,TWF1,UBC,EIF5,ATF4,GLUL,TRA2A,LRIG1,INSIG1,FGFR2,ZFAND5,SET,CLASP2,LAMP2
Cortex	24hrs	ASC	5.87928e-11	2.58755	2.73563e-07	GObp	GO_REGULATION_OF_CELL_PROJECTION_ORGANIZATION	744	54	NEGR1,NRXN1,GFAP,CDC42,DMD,BDNF,SEMA4B,CTTN,MAGI2,NEDD4,CAPRIN1,CFL1,MT3,ARPC2,APOE,PPP1R9A,ADAMTS1,LRRC4C,ID1,SGK1,SEPT9,SPRY2,CAPZB,TMEM30A,DAB1,EZR,HNRNPK,HSP90AA1,PTPRD,RTN4,IFRD1,RHOQ,FGFR1,PTK2,ITGB1,PTPRZ1,LIF,CNTN1,TNFRSF12A,SKIL,PRKCD,ITM2C,NME1,GPM6A,OMG,IL1RAPL1,TNIK,INPP5F,GRID2,NLGN1,SLC39A12,VIM,CAMK1D,CLASP2
Cortex	24hrs	ASC	5.92794e-11	2.8051	2.75827e-07	GObp	GO_POSTTRANSCRIPTIONAL_REGULATION_OF_GENE_EXPRESSION	744	47	EIF1,CPEB4,IGFBP5,DDX39B,EEF2,CAPRIN1,SERBP1,SAMD4A,HSPB1,EIF4A1,EIF3J,ZFP36L2,EIF5B,PSMD12,UBB,PSME4,APP,YWHAZ,ETF1,EIF5A,EIF5AL1,DIO2,ZFP36L1,MTPN,PSMD11,ZNF706,STAT3,EIF4G2,SYNCRIP,PRKCD,LARP1,EIF3E,PA2G4,DDX3X,PPP1R15A,UBA52,GAPDH,PASK,PSMD2,UBC,EIF5,EIF1B,ATF4,PSMB5,EIF3A,SET,EPRS
Cortex	24hrs	ASC	8.53491e-11	16.4541	2.90955e-07	ChemicalGeneticPerturbations	FU_INTERACT_WITH_ALKBH8	744	8	CCT8,TCP1,CCT5,HSP90AA1,CCT2,CCT3,CCT7,CCT6A
Cortex	24hrs	ASC	8.81203e-11	3.29646	3.00402e-07	ChemicalGeneticPerturbations	HELLER_HDAC_TARGETS_DN	744	36	GJA1,NFE2L1,GPM6B,GADD45A,HNRNPAB,SLC1A4,CEBPG,NOP14,RORA,TPP1,NOP56,AUTS2,ZBTB38,EIF5A,CCND2,PFKP,SLC3A2,ZMIZ1,PDE4D,HSPA9,HSPA5,EIF4G2,HSPH1,LARP1,CD44,PPP1R15A,SLC7A5,RRS1,CELF2,OGT,BAG3,EIF5,ATF4,LSAMP,DUSP6,SET
Cortex	24hrs	ASC	9.20431e-11	2.88351	3.13775e-07	ChemicalGeneticPerturbations	REN_ALVEOLAR_RHABDOMYOSARCOMA_DN	744	44	CAV2,OSMR,RHBDF1,BDNF,PITPNA,GJA1,CTTN,MFGE8,ACTR2,ANXA2,MSN,WDR1,SLC39A14,ARPC5,ANXA5,IQGAP1,CTSB,TMED5,CAPZB,CLTB,TPP1,S100A13,EMP1,ARPC1B,BMP1,TIMP1,FZD2,ITGAV,TNFRSF12A,ENDOD1,CST3,KLF6,PTX3,RAB5C,TNFRSF1A,ATP6AP1,SCP2,PLAT,S100A6,TM4SF1,BAG3,PAM,S100A10,LAMP2
Cortex	24hrs	ASC	9.87757e-11	4.51909	3.36726e-07	ChemicalGeneticPerturbations	GROSS_HYPOXIA_VIA_ELK3_AND_HIF1A_UP	744	24	DDX39B,FOS,CDC42SE1,ANXA2,SDC4,SGK1,SPRY2,PGK1,RORA,SLC2A1,PFKFB3,SAT1,KLF6,HBEGF,JMJD1C,WSB1,EGR1,CD44,PHLDA1,NFKBIA,NAP1L1,TM4SF1,ZBTB20,ACAP2
Cortex	24hrs	ASC	1.01292e-10	2.0885	3.45305e-07	ChemicalGeneticPerturbations	NUYTTEN_EZH2_TARGETS_UP	744	81	JUN,CAP2,FKBP1A,CDC42,RND3,CDC42SE1,SLC1A3,ID2,BDNF,GJA1,NFE2L1,CTTN,SUB1,JUNB,ANXA2,KCNQ1,WDR1,GADD45A,GNA13,STK40,ZFP36L2,ANXA5,SGK1,CTSB,TMED5,NR1D1,UBXN2A,PAQR7,SLC2A1,SPRED1,APP,DNAJA1,SQSTM1,YWHAZ,HMGCS1,RBM25,MYBBP1A,CKAP4,RHOQ,BHLHE40,CDKN1A,ZFP36L1,HSPA5,ENDOD1,SAT1,ENO1,KLF6,SRXN1,EFHD2,GHR,ITM2C,PTX3,PCDH7,ARL2BP,LDHA,FMN2,ATP6AP1,TUBB2A,EGR1,CD44,CAB39,SCP2,FERMT2,PLAT,IL1RAPL1,TNIK,F…
Cortex	24hrs	ASC	1.0471e-10	5.94177	3.56957e-07	ChemicalGeneticPerturbations	HARRIS_HYPOXIA	744	18	JUN,IGFBP2,FOS,PGK1,SLC2A1,PFKP,BHLHE40,TXN,CDKN1A,SAT1,ENO1,FTL,LDHA,F3,MIF,GAPDH,HK1,VIM
Cortex	24hrs	ASC	1.15544e-10	4.48749	3.93889e-07	ChemicalGeneticPerturbations	DANG_MYC_TARGETS_UP	744	24	HSPA4,ID2,MAT2A,DDX18,NRAS,EIF4A1,SRSF2,NCL,SNRPB,CCT5,EMP1,CEBPZ,PTMA,CCND2,TXN,PCNA,HSPA9,ENO1,GNL3,NME1,LDHA,PA2G4,GAPDH,NAP1L1
Cortex	24hrs	ASC	9.26406e-11	2.20772	4.31057e-07	GObp	GO_NEGATIVE_REGULATION_OF_CELL_DEATH	744	72	JUN,CPEB4,NAA15,BDNF,CTTN,HSP90AB1,SYCP2,CFL1,MT3,HSPB1,APOE,NES,PPARGC1A,NCL,GSTP1,STK40,DDB1,ID1,ANXA5,SGK1,CTSB,SPRY2,UBB,TMBIM1,TLE1,HNRNPK,PHIP,DNAJA1,SQSTM1,YWHAZ,RRM2B,NACA,SOX9,ZFPM2,MAP4K4,TIMP1,PTK2,ITGB1,TXN,SOCS3,YWHAE,CDKN1A,ITGAV,HSPA9,HSPA5,POR,IVNS1ABP,GRIK2,STAT3,HSPH1,PRKCD,ERBB4,OXR1,FMN2,MIF,CD44,PA2G4,DDX3X,PPP1R15A,UBA52,TMF1,NFKBIA,OGT,BAG3,HMGCR,UBC,ATF4,TSC22D3,MCL1,CAMK1…
Cortex	24hrs	ASC	9.89257e-11	4.69445	4.60301e-07	GObp	GO_PROTEIN_STABILIZATION	744	23	NAA15,HSP90AB1,CCT8,MT3,PPARGC1A,ANK2,TCP1,CCT5,GTPBP4,NAPG,HSP90AA1,CCT2,CCT3,CDKN1A,ATP1B3,PRKCD,CCT7,STXBP4,GAPDH,CCT6A,ATP1B1,BAG3,LAMP2
Cortex	24hrs	ASC	1.47902e-10	1.73553	5.04198e-07	ChemicalGeneticPerturbations	PILON_KLF1_TARGETS_DN	744	128	HP1BP3,FKBP1A,CDC42,HSPA4,CDC42SE1,VDAC1,ID2,WDR43,PITPNA,SUB1,ACTR2,HNRNPA3,SMPDL3A,ALDH6A1,CAPRIN1,SERBP1,CCT8,MSN,WDR1,KDM6B,NRAS,USP24,MIDN,HNRNPAB,CAPZA2,GNA13,RWDD1,SNRPB,ZFP36L2,SMG7,NOP14,IQGAP1,UBE2D2,ST13,CAPZB,BRD2,KDSR,FAM172A,ZDHHC20,MAPRE1,NOP56,LUC7L,VAPA,PTGES3,HNRNPK,ARPC1B,STRAP,PPP2R2A,ANP32E,RIOK3,GPHN,CKAP4,NAA50,CCND2,IFRD1,PURB,SLC4A7,CGGBP1,CDK11B,NUCKS1,ZMIZ1,CCT3,YWHAE,A…
Cortex	24hrs	ASC	1.49112e-10	2.84172	5.08322e-07	ChemicalGeneticPerturbations	MOHANKUMAR_TLX1_TARGETS_UP	744	44	AMD1,GNL2,GSTM3,MAT2A,EEF1A1,CCT8,RAB6A,SMG7,RHOB,CTSB,TUBB,SEC63,HNRNPK,ARPC1B,SQSTM1,ANP32E,COPB1,NAA50,ST3GAL4,RHOQ,BHLHE40,ZMIZ1,PCNA,ATP1B3,NOLC1,EIF4G2,SLC20A1,LDHB,FRMD4A,LDHA,ADIPOR1,GATM,ATP6AP1,MED13L,KCNK2,ARCN1,PICALM,CCT6A,ATP2B1,ZNF839,EIF5,PSMB5,TUBB4B,TUBA1C
Cortex	24hrs	ASC	1.55485e-10	2.15535	5.30048e-07	ChemicalGeneticPerturbations	JOHNSTONE_PARVB_TARGETS_3_DN	744	74	JUN,HP1BP3,CDC42SE1,NAA15,BDNF,WDR43,CTTN,SUB1,IRF2BPL,ANXA2,ALDH6A1,ARGLU1,TAF1D,SMARCA5,TCP1,NKTR,KTN1,PER3,ID1,EIF5B,PGK1,UBXN2A,GTPBP4,BRD2,PSMD12,TIPARP,PTMA,ANP32E,SNRNP70,NAA50,IFRD1,PTK2,NUCKS1,SLC3A2,SOCS3,PCNA,PFKFB3,TPRKB,MTPN,NOP58,ATP1B3,IVNS1ABP,RBMS1,EEF1D,HBEGF,TJP1,SYNCRIP,BDP1,OXR1,CFL2,SRP19,ARHGEF12,ARL2BP,TCEA1,TUBB2A,SSR3,TMF1,FERMT2,KAT6A,SLC7A5,ADK,ATP1B1,HOOK3,OGT,TRA2B,T…
Cortex	24hrs	ASC	1.68555e-10	3.35458	5.74603e-07	ChemicalGeneticPerturbations	MCBRYAN_PUBERTAL_BREAST_4_5WK_UP	744	34	PLA2G7,JUN,IGFBP2,FOS,RND3,ID2,WDR43,MFGE8,SDC4,CLDN10,PDLIM4,MMD2,SLC2A1,EZR,SOX9,TIMP1,IL33,CNTN1,TNFRSF12A,SAT1,RBP1,NHSL1,HEY1,TUBA4A,PTX3,F3,DDR1,CD9,PLAT,TMEM56,FGFR2,DUSP6,CNN3,ARHGAP21
Cortex	24hrs	ASC	1.73439e-10	3.28361	5.91252e-07	ChemicalGeneticPerturbations	NAKAMURA_TUMOR_ZONE_PERIPHERAL_VS_CENTRAL_UP	744	35	CAV2,RND3,NAA15,ID2,BDNF,GPM6B,HNRNPAB,ADAMTS1,UBE2D2,PSMD12,TRAPPC4,EZR,EMP1,HSP90AA1,CCT2,NCAM1,TPRKB,PSMD11,SLC15A2,SRXN1,SYNCRIP,TUBA4A,INF2,NME1,F3,PMEPA1,TUBB2A,STAG1,PSMD2,EIF5,TUBA1A,CNN3,TUBB4B,TUBA1B,TUBA1C
Cortex	24hrs	ASC	1.43398e-10	3.02124	6.67229e-07	GObp	GO_REGULATION_OF_CELLULAR_AMIDE_METABOLIC_PROCESS	744	40	EIF1,CPEB4,IGFBP5,DDX39B,EEF2,CAPRIN1,SAMD4A,HSPB1,EIF4A1,APOE,EIF3J,EIF5B,APP,ETF1,EIF5A,EIF5AL1,DIO2,BPGM,ZFP36L1,MTPN,SAMD8,ZNF706,STAT3,EIF4G2,SYNCRIP,PRKCD,LARP1,EIF3E,TNFRSF1A,PA2G4,DDX3X,PPP1R15A,GAPDH,PICALM,PASK,EIF5,EIF1B,ATF4,EIF3A,EPRS
Cortex	24hrs	ASC	2.07009e-10	6.48193	7.05693e-07	ChemicalGeneticPerturbations	DIRMEIER_LMP1_RESPONSE_EARLY	744	16	JUN,EIF1,EEF1A1,JUNB,HSP90AB1,EEF2,KDM6B,HMGCS1,ACTB,GADD45B,KLF6,EGR1,PPP1R15A,NFKBIA,INSIG1,MCL1
Cortex	24hrs	ASC	2.18708e-10	2.66824	7.45576e-07	ChemicalGeneticPerturbations	LIU_PROSTATE_CANCER_DN	744	48	CAV2,DMD,H3F3B,GSTM3,GJA1,ANXA2,GPM6B,SLC14A1,HSPB1,ANK2,GSTP1,GPC6,PCDH9,PDLIM4,PER3,ID1,CTSB,ARHGEF40,TUBB6,DST,HLF,PREX2,NCAM1,CCND2,FGFR1,IL33,TMEM100,NAV2,RBP1,DTNA,RBMS1,TUBA4A,LDHB,PCDH7,CFL2,GATM,ZCCHC14,FERMT2,PHLDA1,MRAS,CCDC50,S100A6,TUBA1A,LONRF3,TSC22D3,LSAMP,FGFR2,RHOJ
Cortex	24hrs	ASC	2.32755e-10	2.54647	7.93461e-07	ChemicalGeneticPerturbations	FLECHNER_BIOPSY_KIDNEY_TRANSPLANT_REJECTED_VS_OK_DN	744	52	IGFBP2,IGFBP5,CAP2,HSPA4,USP14,VDAC1,SMPDL3A,ALDH6A1,DSTN,SERBP1,AHCYL1,SLC39A14,HSPB1,PRKAR1A,CYP4F2,ANK2,CLDN10,RABGGTB,ECI1,GPC5,CRYM,TMED5,ST13,PGK1,CLTB,AUTS2,PTGES3,DST,SLC5A3,PTPRD,STRAP,TRIM2,LARP4,RTN4,KBTBD11,TXN,SLC3A2,YWHAE,TSC22D1,PSMD11,ERBB4,GLDC,CD9,GATM,ESD,TUBB2A,DDX3X,SCP2,SLC4A4,WWTR1,NARS,CLASP2
Cortex	24hrs	ASC	2.4233e-10	2.3794	8.26101e-07	ChemicalGeneticPerturbations	CASORELLI_ACUTE_PROMYELOCYTIC_LEUKEMIA_DN	744	59	HSPA4,VDAC1,HSP90AB1,ACTR2,HNRNPA3,SERBP1,DDX18,HNRNPAB,CAPZA2,DHCR7,EIF1AY,SNRPB,ECI1,CCT5,EIF5B,PGK1,TUBB,TMBIM1,LUC7L,ROCK2,HNRNPK,LMO4,SQSTM1,HSP90AA1,HMGCS1,ACTB,EIF5A,LDLR,SNRNP70,CKAP4,PFKP,CYP51A1,PTK2,NRIP1,LIF,TJP2,HSPA9,ACAT2,ENO1,IVNS1ABP,NOLC1,EIF2S2,CCT7,LDHB,NME1,LDHA,STIP1,TUBB2B,LRRFIP2,GAPDH,PICALM,VCP,HNRNPF,HMGCR,GLUL,PSMB5,INSIG1,NASP,EPRS
Cortex	24hrs	ASC	1.78654e-10	2.33816	8.31276e-07	GObp	GO_HEAD_DEVELOPMENT	744	62	NRXN1,CDC42,H3F3B,ID2,MAPK8IP3,CCDC141,KDM6B,NDRG2,PLCB1,MT3,NES,BCAN,PPARGC1A,PCDH9,ID1,CTNNA2,RORA,HES5,DAB1,APP,TIPARP,HNRNPK,HMGCS1,ACTB,RTN4,FGFR1,SLC6A11,ITGB1,PTPRZ1,YWHAE,GNAO1,CNTN1,PFKFB3,MTPN,HSPA5,KIRREL3,ANP32B,ERBB4,NME1,CALM2,WNT7B,NCOA1,LDHA,CD9,CKB,MACROD2,PHLDA1,ARCN1,WRN,ATP2B1,HOOK3,OGT,GRID2,TRA2B,SGPL1,BAG3,HES1,SLC38A2,DCLK1,NRG3,FGFR2,ZFAND5
Cortex	24hrs	ASC	2.60837e-10	3.71005	8.89195e-07	ChemicalGeneticPerturbations	KIM_WT1_TARGETS_12HR_DN	744	29	RND3,BDNF,DDX18,HNRNPAB,TAF1D,SRSF2,RWDD1,ARHGEF40,NOP56,EZR,RBM25,KBTBD11,MYBBP1A,IL18,HAPLN1,ZFP36L1,GADD45B,NOLC1,SYNCRIP,GNL3,PMEPA1,CD44,CDV3,PHLDA1,RRS1,ADK,TRA2B,MCL1,ZFAND5
Cortex	24hrs	ASC	2.79085e-10	2.78784	9.51399e-07	ChemicalGeneticPerturbations	YAGI_AML_WITH_INV_16_TRANSLOCATION	744	44	CAP2,OSMR,DMD,RHBDF1,CLIP3,EEF1A1,HNRNPAB,THOC2,HSPB1,SDC4,RABGGTB,ACSL6,DGKB,EIF5B,SPRY2,EZR,EMP1,HNRNPK,PTMA,PPP2R2A,RBM25,ETF1,NACA,CCND2,PFKP,TIMP1,SLC4A7,SLC6A11,AKAP13,TSC22D1,DTNA,DOCK4,CHD1,ERBB4,SRP19,ARHGEF12,CD9,TUBB2B,ZCCHC14,ATP2B1,UBC,S100A10,VIM,LGI1
Cortex	24hrs	ASC	3.26075e-10	2.47235	1.11159e-06	ChemicalGeneticPerturbations	SPIELMAN_LYMPHOBLAST_EUROPEAN_VS_ASIAN_DN	744	54	JUN,TGOLN2,USP14,VDAC1,SLC12A2,PITPNA,HSP90AB1,ACTR2,ANXA2,CAPRIN1,PDE4B,SNRPB,ARPC5,DDB1,RHOB,UBE2D2,ST13,GTPBP4,PSMD12,MAPRE1,DNAJA1,SQSTM1,PPP2R2A,YWHAZ,ETF1,RIOK3,CCT2,GPHN,CKAP4,RHOQ,PFKP,CGGBP1,PSMD11,NOLC1,EIF2S2,AZIN1,STAT3,KLF6,MED21,ARL2BP,KIF5B,GATM,SCP2,KAT6A,PICALM,CD63,TXNRD1,SF3B1,DDX21,NMT2,EIF5,SLC38A2,MCL1,TFG
Cortex	24hrs	ASC	2.69056e-10	1.99606	1.25192e-06	GObp	GO_POSITIVE_REGULATION_OF_CELLULAR_COMPONENT_ORGANIZATION	744	86	JUN,NEGR1,NRXN1,CDC42,DDHD1,DMD,CLIP3,BDNF,CTTN,MFGE8,MAGI2,ACTR2,ANXA2,DSTN,CAPRIN1,CCT8,MSN,YWHAG,WDR1,PLCB1,ARPC2,APOE,NES,PPP1R9A,PPARGC1A,SDC4,ADAMTS1,TCP1,ARPC5,DDB1,ID1,CCT5,SGK1,SEPT9,ACTR3C,TMEM30A,AUTS2,EZR,ROCK2,HNRNPK,PHIP,ARPC1B,HSP90AA1,PTPRD,YWHAZ,SDCBP,EIF5A,EIF5AL1,CCT2,SOX9,RHOQ,FGFR1,ITGB1,PTPRZ1,NRXN3,CCT3,YWHAE,LIF,CNTN1,ITGAV,TNFRSF12A,ACTR3B,SKIL,PRKCD,CCT7,RANBP1,GNL3,PTX3…
Cortex	24hrs	ASC	2.94717e-10	1.7507	1.37132e-06	GObp	GO_CELLULAR_RESPONSE_TO_ORGANIC_SUBSTANCE	744	121	JUN,CAV2,CPEB4,IGFBP2,IGFBP5,FKBP1A,FOS,OSMR,PAQR8,GNG5,EEF1A1,JUNB,MAGI2,HSP90AB1,EEF2,ADCY2,KCNQ1,NEDD4,AKAP6,AHCYL1,MSN,YWHAG,PLCB1,GABRB1,MT3,HSPB1,PRKAR1A,PDE4B,PPARGC1A,RGMA,NCL,ADAMTS1,GSTP1,LRRC4C,ID1,ANXA5,IQGAP1,SGK1,CTSB,NR1D1,RORA,PAQR7,TPP1,PSMD12,UBB,PSME4,SEC63,SPRED1,APP,EZR,ROCK2,TIPARP,HNRNPK,PHIP,DNAJA1,HMGCS1,SLC16A1,BMP1,SOX9,IL18,NCAM1,RHOQ,FGF14,FGFR1,PTK2,ITGB1,SOX6,SOCS3,…
Cortex	24hrs	ASC	3.08595e-10	2.81797	1.43589e-06	GObp	GO_REGULATION_OF_NEURON_PROJECTION_DEVELOPMENT	744	43	NEGR1,GFAP,DMD,BDNF,SEMA4B,CTTN,MAGI2,NEDD4,CAPRIN1,CFL1,MT3,APOE,PPP1R9A,ADAMTS1,LRRC4C,ID1,SGK1,TMEM30A,DAB1,HNRNPK,PTPRD,RTN4,IFRD1,FGFR1,PTK2,ITGB1,PTPRZ1,LIF,CNTN1,TNFRSF12A,SKIL,ITM2C,NME1,OMG,IL1RAPL1,TNIK,INPP5F,GRID2,NLGN1,SLC39A12,VIM,CAMK1D,CLASP2
Cortex	24hrs	ASC	5.00766e-10	4.52489	1.70711e-06	ChemicalGeneticPerturbations	ELVIDGE_HYPOXIA_BY_DMOG_UP	744	22	JUN,CSGALNACT1,IGFBP5,FOS,GJA1,SAMD4A,PGK1,SLC2A1,DST,SOX9,PFKP,BHLHE40,PFKFB3,SAT1,DTNA,KLF6,HEY1,WSB1,EGR1,PHLDA1,S100A6,PAM
Cortex	24hrs	ASC	3.49127e-08	3.65364	1.74563e-06	Hallmark	HALLMARK_APOPTOSIS	744	22	JUN,GADD45A,HSPB1,RHOB,APP,EMP1,DNAJA1,SQSTM1,ETF1,IL18,CCND2,TIMP1,PTK2,CDKN1A,TNFRSF12A,GADD45B,SAT1,SLC20A1,CD44,PLAT,MCL1,AIFM3
Cortex	24hrs	ASC	5.1305e-10	4.19419	1.74899e-06	ChemicalGeneticPerturbations	LU_AGING_BRAIN_DN	744	24	FAM49A,NRXN1,CAP2,FKBP1A,TGOLN2,VDAC1,PITPNA,MAT2A,RAB6A,GRIA1,ANK2,BRD2,CLTB,NAPG,YWHAZ,SRSF10,YWHAE,PDE4D,CNTN1,AZIN1,TUBA4A,DDX3X,OGT,CBX5
Cortex	24hrs	ASC	3.94279e-10	2.5097	1.83458e-06	GObp	GO_REGULATION_OF_NEURON_DIFFERENTIATION	744	52	NEGR1,GFAP,DMD,ID2,BDNF,SEMA4B,CTTN,HMG20A,MAGI2,NEDD4,CAPRIN1,YWHAG,CFL1,MT3,APOE,PPP1R9A,ADAMTS1,MMD2,LRRC4C,ID1,SGK1,HES5,TMEM30A,DAB1,APP,HNRNPK,PTPRD,RTN4,SOX9,IFRD1,FGFR1,PTK2,ITGB1,PTPRZ1,LIF,CNTN1,TNFRSF12A,SKIL,ITM2C,NME1,NCOA1,OMG,IL1RAPL1,TNIK,INPP5F,GRID2,HES1,NLGN1,SLC39A12,VIM,CAMK1D,CLASP2
Cortex	24hrs	ASC	5.95662e-10	2.72331	2.03061e-06	ChemicalGeneticPerturbations	GRYDER_PAX3FOXO1_TOP_ENHANCERS	744	44	FAM49A,HP1BP3,TGOLN2,ACTG1,WDR43,MAT2A,SMPDL3A,SAMD4A,ARPC2,TSPAN7,DDB1,PXDN,TLE1,MSI2,AUTS2,APP,HNRNPK,CEBPZ,YWHAZ,ACTB,RRM2B,NACA,CADM2,RHOQ,ITGB1,ZFP36L1,POR,RSL1D1,NOLC1,RBMS1,HSPH1,EFHD2,NCOA1,CD9,MIF,LRRFIP2,MED13L,CELF2,TXNRD1,GALNT2,SLC38A2,LRIG1,MAGI1,TSC22D2
Cortex	24hrs	ASC	7.23699e-10	5.34759	2.46709e-06	ChemicalGeneticPerturbations	HILLION_HMGA1_TARGETS	744	18	FOS,ID2,HSP90AB1,EEF2,NRAS,CFL1,GABRB1,HSPB1,NEO1,ID1,SLC6A11,PCNA,STAT3,GHR,NME1,MIF,VCP,NFKBIA
Cortex	24hrs	ASC	8.37914e-10	5.61167	2.85645e-06	ChemicalGeneticPerturbations	MUNSHI_MULTIPLE_MYELOMA_UP	744	17	JUN,FOS,EEF1A1,ANXA2,DDX18,UBB,NACA,HSPA5,EIF4G2,LDHB,CALM2,CDV3,GAPDH,CD63,NFKBIA,UBC,MCL1
Cortex	24hrs	ASC	6.37708e-10	2.14148	2.96725e-06	GObp	GO_NEURON_DIFFERENTIATION	744	70	JUN,NRXN1,GFAP,CDC42,SLC1A3,ID2,BDNF,GJA1,CTTN,MAPK8IP3,NEDD4,NRAS,GABRB1,THOC2,APOE,CTNND2,PPP1R9A,NEO1,SDC4,LAMA2,ID1,CTNNA2,IQGAP1,SGK1,RORA,HES5,UBB,TRAPPC4,DAB1,VAPA,APP,EZR,LMO4,PTPRD,RTN4,PREX2,SOX9,NCAM1,FARP1,SLC4A7,FGFR1,PTK2,ITGB1,PTPRZ1,FZD2,NRXN3,GNAO1,LIF,CNTN1,MTPN,KIRREL3,STAT3,ERBB4,ITM2C,FRY,GPM6A,WNT7B,NTM,KIF5B,OMG,IL1RAPL1,PHLDA1,ALCAM,GRID2,S100A6,HES1,DCLK1,NLGN1,LGI1,FGFR2
Cortex	24hrs	ASC	8.92592e-10	3.95532	3.04285e-06	ChemicalGeneticPerturbations	MCBRYAN_PUBERTAL_TGFB1_TARGETS_UP	744	25	GJA1,MFGE8,SIRPA,SLC2A1,BMP1,SOX9,BHLHE40,BPGM,NRIP1,TSC22D1,TJP2,CDKN1A,ITGAV,SAT1,TUBA4A,RAB5C,F3,PLAT,PICALM,GALNT2,TRA2B,S100A6,HES1,HK1,CNN3
Cortex	24hrs	ASC	9.27567e-10	3.61673	3.16208e-06	ChemicalGeneticPerturbations	KARLSSON_TGFB1_TARGETS_DN	744	28	NDFIP1,ID2,NFIA,NDRG2,SUPT6H,CCNL2,ID1,CTSB,EZR,DNAJA1,SLC16A1,PCNA,ZFP36L1,CST3,STAT3,NME1,GPM6A,SYT11,RNF11,SCP2,SLC48A1,PLAT,ALCAM,CELF2,WWTR1,ZBTB20,GLUL,LAMP2
Cortex	24hrs	ASC	6.92173e-10	1.82105	3.22068e-06	GObp	GO_PROTEIN_COMPLEX_SUBUNIT_ORGANIZATION	744	104	CAV2,NRXN1,GFAP,HP1BP3,FKBP1A,CDC42,HSPA4,DMD,H3F3B,GJA1,CTTN,MAGI2,ACTR2,HBA2,HBA1,ANXA2,SBDS,DSTN,CCT8,CAPZA2,CFL1,ARPC2,TMSB4X,PPP1R9A,GRIA1,PPARGC1A,SMARCA5,TCP1,ARPC5,ANXA5,SGK1,SEPT9,ST13,ACTR3C,BRD2,TUBB,HES5,SLC2A1,TRAPPC4,NAPG,NUPR1,PSME4,TLE1,EZR,ARPC1B,SQSTM1,HSP90AA1,ANP32E,ETF1,RTN4,CCT2,SOX9,MRPS6,PTK2,ITGB1,KCND2,FZD2,PHACTR1,CCT3,SEPT11,PSMD11,ANP32B,ACTR3B,SKIL,MRPL52,RANBP1,FRY,…
Cortex	24hrs	ASC	1.00854e-09	7.39561	3.43811e-06	ChemicalGeneticPerturbations	KHETCHOUMIAN_TRIM24_TARGETS_UP	744	13	FOS,JUNB,SAMD4A,APP,EMP1,CDKN1A,ITGAV,RBP1,HBEGF,EGR1,CD44,VIM,FGFR2
Cortex	24hrs	ASC	8.38411e-10	2.36544	3.90113e-06	GObp	GO_REGULATION_OF_GROWTH	744	56	IGFBP2,IGFBP5,DDX39B,CDC42,H3F3B,BDNF,GJA1,SEMA4B,CTTN,AKAP6,PLCB1,MT3,APOE,SGK1,HEPACAM,APP,EZR,HNRNPK,SQSTM1,SDCBP,NACA,RTN4,IFRD1,CDK11B,FGFR1,PTK2,SOCS3,CDKN1A,TKT,MTPN,TNFRSF12A,FAM107A,POR,ENO1,STAT3,MBD5,HBEGF,ERBB4,GHR,MORF4L1,CSPG5,DDR1,ADIPOR1,DDX3X,KCNK2,CDK11A,WRN,CHPT1,SGPL1,LGI1,BTG1,NRG3,AGT,FGFR2,DUSP6,CLASP2
Cortex	24hrs	ASC	1.15726e-09	4.18349	3.94511e-06	ChemicalGeneticPerturbations	PODAR_RESPONSE_TO_ADAPHOSTIN_UP	744	23	JUN,RND3,ID2,NFE2L1,YPEL5,GADD45A,HSPB1,CEBPG,SQSTM1,TRIB1,IFRD1,SLC3A2,ZFP36L1,SAT1,KLF6,TUBB2A,CD44,PPP1R15A,PHLDA1,TUBA1A,SLC38A2,ATF4,ZFAND5
Cortex	24hrs	ASC	1.19795e-09	3.18539	4.08381e-06	ChemicalGeneticPerturbations	FOURNIER_ACINAR_DEVELOPMENT_LATE_2	744	33	DDX39B,RND3,ACTG1,SAMD4A,SNRPB,ANXA5,EIF5B,SPRY2,PGK1,PDLIM7,SSB,PTGES3,PPP2R2A,ANP32E,ACTB,RBM25,LARP4,LDLR,CCT2,SRSF10,MAP4K4,CYP51A1,TXN,TPRKB,TNFRSF12A,NOLC1,RANBP1,WSB1,CALM2,LDHA,PHLDA1,DUSP6,NASP
Cortex	24hrs	ASC	9.14893e-10	1.77607	4.257e-06	GObp	GO_REGULATION_OF_INTRACELLULAR_SIGNAL_TRANSDUCTION	744	110	JUN,CAV2,IGFBP5,FKBP1A,CDC42,DMD,NDFIP1,GJA1,MAGI2,MAPK8IP3,NEDD4,AKAP6,OTUD7A,GADD45A,NDRG2,PLCB1,MT3,HSPB1,APOE,GSTP1,STK40,MMD2,LRRC4C,ID1,PHLPP1,RHOB,DDRGK1,DOT1L,SPRY2,RORA,HES5,UBB,S100A13,ARHGEF40,TLE1,DAB1,SPRED1,VAPA,EZR,HNRNPK,DNAJA1,SQSTM1,SDCBP,RRM2B,PREX2,BMP1,SOX9,TRIB1,IL18,PSD2,RHOQ,FARP1,MAP4K4,FGFR1,PTK2,ITGB1,TXN,SOCS3,AKAP13,UBQLN1,PDE4D,TMEM100,ADRA1A,LIF,SHISA5,TRIB2,GADD45B…
Cortex	24hrs	ASC	1.28873e-09	3.31551	4.39327e-06	ChemicalGeneticPerturbations	ZHENG_GLIOBLASTOMA_PLASTICITY_UP	744	31	PLA2G7,SPARCL1,RND3,PAQR8,MFGE8,GABRB1,NES,SDC4,PPP2R2B,NUPR1,TLE1,PTPRD,TRIM2,CADM2,CCND2,PDPN,PFKP,SLC6A11,GNAO1,TIMP4,TRIB2,RBP1,TUBA4A,EFHD2,GPM6A,F3,THRSP,OMG,RASSF3,DUSP6,NASP
Cortex	24hrs	ASC	1.30568e-09	3.56506	4.45106e-06	ChemicalGeneticPerturbations	WANG_TUMOR_INVASIVENESS_DN	744	28	IGFBP5,ID2,ACTR2,WDR1,NRAS,TCP1,ECI1,SMG7,IQGAP1,TMED5,VAPA,PTGES3,YWHAZ,IVNS1ABP,PRKCD,PTX3,CD9,TCEA1,RNF11,ESD,CD44,DLG1,CELF2,ATP1B1,ATF4,CNBP,BTG1,NUFIP2
Cortex	24hrs	ASC	1.34428e-09	2.58936	4.58267e-06	ChemicalGeneticPerturbations	MATSUDA_NATURAL_KILLER_DIFFERENTIATION	744	46	JUN,FKBP1A,FOS,HNRNPAB,PPARGC1A,NCL,PDLIM4,SGK1,ST13,UBXN2A,PHF21A,TMEM30A,TLE1,DST,HSP90AA1,PTPRD,NISCH,ACTB,EIF5A,BHLHE40,ITGB1,SOX6,SOCS3,TKT,ENDOD1,SAT1,KLF6,HEY1,TJP1,SYNCRIP,CCT7,RANBP1,LDHB,OAF,FMN2,PMEPA1,STXBP4,TUBB2B,CD44,VCP,GEM,TWF1,WWTR1,LGI1,TSC22D3,MAGI1
Cortex	24hrs	ASC	1.54443e-09	4.45633	5.26495e-06	ChemicalGeneticPerturbations	CHIARADONNA_NEOPLASTIC_TRANSFORMATION_KRAS_UP	744	21	SLC12A2,GJA1,TMSB4X,UBE2D2,CTSB,TUBB6,TIPARP,ANP32E,NCAM1,PDPN,TIMP1,SLC6A8,PCNA,IVNS1ABP,NAV2,PCDH7,MRPL18,PHLDA1,NFKBIA,NAP1L1,SET
Cortex	24hrs	ASC	1.76455e-09	8.65052	6.01535e-06	ChemicalGeneticPerturbations	PLASARI_TGFB1_TARGETS_1HR_UP	744	11	ID2,JUNB,ID1,BHLHE40,ZMIZ1,LIF,GADD45B,HBEGF,SLC20A1,GADD45G,HES1
Cortex	24hrs	ASC	9.00476e-09	11.2581	6.06921e-06	Reactome	REACTOME_POST_CHAPERONIN_TUBULIN_FOLDING_PATHWAY	744	8	TUBB6,TUBA4A,TUBB2A,TUBB2B,TUBA1A,TUBB4B,TUBA1B,TUBA1C
Cortex	24hrs	ASC	1.37146e-09	1.73177	6.38141e-06	GObp	GO_POSITIVE_REGULATION_OF_MOLECULAR_FUNCTION	744	116	JUN,CAV2,CAP2,FKBP1A,CDC42,DMD,GRIN2C,MAGI2,HSP90AB1,MAPK8IP3,ADCY2,ANXA2,FAM20A,AKAP6,GADD45A,PLCB1,MT3,TBC1D9,APOE,GNA13,PRKAR1A,PPP1R9A,PPARGC1A,SDC4,CEBPG,ANK2,TCP1,MMD2,CCNL2,IQGAP1,SGK1,DDRGK1,SPRY2,RGS17,PSMD12,UBB,TRAPPC4,PSME4,ARHGEF40,RGS6,MAPRE1,DAB1,APP,LMO4,ERC1,PREX2,CCT2,NCAM1,CCND2,PSD2,FGF14,FARP1,FGFR1,PTK2,ITGB1,TXN,FZD2,PCNA,AKAP13,GNAO1,ADRA1A,CDKN1A,CCNL1,MTPN,HSPA5,POR,GADD…
Cortex	24hrs	ASC	1.37612e-09	1.96814	6.40308e-06	GObp	GO_LOCOMOTION	744	82	CAV2,NRXN1,CDC42,RHBDF1,ID2,BDNF,GRIN2C,GJA1,SEMA4B,CTTN,MAPK8IP3,SBDS,CCDC141,NEDD4,MSN,NRAS,USP24,SIRPG,SIRPA,NEO1,PDE4B,SDC4,LAMA2,SLC7A10,GPC6,ARPC5,ID1,CTNNA2,CTSB,RFX3,DAB1,APP,EZR,DST,DNAJA1,HSP90AA1,SDCBP,RTN4,SLC16A1,LDLR,NCAM1,PDPN,FGFR1,PTK2,ITGB1,SLC3A2,PHACTR1,NRXN3,YWHAE,PDE4D,ITGAV,TNFRSF12A,ATP1B3,KIRREL3,AMOTL1,DOCK4,HBEGF,PRKCD,ERBB4,GPM6A,DDR1,KIF5B,MIF,TUBB2B,CD44,EPS15,ASTN1,…
Cortex	24hrs	ASC	1.99526e-09	2.31069	6.80185e-06	ChemicalGeneticPerturbations	SMID_BREAST_CANCER_BASAL_UP	744	56	PYGB,RND3,AMD1,MFGE8,CDH19,ADCY2,GPM6B,MSN,NDRG2,NES,NCAN,TTYH1,GSTP1,CLDN10,FNDC4,PXDN,LMO4,ANP32E,YWHAZ,TRIM2,SLC16A1,SOX9,TOX,NCAM1,IFRD1,PDPN,PFKP,PTPRZ1,HAPLN1,SOCS3,YWHAE,TMEM100,FAM107A,ENO1,RBP1,RBMS1,KLF6,HBEGF,SYNCRIP,LDHB,GLDC,ITM2C,PTX3,STIP1,TUBB2B,CD44,PHLDA1,SLC7A5,MRAS,TRA2B,S100A6,TM4SF1,WWTR1,S100A10,CNN3,EPRS
Cortex	24hrs	ASC	1.49087e-09	1.95529	6.937e-06	GObp	GO_POSITIVE_REGULATION_OF_PROTEIN_MODIFICATION_PROCESS	744	83	JUN,CAV2,FKBP1A,CDC42,NDFIP1,CLIP3,MAGI2,HSP90AB1,MAPK8IP3,ADCY2,ANXA2,FAM20A,AKAP6,GADD45A,PLCB1,MT3,PRKAR1A,PPP1R9A,PPARGC1A,SDC4,MMD2,CCNL2,IQGAP1,DDRGK1,SPRY2,HES5,PSMD12,UBB,NUPR1,PSME4,DAB1,AUTS2,ROCK2,SQSTM1,SDCBP,BMP1,SOX9,IL18,CCND2,FGFR1,PTK2,ITGB1,TXN,PTPRZ1,SOCS3,UBQLN1,ADRA1A,LIF,CDKN1A,CNTN1,CCNL1,HSPA5,GADD45B,PSMD11,STAT3,HSPH1,PRKCD,ERBB4,GHR,GNL3,CALM2,ARL2BP,TNFRSF1A,MIF,ATP6AP…
Cortex	24hrs	ASC	2.03811e-09	3.49843	6.94793e-06	ChemicalGeneticPerturbations	TIEN_INTESTINE_PROBIOTICS_24HR_DN	744	28	EIF1,ACTG1,EEF1A1,EEF2,THOC2,SLC1A4,UBXN4,CEBPG,TMED5,SEC63,SQSTM1,EIF5A,IFRD1,SLC3A2,SLC6A8,HSPA9,HSPA5,EEF1G,SAT1,HSPH1,FTL,TCEA1,PPP1R15A,PHLDA1,TXNRD1,UBC,BTG1,TFG
Cortex	24hrs	ASC	3.63723e-08	11.6979	7.89279e-06	Biocarta	BIOCARTA_EIF_PATHWAY	744	7	EIF1,EEF2,EIF4A1,EIF2S2,EIF4G2,EIF5,EIF3A
Cortex	24hrs	ASC	2.4946e-09	6.95187	8.50409e-06	ChemicalGeneticPerturbations	CHIBA_RESPONSE_TO_TSA	744	13	H3F3B,ID2,SDC4,CYP4F2,RHOB,LYPLA2,TPP1,SQSTM1,CDKN1A,SRXN1,JMJD1C,CDK11A,TXNRD1
Cortex	24hrs	ASC	2.53513e-09	12.5826	8.64224e-06	ChemicalGeneticPerturbations	NGO_MALIGNANT_GLIOMA_1P_LOH	744	8	HSP90AB1,ANXA2,PGK1,HNRNPK,HSPA5,ENO1,GAPDH,VIM
Cortex	24hrs	ASC	3.09771e-09	3.27404	1.05601e-05	ChemicalGeneticPerturbations	BLUM_RESPONSE_TO_SALIRASIB_UP	744	30	EIF1,EEF2,GADD45A,CEBPG,ANK2,NAPG,NUPR1,SEC63,SQSTM1,RIOK3,IFRD1,TIMP1,CDKN1A,HSPA9,EIF2S2,PTX3,TCEA1,EGR1,PPP1R15A,SSR3,NFKBIA,OGT,SGPL1,EIF5,EIF1B,ATF4,VIM,BTG1,NARS,EPRS
Cortex	24hrs	ASC	2.3879e-09	1.99498	1.11109e-05	GObp	GO_BIOLOGICAL_ADHESION	744	77	NEGR1,NRXN1,CDH20,FKBP1A,CDC42,RND3,ACTG1,FAT3,CTTN,PTPRT,MFGE8,HSP90AB1,CDH19,NEDD4,MSN,SIRPG,SIRPA,HSPB1,CTNND2,BCAN,CDH10,NCAN,NEO1,LAMA2,TTYH1,CLDN10,PCDH9,ZFP36L2,ID1,CTNNA2,RHOB,RORA,HES5,HEPACAM,ADAM23,DAB1,APP,EZR,DST,PTPRD,ACTB,CADM2,SOX9,NCAM1,PDPN,ITGB1,HAPLN1,NRXN3,CNTN1,ZFP36L1,ITGAV,TNFRSF12A,KIRREL3,PCDH1,PCDH7,WNT7B,NTM,DDR1,CD9,OMG,PTPN2,MYL12A,EGR1,CD44,ASTN1,DLG1,FERMT2,IL1RAPL…
Cortex	24hrs	ASC	3.53364e-09	2.57433	1.20462e-05	ChemicalGeneticPerturbations	MILI_PSEUDOPODIA_CHEMOTAXIS_DN	744	44	PLA2G7,FOS,USP14,H3F3B,MAPK8IP3,KDM6B,SLC39A14,SLC1A4,PER3,CTSB,SLC2A1,APP,HMGCS1,NISCH,RTN4,SLC16A1,LDLR,BMP1,CKAP4,MAP4K4,SLC4A7,FGFR1,ITGB1,ZMIZ1,FZD2,SOCS3,HSPA5,POR,PCDH1,KLF6,SLC20A1,F3,DDR1,CD9,ESD,GSPT1,PLAT,OGT,SGPL1,HMGCR,SLC38A2,S100A10,TRA2A,BTG1
Cortex	24hrs	ASC	3.60851e-09	3.50449	1.23014e-05	ChemicalGeneticPerturbations	GOTZMANN_EPITHELIAL_TO_MESENCHYMAL_TRANSITION_DN	744	27	FOS,AMD1,VDAC1,ID2,GJA1,CYP2J2,CAPZA2,SDC4,GSTP1,S100A13,TLE1,YWHAZ,SLC3A2,CCT3,CDKN1A,ZFP36L1,TKT,CALM2,TCEA1,STIP1,EGR1,PA2G4,SCP2,EPS15,NFKBIA,TM4SF1,PAM
Cortex	24hrs	ASC	3.82098e-09	4.25377	1.30257e-05	ChemicalGeneticPerturbations	ZHONG_SECRETOME_OF_LUNG_CANCER_AND_FIBROBLAST	744	21	HSP90AB1,EEF2,MSN,WDR1,SDC4,GSTP1,CTSB,PGK1,APP,YWHAZ,ACTB,YWHAE,ENO1,CST3,LDHA,CD9,UBA52,VCP,PRDX6,PSMB5,SET
Cortex	24hrs	ASC	4.12601e-09	2.00264	1.40656e-05	ChemicalGeneticPerturbations	BENPORATH_NANOG_TARGETS	744	74	JUN,IGFBP2,HSPA4,ID2,GJA1,HMG20A,EEF2,DDX18,CAPZA2,CFL1,GNA13,DHCR7,SDC4,GPC6,NKTR,PRPF39,ID1,SGK1,EHBP1,TLCD1,SPRED1,ZNF281,CEBPZ,SNRNP70,PDPN,FGFR1,ITGB1,NUCKS1,FZD2,PCNA,TSC22D1,ZFP36L1,TIMP4,HSPA5,TNFRSF12A,ACAT2,NOLC1,ANP32B,RBP1,AMOTL1,DTNA,STAT3,SKIL,EIF4G2,KCNN2,CCT7,MORF4L1,INF2,CALM2,PTPN2,IL1RAPL1,KAT6A,ALCAM,PICALM,SLC7A5,RRS1,CELF2,TXNRD1,IGDCC4,SF3B1,UBC,RSRC2,MYO3A,ATF4,CNBP,PSMB5,…
Cortex	24hrs	ASC	4.12655e-09	2.98063	1.40674e-05	ChemicalGeneticPerturbations	BORCZUK_MALIGNANT_MESOTHELIOMA_UP	744	34	FKBP1A,HSPA4,OSMR,VDAC1,HSP90AB1,ANXA2,SERBP1,DDX18,CCT5,UBE2D2,PGK1,MAPRE1,PTGES3,DNAJA1,YWHAZ,CCT2,SRSF10,PCNA,CCT3,ITGAV,AZIN1,STAT3,NME1,MED21,KIF5B,STIP1,SEC61G,PSMD2,NAP1L1,TUBA1A,ACAP2,EPRS,TSC22D2,LAMP2
Cortex	24hrs	ASC	4.20156e-09	5.10725	1.43231e-05	ChemicalGeneticPerturbations	LEE_AGING_NEOCORTEX_UP	744	17	GFAP,FOS,SEMA4B,JUNB,EEF2,GADD45A,ID1,TUBB,SAT1,ATP1B3,CD9,DLG1,CKB,UBC,S100A10,VIM,SET
[truncated: 6,586 more rows]
