# Supplementary material for: Systems spatiotemporal dynamics of traumatic brain injury at single-cell resolution reveals humanin as a therapeutic target
Source: Cell Mol Life Sci. 2022 Aug 11;79(9):480. doi: 10.1007/s00018-022-04495-9 (PMC9372016; doi:10.1007/s00018-022-04495-9)
Supplement: Supplementary file 9 — (XLSX 11 KB) [file 18_2022_4495_MOESM9_ESM.xlsx]

## Sheet: Sheet1
Supplementary Table 8. Number of DEGs reversed by humanin treatment post-TBI for individual cell clusters.
Tissue	Cell Type	# DEGs Padj < 0.05	# DEGs Pval < 0.01
Frontal Cortex	Activated Microglia	24	75
Frontal Cortex	Astrocytes	130	219
Frontal Cortex	Calb2+ Interneurons	0	2
Frontal Cortex	Dlk1+ Interneurons	0	59
Frontal Cortex	Endothelial	113	211
Frontal Cortex	Foxp1+ Interneurons	0	21
Frontal Cortex	Foxp2+ Interneurons	0	1
Frontal Cortex	Layer 2/3 Neurons	7	103
Frontal Cortex	Layer 6 Neurons	0	5
Frontal Cortex	Macrophages	1	26
Frontal Cortex	Microglia	2	31
Frontal Cortex	Neurogenesis1	4	51
Frontal Cortex	Neurogenesis2	0	34
Frontal Cortex	Newly Formed Oligodendrocytes	0	22
Frontal Cortex	Nrip+ Interneurons	1	35
Frontal Cortex	Oligodendrocyte Precursor Cells	11	101
Frontal Cortex	Oligodendrocytes	83	149
Frontal Cortex	Pericytes	4	81
Frontal Cortex	Piriform Cortex	0	16
Frontal Cortex	Smooth Muscle Cells	0	15
Frontal Cortex	Sst+ Interneurons	0	2
Frontal Cortex	Tac1+ Interneurons	0	4
Frontal Cortex	Trh+ Interneurons	0	5
Frontal Cortex	Vip+ Interneurons	0	6
Frontal Cortex	Zscan20+ Neurons	0	1
Hippocampus	Activated Microglia	20	60
Hippocampus	Astrocytes	166	214
Hippocampus	CA 2/3 Pyramidal Neurons	0	4
Hippocampus	CA1 Pyramidal Neurons Dorsal	1	81
Hippocampus	CA1 Pyramidal Neurons Ventral	0	42
Hippocampus	Cajal Retzius	0	22
Hippocampus	Choroid Plexus Epithelial Cells	5	32
Hippocampus	Dentate Gyrus	1	60
Hippocampus	Endothelial	96	208
Hippocampus	Entorhinal Cortex	3	132
Hippocampus	Ependymal Cells	1	22
Hippocampus	Fibroblasts	0	17
Hippocampus	Interneurons	0	69
Hippocampus	Macrophages	1	33
Hippocampus	Microglia	4	43
Hippocampus	Neurogenesis1	0	37
Hippocampus	Neurogenesis2	1	58
Hippocampus	Newly Formed Oligodendrocytes	1	110
Hippocampus	Oligodendrocyte Precursor Cells	46	194
Hippocampus	Oligodendrocytes	135	189
Hippocampus	Pericytes	1	18
Hippocampus	Smooth Muscle Cells	4	62
Hippocampus	Subiculum	1	78
