# Supplementary material for: Systems spatiotemporal dynamics of traumatic brain injury at single-cell resolution reveals humanin as a therapeutic target
Source: Cell Mol Life Sci. 2022 Aug 11;79(9):480. doi: 10.1007/s00018-022-04495-9 (PMC9372016; doi:10.1007/s00018-022-04495-9)
Supplement: Supplementary file 10 — (XLSX 65 KB) [file 18_2022_4495_MOESM10_ESM.xlsx]

## Sheet: Sheet1
Supplementary Table 9. Over-represented biological pathways among DEGs reversed by humanin treatment post-TBI for individual cell clusters.
CellType	Pval	Enrichment	FDR	PathwaySource	Pathway	nGenes	nOverlap	Overlap	Timepoint	Tissue
aMG	2.43739e-06	3.21626	0.0113412	GObp	GO_POSITIVE_REGULATION_OF_GENE_EXPRESSION	61	17	DAB2,JUNB,CPEB1,TCF12,NCL,CHD1,FOSB,LPIN2,KLF2,MED21,JUND,HSPA5,TAF1C,WWOX,ITGA6,HNRNPU,PASK	24hrs	Cortex
aMG	4.34555e-06	3.08796	0.0202198	GObp	GO_POSITIVE_REGULATION_OF_BIOSYNTHETIC_PROCESS	61	17	DAB2,JUNB,PRKCA,CPEB1,TCF12,NCL,CHD1,FOSB,LPIN2,KLF2,MED21,JUND,HSPA5,WWOX,ITGA6,PASK,CCT6A	24hrs	Cortex
ASC	9.53966e-13	8.80829	4.76983e-11	Hallmark	HALLMARK_TNFA_SIGNALING_VIA_NFKB	193	17	JUN,KDM6B,PDE4B,SDC4,SGK1,KLF6,PMEPA1,HBEGF,TIPARP,CCNL1,LIF,SOCS3,LDLR,TRIB1,CD44,PTX3,MCL1	24hrs	Cortex
ASC	5.8242e-07	5.69948	2.9121e-05	Hallmark	HALLMARK_ESTROGEN_RESPONSE_EARLY	193	11	GJA1,SLC1A4,SLC2A1,NAV2,TIPARP,TUBB2B,ENDOD1,CD44,MED13L,AFF1,SLC7A5	24hrs	Cortex
ASC	5.8242e-07	5.69948	2.9121e-05	Hallmark	HALLMARK_EPITHELIAL_MESENCHYMAL_TRANSITION	193	11	JUN,BDNF,GJA1,SDC4,PMEPA1,SLC6A8,TIMP1,ITGAV,CD44,DST,PTX3	24hrs	Cortex
ASC	5.8532e-07	8.20807	2.9266e-05	Hallmark	HALLMARK_ANDROGEN_RESPONSE	193	8	ADAMTS1,SGK1,ZMIZ1,PMEPA1,HMGCS1,ITGAV,INSIG1,HMGCR	24hrs	Cortex
ASC	1.34914e-08	2.64427	6.27756e-05	GObp	GO_RESPONSE_TO_ENDOGENOUS_STIMULUS	193	37	JUN,CPEB4,GSTM3,GJA1,YWHAG,MSN,NEDD4,MT3,MAGI2,PDE4B,ROCK2,ADAMTS1,SPRED1,RGMA,SGK1,IQGAP1,SKIL,PDE4D,RRM2B,KLF6,FGFR1,PMEPA1,HMGCS1,TIMP1,PHIP,PTK2,CDO1,SOCS3,TIMP4,CD44,RHOQ,ADRA1A,PRKCD,FGFR2,NASP,PAM,AGT	24hrs	Cortex
ASC	1.3897e-06	6.47668	6.94851e-05	Hallmark	HALLMARK_UV_RESPONSE_DN	193	9	BDNF,GJA1,PHF3,MAGI2,TJP1,ZMIZ1,LDLR,DLG1,INSIG1	24hrs	Cortex
ASC	2.01674e-08	2.60475	9.38391e-05	GObp	GO_REGULATION_OF_CELL_DEATH	193	37	JUN,CPEB4,BDNF,NES,YWHAG,HSPB1,MT3,APOE,TCP1,TLE1,DDB1,SGK1,SKIL,OXR1,RRM2B,HSPH1,FGFR1,DDX3X,RBM25,MAP4K4,TIMP1,PHIP,PTK2,ITGAV,RTN4,SOCS3,ARHGEF12,AKAP13,CD44,PRKCD,FGFR2,TMF1,KCNK2,MCL1,GADD45G,AGT,HMGCR	24hrs	Cortex
ASC	4.04321e-06	5.18135	0.00020216	Hallmark	HALLMARK_MTORC1_SIGNALING	193	10	SLC1A4,SLC2A1,CYP51A1,IFRD1,HMGCS1,LDLR,CCT6A,SLC7A5,INSIG1,HMGCR	24hrs	Cortex
ASC	4.93305e-08	2.44049	0.000229535	GObp	GO_REGULATION_OF_INTRACELLULAR_SIGNAL_TRANSDUCTION	193	39	JUN,GJA1,NEDD4,HSPB1,MT3,OTUD7A,MAGI2,APOE,MAPK8IP3,ARHGEF40,SPRED1,MMD2,TLE1,HES5,SKIL,PDE4D,RRM2B,HSPH1,FGFR1,DDX3X,HBEGF,MAP4K4,LIF,PTK2,SOCS3,ARHGEF12,AKAP13,TRIB1,CD44,RHOQ,ADRA1A,SLC20A1,PRKCD,FGFR2,DLG1,MCL1,GADD45G,AGT,HMGCR	24hrs	Cortex
ASC	8.768e-08	3.08979	0.000407975	GObp	GO_NEGATIVE_REGULATION_OF_CELL_DEATH	193	26	JUN,CPEB4,BDNF,NES,HSPB1,MT3,APOE,TLE1,DDB1,SGK1,OXR1,RRM2B,HSPH1,DDX3X,MAP4K4,TIMP1,PHIP,PTK2,ITGAV,SOCS3,CD44,PRKCD,FGFR2,TMF1,MCL1,HMGCR	24hrs	Cortex
ASC	8.99468e-08	2.50038	0.000418522	GObp	GO_REGULATION_OF_CELL_DIFFERENTIATION	193	36	JUN,GFAP,BDNF,GJA1,YWHAG,NEDD4,MT3,SUPT6H,MAGI2,APOE,PDLIM7,ROCK2,ADAMTS1,MMD2,HES5,SGK1,SKIL,IFRD1,FGFR1,S1PR3,LIF,PTK2,ITGAV,RTN4,SOCS3,AKAP13,TRIB1,WNT7B,PURB,PTPRD,FGFR2,HOOK3,WWTR1,INSIG1,AGT,NRG3	24hrs	Cortex
ASC	8.99468e-08	2.50038	0.000418522	GObp	GO_POSITIVE_REGULATION_OF_PROTEIN_METABOLIC_PROCESS	193	36	JUN,RNF144A,GJA1,MSN,NEDD4,HSPB1,MT3,MAGI2,APOE,MAPK8IP3,ROCK2,CEBPG,MMD2,HES5,SDC4,IQGAP1,HSPH1,FGFR1,DDX3X,TIPARP,CAB39,CCNL1,LIF,PTK2,SOCS3,TRIB1,CD44,ADRA1A,PRKCD,FGFR2,DLG1,GADD45G,AGT,HMGCR,NRG3,PASK	24hrs	Cortex
ASC	1.12551e-07	2.43906	0.000523702	GObp	GO_INTRACELLULAR_SIGNAL_TRANSDUCTION	193	37	JUN,HSPB1,MT3,APOE,MAPK8IP3,ROCK2,SPRED1,SGK1,IQGAP1,TJP1,PDE4D,NISCH,FGFR1,DDX3X,HBEGF,MAP4K4,ERC1,CAB39,AMOTL1,LIF,PTK2,ITGAV,TEAD1,SOCS3,ARHGEF12,AKAP13,NCAM1,TRIB1,RHOQ,ADRA1A,PRKCD,FGFR2,DCLK1,MCL1,WWTR1,AGT,NRG3	24hrs	Cortex
ASC	1.31167e-07	3.20496	0.000610321	GObp	GO_REGULATION_OF_KINASE_ACTIVITY	193	24	YWHAG,HSPB1,MT3,APOE,MAPK8IP3,SPRED1,MMD2,SDC4,IQGAP1,HSPH1,FGFR1,CAB39,CCNL1,PTK2,SOCS3,AKAP13,TRIB1,PRKCD,DLG1,GADD45G,WWTR1,AGT,HMGCR,NRG3	24hrs	Cortex
ASC	1.31283e-05	9.59509	0.000656415	Hallmark	HALLMARK_TGF_BETA_SIGNALING	193	5	TJP1,SKIL,PMEPA1,SLC20A1,WWTR1	24hrs	Cortex
ASC	1.43062e-07	3.09889	0.000665667	GObp	GO_REGULATION_OF_CELL_DEVELOPMENT	193	25	GFAP,BDNF,YWHAG,NEDD4,MT3,MAGI2,APOE,ROCK2,ADAMTS1,MMD2,HES5,SGK1,SKIL,IFRD1,FGFR1,S1PR3,LIF,PTK2,RTN4,AKAP13,TRIB1,PTPRD,HOOK3,WWTR1,NRG3	24hrs	Cortex
ASC	1.9244e-07	2.76466	0.000895422	GObp	GO_NEGATIVE_REGULATION_OF_PROTEIN_METABOLIC_PROCESS	193	29	JUN,CPEB4,YWHAG,HSPB1,MT3,SUPT6H,APOE,ROCK2,SPRED1,PDE4D,HSPH1,PMEPA1,DDX3X,HBEGF,CST3,TIMP1,LIF,ITGAV,SOCS3,TIMP4,TRIB1,AZIN1,CD44,PRKCD,PTX3,DLG1,WWTR1,AGT,HMGCR	24hrs	Cortex
ASC	2.26742e-07	4.8521	0.00105503	GObp	GO_UROGENITAL_SYSTEM_DEVELOPMENT	193	14	MAGI2,ADAMTS1,HES5,SDC4,IQGAP1,RRM2B,FGFR1,TIPARP,WNT7B,FGFR2,SGPL1,DLG1,WWTR1,AGT	24hrs	Cortex
ASC	2.33764e-07	3.30884	0.0010877	GObp	GO_ENZYME_LINKED_RECEPTOR_PROTEIN_SIGNALING_PATHWAY	193	22	JUN,BDNF,HSPB1,MAGI2,ROCK2,SPRED1,RGMA,IQGAP1,SKIL,DDR1,FGFR1,HBEGF,TIPARP,PHIP,LIF,PTK2,ITGAV,RHOQ,PTPRD,FGFR2,SGPL1,NRG3	24hrs	Cortex
ASC	2.34869e-07	2.36971	0.00109285	GObp	GO_REGULATION_OF_PHOSPHORUS_METABOLIC_PROCESS	193	37	JUN,YWHAG,HSPB1,MT3,MAGI2,APOE,MAPK8IP3,ROCK2,SPRED1,MMD2,HES5,SDC4,IQGAP1,PDE4D,HSPH1,FGFR1,PMEPA1,MAP4K4,CAB39,CCNL1,PHIP,LIF,PTK2,SOCS3,LDLR,AKAP13,TRIB1,CD44,ADRA1A,PRKCD,FGFR2,DLG1,GADD45G,WWTR1,AGT,HMGCR,NRG3	24hrs	Cortex
ASC	2.3491e-05	11.5141	0.00117455	Hallmark	HALLMARK_ANGIOGENESIS	193	4	FGFR1,TIMP1,PTK2,ITGAV	24hrs	Cortex
ASC	2.60022e-07	4.03125	0.00120988	GObp	GO_NEGATIVE_REGULATION_OF_INTRACELLULAR_SIGNAL_TRANSDUCTION	193	17	HSPB1,OTUD7A,MAGI2,APOE,SPRED1,TLE1,RRM2B,HSPH1,DDX3X,LIF,SOCS3,CD44,ADRA1A,PRKCD,DLG1,MCL1,HMGCR	24hrs	Cortex
ASC	2.55224e-05	4.66321	0.00127612	Hallmark	HALLMARK_HYPOXIA	193	9	JUN,NCAN,SLC2A1,SDC4,KLF6,TIPARP,PAM,PPP1R3C,PHKG1	24hrs	Cortex
ASC	2.72201e-05	5.14916	0.001361	Hallmark	HALLMARK_APOPTOSIS	193	8	JUN,HSPB1,EMP1,TIMP1,PTK2,CD44,SLC20A1,MCL1	24hrs	Cortex
ASC	4.55211e-07	2.77572	0.00211809	GObp	GO_CELLULAR_RESPONSE_TO_ENDOGENOUS_STIMULUS	193	27	JUN,CPEB4,YWHAG,MSN,NEDD4,MT3,MAGI2,PDE4B,ROCK2,ADAMTS1,SPRED1,RGMA,SGK1,IQGAP1,SKIL,PDE4D,KLF6,FGFR1,PMEPA1,HMGCS1,PHIP,PTK2,CD44,RHOQ,PRKCD,FGFR2,AGT	24hrs	Cortex
ASC	5.17964e-07	4.04398	0.00241009	GObp	GO_GROWTH	193	16	BDNF,GJA1,MAGI2,EMP1,IQGAP1,ZMIZ1,IFRD1,PDE4D,ZFP36L1,ITGAV,WNT7B,ADRA1A,FGFR2,DCLK1,WWTR1,AGT	24hrs	Cortex
ASC	5.87903e-07	2.95725	0.00273551	GObp	GO_ORGAN_MORPHOGENESIS	193	24	JUN,GJA1,MSN,NEDD4,MAPK8IP3,ADAMTS1,TLE1,HES5,ZMIZ1,DDR1,FGFR1,TIPARP,LIF,PTK2,RTN4,WNT7B,FGFR2,SGPL1,GJB6,DLG1,PAM,WWTR1,INSIG1,NRG3	24hrs	Cortex
ASC	6.56627e-07	3.02464	0.00305528	GObp	GO_CARDIOVASCULAR_SYSTEM_DEVELOPMENT	193	23	JUN,GJA1,NEDD4,APOE,KDM6B,ADAMTS1,ZMIZ1,FGFR1,TIPARP,ZFP36L1,LIF,PTK2,ITGAV,RTN4,SOCS3,AKAP13,WNT7B,ADRA1A,FGFR2,SGPL1,PAM,KCNK2,AGT	24hrs	Cortex
ASC	6.56627e-07	3.02464	0.00305528	GObp	GO_CIRCULATORY_SYSTEM_DEVELOPMENT	193	23	JUN,GJA1,NEDD4,APOE,KDM6B,ADAMTS1,ZMIZ1,FGFR1,TIPARP,ZFP36L1,LIF,PTK2,ITGAV,RTN4,SOCS3,AKAP13,WNT7B,ADRA1A,FGFR2,SGPL1,PAM,KCNK2,AGT	24hrs	Cortex
ASC	8.02632e-05	7.00182	0.00401316	Hallmark	HALLMARK_CHOLESTEROL_HOMEOSTASIS	193	5	CYP51A1,ACAT2,HMGCS1,LDLR,HMGCR	24hrs	Cortex
ASC	8.77487e-07	2.97556	0.00408295	GObp	GO_NEGATIVE_REGULATION_OF_DEVELOPMENTAL_PROCESS	193	23	GFAP,GJA1,MT3,APOE,ROCK2,HES5,SKIL,IFRD1,FGFR1,CST3,TIMP1,S1PR3,LIF,PTK2,ITGAV,RTN4,TRIB1,HOOK3,KCNK2,WWTR1,INSIG1,AGT,NRG3	24hrs	Cortex
ASC	8.89348e-07	4.35669	0.00413814	GObp	GO_DEVELOPMENTAL_GROWTH	193	14	BDNF,GJA1,MAGI2,IQGAP1,ZMIZ1,IFRD1,PDE4D,ZFP36L1,WNT7B,ADRA1A,FGFR2,DCLK1,WWTR1,AGT	24hrs	Cortex
ASC	6.21787e-06	4.54142	0.00419085	Reactome	REACTOME_AXON_GUIDANCE	193	11	PITPNA,MSN,NCAN,ROCK2,RGMA,FGFR1,PTK2,ITGAV,ARHGEF12,NCAM1,DLG1	24hrs	Cortex
ASC	9.30412e-07	2.24222	0.00432921	GObp	GO_REGULATION_OF_PROTEIN_MODIFICATION_PROCESS	193	37	JUN,YWHAG,HSPB1,MT3,SUPT6H,MAGI2,APOE,MAPK8IP3,ROCK2,SPRED1,MMD2,HES5,SDC4,IQGAP1,PDE4D,HSPH1,FGFR1,PMEPA1,MAP4K4,CAB39,CCNL1,PHIP,LIF,PTK2,SOCS3,AKAP13,TRIB1,CD44,ADRA1A,PRKCD,FGFR2,DLG1,GADD45G,WWTR1,AGT,HMGCR,NRG3	24hrs	Cortex
ASC	1.18014e-06	2.32103	0.0054912	GObp	GO_TISSUE_DEVELOPMENT	193	34	JUN,GSTM3,GJA1,MSN,NEDD4,HNRNPAB,MAGI2,KDM6B,HES5,SDC4,EMP1,IQGAP1,TJP1,SKIL,DDR1,IFRD1,PDE4D,FGFR1,HBEGF,TIPARP,ZFP36L1,TIMP1,SLC4A7,LIF,ITGAV,RTN4,SOCS3,AKAP13,WNT7B,CD44,FGFR2,DLG1,WWTR1,AGT	24hrs	Cortex
ASC	1.43493e-06	2.74436	0.00667674	GObp	GO_PROTEIN_PHOSPHORYLATION	193	25	MT3,MAPK8IP3,ROCK2,SPRED1,MMD2,SGK1,DDR1,FGFR1,HBEGF,MAP4K4,ERC1,CAB39,LIF,PTK2,ITGAV,AKAP13,NCAM1,TRIB1,PRKCD,FGFR2,DCLK1,MYO3A,AGT,PASK,PHKG1	24hrs	Cortex
ASC	1.49215e-06	2.73856	0.00694297	GObp	GO_REGULATION_OF_TRANSFERASE_ACTIVITY	193	25	YWHAG,HSPB1,MT3,APOE,MAPK8IP3,TCP1,SPRED1,MMD2,SDC4,IQGAP1,HSPH1,FGFR1,CAB39,CCNL1,PTK2,SOCS3,AKAP13,TRIB1,PRKCD,DLG1,GADD45G,WWTR1,AGT,HMGCR,NRG3	24hrs	Cortex
ASC	1.56003e-06	10.5383	0.0072588	GObp	GO_VASCULOGENESIS	193	6	ZMIZ1,TIPARP,ZFP36L1,PTK2,WNT7B,SGPL1	24hrs	Cortex
ASC	0.000145417	4.14508	0.00727084	Hallmark	HALLMARK_MYOGENESIS	193	8	PDLIM7,IFRD1,NAV2,HBEGF,SLC6A8,NCAM1,WWTR1,PPP1R3C	24hrs	Cortex
ASC	1.6056e-06	2.36524	0.00747085	GObp	GO_NEUROGENESIS	193	32	JUN,GFAP,BDNF,GJA1,YWHAG,NEDD4,MT3,MAGI2,APOE,MAPK8IP3,THOC2,ADAMTS1,MMD2,HES5,SDC4,SGK1,IQGAP1,SKIL,IFRD1,FGFR1,TUBB2B,SLC4A7,LIF,PTK2,RTN4,NCAM1,WNT7B,PTPRD,FGFR2,DCLK1,HOOK3,NRG3	24hrs	Cortex
ASC	1.74379e-06	2.78505	0.00811388	GObp	GO_RESPONSE_TO_HORMONE	193	24	JUN,GSTM3,GJA1,YWHAG,MSN,NEDD4,MT3,ROCK2,ADAMTS1,SGK1,PMEPA1,HMGCS1,TIMP1,PHIP,PTK2,CDO1,SOCS3,TIMP4,RHOQ,ADRA1A,PRKCD,NASP,PAM,AGT	24hrs	Cortex
ASC	1.83106e-06	18.8413	0.00851991	GObp	GO_EMBRYONIC_PLACENTA_MORPHOGENESIS	193	4	ZFP36L1,SOCS3,WNT7B,FGFR2	24hrs	Cortex
ASC	1.88737e-06	3.36694	0.00878195	GObp	GO_REGULATION_OF_NEURON_DIFFERENTIATION	193	18	GFAP,BDNF,YWHAG,NEDD4,MT3,MAGI2,APOE,ADAMTS1,MMD2,HES5,SGK1,SKIL,IFRD1,FGFR1,LIF,PTK2,RTN4,PTPRD	24hrs	Cortex
ASC	2.00207e-06	5.57134	0.00931565	GObp	GO_EPITHELIAL_CELL_DEVELOPMENT	193	10	GSTM3,GJA1,MSN,MAGI2,IQGAP1,TJP1,PDE4D,FGFR1,SLC4A7,WNT7B	24hrs	Cortex
ASC	2.09605e-06	4.33167	0.0097529	GObp	GO_IN_UTERO_EMBRYONIC_DEVELOPMENT	193	13	GJA1,TANC2,MAPK8IP3,TJP1,SKIL,ZMIZ1,FGFR1,ZFP36L1,LIF,SOCS3,WNT7B,FGFR2,NASP	24hrs	Cortex
ASC	2.33909e-06	3.80981	0.0108838	GObp	GO_REGULATION_OF_NEURON_PROJECTION_DEVELOPMENT	193	15	GFAP,BDNF,NEDD4,MT3,MAGI2,APOE,ADAMTS1,SGK1,SKIL,IFRD1,FGFR1,LIF,PTK2,RTN4,PTPRD	24hrs	Cortex
ASC	2.51241e-06	2.60068	0.0116903	GObp	GO_POSITIVE_REGULATION_OF_PHOSPHATE_METABOLIC_PROCESS	193	26	JUN,MT3,MAGI2,APOE,MAPK8IP3,ROCK2,MMD2,HES5,SDC4,IQGAP1,HSPH1,FGFR1,CAB39,CCNL1,LIF,PTK2,SOCS3,CD44,ADRA1A,PRKCD,FGFR2,DLG1,GADD45G,AGT,HMGCR,NRG3	24hrs	Cortex
ASC	2.51241e-06	2.60068	0.0116903	GObp	GO_POSITIVE_REGULATION_OF_PHOSPHORUS_METABOLIC_PROCESS	193	26	JUN,MT3,MAGI2,APOE,MAPK8IP3,ROCK2,MMD2,HES5,SDC4,IQGAP1,HSPH1,FGFR1,CAB39,CCNL1,LIF,PTK2,SOCS3,CD44,ADRA1A,PRKCD,FGFR2,DLG1,GADD45G,AGT,HMGCR,NRG3	24hrs	Cortex
ASC	2.56443e-06	8.05987	0.0119323	GObp	GO_ENDOTHELIUM_DEVELOPMENT	193	7	GSTM3,GJA1,MSN,KDM6B,TJP1,PDE4D,WNT7B	24hrs	Cortex
ASC	1.97314e-05	7.22979	0.013299	Reactome	REACTOME_L1CAM_INTERACTIONS	193	6	MSN,NCAN,FGFR1,ITGAV,NCAM1,DLG1	24hrs	Cortex
ASC	3.21725e-06	2.5116	0.0149699	GObp	GO_LOCOMOTION	193	27	BDNF,GJA1,USP24,MSN,NEDD4,MAPK8IP3,PDE4B,SDC4,DDR1,PDE4D,FGFR1,HBEGF,TUBB2B,AMOTL1,PTK2,ITGAV,RTN4,LDLR,NCAM1,CD44,DST,PRKCD,DCLK1,SGPL1,TMF1,SLC7A5,NRG3	24hrs	Cortex
ASC	3.26952e-06	3.0168	0.0152131	GObp	GO_NEURON_DEVELOPMENT	193	20	JUN,GFAP,BDNF,GJA1,NEDD4,APOE,MAPK8IP3,THOC2,HES5,SDC4,SGK1,IQGAP1,FGFR1,SLC4A7,LIF,PTK2,RTN4,NCAM1,FGFR2,DCLK1	24hrs	Cortex
ASC	3.47175e-06	3.11045	0.016154	GObp	GO_REGULATION_OF_GROWTH	193	19	BDNF,GJA1,MT3,APOE,SGK1,DDR1,IFRD1,FGFR1,DDX3X,HBEGF,PTK2,RTN4,MBD5,SOCS3,FGFR2,SGPL1,KCNK2,AGT,NRG3	24hrs	Cortex
ASC	3.51334e-06	6.63212	0.0163476	GObp	GO_KIDNEY_EPITHELIUM_DEVELOPMENT	193	8	MAGI2,HES5,SDC4,IQGAP1,FGFR1,WNT7B,FGFR2,DLG1	24hrs	Cortex
ASC	3.60331e-06	3.68342	0.0167662	GObp	GO_NEGATIVE_REGULATION_OF_PHOSPHORYLATION	193	15	JUN,YWHAG,HSPB1,APOE,SPRED1,PDE4D,HSPH1,PMEPA1,LIF,SOCS3,TRIB1,PRKCD,DLG1,WWTR1,HMGCR	24hrs	Cortex
ASC	3.65558e-06	2.90155	0.0170094	GObp	GO_REGULATION_OF_NERVOUS_SYSTEM_DEVELOPMENT	193	21	GFAP,BDNF,YWHAG,NEDD4,MT3,MAGI2,APOE,ADAMTS1,MMD2,HES5,SGK1,SKIL,IFRD1,FGFR1,LIF,PTK2,RTN4,PTPRD,DLG1,HOOK3,NRG3	24hrs	Cortex
ASC	3.93151e-06	2.16922	0.0182933	GObp	GO_REGULATION_OF_MULTICELLULAR_ORGANISMAL_DEVELOPMENT	193	35	JUN,GFAP,BDNF,GJA1,YWHAG,NEDD4,HSPB1,MT3,SUPT6H,MAGI2,APOE,ROCK2,ADAMTS1,MMD2,HES5,SGK1,SKIL,IFRD1,FGFR1,TIMP1,S1PR3,LIF,PTK2,RTN4,TRIB1,PURB,PTPRD,FGFR2,DLG1,HOOK3,KCNK2,WWTR1,AGT,HMGCR,NRG3	24hrs	Cortex
ASC	4.13921e-06	2.7208	0.0192597	GObp	GO_POSITIVE_REGULATION_OF_INTRACELLULAR_SIGNAL_TRANSDUCTION	193	23	JUN,GJA1,NEDD4,MT3,MAPK8IP3,SPRED1,MMD2,HES5,SKIL,FGFR1,HBEGF,LIF,PTK2,SOCS3,AKAP13,CD44,ADRA1A,SLC20A1,FGFR2,MCL1,GADD45G,AGT,HMGCR	24hrs	Cortex
ASC	4.44948e-06	11.5141	0.0207034	GObp	GO_ENDOTHELIAL_CELL_DEVELOPMENT	193	5	GSTM3,MSN,TJP1,PDE4D,WNT7B	24hrs	Cortex
ASC	4.44948e-06	11.5141	0.0207034	GObp	GO_SMOOTH_MUSCLE_CONTRACTION	193	5	ROCK2,PDE4D,ADRA1A,DLG1,AGT	24hrs	Cortex
ASC	4.93385e-06	4.30285	0.0229572	GObp	GO_REGULATION_OF_DEVELOPMENTAL_GROWTH	193	12	BDNF,GJA1,MT3,APOE,IFRD1,FGFR1,PTK2,RTN4,MBD5,FGFR2,SGPL1,KCNK2	24hrs	Cortex
ASC	5.0079e-06	5.61833	0.0233017	GObp	GO_REGULATION_OF_EPITHELIAL_CELL_MIGRATION	193	9	JUN,HSPB1,APOE,ROCK2,FGFR1,HBEGF,AMOTL1,PTK2,AGT	24hrs	Cortex
ASC	5.39758e-06	15.3521	0.025115	GObp	GO_HIPPO_SIGNALING	193	4	TJP1,AMOTL1,TEAD1,WWTR1	24hrs	Cortex
ASC	5.42316e-06	3.2563	0.0252339	GObp	GO_NEGATIVE_REGULATION_OF_PHOSPHORUS_METABOLIC_PROCESS	193	17	JUN,YWHAG,HSPB1,APOE,ROCK2,SPRED1,IQGAP1,PDE4D,HSPH1,PMEPA1,LIF,SOCS3,TRIB1,PRKCD,DLG1,WWTR1,HMGCR	24hrs	Cortex
ASC	5.42316e-06	3.2563	0.0252339	GObp	GO_NEGATIVE_REGULATION_OF_PHOSPHATE_METABOLIC_PROCESS	193	17	JUN,YWHAG,HSPB1,APOE,ROCK2,SPRED1,IQGAP1,PDE4D,HSPH1,PMEPA1,LIF,SOCS3,TRIB1,PRKCD,DLG1,WWTR1,HMGCR	24hrs	Cortex
ASC	5.67591e-06	2.82252	0.02641	GObp	GO_REGULATION_OF_CELLULAR_COMPONENT_MOVEMENT	193	21	JUN,MSN,HSPB1,MAGI2,APOE,PDE4B,ROCK2,SDC4,SGK1,PDE4D,NISCH,FGFR1,HBEGF,TIMP1,AMOTL1,PTK2,ITGAV,RTN4,TRIB1,AGT,NRG3	24hrs	Cortex
ASC	5.83849e-06	2.66602	0.0271665	GObp	GO_EMBRYO_DEVELOPMENT	193	23	GJA1,TANC2,NES,KDM6B,MAPK8IP3,HES5,SDC4,TJP1,SKIL,ZMIZ1,ZNF281,FGFR1,ZFP36L1,LIF,PTK2,ITGAV,SOCS3,WNT7B,FGFR2,GJB6,NASP,DLG1,INSIG1	24hrs	Cortex
ASC	5.95295e-06	2.53739	0.0276991	GObp	GO_REGULATION_OF_ANATOMICAL_STRUCTURE_MORPHOGENESIS	193	25	BDNF,MSN,NEDD4,HSPB1,MT3,MAGI2,APOE,ROCK2,SGK1,SKIL,IFRD1,FGFR1,CST3,INF2,PHIP,LIF,PTK2,RTN4,AKAP13,RHOQ,PTPRD,FGFR2,DLG1,WWTR1,AGT	24hrs	Cortex
ASC	6.0607e-06	8.63558	0.0282004	GObp	GO_ENDOTHELIAL_CELL_DIFFERENTIATION	193	6	GSTM3,MSN,KDM6B,TJP1,PDE4D,WNT7B	24hrs	Cortex
ASC	6.11597e-06	2.73029	0.0284576	GObp	GO_CELL_MOTILITY	193	22	GJA1,USP24,MSN,PDE4B,SDC4,DDR1,PDE4D,FGFR1,HBEGF,TUBB2B,AMOTL1,PTK2,ITGAV,RTN4,CD44,DST,PRKCD,DCLK1,SGPL1,TMF1,SLC7A5,NRG3	24hrs	Cortex
ASC	6.11597e-06	2.73029	0.0284576	GObp	GO_LOCALIZATION_OF_CELL	193	22	GJA1,USP24,MSN,PDE4B,SDC4,DDR1,PDE4D,FGFR1,HBEGF,TUBB2B,AMOTL1,PTK2,ITGAV,RTN4,CD44,DST,PRKCD,DCLK1,SGPL1,TMF1,SLC7A5,NRG3	24hrs	Cortex
ASC	6.26832e-06	3.36315	0.0291665	GObp	GO_SENSORY_ORGAN_DEVELOPMENT	193	16	JUN,GJA1,NES,HES5,SDC4,SKIL,DDR1,FGFR1,SLC4A7,LIF,WNT7B,FGFR2,GJB6,DLG1,KCNK2,INSIG1	24hrs	Cortex
ASC	6.40991e-06	2.25276	0.0298253	GObp	GO_CELL_DEVELOPMENT	193	31	JUN,GFAP,BDNF,GSTM3,GJA1,MSN,NEDD4,MT3,HNRNPAB,MAGI2,APOE,MAPK8IP3,THOC2,HES5,SDC4,SGK1,IQGAP1,TJP1,PDE4D,FGFR1,SLC4A7,LIF,PTK2,ITGAV,RTN4,NCAM1,WNT7B,FGFR2,DCLK1,TMF1,AGT	24hrs	Cortex
ASC	7.06944e-06	7.04261	0.0328941	GObp	GO_POSITIVE_REGULATION_OF_EPITHELIAL_CELL_MIGRATION	193	7	JUN,HSPB1,ROCK2,FGFR1,HBEGF,AMOTL1,AGT	24hrs	Cortex
ASC	7.15515e-06	3.32938	0.0332929	GObp	GO_TRANSMEMBRANE_RECEPTOR_PROTEIN_TYROSINE_KINASE_SIGNALING_PATHWAY	193	16	BDNF,HSPB1,ROCK2,SPRED1,IQGAP1,DDR1,FGFR1,HBEGF,TIPARP,PHIP,PTK2,ITGAV,RHOQ,FGFR2,SGPL1,NRG3	24hrs	Cortex
ASC	7.81651e-06	14.2934	0.0363702	GObp	GO_REGULATION_OF_CARDIAC_MUSCLE_CELL_PROLIFERATION	193	4	GJA1,FGFR1,FGFR2,KCNK2	24hrs	Cortex
ASC	0.000741325	3.62694	0.0370662	Hallmark	HALLMARK_INFLAMMATORY_RESPONSE	193	7	OSMR,PDE4B,KLF6,HBEGF,TIMP1,LIF,LDLR	24hrs	Cortex
ASC	0.000741325	3.62694	0.0370662	Hallmark	HALLMARK_P53_PATHWAY	193	7	JUN,PMM1,LDHB,HBEGF,ZFP36L1,LIF,TM4SF1	24hrs	Cortex
ASC	0.000741325	3.62694	0.0370662	Hallmark	HALLMARK_IL2_STAT5_SIGNALING	193	7	EMP1,KLF6,LIF,ITGAV,CKAP4,SYT11,CD44	24hrs	Cortex
ASC	8.27659e-06	3.15709	0.038511	GObp	GO_REGULATION_OF_CELL_PROJECTION_ORGANIZATION	193	17	GFAP,BDNF,NEDD4,MT3,MAGI2,APOE,ADAMTS1,SGK1,SKIL,IFRD1,FGFR1,LIF,PTK2,RTN4,RHOQ,PTPRD,PRKCD	24hrs	Cortex
ASC	9.08103e-06	2.25113	0.042254	GObp	GO_RESPONSE_TO_OXYGEN_CONTAINING_COMPOUND	193	30	JUN,CPEB4,GJA1,YWHAG,MSN,MT3,APOE,KDM6B,PDE4B,ROCK2,ADAMTS1,OXR1,PDE4D,KLF6,HMGCS1,TIMP1,PHIP,PTK2,CDO1,SOCS3,TIMP4,TRIB1,WNT7B,RHOQ,PRKCD,GJB6,NASP,PAM,AGT,HMGCR	24hrs	Cortex
ASC	9.30665e-06	13.8169	0.0433038	GObp	GO_ESTABLISHMENT_OF_ENDOTHELIAL_BARRIER	193	4	MSN,TJP1,PDE4D,WNT7B	24hrs	Cortex
ASC	0.000874762	3.9352	0.0437381	Hallmark	HALLMARK_UV_RESPONSE_UP	193	6	CEBPG,SLC6A8,CDO1,PTPRD,PRKCD,DDX21	24hrs	Cortex
ASC	6.74198e-05	5.97848	0.0454409	Reactome	REACTOME_PPARA_ACTIVATES_GENE_EXPRESSION	193	6	HMGCS1,TEAD1,MED13L,WWTR1,AGT,HMGCR	24hrs	Cortex
ASC	0.000258336	3.83803	0.0480504	Kegg	KEGG_REGULATION_OF_ACTIN_CYTOSKELETON	193	8	MSN,ROCK2,IQGAP1,FGFR1,PTK2,ITGAV,ARHGEF12,FGFR2	24hrs	Cortex
ASC	1.05154e-05	9.96413	0.0489282	GObp	GO_INTERACTION_WITH_SYMBIONT	193	5	JUN,APOE,DDB1,CHD1,PTX3	24hrs	Cortex
END	8.30244e-11	3.8739	3.86313e-07	GObp	GO_CARDIOVASCULAR_SYSTEM_DEVELOPMENT	190	29	JUN,MYH9,CAV1,GJA1,SPARC,APOE,ADAMTS1,COL4A1,NUS1,COL4A2,INSR,SOX17,MMRN2,SMAD1,PRICKLE1,NRP1,RASIP1,ADAMTS6,EGR1,ITGB1,PTN,CDH5,MYH10,KCNJ8,FGFR2,RHOJ,PAM,ZFAND5,PLXND1	24hrs	Cortex
END	8.30244e-11	3.8739	3.86313e-07	GObp	GO_CIRCULATORY_SYSTEM_DEVELOPMENT	190	29	JUN,MYH9,CAV1,GJA1,SPARC,APOE,ADAMTS1,COL4A1,NUS1,COL4A2,INSR,SOX17,MMRN2,SMAD1,PRICKLE1,NRP1,RASIP1,ADAMTS6,EGR1,ITGB1,PTN,CDH5,MYH10,KCNJ8,FGFR2,RHOJ,PAM,ZFAND5,PLXND1	24hrs	Cortex
END	1.28103e-10	4.93772	5.96062e-07	GObp	GO_VASCULATURE_DEVELOPMENT	190	22	JUN,MYH9,CAV1,GJA1,APOE,COL4A1,NUS1,COL4A2,SOX17,MMRN2,PRICKLE1,NRP1,RASIP1,ADAMTS6,EGR1,ITGB1,CDH5,MYH10,FGFR2,RHOJ,ZFAND5,PLXND1	24hrs	Cortex
END	2.3745e-09	3.19604	1.10486e-05	GObp	GO_REGULATION_OF_ANATOMICAL_STRUCTURE_MORPHOGENESIS	190	31	PSMD13,MYH9,SPARC,APOE,MSN,BCR,SCGB3A1,DDAH1,TIAM1,PALM,CFLAR,COL4A2,ABR,CDC42EP4,PTPRD,KLF4,SOX17,CDC42EP3,MMRN2,CTSH,PRICKLE1,NRP1,PTN,CSNK1E,MYH10,CST3,FGFR2,SEMA6D,WWTR1,RHOJ,PLXND1	24hrs	Cortex
END	4.88784e-09	3.54973	2.27431e-05	GObp	GO_REGULATION_OF_CELLULAR_COMPONENT_MOVEMENT	190	26	JUN,CAV1,SPARC,APOE,MSN,BCR,SWAP70,TIAM1,VTN,IGFBP3,ABR,INSR,GAS6,KLF4,TRPM4,MMRN2,CTSH,NRP1,STC1,PODXL,ITGB1,HBEGF,PTN,SEMA6D,NRG3,PLXND1	24hrs	Cortex
END	4.92589e-07	5.78947	2.46295e-05	Hallmark	HALLMARK_EPITHELIAL_MESENCHYMAL_TRANSITION	190	11	JUN,CD59,GJA1,SPARC,PVR,COL4A1,COL4A2,IGFBP3,ITGB1,TPM4,CALU	24hrs	Cortex
END	6.08301e-09	2.6738	2.83043e-05	GObp	GO_REGULATION_OF_CELL_PROLIFERATION	190	38	JUN,OSMR,SOX7,CD59,CAV1,GJA1,SPARC,APOE,NES,CTLA4,ADAMTS1,SCGB3A1,FOSL2,CFLAR,BCL2L1,IGFBP3,PPP1R9B,INSR,GAS6,KLF4,SOX17,TRPM4,CTSH,SMAD1,NRP1,ZEB1,EGR1,ITGB1,DIS3L2,HBEGF,PTN,CDH5,CRIP2,FGFR2,GNAI2,WWTR1,TFRC,GLUL	24hrs	Cortex
END	6.33663e-09	3.40372	2.94844e-05	GObp	GO_CELL_MOTILITY	190	27	MYH9,CAV1,GJA1,MSN,CCDC141,TIAM1,TNFAIP1,PPP1R9B,BSG,GAS6,SOX17,TRPM4,NRP1,PODXL,RHOC,ITGB1,ITGA6,HBEGF,MYH10,PHACTR4,SEMA6D,NRG3,ITGA9,ZFAND5,PLXND1,PLAT,NAV1	24hrs	Cortex
END	6.33663e-09	3.40372	2.94844e-05	GObp	GO_LOCALIZATION_OF_CELL	190	27	MYH9,CAV1,GJA1,MSN,CCDC141,TIAM1,TNFAIP1,PPP1R9B,BSG,GAS6,SOX17,TRPM4,NRP1,PODXL,RHOC,ITGB1,ITGA6,HBEGF,MYH10,PHACTR4,SEMA6D,NRG3,ITGA9,ZFAND5,PLXND1,PLAT,NAV1	24hrs	Cortex
END	9.10248e-09	2.63505	4.23538e-05	GObp	GO_TISSUE_DEVELOPMENT	190	38	JUN,SOX7,CAV1,GJA1,MSN,COL4A1,FOSL2,CFLAR,VTN,COL4A2,MYO7A,BSG,INSR,KLF4,SOX17,CTSH,SMAD1,PRICKLE1,NRP1,RASIP1,STC1,PODXL,ZEB1,EGR1,RHOC,ITGB1,ITGA6,HBEGF,PTN,MYH10,POU2F3,FGFR2,PHACTR4,SRGN,SEMA6D,WWTR1,ZFAND5,PLXND1	24hrs	Cortex
END	1.18144e-08	4.44444	5.49723e-05	GObp	GO_ACTIN_FILAMENT_BASED_PROCESS	190	19	ACTR3,DMD,MYH9,GJA1,DSTN,BCR,SWAP70,CFLAR,TNFAIP1,MYO7A,PPP1R9B,ABR,LIMCH1,MYO1B,ITGB1,MYH10,TPM4,PHACTR4,RHOJ	24hrs	Cortex
END	1.3179e-08	2.51826	6.13221e-05	GObp	GO_REGULATION_OF_MULTICELLULAR_ORGANISMAL_DEVELOPMENT	190	40	JUN,PSMD13,DMD,CAV1,GJA1,SPARC,APOE,BCL6B,CTLA4,ADAMTS1,TCF12,DDAH1,TIAM1,LUC7L,PALM,COL4A2,INSR,PTPRD,GAS6,KLF4,SOX17,TRPM4,MMRN2,CTSH,SMAD1,PRICKLE1,NRP1,ZEB1,EGR1,ITGB1,PTN,CDH5,KIAA1109,FGFR2,SRGN,SEMA6D,WWTR1,NRG3,ADAMTS9,PLXND1	24hrs	Cortex
END	2.5999e-07	10.8359	0.000175233	Reactome	REACTOME_SEMAPHORIN_INTERACTIONS	190	7	MYH9,NRP1,RHOC,ITGB1,MYH10,SEMA6D,PLXND1	24hrs	Cortex
END	3.98077e-08	2.72446	0.000185225	GObp	GO_MOVEMENT_OF_CELL_OR_SUBCELLULAR_COMPONENT	190	33	ACTR3,DMD,MYH9,CAV1,GJA1,MSN,CCDC141,TIAM1,PALM,TNFAIP1,MYO7A,PPP1R9B,BSG,GAS6,MYO1B,SOX17,TRPM4,NRP1,PODXL,RHOC,ITGB1,ITGA6,HBEGF,MYH10,TPM4,PHACTR4,SEMA6D,NRG3,ITGA9,ZFAND5,PLXND1,PLAT,NAV1	24hrs	Cortex
END	4.47875e-08	3.28537	0.000208396	GObp	GO_NEGATIVE_REGULATION_OF_DEVELOPMENTAL_PROCESS	190	25	CAV1,GJA1,SPARC,APOE,BCR,CTLA4,LUC7L,CFLAR,COL4A2,ABR,GAS6,KLF4,SOX17,TRPM4,MMRN2,PRICKLE1,NRP1,ZEB1,ITGB1,PTN,CST3,SRGN,SEMA6D,WWTR1,NRG3	24hrs	Cortex
END	1.13705e-07	2.96981	0.000529071	GObp	GO_ANATOMICAL_STRUCTURE_FORMATION_INVOLVED_IN_MORPHOGENESIS	190	27	JUN,DMD,SOX7,MYH9,CAV1,ADAMTS1,COL4A1,CFLAR,NUS1,VTN,COL4A2,KLF4,SOX17,MMRN2,SMAD1,PRICKLE1,NRP1,RASIP1,PODXL,ITGB1,ITGA6,MYH10,FGFR2,PHACTR4,NRG3,PLXND1,CAST	24hrs	Cortex
END	1.84917e-07	4.92871	0.000860417	GObp	GO_UROGENITAL_SYSTEM_DEVELOPMENT	190	14	ADAMTS1,COL4A1,RRM2B,SOX17,CTSH,SMAD1,NRP1,PODXL,EGR1,ITGA6,KCNJ8,FGFR2,WWTR1,NID1	24hrs	Cortex
END	1.88473e-07	3.75235	0.000876966	GObp	GO_TISSUE_MORPHOGENESIS	190	19	GJA1,MSN,COL4A1,KLF4,SOX17,CTSH,SMAD1,PRICKLE1,NRP1,RASIP1,STC1,PODXL,RHOC,ITGB1,HBEGF,PTN,FGFR2,PHACTR4,PLXND1	24hrs	Cortex
END	2.04062e-07	28.0702	0.000949502	GObp	GO_NEGATIVE_REGULATION_OF_GLYCOPROTEIN_METABOLIC_PROCESS	190	4	ITM2B,HBEGF,ITM2A,CST3	24hrs	Cortex
END	2.29106e-07	2.74024	0.00106603	GObp	GO_LOCOMOTION	190	29	MYH9,CAV1,GJA1,PVR,MSN,CCDC141,TIAM1,TNFAIP1,PPP1R9B,BSG,GAS6,SOX17,TRPM4,NRP1,PODXL,RHOC,ITGB1,ITGA6,HBEGF,MYH10,PHACTR4,SEMA6D,NRG3,ITGA9,ZFAND5,TFRC,PLXND1,PLAT,NAV1	24hrs	Cortex
END	2.17875e-05	11.6959	0.00108938	Hallmark	HALLMARK_ANGIOGENESIS	190	4	VTN,NRP1,STC1,KCNJ8	24hrs	Cortex
END	2.2308e-05	4.73684	0.0011154	Hallmark	HALLMARK_TNFA_SIGNALING_VIA_NFKB	190	9	JUN,FOSL2,CFLAR,KLF4,TSC22D1,EGR1,CCNL1,HBEGF,LITAF	24hrs	Cortex
END	2.2308e-05	4.73684	0.0011154	Hallmark	HALLMARK_HYPOXIA	190	9	JUN,MYH9,CAV1,SLC6A6,FOSL2,IGFBP3,AKAP12,STC1,PAM	24hrs	Cortex
END	2.2308e-05	4.73684	0.0011154	Hallmark	HALLMARK_MYOGENESIS	190	9	DMD,MYH9,SPARC,COL4A2,IGFBP3,ADCY9,ITGB1,HBEGF,WWTR1	24hrs	Cortex
END	4.25586e-07	4.33777	0.00198025	GObp	GO_BLOOD_VESSEL_MORPHOGENESIS	190	15	JUN,MYH9,CAV1,GJA1,APOE,COL4A1,NUS1,COL4A2,SOX17,MMRN2,NRP1,RASIP1,ITGB1,FGFR2,PLXND1	24hrs	Cortex
END	4.3599e-07	3.00394	0.00202866	GObp	GO_ORGAN_MORPHOGENESIS	190	24	JUN,CAV1,GJA1,MSN,BCR,ADAMTS1,MYO7A,ABR,BSG,INSR,SOX17,CTSH,NRP1,STC1,ZEB1,ITGA6,PTN,FGFR2,PHACTR4,WWTR1,NRG3,PAM,ZFAND5,PLXND1	24hrs	Cortex
END	5.2576e-07	3.84007	0.00244636	GObp	GO_HEART_DEVELOPMENT	190	17	JUN,GJA1,SPARC,ADAMTS1,INSR,SOX17,SMAD1,PRICKLE1,NRP1,ADAMTS6,ITGB1,PTN,MYH10,KCNJ8,FGFR2,PAM,PLXND1	24hrs	Cortex
END	5.39531e-07	2.39876	0.00251044	GObp	GO_REGULATION_OF_CELL_DIFFERENTIATION	190	34	JUN,DMD,CAV1,GJA1,APOE,BCL6B,CTLA4,ADAMTS1,TCF12,SCGB3A1,TIAM1,PALM,CFLAR,IGFBP3,PTPRD,GAS6,KLF4,SOX17,TRPM4,SMAD1,PRICKLE1,NRP1,ZEB1,ITGB1,PTN,CDH5,KIAA1109,FGFR2,SEMA6D,WWTR1,NRG3,SPOCK2,ADAMTS9,PLXND1	24hrs	Cortex
END	6.07721e-07	15.949	0.00282773	GObp	GO_RESPONSE_TO_VITAMIN_D	190	5	ADAMTS1,INSR,STC1,ITGB1,PTN	24hrs	Cortex
END	1.52759e-05	7.5188	0.00284132	Kegg	KEGG_ECM_RECEPTOR_INTERACTION	190	6	COL4A1,VTN,COL4A2,ITGB1,ITGA6,ITGA9	24hrs	Cortex
END	1.52759e-05	7.5188	0.00284132	Kegg	KEGG_SMALL_CELL_LUNG_CANCER	190	6	COL4A1,BCL2L1,COL4A2,ITGB1,ITGA6,TRAF5	24hrs	Cortex
END	5.29585e-06	4.61313	0.0035694	Reactome	REACTOME_AXON_GUIDANCE	190	11	MYH9,MSN,COL4A1,COL4A2,NRP1,RHOC,ITGB1,MYH10,SEMA6D,ITGA9,PLXND1	24hrs	Cortex
END	8.60794e-07	4.67038	0.00400527	GObp	GO_ANGIOGENESIS	190	13	JUN,MYH9,CAV1,COL4A1,NUS1,COL4A2,SOX17,MMRN2,NRP1,RASIP1,ITGB1,FGFR2,PLXND1	24hrs	Cortex
END	8.71707e-07	6.8156	0.00405605	GObp	GO_REGULATION_OF_CELL_SHAPE	190	9	MYH9,MSN,PALM,CDC42EP4,CDC42EP3,PTN,CSNK1E,MYH10,RHOJ	24hrs	Cortex
END	6.13163e-06	3.72142	0.00413272	Reactome	REACTOME_DEVELOPMENTAL_BIOLOGY	190	14	MYH9,MSN,TCF12,COL4A1,COL4A2,KLF4,MED21,NRP1,RHOC,ITGB1,MYH10,SEMA6D,ITGA9,PLXND1	24hrs	Cortex
END	2.17875e-05	11.6959	0.00472789	Biocarta	BIOCARTA_AGR_PATHWAY	190	4	JUN,DMD,ITGB1,NRG3	24hrs	Cortex
END	1.06032e-06	7.6555	0.00493365	GObp	GO_FORMATION_OF_PRIMARY_GERM_LAYER	190	8	SOX7,VTN,COL4A2,KLF4,SOX17,SMAD1,ITGB1,FGFR2	24hrs	Cortex
END	2.77186e-05	6.86499	0.00515566	Kegg	KEGG_DILATED_CARDIOMYOPATHY	190	6	DMD,ADCY9,ITGB1,ITGA6,TPM4,ITGA9	24hrs	Cortex
END	1.13525e-06	3.81907	0.00528233	GObp	GO_RESPONSE_TO_EXTRACELLULAR_STIMULUS	190	16	JUN,CAV1,SPARC,APOE,ADAMTS1,PPP1R9B,INSR,GAS6,RALB,STC1,ITGB1,ITGA6,PTN,GNAI2,TFRC,GLUL	24hrs	Cortex
END	1.23597e-06	14.2248	0.00575098	GObp	GO_CORONARY_VASCULATURE_DEVELOPMENT	190	5	PRICKLE1,NRP1,ADAMTS6,MYH10,PLXND1	24hrs	Cortex
END	1.32965e-06	2.82586	0.00618686	GObp	GO_EMBRYO_DEVELOPMENT	190	24	SOX7,MYH9,GJA1,NES,BCR,BCL2L1,TNFAIP1,VTN,COL4A2,MYO7A,ABR,KLF4,MED21,SOX17,SMAD1,PRICKLE1,NRP1,EIF2S2,ZEB1,ITGB1,MYH10,FGFR2,PHACTR4,ZFAND5	24hrs	Cortex
END	2.85657e-05	11.0803	0.00619877	Biocarta	BIOCARTA_INTEGRIN_PATHWAY	190	4	JUN,CAV1,BCR,ITGB1	24hrs	Cortex
END	1.34714e-06	8.77193	0.00626822	GObp	GO_CYTOKINESIS	190	7	ACTR3,MYH9,BCL2L1,RALB,RHOC,CHMP4B,MYH10	24hrs	Cortex
END	0.000129182	4.21053	0.00645909	Hallmark	HALLMARK_MITOTIC_SPINDLE	190	8	MYH9,BCR,TIAM1,ABR,CDC42EP4,MYH10,ARHGAP29,RAPGEF5	24hrs	Cortex
END	0.000129182	4.21053	0.00645909	Hallmark	HALLMARK_MTORC1_SIGNALING	190	8	ACTR3,PSMD13,USO1,SLC6A6,STC1,EIF2S2,HSPA9,TFRC	24hrs	Cortex
END	1.47194e-06	2.55848	0.00684893	GObp	GO_POSITIVE_REGULATION_OF_CELLULAR_COMPONENT_ORGANIZATION	190	28	JUN,ACTR3,DMD,CAV1,APOE,NES,MSN,DSTN,BCR,ADAMTS1,SWAP70,SCGB3A1,TIAM1,PALM,VTN,ABR,CDC42EP4,INSR,PTPRD,GAS6,CDC42EP3,SART3,NRP1,RALB,ITGB1,CCT2,PTN,WWTR1	24hrs	Cortex
END	1.4734e-06	3.94737	0.00685574	GObp	GO_MORPHOGENESIS_OF_AN_EPITHELIUM	190	15	GJA1,MSN,COL4A1,KLF4,SOX17,CTSH,PRICKLE1,NRP1,RASIP1,PODXL,RHOC,HBEGF,FGFR2,PHACTR4,PLXND1	24hrs	Cortex
END	1.01748e-05	7.99467	0.00685779	Reactome	REACTOME_INTEGRIN_CELL_SURFACE_INTERACTIONS	190	6	COL4A1,VTN,COL4A2,BSG,ITGB1,ITGA9	24hrs	Cortex
END	1.68495e-06	2.39938	0.00784009	GObp	GO_NEGATIVE_REGULATION_OF_RESPONSE_TO_STIMULUS	190	31	PSMD13,CD59,CAV1,GJA1,APOE,OTUD7A,BCR,PALM,CFLAR,BCL2L1,TNFAIP1,VTN,IGFBP3,ABR,RRM2B,GAS6,KLF4,SOX17,MMRN2,PRICKLE1,NRP1,EGR1,CHMP4B,ITGB1,ITGA6,CSNK1E,LITAF,PHACTR4,SEMA6D,WWTR1,PLAT	24hrs	Cortex
END	4.30061e-05	5.49882	0.00799913	Kegg	KEGG_CELL_ADHESION_MOLECULES_CAMS	190	7	PVR,CTLA4,ITGB1,ITGA6,CDH5,OCLN,ITGA9	24hrs	Cortex
END	1.90745e-06	5.5991	0.00887538	GObp	GO_CELLULAR_RESPONSE_TO_EXTRACELLULAR_STIMULUS	190	10	JUN,CAV1,ADAMTS1,PPP1R9B,GAS6,RALB,ITGB1,ITGA6,PTN,GLUL	24hrs	Cortex
END	2.22564e-06	5.51116	0.0103559	GObp	GO_RESPONSE_TO_NUTRIENT	190	10	CAV1,SPARC,ADAMTS1,INSR,GAS6,STC1,ITGB1,PTN,GNAI2,TFRC	24hrs	Cortex
END	2.24015e-06	2.67709	0.0104234	GObp	GO_NEGATIVE_REGULATION_OF_MULTICELLULAR_ORGANISMAL_PROCESS	190	25	CAV1,GJA1,SPARC,APOE,BCR,CTLA4,LUC7L,VTN,COL4A2,ABR,GAS6,KLF4,SOX17,TRPM4,MMRN2,PRICKLE1,NRP1,STC1,ITGB1,PTN,CST3,SRGN,SEMA6D,NRG3,PLAT	24hrs	Cortex
END	2.81151e-06	4.90633	0.013082	GObp	GO_REGULATION_OF_CANONICAL_WNT_SIGNALING_PATHWAY	190	11	PSMD13,SOX7,CAV1,APOE,SOX17,TRPM4,PRICKLE1,EGR1,CSNK1E,FGFR2,WWTR1	24hrs	Cortex
END	2.92618e-06	7.92303	0.0136155	GObp	GO_ACTIN_FILAMENT_BASED_MOVEMENT	190	7	DMD,MYH9,GJA1,MYO7A,MYO1B,MYH10,TPM4	24hrs	Cortex
END	3.0914e-06	12.2399	0.0143843	GObp	GO_REGULATION_OF_GLYCOPROTEIN_METABOLIC_PROCESS	190	5	INSR,ITM2B,HBEGF,ITM2A,CST3	24hrs	Cortex
END	8.55167e-05	6.92521	0.0159061	Kegg	KEGG_ARRHYTHMOGENIC_RIGHT_VENTRICULAR_CARDIOMYOPATHY_ARVC	190	5	DMD,GJA1,ITGB1,ITGA6,ITGA9	24hrs	Cortex
END	3.69771e-06	2.81384	0.0172054	GObp	GO_POSITIVE_REGULATION_OF_CELL_DIFFERENTIATION	190	22	JUN,DMD,GJA1,APOE,ADAMTS1,TCF12,SCGB3A1,TIAM1,PALM,IGFBP3,PTPRD,GAS6,SOX17,TRPM4,SMAD1,NRP1,ZEB1,ITGB1,PTN,CDH5,WWTR1,ADAMTS9	24hrs	Cortex
END	3.78434e-06	2.48871	0.0176085	GObp	GO_POSITIVE_REGULATION_OF_DEVELOPMENTAL_PROCESS	190	27	JUN,DMD,GJA1,APOE,ADAMTS1,TCF12,SCGB3A1,DDAH1,TIAM1,PALM,IGFBP3,INSR,PTPRD,GAS6,SOX17,TRPM4,CTSH,SMAD1,NRP1,ZEB1,EGR1,ITGB1,PTN,CDH5,FGFR2,WWTR1,ADAMTS9	24hrs	Cortex
END	4.10607e-06	16.1943	0.0191055	GObp	GO_MESODERMAL_CELL_DIFFERENTIATION	190	4	KLF4,SMAD1,ITGB1,FGFR2	24hrs	Cortex
END	4.10607e-06	16.1943	0.0191055	GObp	GO_CELLULAR_RESPONSE_TO_VITAMIN	190	4	ADAMTS1,GAS6,ITGB1,PTN	24hrs	Cortex
END	4.34254e-06	7.5188	0.0202059	GObp	GO_RESPONSE_TO_VITAMIN	190	7	SPARC,ADAMTS1,INSR,GAS6,STC1,ITGB1,PTN	24hrs	Cortex
END	4.35719e-06	5.70704	0.020274	GObp	GO_REGULATION_OF_EPITHELIAL_CELL_MIGRATION	190	9	JUN,SPARC,APOE,KLF4,MMRN2,CTSH,NRP1,STC1,HBEGF	24hrs	Cortex
END	4.98777e-06	2.11584	0.0232081	GObp	GO_POSITIVE_REGULATION_OF_MOLECULAR_FUNCTION	190	36	JUN,PSMD13,DMD,SOX7,CAV1,APOE,TBC1D9,BCR,TIAM1,CFLAR,VTN,IGFBP3,ABR,CDC42EP4,INSR,GAS6,KLF4,CDC42EP3,CTSH,ADCY9,NRP1,RALB,RHOC,ITGB1,CCT2,CCNL1,ITGA6,HBEGF,ARHGAP29,FGFR2,PHACTR4,TRAF5,GNAI2,NRG3,RAPGEF5,PLXND1	24hrs	Cortex
END	5.07911e-06	3.41625	0.0236331	GObp	GO_SENSORY_ORGAN_DEVELOPMENT	190	16	JUN,GJA1,SPARC,NES,BCR,COL4A1,MYO7A,ABR,KLF4,NRP1,ZEB1,PTN,MYH10,FGFR2,PHACTR4,RHOJ	24hrs	Cortex
END	0.000134146	4.18958	0.0249511	Kegg	KEGG_FOCAL_ADHESION	190	8	JUN,CAV1,COL4A1,VTN,COL4A2,ITGB1,ITGA6,ITGA9	24hrs	Cortex
END	5.73886e-06	3.2418	0.0267029	GObp	GO_REGULATION_OF_CELL_MORPHOGENESIS	190	17	MYH9,SPARC,APOE,MSN,TIAM1,PALM,CDC42EP4,PTPRD,CDC42EP3,NRP1,PTN,CSNK1E,MYH10,SEMA6D,WWTR1,RHOJ,PLXND1	24hrs	Cortex
END	5.99998e-06	8.65177	0.0279179	GObp	GO_POSITIVE_REGULATION_OF_PROTEIN_BINDING	190	6	CAV1,TIAM1,VTN,NRP1,RALB,PLXND1	24hrs	Cortex
END	0.000159421	6.19195	0.0296524	Kegg	KEGG_HYPERTROPHIC_CARDIOMYOPATHY_HCM	190	5	DMD,ITGB1,ITGA6,TPM4,ITGA9	24hrs	Cortex
END	6.54918e-06	2.28667	0.0304733	GObp	GO_RESPONSE_TO_OXYGEN_CONTAINING_COMPOUND	190	30	JUN,CAV1,GJA1,SPARC,APOE,MSN,BCR,ADAMTS1,COL4A1,TIAM1,BCL2L1,ABR,BSG,INSR,GAS6,KLF4,CTSH,ADCY9,STC1,PLSCR4,ZEB1,EGR1,ITGB1,PTN,LITAF,KCNJ8,GNAI2,PAM,TFRC,GLUL	24hrs	Cortex
END	7.18555e-06	4.15512	0.0334343	GObp	GO_EXTRACELLULAR_STRUCTURE_ORGANIZATION	190	12	SPARC,COL4A1,VTN,COL4A2,BSG,GAS6,ITGB1,ITGA6,CST3,ITGA9,NID1,SPOCK2	24hrs	Cortex
END	0.000669212	3.68421	0.0334606	Hallmark	HALLMARK_COMPLEMENT	190	7	CD59,COL4A2,CTSH,ZEB1,GNAI2,SPOCK2,PLAT	24hrs	Cortex
END	0.000669212	3.68421	0.0334606	Hallmark	HALLMARK_KRAS_SIGNALING_UP	190	7	IGFBP3,AKAP12,KLF4,NRP1,HBEGF,TSPAN13,PLAT	24hrs	Cortex
END	7.19311e-06	8.42105	0.0334695	GObp	GO_ARTERY_DEVELOPMENT	190	6	APOE,PRICKLE1,NRP1,ADAMTS6,MYH10,PLXND1	24hrs	Cortex
END	7.45604e-06	2.69591	0.034693	GObp	GO_RESPONSE_TO_NITROGEN_COMPOUND	190	22	GSTM1,JUN,CAV1,GJA1,SPARC,COL4A1,TIAM1,BCL2L1,PPP1R9B,BSG,INSR,RRM2B,KLF4,SMAD1,ADCY9,RALB,STC1,ZEB1,EGR1,PTN,KCNJ8,GNAI2	24hrs	Cortex
END	7.62551e-06	10.5263	0.0354815	GObp	GO_RHO_PROTEIN_SIGNAL_TRANSDUCTION	190	5	CDC42EP4,CDC42EP3,ARHGAP29,PHACTR4,RHOJ	24hrs	Cortex
END	7.72642e-06	3.30886	0.035951	GObp	GO_ENDOCYTOSIS	190	16	ACTR3,MYH9,CAV1,SPARC,APOE,LRP1B,BCL2L1,VTN,MYO7A,CD93,GAS6,TINAGL1,ITGB1,CSNK1E,NOSTRIN,TFRC	24hrs	Cortex
END	8.50727e-06	4.40264	0.0395843	GObp	GO_NEGATIVE_REGULATION_OF_LOCOMOTION	190	11	APOE,BCR,IGFBP3,ABR,KLF4,MMRN2,NRP1,STC1,PTN,SEMA6D,NRG3	24hrs	Cortex
END	8.57695e-06	8.20232	0.0399086	GObp	GO_ACTOMYOSIN_STRUCTURE_ORGANIZATION	190	6	MYH9,CFLAR,TNFAIP1,LIMCH1,ITGB1,MYH10	24hrs	Cortex
END	8.83932e-06	4.38596	0.0411293	GObp	GO_CELLULAR_RESPONSE_TO_EXTERNAL_STIMULUS	190	11	JUN,CAV1,GJA1,ADAMTS1,PPP1R9B,GAS6,RALB,ITGB1,ITGA6,PTN,GLUL	24hrs	Cortex
END	8.86198e-06	4.0747	0.0412348	GObp	GO_REGULATION_OF_WNT_SIGNALING_PATHWAY	190	12	PSMD13,SOX7,CAV1,APOE,TIAM1,SOX17,TRPM4,PRICKLE1,EGR1,CSNK1E,FGFR2,WWTR1	24hrs	Cortex
END	0.000229978	3.89864	0.0427759	Kegg	KEGG_REGULATION_OF_ACTIN_CYTOSKELETON	190	8	MYH9,MSN,TIAM1,ITGB1,ITGA6,MYH10,FGFR2,ITGA9	24hrs	Cortex
END	9.30373e-06	5.88885	0.0432902	GObp	GO_RAS_PROTEIN_SIGNAL_TRANSDUCTION	190	8	JUN,TIAM1,CDC42EP4,CDC42EP3,RALB,ARHGAP29,PHACTR4,RHOJ	24hrs	Cortex
END	0.000891231	3.92285	0.0445616	Hallmark	HALLMARK_APOPTOSIS	190	6	GSTM1,JUN,CAV1,CFLAR,BCL2L1,PLAT	24hrs	Cortex
END	9.59083e-06	2.90276	0.0446261	GObp	GO_ENZYME_LINKED_RECEPTOR_PROTEIN_SIGNALING_PATHWAY	190	19	JUN,ACTR3,BCR,TIAM1,INSR,PTPRD,GAS6,SMAD1,NRP1,REPS2,EGR1,ITGB1,HBEGF,PTN,CDH5,FGFR2,NRG3,ZFAND5,PLAT	24hrs	Cortex
END	1.03328e-05	2.71563	0.0480786	GObp	GO_POSITIVE_REGULATION_OF_CELL_PROLIFERATION	190	21	JUN,OSMR,CD59,CAV1,NES,FOSL2,BCL2L1,INSR,GAS6,TRPM4,CTSH,NRP1,EGR1,ITGB1,HBEGF,PTN,CRIP2,FGFR2,GNAI2,WWTR1,GLUL	24hrs	Cortex
INT.Dlk1	2.28416e-05	8.6949	0.0153952	Reactome	REACTOME_SIGNALLING_BY_NGF	53	5	AP2A2,MEF2C,PDE1A,MAGED1,ADCY8	24hrs	Cortex
INT.Dlk1	3.08868e-05	11.0178	0.0208177	Reactome	REACTOME_NGF_SIGNALLING_VIA_TRKA_FROM_THE_PLASMA_MEMBRANE	53	4	AP2A2,MEF2C,PDE1A,ADCY8	24hrs	Cortex
INT.Dlk1	7.74696e-06	14.6547	0.0360466	GObp	GO_REGULATION_OF_CIRCADIAN_RHYTHM	53	4	ROCK2,MAGED1,RORB,ZFHX3	24hrs	Cortex
INT.Nrip3	1.79777e-05	12.1212	0.000898883	Hallmark	HALLMARK_G2M_CHECKPOINT	33	4	MEIS2,YTHDC1,NCL,MARCKS	24hrs	Cortex
INT.Nrip3	1.19367e-06	4.75511	0.00555413	GObp	GO_NEUROGENESIS	33	11	BCL11A,TCF4,FRY,CDK5R1,PTPRD,APC,HSP90AA1,LMO4,PBX1,NRG3,MARCKS	24hrs	Cortex
INT.Nrip3	1.48367e-06	20.202	0.00690353	GObp	GO_REGULATION_OF_DENDRITE_DEVELOPMENT	33	4	BCL11A,CDK5R1,PTPRD,MARCKS	24hrs	Cortex
INT.Nrip3	2.30226e-06	4.46828	0.0107124	GObp	GO_REGULATION_OF_CELL_DIFFERENTIATION	33	11	MEIS2,BCL11A,TCF4,PURB,CDK5R1,PTPRD,APC,LMO4,PBX1,NRG3,MARCKS	24hrs	Cortex
INT.Nrip3	9.03102e-06	10.001	0.0420213	GObp	GO_POSITIVE_REGULATION_OF_CELL_PROJECTION_ORGANIZATION	33	5	BCL11A,PTPRD,APC,HSP90AA1,MARCKS	24hrs	Cortex
Layer23	1.80789e-05	7.33138	0.0121852	Reactome	REACTOME_TRANSMISSION_ACROSS_CHEMICAL_SYNAPSES	88	6	GNG3,CAMKK1,GABRG3,GABRA1,SYN2,CACNA2D3	24hrs	Cortex
Layer23	0.000254487	5.68182	0.0127244	Hallmark	HALLMARK_TNFA_SIGNALING_VIA_NFKB	88	5	GADD45B,CDKN1A,PNRC1,PMEPA1,KLF10	24hrs	Cortex
Layer23	3.17723e-05	5.70218	0.0214145	Reactome	REACTOME_NEURONAL_SYSTEM	88	7	GNG3,CAMKK1,GABRG3,GABRA1,SYN2,CACNA2D3,KCNK2	24hrs	Cortex
NeuroG1	1.69095e-06	8.29286	0.007868	GObp	GO_RNA_SPLICING	46	7	RBM4B,DDX46,DHX32,SYNCRIP,IVNS1ABP,SFPQ,CPSF2	24hrs	Cortex
NeuroG1	5.64376e-06	7.04509	0.0262604	GObp	GO_MRNA_PROCESSING	46	7	RBM4B,DDX46,DHX32,SYNCRIP,RNASEL,SFPQ,CPSF2	24hrs	Cortex
NeuroG1	8.76503e-06	5.69273	0.0407837	GObp	GO_MRNA_METABOLIC_PROCESS	46	8	SMG1,RBM4B,DDX46,DHX32,SYNCRIP,RNASEL,SFPQ,CPSF2	24hrs	Cortex
NeuroG2	2.7708e-06	17.316	0.00186752	Reactome	REACTOME_TRANSCRIPTION	22	4	H3F3B,POLR2I,H2AFZ,POLR2C	24hrs	Cortex
NeuroG2	2.90247e-06	17.1527	0.0135052	GObp	GO_GENE_SILENCING	22	4	H3F3B,POLR2I,H2AFZ,POLR2C	24hrs	Cortex
ODC	4.45998e-05	5.46875	0.00222999	Hallmark	HALLMARK_MTORC1_SIGNALING	128	7	PSMD13,USO1,ETF1,GTF2H1,CYP51A1,HMGCS1,ADD3	24hrs	Cortex
ODC	0.000112306	8.44595	0.00561531	Hallmark	HALLMARK_CHOLESTEROL_HOMEOSTASIS	128	4	FABP5,FASN,CYP51A1,HMGCS1	24hrs	Cortex
ODC	0.000306789	4.6875	0.0153394	Hallmark	HALLMARK_ESTROGEN_RESPONSE_EARLY	128	6	SLC24A3,ENDOD1,TIPARP,FASN,INPP5F,ADD3	24hrs	Cortex
ODC	8.82558e-06	14.2045	0.0410654	GObp	GO_BODY_MORPHOGENESIS	128	4	BRAF,ZNF281,TIPARP,PLEKHA1	24hrs	Cortex
OPC	3.58359e-05	6.59341	0.0017918	Hallmark	HALLMARK_KRAS_SIGNALING_UP	91	6	AKAP12,NIN,TRIB1,HBEGF,ST6GAL1,GADD45G	24hrs	Cortex
OPC	9.80079e-05	8.70417	0.0049004	Hallmark	HALLMARK_ANDROGEN_RESPONSE	91	4	AKAP12,DBI,PMEPA1,ITGAV	24hrs	Cortex
OPC	0.000305361	5.49451	0.015268	Hallmark	HALLMARK_TNFA_SIGNALING_VIA_NFKB	91	5	TRIB1,PMEPA1,HBEGF,MCL1,VEGFA	24hrs	Cortex
OPC	0.000305361	5.49451	0.015268	Hallmark	HALLMARK_EPITHELIAL_MESENCHYMAL_TRANSITION	91	5	PMEPA1,COL16A1,DST,ITGAV,VEGFA	24hrs	Cortex
OPC	7.96206e-06	2.83684	0.0370475	GObp	GO_REGULATION_OF_CELL_DEATH	91	19	LIMS2,APOE,NCL,ABR,DDB1,ARHGEF12,GAS6,SKIL,HSPH1,ITGAV,MCL1,ST6GAL1,DNMT3A,VEGFA,MAGED1,GADD45G,NOS1AP,SOX8,VCP	24hrs	Cortex
PER	2.81909e-08	11.5942	1.40955e-06	Hallmark	HALLMARK_EPITHELIAL_MESENCHYMAL_TRANSITION	69	8	SERPINE1,SPARC,COL4A1,COL4A2,COL5A3,MGP,TPM4,MYL9	24hrs	Cortex
PER	5.94034e-06	8.65239	0.0011049	Kegg	KEGG_FOCAL_ADHESION	69	6	COL4A1,LAMB1,COL4A2,COL5A3,FLT1,MYL9	24hrs	Cortex
PER	1.05441e-05	13.8026	0.00196121	Kegg	KEGG_ECM_RECEPTOR_INTERACTION	69	4	COL4A1,LAMB1,COL4A2,COL5A3	24hrs	Cortex
PER	1.05441e-05	13.8026	0.00196121	Kegg	KEGG_SMALL_CELL_LUNG_CANCER	69	4	COL4A1,LAMB1,COL4A2,TRAF5	24hrs	Cortex
PER	1.0753e-05	5.03609	0.00724752	Reactome	REACTOME_METABOLISM_OF_PROTEINS	69	9	EIF5B,EEF1D,EIF2B4,HSPA9,SRP54,MGAT2,GALNT2,RPN2,CCT6A	24hrs	Cortex
PER	2.37771e-06	8.08361	0.0110635	GObp	GO_OSSIFICATION	69	7	TWSG1,SPARC,LIMD1,STC1,PTN,MGP,TPM4	24hrs	Cortex
PER	2.50839e-05	6.92881	0.0169065	Reactome	REACTOME_AXON_GUIDANCE	69	6	MYH9,COL4A1,LAMB1,COL4A2,ARHGEF12,MYL9	24hrs	Cortex
PER	0.000636315	5.7971	0.0318157	Hallmark	HALLMARK_MTORC1_SIGNALING	69	4	STC1,HSPA9,SERP1,CCT6A	24hrs	Cortex
PER	7.80074e-06	14.6762	0.0362969	GObp	GO_MULTICELLULAR_ORGANISMAL_MACROMOLECULE_METABOLIC_PROCESS	69	4	COL4A1,CTSB,COL4A2,COL5A3	24hrs	Cortex
PER	8.29866e-06	14.4928	0.0386137	GObp	GO_NEGATIVE_REGULATION_OF_VASCULATURE_DEVELOPMENT	69	4	SERPINE1,SPARC,COL4A2,PTN	24hrs	Cortex
PER	9.72096e-06	6.67429	0.0452316	GObp	GO_EXTRACELLULAR_STRUCTURE_ORGANIZATION	69	7	SERPINE1,SPARC,COL4A1,LAMB1,HSD17B12,COL4A2,COL5A3	24hrs	Cortex
PIR	2.7221e-07	16.3452	0.00126659	GObp	GO_POSITIVE_REGULATION_OF_NERVOUS_SYSTEM_DEVELOPMENT	14	5	NRXN1,NRXN3,MAP1B,SEMA3A,GOLGA4	24hrs	Cortex
PIR	2.7649e-07	11.4286	0.00128651	GObp	GO_REGULATION_OF_NERVOUS_SYSTEM_DEVELOPMENT	14	6	PTPRF,NRXN1,NRXN3,MAP1B,SEMA3A,GOLGA4	24hrs	Cortex
PIR	9.93101e-07	13.1062	0.0046209	GObp	GO_NEURON_PROJECTION_DEVELOPMENT	14	5	PTPRF,NRXN1,NRXN3,MAP1B,SEMA3A	24hrs	Cortex
PIR	1.13953e-06	12.8008	0.00530221	GObp	GO_REGULATION_OF_CELL_PROJECTION_ORGANIZATION	14	5	PTPRF,NRXN1,MAP1B,SEMA3A,GOLGA4	24hrs	Cortex
PIR	3.58452e-06	15.528	0.0166788	GObp	GO_CELL_MORPHOGENESIS_INVOLVED_IN_NEURON_DIFFERENTIATION	14	4	NRXN1,NRXN3,MAP1B,SEMA3A	24hrs	Cortex
PIR	3.81248e-06	10.3972	0.0177395	GObp	GO_NEURON_DEVELOPMENT	14	5	PTPRF,NRXN1,NRXN3,MAP1B,SEMA3A	24hrs	Cortex
PIR	5.51723e-06	14.2146	0.0256717	GObp	GO_NEURON_PROJECTION_MORPHOGENESIS	14	4	NRXN1,NRXN3,MAP1B,SEMA3A	24hrs	Cortex
PIR	5.93009e-06	14.0056	0.0275927	GObp	GO_REGULATION_OF_NEURON_PROJECTION_DEVELOPMENT	14	4	PTPRF,MAP1B,SEMA3A,GOLGA4	24hrs	Cortex
PIR	7.15078e-06	13.4771	0.0332726	GObp	GO_SYNAPTIC_SIGNALING	14	4	PTPRF,NRXN1,NRXN3,GRM7	24hrs	Cortex
aMG	2.32825e-08	14.5833	1.16412e-06	Hallmark	HALLMARK_TNFA_SIGNALING_VIA_NFKB	48	7	JUNB,PLEK,RHOB,IER3,CXCL10,SOCS3,PPP1R15A	24hrs	Hip
aMG	1.96193e-05	12.0773	0.000980965	Hallmark	HALLMARK_COAGULATION	48	4	C1QA,PLEK,DUSP6,TF	24hrs	Hip
aMG	0.000114858	8.33333	0.00574292	Hallmark	HALLMARK_KRAS_SIGNALING_UP	48	4	CXCL10,CD37,PPP1R15A,DUSP6	24hrs	Hip
aMG	5.54879e-06	8.62069	0.0258185	GObp	GO_VIRAL_LIFE_CYCLE	48	6	RANBP2,F11R,TPR,SELPLG,UBC,EIF3A	24hrs	Hip
aMG	5.65749e-06	7.06215	0.0263243	GObp	GO_RESPONSE_TO_RADIATION	48	7	JUNB,RHOB,JUND,F11R,CXCL10,SOCS3,PPP1R15A	24hrs	Hip
ASC	1.5291e-26	27.7778	7.11489e-23	GObp	GO_OXIDATIVE_PHOSPHORYLATION	180	21	NDUFA11,UQCR10,NDUFB2,COX6B1,COX7B,COX4I1,NDUFB9,COX6C,NDUFC2-KCTD14,NDUFC2,COX5B,CHCHD10,COX7C,UQCR11,UQCRC1,NDUFA12,NDUFA3,NDUFB8,NDUFA8,COX6A1,NDUFB4	24hrs	Hip
ASC	8.95867e-24	23.6407	4.16847e-20	GObp	GO_ELECTRON_TRANSPORT_CHAIN	180	20	NDUFA11,UQCR10,NDUFB2,COX6B1,COX7B,COX4I1,NDUFB9,COX6C,NDUFC2-KCTD14,NDUFC2,COX5B,COX7C,UQCR11,UQCRC1,NDUFA12,NDUFA3,NDUFB8,NDUFA8,COX6A1,NDUFB4	24hrs	Hip
ASC	2.83663e-22	25.3165	1.91189e-19	Reactome	REACTOME_RESPIRATORY_ELECTRON_TRANSPORT	180	18	NDUFA11,NDUFB2,COX6B1,COX7B,COX4I1,NDUFB9,COX6C,NDUFC2,COX5B,COX7C,UQCR11,UQCRC1,NDUFA12,NDUFA3,NDUFB8,NDUFA8,COX6A1,NDUFB4	24hrs	Hip
ASC	2.84702e-20	16.4609	5.29546e-18	Kegg	KEGG_OXIDATIVE_PHOSPHORYLATION	180	20	NDUFA11,UQCR10,NDUFB2,COX7A2,COX6B1,COX7B,COX4I1,NDUFB9,COX6C,NDUFC2,COX5B,COX7C,ATP6V0E1,UQCR11,UQCRC1,NDUFA3,NDUFB8,NDUFA8,COX6A1,NDUFB4	24hrs	Hip
ASC	2.40183e-20	20.4082	1.61883e-17	Reactome	REACTOME_RESPIRATORY_ELECTRON_TRANSPORT_ATP_SYNTHESIS_BY_CHEMIOSMOTIC_COUPLING_AND_HEAT_PRODUCTION_BY_UNCOUPLING_PROTEINS_	180	18	NDUFA11,NDUFB2,COX6B1,COX7B,COX4I1,NDUFB9,COX6C,NDUFC2,COX5B,COX7C,UQCR11,UQCRC1,NDUFA12,NDUFA3,NDUFB8,NDUFA8,COX6A1,NDUFB4	24hrs	Hip
ASC	7.29451e-20	15.7604	4.9165e-17	Reactome	REACTOME_TCA_CYCLE_AND_RESPIRATORY_ELECTRON_TRANSPORT	180	20	NDUFA11,NDUFB2,COX6B1,BSG,COX7B,COX4I1,NDUFB9,COX6C,NDUFC2,COX5B,COX7C,LDHB,UQCR11,UQCRC1,NDUFA12,NDUFA3,NDUFB8,NDUFA8,COX6A1,NDUFB4	24hrs	Hip
ASC	7.58447e-18	11.6667	3.79223e-16	Hallmark	HALLMARK_OXIDATIVE_PHOSPHORYLATION	180	21	UQCR10,NDUFB2,COX7A2,COX6B1,COX7B,COX4I1,COX6C,NDUFC2,COX5B,COX7C,ATP6V0E1,LDHB,UQCR11,UQCRC1,NDUFA3,NDUFB8,NDUFA8,COX6A1,ECHS1,ACAA1,NDUFB4	24hrs	Hip
ASC	9.88158e-20	15.54	4.5979e-16	GObp	GO_CELLULAR_RESPIRATION	180	20	NDUFA11,UQCR10,NDUFB2,COX6B1,COX7B,COX4I1,NDUFB9,COX6C,NDUFC2-KCTD14,NDUFC2,COX5B,COX7C,UQCR11,UQCRC1,NDUFA12,NDUFA3,NDUFB8,NDUFA8,COX6A1,NDUFB4	24hrs	Hip
ASC	1.93553e-19	11.7768	9.00601e-16	GObp	GO_ENERGY_DERIVATION_BY_OXIDATION_OF_ORGANIC_COMPOUNDS	180	23	PYGB,NDUFA11,MT3,UQCR10,NDUFB2,COX6B1,COX7B,COX4I1,NDUFB9,COX6C,NDUFC2-KCTD14,NDUFC2,COX5B,COX7C,UBA52,UQCR11,UQCRC1,NDUFA12,NDUFA3,NDUFB8,NDUFA8,COX6A1,NDUFB4	24hrs	Hip
ASC	1.01776e-17	15.0376	1.89303e-15	Kegg	KEGG_PARKINSONS_DISEASE	180	18	UQCR10,NDUFB2,COX7A2,COX6B1,COX7B,COX4I1,NDUFB9,COX6C,NDUFC2,COX5B,COX7C,UQCR11,UQCRC1,NDUFA3,NDUFB8,NDUFA8,COX6A1,NDUFB4	24hrs	Hip
ASC	6.23288e-19	11.2086	2.90016e-15	GObp	GO_NUCLEOSIDE_TRIPHOSPHATE_METABOLIC_PROCESS	180	23	NDUFA11,UQCR10,NDUFB2,COX6B1,ALDOC,COX7B,COX4I1,RHOQ,NDUFB9,COX6C,NDUFC2-KCTD14,NDUFC2,COX5B,CHCHD10,COX7C,UQCR11,UQCRC1,NDUFA12,NDUFA3,NDUFB8,NDUFA8,COX6A1,NDUFB4	24hrs	Hip
ASC	1.33157e-18	9.51294	6.19577e-15	GObp	GO_GENERATION_OF_PRECURSOR_METABOLITES_AND_ENERGY	180	25	PYGB,NDUFA11,MT3,UQCR10,NDUFB2,COX6B1,ALDOC,COX7B,COX4I1,NDUFB9,COX6C,NDUFC2-KCTD14,NDUFC2,COX5B,CHCHD10,COX7C,UBA52,UQCR11,UQCRC1,NDUFA12,NDUFA3,NDUFB8,NDUFA8,COX6A1,NDUFB4	24hrs	Hip
ASC	1.88599e-18	10.6927	8.77552e-15	GObp	GO_NUCLEOSIDE_MONOPHOSPHATE_METABOLIC_PROCESS	180	23	NDUFA11,UQCR10,NDUFB2,COX6B1,ALDOC,COX7B,COX4I1,NDUFB9,COX6C,NDUFC2-KCTD14,NDUFC2,COX5B,MAGI3,CHCHD10,COX7C,UQCR11,UQCRC1,NDUFA12,NDUFA3,NDUFB8,NDUFA8,COX6A1,NDUFB4	24hrs	Hip
ASC	6.0248e-17	12.4918	1.12061e-14	Kegg	KEGG_ALZHEIMERS_DISEASE	180	19	APOE,UQCR10,NDUFB2,COX7A2,COX6B1,COX7B,COX4I1,NDUFB9,COX6C,NDUFC2,COX5B,COX7C,UQCR11,UQCRC1,NDUFA3,NDUFB8,NDUFA8,COX6A1,NDUFB4	24hrs	Hip
ASC	3.61258e-16	11.4114	6.7194e-14	Kegg	KEGG_HUNTINGTONS_DISEASE	180	19	BDNF,UQCR10,NDUFB2,COX7A2,COX6B1,COX7B,COX4I1,NDUFB9,COX6C,NDUFC2,COX5B,COX7C,UQCR11,UQCRC1,NDUFA3,NDUFB8,NDUFA8,COX6A1,NDUFB4	24hrs	Hip
ASC	2.01904e-15	7.0502	9.39461e-12	GObp	GO_PURINE_CONTAINING_COMPOUND_METABOLIC_PROCESS	180	25	NDUFA11,UQCR10,NDUFB2,PDE4B,COX6B1,ALDOC,COX7B,COX4I1,RHOQ,NDUFB9,COX6C,NDUFC2-KCTD14,NDUFC2,COX5B,MAGI3,CHCHD10,COX7C,UQCR11,UQCRC1,NDUFA12,NDUFA3,NDUFB8,NDUFA8,COX6A1,NDUFB4	24hrs	Hip
ASC	3.75188e-15	7.24638	1.74575e-11	GObp	GO_GLYCOSYL_COMPOUND_METABOLIC_PROCESS	180	24	NDUFA11,UQCR10,NDUFB2,COX6B1,ALDOC,COX7B,COX4I1,RHOQ,NDUFB9,COX6C,NDUFC2-KCTD14,NDUFC2,COX5B,MAGI3,CHCHD10,COX7C,UQCR11,UQCRC1,NDUFA12,NDUFA3,NDUFB8,NDUFA8,COX6A1,NDUFB4	24hrs	Hip
ASC	5.27287e-14	5.60748	2.45346e-10	GObp	GO_NUCLEOBASE_CONTAINING_SMALL_MOLECULE_METABOLIC_PROCESS	180	27	NDUFA11,UQCR10,NDUFB2,PDE4B,COX6B1,ALDOC,COX7B,COX4I1,RHOQ,NDUFB9,COX6C,NDUFC2-KCTD14,NDUFC2,COX5B,MAGI3,CHCHD10,COX7C,LDHB,UQCR11,UQCRC1,NDUFA12,NDUFA3,NDUFB8,NDUFA8,COX6A1,ENTPD2,NDUFB4	24hrs	Hip
ASC	7.74945e-14	26.455	3.60582e-10	GObp	GO_MITOCHONDRIAL_ELECTRON_TRANSPORT_NADH_TO_UBIQUINONE	180	10	NDUFA11,NDUFB2,NDUFB9,NDUFC2-KCTD14,NDUFC2,NDUFA12,NDUFA3,NDUFB8,NDUFA8,NDUFB4	24hrs	Hip
ASC	6.91073e-12	15.2778	1.2854e-09	Kegg	KEGG_CARDIAC_MUSCLE_CONTRACTION	180	11	UQCR10,COX7A2,COX6B1,COX7B,COX4I1,COX6C,COX5B,COX7C,UQCR11,UQCRC1,COX6A1	24hrs	Hip
ASC	4.45599e-13	48.6111	2.07337e-09	GObp	GO_MITOCHONDRIAL_ELECTRON_TRANSPORT_CYTOCHROME_C_TO_OXYGEN	180	7	COX6B1,COX7B,COX4I1,COX6C,COX5B,COX7C,COX6A1	24hrs	Hip
ASC	4.57663e-12	3.95942	2.1295e-08	GObp	GO_OXIDATION_REDUCTION_PROCESS	180	32	PYGB,NDUFA11,MT3,UQCR10,NDUFB2,COX6B1,ALDOC,COX7B,HIGD2A,COX4I1,NDUFB9,COX6C,NDUFC2-KCTD14,NDUFC2,COX5B,MGST1,COX7C,UBA52,JMJD1C,LDHB,ALDH2,UQCR11,TECR,UQCRC1,NDUFA12,NDUFA3,NDUFB8,NDUFA8,COX6A1,ECHS1,ACAA1,NDUFB4	24hrs	Hip
ASC	1.42597e-11	12.4611	6.63502e-08	GObp	GO_HYDROGEN_ION_TRANSMEMBRANE_TRANSPORT	180	12	UQCR10,COX7A2,COX6B1,COX7B,COX4I1,COX6C,COX5B,COX7C,ATP6V0E1,UQCR11,UQCRC1,COX6A1	24hrs	Hip
ASC	6.75188e-11	17.8571	3.14165e-07	GObp	GO_MITOCHONDRIAL_RESPIRATORY_CHAIN_COMPLEX_I_BIOGENESIS	180	9	NDUFA11,NDUFB2,NDUFB9,NDUFC2,NDUFA12,NDUFA3,NDUFB8,NDUFA8,NDUFB4	24hrs	Hip
ASC	6.75188e-11	17.8571	3.14165e-07	GObp	GO_MITOCHONDRIAL_RESPIRATORY_CHAIN_COMPLEX_I_ASSEMBLY	180	9	NDUFA11,NDUFB2,NDUFB9,NDUFC2,NDUFA12,NDUFA3,NDUFB8,NDUFA8,NDUFB4	24hrs	Hip
ASC	6.75188e-11	17.8571	3.14165e-07	GObp	GO_NADH_DEHYDROGENASE_COMPLEX_ASSEMBLY	180	9	NDUFA11,NDUFB2,NDUFB9,NDUFC2,NDUFA12,NDUFA3,NDUFB8,NDUFA8,NDUFB4	24hrs	Hip
ASC	7.44187e-11	3.76648	3.4627e-07	GObp	GO_ORGANOPHOSPHATE_METABOLIC_PROCESS	180	30	NDUFA11,UQCR10,NDUFB2,PDE4B,COX6B1,ALDOC,COX7B,COX4I1,RHOQ,NDUFB9,COX6C,NDUFC2-KCTD14,NDUFC2,COX5B,MAGI3,CHCHD10,COX7C,LDHB,ABHD3,UQCR11,UQCRC1,NDUFA12,NDUFA3,NDUFB8,EFR3B,NDUFA8,COX6A1,ENTPD2,LCAT,NDUFB4	24hrs	Hip
ASC	7.95942e-11	14.6199	3.70352e-07	GObp	GO_MITOCHONDRIAL_RESPIRATORY_CHAIN_COMPLEX_ASSEMBLY	180	10	NDUFA11,UQCR10,NDUFB2,NDUFB9,NDUFC2,NDUFA12,NDUFA3,NDUFB8,NDUFA8,NDUFB4	24hrs	Hip
ASC	3.36753e-10	2.70389	1.56691e-06	GObp	GO_SMALL_MOLECULE_METABOLIC_PROCESS	180	43	NDUFA11,PMM1,APOE,ACSBG1,MT3,UQCR10,NDUFB2,PDE4B,COX6B1,BSG,ALDOC,TST,COX7B,COX4I1,RHOQ,NDUFB9,COX6C,NDUFC2-KCTD14,NDUFC2,COX5B,MAGI3,CHCHD10,COX7C,LDHB,ABHD3,ALDH2,UQCR11,MIF,TECR,UQCRC1,NDUFA12,GADL1,NDUFA3,NDUFB8,NDUFA8,GLUL,COX6A1,ENTPD2,ECHS1,CKB,LCAT,ACAA1,NDUFB4	24hrs	Hip
ASC	3.3686e-08	6.66667	1.6843e-06	Hallmark	HALLMARK_ADIPOGENESIS	180	12	APOE,UQCR10,TST,COX7B,CHCHD10,REEP5,ALDH2,UQCR11,UQCRC1,SORBS1,COX6A1,ECHS1	24hrs	Hip
ASC	3.99348e-10	9.59233	1.85817e-06	GObp	GO_HYDROGEN_TRANSPORT	180	12	UQCR10,COX7A2,COX6B1,COX7B,COX4I1,COX6C,COX5B,COX7C,ATP6V0E1,UQCR11,UQCRC1,COX6A1	24hrs	Hip
ASC	3.81037e-09	2.98588	1.77297e-05	GObp	GO_PHOSPHORYLATION	180	33	NDUFA11,MT3,UQCR10,NDUFB2,COX6B1,ALDOC,ROCK2,COX7B,MMD2,SIK3,COX4I1,TPR,NDUFB9,COX6C,NDUFC2-KCTD14,NDUFC2,COX5B,CDC42BPA,CHCHD10,COX7C,UBA52,AKAP9,UQCR11,UQCRC1,NDUFA12,AGT,NDUFA3,NDUFB8,EFR3B,NDUFA8,COX6A1,CKB,NDUFB4	24hrs	Hip
ASC	4.0817e-09	18.0879	1.89921e-05	GObp	GO_REGULATION_OF_GLYCOPROTEIN_METABOLIC_PROCESS	180	7	MT3,TMEM59,RAMP1,PTX3,ITM2C,CST3,TCF7L2	24hrs	Hip
ASC	6.14276e-09	2.5365	2.85823e-05	GObp	GO_ORGANONITROGEN_COMPOUND_METABOLIC_PROCESS	180	41	GSTM1,NDUFA11,GSTM3,UQCR10,NDUFB2,PDE4B,COX6B1,ALDOC,TST,COX7B,CPE,COX4I1,RHOQ,NDUFB9,COX6C,NDUFC2-KCTD14,NDUFC2,COX5B,MAGI3,CHCHD10,MGST1,COX7C,UBA52,PCSK1N,LDHB,ABHD3,UQCR11,UQCRC1,NDUFA12,AGT,GADL1,NDUFA3,NDUFB8,MRPS28,EIF3A,NDUFA8,GLUL,COX6A1,CKB,LCAT,NDUFB4	24hrs	Hip
ASC	1.08399e-08	2.41668	5.0438e-05	GObp	GO_PHOSPHATE_CONTAINING_COMPOUND_METABOLIC_PROCESS	180	43	NDUFA11,MT3,UQCR10,NDUFB2,PDE4B,PTPN12,COX6B1,ALDOC,ROCK2,COX7B,MMD2,SIK3,COX4I1,RHOQ,TPR,NDUFB9,COX6C,NDUFC2-KCTD14,NDUFC2,COX5B,MAGI3,CDC42BPA,CHCHD10,PHPT1,COX7C,UBA52,AKAP9,LDHB,ABHD3,UQCR11,UQCRC1,NDUFA12,AGT,PPP1R12A,NDUFA3,NDUFB8,EFR3B,NDUFA8,COX6A1,ENTPD2,CKB,LCAT,NDUFB4	24hrs	Hip
ASC	6.30392e-08	2.97145	0.000293321	GObp	GO_CARBOHYDRATE_DERIVATIVE_METABOLIC_PROCESS	180	28	NDUFA11,PMM1,UQCR10,NDUFB2,PDE4B,COX6B1,ALDOC,COX7B,COX4I1,RHOQ,NDUFB9,COX6C,NDUFC2-KCTD14,NDUFC2,COX5B,MAGI3,CHCHD10,COX7C,UQCR11,UQCRC1,NDUFA12,NDUFA3,NDUFB8,NDUFA8,COX6A1,NDUFB4,FBXO2,GALNT2	24hrs	Hip
ASC	1.55915e-07	29.6296	0.000725471	GObp	GO_NEGATIVE_REGULATION_OF_GLYCOPROTEIN_METABOLIC_PROCESS	180	4	TMEM59,PTX3,ITM2C,CST3	24hrs	Hip
ASC	5.91654e-07	4.49583	0.00275297	GObp	GO_CELLULAR_PROTEIN_COMPLEX_ASSEMBLY	180	14	MID1IP1,NDUFA11,UQCR10,NDUFB2,TPR,NDUFB9,RTN4,NDUFC2,AKAP9,NDUFA12,NDUFA3,NDUFB8,NDUFA8,NDUFB4	24hrs	Hip
ASC	7.72789e-05	9.07029	0.00386394	Hallmark	HALLMARK_REACTIVE_OXIGEN_SPECIES_PATHWAY	180	4	MBP,PRNP,MGST1,NDUFB4	24hrs	Hip
ASC	2.65253e-06	2.38436	0.0123422	GObp	GO_MACROMOLECULAR_COMPLEX_ASSEMBLY	180	30	MID1IP1,NDUFA11,GJA1,APOE,UQCR10,NDUFB2,PRNP,SMARCA5,HES5,ATRX,TPR,NDUFB9,RTN4,NDUFC2,MGST1,SLC9A3R1,UBA52,AKAP9,MIF,REPS2,NDUFA12,SCAF11,TCF7L2,NDUFA3,NDUFB8,EIF3A,NDUFA8,GLUL,ENTPD2,NDUFB4	24hrs	Hip
ASC	3.39048e-06	2.55202	0.0157759	GObp	GO_PROTEIN_COMPLEX_BIOGENESIS	180	26	MID1IP1,NDUFA11,GJA1,UQCR10,NDUFB2,PRNP,SMARCA5,HES5,ATRX,TPR,NDUFB9,RTN4,NDUFC2,MGST1,SLC9A3R1,AKAP9,MIF,REPS2,NDUFA12,TCF7L2,NDUFA3,NDUFB8,NDUFA8,GLUL,ENTPD2,NDUFB4	24hrs	Hip
ASC	3.39048e-06	2.55202	0.0157759	GObp	GO_PROTEIN_COMPLEX_ASSEMBLY	180	26	MID1IP1,NDUFA11,GJA1,UQCR10,NDUFB2,PRNP,SMARCA5,HES5,ATRX,TPR,NDUFB9,RTN4,NDUFC2,MGST1,SLC9A3R1,AKAP9,MIF,REPS2,NDUFA12,TCF7L2,NDUFA3,NDUFB8,NDUFA8,GLUL,ENTPD2,NDUFB4	24hrs	Hip
ASC	3.83988e-06	16.4609	0.017867	GObp	GO_REGULATION_OF_ASTROCYTE_DIFFERENTIATION	180	4	HES5,NR2E1,SERPINE2,GPR37L1	24hrs	Hip
ASC	0.000468566	3.88889	0.0234283	Hallmark	HALLMARK_MITOTIC_SPINDLE	180	7	MID1IP1,ABR,ARHGEF12,PCM1,DST,CDC42BPA,HOOK3	24hrs	Hip
ASC	0.000468566	3.88889	0.0234283	Hallmark	HALLMARK_ESTROGEN_RESPONSE_LATE	180	7	SLC1A4,TST,CPE,COX6C,CXCL14,SLC9A3R1,CKB	24hrs	Hip
ASC	5.82865e-06	2.25569	0.0271207	GObp	GO_PROTEIN_COMPLEX_SUBUNIT_ORGANIZATION	180	31	MID1IP1,NDUFA11,GJA1,CFL1,UQCR10,NDUFB2,PRNP,SMARCA5,HES5,ATRX,TPR,PCM1,NDUFB9,RTN4,NDUFC2,MGST1,SLC9A3R1,AKAP9,MIF,REPS2,NDUFA12,TCF7L2,NDUFA3,SORBS1,NDUFB8,HOOK3,MRPS28,NDUFA8,GLUL,ENTPD2,NDUFB4	24hrs	Hip
ASC	9.3328e-06	2.90387	0.0434255	GObp	GO_CELLULAR_MACROMOLECULAR_COMPLEX_ASSEMBLY	180	19	MID1IP1,NDUFA11,UQCR10,NDUFB2,SMARCA5,ATRX,TPR,NDUFB9,RTN4,NDUFC2,UBA52,AKAP9,NDUFA12,SCAF11,NDUFA3,NDUFB8,EIF3A,NDUFA8,NDUFB4	24hrs	Hip
ASC	9.76005e-06	3.57599	0.0454135	GObp	GO_MONOVALENT_INORGANIC_CATION_TRANSPORT	180	14	UQCR10,COX7A2,COX6B1,COX7B,COX4I1,COX6C,COX5B,SLC9A3R1,COX7C,ATP6V0E1,UQCR11,UQCRC1,COX6A1,KCNK2	24hrs	Hip
CA1d	1.60221e-09	10.8927	7.4551e-06	GObp	GO_MODULATION_OF_SYNAPTIC_TRANSMISSION	61	10	NLGN2,SHANK1,NRGN,CNIH2,SYNGR1,GABBR1,VGF,DTNBP1,NLGN1,NCDN	24hrs	Hip
CA1d	2.51191e-09	69.025	1.16879e-05	GObp	GO_REGULATION_OF_ALPHA_AMINO_3_HYDROXY_5_METHYL_4_ISOXAZOLE_PROPIONATE_SELECTIVE_GLUTAMATE_RECEPTOR_ACTIVITY	61	4	NLGN2,SHANK1,CNIH2,NLGN1	24hrs	Hip
CA1d	3.00036e-08	43.7158	0.000139607	GObp	GO_REGULATION_OF_NEUROTRANSMITTER_RECEPTOR_ACTIVITY	61	4	NLGN2,SHANK1,CNIH2,NLGN1	24hrs	Hip
CA1d	6.90906e-07	23.845	0.00321478	GObp	GO_NEGATIVE_REGULATION_OF_PROTEIN_POLYMERIZATION	61	4	CAPZA2,CAPZB,STMN1,TMSB4Y	24hrs	Hip
CA1d	1.50461e-06	14.0115	0.00700094	GObp	GO_REGULATION_OF_RECEPTOR_ACTIVITY	61	5	NLGN2,DMD,SHANK1,CNIH2,NLGN1	24hrs	Hip
CA1d	3.72771e-06	17.0321	0.017345	GObp	GO_VESICLE_TARGETING	61	4	ANKRD28,NSF,CNIH2,NLGN1	24hrs	Hip
CA1d	0.000359272	6.55738	0.0179636	Hallmark	HALLMARK_OXIDATIVE_PHOSPHORYLATION	61	4	IDH3A,COX6C,NDUFB4,GOT2	24hrs	Hip
CA1d	4.275e-06	11.7096	0.0198916	GObp	GO_REGULATION_OF_SYNAPTIC_PLASTICITY	61	5	NRGN,SYNGR1,VGF,NLGN1,NCDN	24hrs	Hip
CA1d	5.25421e-06	8.7822	0.0244478	GObp	GO_VESICLE_LOCALIZATION	61	6	ANKRD28,NSF,SYT5,CNIH2,DTNBP1,NLGN1	24hrs	Hip
CA1d	4.05959e-05	7.88146	0.0273616	Reactome	REACTOME_PLATELET_ACTIVATION_SIGNALING_AND_AGGREGATION	61	5	CFL1,TMSB4X,GNG3,GNB2,TUBA4A	24hrs	Hip
CA1d	6.61286e-06	8.47937	0.0307696	GObp	GO_REGULATION_OF_SYNAPSE_STRUCTURE_OR_ACTIVITY	61	6	NLGN2,NRGN,SYNGR1,VGF,NLGN1,NCDN	24hrs	Hip
CA1d	6.12839e-05	9.57281	0.0413053	Reactome	REACTOME_NEUROTRANSMITTER_RECEPTOR_BINDING_AND_DOWNSTREAM_TRANSMISSION_IN_THE_POSTSYNAPTIC_CELL	61	4	NSF,GNG3,GNB2,GABBR1	24hrs	Hip
CA1v	3.33231e-07	10.0057	0.00155052	GObp	GO_SYNAPTIC_SIGNALING	33	7	MBP,PLCB1,PPP1R9A,SNCB,CTNNB1,SYNJ1,SCN1B	24hrs	Hip
CA1v	3.77334e-06	8.91266	0.0175573	GObp	GO_REGULATION_OF_NEURON_PROJECTION_DEVELOPMENT	33	6	MBP,ZEB2,CFL1,PPP1R9A,CRMP1,SCN1B	24hrs	Hip
CA1v	4.08587e-05	7.65228	0.0275387	Reactome	REACTOME_DEVELOPMENTAL_BIOLOGY	33	5	CFL1,CRMP1,NCOR1,CTNNB1,SCN1B	24hrs	Hip
CA1v	5.93531e-06	5.78578	0.027617	GObp	GO_CYTOSKELETON_ORGANIZATION	33	8	CCDC114,CFL1,AGFG1,PPP1R9A,CRMP1,NCOR1,CTNNB1,MAP1A	24hrs	Hip
DG	3.88996e-06	11.8343	0.000723533	Kegg	KEGG_ALZHEIMERS_DISEASE	50	5	LPL,COX6B1,COX4I1,CALM3,SNCA	24hrs	Hip
DG	2.00957e-05	12.0301	0.00373781	Kegg	KEGG_PARKINSONS_DISEASE	50	4	SNCAIP,COX6B1,COX4I1,SNCA	24hrs	Hip
END	3.80552e-16	19.7239	1.77071e-12	GObp	GO_OXIDATIVE_PHOSPHORYLATION	169	14	NDUFA11,NDUFA7,NDUFB2,NDUFA6,UQCR10,COX6B1,UQCRQ,UQCR11,NDUFAB1,COX7C,NDUFA8,NDUFA1,COX6A1,NDUFB4	24hrs	Hip
END	4.23998e-15	19.4742	2.85775e-12	Reactome	REACTOME_RESPIRATORY_ELECTRON_TRANSPORT	169	13	NDUFA11,NDUFA7,NDUFB2,NDUFA6,COX6B1,UQCRQ,UQCR11,NDUFAB1,COX7C,NDUFA8,NDUFA1,COX6A1,NDUFB4	24hrs	Hip
END	3.18296e-14	13.1492	5.92031e-12	Kegg	KEGG_OXIDATIVE_PHOSPHORYLATION	169	15	NDUFA11,NDUFA7,NDUFB2,NDUFA6,UQCR10,COX6B1,UQCRQ,ATP6V1D,UQCR11,NDUFAB1,COX7C,NDUFA8,NDUFA1,COX6A1,NDUFB4	24hrs	Hip
END	2.22099e-15	17.6256	1.03343e-11	GObp	GO_ELECTRON_TRANSPORT_CHAIN	169	14	NDUFA11,NDUFA7,NDUFB2,NDUFA6,UQCR10,COX6B1,UQCRQ,UQCR11,NDUFAB1,COX7C,NDUFA8,NDUFA1,COX6A1,NDUFB4	24hrs	Hip
END	3.4089e-13	10.2351	6.34055e-11	Kegg	KEGG_HUNTINGTONS_DISEASE	169	16	NDUFA7,DNAH3,NDUFB2,NDUFA6,UQCR10,COX6B1,UQCRQ,UQCR11,CREBBP,NDUFAB1,COX7C,NDUFA8,NDUFA1,COX6A1,NDUFB4,GPX1	24hrs	Hip
END	9.68359e-14	15.6986	6.52674e-11	Reactome	REACTOME_RESPIRATORY_ELECTRON_TRANSPORT_ATP_SYNTHESIS_BY_CHEMIOSMOTIC_COUPLING_AND_HEAT_PRODUCTION_BY_UNCOUPLING_PROTEINS_	169	13	NDUFA11,NDUFA7,NDUFB2,NDUFA6,COX6B1,UQCRQ,UQCR11,NDUFAB1,COX7C,NDUFA8,NDUFA1,COX6A1,NDUFB4	24hrs	Hip
END	4.3704e-13	12.4572	8.12894e-11	Kegg	KEGG_PARKINSONS_DISEASE	169	14	NDUFA7,NDUFB2,NDUFA6,UQCR10,UBB,COX6B1,UQCRQ,UQCR11,NDUFAB1,COX7C,NDUFA8,NDUFA1,COX6A1,NDUFB4	24hrs	Hip
END	1.03929e-12	11.7504	7.00481e-10	Reactome	REACTOME_TCA_CYCLE_AND_RESPIRATORY_ELECTRON_TRANSPORT	169	14	NDUFA11,NDUFA7,NDUFB2,NDUFA6,BSG,COX6B1,UQCRQ,UQCR11,NDUFAB1,COX7C,NDUFA8,NDUFA1,COX6A1,NDUFB4	24hrs	Hip
END	1.46416e-11	9.80358	2.72334e-09	Kegg	KEGG_ALZHEIMERS_DISEASE	169	14	APOE,NDUFA7,NDUFB2,NDUFA6,UQCR10,COX6B1,UQCRQ,UQCR11,NDUFAB1,COX7C,NDUFA8,NDUFA1,COX6A1,NDUFB4	24hrs	Hip
END	1.27949e-12	11.586	5.95346e-09	GObp	GO_CELLULAR_RESPIRATION	169	14	NDUFA11,NDUFA7,NDUFB2,NDUFA6,UQCR10,COX6B1,UQCRQ,UQCR11,NDUFAB1,COX7C,NDUFA8,NDUFA1,COX6A1,NDUFB4	24hrs	Hip
END	1.61817e-10	8.28402	8.09087e-09	Hallmark	HALLMARK_OXIDATIVE_PHOSPHORYLATION	169	14	NDUFA7,NDUFB2,NDUFA6,UQCR10,COX6B1,UQCRQ,ATP6V1D,UQCR11,NDUFAB1,COX7C,NDUFA8,NDUFA1,COX6A1,NDUFB4	24hrs	Hip
END	4.56802e-12	8.72577	2.1255e-08	GObp	GO_ENERGY_DERIVATION_BY_OXIDATION_OF_ORGANIC_COMPOUNDS	169	16	NDUFA11,NDUFA7,NDUFB2,NDUFA6,UQCR10,UBB,COX6B1,UQCRQ,UBA52,UQCR11,NDUFAB1,COX7C,NDUFA8,NDUFA1,COX6A1,NDUFB4	24hrs	Hip
END	6.22383e-11	22.5416	2.89595e-07	GObp	GO_MITOCHONDRIAL_ELECTRON_TRANSPORT_NADH_TO_UBIQUINONE	169	8	NDUFA11,NDUFA7,NDUFB2,NDUFA6,NDUFAB1,NDUFA8,NDUFA1,NDUFB4	24hrs	Hip
END	1.04512e-10	7.78574	4.86296e-07	GObp	GO_NUCLEOSIDE_TRIPHOSPHATE_METABOLIC_PROCESS	169	15	NDUFA11,NDUFA7,NDUFB2,NDUFA6,UQCR10,COX6B1,UQCRQ,RRM2B,UQCR11,NDUFAB1,COX7C,NDUFA8,NDUFA1,COX6A1,NDUFB4	24hrs	Hip
END	2.10325e-10	7.4274	9.78643e-07	GObp	GO_NUCLEOSIDE_MONOPHOSPHATE_METABOLIC_PROCESS	169	15	NDUFA11,NDUFA7,NDUFB2,NDUFA6,UQCR10,COX6B1,UQCRQ,UQCR11,MAGI3,NDUFAB1,COX7C,NDUFA8,NDUFA1,COX6A1,NDUFB4	24hrs	Hip
END	4.8806e-10	6.48456	2.27094e-06	GObp	GO_GENERATION_OF_PRECURSOR_METABOLITES_AND_ENERGY	169	16	NDUFA11,NDUFA7,NDUFB2,NDUFA6,UQCR10,UBB,COX6B1,UQCRQ,UBA52,UQCR11,NDUFAB1,COX7C,NDUFA8,NDUFA1,COX6A1,NDUFB4	24hrs	Hip
END	8.38608e-10	14.0143	3.90204e-06	GObp	GO_MITOCHONDRIAL_RESPIRATORY_CHAIN_COMPLEX_ASSEMBLY	169	9	NDUFA11,NDUFA7,NDUFB2,NDUFA6,UQCR10,NDUFAB1,NDUFA8,NDUFA1,NDUFB4	24hrs	Hip
END	9.55791e-10	16.9062	4.4473e-06	GObp	GO_MITOCHONDRIAL_RESPIRATORY_CHAIN_COMPLEX_I_BIOGENESIS	169	8	NDUFA11,NDUFA7,NDUFB2,NDUFA6,NDUFAB1,NDUFA8,NDUFA1,NDUFB4	24hrs	Hip
END	9.55791e-10	16.9062	4.4473e-06	GObp	GO_MITOCHONDRIAL_RESPIRATORY_CHAIN_COMPLEX_I_ASSEMBLY	169	8	NDUFA11,NDUFA7,NDUFB2,NDUFA6,NDUFAB1,NDUFA8,NDUFA1,NDUFB4	24hrs	Hip
END	9.55791e-10	16.9062	4.4473e-06	GObp	GO_NADH_DEHYDROGENASE_COMPLEX_ASSEMBLY	169	8	NDUFA11,NDUFA7,NDUFB2,NDUFA6,NDUFAB1,NDUFA8,NDUFA1,NDUFB4	24hrs	Hip
END	1.73055e-07	14.491	8.65274e-06	Hallmark	HALLMARK_REACTIVE_OXIGEN_SPECIES_PATHWAY	169	6	MBP,JUNB,NDUFA6,IPCEF1,PRDX1,NDUFB4	24hrs	Hip
END	6.94637e-09	5.10618	3.23215e-05	GObp	GO_PURINE_CONTAINING_COMPOUND_METABOLIC_PROCESS	169	17	NDUFA11,NDUFA7,NDUFB2,NDUFA6,UQCR10,COX6B1,UQCRQ,RAMP2,UQCR11,MAGI3,NDUFAB1,COX7C,NDUFA8,NDUFA1,COX6A1,NDUFB4,GPX1	24hrs	Hip
END	1.17023e-08	29.5858	5.44508e-05	GObp	GO_RESPONSE_TO_INTERFERON_ALPHA	169	5	IFITM1,IFITM2,IFITM3,GAS6,TPR	24hrs	Hip
END	8.03896e-06	5.32544	0.000401948	Hallmark	HALLMARK_ADIPOGENESIS	169	9	APOE,UQCR10,CD151,ALDH2,UQCRQ,UQCR11,NDUFAB1,COX6A1,LAMA4	24hrs	Hip
END	9.86362e-08	4.82377	0.000458954	GObp	GO_GLYCOSYL_COMPOUND_METABOLIC_PROCESS	169	15	NDUFA11,NDUFA7,NDUFB2,NDUFA6,UQCR10,COX6B1,UQCRQ,UQCR11,MAGI3,NDUFAB1,COX7C,NDUFA8,NDUFA1,COX6A1,NDUFB4	24hrs	Hip
END	1.43066e-07	3.98164	0.000665687	GObp	GO_NUCLEOBASE_CONTAINING_SMALL_MOLECULE_METABOLIC_PROCESS	169	18	NDUFA11,NDUFA7,NDUFB2,NDUFA6,UQCR10,COX6B1,UQCRQ,RRM2B,RAMP2,UQCR11,MAGI3,NDUFAB1,COX7C,NDUFA8,NDUFA1,COX6A1,NDUFB4,GPX1	24hrs	Hip
END	1.47159e-07	8.2565	0.00068473	GObp	GO_CELL_JUNCTION_ASSEMBLY	169	9	ACTG1,CLDN5,PKP4,CD151,F11R,DST,RAMP2,ITGA6,VMP1	24hrs	Hip
END	5.13779e-06	8.87574	0.000955629	Kegg	KEGG_CARDIAC_MUSCLE_CONTRACTION	169	6	UQCR10,COX6B1,UQCRQ,UQCR11,COX7C,COX6A1	24hrs	Hip
END	7.02901e-07	3.58616	0.0032706	GObp	GO_MITOCHONDRION_ORGANIZATION	169	18	JUN,NDUFA11,NDUFA7,NDUFB2,NDUFA6,GABARAPL1,UQCR10,PRKG1,MAP1LC3A,RRM2B,NDUFAB1,NDUFA8,TOMM7,NDUFA1,COL4A3BP,MRPS28,NDUFB4,DYNLL1	24hrs	Hip
END	1.85936e-05	6.18211	0.00345842	Kegg	KEGG_TIGHT_JUNCTION	169	7	ACTG1,ASH1L,VAPA,CLDN5,F11R,MAGI3,MYL12A	24hrs	Hip
END	8.62446e-07	15.1722	0.00401296	GObp	GO_PLATELET_AGGREGATION	169	5	ACTG1,HSPB1,GAS6,CLIC1,MYL12A	24hrs	Hip
END	9.60825e-07	2.59891	0.00447072	GObp	GO_MOVEMENT_OF_CELL_OR_SUBCELLULAR_COMPONENT	169	28	ACTG1,HSPB1,IFT20,CCDC141,DNAH3,MYO7A,BSG,UBB,CD151,ID1,DYNLRB1,F11R,PRKG1,PODXL,DST,GAS6,DOCK4,FNBP1L,SEMA7A,ITGA6,NR4A1,MYO1B,SOX17,ENG,NAV1,SEMA6A,DYNLL1,GPX1	24hrs	Hip
END	9.18776e-05	8.76616	0.00459388	Hallmark	HALLMARK_TGF_BETA_SIGNALING	169	4	JUNB,ID3,ID1,ENG	24hrs	Hip
END	1.43319e-06	8.72002	0.00666864	GObp	GO_TRANSFORMING_GROWTH_FACTOR_BETA_RECEPTOR_SIGNALING_PATHWAY	169	7	JUN,CLDN5,UBB,ID1,F11R,UBA52,ENG	24hrs	Hip
END	1.53296e-06	2.86817	0.00713288	GObp	GO_REGULATION_OF_CELL_CYCLE	169	23	JUN,JUNB,MACF1,PTTG1,ROCK2,PKP4,ID3,UBB,ATRX,PSMB3,DST,GAS6,DUSP1,TPR,CLIC1,INSR,UBA52,NR4A1,JUND,CREBBP,SMC3,SMC1A,PTTG2	24hrs	Hip
END	2.0955e-06	2.89928	0.00975035	GObp	GO_OXIDATION_REDUCTION_PROCESS	169	22	NDUFA11,NDUFA7,NDUFB2,NDUFA6,HIGD2A,UQCR10,UBB,COX6B1,ALDH2,UQCRQ,RRM2B,UBA52,UQCR11,DEGS2,NDUFAB1,COX7C,NDUFA8,NDUFA1,COX6A1,PRDX1,NDUFB4,GPX1	24hrs	Hip
END	2.81958e-06	17.5323	0.0131195	GObp	GO_REGULATION_OF_ENDOTHELIAL_CELL_DIFFERENTIATION	169	4	ROCK2,CLDN5,ID1,PPP1R12A	24hrs	Hip
END	0.000307313	4.14201	0.0153657	Hallmark	HALLMARK_TNFA_SIGNALING_VIA_NFKB	169	7	JUN,JUNB,NFAT5,ZFP36,DUSP1,NR4A1,FOSB	24hrs	Hip
END	0.000307313	4.14201	0.0153657	Hallmark	HALLMARK_MITOTIC_SPINDLE	169	7	ABR,DST,ARHGAP29,DOCK4,RAPGEF5,SMC3,SMC1A	24hrs	Hip
END	3.40915e-06	16.9062	0.0158628	GObp	GO_NEGATIVE_REGULATION_OF_CHROMOSOME_SEGREGATION	169	4	PTTG1,ATRX,TPR,PTTG2	24hrs	Hip
END	3.46548e-06	3.21779	0.0161249	GObp	GO_INTERSPECIES_INTERACTION_BETWEEN_ORGANISMS	169	18	JUN,APOE,MFGE8,CFL1,VAPA,UBB,PGLYRP1,F11R,PSMB3,RPL35,GAS6,TPR,INSR,UBA52,MAGI3,CREBBP,DYNLL1,GPX1	24hrs	Hip
END	3.46548e-06	3.21779	0.0161249	GObp	GO_SYMBIOSIS_ENCOMPASSING_MUTUALISM_THROUGH_PARASITISM	169	18	JUN,APOE,MFGE8,CFL1,VAPA,UBB,PGLYRP1,F11R,PSMB3,RPL35,GAS6,TPR,INSR,UBA52,MAGI3,CREBBP,DYNLL1,GPX1	24hrs	Hip
END	4.03189e-06	5.75724	0.0187604	GObp	GO_CELL_JUNCTION_ORGANIZATION	169	9	ACTG1,CLDN5,PKP4,CD151,F11R,DST,RAMP2,ITGA6,VMP1	24hrs	Hip
END	0.000108926	5.54734	0.0202603	Kegg	KEGG_CELL_CYCLE	169	6	PTTG1,CREBBP,SMC3,SMC1A,PTTG2,STAG1	24hrs	Hip
END	4.37796e-06	11.6023	0.0203707	GObp	GO_HOMOTYPIC_CELL_CELL_ADHESION	169	5	ACTG1,HSPB1,GAS6,CLIC1,MYL12A	24hrs	Hip
END	0.000445314	4.41031	0.0222657	Hallmark	HALLMARK_APOPTOSIS	169	6	JUN,GSTM1,IFITM3,HSPB1,CREBBP,GPX1	24hrs	Hip
END	4.91459e-06	11.3792	0.0228676	GObp	GO_INTERACTION_WITH_SYMBIONT	169	5	JUN,APOE,CFL1,VAPA,GPX1	24hrs	Hip
END	8.52173e-06	2.91637	0.0396516	GObp	GO_REGULATION_OF_CELLULAR_COMPONENT_MOVEMENT	169	19	JUN,APOE,IFITM1,HSPB1,SRI,MACF1,PFN1,ROCK2,ABR,PODXL,GAS6,DOCK4,SEMA7A,INSR,SLK,CTSH,ENG,SEMA6A,LAMA4	24hrs	Hip
END	9.2646e-06	13.9227	0.0431082	GObp	GO_NEGATIVE_REGULATION_OF_MITOTIC_NUCLEAR_DIVISION	169	4	PTTG1,ATRX,TPR,PTTG2	24hrs	Hip
ENT	1.14783e-08	49.8442	7.73637e-06	Reactome	REACTOME_GLUTAMATE_NEUROTRANSMITTER_RELEASE_CYCLE	107	4	VAMP2,SLC38A2,SYT1,SLC17A7	24hrs	Hip
ENT	7.02182e-07	8.03939	0.000473271	Reactome	REACTOME_TRANSMISSION_ACROSS_CHEMICAL_SYNAPSES	107	8	GNG3,VAMP2,CALM2,SLC38A2,GLUL,SYT1,SLC17A7,GNB1	24hrs	Hip
ENT	9.80996e-07	21.9901	0.000661192	Reactome	REACTOME_NEUROTRANSMITTER_RELEASE_CYCLE	107	4	VAMP2,SLC38A2,SYT1,SLC17A7	24hrs	Hip
ENT	3.01497e-07	18.3251	0.00140286	GObp	GO_NEUROMUSCULAR_PROCESS_CONTROLLING_BALANCE	107	5	JPH4,SHANK1,DLG4,GAA,ATP2B2	24hrs	Hip
ENT	3.5544e-07	26.7023	0.00165386	GObp	GO_GLUTAMATE_SECRETION	107	4	VAMP2,SLC38A2,SYT1,SLC17A7	24hrs	Hip
ENT	2.53926e-06	6.02954	0.00171146	Reactome	REACTOME_NEURONAL_SYSTEM	107	9	STX1B,GNG3,VAMP2,CALM2,SLC38A2,GLUL,SYT1,SLC17A7,GNB1	24hrs	Hip
ENT	6.43002e-07	6.20983	0.00299189	GObp	GO_MODULATION_OF_SYNAPTIC_TRANSMISSION	107	10	JPH4,STX1B,SHANK1,DLG4,CPLX2,NRGN,VAMP2,ATP2B2,GLUL,SYT1	24hrs	Hip
ENT	2.08313e-06	10.1954	0.00969281	GObp	GO_POSITIVE_REGULATION_OF_SYNAPTIC_TRANSMISSION	107	6	STX1B,SHANK1,DLG4,VAMP2,GLUL,SYT1	24hrs	Hip
ENT	2.52252e-06	6.89091	0.0117373	GObp	GO_ENERGY_DERIVATION_BY_OXIDATION_OF_ORGANIC_COMPOUNDS	107	8	NDUFA11,MT3,GAA,CALM2,UBA52,NDUFB8,NDUFA1,NDUFA12	24hrs	Hip
ENT	2.89882e-06	17.8015	0.0134882	GObp	GO_MITOCHONDRIAL_ELECTRON_TRANSPORT_NADH_TO_UBIQUINONE	107	4	NDUFA11,NDUFB8,NDUFA1,NDUFA12	24hrs	Hip
ENT	3.80795e-06	5.76111	0.0177184	GObp	GO_GENERATION_OF_PRECURSOR_METABOLITES_AND_ENERGY	107	9	NDUFA11,MT3,GAA,CALM2,UBA52,COX17,NDUFB8,NDUFA1,NDUFA12	24hrs	Hip
ENT	8.80522e-06	10.3842	0.0409707	GObp	GO_SYNAPTIC_VESICLE_CYCLE	107	5	STX1B,CPLX2,VAMP2,SYT1,SLC17A7	24hrs	Hip
ENT	6.56483e-05	9.4641	0.044247	Reactome	REACTOME_RESPIRATORY_ELECTRON_TRANSPORT	107	4	NDUFA11,NDUFB8,NDUFA1,NDUFA12	24hrs	Hip
ENT	1.03117e-05	8.01068	0.0479806	GObp	GO_REGULATION_OF_SYNAPTIC_PLASTICITY	107	6	JPH4,DLG4,CPLX2,NRGN,VAMP2,ATP2B2	24hrs	Hip
FB	8.39627e-08	33.543	5.65909e-05	Reactome	REACTOME_INTERFERON_SIGNALING	15	4	IFITM1,IFITM2,IFITM3,UBA52	24hrs	Hip
FB	2.21345e-08	25.3485	0.000102992	GObp	GO_NEGATIVE_REGULATION_OF_LOCOMOTION	15	5	APOE,IFITM1,IFITM2,IFITM3,APOD	24hrs	Hip
FB	1.1617e-06	19.7531	0.000782987	Reactome	REACTOME_CYTOKINE_SIGNALING_IN_IMMUNE_SYSTEM	15	4	IFITM1,IFITM2,IFITM3,UBA52	24hrs	Hip
FB	2.97667e-07	26.0163	0.00138504	GObp	GO_REGULATION_OF_SYMBIOSIS_ENCOMPASSING_MUTUALISM_THROUGH_PARASITISM	15	4	APOE,IFITM1,IFITM2,IFITM3	24hrs	Hip
FB	5.42705e-07	14.7493	0.00252521	GObp	GO_CYTOKINE_MEDIATED_SIGNALING_PATHWAY	15	5	IFITM1,IFITM2,IFITM3,BGN,UBA52	24hrs	Hip
FB	6.82041e-07	14.1844	0.00317354	GObp	GO_REGULATION_OF_MULTI_ORGANISM_PROCESS	15	5	APOE,IFITM1,IFITM2,IFITM3,UBA52	24hrs	Hip
FB	1.43908e-06	5.77201	0.00669606	GObp	GO_CELLULAR_RESPONSE_TO_ORGANIC_SUBSTANCE	15	8	COLEC12,IFITM1,IFITM2,IFITM3,ROCK2,NR1D1,BGN,UBA52	24hrs	Hip
FB	2.992e-06	11.0011	0.0139218	GObp	GO_CELLULAR_RESPONSE_TO_CYTOKINE_STIMULUS	15	5	IFITM1,IFITM2,IFITM3,BGN,UBA52	24hrs	Hip
FB	3.38275e-06	10.7701	0.0157399	GObp	GO_INNATE_IMMUNE_RESPONSE	15	5	COLEC12,IFITM1,IFITM2,IFITM3,UBA52	24hrs	Hip
FB	5.88051e-06	14.1844	0.027362	GObp	GO_PROTEIN_LOCALIZATION_TO_MEMBRANE	15	4	APOE,ROCK2,RPL35,UBA52	24hrs	Hip
FB	7.69877e-06	9.33707	0.0358224	GObp	GO_RESPONSE_TO_CYTOKINE	15	5	IFITM1,IFITM2,IFITM3,BGN,UBA52	24hrs	Hip
INT	1.67304e-06	19.98	0.00778466	GObp	GO_DETOXIFICATION	52	4	PRDX5,PRDX2,MT3,SOD1	24hrs	Hip
INT	2.10289e-06	5.29045	0.00978474	GObp	GO_CELLULAR_MACROMOLECULAR_COMPLEX_ASSEMBLY	52	10	DDX39B,SNRPB,GTF2A2,NDUFV3,ARL6,H1F0,NUP98,CDC123,NDUFA12,CALY	24hrs	Hip
INT	4.98677e-06	16.0256	0.0232034	GObp	GO_REACTIVE_OXYGEN_SPECIES_METABOLIC_PROCESS	52	4	PRDX5,PRDX2,MT3,SOD1	24hrs	Hip
INT	7.3861e-06	14.7929	0.0343675	GObp	GO_CELLULAR_RESPONSE_TO_REACTIVE_OXYGEN_SPECIES	52	4	PRDX5,PRDX2,MT3,SOD1	24hrs	Hip
MAC	6.28949e-08	12.1433	0.00029265	GObp	GO_ACTIVATION_OF_IMMUNE_RESPONSE	27	7	C1QB,C1QA,C1QC,UBB,HSP90AA1,ELMO1,HSP90B1	24hrs	Hip
MAC	5.19346e-07	9.20992	0.00241652	GObp	GO_POSITIVE_REGULATION_OF_IMMUNE_RESPONSE	27	7	C1QB,C1QA,C1QC,UBB,HSP90AA1,ELMO1,HSP90B1	24hrs	Hip
MAC	1.10107e-06	6.90667	0.00512328	GObp	GO_REGULATION_OF_IMMUNE_RESPONSE	27	8	C1QB,C1QA,C1QC,UBB,HSP90AA1,ELMO1,FCGRT,HSP90B1	24hrs	Hip
MAC	3.68017e-06	4.10693	0.0171238	GObp	GO_IMMUNE_SYSTEM_PROCESS	27	11	C1QB,C1QA,C1QC,UBB,RGS1,FN1,PRRC2C,HSP90AA1,ELMO1,FCGRT,HSP90B1	24hrs	Hip
MAC	3.19946e-05	10.6199	0.0215644	Reactome	REACTOME_INNATE_IMMUNE_SYSTEM	27	4	C1QB,C1QA,C1QC,HSP90B1	24hrs	Hip
MAC	7.41303e-06	14.3833	0.0344928	GObp	GO_FC_RECEPTOR_SIGNALING_PATHWAY	27	4	UBB,HSP90AA1,ELMO1,FCGRT	24hrs	Hip
MG	4.15407e-05	10.2564	0.00207704	Hallmark	HALLMARK_G2M_CHECKPOINT	39	4	SMARCC1,HNRNPD,SFPQ,SMC1A	24hrs	Hip
MG	4.15407e-05	10.2564	0.00207704	Hallmark	HALLMARK_E2F_TARGETS	39	4	RFC1,SMC6,HNRNPD,SMC1A	24hrs	Hip
MG	6.32573e-07	24.1327	0.00294336	GObp	GO_REGULATION_OF_CHROMOSOME_SEGREGATION	39	4	SMC6,DUSP1,TPR,SFPQ	24hrs	Hip
MG	1.72633e-06	19.7239	0.00803264	GObp	GO_RESPONSE_TO_CAMP	39	4	FOS,JUNB,KCNQ1,DUSP1	24hrs	Hip
MG	2.83648e-06	17.8372	0.0131981	GObp	GO_RESPONSE_TO_CALCIUM_ION	39	4	FOS,JUNB,DUSP1,HNRNPD	24hrs	Hip
MG	3.24085e-06	9.24001	0.0150797	GObp	GO_RESPONSE_TO_METAL_ION	39	6	FOS,JUNB,C1QA,DUSP1,HNRNPD,TF	24hrs	Hip
MG	3.27071e-06	7.49425	0.0152186	GObp	GO_RESPONSE_TO_INORGANIC_SUBSTANCE	39	7	FOS,JUNB,C1QA,DUSP1,LTC4S,HNRNPD,TF	24hrs	Hip
MG	7.18228e-06	14.7574	0.0334191	GObp	GO_RESPONSE_TO_ORGANOPHOSPHORUS	39	4	FOS,JUNB,KCNQ1,DUSP1	24hrs	Hip
NeuroG2	2.40014e-09	19.5667	4.46426e-07	Kegg	KEGG_OXIDATIVE_PHOSPHORYLATION	53	7	ATP6V1F,NDUFA7,NDUFB7,COX5B,NDUFB10,NDUFA5,NDUFB4	24hrs	Hip
NeuroG2	1.52325e-09	28.6601	1.02667e-06	Reactome	REACTOME_RESPIRATORY_ELECTRON_TRANSPORT	53	6	NDUFA7,NDUFB7,COX5B,NDUFB10,NDUFA5,NDUFB4	24hrs	Hip
NeuroG2	6.9964e-09	23.1036	4.71557e-06	Reactome	REACTOME_RESPIRATORY_ELECTRON_TRANSPORT_ATP_SYNTHESIS_BY_CHEMIOSMOTIC_COUPLING_AND_HEAT_PRODUCTION_BY_UNCOUPLING_PROTEINS_	53	6	NDUFA7,NDUFB7,COX5B,NDUFB10,NDUFA5,NDUFB4	24hrs	Hip
NeuroG2	2.86074e-08	14.2784	5.32097e-06	Kegg	KEGG_HUNTINGTONS_DISEASE	53	7	NDUFA7,POLR2E,NDUFB7,COX5B,NDUFB10,NDUFA5,NDUFB4	24hrs	Hip
NeuroG2	1.26089e-09	44.9236	5.86694e-06	GObp	GO_MITOCHONDRIAL_ELECTRON_TRANSPORT_NADH_TO_UBIQUINONE	53	5	NDUFA7,NDUFB7,NDUFB10,NDUFA5,NDUFB4	24hrs	Hip
NeuroG2	5.86214e-08	17.0237	1.09036e-05	Kegg	KEGG_PARKINSONS_DISEASE	53	6	NDUFA7,NDUFB7,COX5B,NDUFB10,NDUFA5,NDUFB4	24hrs	Hip
NeuroG2	2.35622e-09	26.9542	1.09635e-05	GObp	GO_OXIDATIVE_PHOSPHORYLATION	53	6	NDUFA7,NDUFB7,COX5B,NDUFB10,NDUFA5,NDUFB4	24hrs	Hip
NeuroG2	5.21847e-09	24.0867	2.42815e-05	GObp	GO_ELECTRON_TRANSPORT_CHAIN	53	6	NDUFA7,NDUFB7,COX5B,NDUFB10,NDUFA5,NDUFB4	24hrs	Hip
NeuroG2	7.58692e-09	33.6927	3.53019e-05	GObp	GO_MITOCHONDRIAL_RESPIRATORY_CHAIN_COMPLEX_I_BIOGENESIS	53	5	NDUFA7,NDUFB7,NDUFB10,NDUFA5,NDUFB4	24hrs	Hip
NeuroG2	7.58692e-09	33.6927	3.53019e-05	GObp	GO_MITOCHONDRIAL_RESPIRATORY_CHAIN_COMPLEX_I_ASSEMBLY	53	5	NDUFA7,NDUFB7,NDUFB10,NDUFA5,NDUFB4	24hrs	Hip
NeuroG2	7.58692e-09	33.6927	3.53019e-05	GObp	GO_NADH_DEHYDROGENASE_COMPLEX_ASSEMBLY	53	5	NDUFA7,NDUFB7,NDUFB10,NDUFA5,NDUFB4	24hrs	Hip
NeuroG2	9.40105e-07	11.3208	4.70053e-05	Hallmark	HALLMARK_OXIDATIVE_PHOSPHORYLATION	53	6	ATP6V1F,NDUFA7,NDUFB7,COX5B,NDUFA5,NDUFB4	24hrs	Hip
NeuroG2	3.01849e-07	13.3973	5.6144e-05	Kegg	KEGG_ALZHEIMERS_DISEASE	53	6	NDUFA7,NDUFB7,COX5B,NDUFB10,NDUFA5,NDUFB4	24hrs	Hip
NeuroG2	8.76264e-08	16.0578	5.90602e-05	Reactome	REACTOME_TCA_CYCLE_AND_RESPIRATORY_ELECTRON_TRANSPORT	53	6	NDUFA7,NDUFB7,COX5B,NDUFB10,NDUFA5,NDUFB4	24hrs	Hip
NeuroG2	4.9065e-08	24.8262	0.0002283	GObp	GO_MITOCHONDRIAL_RESPIRATORY_CHAIN_COMPLEX_ASSEMBLY	53	5	NDUFA7,NDUFB7,NDUFB10,NDUFA5,NDUFB4	24hrs	Hip
NeuroG2	9.65236e-08	15.8332	0.000449125	GObp	GO_CELLULAR_RESPIRATION	53	6	NDUFA7,NDUFB7,COX5B,NDUFB10,NDUFA5,NDUFB4	24hrs	Hip
NeuroG2	1.62152e-06	10.4339	0.00754493	GObp	GO_ENERGY_DERIVATION_BY_OXIDATION_OF_ORGANIC_COMPOUNDS	53	6	NDUFA7,NDUFB7,COX5B,NDUFB10,NDUFA5,NDUFB4	24hrs	Hip
NeuroG2	2.25251e-06	9.93049	0.0104809	GObp	GO_NUCLEOSIDE_TRIPHOSPHATE_METABOLIC_PROCESS	53	6	NDUFA7,NDUFB7,COX5B,NDUFB10,NDUFA5,NDUFB4	24hrs	Hip
NeuroG2	3.07704e-06	9.47343	0.0143175	GObp	GO_NUCLEOSIDE_MONOPHOSPHATE_METABOLIC_PROCESS	53	6	NDUFA7,NDUFB7,COX5B,NDUFB10,NDUFA5,NDUFB4	24hrs	Hip
nODC	2.94257e-06	12.5313	0.000147128	Hallmark	HALLMARK_PI3K_AKT_MTOR_SIGNALING	76	5	PAK4,PFN1,CFL1,ARPC3,CDK4	24hrs	Hip
nODC	5.49464e-07	16.6556	0.000370339	Reactome	REACTOME_RESPIRATORY_ELECTRON_TRANSPORT	76	5	COX6B1,COX4I1,NDUFB7,NDUFA12,NDUFB4	24hrs	Hip
nODC	1.33992e-07	9.70167	0.000623464	GObp	GO_ENERGY_DERIVATION_BY_OXIDATION_OF_ORGANIC_COMPOUNDS	76	8	UBB,COX6B1,COX4I1,UBA52,CALM3,NDUFB7,NDUFA12,NDUFB4	24hrs	Hip
nODC	3.63731e-06	9.34288	0.00067654	Kegg	KEGG_ALZHEIMERS_DISEASE	76	6	COX6B1,COX4I1,CALM3,NDUFB7,ATF6,NDUFB4	24hrs	Hip
nODC	1.96547e-06	13.4264	0.00132473	Reactome	REACTOME_RESPIRATORY_ELECTRON_TRANSPORT_ATP_SYNTHESIS_BY_CHEMIOSMOTIC_COUPLING_AND_HEAT_PRODUCTION_BY_UNCOUPLING_PROTEINS_	76	5	COX6B1,COX4I1,NDUFB7,NDUFA12,NDUFB4	24hrs	Hip
nODC	1.15273e-05	9.89315	0.00214408	Kegg	KEGG_PARKINSONS_DISEASE	76	5	UBB,COX6B1,COX4I1,NDUFB7,NDUFB4	24hrs	Hip
nODC	7.91549e-07	15.6642	0.00368308	GObp	GO_OXIDATIVE_PHOSPHORYLATION	76	5	COX6B1,COX4I1,NDUFB7,NDUFA12,NDUFB4	24hrs	Hip
nODC	9.39569e-07	11.4416	0.00437182	GObp	GO_CELL_CYCLE_G2_M_PHASE_TRANSITION	76	6	UBB,UBA52,CALM3,PCM1,TUBB4A,TUBA1A	24hrs	Hip
nODC	0.000113361	6.57895	0.00566803	Hallmark	HALLMARK_OXIDATIVE_PHOSPHORYLATION	76	5	COX6B1,COX4I1,NDUFB7,NDUFB4,ACAA1	24hrs	Hip
nODC	1.53868e-06	13.9978	0.00715946	GObp	GO_ELECTRON_TRANSPORT_CHAIN	76	5	COX6B1,COX4I1,NDUFB7,NDUFA12,NDUFB4	24hrs	Hip
nODC	1.61295e-06	7.20981	0.00750508	GObp	GO_GENERATION_OF_PRECURSOR_METABOLITES_AND_ENERGY	76	8	UBB,COX6B1,COX4I1,UBA52,CALM3,NDUFB7,NDUFA12,NDUFB4	24hrs	Hip
nODC	1.60833e-05	9.33184	0.0108402	Reactome	REACTOME_TCA_CYCLE_AND_RESPIRATORY_ELECTRON_TRANSPORT	76	5	COX6B1,COX4I1,NDUFB7,NDUFA12,NDUFB4	24hrs	Hip
nODC	5.572e-06	15.7109	0.0259265	GObp	GO_REGULATION_OF_DNA_TEMPLATED_TRANSCRIPTION_IN_RESPONSE_TO_STRESS	76	4	SIRT2,UBB,UBA52,ATF6	24hrs	Hip
nODC	5.58412e-06	7.22394	0.0259829	GObp	GO_CELL_CYCLE_PHASE_TRANSITION	76	7	UBB,UBA52,CALM3,PCM1,TUBB4A,TUBA1A,CDK4	24hrs	Hip
nODC	0.000163665	7.79727	0.0304417	Kegg	KEGG_OXIDATIVE_PHOSPHORYLATION	76	4	COX6B1,COX4I1,NDUFB7,NDUFB4	24hrs	Hip
ODC	8.12703e-09	9.57809	1.51163e-06	Kegg	KEGG_PARKINSONS_DISEASE	157	10	NDUFA7,UBB,NDUFB2,UQCR10,COX7A2,COX5B,COX7C,COX6C,NDUFB4,NDUFA3	24hrs	Hip
ODC	9.51068e-09	9.43619	1.76899e-06	Kegg	KEGG_OXIDATIVE_PHOSPHORYLATION	157	10	NDUFA7,NDUFB2,ATP6V0B,UQCR10,COX7A2,COX5B,COX7C,COX6C,NDUFB4,NDUFA3	24hrs	Hip
ODC	9.76139e-08	7.53778	1.81562e-05	Kegg	KEGG_ALZHEIMERS_DISEASE	157	10	APOE,NDUFA7,NDUFB2,UQCR10,COX7A2,COX5B,COX7C,COX6C,NDUFB4,NDUFA3	24hrs	Hip
ODC	5.32738e-07	6.36943	2.66369e-05	Hallmark	HALLMARK_OXIDATIVE_PHOSPHORYLATION	157	10	NDUFA7,NDUFB2,ATP6V0B,UQCR10,COX7A2,COX5B,COX7C,COX6C,NDUFB4,NDUFA3	24hrs	Hip
ODC	2.00276e-08	12.1322	9.31886e-05	GObp	GO_OXIDATIVE_PHOSPHORYLATION	157	8	NDUFA7,NDUFB2,UQCR10,COX5B,COX7C,COX6C,NDUFB4,NDUFA3	24hrs	Hip
ODC	1.96173e-07	11.2876	0.00013222	Reactome	REACTOME_RESPIRATORY_ELECTRON_TRANSPORT	157	7	NDUFA7,NDUFB2,COX5B,COX7C,COX6C,NDUFB4,NDUFA3	24hrs	Hip
ODC	5.41322e-08	10.8416	0.000251877	GObp	GO_ELECTRON_TRANSPORT_CHAIN	157	8	NDUFA7,NDUFB2,UQCR10,COX5B,COX7C,COX6C,NDUFB4,NDUFA3	24hrs	Hip
ODC	2.07923e-06	6.19728	0.000386736	Kegg	KEGG_HUNTINGTONS_DISEASE	157	9	NDUFA7,NDUFB2,UQCR10,COX7A2,COX5B,COX7C,COX6C,NDUFB4,NDUFA3	24hrs	Hip
ODC	1.04337e-06	9.09918	0.00070323	Reactome	REACTOME_RESPIRATORY_ELECTRON_TRANSPORT_ATP_SYNTHESIS_BY_CHEMIOSMOTIC_COUPLING_AND_HEAT_PRODUCTION_BY_UNCOUPLING_PROTEINS_	157	7	NDUFA7,NDUFB2,COX5B,COX7C,COX6C,NDUFB4,NDUFA3	24hrs	Hip
ODC	1.8602e-06	10.3288	0.00125377	Reactome	REACTOME_G_ALPHA1213_SIGNALLING_EVENTS	157	6	RHOB,ROCK2,ABR,GNB2,ARHGEF12,RHOG	24hrs	Hip
ODC	1.96355e-06	18.8724	0.00132343	Reactome	REACTOME_SEMA4D_INDUCED_CELL_MIGRATION_AND_GROWTH_CONE_COLLAPSE	157	4	RHOB,ROCK2,ARHGEF12,RHOG	24hrs	Hip
ODC	4.74528e-06	15.9236	0.00319832	Reactome	REACTOME_SEMA4D_IN_SEMAPHORIN_SIGNALING	157	4	RHOB,ROCK2,ARHGEF12,RHOG	24hrs	Hip
ODC	1.19231e-06	5.87044	0.0055478	GObp	GO_ENERGY_DERIVATION_BY_OXIDATION_OF_ORGANIC_COMPOUNDS	157	10	NDUFA7,UBB,NDUFB2,UQCR10,COX5B,UBA52,COX7C,COX6C,NDUFB4,NDUFA3	24hrs	Hip
ODC	3.95754e-05	7.96178	0.00736103	Kegg	KEGG_CARDIAC_MUSCLE_CONTRACTION	157	5	UQCR10,COX7A2,COX5B,COX7C,COX6C	24hrs	Hip
ODC	1.95657e-06	7.12663	0.00910391	GObp	GO_CELLULAR_RESPIRATION	157	8	NDUFA7,NDUFB2,UQCR10,COX5B,COX7C,COX6C,NDUFB4,NDUFA3	24hrs	Hip
ODC	1.55751e-05	9.3668	0.0104976	Reactome	REACTOME_SEMAPHORIN_INTERACTIONS	157	5	CFL1,RHOB,ROCK2,ARHGEF12,RHOG	24hrs	Hip
ODC	1.57918e-05	6.32425	0.0106437	Reactome	REACTOME_TCA_CYCLE_AND_RESPIRATORY_ELECTRON_TRANSPORT	157	7	NDUFA7,NDUFB2,COX5B,COX7C,COX6C,NDUFB4,NDUFA3	24hrs	Hip
ODC	2.6033e-06	3.0403	0.0121132	GObp	GO_CYTOSKELETON_ORGANIZATION	157	20	CFL1,PFN1,APOE,ROCK2,ABR,STMN1,CNP,EML1,DST,PHIP,SLK,CRYAB,PCM1,ABLIM2,WIPF1,ANK3,CHD4,PROX1,PPP1R12A,RHOG	24hrs	Hip
ODC	3.11177e-06	3.23412	0.0144791	GObp	GO_HEAD_DEVELOPMENT	157	18	MBP,NIPBL,CTNNA2,PCDH9,ABR,S100A1,STMN1,CNP,ATRX,NCOA2,EML1,KCNAB1,HMGCS1,PCM1,UNC5C,PHGDH,CKB,PROX1	24hrs	Hip
ODC	3.68583e-06	3.66059	0.0171502	GObp	GO_MICROTUBULE_BASED_PROCESS	157	15	UBB,ROCK2,STMN1,CNP,EML1,DST,SLK,CRYAB,PCM1,TUBB4A,KIF21A,TUBA1A,CHD4,PPP1R12A,KIF13B	24hrs	Hip
ODC	3.09235e-05	6.76399	0.0208424	Reactome	REACTOME_SIGNALING_BY_RHO_GTPASES	157	6	RHOB,ABR,GDI1,ARAP2,ARHGEF12,RHOG	24hrs	Hip
ODC	0.000779494	4.61553	0.0389747	Hallmark	HALLMARK_COAGULATION	157	5	GNB2,S100A1,S100A13,HTRA1,CSRP1	24hrs	Hip
ODC	1.02968e-05	2.97405	0.047911	GObp	GO_REGULATION_OF_CELLULAR_COMPONENT_MOVEMENT	157	18	CD81,MAGI2,PFN1,PTP4A1,APOE,RHOB,ROCK2,ABR,STMN1,PDE4B,CERS2,APC,SPAG9,SLK,DOCK10,UNC5C,PROX1,TMEFF2	24hrs	Hip
ODC	0.000972862	4.42321	0.0486431	Hallmark	HALLMARK_UV_RESPONSE_DN	157	5	MAGI2,SYNJ2,NR3C1,NIPBL,ATRX	24hrs	Hip
OPC	1.23674e-09	9.905	2.30034e-07	Kegg	KEGG_PARKINSONS_DISEASE	167	11	NDUFC1,UBB,PARK7,NDUFS8,NDUFA6,COX7C,UQCR11,COX5B,NDUFB4,NDUFA3,NDUFB8	24hrs	Hip
OPC	1.37426e-08	7.18563	6.87128e-07	Hallmark	HALLMARK_OXIDATIVE_PHOSPHORYLATION	167	12	NDUFC1,MDH1,NDUFS8,NDUFA6,COX7C,UQCR11,ATP6V0E1,COX5B,LDHB,NDUFB4,NDUFA3,NDUFB8	24hrs	Hip
OPC	1.10278e-09	13.6436	7.43276e-07	Reactome	REACTOME_RESPIRATORY_ELECTRON_TRANSPORT	167	9	NDUFC1,NDUFS8,NDUFA6,COX7C,UQCR11,COX5B,NDUFB4,NDUFA3,NDUFB8	24hrs	Hip
OPC	5.37501e-09	7.76825	9.99751e-07	Kegg	KEGG_HUNTINGTONS_DISEASE	167	12	NDUFC1,PLCB1,SOD1,NDUFS8,GRM5,NDUFA6,COX7C,UQCR11,COX5B,NDUFB4,NDUFA3,NDUFB8	24hrs	Hip
OPC	1.8111e-08	8.87115	3.36864e-06	Kegg	KEGG_OXIDATIVE_PHOSPHORYLATION	167	10	NDUFC1,NDUFS8,NDUFA6,COX7C,UQCR11,ATP6V0E1,COX5B,NDUFB4,NDUFA3,NDUFB8	24hrs	Hip
OPC	1.89146e-08	7.79506	3.51812e-06	Kegg	KEGG_ALZHEIMERS_DISEASE	167	11	NDUFC1,PLCB1,APOE,NDUFS8,NDUFA6,COX7C,UQCR11,COX5B,NDUFB4,NDUFA3,NDUFB8	24hrs	Hip
OPC	1.06025e-09	2.98974	4.93336e-06	GObp	GO_NEUROGENESIS	167	35	ETV4,JUN,IER2,DMD,RAB11A,CFL1,MT3,APOE,RAP1GAP,CTNNA2,UBB,EDNRB,SOD1,SIRT2,MYO7A,LRRC4C,YWHAE,NRXN3,OLIG1,SERPINE2,ITM2C,RERE,PAK3,OMG,SOX6,PRKG1,ERBB4,FEZ1,GRID2,SEMA3D,NLGN1,IL1RAPL1,SOX8,SSH2,GPR37L1	24hrs	Hip
OPC	9.35785e-09	10.9984	6.30719e-06	Reactome	REACTOME_RESPIRATORY_ELECTRON_TRANSPORT_ATP_SYNTHESIS_BY_CHEMIOSMOTIC_COUPLING_AND_HEAT_PRODUCTION_BY_UNCOUPLING_PROTEINS_	167	9	NDUFC1,NDUFS8,NDUFA6,COX7C,UQCR11,COX5B,NDUFB4,NDUFA3,NDUFB8	24hrs	Hip
OPC	2.03916e-09	12.8315	9.48822e-06	GObp	GO_OXIDATIVE_PHOSPHORYLATION	167	9	NDUFC1,NDUFS8,NDUFA6,COX7C,UQCR11,COX5B,NDUFB4,NDUFA3,NDUFB8	24hrs	Hip
OPC	3.26058e-09	6.15208	1.51715e-05	GObp	GO_GENERATION_OF_PRECURSOR_METABOLITES_AND_ENERGY	167	15	NDUFC1,MT3,CROT,UBB,MDH1,ALDOC,NDUFS8,NDUFA6,COX7C,UBA52,UQCR11,COX5B,NDUFB4,NDUFA3,NDUFB8	24hrs	Hip
OPC	4.10493e-09	7.17459	1.91003e-05	GObp	GO_ENERGY_DERIVATION_BY_OXIDATION_OF_ORGANIC_COMPOUNDS	167	13	NDUFC1,MT3,UBB,MDH1,NDUFS8,NDUFA6,COX7C,UBA52,UQCR11,COX5B,NDUFB4,NDUFA3,NDUFB8	24hrs	Hip
OPC	2.85053e-08	8.49365	1.92126e-05	Reactome	REACTOME_TCA_CYCLE_AND_RESPIRATORY_ELECTRON_TRANSPORT	167	10	NDUFC1,NDUFS8,NDUFA6,COX7C,UQCR11,COX5B,LDHB,NDUFB4,NDUFA3,NDUFB8	24hrs	Hip
OPC	5.54512e-09	2.80939	2.58014e-05	GObp	GO_REGULATION_OF_CELL_DIFFERENTIATION	167	35	JUN,ABCG1,DDX39B,FOS,DMD,RAB11A,CFL1,PLCB1,MT3,APOE,JUNB,RAP1GAP,CTNNA2,EDNRB,SOD1,SIRT2,SRSF6,LRRC4C,SOCS3,JUND,SERPINE2,ITM2C,PAK3,OMG,TMEM100,SOX6,ERBB4,FEZ1,GRID2,SEMA3D,NLGN1,IL1RAPL1,SOX8,SSH2,GPR37L1	24hrs	Hip
OPC	6.2163e-09	11.4664	2.89244e-05	GObp	GO_ELECTRON_TRANSPORT_CHAIN	167	9	NDUFC1,NDUFS8,NDUFA6,COX7C,UQCR11,COX5B,NDUFB4,NDUFA3,NDUFB8	24hrs	Hip
OPC	7.84604e-09	4.32348	3.65076e-05	GObp	GO_REGULATION_OF_NEURON_DIFFERENTIATION	167	20	DMD,RAB11A,CFL1,MT3,APOE,RAP1GAP,EDNRB,LRRC4C,SERPINE2,ITM2C,PAK3,OMG,FEZ1,GRID2,SEMA3D,NLGN1,IL1RAPL1,SOX8,SSH2,GPR37L1	24hrs	Hip
OPC	1.64876e-08	3.67265	7.67167e-05	GObp	GO_REGULATION_OF_NERVOUS_SYSTEM_DEVELOPMENT	167	23	DMD,RAB11A,CFL1,MT3,APOE,RAP1GAP,EDNRB,SIRT2,LRRC4C,NRXN3,SERPINE2,ITM2C,PAK3,OMG,ERBB4,FEZ1,GRID2,SEMA3D,NLGN1,IL1RAPL1,SOX8,SSH2,GPR37L1	24hrs	Hip
OPC	3.29971e-08	8.37486	0.000153535	GObp	GO_CELLULAR_RESPIRATION	167	10	NDUFC1,MDH1,NDUFS8,NDUFA6,COX7C,UQCR11,COX5B,NDUFB4,NDUFA3,NDUFB8	24hrs	Hip
OPC	3.21788e-06	12.2205	0.000160894	Hallmark	HALLMARK_REACTIVE_OXIGEN_SPECIES_PATHWAY	167	5	JUNB,SOD1,PRNP,NDUFA6,NDUFB4	24hrs	Hip
OPC	5.26325e-08	17.1086	0.000244899	GObp	GO_MITOCHONDRIAL_ELECTRON_TRANSPORT_NADH_TO_UBIQUINONE	167	6	NDUFC1,NDUFS8,NDUFA6,NDUFB4,NDUFA3,NDUFB8	24hrs	Hip
OPC	5.96423e-08	4.69649	0.000277516	GObp	GO_REGULATION_OF_NEURON_PROJECTION_DEVELOPMENT	167	16	DMD,RAB11A,CFL1,MT3,APOE,LRRC4C,SERPINE2,ITM2C,PAK3,OMG,FEZ1,GRID2,SEMA3D,NLGN1,IL1RAPL1,SSH2	24hrs	Hip
OPC	1.02173e-07	2.50695	0.000475412	GObp	GO_REGULATION_OF_MULTICELLULAR_ORGANISMAL_DEVELOPMENT	167	35	ETV4,JUN,PDCD6,DDX39B,FOS,DMD,RAB11A,CFL1,PLCB1,MT3,APOE,RAP1GAP,UBB,EDNRB,SOD1,SIRT2,SRSF6,LRRC4C,NRXN3,SERPINE2,ITM2C,UBA52,PAK3,OMG,TMEM100,SOX6,ERBB4,FEZ1,GRID2,SEMA3D,NLGN1,IL1RAPL1,SOX8,SSH2,GPR37L1	24hrs	Hip
OPC	1.26172e-07	3.29485	0.000587076	GObp	GO_REGULATION_OF_CELL_DEVELOPMENT	167	23	DDX39B,DMD,RAB11A,CFL1,MT3,APOE,RAP1GAP,EDNRB,SIRT2,LRRC4C,SERPINE2,ITM2C,PAK3,OMG,ERBB4,FEZ1,GRID2,SEMA3D,NLGN1,IL1RAPL1,SOX8,SSH2,GPR37L1	24hrs	Hip
OPC	1.55007e-07	29.9401	0.000721247	GObp	GO_NEURON_CELL_CELL_ADHESION	167	4	NRXN2,NRXN3,NLGN1,NCAM2	24hrs	Hip
OPC	2.26346e-07	3.86324	0.00105319	GObp	GO_REGULATION_OF_CELL_PROJECTION_ORGANIZATION	167	18	DMD,RAB11A,CFL1,MT3,APOE,RAP1GAP,LRRC4C,BRK1,SERPINE2,ITM2C,PAK3,OMG,FEZ1,GRID2,SEMA3D,NLGN1,IL1RAPL1,SSH2	24hrs	Hip
OPC	3.24075e-07	5.48521	0.00150792	GObp	GO_NEGATIVE_REGULATION_OF_NERVOUS_SYSTEM_DEVELOPMENT	167	12	MT3,APOE,RAP1GAP,EDNRB,SIRT2,ITM2C,OMG,ERBB4,SEMA3D,NLGN1,SOX8,GPR37L1	24hrs	Hip
OPC	4.10179e-07	12.8315	0.00190856	GObp	GO_MITOCHONDRIAL_RESPIRATORY_CHAIN_COMPLEX_I_BIOGENESIS	167	6	NDUFC1,NDUFS8,NDUFA6,NDUFB4,NDUFA3,NDUFB8	24hrs	Hip
OPC	4.10179e-07	12.8315	0.00190856	GObp	GO_MITOCHONDRIAL_RESPIRATORY_CHAIN_COMPLEX_I_ASSEMBLY	167	6	NDUFC1,NDUFS8,NDUFA6,NDUFB4,NDUFA3,NDUFB8	24hrs	Hip
OPC	4.10179e-07	12.8315	0.00190856	GObp	GO_NADH_DEHYDROGENASE_COMPLEX_ASSEMBLY	167	6	NDUFC1,NDUFS8,NDUFA6,NDUFB4,NDUFA3,NDUFB8	24hrs	Hip
OPC	4.91195e-07	2.52213	0.00228553	GObp	GO_REGULATION_OF_CELL_DEATH	167	31	JUN,PDCD6,CFL1,MT3,APOE,JUNB,ABR,UBB,EDNRB,PARK7,SOD1,TRAF4,SIRT2,PRNP,SRSF6,SOCS3,YWHAE,JUND,ITM2C,UBA52,PAK3,BNIP3L,MIF,BEX2,ERBB4,GRID2,NOS1AP,TRAF5,SOX8,GPR37L1,TMBIM4	24hrs	Hip
OPC	6.24529e-07	6.27018	0.00290593	GObp	GO_NEGATIVE_REGULATION_OF_NEURON_DIFFERENTIATION	167	10	MT3,APOE,RAP1GAP,EDNRB,ITM2C,OMG,SEMA3D,NLGN1,SOX8,GPR37L1	24hrs	Hip
OPC	6.50352e-07	2.92396	0.00302609	GObp	GO_NEGATIVE_REGULATION_OF_MULTICELLULAR_ORGANISMAL_PROCESS	167	24	ETV4,NDRG2,MT3,SRI,APOE,ABR,RAP1GAP,UBB,EDNRB,SOD1,SIRT2,PRNP,SRSF6,SERPINE2,ITM2C,UBA52,OMG,CST3,PRKG1,ERBB4,SEMA3D,NLGN1,SOX8,GPR37L1	24hrs	Hip
OPC	1.07411e-06	3.01457	0.00499782	GObp	GO_NEURON_DIFFERENTIATION	167	22	ETV4,JUN,IER2,RAB11A,APOE,CTNNA2,UBB,SOD1,MYO7A,NRXN3,OLIG1,ITM2C,RERE,PAK3,OMG,PRKG1,ERBB4,FEZ1,GRID2,NLGN1,IL1RAPL1,SOX8	24hrs	Hip
OPC	1.66539e-06	4.74299	0.00774904	GObp	GO_NEGATIVE_REGULATION_OF_CELL_DEVELOPMENT	167	12	MT3,APOE,RAP1GAP,EDNRB,SIRT2,ITM2C,OMG,ERBB4,SEMA3D,NLGN1,SOX8,GPR37L1	24hrs	Hip
OPC	2.18178e-06	18.4247	0.0101518	GObp	GO_VASODILATION	167	4	APOE,EDNRB,SOD1,PRKG1	24hrs	Hip
OPC	2.97349e-06	2.62173	0.0138356	GObp	GO_POSITIVE_REGULATION_OF_DEVELOPMENTAL_PROCESS	167	25	JUN,PDCD6,DDX39B,FOS,DMD,RAB11A,PLCB1,APOE,JUNB,CTNNA2,SIRT2,SRSF6,SOCS3,JUND,NRXN3,SERPINE2,PAK3,TMEM100,SOX6,ERBB4,FEZ1,NLGN1,IL1RAPL1,SOX8,GPR37L1	24hrs	Hip
OPC	3.36163e-06	9.45477	0.0156417	GObp	GO_MITOCHONDRIAL_RESPIRATORY_CHAIN_COMPLEX_ASSEMBLY	167	6	NDUFC1,NDUFS8,NDUFA6,NDUFB4,NDUFA3,NDUFB8	24hrs	Hip
OPC	3.52648e-06	5.25265	0.0164087	GObp	GO_NUCLEOSIDE_TRIPHOSPHATE_METABOLIC_PROCESS	167	10	NDUFC1,ALDOC,NDUFS8,NDUFA6,COX7C,UQCR11,COX5B,NDUFB4,NDUFA3,NDUFB8	24hrs	Hip
OPC	4.65626e-06	2.39864	0.0216656	GObp	GO_MACROMOLECULAR_COMPLEX_ASSEMBLY	167	28	DDX39B,DMD,RAB11A,NDUFC1,SRSF5,NAP1L5,APOE,UBB,ATRX,NDUFS8,SIRT2,PRNP,SRSF6,NDUFA6,BRK1,UBA52,MIF,KCND2,TPR,CIRBP,EIF3A,NLGN1,NDUFB4,NDUFA3,GLUL,NDUFB8,NASP,IL1RAP	24hrs	Hip
OPC	5.31179e-06	2.91034	0.0247158	GObp	GO_POSITIVE_REGULATION_OF_CELL_DIFFERENTIATION	167	20	JUN,DDX39B,FOS,DMD,RAB11A,PLCB1,APOE,JUNB,CTNNA2,SIRT2,SOCS3,JUND,SERPINE2,PAK3,TMEM100,SOX6,FEZ1,NLGN1,IL1RAPL1,SOX8	24hrs	Hip
OPC	5.53595e-06	5.0109	0.0257588	GObp	GO_NUCLEOSIDE_MONOPHOSPHATE_METABOLIC_PROCESS	167	10	NDUFC1,ALDOC,NDUFS8,NDUFA6,COX7C,UQCR11,COX5B,NDUFB4,NDUFA3,NDUFB8	24hrs	Hip
OPC	6.64186e-06	6.14156	0.0309046	GObp	GO_CELLULAR_RESPONSE_TO_INORGANIC_SUBSTANCE	167	8	JUN,FOS,MT3,JUNB,ATRX,SOD1,PRNP,JUND	24hrs	Hip
OPC	6.82952e-06	2.35154	0.0317778	GObp	GO_CELL_DEVELOPMENT	167	28	ETV4,AFF4,JUN,DMD,RAB11A,MT3,APOE,CTNNA2,UBB,ATRX,EDNRB,SOD1,SIRT2,MYO7A,JUND,NRXN3,RERE,PAK3,OMG,TMEM100,SOX6,SGCZ,PRKG1,ERBB4,FEZ1,SEMA3D,NLGN1,SOX8	24hrs	Hip
OPC	8.52776e-06	4.08274	0.0396797	GObp	GO_RESPONSE_TO_OXIDATIVE_STRESS	167	12	JUN,FOS,MT3,APOE,ROMO1,PARK7,SOD1,NDUFS8,SIRT2,PRNP,NDUFA6,NDUFB4	24hrs	Hip
PER	1.66398e-05	11.4449	0.0112152	Reactome	REACTOME_HEMOSTASIS	15	4	TMSB4X,RASGRP2,DOCK10,PRKG1	24hrs	Hip
SMC	1.8077e-11	86.9565	1.21839e-08	Reactome	REACTOME_SMOOTH_MUSCLE_CONTRACTION	46	5	MYL9,ACTA2,CALM2,TPM2,LMOD1	24hrs	Hip
SMC	1.20409e-09	45.2899	8.11555e-07	Reactome	REACTOME_MUSCLE_CONTRACTION	46	5	MYL9,ACTA2,CALM2,TPM2,LMOD1	24hrs	Hip
SMC	2.11575e-08	19.6143	3.9353e-06	Kegg	KEGG_PARKINSONS_DISEASE	46	6	COX6B1,COX8A,COX7C,UQCR11,NDUFS7,SLC25A4	24hrs	Hip
SMC	2.79089e-08	27.1739	5.19106e-06	Kegg	KEGG_CARDIAC_MUSCLE_CONTRACTION	46	5	COX6B1,COX8A,COX7C,UQCR11,TPM2	24hrs	Hip
SMC	3.4633e-07	13.0435	1.73165e-05	Hallmark	HALLMARK_OXIDATIVE_PHOSPHORYLATION	46	6	COX6B1,COX8A,COX7C,UQCR11,NDUFS7,SLC25A4	24hrs	Hip
SMC	2.58601e-08	27.5179	1.74297e-05	Reactome	REACTOME_RESPIRATORY_ELECTRON_TRANSPORT	46	5	COX6B1,COX8A,COX7C,UQCR11,NDUFS7	24hrs	Hip
SMC	1.1015e-07	15.4361	2.04879e-05	Kegg	KEGG_ALZHEIMERS_DISEASE	46	6	COX6B1,COX8A,COX7C,UQCR11,NDUFS7,CALM2	24hrs	Hip
SMC	3.17035e-08	18.5014	2.13682e-05	Reactome	REACTOME_TCA_CYCLE_AND_RESPIRATORY_ELECTRON_TRANSPORT	46	6	COX6B1,BSG,COX8A,COX7C,UQCR11,NDUFS7	24hrs	Hip
SMC	2.04109e-07	14.1011	3.79642e-05	Kegg	KEGG_HUNTINGTONS_DISEASE	46	6	COX6B1,COX8A,COX7C,UQCR11,NDUFS7,SLC25A4	24hrs	Hip
SMC	9.4786e-08	22.1828	6.38858e-05	Reactome	REACTOME_RESPIRATORY_ELECTRON_TRANSPORT_ATP_SYNTHESIS_BY_CHEMIOSMOTIC_COUPLING_AND_HEAT_PRODUCTION_BY_UNCOUPLING_PROTEINS_	46	5	COX6B1,COX8A,COX7C,UQCR11,NDUFS7	24hrs	Hip
SMC	6.34774e-07	16.1031	0.000118068	Kegg	KEGG_OXIDATIVE_PHOSPHORYLATION	46	5	COX6B1,COX8A,COX7C,UQCR11,NDUFS7	24hrs	Hip
SMC	3.74935e-08	25.8799	0.000174457	GObp	GO_OXIDATIVE_PHOSPHORYLATION	46	5	COX6B1,COX8A,COX7C,UQCR11,NDUFS7	24hrs	Hip
SMC	7.38238e-08	23.1267	0.000343502	GObp	GO_ELECTRON_TRANSPORT_CHAIN	46	5	COX6B1,COX8A,COX7C,UQCR11,NDUFS7	24hrs	Hip
SMC	6.54001e-06	15.1229	0.00121644	Kegg	KEGG_VASCULAR_SMOOTH_MUSCLE_CONTRACTION	46	4	PPP1R14A,MYL9,ACTA2,CALM2	24hrs	Hip
SMC	3.02484e-07	10.4229	0.00140746	GObp	GO_GENERATION_OF_PRECURSOR_METABOLITES_AND_ENERGY	46	7	COX6B1,COX8A,COX7C,UQCR11,NDUFS7,SLC25A4,CALM2	24hrs	Hip
SMC	6.00473e-07	12.0216	0.002794	GObp	GO_ENERGY_DERIVATION_BY_OXIDATION_OF_ORGANIC_COMPOUNDS	46	6	COX6B1,COX8A,COX7C,UQCR11,NDUFS7,CALM2	24hrs	Hip
SMC	8.36947e-07	11.4416	0.00389431	GObp	GO_NUCLEOSIDE_TRIPHOSPHATE_METABOLIC_PROCESS	46	6	COX6B1,COX8A,COX7C,UQCR11,RRM2B,NDUFS7	24hrs	Hip
SMC	8.90098e-07	15.2022	0.00414162	GObp	GO_CELLULAR_RESPIRATION	46	5	COX6B1,COX8A,COX7C,UQCR11,NDUFS7	24hrs	Hip
SMC	9.67826e-07	11.1961	0.0045033	GObp	GO_MUSCLE_CONTRACTION	46	6	MYL9,ACTA2,CALM2,FXYD1,TPM2,LMOD1	24hrs	Hip
SMC	3.4393e-06	9.25069	0.0160031	GObp	GO_MUSCLE_SYSTEM_PROCESS	46	6	MYL9,ACTA2,CALM2,FXYD1,TPM2,LMOD1	24hrs	Hip
SMC	4.59243e-06	16.2536	0.0213686	GObp	GO_HYDROGEN_ION_TRANSMEMBRANE_TRANSPORT	46	4	COX6B1,COX8A,COX7C,UQCR11	24hrs	Hip
SUB	1.16123e-07	4.86517	0.00054032	GObp	GO_CENTRAL_NERVOUS_SYSTEM_DEVELOPMENT	66	14	TYRO3,SLC8A1,NRGN,BPTF,UBE3A,MAP2,CNTN4,CNTNAP2,KCNAB1,PTEN,CTNNB1,CALM2,DCLK1,CLU	24hrs	Hip
SUB	3.90861e-07	12.987	0.00181868	GObp	GO_REGULATION_OF_SYNAPTIC_PLASTICITY	66	6	NRGN,DBN1,CNTN4,SYP,PTEN,VAMP2	24hrs	Hip
SUB	4.52358e-07	5.12886	0.00210482	GObp	GO_HEAD_DEVELOPMENT	66	12	TYRO3,SLC8A1,NRGN,BPTF,UBE3A,CNTN4,CNTNAP2,KCNAB1,PTEN,CTNNB1,CALM2,DCLK1	24hrs	Hip
SUB	0.000175011	7.67165	0.00875053	Hallmark	HALLMARK_UV_RESPONSE_UP	66	4	TYRO3,PSMC3,NPTX2,AP2S1	24hrs	Hip
SUB	1.91923e-06	3.66865	0.00893016	GObp	GO_VESICLE_MEDIATED_TRANSPORT	66	15	TYRO3,ARF5,UBE3A,CPNE6,SYP,ARPC3,DNM3,VAMP2,CTNNB1,FNBP1L,CALM2,GOLGA4,AP2S1,PCLO,CLU	24hrs	Hip
SUB	6.46019e-06	7.04722	0.0300593	GObp	GO_MODULATION_OF_SYNAPTIC_TRANSMISSION	66	7	NRGN,DBN1,GRM7,CNTN4,SYP,PTEN,VAMP2	24hrs	Hip
SUB	1.06369e-05	13.7741	0.0494934	GObp	GO_REGULATION_OF_CATION_CHANNEL_ACTIVITY	66	4	KCNQ1,KCNAB1,VAMP2,CALM2	24hrs	Hip
